# Supplementary material for: The Oncogenic PI3K-Induced Transcriptomic Landscape Reveals Key Functions in Splicing and Gene Expression Regulation
Source: Oxford University Press journal article supplement (doi:10.1158/0008-5472.can-22-0446), 2022-04-20
Supplement: can-22-0446-sst4.xlsx [file can-22-0446-sst4.xlsx]

## Sheet: MCF10A_hallmark_PI3K_Activation
Description	setSize	enrichmentScore	NES	pvalue	p.adjust	qvalues	rank	leading_edge	core_enrichment
HALLMARK_MTORC1_SIGNALING	199	0.611539	2.4741	0.000282725	0.000643103	0.000162468	4850	tags=53%, list=17%, signal=45%	PLOD2/CDKN1A/RIT1/STC1/SQSTM1/GBE1/SLC7A11/IFRD1/VLDLR/GSR/P4HA1/TFRC/PSAT1/GLRX/EGLN3/NFIL3/TXNRD1/ME1/SERPINH1/UFM1/POLR3G/INSIG1/GAPDH/PNP/AURKA/LDLR/STIP1/XBP1/CCT6A/RDH11/PNO1/FADS1/G6PD/NUFIP1/MTHFD2/DAPP1/SSR1/GLA/MTHFD2L/RRP9/HK2/PGK1/PSME3/PGM1/SORD/PDK1/YKT6/PRDX1/ELOVL5/ENO1/HSPD1/HSPA4/LDHA/PSPH/TMEM97/GCLC/ATP6V1D/SLC6A6/ALDOA/PSMC4/ARPC5L/HMBS/IFI30/DDIT4/IDI1/QDPR/TRIB3/MLLT11/CYB5…
HALLMARK_MYC_TARGETS_V2	58	0.704699	2.37823	0.000236742	0.000643103	0.000162468	4676	tags=74%, list=16%, signal=62%	NIP7/BYSL/GRWD1/FARSA/PPAN/NOP56/PPRC1/NOP16/SLC19A1/NOP2/RRP9/HK2/DUSP2/SORD/IMP4/PUS1/NDUFAF4/WDR74/MPHOSPH10/HSPD1/AIMP2/TMEM97/WDR43/MYBBP1A/RCL1/MRTO4/RABEPK/NOLC1/RRP12/SRM/TFB2M/PA2G4/LAS1L/GNL3/PHB/PES1/SUPV3L1/HSPE1/MAP3K6/EXOSC5/NOC4L/PRMT3/CBX3
HALLMARK_INTERFERON_GAMMA_RESPONSE	185	0.587827	2.36029	0.000277624	0.000643103	0.000162468	2573	tags=38%, list=9%, signal=35%	CFB/CFH/C1S/CDKN1A/IFI44L/IFI44/LGALS3BP/C1R/SOD2/IFIT3/TNFAIP6/IFIT1/ICAM1/PML/SAMD9L/IL15RA/STAT4/UBE2L6/IFITM2/HIF1A/FPR1/MVP/CASP8/PDE4B/PNP/IFITM3/SLAMF7/IFIT2/IFI35/B2M/CASP4/TNFAIP3/SOCS3/PTGS2/PSMB8/MTHFD2/CASP1/SP110/HLA-B/LAP3/NLRC5/NMI/ISOC1/TOR1B/IFI27/SOCS1/ZNFX1/STAT1/HLA-A/PSMB10/OASL/APOL6/IRF9/ISG15/PSMB9/EPSTI1/TRIM21/IFI30/SECTM1/RIPK1/PNPT1/PFKP/PTPN1/PSME2/CASP7/NAMPT/FAS/ST3…
HALLMARK_MYC_TARGETS_V1	199	0.576893	2.33393	0.000282725	0.000643103	0.000162468	7766	tags=68%, list=27%, signal=50%	IFRD1/RSL1D1/SRSF7/DDX21/EIF2S1/NOP56/NOP16/NCBP2/CSTF2/RRP9/POLE3/PABPC4/PGK1/CDC20/EIF4E/KPNA2/CCT2/TYMS/HDDC2/PTGES3/HSPD1/CNBP/AIMP2/BUB3/CCT5/LDHA/SERBP1/EIF3J/SRSF3/PSMA6/TCP1/KARS/CTPS1/CCT4/PSMC4/EIF3B/NOLC1/SRM/RUVBL2/CCT3/VDAC1/PA2G4/CYC1/EIF4A1/VBP1/PRDX3/VDAC3/PSMD7/GNL3/SF3B3/PHB2/CCT7/PHB/NME1/EIF3D/ODC1/TUFM/MRPL9/ABCE1/HSP90AB1/PCBP1/EPRS/EIF2S2/G3BP1/PSMA2/PSMA1/SSBP1/PWP1/SSB/EE…
HALLMARK_GLYCOLYSIS	197	0.557944	2.25488	0.000281215	0.000643103	0.000162468	2883	tags=39%, list=10%, signal=35%	IGFBP3/DCN/PLOD2/STC1/UGP2/SDC3/MED24/CHST2/TGFBI/VLDLR/P4HA1/GLRX/EGLN3/KDELR3/QSOX1/ME1/PLOD1/PAM/SPAG4/ENO2/CAPN5/GALK1/ALG1/AURKA/VEGFA/SLC16A3/GNPDA1/CHPF2/G6PD/SDC2/GPC1/STC2/ANGPTL4/HK2/ALDH9A1/PGK1/GNE/TPST1/B3GAT3/TPBG/ENO1/PKM/TXN/RARS/FAM162A/CHST1/SAP30/SRD5A3/PRPS1/LDHA/IER3/GCLC/POLR3K/ECD/FUT8/ALDOA/B4GALT7/ADORA2B/PSMC4/P4HA2/HS6ST2/PPP2CB/TALDO1/HAX1/DDIT4/AC074143.1/PFKP/CYB5A/T…
HALLMARK_OXIDATIVE_PHOSPHORYLATION	200	0.556976	2.25357	0.000282965	0.000643103	0.000162468	6474	tags=62%, list=23%, signal=48%	TIMM17A/MRPS30/DECR1/BAX/SLC25A20/GRPEL1/VDAC2/ALAS1/PMPCA/HCCS/ATP6V1E1/ATP6V0B/CYCS/ATP5PD/LDHA/OGDH/ECH1/MRPL35/ATP5F1B/ATP6V1D/IDH3B/BDH2/SLC25A4/COX7A2L/ATP6V0E1/NDUFB5/ATP5F1E/MTX2/ATP5MC2/TIMM10/CYB5A/VDAC1/TIMM50/CYC1/CASP7/PRDX3/VDAC3/ECHS1/NDUFA8/PHB2/ACO2/ATP5MC1/RHOT2/MRPS12/IDH1/PDHA1/DLST/MRPL34/UQCR11/POR/NDUFA9/MRPS22/ETFB/NQO2/MRPS11/SUPV3L1/NDUFA6/IDH3G/COX15/SUCLA2/TIMM9/TIMM8B…
HALLMARK_UNFOLDED_PROTEIN_RESPONSE	113	0.58893	2.21201	0.000256871	0.000643103	0.000162468	5733	tags=62%, list=20%, signal=50%	PSAT1/KDELR3/IFIT1/ATF3/VEGFA/GOSR2/XBP1/EIF2S1/DDX10/MTHFD2/SSR1/NOP56/CHAC1/RRP9/STC2/DNAJB9/KIF5B/EIF4E/BAG3/EXOSC4/HERPUD1/DKC1/NABP1/EXOSC9/DCTN1/EXOSC2/FUS/NOLC1/TARS/GEMIN4/FKBP14/DDIT4/SRPRB/EIF4A1/LSM1/ATF4/H2AFX/ERO1A/PREB/SPCS3/SDAD1/CKS1B/BANF1/EIF4A3/TSPYL2/ERN1/TUBB2A/CEBPB/SRPRA/NOP14/DCP1A/CXXC1/ARFGAP1/SERP1/EXOSC5/EIF4G1/CALR/HSPA5/IMP3/MTREX/SEC11A/EXOSC1/POP4/WFS1/ATF6/SPCS1/S…
HALLMARK_HYPOXIA	198	0.546513	2.2115	0.000281294	0.000643103	0.000162468	2848	tags=38%, list=10%, signal=35%	IGFBP3/DCN/HMOX1/CDKN1A/LOX/STC1/UGP2/SDC3/ALDOC/CDKN1C/GBE1/TGM2/CHST2/TGFBI/VLDLR/P4HA1/GLRX/KDELR3/NFIL3/EDN2/PAM/HEXA/S100A4/ENO2/GALK1/GAPDH/BNIP3L/SRPX/ATF3/VEGFA/SELENBP1/PGF/F3/FOS/GCNT2/TNFAIP3/SDC2/GPC1/JMJD6/STC2/ANGPTL4/HK2/PGK1/PGM1/TMEM45A/PDK1/PLAUR/CCN5/PFKFB3/TPBG/DUSP1/ENO1/FAM162A/BGN/JUN/SAP30/LDHA/IER3/NOCT/HK1/SLC6A6/ALDOA/ADORA2B/P4HA2/CA12/DDIT4/MT1E/SLC25A1/PFKP/TPI1/PPFI…
HALLMARK_EPITHELIAL_MESENCHYMAL_TRANSITION	189	0.526273	2.11768	0.00027972	0.000643103	0.000162468	1428	tags=32%, list=5%, signal=30%	IGFBP3/DCN/VIM/PLOD2/CDH2/SERPINE2/ITGA5/LOX/CXCL8/COLGALT1/FBN1/FERMT2/TGM2/AREG/TGFBI/WNT5A/ANPEP/COL4A2/IL32/PCOLCE2/ADAM12/QSOX1/PVR/MFAP5/GADD45A/P3H1/PLOD1/FN1/SERPINH1/TAGLN/ACTA2/FAP/SAT1/CD59/TNC/FBLN5/ENO2/COL12A1/SNTB1/CXCL1/FGF2/VEGFA/FSTL1/TNFAIP3/BDNF/GPC1/GEM/EMP3/COL4A1/LOXL2/CALU/ITGB3/PLAUR/PTX3/ABI3BP/FBN2/BGN/FSTL3/JUN/PLOD3
HALLMARK_INTERFERON_ALPHA_RESPONSE	96	0.578341	2.11128	0.000254259	0.000643103	0.000162468	4662	tags=49%, list=16%, signal=41%	C1S/IFI44L/IFI44/LGALS3BP/IFIT3/SAMD9L/UBE2L6/IFITM2/CASP8/IFITM3/IFIT2/IFI35/B2M/PSMB8/CASP1/SP110/LAP3/UBA7/NMI/PROCR/IFI27/CSF1/OASL/IRF9/ISG15/IFITM1/PSMB9/EPSTI1/TRIM21/IFI30/PNPT1/PSME2/BST2/HELZ2/PSME1/HLA-C/DDX60/USP18/OGFR/TRIM14/MOV10/TAP1/RNF31/IRF1/CD47/TENT5A/PARP12
HALLMARK_TNFA_SIGNALING_VIA_NFKB	197	0.519677	2.10022	0.000281215	0.000643103	0.000162468	3377	tags=43%, list=12%, signal=38%	KYNU/CDKN1A/SQSTM1/IL7R/TNFSF9/SOD2/BIRC3/PLK2/AREG/IL1A/IL1B/ZC3H12A/NFIL3/SLC2A6/GADD45A/TNFAIP6/ICAM1/TNIP1/IL15RA/SAT1/TNC/CCND1/CXCL1/ICOSLG/GFPT2/PDE4B/ATF3/CD83/CXCL2/VEGFA/DENND5A/CCL20/IFIT2/LDLR/F3/PLAU/FOS/DNAJB4/CXCL3/TNFAIP3/SOCS3/PTGS2/DUSP4/GEM/PHLDA2/LIF/IER2/NFKB2/RELB/FOSL1/DUSP2/PLAUR/PHLDA1/PFKFB3/PTX3/YRDC/IER5/DUSP1/FOSB/TNFRSF9/JUN/SERPINB2/CSF1/IER3/NR4A1/PDLIM5/SERPINB8/D…
HALLMARK_XENOBIOTIC_METABOLISM	187	0.516865	2.07595	0.00027933	0.000643103	0.000162468	3104	tags=37%, list=11%, signal=34%	CFB/HMOX1/ABCC2/ATOH8/PROS1/KYNU/AKR1C2/AKR1C3/PAPSS2/PTGR1/AOX1/UGDH/GSR/IL1R1/HSD11B1/NQO1/PGD/ACOX3/EPHX1/CES1/ABCC3/SSR3/PGRMC1/CBR1/GCNT2/VNN1/MAN1A1/ALDH9A1/AP4B1/ALAS1/DDAH2/ABHD6/TPST1/PYCR1/ELOVL5/TDO2/PTGES3/NFS1/PSMB10/SMOX/TNFRSF1A/AQP9/PTS/LONP1/TMEM97/GCLC/FAH/PDLIM5/ECH1/EPHA2/IGFBP4/SLC6A6/KARS/SLC22A1/DDC/CYP26A1/ADH5/CYB5A/GSS/ABCD2/FAS/SAR1B/ALDH3A1/ACO2/GSTO1/IDH1/ACOX2/CYP2J2…
HALLMARK_REACTIVE_OXYGEN_SPECIES_PATHWAY	49	0.625287	2.04309	0.000231	0.000643103	0.000162468	4770	tags=55%, list=17%, signal=46%	FTL/SOD2/SRXN1/GSR/NQO1/GLRX/TXNRD1/GPX3/LSP1/G6PD/GCLM/MGST1/PRNP/PRDX1/ERCC2/TXN/GCLC/GLRX2/PFKP/PRDX6/SELENOS/NDUFA6/STK25/LAMTOR5/ATOX1/EGLN2/NDUFS2
HALLMARK_DNA_REPAIR	150	0.512933	2.00674	0.000269324	0.000643103	0.000162468	5284	tags=43%, list=19%, signal=35%	HCLS1/TAF13/SDCBP/PDE4B/PNP/POLR3GL/ZWINT/ELOA/UMPS/NCBP2/NUDT9/ERCC1/TAF12/TYMS/GUK1/CLP1/ERCC2/SUPT5H/ERCC8/RRM2B/POLR1C/SEC61A1/TAF9/FEN1/ITPA/GTF2A2/POLB/ARL6IP1/SF3A3/BRF2/NT5C3A/ADRM1/GMPR2/NME1/NME3/POLR2G/POLR2K/UPF3B/ZNRD1/POLR2C/SNAPC4/NME4/POLE4/ALYREF/RFC3/POLR2I/TARBP2/USP11/POLR2D/POLR2H/IMPDH2/POLR2F/SNAPC5/GTF2H5/RBX1/SRSF6/POLD1/GTF2B/TK2/APRT/GTF2H1/POLR2E/DGUOK/EDF1/HPRT1
HALLMARK_INFLAMMATORY_RESPONSE	175	0.488068	1.94214	0.000276091	0.000643103	0.000162468	3625	tags=34%, list=13%, signal=30%	CDKN1A/ITGA5/ROS1/IL7R/PCDH7/CXCL8/TNFSF9/HAS2/CHST2/IL1A/IL1R1/IL1B/C3AR1/PVR/TNFAIP6/ICAM1/IL15RA/CSF3/HIF1A/ICOSLG/FPR1/PDE4B/CCL20/LDLR/F3/BEST1/IL18R1/EMP3/LIF/ITGB3/PLAUR/HRH1/NMI/TPBG/PTGIR/TNFRSF9/MEFV/AQP9/CSF1/IFITM1/ADORA2B/SPHK1/OSMR/ATP2B1/DCBLD2/ADRM1/NAMPT/PTGER4/BST2/CD14/HBEGF/SLC31A1/NLRP3/SELENOS/IRAK2/IFNGR2/FZD5/RGS16/TACR1/LYN
HALLMARK_IL6_JAK_STAT3_SIGNALING	74	0.515926	1.80871	0.000246366	0.000643103	0.000162468	4671	tags=47%, list=16%, signal=40%	HMOX1/IL1R1/IL1B/IL15RA/PDGFC/CXCL1/CXCL3/SOCS3/IL18R1/IL1R2/ITGB3/GRB2/SOCS1/STAT1/JUN/TNFRSF1A/CSF1/IRF9/PLA2G2A/HAX1/OSMR/PTPN1/FAS/CD14/TNFRSF21/BAK1/TNFRSF12A/IFNGR2/IL17RA/STAT3/IL6ST/EBI3/IRF1/IL10RB/LTB
HALLMARK_FATTY_ACID_METABOLISM	148	0.447378	1.74964	0.000266525	0.000643103	0.000162468	4914	tags=46%, list=17%, signal=38%	SLC22A5/UGDH/ME1/EPHX1/ENO2/UBE2L6/DECR1/UROS/CBR1/CRYZ/RDH11/ACSL4/VNN1/ALDH9A1/CCDC58/ACOT2/ACSL5/MGLL/ELOVL5/HCCS/REEP6/TDO2/LDHA/PTS/ECH1/ALDOA/CPOX/HSPH1/IDH3B/SUCLG2/IDI1/ADSL/ACSL1/ALDH3A1/ECHS1/HSP90AA1/ACO2/HMGCL/IDH1/GRHPR/SMS/ODC1/PRDX6/PDHA1/BCKDHB/DLST/PSME1/AOC3/GSTZ1/ACAT2/UROD/PTPRG/IDH3G/H2AFZ/SUCLA2/SDHA/HSD17B10/NTHL1/PDHB/MDH1/NBN/APEX1/ACAA1/SUCLG1/OSTC/METAP1/ACADVL/ERP29
HALLMARK_COMPLEMENT	183	0.43605	1.74796	0.000277393	0.000643103	0.000162468	3028	tags=25%, list=11%, signal=22%	C3/CFB/CFH/SERPINA1/C1S/KYNU/ZEB1/S100A9/C1R/TIMP2/KCNIP3/COL4A2/ME1/FN1/MMP15/CD59/CXCL1/CTSO/F3/CASP4/TNFAIP3/CASP1/PLAUR/GRB2/LAP3/CTSB/LTF/SERPINB2/CALM3/HSPA1A/GNG2/DUSP5/PSMB9/PPP2CB/ERAP2/USP15/CASP7/ANXA5/ADAM9/PLAT/LIPA/PHEX/DOCK4/CD46/F8
HALLMARK_UV_RESPONSE_UP	151	0.433154	1.69591	0.000267666	0.000643103	0.000162468	3635	tags=40%, list=13%, signal=35%	HMOX1/SQSTM1/CDKN1C/SOD2/TFRC/NPTXR/ICAM1/DNAJA1/EPHX1/DLG4/ENO2/GPX3/ATF3/CXCL2/STIP1/CYB5R1/PPAT/DDX21/FOS/AMD1/PPP1R2/POLE3/GRPEL1/PPIF/POLG2/ALAS1/PARP2/YKT6/FOSB/HSPA13/TCHH/CCND3/NR4A1/HYAL2/CHKA/RAB27A/FEN1/PPT1/MGAT1/ALDOA/CHRNA5/SIGMAR1/SLC25A4/TARS/SHOX2/EIF5/CYB5B/NAT1/PRPF3/HTR7/GLS/H2AFX/BAK1/E2F5/AP2S1/UROD/PSMC3/BID/TYRO3/LYN/SPR
HALLMARK_ADIPOGENESIS	194	0.412257	1.66413	0.000280662	0.000643103	0.000162468	4405	tags=33%, list=15%, signal=28%	C3/GBE1/ME1/GADD45A/GPAM/GPX3/DECR1/RMDN3/NKIRAS1/SAMM50/SLC19A1/ANGPTL4/GRPEL1/DNAJB9/COL4A1/PGM1/CDKN2C/OMD/PFKFB3/MGLL/REEP6/ESRRA/YWHAG/TOB1/NABP1/CHCHD10/FAH/ECH1/ALDOA/COQ3/TALDO1/QDPR/SLC25A1/AK2/CYC1/PRDX3/ARL4A/ECHS1/ACO2/IDH1/GPAT4/PREB/COQ9/PPARG/UQCR11/CAVIN2/POR/SLC5A6/PPP1R15B/CMBL/ETFB/IDH3G/RNF11/ATP5PO/PEX14/MTCH2/NDUFS3/UBC/NMT1/IMMT/VEGFB/SLC25A10/PEMT/UQCRQ
HALLMARK_APOPTOSIS	156	0.409711	1.61416	0.000798085	0.00159617	0.000403243	2756	tags=29%, list=10%, signal=27%	DCN/HMOX1/CDKN1A/SQSTM1/DPYD/SOD2/BIRC3/PMAIP1/TIMP2/IL1A/GSR/IL1B/GADD45A/DNAJA1/SAT1/DAP/ENO2/CCND1/GPX3/CASP8/BNIP3L/IFITM3/ATF3/DFFA/F2R/CASP4/BAX/CASP1/VDAC2/BCL2L1/PLCB2/BGN/JUN/IER3/DIABLO/PPT1/PEA15/DAP3/MGMT/CASP7/FAS/RHOT2/FDXR/PLAT/CD14/TGFBR3
HALLMARK_COAGULATION	123	0.405072	1.53984	0.0054902	0.00946586	0.00239137	622	tags=15%, list=2%, signal=14%	C3/CFB/CFH/SERPINA1/C1S/PROS1/C1R/CFI/FBN1/F2RL2/PRSS23/FN1/MMP15/CAPN5/ARF4/CTSO/F3/PLAU
HALLMARK_PI3K_AKT_MTOR_SIGNALING	101	0.415577	1.53323	0.00790615	0.0127518	0.00322152	6344	tags=40%, list=22%, signal=31%	CDKN1A/RIT1/SQSTM1/DUSP3/AP2M1/DAPP1/EIF4E/PDK1/GRB2/AKT1S1/TNFRSF1A/MAP3K7/RIPK1/TRIB3/THEM4/NCK1/MAPKAP1/CAB39L/DDIT3/CDK1/TRAF2/YWHAB/CXCR4/SLA/PIN1/CALR/SFN/PIK3R3/TIAM1/RAC1/PFN1/RALB/PLCB1/MYD88/CLTC/UBE2N/ECSIT/PTEN/CSNK2B/NFKBIB
HALLMARK_E2F_TARGETS	200	0.360814	1.45988	0.00452745	0.00808473	0.00204246	4839	tags=36%, list=17%, signal=30%	CDKN1A/TFRC/AURKA/ASF1A/EIF2S1/MTHFD2/NOP56/CDC20/CDKN2C/KPNA2/TACC3/PSMC3IP/ANP32E/LYAR/PRPS1/EED/CKS2/HELLS/PNN/PHF5A/CTPS1/NOLC1/GINS3/AK2/PA2G4/UBE2S/LMNB1/KIF2C/TIPIN/SMC4/PAICS/NME1/H2AFX/DSCC1/POP7/GINS1/DONSON/POLE4/CDK1/H2AFZ/RFC3/TOP2A/CKS1B/SRSF2/RAN/DDX39A/EXOSC8/LUC7L3/SPAG5/GINS4/CHEK2/CENPM/RAD1/TUBB/UBE2T/NASP/CBX5/ORC6/SUV39H1/POLD2/NBN/JPT1/BIRC5/ORC2/HMGB3/PRKDC/TRA2B/RANBP1/RN…
HALLMARK_HEDGEHOG_SIGNALING	33	0.469611	1.40969	0.0648804	0.0811005	0.0204886	821	tags=18%, list=3%, signal=18%	RTN1/VLDLR/NRCAM/PML/VEGFA/NRP1
HALLMARK_UV_RESPONSE_DN	144	0.358884	1.39544	0.0207834	0.0296905	0.00750077	2978	tags=28%, list=10%, signal=25%	PTGFR/HAS2/VLDLR/PTPRM/MAP1B/INSIG1/FBLN5/LTBP1/ID1/LDLR/PLCB4/F3/DLC1/BDNF/SDC2/SLC22A18/AMPH/NRP1/ITGB3/MGLL/DUSP1/TGFBR2/IRS1/PDLIM5/PRKCE/ADORA2B/MMP16/MIOS/ATP2B1/TFPI/MT1E/CACNA1A/MGMT/DDAH1/EFEMP1/TGFBR3/LAMC1/PPARG/BCKDHB/ADGRL2
HALLMARK_ALLOGRAFT_REJECTION	162	0.351075	1.38546	0.017199	0.0268735	0.00678909	3706	tags=26%, list=13%, signal=23%	SRGN/HCLS1/IL27RA/IL1B/ICAM1/STAT4/HIF1A/ICOSLG/F2R/B2M/EIF3A/LIF/DEGS1/TAP2/SOCS1/RARS/STAT1/HLA-A/AARS/DYRK3/CCND3/PSMB10/CSF1/EIF3J/MAP3K7/GLMN/FLNA/FAS/CD7/BCL3/NME1/IL12A/NCK1/EIF3D/ABCE1/NLRP3/IFNGR2/HDAC9/EIF5A/TRAF2/LYN/RPL9
HALLMARK_PEROXISOME	100	0.375563	1.38265	0.0320692	0.0421964	0.0106601	2781	tags=28%, list=10%, signal=25%	SOD2/HSD3B7/DLG4/MVP/CLN8/RDH11/FADS1/ACSL4/ALDH9A1/SLC35B2/ERCC1/PRDX1/ACSL5/ELOVL5/ISOC1/CNBP/ECH1/CTPS1/SLC25A4/PEX2/IDI1/SLC25A17/ABCD2/SLC25A19/ACSL1/PEX5/HMGCL/IDH1
HALLMARK_P53_PATHWAY	198	0.332214	1.34432	0.019128	0.0289818	0.00732172	3776	tags=30%, list=13%, signal=26%	HMOX1/CDKN1A/OSGIN1/ALOX15B/TNFSF9/SLC7A11/PLK2/AEN/DNTTIP2/IL1A/GADD45A/MDM2/EPHX1/S100A4/SAT1/TM4SF1/ATF3/FOS/F2R/RPS27L/BAX/CASP1/NOL8/LIF/PLK3/PROCR/TRIAP1/IER5/SOCS1/TCHH/FAM162A/TOB1/JUN/CCND3/HIST1H1C/SEC61A1/IER3/EPHA2/ZMAT3/PVT1/IFI30/SPHK1/DDIT4/TRIB3/FAS/TGFA/FDXR/HBEGF/BAK1/FGF13/TSC22D1/ZFP36L1/RPS12/PRKAB1/DDIT3/RGS16/TSPYL2/NUDT15/RRP8/LRMP
HALLMARK_IL2_STAT5_SIGNALING	189	0.333066	1.34023	0.0206993	0.0296905	0.00750077	2799	tags=25%, list=10%, signal=23%	SLC39A8/CDKN1C/TGM2/F2RL2/P4HA1/MUC1/NFIL3/PNP/IFITM3/CD83/IL1RL1/DENND5A/XBP1/UMPS/BATF3/NOP2/NRP1/HK2/IL18R1/PTRH2/WLS/LIF/IL1R2/PRAF2/BCL2L1/PHLDA1/PRNP/PUS1/EEF1AKMT1/CKAP4/SOCS1/GLIPR2/TNFRSF9/SPRY4/CCND3/CSF1/FAH/ADAM19/HIPK2/EOMES/PDCD2L/GUCY1B1/ARL4A/GSTO1/TNFRSF21/ENPP1/ODC1
HALLMARK_G2M_CHECKPOINT	198	0.322972	1.30693	0.028692	0.0387968	0.0098013	5008	tags=33%, list=18%, signal=27%	PML/CCND1/HIF1A/HSPA8/HIST1H2BK/E2F3/AURKA/ATF5/AMD1/EGF/CDC20/KIF5B/CDKN2C/KPNA2/TOP1/TACC3/SAP30/BUB3/DKC1/CKS2/PRMT5/PBK/ODF2/HIRA/NOLC1/TPX2/MAP3K20/UBE2S/RBM14/LMNB1/PRC1/MARCKS/KIF2C/SMC4/BCL3/ODC1/H2AFX/G3BP1/CDK1/CUL3/H2AFZ/TOP2A/CKS1B/SRSF2/DDX39A/SRSF10/KIF20B/SFPQ/E2F4/NASP/ORC6/SUV39H1/CUL4A/JPT1/UBE2C/BIRC5/HMGB3/DTYMK/TRA2B/MEIS2/CDC7/NDC80/HNRNPD/SNRPD1/DBF4
HALLMARK_CHOLESTEROL_HOMEOSTASIS	73	0.337882	1.18342	0.166218	0.184687	0.0466576	3107	tags=29%, list=11%, signal=26%	ALDOC/NFIL3/ATF3/FABP5/LDLR/ATF5/CBS/GPX8/PLAUR/TMEM97/CHKA/ANTXR2/ECH1/PCYT2/IDI1/TRIB3/ANXA5/MVD/PPARG/TNFRSF12A/ACAT2
HALLMARK_ANGIOGENESIS	33	0.381387	1.14485	0.255757	0.277997	0.0702308	821	tags=24%, list=3%, signal=24%	STC1/FGFR1/S100A4/VEGFA/SERPINA5/FSTL1/SLCO2A1/NRP1
HALLMARK_BILE_ACID_METABOLISM	104	0.292432	1.08291	0.278308	0.296072	0.0747972	3175	tags=22%, list=11%, signal=20%	HSD3B7/ABCA6/AR/FADS1/SLC22A18/GCLM/ALDH9A1/SLC35B2/BMP6/ACSL5/ISOC1/AQP9/IDI1/PECR/ABCD2/DIO2/BCAR3/ACSL1/FDXR/SLC27A5/IDH1/KLF1/PEX16
HALLMARK_PANCREAS_BETA_CELLS	29	0.355897	1.03983	0.390185	0.406443	0.10268	6211	tags=38%, list=22%, signal=30%	MAFB/FOXO1/STXBP1/SRPRB/ISL1/PKLR/SEC11A/SPCS1/SRP9/PCSK1/SRP14
HALLMARK_PROTEIN_SECRETION	94	0.276192	1.00543	0.435852	0.444747	0.112357	3305	tags=19%, list=12%, signal=17%	BNIP3/PAM/GOSR2/AP2M1/SEC22B/GLA/VAMP3/YKT6/COPB1/ANP32E/TMX1/PPT1/CLTA/RER1/SCAMP3/GNAS/AP2S1/CLN5
HALLMARK_TGF_BETA_SIGNALING	52	-0.282607	-0.880387	0.659997	0.659997	0.166736	5780	tags=35%, list=20%, signal=28%	BMPR2/NOG/SMURF1/SKI/TRIM33/BMPR1A/SMAD7/SMAD1/TGFBR1/SMAD6/SMURF2/TJP1/ID3/SERPINE1/SMAD3/FURIN/PPM1A/CDH1
HALLMARK_HEME_METABOLISM	185	-0.309113	-1.15745	0.163281	0.184687	0.0466576	4263	tags=29%, list=15%, signal=25%	DCUN1D1/KDM7A/ALDH6A1/FBXO9/CAST/KEL/FBXO7/FBXO34/MPP1/IGSF3/EPB41/DCAF10/NFE2L1/ADD2/XPO7/TCEA1/DMTN/CAT/CIR1/NR3C1/RIOK3/NEK7/TNRC6B/HAGH/SLC2A1/FOXJ2/BTRC/XK/ENDOD1/KLF3/TMCC2/CA2/MKRN1/BCAM/LRP10/MARCH8/EZH1/ADIPOR1/MXI1/LAMP2/CCDC28A/TFDP2/PC/ANK1/BTG2/DCAF11/YPEL5/E2F2/KHNYN/SLC6A9/H1F0/OSBP2/DAAM1/AQP3
HALLMARK_MITOTIC_SPINDLE	199	-0.322126	-1.21497	0.0994586	0.121291	0.0306419	4816	tags=29%, list=17%, signal=24%	NF1/ARHGEF12/MARK4/TSC1/TTK/ARHGEF7/ARHGEF11/WASF1/KIF1B/ECT2/SSH2/SMC3/ALMS1/DOCK2/ARFGEF1/EPB41/CD2AP/BCL2L11/INCENP/CYTH2/CEP57/CLIP1/WASL/MID1/SOS1/AKAP13/CCNB2/ARHGAP29/ARL8A/SASS6/DYNLL2/CLASP1/NET1/SUN2/STK38L/RICTOR/KNTC1/ABI1/ESPL1/TRIO/KIFAP3/ARHGEF3/FGD4/LLGL1/NUMA1/WASF2/CDC42EP4/CLIP2/SHROOM2/SMC1A/CNTRL/RAPGEF5/RABGAP1/PCGF5/RHOF/KIF3C/GSN/DST
HALLMARK_ANDROGEN_RESPONSE	97	-0.354611	-1.22311	0.137523	0.15991	0.0403983	2410	tags=22%, list=8%, signal=20%	STK39/CDC14B/TPD52/ANKH/NDRG1/MAF/ZBTB10/UBE2J1/INPP4B/TNFAIP8/GPD1L/HOMER2/ZMIZ1/ARID5B/PTK2B/SLC38A2/MAP7/AKAP12/ALDH1A3/H1F0/SGK1
HALLMARK_SPERMATOGENESIS	108	-0.380709	-1.33439	0.0569476	0.0730098	0.0184446	5466	tags=29%, list=19%, signal=23%	PCSK4/CSNK2A2/TNNI3/ACRBP/NCAPH/MAST2/ADCYAP1/BRAF/TTK/CHFR/SLC2A5/ACE/PACRG/GFI1/PHF7/HSPA4L/MLLT10/SIRT1/ZC2HC1C/CCNB2/PCSK1N/YBX2/SNAP91/TLE4/DMC1/MAP7/THEG/CCNA1/CLGN/JAM3/IP6K1
HALLMARK_KRAS_SIGNALING_UP	186	-0.359578	-1.34727	0.0287096	0.0387968	0.0098013	1896	tags=21%, list=7%, signal=20%	AKT2/ANKH/EPB41L3/CA2/ITGA2/RBP4/ANXA10/PCSK1N/ETV4/MTMR10/IL2RG/ZNF277/FUCA1/TSPAN13/ADAM8/SNAP91/SATB1/CCND2/CBR4/SPON1/TMEM176B/EPHB2/APOD/CROT/MAP7/AKAP12/KLF4/CPE/ALDH1A3/GALNT3/SEMA3B/F2RL1/TSPAN1/VWA5A/MMP9/MPZL2/ANO1/JUP/MMP10
HALLMARK_NOTCH_SIGNALING	30	-0.483519	-1.35418	0.102841	0.12243	0.0309298	3222	tags=43%, list=11%, signal=38%	DTX1/FBXW11/ARRB1/FZD7/MAML2/PPARD/NOTCH1/FZD1/TCF7L2/NOTCH3/DLL1/DTX4/LFNG
HALLMARK_MYOGENESIS	180	-0.402417	-1.50395	0.00390992	0.00724058	0.0018292	2310	tags=18%, list=8%, signal=17%	PPP1R3C/ITGA7/TNNI2/SORBS1/NOTCH1/ACHE/AKT2/DMD/SORBS3/PDE4DIP/FOXO4/MAPRE3/PC/CLU/ITGB4/GNAO1/SPARC/CTF1/NAV2/PLXNB2/TNNI1/VIPR1/CHRNB1/GSN/APOD/NCAM1/COL6A3/HDAC5/EPHB3/COL6A2/ERBB3/RYR1/IGFBP7
HALLMARK_ESTROGEN_RESPONSE_EARLY	194	-0.413039	-1.55328	0.00124243	0.00238929	0.000603609	2279	tags=26%, list=8%, signal=24%	RET/MED13L/FRK/SLC2A1/TTC39A/GAB2/EGR3/INPP5F/DEPTOR/ENDOD1/KRT15/ABCA3/ELOVL2/SEC14L2/MAST4/CD44/SCNN1A/ELF1/GJA1/SYNGR1/ESRP2/ADCY1/MINDY1/KLK10/IGF1R/P2RY2/SLC27A2/ABAT/TIPARP/FCMR/PDZK1/SULT2B1/SLC1A4/ZNF185/NAV2/ELF3/KLF4/CLDN7/SLC7A5/RETREG1/MYB/RAPGEFL1/LAD1/TFAP2C/DHRS3/SEMA3B/CELSR2/OVOL2/HR/AQP3
HALLMARK_ESTROGEN_RESPONSE_LATE	188	-0.448912	-1.68396	0.000466999	0.000972914	0.000245789	1759	tags=28%, list=6%, signal=26%	MDK/OPN3/PRKAR2B/RET/SNX10/FRK/EGR3/KLK11/GPER1/CA2/ABCA3/PKP3/CD44/SCNN1A/ATP2B4/CAV1/MAPK13/TSPAN13/NAB2/KLK10/PLXNB1/SLC27A2/LLGL2/HOMER2/SLC29A1/CD9/PDZK1/SULT2B1/SLC1A4/FGFR3/GJB3/AGR2/ST14/KLF4/CCNA1/CPE/SLC7A5/PDCD4/CDH1/MYB/RAPGEFL1/EMP2/SGK1/TFAP2C/SEMA3B/TRIM29/CELSR2/ST6GALNAC2/OVOL2/PERP/HR/TFPI2
HALLMARK_APICAL_SURFACE	42	-0.573038	-1.71314	0.00568889	0.00948148	0.00239532	1640	tags=26%, list=6%, signal=25%	CRYBG1/HSPB1/GAS1/IL2RG/SHROOM2/GATA3/RTN4RL1/ATP8B1/LYPD3/SULF2/AFAP1L2
HALLMARK_WNT_BETA_CATENIN_SIGNALING	40	-0.654145	-1.93628	0.000359906	0.000782405	0.00019766	3013	tags=50%, list=11%, signal=45%	DVL2/NUMB/CUL1/AXIN1/SKP2/PTCH1/TP53/MAML1/CSNK1E/WNT6/PPARD/NOTCH1/FZD1/TCF7/DLL1/CCND2/JAG2/WNT5B/FRAT1/HDAC5
HALLMARK_APICAL_JUNCTION	192	-0.52778	-1.98348	0.000155255	0.000643103	0.000162468	2640	tags=27%, list=9%, signal=25%	LAMB3/MDK/CTNNA1/NECTIN1/CNN2/CTNND1/CLDN9/TJP1/AKT2/AKT3/ITGA2/PARD6G/THBS3/SORBS3/SYK/EGFR/PTK2/MAPK13/LDLRAP1/SHROOM2/ACTG1/CRB3/SIRPA/RHOF/CD99/SRC/ITGB4/LAMA3/NECTIN4/COL16A1/COL17A1/PPP2R2C/ARHGEF6/CLDN7/MMP2/DSC3/JAM3/CDH1/CDH3/NEXN/FYB1/NFASC/LIMA1/CD86/GRB7/MMP9/MPZL2/PCDH1/CLDN4/FLNC/JUP/VCAN
HALLMARK_KRAS_SIGNALING_DN	159	-0.554404	-2.03882	0.000159261	0.000643103	0.000162468	2509	tags=30%, list=9%, signal=27%	STAG3/ZC2HC1C/C5/TENM2/PLAG1/SCGB1A1/SNCB/RYR2/HTR1D/KRT15/YPEL1/PRODH/PDK2/COL2A1/TFCP2L1/CPEB3/YBX2/DTNB/NR6A1/GPR19/MX1/COQ8A/BTG2/NR4A2/KLK7/MYOT/LGALS7/KLK8/FGFR3/THNSL2/ZBTB16/TCF7L1/MFSD6/CCNA1/IGFBP2/RIBC2/SNN/DLK2/H2AFY2/LYPD3/GPRC5C/SGK1/CELSR2/LFNG/SLC29A3/NUDT11/RYR1

## Sheet: MCF10A_c2_PI3K_Activation
Description	setSize	enrichmentScore	NES	pvalue	p.adjust	qvalues	rank	leading_edge	core_enrichment
MANALO_HYPOXIA_DN	290	0.608223	2.55644	0.000317763	0.00296587	0.00166199	5008	tags=55%, list=18%, signal=46%	FAM136A/SLCO4A1/UTP14A/POLR3G/BYSL/TOE1/ID1/PFAS/RRS1/GRWD1/GNPDA1/RRP1/COA7/ZWINT/VARS/PAK1IP1/PPAT/DDX21/UMPS/NAT10/PNO1/EIF2S1/SCLY/TSR1/NCLN/HEATR3/WDR12/NOP56/NOP16/CUTC/SLC19A1/RRP9/RRP15/PPIF/NLE1/PSME3/GTPBP4/NOL11/SHCBP1/PUM3/PARP2/PWP2/PUS1/CD3EAP/TOR3A/SLC25A15/PSMC3IP/NDUFAF4/SEH1L/CIAO1/WDR74/METTL2B/AIMP2/RSAD1/DKC1/PRPS1/LRP8/PRMT5/SRRT/LBHD1/PBK/WDR4/EXOSC2/EMG1/FEN1/POLR3K/NOL12/…
REACTOME_RRNA_MODIFICATION_IN_THE_NUCLEUS_AND_CYTOSOL	60	0.755497	2.55139	0.000243309	0.00296587	0.00166199	4672	tags=73%, list=16%, signal=61%	PDCD11/UTP14A/NOP58/NOL6/NAT10/PNO1/UTP15/DCAF13/NOP56/DHX37/NOP2/RRP9/UTP18/UTP3/NOL11/RRP36/PWP2/BMS1/IMP4/UTP11/DDX47/MPHOSPH10/DKC1/WDR43/WDR3/EMG1/RCL1/GAR1/BUD23/WDR46/UTP6/UTP4/RRP7A/TBL3/KRR1/UTP25/NOP14/NOP10/DDX49/TRMT112/NOC4L/TSR3/THUMPD1/IMP3
REACTOME_COMPLEMENT_CASCADE	46	0.790078	2.53072	0.000237756	0.00296587	0.00166199	352	tags=22%, list=1%, signal=22%	C3/CFB/CFH/C1S/PROS1/C1R/CFI/C5AR2/C3AR1/CD59
REACTOME_MITOCHONDRIAL_TRANSLATION	96	0.684778	2.51291	0.000255885	0.00296587	0.00166199	6607	tags=77%, list=23%, signal=59%	MRPL42/MRPS30/MRPS25/MRPS23/MRPS18C/MRPS10/MRPL35/MRPL32/MRPL21/DAP3/MRPL50/MRPL41/MRPL1/MRPL18/MRPS5/MRPL52/MRPL20/MRPL46/MRPS17/MRPS12/TUFM/MRPS35/MRPL9/MRPL34/GFM1/MRPS22/MRPS33/TSFM/MRPS11/MRPL47/MRPL16/MRPL17/MRPS14/MRPS16/GFM2/MRPL55/MRPL28/MRPL22/MRPL39/MRPS28/MRPS2/MRPL12/MRPL58/MRPS9/MRPL54/MRPL44/MRPS18A/MRPL14/MRPL2/MRPS7/MRPL33/MRPL24/MRPL27/MRPL11/AURKAIP1/MRPS21/MRPS34/MRPL57/MRPL15…
HARRIS_HYPOXIA	77	0.702458	2.4845	0.000251256	0.00296587	0.00166199	1792	tags=47%, list=6%, signal=44%	IGFBP3/HMOX1/VIM/CDKN1A/CA9/STC1/CXCL8/FTL/TGM2/P4HA1/TFRC/BNIP3/EDN2/TAGLN/SAT1/HIF1A/GAPDH/BNIP3L/VEGFA/PGF/F3/FOS/PTGS2/HK2/PGK1/PLAUR/ENO1/PKM/TXN/JUN/PRPS1/LDHA/LRP8/RP1/HK1/ALDOA
REACTOME_RRNA_PROCESSING	202	0.605954	2.45867	0.000284414	0.00296587	0.00166199	6935	tags=66%, list=24%, signal=50%	PDCD11/UTP14A/NIP7/NOP58/FTSJ3/BYSL/RIOK2/RRP1/NOL6/LTV1/DDX21/NAT10/RPS27L/PNO1/UTP15/DCAF13/TSR1/WDR12/NOP56/RIOK1/DHX37/NOP2/RRP9/TEX10/UTP18/UTP3/ISG20L2/NOL11/RRP36/NOL9/PWP2/NSUN4/BMS1/IMP4/UTP11/DDX47/NOB1/MPHOSPH10/EXOSC4/DKC1/MRM3/EXOSC9/WDR43/EXOSC2/WDR3/EMG1/RCL1/NOL12/RPP40/RPP38/RPP14/GAR1/TRMT10C/MRM2/RBM28/BUD23/WDR46/LAS1L/UTP6/UTP4/GNL3/EXOSC3/CSNK1D/ERI1/SENP3/RRP7A/EBNA1BP2/WDR…
LIANG_SILENCED_BY_METHYLATION_2	52	0.746048	2.45539	0.00023753	0.00296587	0.00166199	1489	tags=44%, list=5%, signal=42%	C3/C1S/IFI44L/IFI44/SAA1/STC1/SOD2/IFIT3/HIST1H2AC/AREG/IFI6/IFIT1/ICAM1/S100A4/CXCL2/CCL20/IFIT2/TNFAIP3/PTGS2/SP100/IL13RA2/STAT1/SERPINB2
GARY_CD5_TARGETS_DN	431	0.560887	2.44952	0.00034965	0.00296587	0.00166199	5201	tags=54%, list=18%, signal=45%	SOD2/UGDH/DNTTIP2/TFRC/GBP1/GPATCH4/SP140/IFIT1/DNAJA1/IKBIP/NOP58/UFM1/POLR3G/BAG2/PPIL1/FOXO1/MGAT2/EEF1AKNMT/RAB29/PNP/STIP1/ZWINT/IFI35/PAK1IP1/CCT6A/ELOA/DNAJB4/UMPS/CRYZ/FARSA/PNO1/EIF2S1/TWISTNB/UTP15/CHORDC1/FASTKD2/TDG/BCCIP/NOP56/AMD1/PSMC5/CSTF2/CASP1/SAMM50/NOP2/RRP9/RRP15/GNL3L/POLE3/UTP3/AP4B1/TXNDC9/TM2D2/TWNK/GTPBP4/CEBPZ/DRG1/NOL11/DLEU1/MRPS23/GTF2H2/PUM3/KIAA1586/QRSL1/APTX/FLA…
YAO_TEMPORAL_RESPONSE_TO_PROGESTERONE_CLUSTER_11	99	0.664378	2.44807	0.000257202	0.00296587	0.00166199	3061	tags=49%, list=11%, signal=44%	AREG/TFRC/NOP58/MYRF/FTSJ3/BYSL/RIPOR2/HIF1A/NIFK/RRS1/METTL1/STIP1/LTV1/DDX21/PNO1/TSR1/PPAN/NOP56/AMD1/PSME3/TIMM8A/IL13RA2/PUM3/KPNA2/BMS1/PUS1/MAK16/NDUFAF4/AARS/BECN1/SEPT4/SEC23B/SRRT/TAF9/SRSF3/MRTO4/PELO/DDX51/TARS/SRM/ADH5/PA2G4/UTP4/GNL3/TNFRSF21/USP39/ABCE1/EPRS/SELENOS
DER_IFN_GAMMA_RESPONSE_UP	69	0.704876	2.44766	0.000246792	0.00296587	0.00166199	4089	tags=62%, list=14%, signal=54%	PLOD2/C1S/PMAIP1/IFIT3/GBP1/ICAM1/PML/IL15RA/SDCBP/CASP8/IFIT2/IFI35/B2M/PSMB8/SP110/PPP5C/FOSL1/NMI/ATP6V0B/STAT1/HLA-A/CYCS/PSMB10/ZFP36L2/IRF9/ISG15/IFITM1/PSMB9/TRIM21/IFI30/EIF2B1/VEGFC/FAS/BST2/RHOC/BAK1/PSME1/HLA-C/SSBP1/SRSF2/IFI16/SKP1/TAP1
REACTOME_RRNA_PROCESSING_IN_THE_NUCLEUS_AND_CYTOSOL	190	0.606743	2.43739	0.000282566	0.00296587	0.00166199	6935	tags=66%, list=24%, signal=51%	PDCD11/UTP14A/NIP7/NOP58/FTSJ3/BYSL/RIOK2/RRP1/NOL6/LTV1/DDX21/NAT10/RPS27L/PNO1/UTP15/DCAF13/TSR1/WDR12/NOP56/RIOK1/DHX37/NOP2/RRP9/TEX10/UTP18/UTP3/ISG20L2/NOL11/RRP36/NOL9/PWP2/BMS1/IMP4/UTP11/DDX47/NOB1/MPHOSPH10/EXOSC4/DKC1/EXOSC9/WDR43/EXOSC2/WDR3/EMG1/RCL1/NOL12/RPP40/RPP38/RPP14/GAR1/RBM28/BUD23/WDR46/LAS1L/UTP6/UTP4/GNL3/EXOSC3/CSNK1D/ERI1/SENP3/RRP7A/EBNA1BP2/WDR18/PES1/TBL3/RPS12/KRR1/…
NAKAYAMA_SOFT_TISSUE_TUMORS_PCA1_UP	64	0.710748	2.43383	0.000244559	0.00296587	0.00166199	2730	tags=34%, list=10%, signal=31%	C3/DCN/CFB/CFH/SERPINA1/C1S/KYNU/IFI44L/MME/APOL1/TNFAIP6/S100A4/FAP/NCKAP1L/CCN5/NNMT/S100A6/SLAMF8/IFI30/HSPA6/EFEMP1/CD14
KEGG_COMPLEMENT_AND_COAGULATION_CASCADES	57	0.726759	2.43302	0.000242307	0.00296587	0.00166199	3028	tags=39%, list=11%, signal=35%	C3/CFB/CFH/SERPINA1/C1S/PROS1/C1R/CFI/C3AR1/CD59/SERPINA5/F3/PLAU/F2R/PLAUR/CFD/THBD/TFPI/C4A/PLAT/CD46/F8
DER_IFN_ALPHA_RESPONSE_UP	73	0.682084	2.3922	0.000248756	0.00296587	0.00166199	3872	tags=59%, list=14%, signal=51%	PLOD2/C1S/IFI44/PMAIP1/IFIT3/IFI6/GBP1/IFIT1/PML/SDCBP/CASP8/TRIM22/IFI35/B2M/PSMB8/SP110/NMI/ATP6V0B/STAT1/HLA-A/CYCS/PSMB10/ZFP36L2/OASL/IRF9/ISG15/IFITM1/PSMB9/TRIM21/IFI30/EIF2B1/VEGFC/FAS/BST2/LIPA/RHOC/PSME1/HLA-C/SSBP1/SRSF2/TRIM14/IFI16/SKP1
KRASNOSELSKAYA_ILF3_TARGETS_UP	35	0.782712	2.38266	0.000229148	0.00296587	0.00166199	1903	tags=57%, list=7%, signal=53%	CFH/PROS1/IFIT3/HIST1H2AC/IFI6/IFIT1/FAP/CTSO/TRIM22/IFI35/PLAU/OMD/IFI27/BLZF1/STAT1/HIST1H1C/ISG15/IFITM1/CLEC2B/PSMB9
HIRSCH_CELLULAR_TRANSFORMATION_SIGNATURE_UP	242	0.576398	2.38164	0.000304136	0.00296587	0.00166199	3462	tags=40%, list=12%, signal=35%	CFH/SERPINA1/C1S/SERPINE2/PROS1/CA9/MME/LOX/STC1/SLC39A8/C1R/ADGRE5/ALDOC/SOD2/PAPPA/PMAIP1/TNFRSF6B/SLCO4A1/IFRD1/IL1A/P4HA1/BNIP3/IL1R1/GLRX/IL1B/PLOD1/HEXA/IL15RA/SAT1/CSF3/HIF1A/PDE4B/RAB29/PNP/TM4SF1/UAP1/VEGFA/IFI35/PLAU/TOR4A/SNAPC1/CASP4/CXCL3/SOCS3/SIGIRR/ZNF200/ITPKA/LYRM1/IER2/ARHGEF2/FOSL1/ALAS1/PLAUR/BCL2L1/SLC35G2/PHLDA1/PTX3/NMI/PROCR/KCNG1/DUSP1/MAK16/CTSB/FBXL5/GSDMD/DCTN6/EVI2B/…
WONG_MITOCHONDRIA_GENE_MODULE	215	0.582096	2.38132	0.000287356	0.00296587	0.00166199	6055	tags=60%, list=21%, signal=48%	SOD2/GSR/NQO1/SLC25A32/SLC25A22/SCO1/MRPL42/SLC16A3/MRPS30/DECR1/CRYZ/MTHFD2/SLC9A2/PTRH2/PPIF/NIPSNAP1/VDAC2/SCO2/HCCS/ATP6V1E1/NFS1/ATP5PD/DCTN6/MRPS18C/LONP1/DIABLO/MRPL32/ATP5F1B/ATP6V1D/KARS/DAP3/COX7A2L/COQ3/HAX1/NDUFB5/GATD3A/ATP5F1E/SLC25A17/MTX2/ATP5MC2/SLC25A1/MRPL18/TIMM10/CYB5A/AK2/CYC1/TIMM23/SLC25A19/VDAC3/GCAT/ECHS1/NDUFA8/MRPS17/ATP5MC1/FDXR/GSTO1/TFAM/TUFM/PDHA1/UQCR11/NDUFA12/GS…
LINDSTEDT_DENDRITIC_CELL_MATURATION_A	55	0.715501	2.37772	0.0002405	0.00296587	0.00166199	562	tags=33%, list=2%, signal=32%	RTN1/KYNU/TRIM16/IL7R/CXCL8/TNFSF9/SOD2/SLC7A11/IL1B/GBP1/TXNRD1/ICAM1/STAT4/TNC/CXCL1/CXCL2/CCL20/ATF5
KEGG_SPLICEOSOME	126	0.619957	2.36536	0.000264901	0.00296587	0.00166199	5620	tags=57%, list=20%, signal=46%	TCERG1/PPIL1/HSPA8/SRSF7/SF3B4/CHERP/NCBP2/PRPF4/PLRG1/PRPF38B/PRPF6/PQBP1/SRSF3/HSPA1A/ZMAT2/PHF5A/SF3A3/LSM6/THOC2/SNRNP27/RBM25/SMNDC1/PRPF3/THOC1/PPIE/HSPA6/U2SURP/SF3B3/RBM8A/SNRNP40/BCAS2/MAGOHB/PRPF38A/DDX23/USP39/PCBP1/TRA2A/CCDC12/PRPF40A/SNRPE/ALYREF/SART1/SRSF2/SNRPC/SNRPB2/U2AF2/SRSF10/EIF4A3/SNRPA1/ISY1/SRSF9/PRPF31/CWC15/TXNL4A/BUD31/PUF60/HSPA1B/SRSF6/TRA2B/HNRNPM/SF3B2/SNW1/SNRPD1…
SANA_RESPONSE_TO_IFNG_UP	64	0.683086	2.3391	0.000244559	0.00296587	0.00166199	1874	tags=41%, list=7%, signal=38%	CFH/C1S/IFI44L/LGALS3BP/MLKL/APOL2/APOL1/GBP1/ATP6V0A4/SAMD9L/UBE2L6/APOL3/TRIM22/IFI35/GOLM1/CASP1/RAC3/GBP3/HLA-B/LGALS9/LAP3/NLRC5/STAT1/HLA-A/SEPT4/DTX3L
SANA_TNF_SIGNALING_UP	77	0.66059	2.33642	0.000251256	0.00296587	0.00166199	1562	tags=40%, list=5%, signal=38%	C1S/IFI44L/LGALS3BP/IL7R/CXCL8/SOD2/BIRC3/PDGFRL/IL32/APOL1/GBP1/FTH1/IFIT1/ICAM1/DNAJA1/TNIP1/SAMD9L/SAT1/ICOSLG/APOL3/CXCL2/CCL20/CXCL3/TNFAIP3/CASP1/RAC3/HLA-B/LGALS9/HLA-A/CSF1/C1QTNF1
HSIAO_LIVER_SPECIFIC_GENES	209	0.572703	2.33264	0.000288434	0.00296587	0.00166199	3104	tags=25%, list=11%, signal=22%	C3/CFB/CFH/PLOD2/ABCC2/SERPINA1/CDH2/C1S/PROS1/KYNU/AKR1C1/SAA1/SERPINA3/C1R/PTGR1/CFI/AOX1/HSD11B1/EPHX1/CES1/SERPINA5/DECR1/PGRMC1/CBS/RIDA/FGL1/SLC39A14/ALAS1/SORD/MGST1/FGFR4/ASS1/TDO2/NNMT/FAH/PON3/GGCX/SELENOP/RBM4/TFPI/CYB5A/NAMPT/C4A/ACSL1/MSMO1/GSTO1/HMGCL/ACOX2/GSTA2/CYP2J2/GSTZ1/POR
DER_IFN_BETA_RESPONSE_UP	102	0.625985	2.31892	0.000258065	0.00296587	0.00166199	3872	tags=52%, list=14%, signal=45%	PLOD2/C1S/IFI44/PMAIP1/IFIT3/IFI6/GBP1/MAP1B/IFIT1/PML/HIF1A/DNAJC2/CASP8/IFIT2/TRIM22/IFI35/DDX21/B2M/PSMB8/EIF3A/SP110/PPP5C/FOSL1/PLAUR/NMI/ATP6V0B/STAT1/HLA-A/CYCS/PSMB10/ZFP36L2/OASL/IRF9/ISG15/IFITM1/PSMB9/TRIM21/IFI30/DDX1/CTR9/EIF2B1/BST2/ADAM9/LIPA/RHOC/EPRS/PSME1/HLA-C/SSBP1/SRSF2/TRIM14/IFI16/SKP1
SCHUHMACHER_MYC_TARGETS_UP	80	0.647557	2.30432	0.00025355	0.00296587	0.00166199	4985	tags=62%, list=18%, signal=52%	TFRC/RRS1/FABP5/VARS/PPAT/DDX21/PNO1/DDX10/CEBPZ/SLC39A14/PUM3/SORD/MGST1/PYCR1/CYCS/AIMP2/LDHA/TMEM97/LRP8/EXOSC2/DHODH/CTPS1/RPIA/RABEPK/NOLC1/SRM/NAMPT/ACSL1/PAICS/NME1/ODC1/ABCE1/EBNA1BP2/TBL3/ZNF239/DCUN1D4/HSPE1/RCC1/MEST/TARBP1/POLD2/SLC20A1/SLC16A1/POLR2H/IMPDH2/RANBP1/BOP1/FXN/GCSH/RRP1B
YAO_TEMPORAL_RESPONSE_TO_PROGESTERONE_CLUSTER_13	168	0.58069	2.29922	0.000279564	0.00296587	0.00166199	7270	tags=64%, list=26%, signal=48%	GSR/PSAT1/SMTN/CES1/CCND1/NCBP2/ANAPC13/POLE3/CYBA/SLC35B2/RELB/COA6/HDDC2/GUK1/FAM49B/PQBP1/SELENOF/TAF9/ECH1/PSMA6/MRPL35/S100A6/LYRM2/POLR3K/ACYP2/CUEDC2/DAP3/NUDT16L1/GTF2A2/GPN1/NDUFB5/ATP5F1E/MRPL18/PSME2/PSMA5/SNRNP27/CD320/CYB5B/COMMD1/RBM14/MRPL52/HNRNPL/UBL5/TMEM205/RBM3/HNRNPH2/UQCR11/NDUFA9/MRPS33/IFNGR2/ETFB/LAGE3/NDUFV3/H2AFZ/ATP5MD/OGFR/MRPL28/COX16/TIMM8B/ATP5PO/NEDD8/C9orf78/NDUF…
REACTOME_MRNA_SPLICING	188	0.571064	2.29426	0.000281215	0.00296587	0.00166199	5860	tags=54%, list=21%, signal=43%	PPIL1/HSPA8/SRSF7/SRRM1/SF3B4/CHERP/NCBP2/CSTF2/PRPF4/PLRG1/SNRPN/CLP1/PRPF6/PQBP1/SRRT/SRSF3/FIP1L1/PHF5A/FUS/SF3A3/LSM6/GCFC2/SNRNP27/SMNDC1/PRPF3/PPIE/U2SURP/HNRNPL/SF3B3/RBM8A/SNRNP40/CCAR1/PPIL3/BCAS2/MAGOHB/PRPF38A/DDX23/HNRNPH2/SYMPK/USP39/PCBP1/POLR2G/POLR2K/UPF3B/CD2BP2/DNAJC8/POLR2C/ZMAT5/PRPF40A/SNRPE/U2AF1L4/ALYREF/SART1/SRSF2/POLR2L/SNRPC/SNRPB2/U2AF2/SRSF10/EIF4A3/SNRPA1/POLR2I/ISY1…
WIELAND_UP_BY_HBV_INFECTION	85	0.634935	2.28677	0.000252972	0.00296587	0.00166199	2704	tags=40%, list=9%, signal=36%	SRGN/LAPTM5/SOD2/C3AR1/GBP1/UBE2L6/APOL3/RGL1/CD83/AURKA/TRIM22/B2M/SP110/HLA-B/KPNA2/LAP3/RAB31/TYMS/CTSB/IFI27/STAT1/HLA-A/PSMB10/RAB27A/PBK/PPT1/DENND2D/COTL1/PSMB9/ARHGDIB/IFI30/PSME2/PRC1/BTN3A3
REACTOME_TRNA_MODIFICATION_IN_THE_NUCLEUS_AND_CYTOSOL	43	0.719545	2.28163	0.000235018	0.00296587	0.00166199	4995	tags=74%, list=18%, signal=61%	TRMT6/METTL1/TYW3/NSUN2/TRMT61A/PUS1/TRMT1/TP53RK/TYW5/TYW1/WDR4/PUS3/THADA/DUS2/CTU2/TRIT1/TRMT11/EPRS/QTRT1/LAGE3/TRDMT1/URM1/FTSJ1/CTU1/TRMT112/TRMT44/TRMT10A/ADAT2/TPRKB/TRMT12/TRMT13/TRMT5
KIM_LRRC3B_TARGETS	27	0.790997	2.28066	0.000224065	0.00296587	0.00166199	4089	tags=63%, list=14%, signal=54%	SERPINA1/IFI44/FTH1/IFIT1/CD59/IFITM2/CXCL1/B2M/HLA-B/IFI27/HLA-A/ISG15/PSME2/HLA-C/EIF3E/IFI16/TAP1
WINNEPENNINCKX_MELANOMA_METASTASIS_UP	161	0.577901	2.27527	0.000277778	0.00296587	0.00166199	5196	tags=52%, list=18%, signal=42%	PLOD2/FERMT2/FAM216A/C8orf33/DNAJA1/NEIL3/ARF4/SSR3/AURKA/ZWINT/DPH3/CHORDC1/TAF1A/SGO2/IWS1/SHCBP1/KPNA2/TYMS/PSMC3IP/PRPF38B/HSPD1/SRP19/CCT5/HSPA4/CKS2/OGG1/MRPS10/MRPL32/GLRX2/VMA21/CCT4/TARS/MAP4K4/CREM/EEPD1/DCBLD2/MRPS5/CHTOP/UGGT1/PHF14/PRC1/KIF2C/MRPS17/CCT7/NUDCD1/CACYBP/PAICS/NME1/GEMIN6/DSCC1/MTERF3/CNN3/DONSON/PWP1/MRPS16/FAM98A/CDK1/TOP2A/CKS1B/SRSF10/SPAG5/PARPBP/UBE2T/NASP/PCLAF/S…
BOYAULT_LIVER_CANCER_SUBCLASS_G3_UP	189	0.565523	2.27133	0.000282486	0.00296587	0.00166199	4820	tags=48%, list=17%, signal=40%	PLOD2/RIT1/MED24/MPV17/PGD/FTH1/CCDC86/DUSP3/UBE2V2/MAPRE1/MRPL42/EMC1/SLC16A3/PAK1IP1/EIF2S1/G6PD/TDG/WDR12/PHLDA2/GLA/NSF/UTP18/NGRN/PGK1/SLC38A6/WDR45B/TPD52L2/NLE1/PSME3/NOL11/CCT2/TACC3/SMG8/AIMP1/ENO1/ANP32E/TXN/PTGES3/TMX1/DKC1/CCT5/PRMT5/FAM50A/MRTO4/CCT4/PSMC4/EIF3B/LRP12/SLC52A2/GPN1/SRM/ATIC/RBM28/ELOC/PPP2R3C/ADSL/CYB5B/HIST2H2BE/NARS/MARCKS/SUB1/GNL3/KIF2C/TIPIN/CSNK1D/PHB/NME1/PSMD1…
REACTOME_MITOCHONDRIAL_PROTEIN_IMPORT	63	0.664472	2.26966	0.000243191	0.00296587	0.00166199	4883	tags=68%, list=17%, signal=57%	TIMM17A/TIMM10B/TIMM22/SAMM50/GRPEL1/TIMM8A/COA6/TIMM44/PMPCA/TOMM20/CHCHD3/PAM16/HSPD1/CHCHD10/TIMM21/TOMM5/ATP5F1B/SLC25A4/CHCHD4/MTX2/TIMM10/VDAC1/TIMM50/CYC1/TIMM23/COA4/ACO2/ATP5MC1/CMC2/GFER/MTX1/IDH3G/TOMM7/TIMM9/TIMM8B/TOMM70/BCS1L/TOMM6/CHCHD5/CHCHD7/FXN/NDUFB8/ATP5F1A
REACTOME_METABOLISM_OF_POLYAMINES	57	0.674038	2.25652	0.000242307	0.00296587	0.00166199	5167	tags=65%, list=18%, signal=53%	NQO1/SAT1/PSMB8/AMD1/PSMC5/PSME3/PSMB10/SMOX/PSMA6/PSMC4/PSMB9/PSMD10/SRM/PSME2/PSMA5/PSMD7/PSMD13/PSMB5/PSMD11/SMS/ODC1/PSME1/PSMA2/PSMA1/PSMC3/PSMD2/AGMAT/PSMD4/OAZ1/PSMC2/PSMB6/PSMA7/PSMD12/PSMD14/PSMB4/PSMB3/PSMA3
IZADPANAH_STEM_CELL_ADIPOSE_VS_BONE_UP	123	0.592623	2.25648	0.000262536	0.00296587	0.00166199	4072	tags=46%, list=14%, signal=40%	HMOX1/SRGN/KYNU/PTGR1/HAS2/SLC7A11/NQO1/CHN1/HPCAL1/MT1F/VEGFA/TP53I3/ELOA/KHDRBS3/FHOD1/PSMB8/CASP1/PHLDA2/HLA-B/FOSL1/LAP3/HECW2/HMGA2/RAB31/ACSL5/STAMBPL1/AIFM2/PSMB10/PREX1/LRP8/NOCT/LYRM2/CLEC2B/TSPAN5/ADORA2B/ORAI1/COTL1/PSMB9/HOXA11/MT1X/MARCH3/NEK6/PLAT/PAICS/SNX8/BTN3A3/ODC1/SERPINB1/HOXA10/ALYREF/DDX39A/LYN/MAPRE2/TUBB2A/SATB2/TREX1/TCIRG1
BERTUCCI_MEDULLARY_VS_DUCTAL_BREAST_CANCER_UP	200	0.555477	2.25322	0.000282087	0.00296587	0.00166199	4952	tags=50%, list=17%, signal=41%	SRGN/C1S/SOD2/BIRC3/IL32/IL27RA/PCOLCE2/GLRX/SLC2A6/ICAM1/IL15RA/PSAP/GRWD1/NOC3L/GTSE1/CBS/SOCS3/PSMB8/CGAS/NOP16/NOP2/CYBA/PPIF/NFKB2/PIM2/NR1H3/RELB/LAP3/ACSL5/STAMBPL1/PUS1/RARS/AIFM2/GABPB1/STAT1/DESI1/PSMB10/LINC00869/PQBP1/BUB3/DHX34/HERPUD1/HSPA4/TYMP/PRR13/EMG1/RCL1/MRTO4/C1RL/DTX3L/STYK1/PSMB9/SLC4A1AP/IFI30/TIAL1/POGLUT1/FAM53B/SCML1/MINPP1/PSMA5/KBTBD8/MYNN/C1orf174/PHB2/BTN3A3/EEF1AK…
LAIHO_COLORECTAL_CANCER_SERRATED_UP	113	0.598701	2.25292	0.00025974	0.00296587	0.00166199	4209	tags=46%, list=15%, signal=39%	C1S/DPYD/NXN/GBP1/PAM/PDGFC/HIF1A/HSPA8/SDCBP/BNIP3L/TM4SF1/AP2M1/B2M/LAMB1/CAPZA1/EMP3/PLEKHB2/RBM34/PRNP/CTSB/IFI27/EMC7/ANP32E/C5orf15/PDLIM5/MBD4/ATP6V0E1/ATP2B1/SEC62/VDAC3/ANXA5/CCN2/PXDN/LAMC1/PALLD/EPRS/DDX60/MYL6/SNRPE/MRPS14/TOMM7/NEDD8/PPIC/NOP10/SERF2/TAGLN2/COMMD3/IL6ST/POSTN/ATP1B1/ATP5F1C/PSMD4
BROWNE_INTERFERON_RESPONSIVE_GENES	65	0.656317	2.25205	0.000246002	0.00296587	0.00166199	2077	tags=40%, list=7%, signal=37%	IFI44L/IFI44/IFIT3/IFI6/GBP1/PML/IL15RA/UBE2L6/RGL1/IFIT2/TRIM22/IFI35/PSMB8/SP100/CASP1/SP110/NMI/IFI27/STAT1/BAZ1A/OASL/TYMP/ISG15/PSMB9/TRIM21/IFI30
REACTOME_PROCESSING_OF_CAPPED_INTRON_CONTAINING_PRE_MRNA	239	0.54383	2.24551	0.000302663	0.00296587	0.00166199	5860	tags=50%, list=21%, signal=40%	PPIL1/HSPA8/SRSF7/SRRM1/SF3B4/CHERP/NCBP2/CSTF2/PRPF4/PLRG1/EIF4E/SNRPN/CLP1/SEH1L/PRPF6/PQBP1/SRRT/SRSF3/FIP1L1/PHF5A/FUS/NUP54/SF3A3/LSM6/THOC2/GCFC2/NUP62/NXT1/CHTOP/SNRNP27/SMNDC1/PRPF3/THOC1/PPIE/U2SURP/HNRNPL/METTL3/SF3B3/RBM8A/SNRNP40/CCAR1/PPIL3/BCAS2/MAGOHB/PRPF38A/DDX23/HNRNPH2/SYMPK/USP39/PCBP1/POLR2G/NUP35/POLR2K/UPF3B/CD2BP2/DNAJC8/POLR2C/WTAP/NUP43/ZMAT5/PRPF40A/SNRPE/U2AF1L4/ALYREF…
REACTOME_TRNA_PROCESSING	111	0.598361	2.24526	0.000259134	0.00296587	0.00166199	5836	tags=56%, list=20%, signal=45%	POP1/TRMT6/METTL1/CSTF2/TRNT1/TYW3/NSUN2/TRMT61A/MTO1/PUS1/TRMT1/CLP1/SEH1L/TP53RK/TYW5/TYW1/WDR4/PUS3/RPP40/RPP38/RTCB/THADA/RPP14/NUP54/TRMT10C/DUS2/DDX1/TRMU/POP5/NUP62/CTU2/TRIT1/ZBTB8OS/TRMT11/NUP35/EPRS/QTRT1/NUP43/POP7/LAGE3/RAN/NUP93/TRMT61B/HSD17B10/TRDMT1/URM1/FTSJ1/CTU1/TRMT112/TRMT44/TRMT10A/TSEN2/ADAT2/TPRKB/TRMT12/TRMT13/TRMT5/POP4/NUP98/XPOT/NUP205/C2orf49
WINTER_HYPOXIA_METAGENE	231	0.544693	2.24255	0.000298418	0.00296587	0.00166199	2674	tags=39%, list=9%, signal=36%	IGFBP3/KRT14/HMOX1/VIM/PLOD2/CDKN1A/CA9/ITGA5/LOX/ALDOC/CXCL8/FTL/GBE1/NSG1/TGM2/TGFBI/P4HA1/TFRC/BNIP3/GLRX/MUC1/NFIL3/EDN2/QSOX1/FN1/ICAM1/INSIG1/SAT1/TIMM17A/HIF1A/GAPDH/BNIP3L/PNP/FABP5/VEGFA/PGF/PPAT/CCT6A/F3/PLAU/FOS/UMPS/TNFAIP3/PTGS2/BATF3/POLM/EGF/RRP9/STC2/ANGPTL4/HK2/PGK1/NFKB2/PGM1/PIM2/BACE2/PLAUR/BCL2L1/PFKFB3/TPBG/ENO1/IFI27/PKM/TXN/JUN/HSPD1/HERPUD1/DKC1/LDHA/SERPINB2/LONP1/NR4A1/…
TIAN_TNF_SIGNALING_VIA_NFKB	26	0.784841	2.23612	0.000223664	0.00296587	0.00166199	1342	tags=54%, list=5%, signal=51%	CXCL8/PLK2/TNIP1/CXCL1/GFPT2/CD83/CXCL2/CCL20/CXCL3/TNFAIP3/PTGS2/NFKB2/RELB/TNFRSF9
SEMENZA_HIF1_TARGETS	36	0.727134	2.22908	0.000229043	0.00296587	0.00166199	1878	tags=47%, list=7%, signal=44%	IGFBP3/HMOX1/CDKN1A/CA9/ALDOC/TFRC/BNIP3/GAPDH/VEGFA/HK2/PGK1/ENO1/PKM/LDHA/HK1/ALDOA/P4HA2
MCLACHLAN_DENTAL_CARIES_UP	208	0.546658	2.22276	0.0002886	0.00296587	0.00166199	2733	tags=35%, list=10%, signal=32%	C3/CFB/SERPINA1/SRGN/S100A8/SERPINE2/KYNU/S100A9/SAA1/SERPINA3/LAPTM5/IL7R/CXCL8/ALOX5AP/SOD2/BIRC3/SLC7A11/CFI/HCLS1/ANPEP/GLRX/IL1B/C3AR1/NFIL3/SAMSN1/TNFAIP6/ACKR1/ICAM1/SAT1/LSP1/CXCL1/FPR1/RAB29/NCF2/SEL1L3/FKBP11/PLAU/TNFAIP3/SOCS3/PTGS2/MTHFD2/TENT5C/CYBA/PIM2/SCO2/PLAUR/KPNA2/RAB31/CTSB/FAM49B/SERPINB2/IER3/NNMT/EVI2B/TYMP/CLEC2B/CFD/IGFBP4/SLAMF8/ARHGDIB/RGS2/IFI30/CA12/LCP1/MT1X/NAMPT/P…
REACTOME_FBXL7_DOWN_REGULATES_AURKA_DURING_MITOTIC_ENTRY_AND_IN_EARLY_MITOSIS	52	0.674811	2.22093	0.00023753	0.00296587	0.00166199	7048	tags=79%, list=25%, signal=59%	AURKA/PSMB8/PSMC5/PSME3/PSMB10/PSMA6/PSMC4/PSMB9/PSMD10/PSME2/PSMA5/PSMD7/PSMD13/PSMB5/PSMD11/PSME1/PSMA2/PSMA1/PSMC3/RPS27A/PSMD2/SKP1/FBXL18/UBC/PSMD4/RBX1/PSMC2/PSMB6/PSMA7/PSMD12/PSMD14/PSMB4/UBA52/PSMB3/PSMA3/PSMC6/PSMB7/PSMB1/PSMB2/PSMD1/SEM1
MOOTHA_VOXPHOS	86	0.612081	2.20912	0.000254001	0.00296587	0.00166199	7244	tags=72%, list=25%, signal=54%	CBARP/BCL2L1/CYCS/ATP5PD/ATP5F1B/COX7A2L/NDUFB5/ATP5F1E/ATP5MC2/CYB5A/CYC1/SURF2/NDUFA8/ATP5MC1/UQCR11/NDUFA9/NDUFA6/COX15/ATP5PO/NDUFA13/SDHA/ATP5F1D/BCS1L/ATP5PB/NDUFB2/TBCB/NDUFS3/COX7A2/NDUFA10/ATP5F1C/ATP5MC3/NDUFB3/NDUFB1/UQCRQ/NDUFC2/NDUFA3/COX5B/NDUFS2/NDUFB8/NDUFS6/MBD3/SDHD/UQCR10/NDUFS5/NDUFA4/UQCRB/UQCRFS1/NDUFAB1/NDUFS4/COX7C/ATP5MG/COX7B/UQCRH/SURF1/SDHB/SDHC/ATP5PF/NDUFB6/COX4I1/ND…
REACTOME_VIF_MEDIATED_DEGRADATION_OF_APOBEC3G	52	0.670344	2.20623	0.00023753	0.00296587	0.00166199	7048	tags=77%, list=25%, signal=58%	PSMB8/PSMC5/PSME3/PSMB10/PSMA6/PSMC4/PSMB9/PSMD10/ELOC/PSME2/PSMA5/PSMD7/PSMD13/PSMB5/PSMD11/PSME1/PSMA2/PSMA1/PSMC3/RPS27A/PSMD2/UBC/PSMD4/RBX1/PSMC2/PSMB6/PSMA7/PSMD12/PSMD14/PSMB4/UBA52/PSMB3/PSMA3/ELOB/PSMC6/PSMB7/PSMB1/PSMB2/PSMD1/SEM1
KEGG_PROTEASOME	41	0.699793	2.19742	0.0002331	0.00296587	0.00166199	7048	tags=83%, list=25%, signal=62%	PSMB8/PSMC5/PSME3/PSMB10/PSMA6/POMP/PSMC4/PSMB9/PSME2/PSMA5/PSMD7/PSMD13/PSMB5/PSMD11/PSME1/PSMA2/PSMA1/PSMC3/PSMD2/PSMD4/PSMC2/PSMB6/PSMA7/PSMD12/PSMD14/PSMB4/PSMB3/PSMA3/PSMC6/PSMB7/PSMB1/PSMB2/PSMD1/SEM1
YAO_TEMPORAL_RESPONSE_TO_PROGESTERONE_CLUSTER_14	136	0.567784	2.19062	0.000267881	0.00296587	0.00166199	4725	tags=49%, list=17%, signal=41%	SERPINE2/MME/DDX41/SERPINH1/TCERG1/ERGIC1/GALK1/DNAJC2/SSR3/VARS/FKBP11/BAX/P3H4/SSR1/PABPC4/RCN1/NSUN2/YKT6/TYMS/PKM/WDR74/RARS/MLEC/SEC61A1/TMEM97/LBHD1/MRPS10/TMEM167A/PRMT1/PRELID3B/MYDGF/UQCC2/CCT3/TMEM14C/NARS/CCT8/SLC39A7/MRPL20/SMARCA4/PSMB5/PTP4A3/NME1/ODC1/SMYD2/EBNA1BP2/SPCS3/PES1/SSR2/UBE2M/BANF1/SNRPA1/TOMM70/MRPL12/RGS19/CISD1/HMGN5/TBCB/TUBB6/GNPNAT1/EIF4G1/RWDD1/APEX1/PPP1R14B/DTY…
REACTOME_THE_ROLE_OF_GTSE1_IN_G2_M_PROGRESSION_AFTER_G2_CHECKPOINT	75	0.619162	2.18474	0.000249688	0.00296587	0.00166199	5167	tags=61%, list=18%, signal=50%	CDKN1A/TUBAL3/MAPRE1/GTSE1/PSMB8/PSMC5/PSME3/PSMB10/PSMA6/TUBA1C/PSMC4/PSMB9/PSMD10/PSME2/PSMA5/PSMD7/PSMD13/PSMB5/HSP90AA1/PSMD11/HSP90AB1/PSME1/PSMA2/PSMA1/TUBB3/PSMC3/CDK1/TUBB4B/TUBB2A/RPS27A/PSMD2/TUBA8/TUBB6/CCNB1/UBC/PSMD4/PSMC2/PSMB6/TUBB2B/PSMA7/PSMD12/PSMD14/PSMB4/UBA52/PSMB3/PSMA3
LI_DCP2_BOUND_MRNA	87	0.603509	2.1818	0.000254972	0.00296587	0.00166199	5339	tags=55%, list=19%, signal=45%	DNTTIP2/JMJD6/NOP56/PSMC5/SCO2/DEAF1/ENO1/WDR74/EXOSC4/BAZ1A/FAM50A/MRTO4/CUEDC2/TSPAN31/EIF3G/RUVBL2/TRIB3/CYC1/NOL7/TACO1/MRPS12/EEF1D/AP2S1/MAP2K2/ZNF593/PRPF40A/MTX1/ETFB/NQO2/MRPS11/PSMC3/BID/IDH3G/POLR2L/NDUFA13/MRPL12/HSD17B10/C12orf10/SAP30BP/TRAPPC2L/NOP53/FLII/APRT/EDF1/HMOX2/DCXR/DLEC1/ELOB
MARKEY_RB1_ACUTE_LOF_DN	200	0.537744	2.18129	0.000282087	0.00296587	0.00166199	2878	tags=34%, list=10%, signal=31%	IGFBP3/SRGN/NPR3/LGALS3BP/SAA1/IL7R/ALDOC/TNFSF9/SOD2/IFIT3/HCLS1/TGFBI/GLRX/C3AR1/GADD45A/SP140/SAT1/UBE2L6/FPR1/TGOLN2/NCF2/BNIP3L/PNP/EDEM2/IFIT2/LDLR/IFI35/GCNT2/SOCS3/PSMB8/ACSL4/GBP3/NCKAP1L/TMEM45A/PDK1/NSUN4/UBA7/PROCR/TOR3A/SELPLG/CTSB/DAXX/FAM162A/ZNFX1/STAT1/SAP30/PSMB10/HIST1H1C/CHCHD10/IRF9/ISG15/IFITM1/GRN/PSMB9/B3GNT2/SPHK1/LCP1/PNPT1/PFKP/PSME2/SEMA7A/NAMPT/MMP3/CSNK1D/MID1IP1/RTF…
REACTOME_STABILIZATION_OF_P53	55	0.655881	2.17959	0.0002405	0.00296587	0.00166199	7048	tags=73%, list=25%, signal=55%	MDM2/PSMB8/PSMC5/PSME3/PSMB10/PSMA6/PSMC4/PSMB9/PSMD10/PSME2/PSMA5/PSMD7/PSMD13/PSMB5/PHF20/PSMD11/PSME1/PSMA2/PSMA1/PSMC3/CHEK2/RPS27A/PSMD2/UBC/PSMD4/PSMC2/PSMB6/PSMA7/PSMD12/PSMD14/PSMB4/UBA52/PSMB3/PSMA3/PSMC6/PSMB7/PSMB1/PSMB2/PSMD1/SEM1
GROSS_ELK3_TARGETS_DN	29	0.741391	2.16894	0.000226449	0.00296587	0.00166199	3367	tags=52%, list=12%, signal=46%	IFI44/GBE1/VLDLR/BNIP3/SOCS3/PTGS2/ADAMTS1/PGM1/PDK1/FAM162A/HAX1/ADAMTS4/ERO1A/ACOX2/SLPI
REACTOME_NEGATIVE_REGULATION_OF_NOTCH4_SIGNALING	54	0.654404	2.16571	0.000240038	0.00296587	0.00166199	7048	tags=74%, list=25%, signal=56%	PSMB8/PSMC5/PSME3/TACC3/PSMB10/PSMA6/PSMC4/PSMB9/PSMD10/PSME2/PSMA5/PSMD7/PSMD13/PSMB5/PSMD11/PSME1/PSMA2/PSMA1/PSMC3/RPS27A/PSMD2/SKP1/UBC/PSMD4/RBX1/PSMC2/PSMB6/PSMA7/PSMD12/PSMD14/PSMB4/UBA52/PSMB3/PSMA3/PSMC6/PSMB7/PSMB1/PSMB2/PSMD1/SEM1
GHANDHI_BYSTANDER_IRRADIATION_UP	80	0.608124	2.164	0.00025355	0.00296587	0.00166199	2575	tags=44%, list=9%, signal=40%	KYNU/STC1/SLC39A8/PTGFR/CXCL8/SOD2/BIRC3/SLC7A11/IL1A/HSD11B1/IL1B/SAT1/CXCL1/RNF128/FGF2/CXCL2/DNAJB4/CXCL3/TNFAIP3/PTGS2/GCLM/LIF/IL13RA2/SLC39A14/RELB/DUSP2/CREB5/SERPINB2/POPDC3/DUSP5/MCTP1/MT1X/MT1E/NAMPT/MMP3
ONDER_CDH1_TARGETS_2_UP	248	0.520261	2.15709	0.000302847	0.00296587	0.00166199	2955	tags=41%, list=10%, signal=37%	IGFBP3/DCN/PID1/HMOX1/PLOD2/COL8A1/SRGN/CDH2/ZEB1/MME/LOX/SDC3/CADM3/MMP19/PTGFR/FTL/HAS2/FBN1/FERMT2/AOX1/CHST2/UGDH/PDGFRL/WNT5A/ANPEP/PCOLCE2/GLRX/CHN1/KDELR3/SLC22A4/FGFR1/ADAM12/TNFAIP6/MAP1B/FN1/ACKR1/FLOT1/TAGLN/ACTA2/ANXA6/RPS6KA2/FBLN5/ENO2/ABLIM3/LTBP1/TWIST1/RGL1/DGKI/PCDH9/SYNM/NR2F1/DNAJB4/DLC1/BIN1/ZCCHC24/GNG11/SDC2/NRP1/STC2/BLMH/ANOS1/MAGED1/NLRP1/CDKN2C/PRAF2/TBL1X/BICC1/PTX3/CD…
AMIT_EGF_RESPONSE_480_HELA	163	0.546622	2.15638	0.000278862	0.00296587	0.00166199	3072	tags=39%, list=11%, signal=35%	SERPINE2/ITGA5/SYDE1/STC1/GRAMD1B/TGM2/COL4A2/SMTN/HPCAL1/FGFR1/SH2D2A/PVR/SERPINH1/CCND1/MT1F/TM4SF1/RRP1/ENC1/PLAU/TOR4A/BIN1/PNO1/DUSP4/NCLN/PHLDA2/SLC19A1/PPIF/ERCC1/COL4A1/NFKB2/ARHGEF2/MAD1L1/PLAUR/BCL2L1/RRBP1/TPBG/HMGXB3/GABPB1/CCND3/ZFP36L2/PDLIM5/FAM214B/IGFBP4/RRP12/SPHK1/ZYX/OSMR/MT1X/DAPK3/CDV3/BCAR3/PHC2/FXR2/PTGS1/SPOUT1/TNFRSF21/HBEGF/RHOC/LPCAT4/H2AFX/AGRN/TNFRSF12A/EFHD2/ARHGEF18
FOURNIER_ACINAR_DEVELOPMENT_LATE_2	280	0.51383	2.15505	0.000311333	0.00296587	0.00166199	5318	tags=44%, list=19%, signal=36%	SERPINE2/COLGALT1/TNFRSF6B/COL4A2/SMTN/HPCAL1/IMPA1/FN1/ARF4/MT1F/AURKA/UAP1/EMC1/LDLR/ZWINT/SRRM1/TTC4/DUSP4/P3H4/PRPF4/CUTC/POLE3/PGK1/GTF2H2/FOSL1/PARP2/PLAUR/CCT2/PRDX1/STK17A/MAK16/ANP32E/TXN/PTGES3/NOC2L/PLOD3/PRPS1/LDHA/CKS2/TXNDC5/PRMT5/SEC23B/MRPL35/FEN1/EPHA2/CALM2/NOLC1/MAP4K4/HMBS/FASTKD1/MT1X/IDI1/RBM25/FLNA/PRDX3/BCAR3/PHC2/PRC1/UCHL5/ANXA5/SMARCA4/METTL3/SF3B3/KIF2C/TIPIN/SMC4/POLR…
REACTOME_DECTIN_1_MEDIATED_NONCANONICAL_NF_KB_SIGNALING	59	0.639527	2.15418	0.000242248	0.00296587	0.00166199	7048	tags=76%, list=25%, signal=58%	PSMB8/PSMC5/PSME3/NFKB2/RELB/PSMB10/PSMA6/PSMC4/PSMB9/PSMD10/PSME2/PSMA5/PSMD7/PSMD13/PSMB5/PSMD11/MAP3K14/PSME1/PSMA2/PSMA1/PSMC3/UBE2M/RPS27A/PSMD2/SKP1/UBC/PSMD4/PSMC2/PSMB6/PSMA7/PSMD12/PSMD14/PSMB4/UBA52/PSMB3/PSMA3/PSMC6/PSMB7/PSMB1/UBA3/CHUK/PSMB2/RELA/PSMD1/SEM1
REACTOME_DEFECTIVE_CFTR_CAUSES_CYSTIC_FIBROSIS	58	0.641502	2.15096	0.00024325	0.00296587	0.00166199	7048	tags=71%, list=25%, signal=53%	ERLIN1/PSMB8/PSMC5/PSME3/PSMB10/VCP/PSMA6/PSMC4/PSMB9/PSMD10/PSME2/PSMA5/PSMD7/PSMD13/PSMB5/ERLEC1/PSMD11/PSME1/PSMA2/PSMA1/PSMC3/RPS27A/PSMD2/UBC/PSMD4/PSMC2/PSMB6/PSMA7/PSMD12/PSMD14/PSMB4/DERL2/UBA52/PSMB3/PSMA3/PSMC6/PSMB7/PSMB1/PSMB2/PSMD1/SEM1
REACTOME_CROSS_PRESENTATION_OF_SOLUBLE_EXOGENOUS_ANTIGENS_ENDOSOMES	48	0.665634	2.14826	0.000238949	0.00296587	0.00166199	7048	tags=75%, list=25%, signal=57%	PSMB8/PSMC5/PSME3/PSMB10/AC080038.1/PSMA6/PSMC4/PSMB9/PSMD10/PSME2/PSMA5/PSMD7/PSMD13/PSMB5/PSMD11/PSME1/PSMA2/PSMA1/PSMC3/FCGR1B/PSMD2/PSMD4/PSMC2/PSMB6/PSMA7/PSMD12/PSMD14/PSMB4/PSMB3/PSMA3/PSMC6/PSMB7/PSMB1/PSMB2/PSMD1/SEM1
KARLSSON_TGFB1_TARGETS_UP	119	0.56626	2.14346	0.000263089	0.00296587	0.00166199	4244	tags=49%, list=15%, signal=42%	NIP7/BAG2/RPF2/RSL1D1/DDX21/EIF2S1/PPRC1/EIF3A/PPP1R2/JADE1/UTP18/COQ10B/NSUN2/GTPBP4/PUM3/CCT2/MAK16/TOMM20/LYAR/TNFRSF9/BAZ1A/LRP8/MYBBP1A/TCP1/ZC3H15/MRTO4/PELO/EIF2B3/HSPH1/EIF3B/NOLC1/ZYX/SRM/EIF5/CCT3/CTU2/PTP4A1/CCT8/GNL3/C20orf27/CACYBP/CCN2/MSN/ABCE1/GEMIN6/TNFRSF12A/GARS/EIF2S2/CHD3/HSPE1/WDR77/RCC1/TOMM70/EIF5AL1/SLC20A1/EIF4G1/SET/RWDD1
REACTOME_AUF1_HNRNP_D0_BINDS_AND_DESTABILIZES_MRNA	53	0.64984	2.14242	0.000239349	0.00296587	0.00166199	7048	tags=77%, list=25%, signal=58%	HSPA8/PSMB8/PSMC5/PSME3/PSMB10/HSPA1A/PSMA6/PSMC4/PSMB9/PSMD10/PSME2/PSMA5/PSMD7/PSMD13/PSMB5/PSMD11/PSME1/PSMA2/PSMA1/PSMC3/RPS27A/PSMD2/UBC/EIF4G1/PSMD4/PSMC2/PSMB6/PSMA7/PSMD12/PSMD14/HNRNPD/PSMB4/UBA52/PSMB3/PSMA3/PSMC6/PSMB7/PSMB1/PSMB2/PSMD1/SEM1
LENAOUR_DENDRITIC_CELL_MATURATION_DN	124	0.561894	2.14094	0.00026295	0.00296587	0.00166199	1779	tags=27%, list=6%, signal=25%	C3/RTN1/SERPINA1/S100A8/KYNU/AKR1C1/S100A9/CXCL8/SOD2/PPBP/ANPEP/GSR/IL1B/C3AR1/ME1/S100A4/CES1/CXCL2/DOK1/SF3B4/CXCL3/SDC2/ITPR1/GLA/EMP3/PPIF/IL1R2/PLAUR/ZFP36L2/IER3/ISG15/CLEC2B/HTRA1
TSUNODA_CISPLATIN_RESISTANCE_DN	44	0.673002	2.13684	0.000237248	0.00296587	0.00166199	1893	tags=41%, list=7%, signal=38%	C3/CFB/C1S/KYNU/NPR3/FBN1/WNT5A/FN1/ID1/PTGS2/ITPR1/SORD/ASS1/CTSB/FBN2/FSTL3/IGFBP4/RABEPK
REACTOME_DEGRADATION_OF_DVL	55	0.642167	2.13402	0.0002405	0.00296587	0.00166199	7048	tags=73%, list=25%, signal=55%	HECW1/PSMB8/PSMC5/PSME3/PSMB10/PSMA6/PSMC4/PSMB9/PSMD10/PSME2/PSMA5/PSMD7/PSMD13/PSMB5/PSMD11/PSME1/PSMA2/PSMA1/PSMC3/CUL3/RPS27A/PSMD2/UBC/PSMD4/RBX1/PSMC2/PSMB6/PSMA7/PSMD12/PSMD14/PSMB4/UBA52/PSMB3/PSMA3/PSMC6/PSMB7/PSMB1/PSMB2/PSMD1/SEM1
PELLICCIOTTA_HDAC_IN_ANTIGEN_PRESENTATION_DN	49	0.656527	2.12928	0.000238834	0.00296587	0.00166199	6867	tags=69%, list=24%, signal=53%	PSMB8/PSMC5/PSME3/HLA-B/TAP2/HLA-A/PSMB10/PSMA6/PSMB9/ERAP2/PSME2/PSMD7/PSMB5/ATF4/PSMD11/PSME1/HLA-C/PSMA2/PSMA1/PSMC3/TAPBPL/NGLY1/TAP1/SERP1/PSMC2/PSMB6/PSMA7/PSMD14/PSMA3/HMGCS1/PSMC6/PSMB2/PDIA5/TAPBP
REACTOME_REGULATION_OF_APOPTOSIS	51	0.650506	2.12825	0.00023855	0.00296587	0.00166199	7048	tags=73%, list=25%, signal=55%	PSMB8/PSMC5/PSME3/PSMB10/PSMA6/PSMC4/PSMB9/PSMD10/PSME2/PSMA5/PSMD7/PSMD13/PSMB5/PSMD11/PSME1/PSMA2/PSMA1/PSMC3/RPS27A/PSMD2/UBC/PSMD4/PSMC2/PSMB6/PSMA7/PSMD12/PSMD14/PSMB4/UBA52/PSMB3/PSMA3/PSMC6/PSMB7/PSMB1/PSMB2/PSMD1/SEM1
SCHLOSSER_MYC_TARGETS_REPRESSED_BY_SERUM	160	0.540925	2.12655	0.000278242	0.00296587	0.00166199	4793	tags=48%, list=17%, signal=40%	TCERG1/DNAJC2/CHERP/PNO1/EIF2S1/NUFIP1/DDX10/MTHFD2/FASTKD2/ZNF330/NOP16/EIF3A/HK2/POLE3/BLMH/EIF4E/PUM3/DEAF1/KPNA2/CCT2/GNL2/TRIAP1/TOMM20/TXN/PTGES3/TMX1/HSPD1/CNBP/CYCS/BUB3/PRPS1/CCT5/SERBP1/RNF114/TGDS/ZC3H15/ITPA/HIRA/NOLC1/TARS/RABGGTB/SMN1/TIAL1/DDX1/SLC25A17/NGDN/CCT8/PGAM1/TFAM/C12orf29/GARS/EPRS/UBE2K/SSBP1/DCUN1D4/PWP1/SSB/HSPE1/RAN/EXOSC8/EIF4A3/NUP93/ETF1/TOMM70/CEBPB/C5orf30/SERP1…
KANG_IMMORTALIZED_BY_TERT_UP	82	0.593345	2.12304	0.000252781	0.00296587	0.00166199	2142	tags=32%, list=8%, signal=29%	C3/COL8A1/PCDH7/TNFRSF6B/WNT5A/BNIP3/HPCAL1/NRCAM/ICAM1/PDGFC/TNC/FGF2/CLN8/LAMB1/BDNF/BCL2L1/ENO1/IL21R/BGN/GPR162/SERPINB2/NNMT/SLC6A6/P4HA2/IFI30/TNFRSF11B
REACTOME_PROTEIN_LOCALIZATION	159	0.53967	2.12045	0.000277701	0.00296587	0.00166199	5594	tags=54%, list=20%, signal=44%	HMOX1/MPV17/ACOX3/TIMM17A/TIMM10B/TIMM22/SAMM50/GRPEL1/TIMM8A/COA6/TIMM44/PMPCA/DECR2/ACOT2/PRNP/TOMM20/CHCHD3/PAM16/HSPD1/CHCHD10/TIMM21/ECH1/TOMM5/ATP5F1B/SLC25A4/PEX2/CHCHD4/SLC25A17/MTX2/PECR/STX1A/TIMM10/CYB5A/VDAC1/TIMM50/ABCD2/CYC1/TIMM23/PEX5/COA4/ACO2/ATP5MC1/CMC2/HMGCL/UBL4A/IDH1/ACOX2/GET4/GFER/WRB/PEX16/MTX1/DDO/IDH3G/SGTA/TOMM7/TIMM9/TIMM8B/TOMM70/PEX14/UBE2J2/SEC61G/RPS27A/BCS1L/NOS…
SARTIPY_NORMAL_AT_INSULIN_RESISTANCE_UP	29	0.724793	2.12038	0.000226449	0.00296587	0.00166199	4092	tags=59%, list=14%, signal=50%	HMOX1/SRXN1/NOP58/BYSL/PPAN/NOP56/IER2/FOSL1/C12orf45/PHLDA1/MAK16/NOCT/B3GNT2/TUBB2A/PTGES/AC092338.1/TUBB6
CHIANG_LIVER_CANCER_SUBCLASS_UNANNOTATED_DN	192	0.525918	2.11794	0.00028177	0.00296587	0.00166199	4926	tags=45%, list=17%, signal=37%	PGD/FUCA2/DNAJA1/BAG2/PPIL1/MAPRE1/HSPA8/EEF1AKNMT/MRPL42/STIP1/FKBP11/FARSA/BAX/POLE3/PGK1/DNAJB9/VAMP3/MAGED1/MRPS23/ABHD6/CCT2/TYMS/HSPA13/TP53RK/NEU1/TMX1/PRPS1/SEC61A1/SEC23B/PBK/TMBIM4/FEN1/CMAS/ALDOA/CCT4/TPX2/PSMD10/SNHG29/ATIC/PPP2R3C/ATG3/ADH5/PSMA5/VBP1/VDAC3/FBXO10/SCAMP3/MRPS12/E2F5/CD46/HSP90AB1/PRMT6/CNN3/PSMA2/PSMC3/PRKAB1/WDR61/GFM2/CDK1/H2AFZ/RFC3/FUNDC1/RAN/MCTS1/DPCD/MRPL39/DC…
KRIEG_HYPOXIA_VIA_KDM3A	52	0.643053	2.11641	0.00023753	0.00296587	0.00166199	3461	tags=50%, list=12%, signal=44%	HMOX1/TM4SF19/ASPH/BIRC3/TGM2/ZC3H12A/EDN2/GDF15/INSIG1/PIMREG/CXCL1/TM4SF1/PHLDA2/PLAUR/HMGA2/TYMS/ANP32E/YWHAG/SERPINB8/MARCH3/KIF2C/RBM3/MAP3K14/SELENOH/NRP2/FABP6
REACTOME_HEDGEHOG_LIGAND_BIOGENESIS	62	0.620907	2.11333	0.000242954	0.00296587	0.00166199	5167	tags=60%, list=18%, signal=49%	PSMB8/PSMC5/PSME3/P4HB/PSMB10/VCP/PSMA6/PSMC4/PSMB9/PSMD10/HHAT/PSME2/PSMA5/PSMD7/PSMD13/PSMB5/ERLEC1/DISP2/PSMD11/PSME1/PSMA2/PSMA1/PSMC3/RPS27A/PSMD2/UBC/PSMD4/PSMC2/PSMB6/PSMA7/PSMD12/PSMD14/PSMB4/DERL2/UBA52/PSMB3/PSMA3
FARMER_BREAST_CANCER_CLUSTER_1	31	0.712785	2.11266	0.000227998	0.00296587	0.00166199	1664	tags=26%, list=6%, signal=24%	IFI44L/IFI44/IFIT3/IFI6/IFIT1/FKBP11/OASL/ISG15
FARDIN_HYPOXIA_11	32	0.708111	2.11113	0.000228206	0.00296587	0.00166199	2129	tags=56%, list=7%, signal=52%	IGFBP3/ALDOC/BNIP3/EGLN3/PLOD1/TNIP1/BNIP3L/VEGFA/MTFP1/ANGPTL4/PGK1/PGM1/MAPT/PDK1/FAM162A/P4HA2/FUT11/DDIT4
MCDOWELL_ACUTE_LUNG_INJURY_UP	43	0.665099	2.10898	0.000235018	0.00296587	0.00166199	2868	tags=47%, list=10%, signal=42%	S100A8/CDKN1A/LOX/LRG1/SERPINA3/TGFBI/TXNRD1/TNC/LTBP1/FOS/ANGPTL4/PTX3/DUSP1/LTF/NR4A1/SPHK1/OSMR/CSTB/SLFN12/RBM3
LIAN_LIPA_TARGETS_3M	44	0.664098	2.10857	0.000237248	0.00296587	0.00166199	1348	tags=25%, list=5%, signal=24%	HMOX1/S100A9/SAA1/MMP19/MAFB/C3AR1/GDF15/SNX6/IL1R2/CTSB/NEU1
RODWELL_AGING_KIDNEY_NO_BLOOD_UP	203	0.519257	2.10696	0.000285878	0.00296587	0.00166199	2439	tags=28%, list=9%, signal=26%	C3/CFB/C1S/SERPINE2/C1R/GGT5/ZEB2/FBN1/MFGE8/TIMP2/PLK2/CCN3/COL27A1/PAM/FN1/SERPINH1/TAGLN/MYRF/ABCC3/PDGFC/TNC/CXCL2/VARS/NR2F1/RPS27L/ZCCHC24/SOCS3/GPX8/RBMS3/AATF/DEGS1/CALU/B3GAT3/P4HB/MGLL/TPBG/ABI3BP/CKAP4/LTF/ALPK2/PLOD3/FEZ2/NNMT/TXNDC5/ANTXR2/UBE2Z/ZMAT3/PAPPA2/ANTXR1/MIOS/HEXB/OSMR/TNFRSF11B/TFPI/MYDGF/VEGFC/C4A
JECHLINGER_EPITHELIAL_TO_MESENCHYMAL_TRANSITION_UP	62	0.619027	2.10693	0.000242954	0.00296587	0.00166199	2684	tags=42%, list=9%, signal=38%	DCN/VIM/S100A8/CDH2/IFIT3/SNAI1/VLDLR/SERPINH1/TNC/GALK1/HIF1A/IFITM3/ADSSL1/B2M/LAMB1/SDC2/MTHFD2/GBP3/PROCR/STAT1/ISG15/HTRA1/SRM/C4A/PTGS1/BCL3
WUNDER_INFLAMMATORY_RESPONSE_AND_CHOLESTEROL_UP	49	0.648633	2.10367	0.000238834	0.00296587	0.00166199	2848	tags=43%, list=10%, signal=39%	SERPINA1/KRT16/IFI44/DMBT1/TFRC/FLOT1/B2M/PSMB8/CASP1/SP110/TAP2/UBA7/SOCS1/STAT1/PSMB10/PSMB9/PSME2/CASP7/BST2/CD14/ERO1A
COLDREN_GEFITINIB_RESISTANCE_UP	85	0.583847	2.10277	0.000252972	0.00296587	0.00166199	3538	tags=49%, list=12%, signal=43%	CDH2/ZEB1/PDCD11/P3H1/MAP1B/LIX1L/IKBIP/ALDH1B1/WDR62/TRNT1/NOL8/PPIF/TWNK/SLC39A14/TBL1X/BMS1/CDK5RAP2/TRMT1/DLX1/SRRT/KLHL15/NXPE3/RFK/SELENOM/CTPS1/QPCT/RABEPK/TIMM50/MFSD12/MLLT11/BORCS7/C20orf27/RFLNB/POLRMT/SLC47A1/PDHA1/SACS/GAS5/PTPRG/SUPV3L1/UBE2M/COX15
KEGG_RNA_POLYMERASE	29	0.717628	2.09942	0.000226449	0.00296587	0.00166199	5046	tags=72%, list=18%, signal=60%	POLR3G/POLR1E/POLR3GL/POLR1C/POLR3K/POLR3H/POLR3A/POLR3F/POLR2G/POLR2K/ZNRD1/POLR2C/POLR1B/POLR2L/POLR2I/POLR3D/POLR2D/POLR2H/POLR2F/POLR2B/POLR2E
REACTOME_TRANSLATION	291	0.499093	2.09909	0.000317561	0.00296587	0.00166199	7029	tags=63%, list=25%, signal=48%	SSR3/MRPL42/MRPS30/VARS/RPS27L/FARSA/EIF2S1/SSR1/EIF3A/MRPS25/MARS2/EIF4E/MRPS23/AIMP1/RARS/AARS/HARS/AIMP2/SRP19/MRPS18C/SEC61A1/HARS2/EIF3J/MRPS10/MRPL35/MRPL32/N6AMT1/KARS/MRPL21/EIF2B3/EIF3B/DAP3/TARS/MRPL50/EIF3G/MRPL41/EIF5/MRPL1/SRPRB/MRPL18/MRPS5/EIF2B1/EIF2B2/EIF4A1/NARS/MRPL52/MRPL20/MRPL46/MRPS17/EARS2/SRP72/MRPS12/EIF5B/SARS2/EIF3D/TUFM/MRPS35/MRPL9/EEF1D/MRPL34/GARS/EPRS/SPCS3/EIF2S2…
EINAV_INTERFERON_SIGNATURE_IN_CANCER	27	0.72776	2.09833	0.000224065	0.00296587	0.00166199	2529	tags=52%, list=9%, signal=47%	IFI44L/IFI44/IFIT3/IFI6/IFIT1/UBE2L6/IFI35/SP100/SP110/STAT1/IRF9/ISG15/IFI30/BST2
KEGG_AMINO_SUGAR_AND_NUCLEOTIDE_SUGAR_METABOLISM	43	0.660977	2.09591	0.000235018	0.00296587	0.00166199	6246	tags=63%, list=22%, signal=49%	UGP2/UGDH/HEXA/GALK1/GFPT2/UAP1/GNPDA1/CYB5R1/HK2/PGM1/GNE/HK1/CMAS/HEXB/MPI/GALE/AMDHD2/UXS1/GMPPA/GNPNAT1/GALK2/NANS/TSTA3/PGM3/GMPPB/GNPDA2/GPI
PETROVA_ENDOTHELIUM_LYMPHATIC_VS_BLOOD_DN	154	0.532884	2.08718	0.000276319	0.00296587	0.00166199	2388	tags=36%, list=8%, signal=33%	HMOX1/PLOD2/COL8A1/SRGN/CDH2/CDKN1A/ITGA5/CXCL8/TGM2/TGFBI/ANPEP/IL32/NRCAM/GADD45A/PLOD1/ICAM1/TAGLN/ACTA2/FAP/ANXA6/CD59/ENO2/CXCL1/MVP/MT1F/SRPX/UAP1/PGF/TRIM22/PLAU/TP53I3/RCN1/EMP3/SLC38A6/LOXL2/SORD/ECE1/BMP6/PRNP/ARL6IP5/PROCR/IFI27/BGN/JUN/CHST1/IER3/NNMT/ISG15/ARHGDIB/BASP1/TPM2/MT1X/MT1E/MLLT11/EIF2B2/VEGFC
LIEN_BREAST_CARCINOMA_METAPLASTIC_VS_DUCTAL_UP	72	0.595144	2.08133	0.000248633	0.00296587	0.00166199	3755	tags=42%, list=13%, signal=36%	HMOX1/VIM/PLOD2/CXCL8/COLGALT1/HAS2/SOD2/PCOLCE2/COL27A1/PLOD1/ICAM1/FAM129B/FABP5/ANGPTL4/IL1R2/CALU/PRNP/PTX3/HRH1/ADORA2B/TNFRSF11B/FLNA/MSN/TNFRSF12A/FJX1/COL9A3/IGF2BP3/FAM126A/CTSZ/CEBPB
AZARE_NEOPLASTIC_TRANSFORMATION_BY_STAT3_UP	123	0.546514	2.08092	0.000262536	0.00296587	0.00166199	2575	tags=36%, list=9%, signal=33%	PID1/CFH/SRGN/S100A8/SERPINE2/S100A9/PCDH7/NSG1/AOX1/PLK2/IFI6/SH2D2A/MAP1B/FN1/TNC/CSF3/LTBP1/GPX3/SSR3/PTGS2/DUSP4/GNG11/VNN1/MAN1A1/EMP3/IL13RA2/SNRPN/CALU/YKT6/PRNP/HRH1/IFI27/TGFBR2/GABPB1/NNMT/IFITM1/ARHGDIB/CA12/ARHGAP25/DCBLD2/CDV3/CLIC4/TGFA/MMP3
WELCSH_BRCA1_TARGETS_DN	140	0.537317	2.07945	0.000269906	0.00296587	0.00166199	4985	tags=51%, list=18%, signal=42%	STC1/DNTTIP2/PDCD11/BYSL/CCND1/GALK1/EZR/PPAT/FARSA/DDX10/SLC19A1/CCDC85B/PABPC4/MGST1/PWP2/PMPCA/BMS1/DUSP1/CKAP4/RARS/MLEC/SON/CDC37/AIMP2/EMG1/HK1/CTPS1/EIF3B/RPIA/RABEPK/CLTA/NOLC1/SF3A3/SRM/ATIC/VDAC1/PKN1/PHKG2/CYC1/EIF2B2/NARS/SLC39A7/SKIV2L/SMARCA4/POLRMT/MRPS12/UBL4A/POLG/NME3/PIEZO1/DNAJC7/SSBP1/EIF3E/AP3D1/SNRPA1/RCC1/NOS2/MOGS/XRCC5/NMT1/ALG3/SRSF11/HSPA1B/APEX1/BOP1/POLD1/SF3B2/GCSH/…
GROSS_HYPOXIA_VIA_HIF1A_UP	74	0.588993	2.07711	0.000247647	0.00296587	0.00166199	5407	tags=54%, list=19%, signal=44%	TFRC/MAT2A/NOP58/MGAT2/SRSF7/DDX21/F2R/TSR1/CCNH/NOP56/PPRC1/AMD1/SLC19A1/KPNA2/ACSL5/CSF1/NSL1/RCL1/CTPS1/TRIM21/SRM/CCT3/MAP3K11/TAF1D/PSMB5/CACYBP/AKAP8/ACOX2/WRB/G3BP1/PPID/TIMM9/MOGS/TARDBP/IMPACT/MGAT4B/NDUFB8/EXOSC1/NAP1L1/AMPD2
BASSO_B_LYMPHOCYTE_NETWORK	140	0.535849	2.07377	0.000269906	0.00296587	0.00166199	4793	tags=51%, list=17%, signal=42%	SRGN/LAPTM5/IL27RA/MAP1B/S100A4/ANXA6/SAT1/BYSL/TIMM17A/RIPOR2/MVP/TGOLN2/SAR1A/BIN1/CASP4/EIF2S1/SP100/ITPR1/NOP16/BLMH/SLC39A14/LGALS9/PLCB2/HDDC2/DESI1/CYCS/AIMP2/SERBP1/IFITM1/TCP1/EMG1/FEN1/CTPS1/QPCT/SLC25A4/TPX2/ZYX/ELOC/RUVBL2/CYC1/PRDX3/AHSA1/UBE2S/PSMB5/PAICS/MRPS12/NME1/GABARAP/MYL12A/EBNA1BP2/WDR18/GARS/PES1/ZNF593/SSBP1/FAM98A/CDK1/HSPE1/RCC1/MRPL12/PSMD2/CCNB1/POLD2/POLR2H/EIF4G1/PO…
MOOTHA_HUMAN_MITODB_6_2002	421	0.47589	2.07315	0.000348797	0.00296587	0.00166199	5658	tags=50%, list=20%, signal=40%	SOD2/HCLS1/GSR/BNIP3/GDF15/CYP27B1/TIMM17A/CASP8/BNIP3L/MRPL42/MRPS30/DECR1/UROS/TIMM22/FARSA/BAX/MTHFD2/ACSL4/SLC25A20/CYBA/PPIF/POLG2/TIMM8A/CBARP/TOMM34/VDAC2/TIMM44/ALAS1/PDK1/SPG7/BCL2L1/PYCR1/ACSL5/HCCS/SLC25A15/TOMM20/TXN/NFS1/HSPD1/CYCS/ATP5PD/MRPS18C/LONP1/DIABLO/OGDH/HSPA1A/OGG1/MRPS10/MRPL35/ATP5F1B/HK1/DHODH/CPOX/MLH3/IDH3B/SLC25A4/DAP3/COX7A2L/GCFC2/HAX1/NDUFB5/ATP5F1E/SLC25A17/ATP5M…
REACTOME_REGULATION_OF_MRNA_STABILITY_BY_PROTEINS_THAT_BIND_AU_RICH_ELEMENTS	85	0.575135	2.07139	0.000252972	0.00296587	0.00166199	6503	tags=65%, list=23%, signal=50%	HSPA8/PSMB8/PSMC5/PSME3/PSMB10/EXOSC4/EXOSC9/HSPA1A/PSMA6/EXOSC2/ANP32A/PSMC4/PSMB9/PSMD10/PSME2/PSMA5/PSMD7/PSMD13/EXOSC3/PSMB5/PSMD11/PSME1/PSMA2/PSMA1/ZFP36L1/PSMC3/EXOSC8/ZFP36/RPS27A/PSMD2/YWHAB/DCP1A/EXOSC5/UBC/EIF4G1/PSMD4/SET/PSMC2/PSMB6/PSMA7/EXOSC6/PSMD12/PSMD14/HNRNPD/PSMB4/UBA52/EXOSC1/PSMB3/PSMA3/MAPK11/PSMC6/PSMB7/PSMB1/DIS3/PSMB2
SCHUETZ_BREAST_CANCER_DUCTAL_INVASIVE_UP	319	0.487	2.07072	0.000323206	0.00296587	0.00166199	2080	tags=27%, list=7%, signal=26%	IGFBP3/DCN/CFH/HMOX1/SRGN/C1S/SERPINE2/PROS1/ZEB1/MME/LOX/C1R/LAPTM5/AKR1B1/MAFB/LHFPL6/FTL/DPYD/ZEB2/FBN1/FERMT2/TGM2/HCLS1/TGFBI/COL4A2/IL1R1/GLRX/C3AR1/GBP1/SAMSN1/ADAM12/MFAP5/PTPRM/PAM/TNFAIP6/MAP1B/FN1/SERPINH1/S100A4/FAP/ESM1/TWIST1/GFPT2/SLC16A3/TRIM22/FKBP11/PLAU/TP53I3/F2R/FSTL1/LAMB1/SDC2/ACSL4/GEM/CASP1/NRP1/EMP3/COL4A1/LOXL2/PLAUR/BICC1/PRNP/FBN2/TDO2/BGN/TGFBR2/AC080038.1/FXYD5/RECK…
MACAEVA_PBMC_RESPONSE_TO_IR	99	0.561884	2.0704	0.000257202	0.00296587	0.00166199	3918	tags=38%, list=14%, signal=33%	DNER/CDKN1A/TNFRSF10D/TIGAR/PLK2/AEN/FBXO22/GADD45A/IKBIP/MDM2/ACTA2/ASTN2/TRIM22/RPS27L/BAX/NSF/TNFRSF10B/TRIAP1/EDA2R/RRM2B/TMEM30A/DENND2D/ZMAT3/TNFSF4/PHPT1/PVT1/MAP4K4/PTP4A1/FAS/FDXR/PAPPA-AS1/APOBEC3C/BLOC1S2/CMBL/PRKAB1/MAMDC4/LRMP/HECTD3
ELVIDGE_HIF1A_TARGETS_DN	91	0.569224	2.07005	0.000257533	0.00296587	0.00166199	1331	tags=34%, list=5%, signal=33%	IGFBP3/CA9/LOX/STC1/ALDOC/GBE1/VLDLR/SCNN1B/P4HA1/BNIP3/GLRX/EGLN3/QSOX1/PAM/SPAG4/S100A4/ENO2/BNIP3L/SRPX/FOS/ANGPTL4/HK2/PGK1/PGM1/LOXL2/TMEM45A/PDK1/QRSL1/CCN5/PFKFB3/FAM162A
SCHOEN_NFKB_SIGNALING	34	0.683453	2.06809	0.000229253	0.00296587	0.00166199	1342	tags=38%, list=5%, signal=36%	C3/IGFBP3/SERPINA3/CXCL8/BIRC3/IL1A/IL1B/FN1/CXCL2/PTGS2/TPST1/PTX3/TNFRSF9
KRIEG_KDM3A_TARGETS_NOT_HYPOXIA	196	0.511866	2.06771	0.000282885	0.00296587	0.00166199	4547	tags=43%, list=16%, signal=37%	SAA2/IFI44/SAA1/CDKN1C/IFIT3/TNFSF14/F2RL2/GBP1/CARD16/STAT4/METTL1/SRSF7/COA7/POLR3GL/IFI35/PGRMC1/DPH3/UMPS/B2M/ATP6AP2/TDG/SDSL/CSTF2/RIOK1/ZNHIT6/CAPZA1/NOL8/GBP3/LRRC47/LGALS9/APTX/RTCA/ACSL5/STAT1/NFS1/RRM2B/PSMB10/MRPS18C/SHISA2/TPM3/PHF11/TMBIM4/WDR4/EMG1/GLMN/EIF2B3/RABEPK/AP1S1/COQ3/PAQR3/PSME2/PDCD2L/TMEM126A/TAF1D/VBP1/METTL3/GABARAP/MAGOHB/PRPF38A/CHMP4A/ZNF226/NDUFA12/RPE/WDR73/ERFE…
BOQUEST_STEM_CELL_UP	238	0.50006	2.06248	0.00030349	0.00296587	0.00166199	1779	tags=26%, list=6%, signal=25%	C3/IGFBP3/DCN/CFB/PID1/CFH/C1S/SERPINE2/AKR1C1/MME/LOX/SERPINA3/C1R/PTGFR/MAFB/FBN1/AOX1/UGDH/PDGFRL/WNT5A/ANPEP/PCOLCE2/DKK2/MFAP5/TNFAIP6/SVEP1/S100A4/CES1/FAP/SUSD5/TNC/FBLN5/ABCA6/TWIST1/GFPT2/SRPX/PCDH9/SERPINA5/F3/SDC2/PHLDA2/EMP3/LIF/CAPN6/SLC39A14/TMEM45A/CDKN2C/OMD/BICC1/CCN5/PTX3/ABI3BP/GLT8D2/IRS1/C5orf15/AC080038.1/RECK/ATP1A2/OLFML2B/PLA2G2A/CFD/HTRA1
SENESE_HDAC1_TARGETS_UP	444	0.470128	2.05872	0.000357654	0.00298207	0.00167107	3275	tags=30%, list=12%, signal=27%	C3/SRGN/KYNU/AKR1C1/SAA1/SQSTM1/SLC39A8/IL7R/CXCL8/ASPH/SOD2/BIRC3/SLC7A11/TGM2/MLKL/SLCO4A1/IL1A/SNHG16/GSR/TFRC/PSAT1/GLRX/ZC3H12A/DUSP3/FN1/ATP6V0A4/LETM2/LIG4/ESM1/PNP/SRPX/SSR3/TM4SF1/EZR/GPAT3/DGKI/VEGFA/CCL20/SLAMF7/CHRNA9/STIP1/DUS3L/PLAU/TMEM156/PNO1/CXCL3/TNFAIP3/MLX/TOR1AIP1/MPP4/GEM/ITPR1/PAX8-AS1/PPIF/DNAJB9/DEGS1/NFKB2/PLEKHB2/IL13RA2/SLC39A14/FOSL1/MGST1/MSANTD4/TNFRSF10B/CPNE5/BCL…
ELVIDGE_HIF1A_AND_HIF2A_TARGETS_DN	104	0.55326	2.05574	0.000258933	0.00296587	0.00166199	1444	tags=34%, list=5%, signal=32%	IGFBP3/CA9/LOX/STC1/ALDOC/GBE1/VLDLR/SCNN1B/P4HA1/BNIP3/GLRX/EGLN3/QSOX1/PAM/SPAG4/S100A4/LIMCH1/ENO2/BNIP3L/SRPX/VEGFA/FOS/ITPR1/ANGPTL4/HK2/PGK1/PGM1/LOXL2/TMEM45A/PDK1/PLAUR/CCN5/PFKFB3/FAM162A/SRD5A3
REACTOME_APC_C:CDH1_MEDIATED_DEGRADATION_OF_CDC20_AND_OTHER_APC_C:CDH1_TARGETED_PROTEINS_IN_LATE_MITOSIS_EARLY_G1	70	0.589429	2.05214	0.000247463	0.00296587	0.00166199	6503	tags=64%, list=23%, signal=50%	AURKA/PSMB8/PSMC5/CDC20/PSME3/ANAPC7/PSMB10/PSMA6/PSMC4/PSMB9/PSMD10/PSME2/PSMA5/CDC26/PSMD7/PSMD13/PSMB5/PSMD11/PSME1/ANAPC4/PSMA2/PSMA1/PSMC3/RPS27A/PSMD2/UBC/PSMD4/UBE2C/PSMC2/PSMB6/PSMA7/PSMD12/PSMD14/PSMB4/UBA52/PSMB3/PSMA3/ANAPC2/ANAPC5/ANAPC16/PSMC6/PSMB7/ANAPC11/PSMB1/PSMB2
WONG_EMBRYONIC_STEM_CELL_CORE	331	0.480932	2.05164	0.000325309	0.00296587	0.00166199	5079	tags=44%, list=18%, signal=37%	ALDOC/CDKN1C/FAM136A/UGDH/FGFR1/SERPINH1/NIP7/UBE2V2/CCND1/NIFK/BRIX1/E2F3/AURKA/MRPS30/GTSE1/GNPDA1/STIP1/TRIP6/FARSA/BAX/MTHFD2/NCBP2/EIF3A/NOP2/UTP18/CDC20/PSME3/NIPSNAP1/TIMM8A/TIMM44/KPNA2/PRDX1/PUS1/ENO1/ANP32E/CYCS/BUB3/PRPS1/CCT5/CKS2/HELLS/LBHD1/POLR3K/PRMT1/MRTO4/PHF5A/RPP40/DAP3/HSPA14/COQ3/HDAC1/GEMIN2/RUVBL2/ADH5/ADSL/PSMA5/PA2G4/EIF4A1/VBP1/ACAD8/LMNB1/LSM10/HNRNPL/GNL3/SNRNP40/ECHS…
KAN_RESPONSE_TO_ARSENIC_TRIOXIDE	118	0.541292	2.04787	0.00026295	0.00296587	0.00166199	2572	tags=35%, list=9%, signal=32%	HMOX1/TRIM16/RIT1/AKR1C1/STC1/IL7R/AKR1C3/CXCL8/SLC7A11/PLK2/PSAT1/GLRX/AKR1B10/GDF15/INSIG1/ENO2/PIMREG/GFPT2/MT1F/BNIP3L/ATF3/LDLR/SEL1L3/EFNB2/CBS/STC2/FAM162A/JUN/HSPA1A/CLEC2B/PODXL/GRN/SPANXB1/DDIT4/MT1X/TRIB3/MT1E/DCBLD2/HSPA6/LMNB1/MAP1LC3B
HECKER_IFNB1_TARGETS	76	0.579567	2.04768	0.00025025	0.00296587	0.00166199	1941	tags=33%, list=7%, signal=31%	PROS1/IFI44L/IFI44/PDZK1IP1/LGALS3BP/CXCL8/IFIT3/IFI6/C3AR1/GBP1/TNFAIP6/IFIT1/SAMD9L/IFIT2/IFI35/SCO2/LAP3/IFI27/STAT1/OASL/TYMP/ISG15/DTX3L/EPSTI1/APOBEC3B
JAZAERI_BREAST_CANCER_BRCA1_VS_BRCA2_UP	48	0.633892	2.04581	0.000477897	0.00372637	0.00208815	3401	tags=42%, list=12%, signal=37%	LOX/IL1B/AFP/MAPRE1/SF3B4/IL18R1/CALU/HARS/NOC2L/PISD/GCAT/KDM5A/TUFM/MPV17L2/MPI/SPCS3/NCSTN/PAF1/IL17RA/PEF1
SCHLOSSER_MYC_TARGETS_AND_SERUM_RESPONSE_DN	48	0.633566	2.04476	0.000477897	0.00372637	0.00208815	4192	tags=52%, list=15%, signal=44%	BAG2/BYSL/TIMM17A/RRS1/FABP5/RSL1D1/PPAT/DDX21/AMD1/UTP18/CEBPZ/PRNP/DKC1/LDHA/RPP40/RPIA/PA2G4/PAICS/ODC1/EBNA1BP2/URI1/RAN/TRIM14/NOP14/FTSJ1
GERY_CEBP_TARGETS	115	0.541184	2.04181	0.000260552	0.00296587	0.00166199	2961	tags=43%, list=10%, signal=39%	C3/DCN/HMOX1/S100A8/SAA1/IFRD1/TFRC/GLRX/TNFAIP6/ACTA2/SAT1/TGOLN2/HTATIP2/ATF3/CYB5R1/ADSSL1/FOS/RDH11/CHORDC1/SSR1/NUS1/GLA/ANGPTL4/DNAJB9/IER2/TMEM45A/PLAUR/PRNP/PTX3/PROCR/NR1D1/DUSP1/GPCPD1/BAG3/ZFAND2A/SERPINB2/PEA15/HSPH1/RGS2/TRIB3/ABCD2/ACSL1/ALDH3A1/ECHS1/PLAT/SLFN12/HBEGF/MVD/PPARG/BCKDHB
REACTOME_RNA_POLYMERASE_III_TRANSCRIPTION_INITIATION_FROM_TYPE_3_PROMOTER	28	0.703022	2.03749	0.000226142	0.00296587	0.00166199	6150	tags=75%, list=22%, signal=59%	POLR3G/POLR3GL/SNAPC1/CRCP/SNAPC3/POLR1C/POLR3K/POLR3H/BRF2/POLR3A/POLR3F/POLR2K/SNAPC4/POLR2L/POLR3D/POLR2H/POLR2F/SNAPC5/POLR2E/POLR3B/SNAPC2
GAVIN_FOXP3_TARGETS_CLUSTER_T7	94	0.556249	2.03573	0.000257202	0.00296587	0.00166199	3391	tags=38%, list=12%, signal=34%	VIM/UGP2/AKR1B1/FTL/HCLS1/SAMSN1/ANXA6/SAR1A/PNP/PSMB8/AMD1/CYBA/NFKB2/PDRG1/CCT2/STAMBPL1/GUK1/ENO1/STAT1/CDC37/PRPS1/LONP1/FAM50A/ECH1/ATP5F1B/EIF3B/RTCB/PPM1M/SCART1/MARCKS/MRPL46/CCDC22/RUVBL1/NDUFA9/MYL6/LRPAP1
HAN_JNK_SINGALING_UP	31	0.686611	2.03508	0.000227998	0.00296587	0.00166199	1977	tags=42%, list=7%, signal=39%	ZEB1/LOX/IFIT3/TGFBI/TNC/IL1RL1/EFNB2/GBP3/DUSP1/JUN/IRF9/ISG15/SHOX2
REACTOME_RNA_POLYMERASE_I_TRANSCRIPTION_TERMINATION	31	0.686173	2.03378	0.000227998	0.00296587	0.00166199	5046	tags=68%, list=18%, signal=56%	POLR1E/TWISTNB/CCNH/TAF1A/GTF2H2/CD3EAP/ERCC2/POLR1C/UBTF/TAF1D/POLR2K/TAF1B/ZNRD1/TTF1/POLR1B/POLR2L/POLR2H/POLR2F/GTF2H5/GTF2H1/POLR2E
BOYAULT_LIVER_CANCER_SUBCLASS_G5_DN	27	0.705309	2.0336	0.000224065	0.00296587	0.00166199	2684	tags=56%, list=9%, signal=50%	IFI44/LAPTM5/TGM2/ICAM1/EZR/SEL1L3/CYBA/EMP3/RAB31/STAT1/CLEC2B/ARHGDIB/HMGN3/PTGER4/BCL3
KYNG_RESPONSE_TO_H2O2	68	0.587433	2.03299	0.000246305	0.00296587	0.00166199	4544	tags=46%, list=16%, signal=38%	HMOX1/SRGN/IFI6/MPV17/GDF15/GADD45A/SERPINH1/DNAJA1/CD59/CCND1/CCNH/CTSB/CFD/CUX1/PSMC4/SELENOP/ENG/PTGER4/SLC39A7/EID1/PTP4A3/TGFBR3/PFDN5/TSPAN4/RCC1/ANKRD1/PRKCSH/TAP1/SLC20A1/FLOT2/IL10RB
ABRAHAM_ALPC_VS_MULTIPLE_MYELOMA_UP	25	0.721253	2.03198	0.000222222	0.00296587	0.00166199	1555	tags=40%, list=5%, signal=38%	IGFBP3/DCN/HMOX1/SERPINA1/FGFR1/CCND1/RUNX2/JUN/TNFRSF1A/MAPK12
TARTE_PLASMA_CELL_VS_PLASMABLAST_DN	303	0.480435	2.0284	0.000323311	0.00296587	0.00166199	4793	tags=44%, list=17%, signal=37%	KYNU/CDKN1A/SOD2/TFRC/NFIL3/ACTA2/ANXA6/BYSL/TIMM17A/LSP1/RIPOR2/MVP/PNP/FABP5/LDLR/CCT6A/EIF2S1/PSMB8/MTHFD2/TDG/SSR1/GCLM/PSMC5/EIF3A/CASP1/PPP1R2/SLC19A1/PGK1/CDC20/BLMH/PPIF/KPNA2/CCT2/TOP1/GNL2/TYMS/PSMC3IP/TXN/RARS/CYCS/AIMP2/CCT5/HSPA4/EED/TMEM97/CKS2/RAB27A/SRSF3/EXOSC2/ANP32A/CLEC2B/TCP1/ZMAT2/CPOX/CTPS1/CCT4/TARS/ARHGDIB/IFI30/ITGB1/ATIC/EIF5/ELOC/PFKP/PTPN1/VDAC1/PSME2/PSMA5/FLNA/VBP1/…
LIU_VAV3_PROSTATE_CARCINOGENESIS_UP	75	0.574448	2.02697	0.000249688	0.00296587	0.00166199	1968	tags=32%, list=7%, signal=30%	C3/CFH/PLOD2/MME/SERPINA3/TIMP2/IFIT3/TGM2/CCN3/FN1/SAT1/TNC/GPX3/PSMB8/AMD1/CASP1/CDKN2C/LTF/TGFBR2/STAT1/PSMB10/PSMB9/FUS/ARHGDIB
GAURNIER_PSMD4_TARGETS	50	0.62255	2.02538	0.000478583	0.00372637	0.00208815	1363	tags=32%, list=5%, signal=31%	C3/CXCL8/IL1A/C3AR1/CXCL1/CXCL2/CCL20/B2M/CXCL3/IL18R1/NFKB2/IL1R2/RELB/HLA-B/IL21R/HLA-A
WANG_TARGETS_OF_MLL_CBP_FUSION_DN	41	0.644971	2.02528	0.0002331	0.00296587	0.00166199	4256	tags=66%, list=15%, signal=56%	CCDC86/FTSJ3/FABP5/G6PD/PSMC5/NRP1/DEGS1/NIPSNAP1/NMD3/GTPBP4/RASSF1/TRIAP1/RIOX2/HARS/CPOX/TMEM109/VDAC1/TSC22D1/LACTB/TTC27/UXS1/TOMM70/CTSZ/PPIC/DOCK8/RIC8A/CUL4A
REACTOME_RNA_POLYMERASE_I_PROMOTER_ESCAPE	82	0.56577	2.02438	0.000252781	0.00296587	0.00166199	5175	tags=45%, list=18%, signal=37%	HIST1H2AC/POLR1E/HIST1H2BK/HIST2H2AA4/HIST1H3G/HIST1H2BG/TWISTNB/CCNH/TAF1A/HIST1H2BD/HIST2H4A/GTF2H2/CD3EAP/ERCC2/POLR1C/UBTF/RRN3/HIST1H2BN/HIST2H2BE/TAF1D/HIST1H3H/H2AFX/POLR2K/TAF1B/ZNRD1/POLR1B/HIST1H2BJ/H2AFZ/POLR2L/POLR2H/HIST1H2BC/POLR2F/GTF2H5/CBX3/GTF2H1/POLR2E/HIST1H4A
KEGG_GLUTATHIONE_METABOLISM	42	0.641224	2.02042	0.000234907	0.00296587	0.00166199	3097	tags=45%, list=11%, signal=40%	GGT5/ANPEP/GSR/PGD/GPX3/G6PD/GCLM/MGST1/LAP3/RRM2B/GCLC/SRM/GSS/GSTO1/IDH1/SMS/ODC1/GSTA2/GSTZ1
REACTOME_ACTIVATION_OF_APC_C_AND_APC_C:CDC20_MEDIATED_DEGRADATION_OF_MITOTIC_PROTEINS	74	0.572852	2.02019	0.000247647	0.00296587	0.00166199	6503	tags=65%, list=23%, signal=50%	PSMB8/PSMC5/CDC20/PSME3/ANAPC7/PSMB10/BUB3/PSMA6/PSMC4/PSMB9/PSMD10/PSME2/PSMA5/CDC26/PSMD7/PSMD13/PSMB5/PSMD11/PSME1/ANAPC4/PSMA2/PSMA1/PSMC3/CDK1/RPS27A/PSMD2/CCNB1/UBC/PSMD4/UBE2C/PSMC2/PSMB6/PSMA7/PSMD12/PSMD14/PSMB4/UBA52/PSMB3/PSMA3/ANAPC2/MAD2L1/ANAPC5/ANAPC16/PSMC6/PSMB7/ANAPC11/PSMB1/PSMB2
JAEGER_METASTASIS_UP	42	0.640409	2.01785	0.000234907	0.00296587	0.00166199	2795	tags=43%, list=10%, signal=39%	PLOD2/MME/STC1/PAPSS2/ADAM12/FN1/AURKA/SLC16A3/NCBP2/NUDT9/TACC3/BGN/CKS2/SEPT6/DDAH1/KIF2C/SMC4/ENPP1
KIM_GLIS2_TARGETS_UP	70	0.579484	2.01751	0.000247463	0.00296587	0.00166199	2140	tags=29%, list=8%, signal=26%	C3/DCN/VIM/FBN1/TGFBI/PDGFRL/ICAM1/S100A4/LSP1/IFITM3/SOCS3/PSMB8/ANGPTL4/COL4A1/CMTM3/TGFBR2/ISG15/S100A6/PSMB9/OSMR
DANG_MYC_TARGETS_UP	127	0.528051	2.01494	0.000265957	0.00296587	0.00166199	5318	tags=49%, list=19%, signal=40%	TFRC/MAT2A/RPS6KA2/HSPA8/GAPDH/E2F3/METTL1/SURF6/SRSF7/PPAT/EIF2S1/DDX10/BAX/EIF4E/CEBPZ/FOSL1/MGST1/TOP1/PYCR1/TYMS/ENO1/RIOX2/TXN/HSPD1/AIMP2/DKC1/CCT5/HSPA4/LDHA/CKS2/IRF9/MRTO4/SMN1/SRM/PA2G4/EIF4A1/PRDX3/GNL3/PHB/NME1/CSTB/ODC1/PPID/HSPE1/H2AFZ/SRSF2/EXOSC8/RPL9/RCC1/RPS20/CCNB1/POLD2/NBN/UBE2C/APEX1/CBX3/FXN/UXT/SLC25A3/RPS19/EIF3C/NAP1L1
REACTOME_INTERLEUKIN_4_AND_INTERLEUKIN_13_SIGNALING	96	0.548981	2.01458	0.000255885	0.00296587	0.00166199	1359	tags=27%, list=5%, signal=26%	HMOX1/VIM/CDKN1A/ZEB1/SAA1/CXCL8/IL1A/IL1B/MUC1/FN1/ICAM1/CCND1/FOXO1/HIF1A/HSPA8/TWIST1/FGF2/VEGFA/FOS/SOCS3/PTGS2/LIF/IL13RA2/BCL2L1/SOCS1/STAT1
BOSCO_INTERFERON_INDUCED_ANTIVIRAL_MODULE	74	0.570972	2.01356	0.000247647	0.00296587	0.00166199	2461	tags=32%, list=9%, signal=30%	TNIP3/IFI44L/IFI44/SLC39A8/SDC3/IFIT3/IFI6/APOL1/IFIT1/PML/SAMD9L/IFITM3/SLAMF7/TRIM22/IFI35/CGAS/PRAF2/OASL/APOL6/UBE2Z/EPSTI1/TMEM106A/PNPT1/ST3GAL5
ELVIDGE_HIF1A_TARGETS_UP	66	0.584898	2.01339	0.000245881	0.00296587	0.00166199	3696	tags=44%, list=13%, signal=38%	LSG1/CCDC86/DNAJA1/RRS1/OSTM1/PNO1/AMD1/SLC35C1/RRP15/PSME3/TOR3A/CCND3/HSPA4/CHKA/RFK/POLR3K/CTPS1/HSPH1/RPP40/RRP12/TMEM33/SRM/SOBP/URB2/MRPS12/ABCF2/SLC5A6/WDR77/LARS2
KAMIKUBO_MYELOID_CEBPA_NETWORK	26	0.705539	2.01017	0.000447327	0.00362122	0.00202923	1289	tags=27%, list=5%, signal=26%	S100A8/S100A9/GLRX/PGD/DGAT2/RAB31/LTF
REACTOME_ACTIVATION_OF_NF_KAPPAB_IN_B_CELLS	64	0.586547	2.00852	0.000244559	0.00296587	0.00166199	7048	tags=70%, list=25%, signal=53%	IKBKG/PSMB8/PSMC5/PSME3/PSMB10/PSMA6/MAP3K7/PSMC4/PSMB9/PSMD10/PSME2/PSMA5/PSMD7/PSMD13/PSMB5/PSMD11/PSME1/PSMA2/PSMA1/PSMC3/RPS27A/PSMD2/SKP1/UBC/PSMD4/PSMC2/PSMB6/PSMA7/PSMD12/PSMD14/PSMB4/UBA52/PSMB3/PSMA3/PSMC6/PSMB7/NFKBIE/NFKBIB/PSMB1/CHUK/PSMB2/RELA/NFKBIA/PSMD1/SEM1
CONCANNON_APOPTOSIS_BY_EPOXOMICIN_UP	229	0.487758	2.00676	0.000294811	0.00296587	0.00166199	2951	tags=37%, list=10%, signal=33%	HMOX1/C1S/CDKN1A/RIT1/AKR1C1/SQSTM1/AKR1C3/TNFSF9/SLC7A11/PLK2/IFRD1/GSR/TAF13/NQO1/GDF15/ME1/GADD45A/MAP1B/DUSP3/SERPINH1/MDM2/ACTA2/SAT1/SUSD5/ABLIM3/TSPAN9/GPX3/DNAJC2/ATF3/DOK1/SLC16A3/GOSR2/PGF/STIP1/SEL1L3/CYB5R1/FOS/DNAJB4/DUSP4/GEM/GCLM/JMJD6/PHLDA2/GLA/SLC38A6/ARHGEF2/TNFRSF10B/CREB5/YKT6/STK17A/MIR22HG/DUSP1/TGFBR2/JUN/SMOX/SRP19/TTC1/HSPA4/HSPA1A/SERPINB8/HSPH1/TOM1/P4HA2/DAP3/PHTF1/CR…
BURTON_ADIPOGENESIS_5	114	0.532921	2.00647	0.000260756	0.00296587	0.00166199	3851	tags=42%, list=14%, signal=37%	C3/ADAM12/TIMM17A/FABP5/XBP1/RMDN3/G6PD/HK2/SIPA1/GRPEL1/PPIF/DNAJB9/TIMM8A/ESRRA/TOB1/PRPS1/TMEM97/RPP14/PRELID3B/TALDO1/MTX2/MRPL18/AK2/PSMA5/CYC1/TIMM23/PRDX3/ACSL1/MRPL20/ECHS1/NDUFA8/PHB2/ACO2/PHB/COQ9/PPARG/MRPL34/UQCR11/POR/SLC5A6/PSMA1/ETFB/ATP5MD/GYS1/TIMM9/PEX14/MRPL12/CISD1
WANG_METASTASIS_OF_BREAST_CANCER_ESR1_DN	30	0.680159	2.00641	0.000226603	0.00296587	0.00166199	1968	tags=27%, list=7%, signal=25%	C3/CLN8/TACC2/DUSP4/GOLM1/ZFP36L2/PHF11/ARHGDIB
REACTOME_CRISTAE_FORMATION	31	0.676889	2.00626	0.000227998	0.00296587	0.00166199	6178	tags=74%, list=22%, signal=58%	SAMM50/DNAJC11/CHCHD3/ATP5PD/ATP5F1B/ATP5F1E/MTX2/ATP5MC2/ATP5MC1/MTX1/MICOS10/ATP5PO/TMEM11/ATP5F1D/DMAC2L/ATP5PB/ATP5F1C/IMMT/ATP5MC3/ATP5F1A/MICOS13/ATP5MG/APOO
REACTOME_RESPIRATORY_ELECTRON_TRANSPORT	99	0.544086	2.00482	0.000257202	0.00296587	0.00166199	7346	tags=65%, list=26%, signal=48%	SCO1/COQ10B/COX20/NDUFAF4/TMEM126B/CYCS/COX7A2L/ACAD9/NDUFB5/CYC1/NDUFA8/TACO1/UQCR11/NDUFA12/NDUFA9/ETFB/NDUFV3/NDUFA6/COX16/NDUFA13/SDHA/TIMMDC1/NDUFB2/NDUFS3/NDUFA10/NDUFB9/NDUFAF1/NDUFAF2/NDUFB3/NDUFB1/UQCRQ/NDUFC2/NDUFA3/COX5B/NDUFAF3/NDUFS2/NDUFB8/NDUFS6/SDHD/NDUFA11/UQCR10/NDUFS5/NDUFA4/UQCRB/NDUFV1/UQCRFS1/NDUFAB1/NDUFS4/COX7C/ECSIT/COX7B/NDUFB11/UQCRH/SURF1/SDHB/SDHC/NDUFB6/COX4I1/NDUFS7…
ONDER_CDH1_SIGNALING_VIA_CTNNB1	83	0.558737	2.00258	0.000253036	0.00296587	0.00166199	908	tags=33%, list=3%, signal=32%	C3/IGFBP3/SAA1/CADM3/MMP19/CXCL8/SYBU/BIRC3/FBN1/FERMT2/AOX1/TFRC/KDELR3/MAP1B/ACKR1/ICAM1/TAGLN/ACTA2/FBLN5/LTBP1/CXCL1/CD83/CXCL2/BIN1/TNFAIP3/STC2/ANOS1
GARGALOVIC_RESPONSE_TO_OXIDIZED_PHOSPHOLIPIDS_BLUE_UP	138	0.517483	1.99894	0.000269179	0.00296587	0.00166199	2995	tags=36%, list=11%, signal=33%	CXCL8/TNFSF9/PMAIP1/SRXN1/IFRD1/NFIL3/SAMSN1/DNAJA1/ESM1/PNP/MAFG/ATF3/GPAT3/RSL1D1/STIP1/F3/CXCL3/CHORDC1/JMJD6/GLA/MTHFD2L/DNAJB9/RELB/FGFR1OP2/FOSL1/PLAUR/RTCA/YRDC/STK17A/MIR22HG/AIFM2/BAG3/E2F6/ZFAND2A/HERPUD1/C16orf72/HSPA1A/HSPH1/EID3/CREM/BRF2/EIF5/KBTBD8/AHSA1/HSPA6/RGMB/MAP1LC3B/HBEGF/RRP7A/AKIRIN2
JISON_SICKLE_CELL_DISEASE_UP	173	0.501982	1.99717	0.00028177	0.00296587	0.00166199	2860	tags=35%, list=10%, signal=32%	HMOX1/KYNU/CDKN1A/RIT1/IFI44/IFIT3/SLC22A4/GBP1/TXNRD1/GADD45A/IFIT1/FN1/CLIC2/ABLIM3/UBE2L6/TIMM17A/BNIP3L/HTATIP2/RGL1/ATF3/DOK1/IFIT2/GNPDA1/IFI35/TRIP6/CTSA/GNG11/PSMB8/PLIN3/EMP3/ITGB3/P4HB/PRDX1/GAS2L1/TXN/STAT1/HLA-A/DESI1/SMOX/OASL/TYMP/PTPRO/ATP6V1D/RAB13/PSMB9/PPP2CB/TALDO1/IFI30/PSME2/C6orf120/GUCY1B1/CASP7/CLIC4/ST3GAL5/LMNB1/TMED1/BST2/GSTO1/LIPA/MYL9/RRP7A
REACTOME_ANTIGEN_PROCESSING_CROSS_PRESENTATION	97	0.543197	1.99655	0.000256213	0.00296587	0.00166199	6503	tags=63%, list=23%, signal=49%	IKBKG/NCF2/SEC22B/B2M/PSMB8/PSMC5/CYBA/VAMP3/PSME3/HLA-B/TAP2/HLA-A/PSMB10/AC080038.1/SEC61A1/PSMA6/PSMC4/PSMB9/PSMD10/TLR4/PSME2/PSMA5/PSMD7/PSMD13/PSMB5/CD14/PSMD11/PSME1/HLA-C/PSMA2/PSMA1/PSMC3/FCGR1B/SEC61G/RPS27A/PSMD2/STX4/TAP1/BTK/UBC/PSMD4/CALR/PSMC2/PSMB6/PSMA7/PSMD12/PSMD14/SEC61B/PSMB4/UBA52/PSMB3/PSMA3/MYD88/CTSL/PSMC6/PSMB7/HLA-F/LY96/PSMB1/CHUK/PSMB2
HINATA_NFKB_TARGETS_KERATINOCYTE_UP	82	0.557835	1.99599	0.000252781	0.00296587	0.00166199	1162	tags=35%, list=4%, signal=34%	KRT14/VIM/CDKN1A/SAA1/IL7R/CXCL8/SOD2/WNT5A/IL32/IL1B/GBP1/GADD45A/TNFAIP6/FN1/ICAM1/TNIP1/CYP27B1/TNC/ESM1/CD83/GPRC5B/VEGFA/CCL20/PLAU/CXCL3/TNFAIP3/CCNH/ERCC1/PTX3
CHIARADONNA_NEOPLASTIC_TRANSFORMATION_KRAS_CDC25_DN	48	0.618262	1.99537	0.000477897	0.00372637	0.00208815	1515	tags=31%, list=5%, signal=30%	C3/PROS1/LOX/SAA1/CCDC80/NSG1/IL1R1/TNC/IL1RL1/FOS/PTGS2/MAGED1/CCN5/PTX3/ZFP36L2
REACTOME_RESPIRATORY_ELECTRON_TRANSPORT_ATP_SYNTHESIS_BY_CHEMIOSMOTIC_COUPLING_AND_HEAT_PRODUCTION_BY_UNCOUPLING_PROTEINS	122	0.524216	1.99211	0.000262467	0.00296587	0.00166199	7346	tags=64%, list=26%, signal=48%	SCO1/COQ10B/COX20/NDUFAF4/TMEM126B/CYCS/ATP5PD/ATP5F1B/COX7A2L/ACAD9/NDUFB5/ATP5F1E/ATP5MC2/CYC1/NDUFA8/ATP5MC1/TACO1/UQCR11/NDUFA12/NDUFA9/ETFB/NDUFV3/NDUFA6/COX16/ATP5PO/NDUFA13/SDHA/TIMMDC1/ATP5F1D/DMAC2L/ATP5PB/NDUFB2/NDUFS3/NDUFA10/ATP5F1C/NDUFB9/ATP5MC3/NDUFAF1/NDUFAF2/NDUFB3/NDUFB1/UQCRQ/NDUFC2/NDUFA3/COX5B/NDUFAF3/NDUFS2/NDUFB8/ATP5F1A/NDUFS6/SDHD/NDUFA11/UQCR10/NDUFS5/NDUFA4/UQCRB/NDUFV1…
REACTOME_ABC_TRANSPORTER_DISORDERS	74	0.564085	1.98928	0.000247647	0.00296587	0.00166199	5167	tags=49%, list=18%, signal=40%	ABCC2/ERLIN1/PSMB8/PSMC5/PSME3/PSMB10/VCP/PSMA6/PSMC4/PSMB9/PSMD10/PSME2/PSMA5/PSMD7/PSMD13/PSMB5/ERLEC1/PSMD11/PSME1/PSMA2/PSMA1/PSMC3/RPS27A/PSMD2/UBC/PSMD4/PSMC2/PSMB6/PSMA7/PSMD12/PSMD14/PSMB4/DERL2/UBA52/PSMB3/PSMA3
MOREAUX_B_LYMPHOCYTE_MATURATION_BY_TACI_DN	76	0.562879	1.98871	0.00025025	0.00296587	0.00166199	6427	tags=55%, list=23%, signal=43%	ASF1A/SGO2/CCT2/LAP3/TYMS/AIMP2/DKC1/CCT5/NUDT5/DDX1/EIF3G/RNF7/TIMM50/TMEM126A/KEAP1/UTP4/MRPS12/CHMP4A/EBNA1BP2/THYN1/TDP2/G3BP1/SSBP1/C1orf131/CDK1/RAN/NDUFA13/PAAF1/NASP/TBCB/SLC16A1/NMT1/EMC4/MALSU1/PRKDC/CYP2R1/CMC1/RPL26L1/EZH2/CHCHD1/CBWD1/TEFM
REACTOME_REGULATION_OF_RUNX2_EXPRESSION_AND_ACTIVITY	70	0.570836	1.9874	0.000247463	0.00296587	0.00166199	5167	tags=61%, list=18%, signal=50%	TWIST1/RUNX2/PSMB8/PSMC5/PSME3/ESRRA/STAT1/STUB1/PSMB10/PSMA6/PSMC4/PSMB9/PSMD10/PSME2/HIVEP3/PSMA5/NKX3-2/PSMD7/PSMD13/PSMB5/PSMD11/PSME1/PSMA2/PSMA1/PSMC3/RPS27A/PSMD2/SKP1/PPARGC1B/UBC/PSMD4/RBX1/PSMC2/PSMB6/PSMA7/BMP2/PSMD12/PSMD14/CBFB/PSMB4/UBA52/PSMB3/PSMA3
VERHAAK_GLIOBLASTOMA_MESENCHYMAL	205	0.488611	1.98572	0.000285063	0.00296587	0.00166199	2552	tags=31%, list=9%, signal=29%	SERPINA1/KYNU/ITGA5/LOX/LAPTM5/MAFB/COLGALT1/TGFBI/IL1R1/ADAM12/HEXA/S100A4/IL15RA/SAT1/LTBP1/MVP/CASP8/TGOLN2/NCF2/RUNX2/UAP1/ALDH3B1/FMNL1/SLC16A3/TRIM22/PLAU/CASP4/LAMB1/TNFAIP3/FHOD1/SP100/CASP1/NRP1/MAN1A1/EMP3/RELB/PLK3/PLAUR/RBMS1/PROCR/CTSB/PLA2G15/TGFBR2/TNFRSF1A/AC080038.1/FXYD5/TYMP/RAB27A/PHF11/CLEC2B/MGAT1/SLAMF8/P4HA2/GRN/IFI30/TLR4/HEXB/THBD/LCP1/ENG/DCBLD2/PTGER4/ACSL1/WWTR1
MALONEY_RESPONSE_TO_17AAG_DN	77	0.560163	1.98122	0.000251256	0.00296587	0.00166199	5549	tags=55%, list=19%, signal=44%	ARF4/SRSF7/CCT6A/KPNA2/TMSB4X/PTGES3/CYCS/LDHA/DYNLL1/SRSF3/CALM2/CLTA/BABAM2/GTF2A2/CA12/SNCA/PSMA5/PA2G4/SEC62/TIMM23/EIF4A1/PRDX3/VDAC3/SUB1/TPI1/ABCE1/SSB/SNRPE/SRSF2/POLR2L/PDCD5/XRCC5/ATP5F1C/MDH1/UBE2C/PSMA7/HNRNPM/HNRNPAB/SNRPF/RBMX/ELOB/MAD2L1
PODAR_RESPONSE_TO_ADAPHOSTIN_UP	149	0.507021	1.97781	0.000273898	0.00296587	0.00166199	2219	tags=31%, list=8%, signal=29%	IGFBP3/HMOX1/ZEB1/AKR1C1/SQSTM1/AKR1C3/CDKN1C/TNFSF9/SLC7A11/PMAIP1/IFRD1/PSAT1/GLRX/FTH1/GADD45A/CLIC2/SAT1/MGAT2/NCF2/MAFG/ATF3/VEGFA/ASF1A/DNAJB4/HIST1H2BG/GCLM/GLA/CHAC1/DNAJB9/NLRP1/RPS6KC1/MIR22HG/IER5/DUSP1/HSPA13/JUN/C16orf72/HSPA1A/CLEC2B/ACTR10/DUSP5/P4HA2/RGS2/CREM/DDIT4/TRIB3
BURTON_ADIPOGENESIS_2	65	0.575888	1.97608	0.000246002	0.00296587	0.00166199	4111	tags=49%, list=14%, signal=42%	ITGA5/UGDH/SNAI1/SRXN1/IL1R1/PGD/FTSJ3/GRWD1/IL1RL1/RASA3/NOP56/NSUN2/COL4A1/FOSL1/CCND3/LIMK1/PRKCE/SLC6A6/HSPH1/SPHK1/SRM/PA2G4/RBM14/SAR1B/GSTO1/TGFBR3/PRDX6/SFPQ/MAP3K6/PTGES/TLE1/SERP1
SHIPP_DLBCL_VS_FOLLICULAR_LYMPHOMA_UP	45	0.619067	1.97587	0.000237192	0.00296587	0.00166199	2942	tags=51%, list=10%, signal=46%	TFRC/PLOD1/SAT1/MTHFD2/KPNA2/P4HB/PRDX1/ENO1/PKM/HSPD1/CCT5/LDHA/ALDOA/CLTA/IFI30/ATIC/CCT3/PFKP/PSME2/PGAM1/HSP90AA1/NME1/HSP90AB1
ZHAN_MULTIPLE_MYELOMA_SUBGROUPS	30	0.669707	1.97557	0.000226603	0.00296587	0.00166199	6916	tags=80%, list=24%, signal=61%	UGP2/UBE2V2/DFFA/EIF2S1/TYMS/CCT4/EIF2B1/ACO2/FKBP1A/CKS1B/SNRPC/POLD2/PRKDC/RANBP1/PSMD14/MTIF2/GGT1/C1D/XRCC6/EZH2/CSNK2B/CDC6/EWSR1/FNTA
BARRIER_COLON_CANCER_RECURRENCE_UP	39	0.634166	1.97265	0.000230947	0.00296587	0.00166199	4640	tags=56%, list=16%, signal=47%	CFH/COPS8/SLCO4A1/KDELR3/FOXO1/TIMM17A/SAR1A/ERGIC2/DNAJC12/CIAO1/THOC2/SEC62/UGGT1/SRP72/CNPY2/NME7/PWP1/WDHD1/PDHB/PSMC2/XPNPEP1/TENT5A
ZHOU_TNF_SIGNALING_4HR	53	0.598201	1.97217	0.000239349	0.00296587	0.00166199	3824	tags=40%, list=13%, signal=34%	SOD2/FBN1/IL32/GADD45A/TNIP1/CD59/CXCL1/PSMB8/PRDX1/ELOVL5/FAM50A/PRELID3B/SF3A3/ITGB1/TSPAN3/CLIC4/TGFBR3/MYL12A/MYL6/PTGES/DROSHA
MISSIAGLIA_REGULATED_BY_METHYLATION_UP	121	0.519168	1.96991	0.00026295	0.00296587	0.00166199	2713	tags=40%, list=10%, signal=36%	IGFBP3/CDKN1A/IFI44L/SQSTM1/SOD2/BIRC3/MFGE8/HIST1H2AC/PON2/AREG/IL32/IL1B/GADD45A/IFIT1/MMP15/SAT1/UBE2L6/HIST1H2BK/ARF4/ATF3/PSAP/CCL20/TNFAIP3/PTGS2/SP110/LGALS9/PLAUR/ARL6IP5/RRBP1/MIR22HG/DUSP1/CTSB/BLZF1/NEU1/STAT1/BECN1/ISG15/PISD/DUSP5/P4HA2/GRN/TRIM21/ATP6V0E1/ST3GAL5/BST2/MAP1LC3B/PLAT/MYRIP
REACTOME_REGULATION_OF_INSULIN_LIKE_GROWTH_FACTOR_IGF_TRANSPORT_AND_UPTAKE_BY_INSULIN_LIKE_GROWTH_FACTOR_BINDING_PROTEINS_IGFBPS	111	0.524949	1.96979	0.000259134	0.00296587	0.00166199	1959	tags=29%, list=7%, signal=27%	C3/IGFBP3/SERPINA1/CDH2/FBN1/PAPPA/MFGE8/MSLN/APOL1/FUCA2/PRSS23/QSOX1/AFP/FN1/TNC/LTBP1/TGOLN2/TMEM132A/FSTL1/LAMB1/SDC2/GOLM1/STC2/RCN1/CALU/P4HB/CKAP4/FSTL3/CSF1/IGFBP4/PAPPA2/GAS6
KRIGE_AMINO_ACID_DEPRIVATION	28	0.679476	1.96925	0.000452284	0.00364703	0.00204369	2219	tags=50%, list=8%, signal=46%	CDKN1A/CXCL8/SLC7A11/PSAT1/GADD45A/ATF3/VEGFA/ATF5/CBS/CHAC1/STC2/ASS1/DDIT4/TRIB3
NEMETH_INFLAMMATORY_RESPONSE_LPS_UP	74	0.558267	1.96876	0.000247647	0.00296587	0.00166199	1522	tags=36%, list=5%, signal=35%	SRGN/CDKN1A/SQSTM1/TNFSF9/HCLS1/IFRD1/GLRX/C3AR1/TXNRD1/TNIP1/PML/SAT1/PNP/ATF3/IL1RL1/PTGS2/ACSL4/STK10/RCN1/IER2/DEGS1/BCL2L1/TPST1/TOP1/STAT1/SAP30/IER3
GHANDHI_DIRECT_IRRADIATION_UP	98	0.534407	1.96805	0.000255754	0.00296587	0.00166199	2728	tags=38%, list=10%, signal=34%	KYNU/CDKN1A/PTGFR/CXCL8/SOD2/BIRC3/SLC7A11/TIGAR/AEN/IL1A/HSD11B1/IL1B/GDF15/GADD45A/MDM2/CXCL1/FGF2/CXCL2/CXCL3/TNFAIP3/PTGS2/LIF/RELB/DUSP2/TNFRSF10B/CREB5/TRIAP1/RRM2B/SERPINB2/LRP8/MT1X/VWCE/MT1E/NAMPT/FAS/MMP3/IL12A
KUROZUMI_RESPONSE_TO_ONCOCYTIC_VIRUS	30	0.666562	1.9663	0.00067981	0.00473854	0.00265534	956	tags=17%, list=3%, signal=16%	C3/IL1A/IL1B/CASP1/IL1R2
SENESE_HDAC1_AND_HDAC2_TARGETS_UP	235	0.476615	1.964	0.000300842	0.00296587	0.00166199	2316	tags=27%, list=8%, signal=25%	C3/SERPINA1/SRGN/KYNU/SAA1/LAPTM5/IL7R/CXCL8/HAS2/BIRC3/TGM2/IL1A/SNHG16/TFRC/DKK2/ZC3H12A/TMOD1/FN1/CES1/CAPN5/PAX8/GFPT2/GPAT3/SLC16A3/CCL20/PGF/CHRNA9/STIP1/PLAU/CXCL3/TNFAIP3/GEM/PAX8-AS1/NUS1/STK10/PPIF/ITPKA/NFKB2/PLEKHB2/IL13RA2/FOSL1/PLAUR/TNFRSF10B/BCL2L1/CEP170/PTX3/TGFBR2/PRPF6/GPR3/SERPINB2/ULBP2/SEC61A1/ANTXR2/RBPMS2/OTUB2/ADPRHL1/RGS2/CREM/SPHK1/HHIP/OSMR/TNFRSF11B/SLC39A4/CDV3
SIMBULAN_PARP1_TARGETS_UP	29	0.671313	1.96393	0.000452899	0.00364703	0.00204369	388	tags=34%, list=1%, signal=34%	DCN/COL8A1/SERPINE2/CDKN1A/TIMP2/CCN3/MFAP5/MDM2/CCND1/GPX3
SPIRA_SMOKERS_LUNG_CANCER_UP	36	0.64054	1.96362	0.000229043	0.00296587	0.00166199	1394	tags=31%, list=5%, signal=29%	SERPINA1/SLC39A8/CXCL8/PPBP/CXCL2/FOS/ATP6AP2/DNAJC12/CCT2/ARL6IP5/TOB1
AMIT_EGF_RESPONSE_240_HELA	59	0.582607	1.96245	0.000242248	0.00296587	0.00166199	2684	tags=41%, list=9%, signal=37%	ZEB1/SYDE1/IL7R/PCDH7/SLC7A11/PLK2/MAT2A/TXNRD1/FGF2/GFPT2/TM4SF1/EZR/FARSA/RBMS1/YKT6/TOP1/TNFRSF1A/LRP8/PDLIM5/RGS2/CREM/THOC1/FHL3/BCL3
REACTOME_DEGRADATION_OF_GLI1_BY_THE_PROTEASOME	57	0.585648	1.96061	0.000242307	0.00296587	0.00166199	7048	tags=72%, list=25%, signal=54%	PSMB8/PSMC5/PSME3/PSMB10/PSMA6/PSMC4/PSMB9/PSMD10/PSME2/PSMA5/PSMD7/PSMD13/PSMB5/PSMD11/PSME1/PSMA2/PSMA1/PSMC3/RPS27A/PSMD2/SKP1/UBC/PSMD4/GLI1/RBX1/PSMC2/PSMB6/PSMA7/PSMD12/PSMD14/PSMB4/UBA52/PSMB3/PSMA3/PSMC6/PSMB7/PSMB1/PSMB2/PRKACB/PSMD1/SEM1
NEWMAN_ERCC6_TARGETS_UP	25	0.695809	1.9603	0.000444444	0.00360743	0.0020215	519	tags=36%, list=2%, signal=35%	KYNU/CXCL8/SLC7A11/PMAIP1/TNFAIP6/GPAT3/FABP5/CXCL2/IFIT2
DASU_IL6_SIGNALING_UP	60	0.580267	1.95962	0.000243309	0.00296587	0.00166199	3810	tags=50%, list=13%, signal=43%	TRIM16/CXCL8/SOD2/HIST1H2AC/ANPEP/TNFAIP6/RGL1/CXCL3/GEM/SERPINB2/ZFP36L2/IER3/CKS2/IRF9/HSPA1A/HTRA1/GAS6/IFI30/ATP2B1/ENG/HIST2H2BE/MMP3/NAGPA/AGRN/MAP2K2/NMB/STMN2/CEBPB/PTGES/ZFP36
KEGG_FRUCTOSE_AND_MANNOSE_METABOLISM	32	0.656607	1.95758	0.000456413	0.00366568	0.00205414	2883	tags=38%, list=10%, signal=34%	AKR1B1/ALDOC/AKR1B10/HK2/SORD/PFKFB3/HK1/ALDOA/PHPT1/PFKP/TPI1/MPI
AMIT_EGF_RESPONSE_120_MCF10A	41	0.6234	1.95754	0.0002331	0.00296587	0.00166199	2787	tags=49%, list=10%, signal=44%	IL1A/IL1B/TXNRD1/GDF15/CCL20/ENC1/BAX/LIF/FOSL1/PLAUR/YRDC/SPRY4/SERPINB2/PDLIM5/EPHA2/AP1S1/TRIM21/CDV3/DYNC1LI1/HBEGF
REACTOME_REGULATION_OF_RUNX3_EXPRESSION_AND_ACTIVITY	53	0.593627	1.95709	0.000239349	0.00296587	0.00166199	5167	tags=62%, list=18%, signal=51%	MDM2/PSMB8/PSMC5/PSME3/PSMB10/PSMA6/PSMC4/PSMB9/PSMD10/PSME2/PSMA5/PSMD7/PSMD13/PSMB5/PSMD11/PSME1/PSMA2/PSMA1/PSMC3/RPS27A/PSMD2/UBC/PSMD4/PSMC2/PSMB6/PSMA7/PSMD12/PSMD14/CBFB/PSMB4/UBA52/PSMB3/PSMA3
SWEET_KRAS_ONCOGENIC_SIGNATURE	83	0.545856	1.95642	0.000253036	0.00296587	0.00166199	5582	tags=42%, list=20%, signal=34%	CDKN1A/PON2/TGFBI/GLRX/SFTPB/GADD45A/CCND1/HIF1A/TGOLN2/PHLDA2/MAN1A1/PHLDA1/FEZ2/KRT8/RABGGTB/PHB2/LAMC1/EEF1D/EEF1B2/EIF3E/GNS/PDK3/ATP5PB/ATP1B1/FCGR2A/NMT1/FKBP2/RPL8/BOP1/ACLY/MANF/MTIF2/TSTA3/BSG/SHC1
PHONG_TNF_TARGETS_UP	63	0.571383	1.95169	0.000243191	0.00296587	0.00166199	1963	tags=46%, list=7%, signal=43%	CXCL8/BIRC3/PLK2/ICAM1/CXCL1/ATF3/CD83/CXCL2/ADAMTS9/CCL20/LDLR/PLAU/FOS/CXCL3/TNFAIP3/GEM/LIF/IER2/NFKB2/TNFRSF10B/PTX3/IER5/DUSP1/JUN/ZFP36L2/IER3/EPHA2/DUSP5/KLF10
KEGG_CYTOSOLIC_DNA_SENSING_PATHWAY	37	0.633206	1.95155	0.000459876	0.00368382	0.00206431	4023	tags=43%, list=14%, signal=37%	IL1B/POLR3G/IKBKG/POLR3GL/CASP1/TMEM173/POLR1C/POLR3K/POLR3H/RIPK1/IKBKE/POLR3A/POLR3F/IRF3/POLR3D/TREX1
DACOSTA_UV_RESPONSE_VIA_ERCC3_UP	312	0.45908	1.9495	0.000320307	0.00296587	0.00166199	4547	tags=41%, list=16%, signal=35%	SQSTM1/CDKN1C/TNFSF9/TNFRSF10D/PMAIP1/MAT2A/PVR/IFIT1/NPTXR/PLEKHO2/DUSP3/SERPINH1/EPHX1/SAT1/IFITM2/PNP/ATF3/GPRC5B/PCDH9/ALDH1B1/SYNM/RSL1D1/PGF/UROS/CYB5R1/TP53I3/FADS1/NCLN/ZNF330/NCBP2/PRPF4/PHLDA2/CCDC85B/NOP2/PPIF/ERCC1/PIM2/SCO2/CDKN2C/ALAS1/YKT6/ACOT2/NCDN/TYMS/TPBG/TRIAP1/PSMC3IP/ERCC2/DAXX/NEU1/HLA-A/TOB1/CCND3/PSMB10/PQBP1/TRIM13/NR4A1/HYAL2/HSPA1A/ISG15/OGG1/FEN1/MGAT1/ALDOA/TMEM109/…
SHEPARD_CRUSH_AND_BURN_MUTANT_UP	195	0.482231	1.9476	0.000281611	0.00296587	0.00166199	3801	tags=48%, list=13%, signal=42%	S100A8/SNAI1/DNTTIP2/FN1/SERPINH1/MDM2/NIP7/FTSJ3/SAT1/CYP27B1/POLR1E/RPF2/ZPR1/CASP8/RRS1/ATF3/NOL6/FOS/RPS27L/PTGS2/DUSP4/BAX/TSR1/PPAN/HEATR3/ZNF330/WDR12/SSR1/SAMM50/PHLDA2/NOL8/RRP9/UTP3/PTRH2/LYRM1/NSUN2/NLE1/EIF4E/PLK3/CCDC58/PFKFB3/DNAJA3/IMP4/TRMT1/TOMM20/PINX1/TOB1/JUN/ZNF622/HSPA4/HARS2/CHCHD10/SEC23B/TAF9/MYBBP1A/DDX51/DUSP5/GAR1/HAUS2/GATD3A/CYP26A1/SRPRB/JDP2/BUD23/WDR46/NOL7/MRPL52…
HOUSTIS_ROS	32	0.65243	1.94512	0.000684619	0.00474294	0.00265781	1299	tags=31%, list=5%, signal=30%	HMOX1/FTL/SOD2/GSR/GLRX/TXNRD1/GPX3/GCLM/PRDX1/TXN
YAO_TEMPORAL_RESPONSE_TO_PROGESTERONE_CLUSTER_17	181	0.485179	1.94142	0.000282087	0.00296587	0.00166199	6336	tags=58%, list=22%, signal=45%	SERPINA1/TXNRD1/ARF4/CYB5R1/IFI35/GCLM/SAMM50/ALDH9A1/GRPEL1/EEF1AKMT1/FAM162A/STUB1/MAP3K7/POLR3K/MRPL21/TMEM109/DOHH/TALDO1/HMBS/DDX1/RNF7/MRPL18/SLC39A4/ADSL/EIF4E2/UBE2S/VDAC3/BPGM/PSMD13/PHB2/KRT10/MRPS12/UBL4A/RUVBL1/YIPF5/CENPB/MRPL34/WTAP/MRPS22/CCDC12/FKBP1A/CMBL/MRPS11/MRPL16/MRPS14/LRPAP1/URI1/CKS1B/TRAPPC4/EIF4A3/COPS6/TOMM70/SRSF9/MRPL58/SERF2/SLIRP/TUBB/ACTB/XRCC5/NDUFS3/LIAS/NDUFB9…
RUTELLA_RESPONSE_TO_HGF_VS_CSF2RB_AND_IL4_UP	381	0.449024	1.93915	0.000339905	0.00296587	0.00166199	2974	tags=30%, list=10%, signal=27%	C3/PID1/TNIP3/C1S/KYNU/AKR1C1/S100A9/SQSTM1/AKR1B1/CDKN1C/MAFB/SOD2/SLC7A11/TIMP2/TGM2/DNTTIP2/IL1A/GSR/TFRC/HSD11B1/NQO1/IL1B/IFI6/C3AR1/FTH1/ME1/TNFAIP6/CES1/CYP27B1/ABCC3/CCND1/SNTB1/IFITM2/CXCL1/FPR1/MT1F/PNP/RGL1/METTL1/SLAMF7/DECR1/ACO1/SEC22B/ELOA/CHPF2/RDH11/EIF2S1/CXCL3/FADS1/SDC2/ITPR1/GCLM/VNN1/SIGIRR/CASP1/GLA/SMIM7/NRP1/SP140L/HK2/GRPEL1/PPIF/ANOS1/SP110/NR1H3/SCO2/ALAS1/TPST1/PRDX1/…
REACTOME_TRNA_AMINOACYLATION	42	0.615243	1.93855	0.000234907	0.00296587	0.00166199	4566	tags=52%, list=16%, signal=44%	VARS/FARSA/MARS2/AIMP1/RARS/AARS/HARS/AIMP2/HARS2/KARS/TARS/NARS/EARS2/SARS2/GARS/EPRS/AARS2/CARS/LARS2/FARS2/LARS/PPA2
SHEDDEN_LUNG_CANCER_POOR_SURVIVAL_A6	449	0.441534	1.93715	0.000356633	0.00298207	0.00167107	5142	tags=39%, list=18%, signal=32%	PLOD2/STC1/SOD2/PMAIP1/FAM216A/PSAT1/EGLN3/PVR/AFP/DNAJA1/POLR3G/UBE2V2/PAX8/PIMREG/ESM1/NEIL3/GAPDH/SAR1A/PNP/AURKA/MRPL42/VEGFA/SLC16A3/GTSE1/ZWINT/CBS/PPAT/SNX6/MTHFD2/TSR1/WDR62/SLC9A2/LRIF1/STC2/HK2/PGK1/CDC20/PPIF/PSME3/UGT8/TIMM8A/FGFR1OP/SHCBP1/CDKN2C/KPNA2/YKT6/RTCA/TACC3/TYMS/HCCS/PKM/CIAO1/GABPB1/DDA1/SAP30/BUB3/PRPS1/CCT5/CALM3/CKS2/HELLS/TMEM38B/WDR43/PBK/EXOSC2/TCP1/PRMT1/CMAS/GLMN/…
HALMOS_CEBPA_TARGETS_UP	44	0.609729	1.93595	0.000237248	0.00296587	0.00166199	2511	tags=39%, list=9%, signal=35%	IGFBP3/HMOX1/CXCL8/IL1R1/GLRX/NFIL3/UAP1/CXCL2/CCL20/CXCL3/PTGS2/PTX3/CKAP4/RAB27A/RGS2/FAS/ARL4A
HINATA_NFKB_TARGETS_FIBROBLAST_UP	77	0.54684	1.9341	0.000251256	0.00296587	0.00166199	1539	tags=32%, list=5%, signal=31%	VIM/CDH2/CXCL8/SOD2/IL1B/GADD45A/MAP1B/FN1/ICAM1/CXCL1/FGF2/CD83/VEGFA/CCL20/CXCL3/TNFAIP3/FGF5/CCNH/ERCC1/NFKB2/RELB/PTX3/SERPINB2/IER3/EXOSC9
KEGG_LEISHMANIA_INFECTION	57	0.577501	1.93334	0.000242307	0.00296587	0.00166199	2110	tags=23%, list=7%, signal=21%	C3/IL1A/IL1B/NCF2/FOS/PTGS2/CYBA/STAT1/JUN/MAPK12/MAP3K7/ITGB1/TLR4
WEST_ADRENOCORTICAL_TUMOR_UP	295	0.458035	1.93202	0.00031746	0.00296587	0.00166199	4536	tags=39%, list=16%, signal=33%	STC1/SLC7A11/PMAIP1/COL4A2/IL32/FGFR1/SLC2A6/GADD45A/UBE2V2/MAPRE1/GAPDH/PDE4B/EXTL2/AURKA/ZWINT/CCT6A/SNX6/RDH11/TNFAIP3/MTHFD2/TDG/CAPZA1/NOL8/POLE3/SART3/TPD52L2/TXNDC9/PLEKHB2/KIF5B/FGFR1OP/MAD1L1/YKT6/RTCA/CDK5RAP2/SNX24/FGFR4/ENO1/FBN2/HSPA13/TXN/RARS/ATP6V0B/MICA/PLA2G15/NEU1/DDA1/E2F6/STXBP1/BUB3/TMEM97/TAF9/TMEM30A/PBK/TUBA1C/TCP1/PLXNC1/GLRX2/P4HA2/DAP3/ARPC5L/HDAC1/PCYOX1L/TPX2/ANKMY2/…
IVANOVA_HEMATOPOIESIS_INTERMEDIATE_PROGENITOR	126	0.506314	1.93177	0.000264901	0.00296587	0.00166199	4451	tags=45%, list=16%, signal=38%	PAPSS2/TRMT6/GALK1/SCO1/SURF6/NOC3L/ERLIN1/ATP6AP2/SSR1/DHX37/MRPS25/SLC35B2/ISG20L2/CEBPZ/NOL9/ERCC8/TMEM97/SNUPN/RABEPK/CHCHD4/CDADC1/PFKP/CASP7/MAP3K20/PGAM1/MRPS35/AAGAB/EIF6/C7orf50/PES1/G3BP1/GFM1/WDR73/SSR2/PRAG1/BLOC1S2/LUC7L/BID/DDX20/WDR77/SDF2L1/MAPRE2/CTSZ/YDJC/MRPL12/UTP25/CISD1/ENOPH1/CHST14/RASSF4/GMPPA/C12orf10/DNLZ/TXNDC15/MDH1/SFXN4/APEX1
WANG_SMARCE1_TARGETS_DN	368	0.448417	1.93154	0.000336474	0.00296587	0.00166199	4566	tags=41%, list=16%, signal=35%	SRGN/S100A8/KYNU/LGALS3BP/SLC39A8/AKR1B1/CXCL8/SOD2/TGM2/TNFRSF6B/PLK2/FAM216A/BAMBI/SLCO4A1/BNIP3/PRSS23/ADAM12/GDF15/TCERG1/POLR3G/UBE2V2/SUSD5/CXCL1/TWIST1/FGF2/TM4SF1/AURKA/CXCL2/TACC2/PLCB4/TRIM9/OSTM1/CXCL3/DUSP4/GNG11/PSMB8/BDNF/FGF5/NOP16/GLA/MAN1A1/WFDC21P/STC2/HK2/GRPEL1/PPIF/LIF/ADAMTS1/EIF4E/IL13RA2/HLA-B/PDF/GTF2H2/ALAS1/TAP2/LAP3/AIMP1/HCCS/HDDC2/ABI3BP/IER5/IFI27/GALNT14/MICA/NOC2L…
PICCALUGA_ANGIOIMMUNOBLASTIC_LYMPHOMA_UP	187	0.481258	1.93146	0.000282247	0.00296587	0.00166199	2988	tags=30%, list=10%, signal=27%	C3/CFB/CFH/C1S/CCDC80/C1R/PAPSS2/FBN1/FERMT2/COL4A2/FN1/ACKR1/SERPINH1/EPHX1/TAGLN/ACTA2/SAMD9L/ABCC3/TNC/COL12A1/S1PR3/RGL1/GPRC5B/ADAMTS9/PGF/FSTL1/LAMB1/RGS5/WLS/COL4A1/ADAMTS1/NR1H3/CLMP/ABI3BP/IFI27/TDO2/NNMT/PDLIM5/SLAMF8/SPRED1/RAB13/SLCO2B1/ANTXR1/TLR4/OSMR/ENG/GUCY1B1/RHOBTB3/C4A/MARCKS/WWTR1/IDH1/MYL9/LAMC1/DOCK4/ZNF226
REACTOME_SCF_SKP2_MEDIATED_DEGRADATION_OF_P27_P21	60	0.571835	1.93114	0.000243309	0.00296587	0.00166199	5167	tags=60%, list=18%, signal=49%	CDKN1A/CCND1/PSMB8/PSMC5/PSME3/PSMB10/PSMA6/PSMC4/PSMB9/PSMD10/PSME2/PSMA5/PSMD7/PSMD13/PSMB5/PSMD11/PSME1/PSMA2/PSMA1/PTK6/PSMC3/CKS1B/RPS27A/PSMD2/SKP1/UBC/PSMD4/PSMC2/PSMB6/PSMA7/PSMD12/PSMD14/PSMB4/UBA52/PSMB3/PSMA3
YORDY_RECIPROCAL_REGULATION_BY_ETS1_AND_SP100_DN	62	0.567207	1.93055	0.000242954	0.00296587	0.00166199	2660	tags=37%, list=9%, signal=34%	SNAI1/CCN3/IFI6/PTPRM/CLIC2/SAMD9L/TNC/HSPA8/PCDH9/SOCS3/ZMYND8/CHORDC1/TYW3/LRIF1/ANGPTL4/TENT5C/TICAM2/BAG3/IRF9/CFD/HSPH1/AHSA1/CACYBP
JIANG_HYPOXIA_CANCER	57	0.575986	1.92827	0.000242307	0.00296587	0.00166199	5578	tags=56%, list=20%, signal=45%	COLGALT1/FERMT2/TGM2/EDN2/FN1/UFM1/ERGIC1/PGM1/PLOD3/PRMT5/TIMM21/ISG15/PPT1/MRTO4/SUCLG2/HAX1/BET1L/YIPF5/ATP6V1A/ITGAE/SLC12A1/SRSF9/ATP1B1/SERP1/SLA/MRPS34/ARPC5/UBL7/VAPB/PGM3/COA3/EBPL
SANA_RESPONSE_TO_IFNG_DN	85	0.535297	1.92791	0.000505945	0.00377703	0.00211654	5263	tags=58%, list=18%, signal=47%	TNFRSF10D/PON2/TFRC/NQO1/FGFR1/PRSS23/GADD45A/TIMM17A/ESM1/FABP5/CCNB1IP1/PRDX1/HSPD1/CCT5/TXNDC5/APLN/PRMT1/COTL1/CCT4/PRKAG2/ARHGDIB/TPX2/ANTXR1/HHIP/CCT3/PA2G4/UTP4/HMGCL/SMS/ODC1/RHOC/HSP90AB1/SMYD2/THSD4/KRT7/SSR2/RTN4/H2AFZ/RAN/RGS4/ATP5PB/POLD2/APEX1/DAB2/RPS3A/UQCR10/SLC25A3/ADPRM/NDUFA4
REACTOME_RNA_POLYMERASE_II_TRANSCRIPTION_TERMINATION	65	0.561471	1.9266	0.000246002	0.00296587	0.00166199	5137	tags=45%, list=18%, signal=37%	SRSF7/SRRM1/NCBP2/CSTF2/CLP1/SRSF3/FIP1L1/THOC2/CHTOP/THOC1/LSM10/RBM8A/MAGOHB/SYMPK/UPF3B/SNRPE/U2AF1L4/ALYREF/SRSF2/U2AF2/DDX39A/EIF4A3/SRSF9/SARNP/SRSF11/SRSF6/CSTF1/SNRPF/DHX38
COLINA_TARGETS_OF_4EBP1_AND_4EBP2	333	0.450262	1.92335	0.000324359	0.00296587	0.00166199	4401	tags=36%, list=15%, signal=31%	C3/PLOD2/C1S/NPR3/IFI44/MME/LGALS3BP/C1R/NSG1/TGM2/PON2/WNT5A/PAM/SVEP1/CD59/ENO2/CCND1/GPX3/PAX8/RNF128/PNP/IFITM3/SRPX/TM4SF1/GRWD1/SLC16A3/IFIT2/NR2F1/IFI35/F3/KHDRBS3/CRYZ/B2M/GNG11/PSMB8/TOR1AIP1/GLA/STC2/CDC20/VAMP3/GBP3/ADAMTS1/RSPO2/PGM1/MGST1/APTX/PWP2/BICC1/CCN5/SMPDL3B/PHLDA1/TACC3/ACSL5/TOR3A/STAT1/TMEM97/RECK/NNMT/PRMT5/NUDT5/HELLS/IRF9/PBK/ISG15/RFK/PON3/ZNF35/GRN/SIGMAR1/PHPT1/PSMB…
BLUM_RESPONSE_TO_SALIRASIB_UP	242	0.464165	1.9179	0.000304136	0.00296587	0.00166199	4645	tags=40%, list=16%, signal=33%	VIM/CDKN1A/SQSTM1/IFRD1/PSAT1/QSOX1/GADD45A/SEZ6L2/ZPR1/ARF4/MAFG/SSR3/TBCE/ATF3/GOSR2/ATF5/CBS/CASP4/CXCL3/TNFAIP3/DDX10/MTHFD2/COPG1/STC2/DNAJB9/ERCC1/ARHGEF2/RELB/CALU/TIMM44/FOSL1/TBL1X/TNFRSF10B/CCNB1IP1/YKT6/RTCA/BCL2L1/DNAJA3/P4HB/PTX3/HSPA13/ESRRA/SCFD1/AARS/ECH1/SERPINB8/CREB3/MGAT1/PEA15/PFDN2/TOM1/DAP3/COX7A2L/TARS/LIPT1/SPHK1/ZYX/RRN3/EIF5/TRIB3/RNF7/NAMPT/NARS/PPIE/AVEN/SKIV2L/MAP1LC…
GROSS_HYPOXIA_VIA_ELK3_DN	147	0.492654	1.91775	0.000271076	0.00296587	0.00166199	1662	tags=24%, list=6%, signal=23%	C3/SRGN/S100A8/GBE1/TNFRSF10D/SLC7A11/PLK2/IFRD1/ANPEP/VLDLR/NFIL3/SAMSN1/GADD45A/SAT1/TNC/CSF3/TM4SF1/VEGFA/XBP1/FOS/PTGS2/DUSP4/MTHFD2/ACSL4/ZNF330/RIOK1/SLC39A14/DUSP2/PFKFB3/ENO1/RARS/SMOX/PDLIM5/TXNL1/NOCT
REACTOME_RNA_POLYMERASE_II_PRE_TRANSCRIPTION_EVENTS	79	0.539752	1.91733	0.000252908	0.00296587	0.00166199	5599	tags=49%, list=20%, signal=40%	TAF13/TAF7/ELOA/CCNH/NCBP2/IWS1/CDC73/TAF12/GTF2H2/ERCC2/SUPT5H/TAF9/GTF2E2/GTF2A2/TAF3/ELOC/CTR9/TAF11/MLLT3/POLR2G/POLR2K/POLR2C/EAF1/PAF1/WDR61/POLR2L/SUPT16H/POLR2I/POLR2D/POLR2H/POLR2F/GTF2H5/GTF2B/POLR2B/GTF2H1/POLR2E/ELOB/EAF2/NELFE
REACTOME_DISEASES_OF_GLYCOSYLATION	134	0.496967	1.91715	0.000265252	0.00296587	0.00166199	3615	tags=35%, list=13%, signal=31%	DCN/SDC3/ADAMTS12/PAPSS2/GPC6/CSPG5/MUC1/HEXA/SLC26A2/GALK1/ALG1/MGAT2/ST3GAL3/ADAMTS9/CTSA/SDC2/GPC1/NUS1/ADAMTS1/PGM1/ADAMTSL4/ALG2/OMD/GNE/B3GAT3/BGN/NEU1/SRD5A3/SSPO/C1GALT1/B4GALT7/ADAMTS3/DHDDS/HEXB/ADAMTS4/BCAN/AGRN/MPI/THSD4/ALG12/GALE/GPC2/ADAMTS13/ADAMTS15/MPDU1/RFT1/MUC13
REACTOME_TNFR2_NON_CANONICAL_NF_KB_PATHWAY	94	0.523805	1.91699	0.000257202	0.00296587	0.00166199	5167	tags=52%, list=18%, signal=43%	TNFSF9/BIRC3/TNFRSF6B/TNFSF14/PSMB8/PSMC5/PSME3/NFKB2/RELB/TNFRSF9/EDA2R/PSMB10/TNFRSF1A/PSMA6/PSMC4/TNFSF4/PSMB9/PSMD10/TNFRSF11B/PSME2/PSMA5/PSMD7/PSMD13/PSMB5/PSMD11/MAP3K14/TNFRSF12A/PSME1/TNFRSF25/PSMA2/PSMA1/PSMC3/UBE2M/TRAF2/RPS27A/PSMD2/SKP1/UBC/PSMD4/PSMC2/PSMB6/PSMA7/LTB/PSMD12/PSMD14/PSMB4/UBA52/PSMB3/PSMA3
PUIFFE_INVASION_INHIBITED_BY_ASCITES_UP	76	0.541774	1.91415	0.00025025	0.00296587	0.00166199	2140	tags=29%, list=8%, signal=27%	ABCC2/AKR1C1/AKR1C3/ALOX5AP/AKR1B10/STIP1/SRRM1/F3/G6PD/PLIN3/GCLM/PGK1/GATC/KPNA2/CCT2/BCL2L1/TYMS/ENO1/SAP30/IGFBP4/TPX2/OSMR
JAIN_NFKB_SIGNALING	72	0.547252	1.91384	0.000248633	0.00296587	0.00166199	5533	tags=51%, list=19%, signal=42%	BNIP3/LIG4/VEGFA/DECR1/PLAU/HK2/TPD52L2/RIDA/TAP2/HDDC2/TRMT1/NOC2L/PSPH/PRR3/DCTN1/ITPA/TICAM1/LAS1L/SPHK2/SYMPK/PREPL/PSMA2/CLUH/RCC1/PEX14/ARSB/ALG3/BCAT2/CBX3/STK4/METAP1/APRT/DDX46/PMVK/NAP1L1/MPHOSPH9/ARMC6
REACTOME_COOPERATION_OF_PREFOLDIN_AND_TRIC_CCT_IN_ACTIN_AND_TUBULIN_FOLDING	32	0.641708	1.91316	0.000912825	0.00580716	0.00325417	4552	tags=66%, list=16%, signal=55%	TUBAL3/CCT6A/CCT2/CCT5/TUBA1C/TCP1/PFDN2/CCT4/CCT3/VBP1/CCT8/CCT7/PFDN5/TUBB3/TUBB4B/TUBB2A/ACTB/TUBA8/TUBB6/PFDN6/TUBB2B
REACTOME_INTERCONVERSION_OF_NUCLEOTIDE_DI_AND_TRIPHOSPHATES	29	0.653822	1.91276	0.0013587	0.0079128	0.00443411	3378	tags=45%, list=12%, signal=40%	GSR/GLRX/TXNRD1/AK6/TYMS/GUK1/TXN/RRM2B/CTPS1/AK2/NME1/NME3/NME4
CHARAFE_BREAST_CANCER_LUMINAL_VS_MESENCHYMAL_DN	461	0.434943	1.91058	0.000362319	0.0030046	0.00168369	3744	tags=36%, list=13%, signal=32%	VIM/SRGN/C1S/SERPINE2/PROS1/ZEB1/SYDE1/IL7R/AKR1B1/ADGRE5/ADAMTS12/AKR1C3/LHFPL6/PDE7B/DPYD/TNFRSF10D/HAS2/FBN1/PAPPA/MFGE8/TIMP2/CHST2/TGFBI/COL4A2/F2RL2/CNRIP1/PTPRM/GADD45A/P3H1/MAP1B/LIX1L/IKBIP/ACTA2/BAG2/MAPRE1/PDGFC/ASB1/FBLIM1/SDCBP/GFPT2/PFAS/RUNX2/SRPX/TOX2/EXTL2/GPRC5B/CCDC88A/CXCL2/DENND5A/NR2F1-AS1/STX2/NR2F1/PLAU/DNAJB4/BIN1/FSTL1/LAMB1/ZCCHC24/TNFAIP3/SOCS3/PTGS2/GNG11/BDNF/GPX8/RB…
ZHENG_IL22_SIGNALING_UP	50	0.587148	1.91021	0.000478583	0.00372637	0.00208815	1162	tags=22%, list=4%, signal=21%	C3/CFB/RTN1/S100A8/S100A9/SAA1/LRG1/MFSD2A/TMEM173/PFKFB3/PTX3
RODWELL_AGING_KIDNEY_UP	446	0.434835	1.90631	0.000355745	0.00298207	0.00167107	4561	tags=38%, list=16%, signal=32%	CFB/RTN1/VIM/SRGN/C1S/SERPINE2/NRXN3/C1R/LAPTM5/GGT5/ADGRE5/ZEB2/BIRC3/FBN1/MFGE8/TIMP2/HCLS1/CCN3/TGFBI/IL32/COL27A1/PAM/FN1/IKBIP/SVEP1/TAGLN/SAMD9L/MYRF/CXorf38/TBXAS1/TNC/CXCL1/MVP/RUNX2/HTATIP2/CCDC88A/DOK1/ADGRE2/SEL1L3/TRIM22/VARS/NR2F1/TOR4A/CHPF2/RPS27L/ZCCHC24/SOCS3/FHOD1/PSMB8/GPX8/RBMS3/NUS1/PPP1R18/CASP1/AATF/C1orf216/STK10/TMEM173/EMP3/DEGS1/HLA-B/CALU/CMTM3/CARD8-AS1/NLRC5/P4HB/RAB…
ELVIDGE_HYPOXIA_BY_DMOG_UP	132	0.494526	1.90163	0.000265041	0.00296587	0.00166199	2254	tags=39%, list=8%, signal=36%	IGFBP3/CA9/LOX/STC1/ALDOC/GBE1/ASPH/TGFBI/SLCO4A1/VLDLR/SCNN1B/P4HA1/BNIP3/GLRX/EGLN3/NFIL3/QSOX1/GDF15/PAM/SPAG4/S100A4/LIMCH1/SAT1/CD59/ENO2/BNIP3L/SRPX/ATF3/VEGFA/FOS/ITPR1/STC2/ANGPTL4/HK2/PGK1/PGM1/LOXL2/TMEM45A/PDK1/PLAUR/CCN5/PFKFB3/FAM162A/JUN/SRD5A3/S100A6/ADORA2B/P4HA2/DDIT4/PFKP/CYB5A
REACTOME_METABOLISM_OF_CARBOHYDRATES	274	0.454368	1.90128	0.000309981	0.00296587	0.00166199	3102	tags=27%, list=11%, signal=24%	DCN/CHSY3/UGP2/SDC3/AKR1B1/ALDOC/PAPSS2/GBE1/HAS2/CHST2/GPC6/HS3ST3B1/CSPG5/DSEL/PGD/HEXA/GALNS/SLC26A2/ENO2/GALK1/GAPDH/ST3GAL3/ST3GAL2/GNPDA1/CHPF2/G6PD/SDC2/GPC1/HS3ST3A1/HK2/PGK1/SLC35B2/PGM1/SORD/OMD/ADPGK/PFKFB3/B3GAT3/ENO1/PKM/SEH1L/BGN/CHST1/PRPS1/HYAL2/HK1/ALDOA/B4GALT7/RPIA/HS6ST2/PPP2CB/NUP54/B3GNT2/TALDO1/SLC35B3/FUT11/HEXB/HS3ST2/NUP62/SLC25A1/PFKP/B4GALT6/PHKG2/BPGM/PGAM1/TPI1/XYLT2…
REACTOME_CYTOSOLIC_SENSORS_OF_PATHOGEN_ASSOCIATED_DNA	60	0.56261	1.89999	0.000486618	0.00375076	0.00210182	6769	tags=68%, list=24%, signal=52%	DDX41/POLR3G/IKBKG/POLR3GL/DHX36/CGAS/NKIRAS1/CRCP/TMEM173/NFKB2/POLR1C/POLR3K/POLR3H/TICAM1/TRIM21/RIPK1/POLR3A/POLR3F/POLR2K/IRF3/POLR2L/IFI16/RPS27A/POLR3D/TREX1/XRCC5/UBC/POLR2H/POLR2F/STAT6/PRKDC/POLR2E/UBA52/MYD88/POLR3B/XRCC6/NFKBIB/CHUK/RELA/DHX9/NFKBIA
REACTOME_NEGATIVE_EPIGENETIC_REGULATION_OF_RRNA_EXPRESSION	100	0.514875	1.89996	0.000258131	0.00296587	0.00166199	4415	tags=40%, list=16%, signal=34%	HIST1H2AC/POLR1E/HIST1H2BK/HIST2H2AA4/HIST1H3G/HIST1H2BG/TWISTNB/CCNH/TAF1A/HIST1H2BD/HIST2H4A/GTF2H2/CD3EAP/ERCC2/SAP30/POLR1C/UBTF/HDAC1/HIST1H2BN/HIST2H2BE/TAF1D/HIST1H3H/H2AFX/POLR2K/TAF1B/ZNRD1/TTF1/POLR1B/HIST1H2BJ/SAP18/H2AFZ/POLR2L/RRP8/SAP30BP/SUV39H1/POLR2H/HIST1H2BC/SMARCA5/POLR2F/GTF2H5
WOOD_EBV_EBNA1_TARGETS_UP	110	0.506829	1.89923	0.000259	0.00296587	0.00166199	1941	tags=30%, list=7%, signal=28%	C3/C1S/TRIM16/AKR1C1/LGALS3BP/AKR1C2/AKR1C3/UGDH/SLCO4A1/NQO1/CHN1/PGD/TXNRD1/ICAM1/SERPINH1/EPHX1/S100A4/ANXA6/SRRM1/CHERP/GCLM/SORD/ASS1/FBN2/BAG3/STAT1/HSPD1/CALM3/HSPA1A/PODXL/HIRA/PNMA1/APOBEC3B
VANTVEER_BREAST_CANCER_BRCA1_UP	38	0.611816	1.8953	0.000461361	0.00368607	0.00206557	3758	tags=47%, list=13%, signal=41%	DNTTIP2/ZPR1/RRP1/TRIP6/PIM2/PUM3/RTCA/GLIPR2/SERBP1/WDR43/OGG1/GLMN/UCHL5/SLC30A7/EEF1D/REXO2/ATAD3A/THEMIS2
BENNETT_SYSTEMIC_LUPUS_ERYTHEMATOSUS	25	0.672617	1.89496	0.002	0.0105155	0.00589257	1941	tags=44%, list=7%, signal=41%	S100A8/IFI44L/LGALS3BP/IFIT3/IFITM3/IFI35/CKAP4/STAT1/OASL/ISG15/APOBEC3B
REACTOME_MITOCHONDRIAL_BIOGENESIS	93	0.517824	1.89437	0.000510465	0.00377836	0.00211729	4267	tags=43%, list=15%, signal=37%	SOD2/PPRC1/SAMM50/DNAJC11/POLG2/TWNK/ALAS1/TBL1X/NR1D1/CHCHD3/ESRRA/GABPB1/CYCS/ATP5PD/MAPK12/ATP5F1B/PRKAG2/ATP5F1E/MTX2/ATP5MC2/TFB2M/POLRMT/ATP5MC1/TGS1/TFAM/HELZ2/SSBP1/MTX1/PRKAB1/MTERF1/MICOS10/ATP5PO/TMEM11/PPARGC1B/ATP5F1D/DMAC2L/ATP5PB/ATP5F1C/IMMT/ATP5MC3
REACTOME_THE_CITRIC_ACID_TCA_CYCLE_AND_RESPIRATORY_ELECTRON_TRANSPORT	172	0.476299	1.89425	0.000280741	0.00296587	0.00166199	7244	tags=57%, list=25%, signal=43%	ME1/SCO1/SLC16A3/COQ10B/PDK1/COX20/NDUFAF4/TMEM126B/CYCS/ATP5PD/LDHA/OGDH/ATP5F1B/IDH3B/COX7A2L/SUCLG2/ACAD9/NDUFB5/ATP5F1E/ATP5MC2/VDAC1/CYC1/NDUFA8/ACO2/ATP5MC1/TACO1/PDHA1/DLST/UQCR11/NDUFA12/GSTZ1/NDUFA9/ETFB/NDUFV3/NDUFA6/IDH3G/SUCLA2/COX16/ATP5PO/NDUFA13/SDHA/TIMMDC1/PDK3/ATP5F1D/DMAC2L/ATP5PB/NDUFB2/NDUFS3/NDUFA10/SLC16A1/PDHB/ATP5F1C/NDUFB9/ATP5MC3/NDUFAF1/NDUFAF2/NDUFB3/NDUFB1/UQCRQ/NDUF…
REACTOME_RNA_POLYMERASE_II_TRANSCRIPTION_ELONGATION	57	0.565607	1.89352	0.000484614	0.00375076	0.00210182	5599	tags=53%, list=20%, signal=42%	ELOA/CCNH/NCBP2/IWS1/CDC73/GTF2H2/ERCC2/SUPT5H/ELOC/CTR9/MLLT3/POLR2G/POLR2K/POLR2C/EAF1/PAF1/WDR61/POLR2L/SUPT16H/POLR2I/POLR2D/POLR2H/POLR2F/GTF2H5/POLR2B/GTF2H1/POLR2E/ELOB/EAF2/NELFE
SCHAEFFER_PROSTATE_DEVELOPMENT_12HR_DN	40	0.60585	1.89348	0.000463177	0.00369094	0.0020683	3317	tags=38%, list=12%, signal=33%	COL8A1/TGFBI/ST3GAL2/ENC1/RASA3/ZWINT/AMPH/KPNA2/IGFBP4/PRMT1/BASP1/MTCH1/PLAT/CHD3/HIC1
MENSE_HYPOXIA_UP	97	0.514684	1.89175	0.000256213	0.00296587	0.00166199	2848	tags=36%, list=10%, signal=33%	PLOD2/LOX/ALDOC/GBE1/ASPH/SOD2/P4HA1/BNIP3/NFIL3/GADD45A/SPAG4/INSIG1/ENO2/BNIP3L/ATF3/VEGFA/GOSR2/JMJD6/STC2/ANGPTL4/HK2/PGK1/PDK1/PFKFB3/C4orf3/FAM162A/P4HA2/FUT11/OSMR/AC074143.1/NAMPT/CTTN/PPFIA4/THAP8/ERO1A
ZHU_CMV_8_HR_UP	41	0.602418	1.89166	0.0004662	0.00369579	0.00207101	2416	tags=41%, list=8%, signal=38%	IFI6/GBP1/DNAJA1/PML/ATF5/TNFAIP3/PTGS2/PSMB8/SP100/SLC39A14/ALAS1/NR4A1/ISG15/IFITM1/TRIM21/RIPK1/NAMPT
BOYAULT_LIVER_CANCER_SUBCLASS_G1_DN	39	0.60812	1.89163	0.000692841	0.00474294	0.00265781	4165	tags=56%, list=15%, signal=48%	SLC39A8/GBE1/GLRX/GADD45A/ZNF330/GCLM/GCHFR/VKORC1/BTN3A2/LAP3/CTSB/TMED5/CYP4F11/GCLC/ACYP2/AK2/BTN3A3/COQ9/ZNF593/KAT2B/HSD17B10/SLC16A1
REACTOME_FORMATION_OF_FIBRIN_CLOT_CLOTTING_CASCADE	33	0.628395	1.89126	0.00114811	0.00691802	0.00387666	3028	tags=30%, list=11%, signal=27%	SERPINE2/PROS1/SERPINA5/F3/F2R/PROCR/THBD/TFPI/PF4V1/F8
WALLACE_PROSTATE_CANCER_RACE_UP	246	0.456481	1.88992	0.000304229	0.00296587	0.00166199	2201	tags=26%, list=8%, signal=24%	SRGN/CDH2/IFI44L/IFI44/MMP19/LAPTM5/IL7R/ADGRE5/ALOX5AP/FBN1/IFIT3/HCLS1/ANPEP/GLRX/IFI6/APOL1/NFIL3/GBP1/SAMSN1/IFIT1/PLEKHO2/CLIC2/CCND1/UBE2L6/LSP1/IFITM2/IFITM3/CD83/GPRC5B/CMAHP/DLC1/GNG11/PSMB8/HS3ST3A1/ADAMTS1/IL1R2/PIM2/BTN3A2/NCKAP1L/HLA-B/NLRP1/DUSP2/TAP2/IFI27/FBN2/SOCS1/STAT1/PSPH/APOL6/EVI2B/TYMP/IRF9/SEPT6/ISG15/IFITM1/COTL1/JCAD/PSMB9/MXRA7/CREM/THBD/SECTM1/ARHGAP25
AMIT_EGF_RESPONSE_60_MCF10A	39	0.607332	1.88918	0.000692841	0.00474294	0.00265781	2908	tags=46%, list=10%, signal=41%	CXCL8/PLK2/ZC3H12A/GADD45A/ID1/CXCL2/DLC1/TNFAIP3/PTGS2/DAPP1/IER2/JUN/IER3/PDLIM5/MGMT/PTGER4/CCN2/MAP3K14
KEGG_PYRIMIDINE_METABOLISM	96	0.514179	1.88687	0.000255885	0.00296587	0.00166199	5046	tags=47%, list=18%, signal=39%	DPYD/TXNRD1/POLR3G/POLR1E/PNP/POLR3GL/UMPS/POLE3/TYMS/RRM2B/POLR1C/TYMP/POLR3K/DHODH/ITPA/POLR3H/CTPS1/NME1-NME2/NT5C3A/PNPT1/POLR3A/NME1/POLR3F/NME3/POLR2G/POLR2K/ZNRD1/POLR2C/NME7/POLR1B/NME4/POLE4/POLR2L/POLR2I/POLR3D/POLR2D/POLD2/POLR2H/POLR2F/DTYMK/NUDT2/POLD1/POLR2B/TK2/POLR2E
REACTOME_INTERLEUKIN_10_SIGNALING	35	0.619517	1.88587	0.00137489	0.00798321	0.00447356	1505	tags=43%, list=5%, signal=41%	CXCL8/IL1A/IL1R1/IL1B/ICAM1/CSF3/CXCL1/FPR1/CXCL2/CCL20/PTGS2/LIF/IL1R2/TNFRSF1A/CSF1
PUIFFE_INVASION_INHIBITED_BY_ASCITES_DN	145	0.485475	1.88489	0.000272257	0.00296587	0.00166199	5409	tags=46%, list=19%, signal=37%	CXCL8/ASPH/UBE2V2/SAT1/PDGFC/RGL1/CCL20/LDLR/NOC3L/TP53I3/PTGS2/CCNH/TMEM100/ZNF330/AMD1/ZNHIT6/ESF1/TXNDC9/CEBPZ/NOL11/ATG12/AK6/RBM34/AIMP1/ELOVL5/DUSP1/DCTN6/IRF9/ECHDC1/PNN/RAP2C/PCYT2/RABGGTB/SELENOP/C6orf120/NRBF2/TAF1D/THOC1/MOSPD1/WWTR1/TGFBR3/BCAS2/ZNF226/MFF/BTBD1/SHLD2/CDK1/TCEAL4/EXOSC8/EPB41L2/RGS4/LAMTOR3/PPIC/UGCG/TEX30/FNDC3B/TRAK2/CGRRF1/WDR13/APRT/ZCCHC10/MTIF2/DNAJC24/UQCRB/NAP…
HORIUCHI_WTAP_TARGETS_UP	294	0.446618	1.88344	0.000316957	0.00296587	0.00166199	2704	tags=28%, list=9%, signal=26%	CFB/CFH/HMOX1/SERPINE2/TRIM16/RIT1/IFI44/LGALS3BP/IL7R/MAFB/SOD2/ZEB2/BIRC3/CFI/FBN1/PAPPA/IFIT3/HIST1H2AC/CHST2/BAMBI/IFRD1/FBXO22/VLDLR/IL1R1/APOL1/NFIL3/COL27A1/PTPRM/HEXA/ICAM1/TAGLN/ACTA2/LIMCH1/CXCL1/SAR1A/HTATIP2/ATF3/CXCL2/IFIT2/COA7/CYB5R1/OSTM1/GCNT2/SIPA1L2/CXCL3/TNFAIP3/DUSP4/ITPR1/CASP1/LRIF1/STC2/HIST1H2BD/NUDT16/COL4A1/TMEM45A/TRIB2/PRNP/ACSL5/NR1D1/ZNF503/SMOX/LINC00869/CSF1/RECK/…
REACTOME_DISEASES_ASSOCIATED_WITH_GLYCOSAMINOGLYCAN_METABOLISM	39	0.605458	1.88335	0.000692841	0.00474294	0.00265781	3235	tags=46%, list=11%, signal=41%	DCN/SDC3/PAPSS2/GPC6/CSPG5/HEXA/SLC26A2/ST3GAL3/SDC2/GPC1/OMD/B3GAT3/BGN/B4GALT7/HEXB/BCAN/AGRN/GPC2
SCHRAETS_MLL_TARGETS_UP	27	0.652704	1.88192	0.00201658	0.0105845	0.00593123	3764	tags=41%, list=13%, signal=35%	DCN/SERPINE2/ACTA2/TNC/FOS/TOB1/TSPAN7/FAS/CAVIN2/CTSZ/MLF1
ALCALA_APOPTOSIS	83	0.525049	1.88184	0.000506073	0.00377703	0.00211654	4070	tags=47%, list=14%, signal=40%	RIT1/IL32/SAMSN1/TIMM17A/HSPA8/GAPDH/BNIP3L/AURKA/CASP4/BAX/CASP1/CEBPZ/MTO1/ARL6IP5/HCCS/TOMM20/HLA-A/CCT5/TMEM35B/CHMP7/ATP5F1B/FUS/TALDO1/PFKP/VDAC1/PSTPIP1/MTCH1/FAS/CD7/SCAMP3/GNAS/SYMPK/MFF/FAM104A/ANXA7/DENND1A/AP5Z1/MTCH2/STX4
RADAEVA_RESPONSE_TO_IFNA1_UP	46	0.587479	1.88177	0.000237756	0.00296587	0.00166199	4418	tags=52%, list=16%, signal=44%	IFI44L/IFI44/LGALS3BP/IFI6/UBE2L6/IFITM2/IFITM3/IFI35/BAX/CYB561D2/PRKCQ/IFI27/SOCS1/STAT1/ISG15/IFITM1/BST2/PHB/PSME1/HLA-C/RRP8/TUBB/CALR/IRF1
SHAFFER_IRF4_TARGETS_IN_ACTIVATED_B_LYMPHOCYTE	79	0.529705	1.88164	0.000505817	0.00377703	0.00211654	3332	tags=38%, list=12%, signal=34%	ADGRE5/ALDOC/TIMP2/PAM/INSIG1/PNP/AURKA/UAP1/VEGFA/SLAMF7/LDLR/GNPDA1/FADS1/HK2/PGK1/BMP6/CYCS/LDHA/LONP1/HMBS/VDAC1/MSMO1/PAICS/IDH1/SLC31A1/TNFRSF12A/GARS/EIF2S2/PRPF40A/KTN1
YAO_TEMPORAL_RESPONSE_TO_PROGESTERONE_CLUSTER_7	68	0.5433	1.88026	0.000738916	0.0050024	0.0028032	4469	tags=43%, list=16%, signal=36%	SOD2/FAM136A/SNAI1/BRIX1/MGAT2/CHERP/EIF2S1/TM2D2/KIF5B/NCDN/DDA1/HSPA4/EIF3J/CDV3/EIF4A1/SAR1B/MIDN/MTERF3/PSMA2/PPP1R15B/MRPL17/INTS5/SERTAD1/ETF1/EMC8/PPM1G/ZNF281/ANP32B/BCAT2
KEGG_HEMATOPOIETIC_CELL_LINEAGE	66	0.545769	1.8787	0.000491763	0.00375711	0.00210538	1505	tags=20%, list=5%, signal=19%	ITGA5/MME/IL7R/IL1A/ANPEP/TFRC/IL1R1/IL1B/CD59/CSF3/IL1R2/ITGB3/CSF1
SESTO_RESPONSE_TO_UV_C0	106	0.504072	1.87755	0.000259067	0.00296587	0.00166199	2361	tags=42%, list=8%, signal=39%	HMOX1/RIT1/SAA1/SQSTM1/BAMBI/DNTTIP2/TFRC/QSOX1/GDF15/DNAJA1/TAF7/UBE2V2/CXCL1/PNP/PGRMC1/EIF2S1/NCBP2/PPIF/IL1R2/KPNA2/TPMT/PRNP/HCCS/CLP1/NEU1/SON/CDC37/CNBP/HARS/DYNLL1/TAF9/HSPA1A/TCP1/HSPH1/MCFD2/CLTA/PPP2CB/GTF2A2/ARL6IP1/RBM4/EIF5/ELOC/CTR9/EIF2B1/PTP4A1
REACTOME_G1_S_DNA_DAMAGE_CHECKPOINTS	66	0.544925	1.87579	0.000491763	0.00375711	0.00210538	5167	tags=53%, list=18%, signal=44%	CDKN1A/MDM2/PSMB8/PSMC5/PSME3/PSMB10/PSMA6/PSMC4/PSMB9/PSMD10/PSME2/PSMA5/PSMD7/PSMD13/PSMB5/PHF20/PSMD11/PSME1/PSMA2/PSMA1/PSMC3/CHEK2/RPS27A/PSMD2/UBC/PSMD4/PSMC2/PSMB6/PSMA7/PSMD12/PSMD14/PSMB4/UBA52/PSMB3/PSMA3
RUTELLA_RESPONSE_TO_HGF_UP	400	0.431749	1.87301	0.000340948	0.00296587	0.00166199	3387	tags=30%, list=12%, signal=27%	C3/TNIP3/C1S/KYNU/AKR1C1/SQSTM1/AKR1B1/SOD2/BIRC3/SLC7A11/TIMP2/TGM2/IL1A/GSR/TFRC/IL1R1/HSD11B1/NQO1/IL1B/IFI6/C3AR1/FTH1/ADAM12/PVR/ME1/TNFAIP6/CLIC2/CES1/CYP27B1/CD59/ABCC3/CCND1/SNTB1/CXCL1/MT1F/RGL1/METTL1/SLAMF7/LDLR/ACO1/SEC22B/ELOA/CHPF2/CRYZ/RDH11/EIF2S1/CXCL3/FADS1/SDC2/ITPR1/GCLM/VNN1/GLA/NRP1/SP140L/ZNF274/HK2/PPIF/ANOS1/IL1R2/NR1H3/ALAS1/TPST1/PRDX1/MGLL/ARL6IP5/STK17A/CTSB/EMC7/TXN/…
SEITZ_NEOPLASTIC_TRANSFORMATION_BY_8P_DELETION_DN	32	0.627912	1.87203	0.000912825	0.00580716	0.00325417	3182	tags=53%, list=11%, signal=47%	COL8A1/CDKN1A/SAA1/IL1A/INSIG1/LIMCH1/CSF3/FKBP11/PSPH/QPCT/DDIT4/FKBP9/TGFA/PHF20/PXDN/CDH4/PHF1
REACTOME_COMPLEX_I_BIOGENESIS	55	0.5629	1.8706	0.000721501	0.00489533	0.0027432	7346	tags=67%, list=26%, signal=50%	NDUFAF4/TMEM126B/ACAD9/NDUFB5/NDUFA8/NDUFA12/NDUFA9/NDUFV3/NDUFA6/NDUFA13/TIMMDC1/NDUFB2/NDUFS3/NDUFA10/NDUFB9/NDUFAF1/NDUFAF2/NDUFB3/NDUFB1/NDUFC2/NDUFA3/NDUFAF3/NDUFS2/NDUFB8/NDUFS6/NDUFA11/NDUFS5/NDUFV1/NDUFAB1/NDUFS4/ECSIT/NDUFB11/NDUFB6/NDUFS7/NDUFA2/NDUFAF5/NDUFAF7
MILI_PSEUDOPODIA_CHEMOTAXIS_UP	80	0.525366	1.8695	0.00025355	0.00296587	0.00166199	4734	tags=42%, list=17%, signal=36%	ZEB1/ZEB2/MAP1B/LZTS3/ATF5/EIF3A/C1orf216/KIF5B/SH3BGRL/COX20/DKC1/UPF3A/RAB13/SEPT7/PKN1/GLTP/RFLNB/PALLD/CENPB/EIF2S2/ANKRD11/MFF/MATR3/PGGT1B/SSB/RASSF3/EIF3E/COA5/HMGN5/ANP32B/HSPB11/GXYLT1/TRAK2/KIF1C
WANG_ESOPHAGUS_CANCER_VS_NORMAL_UP	112	0.497627	1.86937	0.000259202	0.00296587	0.00166199	3244	tags=40%, list=11%, signal=36%	IGFBP3/SRGN/C1S/C1R/LAPTM5/ADGRE5/SMTN/FN1/TBXAS1/DAP/LZTS3/IFITM3/ATF3/GPRC5B/ENC1/TNFAIP3/SOCS3/P3H4/GBP3/PIM2/CALU/DUSP2/TRIB2/ECE1/FOSB/HLA-A/JUN/AQP9/NR4A1/IFITM1/CREB3/IFI30/C4A/ANXA5/PIGT/GSTO1/BTN3A3/ODC1/BAK1/FKBP6/TNFRSF12A/IRF3/ZNF593/SSR2/ARID5A
HELLEBREKERS_SILENCED_DURING_TUMOR_ANGIOGENESIS	72	0.534489	1.86921	0.000497265	0.00375711	0.00210538	1754	tags=39%, list=6%, signal=37%	IGFBP3/CDH2/SERPINE2/CDKN1A/CXCL8/FBN1/COL4A2/IL32/F2RL2/SMTN/IFI6/FTH1/QSOX1/GADD45A/ICAM1/TAGLN/CXCL1/TNFAIP3/BDNF/RELB/TMEM45A/ABI3BP/ASS1/CTSB/IFI27/MEFV/IER3/CUX1
HUANG_FOXA2_TARGETS_DN	38	0.603308	1.86894	0.000922722	0.00585794	0.00328263	1253	tags=39%, list=4%, signal=38%	PROS1/CDKN1A/CFI/TGM2/TGFBI/S100A4/TNC/SRPX/CLIC3/CXCL2/GALNT6/LOXL2/PLAUR/GAS2L1/CTSB
MOOTHA_MITOCHONDRIA	441	0.426411	1.86715	0.000353232	0.00297766	0.0016686	5681	tags=49%, list=20%, signal=40%	SOD2/SLC25A32/SLC25A22/CYP27B1/TIMM17A/CASP8/BNIP3L/MRPL42/MRPS30/TIMM10B/DECR1/TIMM22/FARSA/G6PD/BAX/MTHFD2/SLC25A20/CYBA/POLG2/TWNK/TIMM8A/CBARP/TOMM34/VDAC2/TIMM44/ALAS1/PDK1/SPG7/BCL2L1/PYCR1/MTO1/HCCS/SLC25A15/TOMM20/PRPF6/PAM16/NFS1/HSPD1/CYCS/ATP5PD/DCTN6/MRPS18C/LONP1/DIABLO/TYMP/MRPS10/MRPL35/PLA2G2A/ATP5F1B/HK1/GNLY/DHODH/CPOX/IDH3B/SLC25A4/DAP3/GCFC2/SNCA/HAX1/NDUFB5/ATP5F1E/SLC25A17/M…
REACTOME_DEGRADATION_OF_AXIN	53	0.565875	1.8656	0.00167544	0.00920441	0.00515789	7048	tags=70%, list=25%, signal=53%	PSMB8/PSMC5/PSME3/PSMB10/PSMA6/PSMC4/PSMB9/PSMD10/PSME2/PSMA5/PSMD7/PSMD13/PSMB5/PSMD11/PSME1/PSMA2/PSMA1/PSMC3/RPS27A/PSMD2/UBC/PSMD4/PSMC2/PSMB6/PSMA7/PSMD12/PSMD14/PSMB4/UBA52/PSMB3/PSMA3/PSMC6/PSMB7/PSMB1/PSMB2/PSMD1/SEM1
GARGALOVIC_RESPONSE_TO_OXIDIZED_PHOSPHOLIPIDS_GREEN_UP	26	0.654278	1.86412	0.00268396	0.0129472	0.00725524	4393	tags=50%, list=15%, signal=42%	AKR1B10/LDLR/STIP1/SOCS3/GEM/CPNE8/GNE/TNFRSF10A/CREM/IDI1/HDAC9/TMEM171/ETV5
LIANG_HEMATOPOIESIS_STEM_CELL_NUMBER_LARGE_VS_TINY_UP	38	0.60101	1.86182	0.0011534	0.00693401	0.00388562	3177	tags=39%, list=11%, signal=35%	SERPINE2/IL1R1/FKBP11/LTV1/FADS1/SMIM7/ARHGAP9/ST6GALNAC4/HSPA4/S100A6/DIO2/GCAT/JKAMP/PGAM1/FKBP1A
ICHIBA_GRAFT_VERSUS_HOST_DISEASE_35D_UP	116	0.493073	1.86155	0.000261643	0.00296587	0.00166199	2868	tags=28%, list=10%, signal=26%	S100A8/S100A9/SAA1/LRG1/SERPINA3/LAPTM5/COLGALT1/QSOX1/GPX3/FPR1/CASP1/CYBA/GBP3/PROCR/TMSB4X/SELPLG/PKM/LTF/STAT1/NABP1/NNMT/S100A6/CTPS1/GRN/PSMB9/CYP26A1/PTPN1/NAMPT/GLTP/CD7/PLD3/CD14/RBM3
TOOKER_GEMCITABINE_RESISTANCE_UP	78	0.52553	1.86071	0.000252717	0.00296587	0.00166199	3751	tags=46%, list=13%, signal=40%	ABCC2/PON2/BAMBI/IFI6/FTH1/SAT1/PDE4B/TIMM10B/TRIM22/AATF/SP110/TOMM34/CCNB1IP1/ACSL5/CIAPIN1/ASS1/WDR74/AIMP2/HSPA4/IRF9/ISG15/ITPA/CPOX/BDH2/TRIM21/ARFIP2/TPI1/GRHPR/ODC1/PALLD/PFDN5/MRPL17/BLVRB/RRP8/ABHD14A/ATP5PO
REACTOME_RNA_POLYMERASE_I_TRANSCRIPTION	102	0.50226	1.86059	0.000516129	0.00377836	0.00211729	5175	tags=42%, list=18%, signal=35%	HIST1H2AC/POLR1E/HIST1H2BK/HIST2H2AA4/HIST1H3G/HIST1H2BG/TWISTNB/CCNH/TAF1A/HIST1H2BD/HIST2H4A/GTF2H2/CD3EAP/ERCC2/POLR1C/UBTF/EHMT2/HDAC1/RRN3/HIST1H2BN/HIST2H2BE/TAF1D/HIST1H3H/H2AFX/POLR2K/TAF1B/ZNRD1/TTF1/POLR1B/CHD3/HIST1H2BJ/H2AFZ/POLR2L/KAT2B/POLR2H/HIST1H2BC/POLR2F/GTF2H5/CBX3/MBD3/GTF2H1/POLR2E/HIST1H4A
GU_PDEF_TARGETS_UP	70	0.53426	1.86006	0.00074239	0.00501482	0.00281016	938	tags=23%, list=3%, signal=22%	VIM/SERPINA1/CDH2/ZEB1/ITGA5/TGFBI/WNT5A/COL4A2/FN1/TNC/HIF1A/VEGFA/PLCB4/SDC2/RAC3/COL4A1
COLIN_PILOCYTIC_ASTROCYTOMA_VS_GLIOBLASTOMA_UP	32	0.623367	1.85848	0.00228206	0.0114665	0.00642551	1779	tags=38%, list=6%, signal=35%	DNER/SERPINE2/SERPINA3/ALDOC/SOD2/FTH1/GPRC5B/HLA-A/TSPAN7/ATP1A2/PLA2G2A/HTRA1
GRADE_COLON_AND_RECTAL_CANCER_UP	286	0.442279	1.85819	0.000314169	0.00296587	0.00166199	5268	tags=46%, list=18%, signal=38%	CFB/COPS8/SOD2/TGFBI/GDF15/DGAT2/NIP7/DNAJC2/ALG1/TBCE/AURKA/VEGFA/PLCB4/PLAU/ATP6AP2/ZMYND8/MTHFD2/NOP56/CCDC85B/NOL8/RCN1/COL4A1/DRG1/BACE2/DNAJA3/PRDX1/NMI/UTP11/CTSB/PKM/WDR74/METTL2B/LYAR/AARS/NOB1/CNBP/ABCF1/RBM26/CCT5/HSPA4/LDHA/TMEM97/GCLC/LRP8/FXYD5/CKS2/THEM6/HELLS/IFITM1/TGDS/POMP/ECD/KARS/PFDN2/EIF3B/HM13/DAP3/TARS/TALDO1/DDIT4/DDX1/ATIC/ENG/PNPT1/PDCD2L/PA2G4/EIF4A1/VBP1/CCT8/SUB1/AN…
REACTOME_DETOXIFICATION_OF_REACTIVE_OXYGEN_SPECIES	33	0.617345	1.858	0.00137773	0.00798455	0.00447432	4975	tags=58%, list=17%, signal=48%	SOD2/GSR/TXNRD1/GPX3/NCF2/GPX8/CYBA/P4HB/PRDX1/TXN/CYCS/PRDX3/PRDX6/ERO1A/TXN2/ATOX1/PRDX5/NUDT2/CCS
BHATTACHARYA_EMBRYONIC_STEM_CELL	77	0.524937	1.85663	0.000502513	0.00377703	0.00211654	5167	tags=52%, list=18%, signal=43%	SERPINH1/BRIX1/FABP5/SRSF7/DDX21/MTHFD2/JADE1/CALU/MGST1/KPNA2/HSPA4/KRT8/IFITM1/PODXL/TPX2/CYP26A1/EIF4A1/CCT8/GNL3/IDH1/SMS/EPRS/PSMA2/SSB/CDK1/TUBB/NASP/NANOG/TUBB6/CCNB1/SLC16A1/SET/IMPDH2/RPL24/LDHB/TNNC2/HNRNPAB/SNRPF/PSIP1/PSMA3
GARCIA_TARGETS_OF_FLI1_AND_DAX1_DN	158	0.473103	1.85653	0.000278087	0.00296587	0.00166199	5091	tags=48%, list=18%, signal=40%	SLC7A11/TRMT6/PPIL1/MAPRE1/TOE1/RSL1D1/ZWINT/SRRM1/SCLY/TWISTNB/NOP56/RRP9/RRP15/GEMIN5/TRMT61A/RASSF1/TYMS/STAMBPL1/PSMC3IP/INF2/CHCHD3/SCFD1/GABPB1/MPHOSPH10/CDC37/EED/PPCDC/SLC43A3/FEN1/RPIA/NOLC1/HAUS2/KCNE3/TAF3/GINS3/MIR4435-2HG/ELOC/TIMM10/CYB5B/LMNB1/COA4/TIPIN/NAGPA/AAGAB/YAF2/TELO2/SLC5A6/AMDHD2/CENPX/C19orf48/UTP23/ELP5/H2AFZ/SNRPC/FDXACB1/RCC1/ITGAE/CENPM/RPS10/SPATA5/SFR1/SLC25A10/DD…
MARZEC_IL2_SIGNALING_UP	106	0.498043	1.85509	0.000259067	0.00296587	0.00166199	2962	tags=42%, list=10%, signal=37%	CXCL8/BIRC3/TNFSF14/IL1A/PDCD11/FGFR1/CCND1/FGF2/PNP/VEGFA/PPAT/UMPS/DUSP4/BCCIP/PHLDA2/NOP2/HK2/PTRH2/LIF/DUSP2/BCL2L1/PHLDA1/PUS1/SOCS1/TNFRSF10A/PINX1/TNFRSF9/HSPD1/CCND3/POLR1C/DKC1/IER3/POLR3K/PEA15/DHODH/CTPS1/SPRED1/TRIB3/PDCD2L/MAP3K20/GNL3/TNFRSF21/TNFRSF12A/DLST
REACTOME_GLYCOLYSIS	69	0.533075	1.85108	0.00123396	0.00736045	0.00412459	3090	tags=32%, list=11%, signal=28%	ALDOC/ENO2/GAPDH/GNPDA1/HK2/PGK1/ADPGK/PFKFB3/ENO1/PKM/SEH1L/HK1/ALDOA/PPP2CB/NUP54/NUP62/PFKP/BPGM/PGAM1/TPI1/NUP35/NUP43
CHO_NR4A1_TARGETS	26	0.649477	1.85044	0.00290763	0.0137305	0.00769416	3456	tags=35%, list=12%, signal=30%	HMOX1/BIRC3/INSIG1/ATF3/HERPUD1/ATF4/KDM5A/EAF1/DDIT3
REACTOME_RNA_POLYMERASE_III_TRANSCRIPTION	41	0.588824	1.84897	0.0016317	0.00906172	0.00507793	4344	tags=51%, list=15%, signal=43%	POLR3G/POLR3GL/SNAPC1/CRCP/SNAPC3/POLR1C/POLR3K/POLR3H/GTF3C6/BRF2/POLR3A/POLR3F/POLR2K/SNAPC4/SSB/POLR2L/NFIA/POLR3D/POLR2H/POLR2F/SNAPC5
ZHANG_ANTIVIRAL_RESPONSE_TO_RIBAVIRIN_UP	27	0.641078	1.8484	0.00268877	0.0129472	0.00725524	2094	tags=44%, list=7%, signal=41%	CFH/C1S/C1R/IFI6/APOL1/IFITM3/PIM2/ASS1/IFI27/STAT1/IFITM1/TIAL1
BROWNE_HCMV_INFECTION_4HR_UP	45	0.578591	1.84668	0.000474383	0.00372637	0.00208815	1664	tags=33%, list=6%, signal=31%	PCDH7/SOD2/PMAIP1/IFIT3/AREG/TFRC/IFIT1/GPRC5B/IFIT2/EFNB2/PTGS2/GRIK2/POLG2/OASL/ISG15
PID_INTEGRIN3_PATHWAY	41	0.588004	1.8464	0.0016317	0.00906172	0.00507793	2080	tags=32%, list=7%, signal=29%	FBN1/TGFBI/PVR/FN1/TNC/VEGFA/PLAU/LAMB1/COL4A1/ITGB3/PLAUR/TGFBR2/SPHK1
AMIT_EGF_RESPONSE_120_HELA	66	0.536344	1.84625	0.000983526	0.00615761	0.00345055	2908	tags=44%, list=10%, signal=40%	CDKN1A/CXCL8/SNAI1/AREG/IL27RA/GDF15/GADD45A/TAGLN/SAT1/CXCL1/ZPR1/CXCL2/F3/DUSP4/BDNF/GEM/FOSL1/PLAUR/TNFRSF10B/IER5/DAXX/ZFP36L2/PUS3/EPHA2/CDC42EP2/TGFA/HBEGF/MVD/MAP3K14
SMIRNOV_RESPONSE_TO_IR_2HR_UP	52	0.560668	1.84527	0.00142518	0.00819745	0.00459362	2425	tags=42%, list=9%, signal=39%	CDKN1A/TNFSF9/SLC7A11/TIGAR/PMAIP1/PLK2/AEN/GDF15/GADD45A/MDM2/ATF3/CD83/FOSL1/TNFRSF10B/IER5/JUN/ZFP36L2/IER3/C16orf72/PHF14/FAS/PTGER4
GALINDO_IMMUNE_RESPONSE_TO_ENTEROTOXIN	72	0.527578	1.84504	0.000745898	0.00501961	0.00281285	3874	tags=51%, list=14%, signal=45%	ITGA5/SQSTM1/PCDH7/TNFSF9/GLRX/IL1B/GADD45A/TNIP1/CSF3/GAPDH/CD83/VEGFA/TNFAIP3/SOCS3/PTGS2/NFKB2/FOSL1/DUSP2/PLAUR/PHLDA1/DUSP1/PKM/HERPUD1/IER3/NOCT/ADORA2B/IKBKE/BCL3/SLFN12/CD14/ODC1/TSC22D1/EHD1/PDLIM7/GADD45B/CEBPB/SRPRA
BOQUEST_STEM_CELL_CULTURED_VS_FRESH_UP	402	0.424835	1.84491	0.000338868	0.00296587	0.00166199	2465	tags=26%, list=9%, signal=24%	DCN/CFH/SRGN/CDH2/SERPINE2/NPR3/IFI44/AKR1C1/LOX/SERPINA3/GGT5/CXCL8/CDKN1C/MAFB/PAPSS2/SOD2/SLC7A11/TIGAR/CFI/PAPPA/PMAIP1/TGM2/WNT5A/PSAT1/NQO1/DKK2/TXNRD1/ADAM12/GDF15/ME1/TNFAIP6/FN1/CLIC2/CES1/IL15RA/LIMCH1/RPS6KA2/FOXO1/GPX3/ABCA6/CXCL1/FGF2/APOL3/ID1/SRPX/CLIC3/ATF3/CD83/CXCL2/EMC1/SLC16A3/SYNM/SRSF7/SELENBP1/ATF5/SEL1L3/CBS/CXCL3/TNFAIP3/G6PD/SYNC/BAX/TMEM100/GEM/RGS5/MAN1A1/STC2/ANGPTL4/…
BURTON_ADIPOGENESIS_6	184	0.46033	1.84254	0.000283286	0.00296587	0.00166199	4874	tags=41%, list=17%, signal=34%	S100A8/GBE1/PON2/GSR/BNIP3/HSD11B1/ME1/HIBADH/DECR1/CBR1/APMAP/SAMM50/SLC19A1/NR1H3/CDKN2C/ALAS1/MGST1/MGLL/ISOC1/REEP6/CHCHD3/FAM49B/NABP1/OGDH/NNMT/FAH/NOCT/CFD/ACYP2/MAP4K4/PARM1/ACAD9/NDUFB5/QDPR/SLC25A1/CYB5A/HIPK2/ABCD2/CYB5B/ARL4A/C20orf27/GRHPR/TUFM/BCKDHB/DLST/SPCS3/AOC3/CAVIN2/NDUFA9/CMBL/EHD1/CIDEC/RNF11/MPDU1/KAT2B/ATP5PO/SDHA/ATP5F1D/NDUFB2/NDUFS3/COX7A2/PDHB/LIAS/NDUFB9/CDIP1/NDUFB3…
GUTIERREZ_MULTIPLE_MYELOMA_UP	36	0.600928	1.84219	0.0016033	0.00898552	0.00503523	2657	tags=39%, list=9%, signal=35%	IFI6/SSR3/VDAC2/YKT6/EMC7/TAF9/SUCLG2/ATP6V0E1/SELENOP/VDAC1/BUD23/PTP4A1/EID1/SRP72
KEGG_GLYCOLYSIS_GLUCONEOGENESIS	55	0.554016	1.84108	0.001443	0.00825343	0.00462499	2932	tags=38%, list=10%, signal=34%	ALDOC/ENO2/GAPDH/ALDH3B1/ALDH1B1/HK2/ALDH9A1/PGK1/PGM1/ENO1/PKM/LDHA/HK1/ALDOA/ADH5/PFKP/BPGM/ALDH3A1/PGAM1/TPI1/PDHA1
KYNG_ENVIRONMENTAL_STRESS_RESPONSE_UP	50	0.565385	1.8394	0.000478583	0.00372637	0.00208815	1427	tags=26%, list=5%, signal=25%	IGFBP3/VIM/GLRX/PRSS23/FN1/FLOT1/BNIP3L/CXCL2/EIF4E/CALU/FGFR4/DAXX/CYCS
ELVIDGE_HYPOXIA_UP	171	0.462887	1.83863	0.000280348	0.00296587	0.00166199	2254	tags=34%, list=8%, signal=31%	IGFBP3/CA9/LOX/STC1/ALDOC/GBE1/ASPH/FAM216A/TGFBI/PDGFRL/SLCO4A1/VLDLR/SCNN1B/P4HA1/BNIP3/GLRX/EGLN3/NFIL3/QSOX1/GDF15/PAM/SPAG4/S100A4/LIMCH1/SAT1/CD59/ENO2/BNIP3L/SRPX/ATF3/VEGFA/ADGRE2/FOS/ZMYND8/ITPR1/STC2/ANGPTL4/HK2/PGK1/PGM1/LOXL2/TMEM45A/PDK1/PLAUR/CCN5/ECE1/PFKFB3/DUSP1/FAM162A/JUN/SRD5A3/S100A6/ADORA2B/P4HA2/DDIT4/AC074143.1/PFKP/CYB5A
REACTOME_CDK_MEDIATED_PHOSPHORYLATION_AND_REMOVAL_OF_CDC6	70	0.528097	1.8386	0.00123732	0.00736613	0.00412777	6503	tags=63%, list=23%, signal=49%	PSMB8/PSMC5/PSME3/ANAPC7/PSMB10/PSMA6/PSMC4/PSMB9/PSMD10/PSME2/PSMA5/CDC26/PSMD7/PSMD13/PSMB5/PSMD11/PSME1/ANAPC4/PSMA2/PSMA1/PSMC3/RPS27A/PSMD2/UBC/PSMD4/UBE2C/PSMC2/PSMB6/PSMA7/PSMD12/PSMD14/PSMB4/UBA52/PSMB3/PSMA3/ANAPC2/ANAPC5/ANAPC16/PSMC6/PSMB7/ANAPC11/PSMB1/CDC6/PSMB2
SMID_BREAST_CANCER_LUMINAL_B_DN	490	0.415823	1.83836	0.000366838	0.00301754	0.00169094	1317	tags=20%, list=5%, signal=19%	C3/IGFBP3/DCN/KRT14/ABCC2/SRGN/S100A8/C1S/SERPINE2/PROS1/KRT16/KYNU/CA9/NPR3/AKR1C1/PDZK1IP1/MME/S100A9/SAA1/IL7R/PTGFR/CXCL8/CDKN1C/PAPSS2/NSG1/SOD2/BIRC3/CFI/MFGE8/FERMT2/CCN3/COL4A2/IL32/PSAT1/IL27RA/PCOLCE2/AKR1B10/NFIL3/GBP1/EDN2/MAP1B/ACKR1/ICAM1/SERPINH1/SVEP1/CLIC2/PML/TAGLN/BAG2/SAT1/TNC/FBLN5/LTBP1/CXCL1/RIPOR2/ID1/MT1F/SRPX/TM4SF1/CLIC3/FABP5/CXCL2/CCL20/SYNM/SEL1L3/PGRMC1/KHDRBS3/DNAJ…
REACTOME_PREFOLDIN_MEDIATED_TRANSFER_OF_SUBSTRATE_TO_CCT_TRIC	27	0.637502	1.83809	0.00336097	0.0150292	0.00842196	4552	tags=70%, list=16%, signal=59%	CCT6A/CCT2/CCT5/TUBA1C/TCP1/PFDN2/CCT4/CCT3/VBP1/CCT8/CCT7/PFDN5/TUBB3/TUBB4B/TUBB2A/ACTB/TUBB6/PFDN6/TUBB2B
REACTOME_POSITIVE_EPIGENETIC_REGULATION_OF_RRNA_EXPRESSION	97	0.500069	1.83803	0.000512426	0.00377836	0.00211729	5175	tags=41%, list=18%, signal=34%	HIST1H2AC/POLR1E/HIST1H2BK/HIST2H2AA4/HIST1H3G/DDX21/HIST1H2BG/TWISTNB/TAF1A/HIST1H2BD/HIST2H4A/CD3EAP/POLR1C/MYBBP1A/EHMT2/HDAC1/HIST1H2BN/HIST2H2BE/TAF1D/HIST1H3H/H2AFX/POLR2K/TAF1B/ZNRD1/TTF1/POLR1B/CHD3/HIST1H2BJ/H2AFZ/POLR2L/KAT2B/ACTB/POLR2H/HIST1H2BC/SMARCA5/POLR2F/CBX3/MBD3/POLR2E/HIST1H4A
KEGG_NOD_LIKE_RECEPTOR_SIGNALING_PATHWAY	55	0.552655	1.83655	0.001443	0.00825343	0.00462499	2965	tags=35%, list=10%, signal=31%	CXCL8/BIRC3/IL1B/IKBKG/CXCL1/CASP8/CXCL2/TRIP6/TNFAIP3/CASP1/NLRP1/MEFV/MAPK12/MAP3K7/SUGT1/PSTPIP1/HSP90AA1/HSP90AB1/NLRP3
KEGG_OXIDATIVE_PHOSPHORYLATION	124	0.481734	1.83552	0.00026295	0.00296587	0.00166199	7244	tags=56%, list=25%, signal=42%	ATP6V0A4/ATP6V1E1/ATP6V0B/ATP5PD/ATP5F1B/ATP6V1D/COX7A2L/ATP6V0E1/NDUFB5/ATP5F1E/ATP5MC2/CYC1/NDUFA8/ATP5MC1/ATP6V1A/UQCR11/NDUFA9/NDUFV3/NDUFA6/COX15/ATP5PO/SDHA/ATP5F1D/ATP5PB/NDUFB2/TCIRG1/NDUFS3/COX7A2/NDUFA10/ATP5F1C/NDUFB9/ATP5MC3/NDUFB3/ATP6V0C/NDUFB1/UQCRQ/NDUFC2/UQCRHL/PPA2/NDUFA3/COX5B/NDUFS2/NDUFB8/ATP5F1A/NDUFS6/SDHD/NDUFA11/UQCR10/NDUFS5/NDUFA4/ATP6V1G1/UQCRB/NDUFV1/UQCRFS1/NDUFAB1/N…
REACTOME_BIOSYNTHESIS_OF_THE_N_GLYCAN_PRECURSOR_DOLICHOL_LIPID_LINKED_OLIGOSACCHARIDE_LLO_AND_TRANSFER_TO_A_NASCENT_PROTEIN	74	0.520432	1.83533	0.000990589	0.00618613	0.00346653	5752	tags=54%, list=20%, signal=43%	GFPT2/ALG1/UAP1/ST3GAL3/ST3GAL2/CTSA/NUS1/SLC35C1/SLC17A5/ALG2/GNE/ST6GALNAC4/NEU1/SRD5A3/ST8SIA1/CMAS/NEU3/DHDDS/ST3GAL5/MVD/MPI/ALG12/ST6GALNAC3/ST6GALNAC1/AMDHD2/MPDU1/RFT1/GMPPA/GNPNAT1/ALG3/ALG5/NANS/ST3GAL1/DPM2/TSTA3/PGM3/ALG14/DOLPP1/GMPPB/FUOM
MIYAGAWA_TARGETS_OF_EWSR1_ETS_FUSIONS_DN	226	0.446487	1.83369	0.000293427	0.00296587	0.00166199	2526	tags=25%, list=9%, signal=23%	IGFBP3/DNER/PID1/PLOD2/COL8A1/CA9/AKR1C1/MME/STC1/CCDC80/ADAMTS12/C10orf90/CXCL8/HAS2/TAF13/BNIP3/IL1R1/CHN1/ADAM12/QSOX1/RPS6KA2/LTBP1/GFPT2/SRPX/SYNM/MFSD2A/F3/PLAU/ACTRT3/SYNC/RBMS3/RIOK1/NRP1/STC2/LIF/LOXL2/HMGA2/ASS1/GLT8D2/IRS1/NABP1/RECK/RAB27A/CALM2/TSPAN5/SPRED1/PEX2/CA12/OSMR/TNFRSF11B/ADAM19/DCBLD2/SEMA7A/RGMB/MOSPD1/MARCKS
DEBIASI_APOPTOSIS_BY_REOVIRUS_INFECTION_UP	295	0.434567	1.83303	0.00031746	0.00296587	0.00166199	3815	tags=30%, list=13%, signal=26%	IFI44L/IFI44/CXCL8/ZEB2/PMAIP1/IFIT3/IFRD1/IFI6/GBP1/GADD45A/DUSP3/PML/UBE2V2/UBE2L6/TIMM17A/CXCL1/DNAJC2/FGF2/RRS1/IFITM3/ATF3/CXCL2/TRIM22/ZWINT/IFI35/PPAT/SNAPC1/PNO1/TNFAIP3/TWISTNB/SP100/GEM/ZNF330/TAF1A/DNAJB9/NLE1/EIF4E/FGFR1OP/GTF2H2/CRK/CREB5/NMI/DUSP1/MAK16/IFI27/BLZF1/TM2D1/STAT1/E2F6/JUN/DCTN6/BUB3/NECAP1/OASL/IRF9/ISG15/IFITM1/TGDS/PSMB9/SHOX2/LSM6/TRIM21/GPN1/CREM/TIAL1/GEMIN2/SIKE1…
LINDVALL_IMMORTALIZED_BY_TERT_DN	70	0.526422	1.83277	0.00148478	0.00839821	0.00470612	2060	tags=30%, list=7%, signal=28%	CFB/PLOD2/AKR1C1/LGALS3BP/CCDC80/PAPPA/ADAM12/MAP1B/FN1/FAP/SAT1/ENO2/CAPN5/CXCL1/SELPLG/AIMP2/MZT1/NNMT/SLC43A3/EIF2B3/ANTXR1
REACTOME_NONSENSE_MEDIATED_DECAY_NMD	112	0.487823	1.83254	0.000259202	0.00296587	0.00166199	8783	tags=71%, list=31%, signal=49%	RPS27L/NCBP2/UPF2/SMG8/UPF3A/RBM8A/MAGOHB/UPF3B/SMG6/RPS12/EIF4A3/RPL9/ETF1/RPS27A/DCP1A/RPS10/PPP2CA/RPS20/EIF4G1/SMG9/RPL24/RPL35A/RPLP1/RPL17/RPL8/RPS26/RPS3/RPL13A/FAU/UBA52/RPS3A/RPS19/RPL26L1/RPS28/RPS23/RPL38/RPL41/RPS9/RPSA/RPS6/GSPT1/RPL31/RPS2/RPL27A/RPL5/RPS24/RPS17/RPL34/RPL36AL/RPS25/RPL11/RPS21/RPS29/RPS5/RPL13/RPLP2/RNPS1/RPLP0/RPL22/RPL32/SMG5/RPS13/RPL36/RPL21/NCBP1/RPL7A/RPL23A/…
VECCHI_GASTRIC_CANCER_ADVANCED_VS_EARLY_UP	158	0.466768	1.83167	0.000278087	0.00296587	0.00166199	1339	tags=22%, list=5%, signal=21%	IGFBP3/PLOD2/COL8A1/LOX/ADAMTS12/MAFB/SOD2/FBN1/GPC6/NXN/C3AR1/ADAM12/TNFAIP6/FN1/FAP/PDGFC/COL12A1/ESM1/TWIST1/GFPT2/CCDC88A/TMEM132A/PLAU/FSTL1/STC2/ANOS1/SFMBT2/COL4A1/CPNE8/TMEM45A/RBMS1/CMTM3/CEP170/RAB31/BGN
HOSHIDA_LIVER_CANCER_SUBCLASS_S1	223	0.446423	1.83039	0.000294377	0.00296587	0.00166199	4145	tags=36%, list=15%, signal=31%	SRGN/RIT1/LOX/LGALS3BP/LAPTM5/IL7R/ALOX5AP/FBN1/TIMP2/HCLS1/COL4A2/CHN1/C3AR1/QSOX1/ME1/PAM/HEXA/MAP1B/TAGLN/ACTA2/IL15RA/LSP1/CXCL1/HIF1A/PNP/LAMB1/MTHFD2/GEM/CAPZA1/CYBA/PGK1/CDC20/COL4A1/PIM2/LGALS9/PLAUR/RAB31/PROCR/TMSB4X/LTF/ATP6V0B/IER3/PRMT5/HK1/PEA15/ALDOA/DUSP5/GRN/ARHGDIB/IFI30/TPM2/LCP1/TSPAN3/PKN1/FLNA/IKBKE/ANXA5/PLD3/TRIP10/ADAM9/EFEMP1/CCN2/FHL3/MSN/AP2S1/CD37/ARPC1B/ADAM15/LYN/GN…
QI_HYPOXIA	127	0.479651	1.83025	0.000265957	0.00296587	0.00166199	2872	tags=31%, list=10%, signal=28%	IGFBP3/HMOX1/PLOD2/CDKN1A/CA9/LOX/STC1/ALDOC/TNFSF9/GBE1/VLDLR/P4HA1/BNIP3/EGLN3/KDELR3/PLOD1/INSIG1/CAPN5/VEGFA/PGF/JMJD6/HK2/PGM1/PDK1/DUSP1/CIART/SAP30/IER3/HK1/GTF2E2/P4HA2/DDIT4/CDC42EP2/PFKP/PGAM1/HMGCL/PPP1R3B/GRHPR/MVD
VANOEVELEN_MYOGENESIS_SIN3A_TARGETS	212	0.448143	1.82978	0.000287853	0.00296587	0.00166199	3981	tags=36%, list=14%, signal=31%	HMOX1/COLGALT1/FTL/SOD2/NFIL3/TXNRD1/TRMT6/TMEM206/ERGIC1/LDLR/COA7/SLC7A6OS/ZCCHC24/RCN1/COQ10B/VAMP3/LIF/NMD3/TOMM34/SCLT1/DUSP2/MSANTD4/GEMIN5/ABHD6/HOXC8/GNL2/CD3EAP/BLZF1/RIOX2/CIART/SLC12A9/EDA2R/E2F6/CCT5/BAZ1A/MZT1/RNF114/CMAS/N6AMT1/DDX51/PHF5A/RPP38/CCDC71/DAP3/CHCHD4/SUCLG2/HAX1/FAM53B/PPP2R3C/PTPN1/CTU2/HIPK2/SSTR1/EIF2B1/SURF2/URB2/ANXA5/FHIT/GFER/ATP6V1A/POP7/TERF2IP/PNPLA6/MRPS33/A…
REACTOME_REGULATION_OF_MITOTIC_CELL_CYCLE	84	0.508733	1.82905	0.000504286	0.00377703	0.00211654	6503	tags=60%, list=23%, signal=46%	AURKA/PSMB8/PSMC5/CDC20/PSME3/ANAPC7/PSMB10/BUB3/PSMA6/PSMC4/PSMB9/PSMD10/PSME2/PSMA5/CDC26/PSMD7/PSMD13/PSMB5/PSMD11/PSME1/ANAPC4/PSMA2/PSMA1/PSMC3/CDK1/RPS27A/PSMD2/SKP1/CCNB1/UBC/PSMD4/UBE2C/PSMC2/PSMB6/PSMA7/PSMD12/PSMD14/PSMB4/UBA52/PSMB3/PSMA3/ANAPC2/MAD2L1/ANAPC5/ANAPC16/PSMC6/PSMB7/ANAPC11/PSMB1/PSMB2
SHAFFER_IRF4_TARGETS_IN_MYELOMA_VS_MATURE_B_LYMPHOCYTE	99	0.495918	1.82733	0.000514403	0.00377836	0.00211729	3115	tags=40%, list=11%, signal=36%	ADGRE5/TIMP2/P4HA1/NFIL3/PAM/PNP/ATF3/UAP1/SLAMF7/LDLR/FKBP11/TNFAIP3/SSR1/PPP1R2/PABPC4/PGK1/DNAJB9/PIM2/PDK1/BMP6/CYCS/LDHA/NR4A1/TXNDC5/SPATS2/DUSP5/APOBEC3B/HMBS/VDAC1/SEC62/NAMPT/SUB1/HSP90AA1/PAICS/ATF4/GAA/SLC31A1/GARS/EIF2S2/GNG7
REACTOME_RESPONSE_TO_ELEVATED_PLATELET_CYTOSOLIC_CA2PLUS	118	0.48299	1.82729	0.00026295	0.00296587	0.00166199	2543	tags=24%, list=9%, signal=22%	SERPINA1/SRGN/PROS1/LGALS3BP/SERPINA3/PCDH7/PPBP/QSOX1/FN1/HABP4/PSAP/VEGFA/CYB5R1/TOR4A/EGF/CALU/ITGB3/TMSB4X/FAM49B/CFD/ALDOA/GAS6/PCYOX1L/SYTL4/SELENOP/VEGFC/FLNA/ANXA5
WANG_TUMOR_INVASIVENESS_UP	354	0.425109	1.82708	0.000331345	0.00296587	0.00166199	5891	tags=44%, list=21%, signal=36%	VIM/PROS1/IL7R/TGFBI/PLOD1/FN1/CCND1/IFITM2/HIF1A/GAPDH/PNP/IFITM3/SSR3/EZR/SRSF7/STIP1/RASA3/LAMB1/PPAN/AMD1/PSMC5/TEX10/TXNDC9/IER2/VDAC2/PMPCA/KPNA2/CCT2/TACC3/AIMP1/ENO1/ZNF780A/TOMM20/SUPT5H/PKM/GLIPR2/YWHAG/STAT1/ABCF1/ATP5PD/POLR1C/CCT5/HSPA4/SERBP1/PSPH/NUDT5/ANTXR2/CCDC47/SRSF3/IFITM1/PIP4K2A/S100A6/WDR3/PNN/EIF2B3/HSPH1/EIF3B/CLTA/ABCF3/HEBP1/TAF3/DDX1/ADH5/CCT3/AK2/SEPT7/SEC62/FKBP9/VD…
LINDSTEDT_DENDRITIC_CELL_MATURATION_B	45	0.571884	1.82528	0.000711575	0.00485409	0.00272009	4691	tags=47%, list=16%, signal=39%	BIRC3/GADD45A/TNIP1/IL15RA/CD83/TNFAIP3/DUSP4/NFKB2/RELB/TNFRSF9/EED/PSME2/MARCKS/MAP3K14/NR4A3/LYN/TAP1/CXCR4/PALM2-AKAP2/NBN/STK4
BRUECKNER_TARGETS_OF_MIRLET7A3_DN	73	0.519886	1.82334	0.00124378	0.00737591	0.00413325	3809	tags=40%, list=13%, signal=35%	VIM/LGALS3BP/AKR1B1/MFGE8/DCBLD1/PLK2/COL4A2/AKR1B10/PRSS23/FN1/CXCL1/GPRC5B/CXCL3/GPC1/TM2D2/LOXL2/NNMT/NXPE3/COTL1/MT1X/EIF5/DIO2/HSP90AA1/GLS/PPARG/NRP2/LACTB/EPB41L2/PTGES
XU_HGF_SIGNALING_NOT_VIA_AKT1_6HR	25	0.646941	1.82262	0.00355556	0.0156889	0.00879162	4002	tags=64%, list=14%, signal=55%	SMTN/HPCAL1/SAT1/PLAU/PHLDA2/ANGPTL4/ERCC1/PLAUR/TNFRSF10B/PFKFB3/JUN/NAV3/HBEGF/EHD1/MAMLD1/IL6ST
RHODES_CANCER_META_SIGNATURE	65	0.530817	1.82142	0.00098401	0.00615761	0.00345055	5346	tags=58%, list=19%, signal=48%	FAP/MTHFD2/SSR1/NCBP2/KPNA2/HSPD1/CCT5/LDHA/CKS2/CCT4/PSMC4/TARS/HDAC1/TPX2/RBM4/PSME2/UBE2S/SMARCA4/PAICS/MRPS12/NME1/E2F5/G3BP1/SSBP1/IFNGR2/SNRPE/CDK1/HSPE1/TOP2A/EIF4A3/TUBB/PCLAF/CBX3/ACLY/MANF/TRAF4/SNRPF/TSTA3
ALONSO_METASTASIS_UP	184	0.454918	1.82087	0.000283286	0.00296587	0.00166199	5262	tags=45%, list=18%, signal=37%	CDH2/CDKN1A/CA9/SERPINA3/TXNRD1/MDM2/MAPRE1/IFITM2/HSPA8/SDCBP/EEF1AKNMT/IL1RL1/HIBADH/ENC1/TP53I3/DCAF13/BCCIP/VKORC1/DHRS11/GTF2H2/GRB2/ENO1/CTSB/ATP6V0B/TGFBR2/AKT1S1/CCT5/TMEM199/TMBIM4/DUSP12/POLR3K/PPP2CB/SLC25A33/KLF10/SELENOP/RBM4/SLC25A17/EIF5/ELOC/TIMM10/MMADHC/VDAC1/ADSL/CYC1/VBP1/CLIC4/SUB1/PAICS/GABARAP/LIPA/UBL5/TMCO1/MRPS22/TUBB3/SMIM12/LRPAP1/CKS1B/RAN/CD63/SKP1/RAB1A/RPS10/LAMTOR…
REACTOME_METABOLISM_OF_VITAMINS_AND_COFACTORS	179	0.455336	1.81907	0.000282326	0.00296587	0.00166199	3635	tags=32%, list=13%, signal=28%	AKR1C1/SDC3/AKR1C3/AOX1/GPC6/TPK1/SLC25A32/AKR1B10/NMNAT1/MOCS2/LDLR/RDH11/PTGS2/SDC2/GPC1/MTHFD2/PARP10/VNN1/GCHFR/SLC19A1/MTHFD2L/VKORC1/MMAA/FLAD1/NFS1/PTS/PPCDC/LRP8/NNMT/RFK/UBIAD1/LRP12/COQ3/SLC52A2/MMAB/MMADHC/CYB5A/CD320/NAMPT/SLC25A19/HSP90AA1/GSTO1/IDH1/ENPP1/MTHFD1L/AGRN/PDSS2/COQ9/PDSS1/SLC5A6/GPC2/MMACHC/PARP8/FPGS/NMNAT2/NAXD/SPR
CHARAFE_BREAST_CANCER_LUMINAL_VS_BASAL_DN	452	0.414042	1.81777	0.00035727	0.00298207	0.00167107	2838	tags=31%, list=10%, signal=28%	C3/CFB/KRT14/COL8A1/C1S/SERPINE2/KRT16/IFI44/AKR1C1/PDZK1IP1/MME/LOX/COPS8/SAA1/CCDC80/C1R/IL7R/AKR1B1/ADGRE5/AKR1C3/DPYD/TNFRSF10D/BIRC3/CFI/MFGE8/IFIT3/DCBLD1/TGFBI/IL1A/NXN/COL4A2/LINC01133/PSAT1/FAM83A/AKR1B10/GBP1/PTPRM/ICAM1/TRMT6/STAT4/FAP/CD59/PDGFC/FBLIM1/CXCL1/HIF1A/FGF2/MT1F/SRPX/RGL1/TOX2/CCDC88A/CXCL2/SEL1L3/TRIM22/F3/PLAU/CBR1/DNAJB4/BIN1/FSTL1/B2M/CASP4/CXCL3/TNFAIP3/PTGS2/PSMB8/GP…
REACTOME_RNA_POLYMERASE_III_TRANSCRIPTION_INITIATION_FROM_TYPE_1_PROMOTER	28	0.626958	1.81705	0.00384441	0.0165998	0.00930203	5681	tags=57%, list=20%, signal=46%	POLR3G/POLR3GL/CRCP/POLR1C/POLR3K/POLR3H/GTF3C6/POLR3A/POLR3F/POLR2K/POLR2L/POLR3D/POLR2H/POLR2F/POLR2E/POLR3B
ELVIDGE_HIF1A_AND_HIF2A_TARGETS_UP	41	0.578609	1.81689	0.0020979	0.0109177	0.00611794	3529	tags=46%, list=12%, signal=41%	LSG1/CCDC86/RRS1/OSTM1/SLC35C1/FLAD1/TOR3A/CCND3/HSPA4/CHKA/RFK/POLR3K/HSPH1/RPP40/RRP12/SRM/ABCF2/SLC5A6/WDR77
WONG_PROTEASOME_GENE_MODULE	50	0.558346	1.81651	0.000957167	0.00604337	0.00338653	5273	tags=46%, list=19%, signal=38%	SQSTM1/PSMB8/PSMC5/CDC20/PSME3/PSMB10/PSMD10/PSMA5/USP39/PSME1/PSMA1/USP18/PSMC3/USP11/UBE2T/UBE2C/PSMB6/PSMA7/PSMD12/PSMD14/PSMB4/PSMB3/UBE3A
CHUANG_OXIDATIVE_STRESS_RESPONSE_UP	28	0.626662	1.81619	0.00384441	0.0165998	0.00930203	4775	tags=54%, list=17%, signal=45%	HMOX1/NQO1/GDF15/LIF/JUN/PPP2CB/SLC35B3/MT1X/FAS/FDXR/DDIT3/UTP25/HSPA1B/CYP1B1/PSMD12
RASHI_RESPONSE_TO_IONIZING_RADIATION_6	65	0.5289	1.81484	0.00098401	0.00615761	0.00345055	2860	tags=31%, list=10%, signal=28%	S100A8/S100A9/SAA1/LAPTM5/ALDOC/BRIX1/FMNL1/IL18R1/EMP3/IL1R2/SELPLG/IFITM1/PIP4K2A/SUGT1/PSMB9/MRPL41/FAS/PTP4A3/SLFN12/RRP7A
OSWALD_HEMATOPOIETIC_STEM_CELL_IN_COLLAGEN_GEL_UP	208	0.446329	1.81481	0.0002886	0.00296587	0.00166199	4354	tags=38%, list=15%, signal=32%	CDKN1A/AKR1C1/AKR1C3/CXCL8/SOD2/BIRC3/FBN1/FERMT2/PLK2/AREG/CCN3/IL1A/IL1B/ZC3H12A/C3AR1/TNFAIP6/ICAM1/TIMM17A/CXCL1/PDE4B/ATF3/CD83/CXCL2/SRRM1/F3/FOS/CXCL3/TNFAIP3/PTGS2/IER2/IL1R2/DUSP2/PTX3/YRDC/IER5/DUSP1/FOSB/JUN/ARMC8/SERPINB2/IER3/GCLC/GRAP2/ODF2/SLCO2B1/FUS/SF3A3/RGS2/GGCX/GCFC2/RHOBTB3/LAS1L/PHF14/PTGER4/ARL4A/TIPIN/IL12A/CD14/PSMD11/DNAJC8/CHD3/ZFP36L1/SSB/EHD1/GPS2/GADD45B/LUC7L3/RCC1…
REN_ALVEOLAR_RHABDOMYOSARCOMA_DN	403	0.417708	1.81463	0.000338868	0.00296587	0.00166199	2838	tags=30%, list=10%, signal=28%	IGFBP3/COL8A1/C1S/SERPINE2/ITGA5/LOX/LGALS3BP/PAPSS2/FBN1/MFGE8/TIMP2/UGDH/TGFBI/P4HA1/SMTN/NQO1/GLRX/SLC25A32/KDELR3/QSOX1/P3H1/PLOD1/PAM/FN1/EPHX1/FAP/PDGFC/FBLN5/CCND1/TWIST1/FGF2/ARF4/TM4SF1/UAP1/DOK1/AP2M1/FKBP11/PGRMC1/OSTM1/PLAU/CBR1/CHPF2/FSTL1/CASP4/ATP6AP2/BDNF/ACSL4/NRP1/COQ10B/VKORC1/VAMP3/WLS/PLEKHB2/SLC39A14/LOXL2/CALU/TMEM45A/PRAF2/PLAUR/YKT6/TPST1/P4HB/RAB31/PTX3/ELOVL5/RRBP1/TPBG…
TAKEDA_TARGETS_OF_NUP98_HOXA9_FUSION_10D_UP	172	0.456152	1.81412	0.000280741	0.00296587	0.00166199	1739	tags=24%, list=6%, signal=23%	SERPINE2/ZEB1/IFI44L/IFI44/LGALS3BP/CDKN1C/CFI/FERMT2/IFIT3/HS3ST3B1/EGLN3/IFI6/GBP1/TNFAIP6/IFIT1/FN1/DBN1/SAMD9L/ZNF711/LSP1/TM4SF1/IFIT2/TRIM9/ADSSL1/DLC1/PTGS2/DUSP4/BATF3/GEM/SP110/TMEM45A/IFI27/BEND6/STAT1/ZNF503/ADGRA2/OASL/APOL6/NXPE3/ISG15/IFITM1/CFD
REACTOME_PEPTIDE_LIGAND_BINDING_RECEPTORS	113	0.481713	1.81269	0.00025974	0.00296587	0.00166199	2057	tags=19%, list=7%, signal=18%	C3/SAA1/CXCL8/PPBP/F2RL2/C5AR2/C3AR1/EDN2/ACKR1/CXCL1/FPR1/PSAP/CXCL2/CCL20/F2R/CXCL3/ECE1/QRFPR/APLN/CXCR5/HEBP1/RXFP1
GRAESSMANN_RESPONSE_TO_MC_AND_SERUM_DEPRIVATION_UP	195	0.448769	1.81246	0.000281611	0.00296587	0.00166199	3502	tags=33%, list=12%, signal=29%	C3/CFB/IFI44/LGALS3BP/SOD2/IFIT3/APOL2/HSD11B1/NMNAT1/PRSS23/SP140/IFIT2/ENC1/PATZ1/IFI35/DLC1/FSTL1/EGF/SP110/GBP3/CAPN6/TRIB2/CCN5/TAP2/UBA7/TOR3A/ABI3BP/MEPCE/SOCS1/BGN/STAT1/ZNF503/PSMB10/IRS1/CSF1/RECK/NNMT/IRF9/SEPT6/ISG15/RFXANK/TMEM167A/GTF3C6/CXCR5/TRIM21/HHAT/SELENOP/VDAC1/HIPK2/CASP7/FAS/BST2/SLFN12/NCK1/LIPA/EBNA1BP2/HELZ2/FJX1/PFDN5/PES1/DDX60/BCR/OSR1/TUBB4B/OSGIN2
PAPASPYRIDONOS_UNSTABLE_ATEROSCLEROTIC_PLAQUE_UP	47	0.563956	1.81186	0.00142925	0.00820546	0.00459811	3102	tags=47%, list=11%, signal=42%	SRGN/SLC39A8/PAPSS2/SOD2/IFIT3/SAMSN1/SAT1/CXCL2/SEL1L3/PLEKHB2/SLC17A5/NCKAP1L/RBMS1/CTSB/MLEC/BAZ1A/GRN/IFI30/ATP2B1/IDH1/TDP2/GALE
MOSERLE_IFNA_RESPONSE	30	0.614159	1.81171	0.00362565	0.0158493	0.00888148	3329	tags=50%, list=12%, signal=44%	IFI44L/IFI44/IFIT3/GBP1/IFIT1/SAMD9L/IFIT2/TRIM22/STAT1/OASL/IFITM1/EPSTI1/DDX60/DDX60L/USP18
PID_HIF1_TFPATHWAY	63	0.529949	1.81016	0.00145914	0.00830326	0.00465291	2185	tags=30%, list=8%, signal=28%	HMOX1/CA9/TFRC/BNIP3/EGLN3/HIF1A/VEGFA/FOS/HK2/PGK1/PGM1/PFKFB3/ENO1/PKM/JUN/LDHA/HK1/ALDOA/ENG
BORCZUK_MALIGNANT_MESOTHELIOMA_UP	307	0.427727	1.80968	0.000322789	0.00296587	0.00166199	4886	tags=40%, list=17%, signal=33%	RIT1/P4HA1/QSOX1/DNAJA1/DBN1/MAPRE1/HSPA8/DENND5A/UROS/STIP1/ZWINT/PGRMC1/F2R/PNO1/FADS1/SSR1/NCBP2/PPP1R2/PGK1/BLMH/VAMP3/ISG20L2/KIF5B/LOXL2/MAGED1/CALU/TAF12/CDKN2C/KPNA2/GRB2/CCT2/YKT6/PYCR1/TRIAP1/STK17A/PKM/RARS/PTGES3/SAP30/LINC00869/BUB3/DKC1/CCT5/HSPA4/SERBP1/TMEM97/CKS2/SRSF3/EMG1/PPT1/RAP1B/GTF2A2/TPX2/PSMD10/OSMR/ELOC/SLC25A1/CCT3/VDAC1/CHTOP/SMNDC1/FLNA/RHOBTB3/VBP1/UBE2S/MSMO1/PLD3/…
PETROVA_PROX1_TARGETS_DN	54	0.546451	1.80845	0.00168027	0.00921438	0.00516347	1559	tags=35%, list=5%, signal=33%	SRGN/CDH2/ITGA5/IL32/NRCAM/FAP/ANXA6/CD59/SRPX/TRIM22/PLAU/NRP1/EMP3/SLC38A6/BMP6/PRNP/ARL6IP5/PROCR/NNMT
HOLLMANN_APOPTOSIS_VIA_CD40_DN	253	0.434854	1.80691	0.000303398	0.00296587	0.00166199	4874	tags=39%, list=17%, signal=32%	VIM/LGALS3BP/HIST1H2AC/PON2/UGDH/NXN/C8orf33/SP140/SERPINH1/UBE2L6/MGAT2/PDE4B/DENND5A/SLC16A3/GNPDA1/DECR1/UROS/TIMM22/TRIM22/TRIP6/CASP4/FADS1/PSMB8/TOR1AIP1/CASP1/ZNF274/LRIF1/PGM1/HLA-B/AKIP1/CCNB1IP1/DECR2/TAP2/ACOT2/RRBP1/BAG3/TMX1/STAT1/E2F6/GSDMD/HIST1H1C/RWDD2B/PSPH/TRIM13/IFITM1/ACOT13/DENND2D/NOSIP/CPOX/MSRB2/BDH2/PSMB9/PNMA1/TARS/ABHD10/BABAM2/SUCLG2/MT1X/ANKMY2/NEK3/SLC39A4/CASP7/ST3…
REACTOME_HSP90_CHAPERONE_CYCLE_FOR_STEROID_HORMONE_RECEPTORS_SHR	55	0.543536	1.80625	0.0016835	0.00921559	0.00516415	4787	tags=45%, list=17%, signal=38%	TUBAL3/DNAJA1/HSPA8/AR/STIP1/CAPZA1/PTGES3/DCTN6/DYNLL1/DCTN1/HSPA1A/TUBA1C/ACTR10/DYNC1LI1/DNAJA2/HSP90AA1/HSP90AB1/TUBB3/TUBB4B/TUBB2A/TUBA8/TUBB6/HSPA1B/TUBB2B/PGR
SERVITJA_LIVER_HNF1A_TARGETS_UP	124	0.473996	1.80603	0.00026295	0.00296587	0.00166199	4396	tags=36%, list=15%, signal=31%	PTGFR/CDKN1C/SLC22A5/PSAT1/NQO1/AKR1B10/ME1/AFP/ABCC3/GALK1/GPRC5B/ENC1/CBR1/NPNT/CDC20/ARHGAP18/ACOT2/RAB30/RAB27A/SEPT6/LY6D/SLC25A4/MAP4K4/TMEM181/RGS2/TPX2/ADAMTS4/ABCD2/HTRA3/TMEM98/KIF2C/FGFRL1/SERPINB1/PPARG/TNFRSF12A/POR/SLPI/RGS16/GADD45B/IGF2BP3/CCNB1/ADAMTS5/SLC20A1/UBE2C/GSTT2B
REACTOME_RNA_POLYMERASE_I_TRANSCRIPTION_INITIATION	47	0.561253	1.80317	0.00166746	0.00920441	0.00515789	5046	tags=57%, list=18%, signal=47%	POLR1E/TWISTNB/CCNH/TAF1A/GTF2H2/CD3EAP/ERCC2/POLR1C/UBTF/EHMT2/HDAC1/RRN3/TAF1D/POLR2K/TAF1B/ZNRD1/TTF1/POLR1B/CHD3/POLR2L/KAT2B/POLR2H/POLR2F/GTF2H5/MBD3/GTF2H1/POLR2E
REACTOME_UCH_PROTEINASES	97	0.49023	1.80187	0.000512426	0.00377836	0.00211729	5167	tags=45%, list=18%, signal=37%	HIST1H2AC/HIST2H2AA4/PSMB8/PSMC5/PSME3/TGFBR2/PSMB10/PSMA6/PSMC4/PSMB9/PSMD10/USP15/PSME2/PSMA5/ADRM1/PSMD7/UCHL5/INO80C/PSMD13/PSMB5/TFPT/PSMD11/RUVBL1/ACTR8/PSME1/PSMA2/PSMA1/PSMC3/NEDD8/RPS27A/PSMD2/INO80E/ACTB/UBC/PSMD4/PSMC2/PSMB6/PSMA7/PSMD12/PSMD14/PSMB4/UBA52/PSMB3/PSMA3
WINTER_HYPOXIA_UP	95	0.490448	1.79845	0.000512295	0.00377836	0.00211729	4317	tags=47%, list=15%, signal=40%	CA9/CXCL8/P4HA1/BNIP3/PVR/GAPDH/VEGFA/LDLR/PGF/PLAU/EIF2S1/ANGPTL4/PGK1/TPD52L2/BMS1/SNX24/TPBG/LDHA/ALDOA/ADORA2B/HAUS2/CA12/GEMIN2/RUVBL2/GSS/TIMM23/MRPS17/PGAM1/TPI1/NME1/EEF1AKMT4/RHOC/SLCO1B3/MTX1/NTMT1/HOMER1/TUBB4B/MRGBP/RAN/NUDT15/PSMD2/SLIRP/ANKRD37/SLC16A1/MRPL14
KEGG_PORPHYRIN_AND_CHLOROPHYLL_METABOLISM	32	0.602984	1.79771	0.00433592	0.0182252	0.0102129	3538	tags=41%, list=12%, signal=36%	HMOX1/FTH1/UROS/ALAS1/HCCS/CPOX/HMBS/MMAB/EARS2/EPRS/UROD/BLVRB/COX15
ICHIBA_GRAFT_VERSUS_HOST_DISEASE_D7_UP	86	0.497796	1.79664	0.00127	0.00750233	0.00420409	2730	tags=37%, list=10%, signal=34%	LGALS3BP/SERPINA3/IFIT3/C8orf33/ICAM1/FLOT1/FKBP11/IFI35/PSMB8/CYBA/IL18R1/GBP3/COL4A1/TAP2/UBA7/RPS6KC1/PROCR/TMSB4X/MAK16/PKM/SOCS1/STAT1/PSMB10/ISG15/PSMB9/PTPN1/PSME2/NAMPT/FAS/PLD3/PTGS1/CD14
REACTOME_FORMATION_OF_TC_NER_PRE_INCISION_COMPLEX	53	0.543863	1.79303	0.00215414	0.0110413	0.00618724	5720	tags=57%, list=20%, signal=45%	COPS8/CCNH/GTF2H2/ERCC2/ERCC8/COPS7A/PPIE/POLR2G/POLR2K/POLR2C/POLR2L/COPS6/POLR2I/ISY1/RPS27A/POLR2D/UBC/POLR2H/CUL4A/POLR2F/GTF2H5/RBX1/COPS5/POLR2B/GTF2H1/HMGN1/POLR2E/UBA52/PRPF19/ZNF830
ACEVEDO_LIVER_TUMOR_VS_NORMAL_ADJACENT_TISSUE_DN	254	0.431083	1.7927	0.000302939	0.00296587	0.00166199	3141	tags=25%, list=11%, signal=22%	C3/IGFBP3/ATOH8/CDH2/ANPEP/PVR/DGAT2/ACOX3/DCUN1D3/ASB1/CCND1/RAB3IL1/MT1F/RGL1/EZR/SERPINA5/MFSD2A/ATF5/TRIP6/FOS/ERLIN1/RDH11/EIF2S1/SYNJ2BP/VNN1/RCN1/VKORC1/LYRM1/FGL1/PMPCA/PRNP/MINDY3/FOSB/BGN/IER3/CHMP7/NOCT/EPHA2/C1RL/DUSP5/SLC22A1/RGS2/SHBG/NRDE2/MT1X/C19orf66/RBM25/CERS4/MACROD1/ECHS1/ZBTB48/HMGCL/TNFRSF21/CCAR1/PDSS2/PPIG/SYMPK/DLST/ADRA1B/PIEZO1/PGGHG/ZNF593/TERF2IP
REACTOME_GLYCOSAMINOGLYCAN_METABOLISM	116	0.47473	1.7923	0.000261643	0.00296587	0.00166199	2878	tags=30%, list=10%, signal=27%	DCN/CHSY3/SDC3/PAPSS2/HAS2/CHST2/GPC6/HS3ST3B1/CSPG5/DSEL/HEXA/GALNS/SLC26A2/ST3GAL3/ST3GAL2/CHPF2/SDC2/GPC1/HS3ST3A1/SLC35B2/OMD/B3GAT3/BGN/CHST1/HYAL2/B4GALT7/HS6ST2/B3GNT2/SLC35B3/HEXB/HS3ST2/B4GALT6/XYLT2/BCAN/AGRN
REACTOME_TRANSPORT_OF_MATURE_TRANSCRIPT_TO_CYTOPLASM	81	0.501768	1.79138	0.000758917	0.00508159	0.00284758	5820	tags=42%, list=20%, signal=33%	SRSF7/SRRM1/NCBP2/EIF4E/SEH1L/SRSF3/FIP1L1/NUP54/THOC2/NUP62/NXT1/CHTOP/THOC1/RBM8A/MAGOHB/SYMPK/NUP35/UPF3B/NUP43/U2AF1L4/ALYREF/SRSF2/U2AF2/DDX39A/EIF4A3/NUP93/SRSF9/SARNP/SRSF11/SRSF6/DHX38/NUP98/NXF1/NUP205
KEGG_HUNTINGTONS_DISEASE	173	0.450151	1.79095	0.00028177	0.00296587	0.00166199	5658	tags=49%, list=20%, signal=40%	SOD2/TGM2/DLG4/CASP8/PLCB4/AP2M1/BDNF/BAX/ITPR1/VDAC2/CREB5/CLTCL1/PLCB2/CYCS/ATP5PD/DCTN1/ATP5F1B/CREB3/AP2A1/SLC25A4/CLTA/COX7A2L/HDAC1/NDUFB5/ATP5F1E/ATP5MC2/VDAC1/CYC1/VDAC3/NDUFA8/ATP5MC1/TFAM/PPARG/POLR2G/POLR2K/AP2S1/UQCR11/POLR2C/PPID/NDUFA9/PLCB3/NDUFV3/NDUFA6/POLR2L/POLR2I/ATP5PO/SDHA/ATP5F1D/ATP5PB/NDUFB2/POLR2D/NDUFS3/COX7A2/NDUFA10/ATP5F1C/NDUFB9/POLR2H/ATP5MC3/NDUFB3/POLR2F/NDUFB1/U…
ZHANG_PROLIFERATING_VS_QUIESCENT	49	0.551617	1.78903	0.00167184	0.00920441	0.00515789	2971	tags=43%, list=10%, signal=38%	CDH2/ITGA5/CXCL8/GADD45A/MDM2/CCND1/CXCL2/CASP4/BAX/ITGB3/PLAUR/GRB2/JUN/DYNLL1/ITGB1/ELOC/MAP3K11/HSP90AA1/CCN2/GNAS/TEK
CHNG_MULTIPLE_MYELOMA_HYPERPLOID_UP	51	0.546814	1.78901	0.00214695	0.0110361	0.0061843	8783	tags=73%, list=31%, signal=50%	NCBP2/UBA7/EIF3J/CLTA/EIF3G/MRPL34/EEF1B2/EEF1G/RPL24/RPL35A/RPLP1/IMP3/RPS3/RPL13A/UBA52/RPS19/SNRNP70/RPS23/RPS9/RPSA/RPS6/RPL27A/RPS17/RSL24D1/EIF4A2/RPLP2/RPL32/RPS13/RPL36/RPL21/RPL7A/RPS16/EIF3K/RPL18/DHPS/RPL4/RPS14
REACTOME_DOWNSTREAM_SIGNALING_EVENTS_OF_B_CELL_RECEPTOR_BCR	78	0.505183	1.78867	0.00126358	0.00747885	0.00419093	7048	tags=59%, list=25%, signal=45%	IKBKG/PSMB8/PSMC5/PSME3/PSMB10/PSMA6/MAP3K7/PSMC4/PSMB9/PSMD10/PSME2/PSMA5/PSMD7/PSMD13/PSMB5/PSMD11/PSME1/PSMA2/FKBP1A/PSMA1/PSMC3/RPS27A/PSMD2/SKP1/UBC/PSMD4/PSMC2/PSMB6/PSMA7/PSMD12/PSMD14/PSMB4/UBA52/PSMB3/PSMA3/PSMC6/PSMB7/NFKBIE/NFKBIB/PSMB1/CHUK/PSMB2/RELA/NFKBIA/PSMD1/SEM1
FERREIRA_EWINGS_SARCOMA_UNSTABLE_VS_STABLE_UP	152	0.456832	1.78734	0.00027465	0.00296587	0.00166199	5275	tags=43%, list=19%, signal=35%	DNTTIP2/NOP58/SDCBP/MRPL42/ZWINT/CCT6A/CASP4/ZNF330/SGO2/ESF1/ERCC1/NCKAP1L/FGFR1OP2/KPNA2/C4orf3/INF2/PINX1/SAP30/BRD9/FEN1/ODF2/CTPS1/PAG1/DAP3/TPX2/ADAMTS3/STX1A/PSTPIP1/NAMPT/LMNB1/MRPL20/KIF2C/CEP83/GPAT4/CENPK/SPCS3/DSCC1/AKAP5/NDUFA9/EAF1/PRPF40A/MTERF1/HOMER1/RGS16/WDHD1/H2AFZ/TOP2A/RAN/SNRPA1/FAM126A/C5orf30/PARPBP/UBE2T/PCLAF/CCNB1/POLR2F/ERH/RPS26/NDC80/GMNN/SNRPD1/DBF4/SPC25/PSIP1/MRP…
LINDGREN_BLADDER_CANCER_CLUSTER_2B	356	0.415333	1.78525	0.000331236	0.00296587	0.00166199	2838	tags=28%, list=10%, signal=25%	SRGN/C1S/PROS1/CCDC80/SDC3/SERPINA3/C1R/LAPTM5/IL7R/ADGRE5/PCDH7/ALOX5AP/MAFB/BIRC3/PAPPA/TIMP2/GPC6/CCN3/PDGFRL/IL1A/ANPEP/IL32/IL27RA/C3AR1/NFIL3/CNRIP1/SAMSN1/ICAM1/LIX1L/SVEP1/CLIC2/ACTA2/ANXA6/LIG4/TNC/IFITM2/RUNX2/IFITM3/SRPX/RGL1/ADAMTS9/NR2F1/TNFAIP3/SOCS3/GNG11/GEM/SSR1/PPP1R18/RGS5/TENT5C/EMP3/DNAJB9/SOX18/IER2/PIM2/PLAUR/YKT6/TPST1/DNAJB5/ABI3BP/GLIPR2/SON/JUN/PREX1/NR4A1/NNMT/ETV1/EVI…
REACTOME_SIGNALING_BY_NOTCH4	81	0.499956	1.78491	0.000758917	0.00508159	0.00284758	5167	tags=51%, list=18%, signal=42%	ACTA2/PSMB8/PSMC5/PSME3/TACC3/PSMB10/PSMA6/PSMC4/PSMB9/PSMD10/PSME2/PSMA5/PSMD7/PSMD13/PSMB5/PSMD11/PSME1/NCSTN/PSMA2/PSMA1/HEY2/PSMC3/HES1/KAT2B/RPS27A/PSMD2/SKP1/MAMLD1/UBC/PSMD4/RBX1/PSMC2/PSMB6/PSMA7/PSMD12/PSMD14/SNW1/PSMB4/UBA52/PSMB3/PSMA3
LEE_LIVER_CANCER_E2F1_DN	50	0.548348	1.78398	0.00167504	0.00920441	0.00515789	2770	tags=26%, list=10%, signal=24%	CFH/KYNU/AKR1C1/HSD11B1/ME1/ITPR1/NR1H3/CFHR1/ELOVL5/TDO2/ACSL1/GSTO1/MARC1
REACTOME_ASSEMBLY_OF_THE_PRE_REPLICATIVE_COMPLEX	66	0.51814	1.78359	0.00147529	0.00835997	0.00468469	6503	tags=64%, list=23%, signal=49%	E2F3/MCM8/PSMB8/PSMC5/PSME3/PSMB10/PSMA6/PSMC4/PSMB9/PSMD10/PSME2/PSMA5/PSMD7/PSMD13/PSMB5/PSMD11/PSME1/PSMA2/PSMA1/PSMC3/RPS27A/PSMD2/ORC6/UBC/PSMD4/PSMC2/ORC2/PSMB6/PSMA7/PSMD12/PSMD14/GMNN/PSMB4/UBA52/PSMB3/PSMA3/PSMC6/PSMB7/ORC5/PSMB1/CDC6/PSMB2
LANDIS_ERBB2_BREAST_TUMORS_324_DN	141	0.460485	1.78326	0.00027027	0.00296587	0.00166199	3287	tags=31%, list=12%, signal=28%	ZEB1/CCDC80/PAPSS2/GBE1/TGFBI/ACTA2/CES1/GPAM/GPX3/MOCS2/SRPX/DECR1/FSTL1/LAMB1/FADS1/NKIRAS1/NRP1/MAN1A1/COL4A1/PGM1/NR1H3/ALAS1/YWHAG/FEZ2/CHCHD10/S100A6/HTRA1/GAS6/THBD/CYB5A/CYB5B/ACSL1/MARCKS/MMP3/IDH1/MYL9/TMEM205/PDHA1/BCKDHB/DNAJC8/CAVIN2/GSTZ1/TSC22D1/ETFB
TOMIDA_METASTASIS_UP	25	0.632614	1.78226	0.00488889	0.0198672	0.011133	5062	tags=64%, list=18%, signal=53%	DNER/SLC16A9/CXCL1/TMSB4X/CKAP4/IER3/ECH1/GNAS/HSP90AB1/MRPS22/METAP2/PSMD2/TUBB/ALG3/GNAI2/SNRPF
REACTOME_MRNA_SPLICING_MINOR_PATHWAY	52	0.541344	1.78167	0.0023753	0.0118523	0.00664171	6305	tags=56%, list=22%, signal=44%	SRSF7/SF3B4/NCBP2/PRPF6/SF3B3/SNRNP40/DDX23/POLR2G/POLR2K/POLR2C/ZMAT5/SNRPE/SRSF2/POLR2L/POLR2I/POLR2D/POLR2H/TXNL4A/POLR2F/SRSF6/SF3B2/POLR2B/SNRPD1/POLR2E/SNRNP25/SNRPF/YBX1/SF3B5/LSM2
HOSHIDA_LIVER_CANCER_SUBCLASS_S3	245	0.430566	1.78143	0.000303674	0.00296587	0.00166199	3097	tags=25%, list=11%, signal=23%	CFB/CFH/C1S/PROS1/AKR1C1/MME/SERPINA3/C1R/PAPSS2/PTGR1/SOD2/IL32/IMPA1/TMOD1/IFIT1/EPHX1/CES1/ANXA6/FOXO1/GPX3/CTSO/CXCL2/ALDH1B1/SELENBP1/DECR1/ACO1/PGRMC1/CBR1/GCHFR/SLCO2A1/RIDA/PGM1/ALAS1/TPMT/ASS1/TDO2/TOB1/PTS/LONP1/NNMT/FAH/ISG15/PLA2G2A/PON3/SELENOP/QDPR/CYB5A/C4A/ACSL1/MSMO1/IQGAP2/FXR2/ECHS1/GSTO1/CSTB/CD14/TGFBR3/SBDS/ACOX2/GSTA2/CYP2J2/GSTZ1
SENESE_HDAC3_TARGETS_UP	479	0.40356	1.7802	0.000365364	0.00301754	0.00169094	3733	tags=29%, list=13%, signal=26%	SERPINE2/KYNU/AKR1C1/LOX/SAA1/SQSTM1/IL7R/AKR1C3/CXCL8/CDKN1C/ASPH/HAS2/SOD2/BIRC3/SLC7A11/PAPPA/PMAIP1/IFIT3/DCBLD1/NMRAL2P/SNHG16/IL32/TFRC/AKR1B10/ADGRL3/ADAM12/IFIT1/FN1/FLOT1/SAT1/PDGFC/ESM1/GFPT2/PDE4B/SRPX/TM4SF1/EZR/ATF3/CCDC88A/CCL20/IFIT2/ENC1/CHRNA9/STIP1/DUS3L/PLAU/KHDRBS3/CXCL3/TNFAIP3/GEM/MAN1A1/STK10/TMEM173/VAMP3/NFKB2/PLEKHB2/ITGB3/TNFRSF10B/BCL2L1/TOP1/CEP170/HMGA2/PTX3/SLC25A15…
PID_IL12_2PATHWAY	51	0.543926	1.77956	0.00262405	0.0128473	0.00719928	4424	tags=37%, list=16%, signal=32%	IL1R1/IL1B/STAT4/FOS/B2M/IL18R1/NFKB2/RELB/SOCS1/STAT1/HLA-A/EOMES/SPHK2/IL12A/STAT3/GADD45B/NOS2/MTOR/STAT6
PELLICCIOTTA_HDAC_IN_ANTIGEN_PRESENTATION_UP	60	0.526924	1.77948	0.00145985	0.00830326	0.00465291	6392	tags=58%, list=22%, signal=45%	SAR1A/GOSR2/SEC22B/B2M/GOLM1/COPG1/COPB1/SIL1/POMP/PSMC4/PSMD10/COPG2/PSMA5/SAR1B/PSMD13/YIPF5/TRAPPC3/TMED9/SELENOS/DDIT3/TRAPPC4/PSMD2/TBCB/PSMD4/CALR/HSPA5/PSMB4/ERGIC3/PSMB3/WFS1/PPP1R15A/PSMB7/ASNS/YIPF1/PSMB1
BILANGES_RAPAMYCIN_SENSITIVE_VIA_TSC1_AND_TSC2	65	0.518082	1.77772	0.00123001	0.00735125	0.00411943	5708	tags=51%, list=20%, signal=41%	VIM/PSAT1/CRYZ/CCT2/ACOT2/AIMP1/TOMM20/BGN/POLR1C/TCP1/CCT4/SLC25A17/AC074143.1/VDAC1/PRDX3/PAICS/SSR4/EIF3E/BLVRB/TUBB2A/PPM1G/BCS1L/TUBB/IMPDH2/RPL35A/RPS26/ATP5F1A/SLC25A3/NAP1L1/UQCRFS1/RPS28/MRPL30/NSA2
SMID_BREAST_CANCER_NORMAL_LIKE_UP	389	0.41034	1.77639	0.000336587	0.00296587	0.00166199	1177	tags=14%, list=4%, signal=14%	C3/DCN/KRT14/CFH/SRGN/C1S/PROS1/ZEB1/MME/SAA1/C1R/IL7R/GGT5/CDKN1C/LHFPL6/NSG1/BIRC3/CFI/IL27RA/IL1R1/TMOD1/SP140/ACKR1/SVEP1/CLIC2/ACTA2/CES1/FBLN5/ABCA6/RIPOR2/ID1/SRPX/KRI1/CCDC88A/CXCL2/ST3GAL2/FMNL1/SYNM/SEL1L3/GMIP/BIN1/GNG11/GEM/CASP1/RGS5/STK10/IL18R1/SP110/IL1R2/BTN3A2/NCKAP1L/NLRP1/RBMS1/PLCB2/PRKCQ
RAMALHO_STEMNESS_UP	194	0.440175	1.77612	0.000282008	0.00296587	0.00166199	4203	tags=35%, list=15%, signal=30%	CDKN1A/TXNRD1/LSG1/NOP58/BYSL/CCND1/NIFK/GRWD1/RSL1D1/FKBP11/TRIP6/F2R/UMPS/GCLM/PPP1R2/RCN1/ESF1/TXNDC9/RIDA/C12orf45/GNL2/NDUFAF4/BLZF1/WDR55/PRPF6/MPHOSPH10/WDR43/EIF3J/SRSF3/MRPS10/RCL1/ZMAT3/RPUSD4/RPP14/RABGGTB/SUCLG2/ITGB1/RRN3/PAFAH2/LAS1L/COPS7A/FKBP9/GCAT/UTP4/CTTN/ADAM9/PSMD11/TGS1/GFER/MRPL34/NUP35/GARS/EPRS/ACAT2/MTERF3/MRPL17/INTS5/URI1/MPDU1/SNRPC/MRPS2/YWHAB/PPIC/UBE2T/XRCC5/FASTK…
VERHAAK_AML_WITH_NPM1_MUTATED_UP	163	0.450221	1.77608	0.000278862	0.00296587	0.00166199	2772	tags=30%, list=10%, signal=27%	CFB/HMOX1/SERPINA1/TRIM16/AKR1C1/LGALS3BP/MAFB/SOD2/PPBP/IL1B/C3AR1/SLC2A6/GDF15/TBXAS1/SAT1/LTBP1/FPR1/MVP/CXCL2/SLC16A3/CCL20/CXCL3/TNFAIP3/VNN1/CASP1/NFKB2/SCO2/ITGB3/PLAUR/PTX3/SERPINB2/AQP9/HIST1H1C/IER3/TYMP/S100A6/MCTP1/IFI30/BASP1/TLR4/SELENOP/SECTM1/HIST2H2BE/NAMPT/ACSL1/MARCKS/SMC4/CD14/HIST1H3H
DAZARD_RESPONSE_TO_UV_NHEK_UP	208	0.436537	1.775	0.0002886	0.00296587	0.00166199	3845	tags=39%, list=14%, signal=34%	KYNU/S100A9/CXCL8/CDKN1C/PMAIP1/BAMBI/PPBP/GADD45A/TAGLN/PAX8/CXCL1/MVP/TM4SF1/ATF3/CXCL2/IL1RL1/CCL20/XBP1/FOS/CXCL3/TNFAIP3/PTGS2/GEM/ZNF330/ITPR1/GCHFR/NCBP2/PHLDA2/CCDC85B/CYBA/PGK1/PPIF/ERCC1/IER2/TIMM44/GATC/YKT6/PHLDA1/NR1D1/GUK1/DUSP1/ERCC2/PKM/CDH16/TXN/NEU1/TOB1/JUN/IER3/DYNLL1/PDLIM5/TYMP/TOM1/QPCT/EIF3G/NOL7/UBE2S/ECHS1/ACO2/CCN2/ATF4/STK17B/HBEGF/ODC1/H2AFX/RRP7A/TFE3/HSP90AB1/KRT34/…
CAMPS_COLON_CANCER_COPY_NUMBER_DN	51	0.542413	1.77461	0.00262405	0.0128473	0.00719928	4357	tags=37%, list=15%, signal=32%	NRXN3/TAF13/CES1P1/CES1/ZNF630/HIST2H4A/HLA-B/CFHR1/HIST2H3PS2/APOBEC3B/HIST2H2BE/BCAR3/ZDHHC14/HLA-C/NME7/TUT1/NANOG/EEF1G/TMEM167B
KYNG_RESPONSE_TO_H2O2_VIA_ERCC6_UP	38	0.572617	1.77387	0.00369089	0.0160885	0.00901553	1134	tags=26%, list=4%, signal=25%	ZEB1/SLC26A2/UROS/VARS/TRIP6/CAPZA1/PPP1R2/PABPC4/TOMM34/PHLDA1
BURTON_ADIPOGENESIS_7	46	0.553627	1.77333	0.0021398	0.0110361	0.0061843	1701	tags=33%, list=6%, signal=31%	SERPINE2/PROS1/FBN1/TIMP2/TGFBI/NQO1/CCND1/S1PR3/PNP/IFITM3/SSR3/TMEM45A/CCN5/SELENOF/S100A6
MONNIER_POSTRADIATION_TUMOR_ESCAPE_UP	385	0.409713	1.77249	0.000337838	0.00296587	0.00166199	3738	tags=29%, list=13%, signal=26%	AKR1B1/LHFPL6/ASPH/AEN/GSR/TFRC/NQO1/PDCD11/SLC25A32/PGD/TXNRD1/POP1/TRMT6/FTSJ3/ERGIC1/LTBP1/TANGO6/MAFG/GRWD1/IL1RL1/METTL1/DUS3L/PPAT/ZNF121/G6PD/CFAP45/GPC1/TSR1/UBXN8/GCLM/NOP56/PRPF4/SLC19A1/NOL8/NRP1/MAN1A1/PABPC4/IL18R1/PPIF/RUNDC1/C1orf109/FOSL1/PWP2/GEMIN5/CCNB1IP1/TRMT61A/BMS1/RASSF1/ASS1/MLEC/HSPA4/NEMF/LONP1/OASL/GCLC/PRR3/NNMT/LBHD1/MYBBP1A/MAP3K7/PNN/RPAP1/ASRGL1/ZMAT3/TSPAN5/GTF3C…
REACTOME_SRP_DEPENDENT_COTRANSLATIONAL_PROTEIN_TARGETING_TO_MEMBRANE	110	0.472512	1.77063	0.000259	0.00296587	0.00166199	8783	tags=69%, list=31%, signal=48%	SSR3/RPS27L/SSR1/SRP19/SEC61A1/SRPRB/SRP72/SPCS3/SSR2/SSR4/RPS12/RPL9/SEC61G/RPS27A/SRPRA/SPCS2/RPS10/RPS20/RPL24/RPL35A/RPLP1/RPL17/RPL8/RPS26/SEC11A/SEC61B/RPS3/RPL13A/FAU/UBA52/RPS3A/SPCS1/RPS19/SRP9/RPL26L1/RPS28/RPS23/RPL38/RPL41/RPS9/RPSA/RPS6/SRP14/RPL31/RPS2/RPL27A/RPL5/RPS24/RPS17/RPL34/RPL36AL/RPS25/RPL11/RPS21/RPS29/RPS5/RPL13/RPLP2/RPLP0/RPL22/RPL32/RPS13/RPN2/RPL36/RPL21/RPL7A/RPL23A…
MORI_SMALL_PRE_BII_LYMPHOCYTE_DN	69	0.509758	1.77012	0.00172754	0.00938948	0.0052616	4333	tags=43%, list=15%, signal=37%	CDKN1A/S100A9/STAT4/PSMB8/SLC25A20/VKORC1/GBP3/IER2/EIF4E/PDK1/ISOC1/SEC61A1/PIP4K2A/HSPH1/HMBS/ZYX/DDX1/LCP1/SMC4/BRPF1/EHD1/WDHD1/TUBB4B/IFRD2/NASP/MOGS/PTPN22/SLC20A1/SET/ANP32B
AMIT_EGF_RESPONSE_480_MCF10A	43	0.557922	1.76913	0.00329025	0.0148717	0.00833369	2799	tags=37%, list=10%, signal=34%	STC1/PMAIP1/SMTN/HPCAL1/SH2D2A/CYP27B1/VEGFA/PHLDA2/SLC35G2/POPDC3/MRM2/TRIB3/TIMM10/VEGFC/NAV3/ODC1
GENTILE_UV_LOW_DOSE_UP	25	0.627893	1.76896	0.00577778	0.0227936	0.0127729	1664	tags=40%, list=6%, signal=38%	CDKN1A/PMAIP1/PLK2/GDF15/CCDC86/RSL1D1/TOB1/SMOX/HSPA1A/ISG15
REACTOME_RNA_POLYMERASE_II_TRANSCRIPTION_PRE_INITIATION_AND_PROMOTER_OPENING	46	0.552222	1.76884	0.0021398	0.0110361	0.0061843	5046	tags=52%, list=18%, signal=43%	TAF13/TAF7/CCNH/TAF12/GTF2H2/ERCC2/TAF9/GTF2E2/GTF2A2/TAF3/TAF11/POLR2G/POLR2K/POLR2C/POLR2L/POLR2I/POLR2D/POLR2H/POLR2F/GTF2H5/GTF2B/POLR2B/GTF2H1/POLR2E
REACTOME_NUCLEOTIDE_EXCISION_REPAIR	110	0.471979	1.76863	0.000259	0.00296587	0.00166199	5894	tags=44%, list=21%, signal=35%	COPS8/UBE2V2/CCNH/POLE3/ERCC1/GTF2H2/PARP2/ERCC2/ERCC8/SUMO3/COPS7A/PPIE/INO80C/TFPT/RUVBL1/POLR2G/ACTR8/POLR2K/POLR2C/POLE4/RFC3/POLR2L/COPS6/POLR2I/ISY1/RPS27A/INO80E/ACTB/POLR2D/POLD2/UBC/POLR2H/CUL4A/POLR2F/GTF2H5/RBX1/COPS5/POLD1/POLR2B/CHD1L/GTF2H1/HMGN1/POLR2E/UBA52/PRPF19/SUMO2/ZNF830/UBE2N
DAUER_STAT3_TARGETS_UP	47	0.550409	1.76833	0.00214388	0.0110361	0.0061843	1854	tags=30%, list=7%, signal=28%	C3/SOD2/ICAM1/GFPT2/ATF3/LDLR/EFNB2/SOCS3/PLIN3/FOSL1/PFKFB3/CTSB/JUN/DUSP5
REACTOME_TRANSCRIPTION_OF_THE_HIV_GENOME	68	0.51053	1.76684	0.00172414	0.00938765	0.00526057	5599	tags=46%, list=20%, signal=37%	TAF13/TAF7/ELOA/CCNH/NCBP2/TAF12/GTF2H2/ERCC2/SUPT5H/TAF9/GTF2E2/GTF2A2/TAF3/ELOC/TAF11/POLR2G/POLR2K/POLR2C/POLR2L/SUPT16H/POLR2I/POLR2D/POLR2H/POLR2F/GTF2H5/GTF2B/POLR2B/GTF2H1/POLR2E/ELOB/NELFE
SENESE_HDAC2_TARGETS_UP	115	0.468068	1.76596	0.000781657	0.00517721	0.00290116	2458	tags=25%, list=9%, signal=23%	KYNU/SAA1/IL7R/CXCL8/ASPH/TGM2/IL1A/SNHG16/TFRC/ZC3H12A/TIMM17A/GFPT2/DUS3L/PLAU/TNFAIP3/MLX/PAX8-AS1/SLC39A14/TNFRSF10B/HMGA2/TGFBR2/ANTXR2/RBPMS2/TAF3/OSMR/TNFRSF11B/CDV3/NAMPT/RBM14
REACTOME_CELLULAR_RESPONSES_TO_STRESS	419	0.405273	1.76588	0.000346861	0.00296587	0.00166199	4793	tags=36%, list=17%, signal=30%	CBX6/CDKN1A/CA9/CXCL8/SOD2/HIST1H2AC/IL1A/TUBAL3/GSR/EGLN3/TXNRD1/SERPINH1/DNAJA1/MDM2/BAG2/RPS6KA2/GPX3/HIF1A/HSPA8/DNAJC2/HIST1H2BK/ID1/AR/NCF2/E2F3/VEGFA/HIST2H2AA4/ASF1A/STIP1/HIST1H3G/FOS/HIST1H2BG/PSMB8/GPX8/PSMC5/CAPZA1/HIST1H2BD/CYBA/HIST2H4A/PSME3/CDKN2C/P4HB/HMGA2/PRDX1/SEH1L/HSPA13/TXN/PTGES3/BAG3/AKT1S1/JUN/CYCS/ANAPC7/PSMB10/DCTN6/HSPA4/HIST1H1C/EED/DYNLL1/VCP/DCTN1/HSPA1A/PSMA6/TUBA…
MOREAUX_MULTIPLE_MYELOMA_BY_TACI_DN	175	0.443178	1.76585	0.000281532	0.00296587	0.00166199	5524	tags=45%, list=19%, signal=36%	ASF1A/PAK1IP1/NCLN/SGO2/NOL8/ERCC1/GEMIN5/CCT2/LAP3/TYMS/MINDY3/RIOX2/AIMP2/BUB3/DKC1/CCT5/NUDT5/UPF3A/DDX31/PSMC4/MBD4/DDX1/MRPL50/EIF3G/RUVBL2/RNF7/TIMM50/MINPP1/ZNF131/TMEM126A/KEAP1/SMARCA4/UTP4/MRPS12/TMA16/OTUD6B/SPATA5L1/CHMP4A/EBNA1BP2/THYN1/TDP2/G3BP1/MATR3/BTBD1/SSBP1/C1orf131/ABHD3/WDR61/CDK1/TMEM267/RAN/NDUFA13/PAAF1/TATDN1/NASP/TBCB/HIKESHI/SLC16A1/NMT1/EIF3M/EMC4/MALSU1/PRKDC/CYP2R1…
SASAI_RESISTANCE_TO_NEOPLASTIC_TRANSFROMATION	49	0.544256	1.76516	0.00214951	0.0110361	0.0061843	2667	tags=39%, list=9%, signal=35%	PLOD2/FBN1/VLDLR/QSOX1/P3H1/TAGLN/FBLN5/IL1RL1/FSTL1/SDC2/ADAMTS1/CDKN2C/CCN5/BGN/TNFRSF1A/TNFRSF11B/SELENOP/ST3GAL5/CCN2
REACTOME_CHONDROITIN_SULFATE_DERMATAN_SULFATE_METABOLISM	49	0.544045	1.76447	0.00214951	0.0110361	0.0061843	4397	tags=47%, list=15%, signal=40%	DCN/CHSY3/SDC3/GPC6/CSPG5/DSEL/HEXA/CHPF2/SDC2/GPC1/B3GAT3/BGN/B4GALT7/HEXB/XYLT2/BCAN/AGRN/GPC2/CHST7/ARSB/CHST14/HYAL3/IDUA
GERHOLD_ADIPOGENESIS_UP	47	0.549034	1.76391	0.00214388	0.0110361	0.0061843	4876	tags=47%, list=17%, signal=39%	SQSTM1/VLDLR/GADD45A/FABP5/VEGFA/GCLM/STAT1/LDHA/CFD/ACSL1/PDHA1/PPARG/AGT/DDIT3/CIDEC/STAT3/CEBPB/VEGFB/PMP22/LDHB/MCL1/ACADVL
RIGGINS_TAMOXIFEN_RESISTANCE_UP	59	0.523352	1.76286	0.00145349	0.0082979	0.00464991	2838	tags=32%, list=10%, signal=29%	IGFBP3/SERPINA1/STARD8/SRPX/ALDH3B1/CTSA/SLCO2A1/WDR45B/GALNT6/TMEM45A/FGFR4/SPRY4/HIST1H1C/SEC61A1/PTP4A1/C4A/ST3GAL5/TGFBR3/MSN
BHAT_ESR1_TARGETS_VIA_AKT1_UP	266	0.421922	1.76272	0.00030553	0.00296587	0.00166199	3899	tags=39%, list=14%, signal=34%	OSGIN1/LRG1/MED24/SLC22A5/SYBU/TGM2/IFRD1/SCNN1B/C5AR2/MAT2A/UNC5A/HPCAL1/SH2D2A/GPATCH4/POP1/GDF15/NIP7/SLC25A25/CCND1/TSKU/TOE1/QSOX2/ATF3/ALDH3B1/MFSD2A/XBP1/NOL6/FOS/MTFP1/EIF2S1/NEIL2/PPRC1/AATF/GLA/TMEM120B/STC2/TENT5C/HK2/KCNK15/PTRH2/PPIF/ISG20L2/TMEM104/TWNK/MAPT/DUSP2/FLAD1/TRMT61A/CERS1/GNL2/SNX24/IMP4/TPBG/PAM16/CYP4F11/IER3/NUDC/BRD9/PIP4K2A/MYBBP1A/RCL1/IGFBP4/SLC6A6/PODXL/UBIAD1/RP…
REACTOME_FCERI_MEDIATED_NF_KB_ACTIVATION	80	0.495301	1.76252	0.00177485	0.00956168	0.00535809	7048	tags=59%, list=25%, signal=44%	IKBKG/PSMB8/PSMC5/PSME3/PRKCQ/PSMB10/PSMA6/MAP3K7/PSMC4/PSMB9/PSMD10/PSME2/PSMA5/PSMD7/PSMD13/PSMB5/PSMD11/PSME1/PSMA2/PSMA1/PSMC3/LYN/RPS27A/PSMD2/SKP1/UBC/PSMD4/PSMC2/PSMB6/PSMA7/UBE2V1/PSMD12/PSMD14/PSMB4/UBA52/PSMB3/PSMA3/UBE2N/PSMC6/PSMB7/PSMB1/CHUK/PSMB2/RELA/NFKBIA/PSMD1/SEM1
REACTOME_REGULATION_OF_RAS_BY_GAPS	65	0.513645	1.7625	0.00196802	0.0104009	0.00582839	5167	tags=55%, list=18%, signal=45%	RASA3/PSMB8/PSMC5/PSME3/PSMB10/PSMA6/SPRED3/PSMC4/SPRED1/PSMB9/PSMD10/PSME2/PSMA5/PSMD7/PSMD13/PSMB5/PSMD11/PSME1/PSMA2/PSMA1/PSMC3/CUL3/RPS27A/PSMD2/UBC/PSMD4/RBX1/PSMC2/PSMB6/PSMA7/PSMD12/PSMD14/PSMB4/UBA52/PSMB3/PSMA3
REACTOME_CELLULAR_RESPONSE_TO_HYPOXIA	73	0.502281	1.76159	0.00199005	0.0104812	0.00587334	5339	tags=55%, list=19%, signal=45%	CA9/EGLN3/HIF1A/VEGFA/PSMB8/PSMC5/PSME3/PSMB10/PSMA6/PSMC4/PSMB9/PSMD10/ELOC/PSME2/PSMA5/PSMD7/PSMD13/PSMB5/PSMD11/PSME1/PSMA2/PSMA1/HIF3A/PSMC3/RPS27A/PSMD2/UBC/PSMD4/RBX1/PSMC2/EGLN2/PSMB6/PSMA7/PSMD12/PSMD14/PSMB4/UBA52/PSMB3/PSMA3/ELOB
SEKI_INFLAMMATORY_RESPONSE_LPS_UP	68	0.508857	1.76106	0.00221675	0.0112866	0.00632469	2417	tags=28%, list=8%, signal=26%	SERPINA3/SOD2/BIRC3/PLK2/SLCO4A1/ZC3H12A/ICAM1/TNIP1/CEMIP2/TNFAIP3/GBP3/LIF/NFKB2/FOSL1/CSF1/IER3/OSMR/JDP2/FAS
DUTTA_APOPTOSIS_VIA_NFKB	31	0.59409	1.76085	0.00524396	0.0210856	0.0118158	3637	tags=52%, list=13%, signal=45%	SOD2/BIRC3/BNIP3/AFP/MDM2/CASP8/TNFAIP3/BAX/TNFRSF10B/BCL2L1/TNFRSF10A/IER3/FAS/TNFRSF21/TRAF2/GADD45B
KOBAYASHI_EGFR_SIGNALING_24HR_DN	252	0.423797	1.7605	0.000302939	0.00296587	0.00166199	5008	tags=42%, list=18%, signal=35%	STC1/TNFRSF6B/FAM216A/AREG/SLCO4A1/PSAT1/ENO2/CCND1/PIMREG/AURKA/FABP5/SRSF7/NOC3L/GTSE1/ZWINT/DUSP4/NOP56/PHLDA2/RRP15/CDC20/PPIF/SHCBP1/FOSL1/PARP2/KPNA2/HMGA2/TYMS/PSMC3IP/CCND3/PRPS1/IER3/OASL/CKS2/ETV1/HELLS/SLC43A3/PBK/PNN/FEN1/POLR3K/ADORA2B/CTPS1/DUSP5/HSPA14/NOLC1/TPX2/SPHK1/SRM/GINS3/DCBLD2/PA2G4/UBE2S/LMNB1/PRC1/TGFA/WWTR1/KIF2C/TIPIN/SMC4/CMC2/PAICS/NME1/ODC1/H2AFX/ACOX2/ABCE1/TNFRSF1…
REACTOME_FORMATION_OF_TUBULIN_FOLDING_INTERMEDIATES_BY_CCT_TRIC	25	0.624656	1.75984	0.00644444	0.0247739	0.0138826	4552	tags=64%, list=16%, signal=54%	TUBAL3/CCT6A/CCT2/CCT5/TUBA1C/TCP1/CCT4/CCT3/CCT8/CCT7/TUBB3/TUBB4B/TUBB2A/TUBA8/TUBB6/TUBB2B
BYSTRYKH_HEMATOPOIESIS_STEM_CELL_AND_BRAIN_QTL_CIS	62	0.516951	1.7595	0.00194363	0.0103435	0.00579621	5433	tags=45%, list=19%, signal=37%	ELOA/ALDH9A1/ARHGAP9/GEMIN5/TRMT1/EEF1AKMT1/DDA1/HARS/DCTN6/PRKCE/AC055839.2/MRPL35/CUX1/DAP3/ARL6IP1/GFER/SNRPB2/SKP1/NOP10/MRPL44/MRPS7/ACAA1/PSMB6/THUMPD1/DPP7/NECAP2/MTIF2/SRP9
LEE_AGING_NEOCORTEX_UP	66	0.511141	1.75949	0.00196705	0.0104009	0.00582839	4381	tags=38%, list=15%, signal=32%	VIM/LGALS3BP/ALDOC/P4HA1/PSAT1/GADD45A/SAT1/VEGFA/FOS/B2M/LAMB1/PPP1R2/NR4A1/SEC23B/C4A/PTGS1/CSNK1D/PHB/MYL12A/DDIT3/CTSZ/TUBB/UBC/SET/IFI27L2
ZHU_CMV_ALL_UP	105	0.472402	1.75801	0.000518807	0.0037889	0.00212319	3870	tags=47%, list=14%, signal=40%	IL7R/IFI6/IMPA1/GBP1/FGFR1/DNAJA1/PML/LIG4/ENO2/SAR1A/PNP/SRSF7/ATF5/STIP1/TRIM22/TNFAIP3/PTGS2/PSMB8/SP100/SSR1/GRPEL1/EIF4E/SLC39A14/ALAS1/ENO1/IFI27/NR4A1/HSPA1A/PSMA6/ISG15/IFITM1/TRIM21/GGCX/EIF5/RIPK1/PFKP/MLLT11/EIF4A1/NAMPT/UBE2S/POLR2K/PSMA2/NR4A3/HSPE1/SNRPB2/SNRPA1/NUP93/TUBB2A/PSMD2
SHAFFER_IRF4_TARGETS_IN_PLASMA_CELL_VS_MATURE_B_LYMPHOCYTE	65	0.512217	1.7576	0.00196802	0.0104009	0.00582839	2957	tags=42%, list=10%, signal=37%	TIMP2/NFIL3/PAM/ATF3/UAP1/VEGFA/SLAMF7/LDLR/FKBP11/TNFAIP3/SSR1/PABPC4/ITPKA/DNAJB9/PIM2/PDK1/BMP6/DNAJB5/NR4A1/TXNDC5/SPATS2/DUSP5/APOBEC3B/NAMPT/SUB1/ATF4/TNFRSF12A
MARKEY_RB1_CHRONIC_LOF_DN	102	0.474359	1.75723	0.000774194	0.00514315	0.00288207	2730	tags=23%, list=10%, signal=20%	IGFBP3/DCN/HMOX1/SRGN/NPR3/SQSTM1/COLGALT1/PON2/C3AR1/CD59/RPS6KA2/GNG11/ATP6V0B/DCTN6/HTRA1/HM13/PARM1/TFPI/PSTPIP1/MLLT11/PLD3/ZDHHC14/CD14
TIEN_INTESTINE_PROBIOTICS_6HR_UP	52	0.53391	1.7572	0.00261283	0.0128335	0.00719151	6842	tags=52%, list=24%, signal=40%	FTL/HSPA8/GAPDH/ALDH3B1/SEL1L3/B2M/CRCP/PGK1/PRNP/RPL9P7/HSPA1A/EIF5A/ACTB/UBC/EEF1G/RPS3A/RPS19/NAP1L1/RPS23/RPL41/RPS6/RPS2/RPL27A/RPL5/RPS24/RPS17/UGT1A10
REACTOME_REGULATION_OF_EXPRESSION_OF_SLITS_AND_ROBOS	166	0.444124	1.75521	0.000279408	0.00296587	0.00166199	7823	tags=63%, list=27%, signal=46%	RPS27L/PSMB8/PSMC5/NCBP2/UPF2/PSME3/PSMB10/UPF3A/PSMA6/PSMC4/PSMB9/PSMD10/ELOC/PSME2/PSMA5/ISL1/PSMD7/RBM8A/PSMD13/PSMB5/PSMD11/MAGOHB/UPF3B/PSME1/PSMA2/PSMA1/RPS12/PSMC3/ROBO1/EIF4A3/RPL9/ETF1/RPS27A/PSMD2/RPS10/RPS20/UBC/EIF4G1/PSMD4/RBX1/PSMC2/RPL24/RPL35A/RPLP1/PSMB6/RPL17/PSMA7/RPL8/RPS26/PSMD12/PSMD14/RPS3/PSMB4/RPL13A/FAU/UBA52/RPS3A/PSMB3/PSMA3/RPS19/ELOB/SLIT2/RPL26L1/RPS28/RPS23/RPL38/R…
REACTOME_EPIGENETIC_REGULATION_OF_GENE_EXPRESSION	138	0.454242	1.75466	0.000538358	0.00392232	0.00219796	5175	tags=40%, list=18%, signal=33%	HIST1H2AC/POLR1E/HIST1H2BK/HIST2H2AA4/HIST1H3G/DDX21/HIST1H2BG/TWISTNB/CCNH/TDG/TAF1A/HIST1H2BD/HIST2H4A/GTF2H2/CD3EAP/ERCC2/SAP30/POLR1C/EED/UBTF/MYBBP1A/EHMT2/HDAC1/HIST1H2BN/HIST2H2BE/TAF1D/HIST1H3H/H2AFX/POLR2K/TAF1B/ZNRD1/TTF1/PHF1/POLR1B/CHD3/HIST1H2BJ/SAP18/H2AFZ/POLR2L/KAT2B/RRP8/ACTB/SAP30BP/SUV39H1/POLR2H/HIST1H2BC/SMARCA5/POLR2F/GTF2H5/CBX3/PHF19/MBD3/GTF2H1/POLR2E/HIST1H4A
MILI_PSEUDOPODIA	47	0.545706	1.75322	0.00238209	0.0118523	0.00664171	3547	tags=34%, list=12%, signal=30%	ZEB1/MAP1B/C1orf216/KIF5B/SH3BGRL/DKC1/RAB13/SEPT7/RFLNB/PALLD/CENPB/ANKRD11/MFF/SSB/EIF3E/COA5
LAU_APOPTOSIS_CDKN2A_UP	55	0.527433	1.75274	0.002886	0.0136705	0.00766058	2417	tags=31%, list=8%, signal=28%	CDKN1A/TNFSF9/TNFRSF10D/BNIP3/PDCD11/GADD45A/DAP/CASP8/TNFAIP3/CASP1/PTRH2/TNFRSF10B/BCL2L1/CYCS/DIABLO/FADD/FAS
THUM_SYSTOLIC_HEART_FAILURE_UP	385	0.404606	1.7504	0.000337838	0.00296587	0.00166199	3776	tags=28%, list=13%, signal=25%	IGFBP3/CFB/SRGN/C1S/SERPINE2/ZEB1/AKR1C1/S100A9/SDC3/LAPTM5/ALOX5AP/CFI/MFGE8/TGM2/PLK2/MAT2A/C3AR1/GADD45A/MYOM3/PDGFC/HTATIP2/TM4SF1/EZR/ST3GAL3/CXCL2/VEGFA/CMAHP/PGRMC1/DNAJB4/ATP6AP2/SDC2/GPX8/RBMS3/NCBP2/CASP1/MAN1A1/IWS1/VAMP3/BTN3A2/CALU/TMEM45A/PDK1/OMD/CCT2/LAP3/PRNP/HRH1/TMEM230/NR1D1/MINDY3/ENO1/CTSB/ERCC8/EPHA3/TGFBR2/STAT1/PRPS1/HSPA4/ZFP36L2/SEC61A1/OASL/TMEM35B/ETV1/EVI2B/FOPNL/C1o…
LIM_MAMMARY_LUMINAL_PROGENITOR_UP	52	0.531652	1.74977	0.00285036	0.013607	0.00762498	2730	tags=29%, list=10%, signal=26%	C3/S100A8/PDZK1IP1/GGT5/C10orf90/ANPEP/DAPP1/GNE/GALNT15/C1QTNF1/QPCT/SECTM1/HIVEP3/ACSL1/CD14
SMIRNOV_CIRCULATING_ENDOTHELIOCYTES_IN_CANCER_UP	152	0.44713	1.74938	0.00027465	0.00296587	0.00166199	2185	tags=27%, list=8%, signal=25%	IGFBP3/HMOX1/PROS1/CDKN1A/CXCL8/TIMP2/PPBP/TGFBI/SLCO4A1/WNT5A/ANPEP/CHN1/SLC22A4/C3AR1/PRSS23/QSOX1/INSIG1/FPR1/NCF2/MAFG/CLN8/VEGFA/CCL20/ADGRE2/PLAU/DUSP4/PFKFB3/CTSB/CIAO1/IL21R/TNFRSF1A/SERPINB2/AQP9/IER3/CHKA/RAB13/CREM/SPHK1/THBD/SCML1/ENG
HELLER_SILENCED_BY_METHYLATION_DN	101	0.472762	1.74914	0.00103013	0.00638098	0.00357572	3755	tags=37%, list=13%, signal=32%	HMOX1/OSGIN1/LAPTM5/SLC7A11/IFRD1/PSAT1/GDF15/MAP1B/SERPINH1/UFM1/RPS6KA2/ATF3/CBS/DNAJB4/CHAC1/DNAJB9/TIMM44/HSPA13/BAG3/TXNDC5/HSPA1A/HSPH1/MMP16/DDIT4/TRIB3/LSAMP/DDAH1/HSPA6/P2RX5/ATF4/IDH1/SLC47A1/AAK1/DDIT3/RGS16/EPB41L2/CEBPB
REACTOME_INTERLEUKIN_1_SIGNALING	99	0.47419	1.74727	0.000771605	0.00514315	0.00288207	7133	tags=63%, list=25%, signal=47%	SAA1/SQSTM1/IL1A/IL1R1/IL1B/IKBKG/PSMB8/NKIRAS1/PSMC5/PSME3/NFKB2/IL1R2/PSMB10/PSMA6/MAP3K7/PSMC4/PSMB9/PSMD10/PSME2/PSMA5/PSMD7/PSMD13/PSMB5/PSMD11/PSME1/PSMA2/TNIP2/PSMA1/IRAK2/PSMC3/RPS27A/PSMD2/SKP1/UBC/PSMD4/RBX1/PSMC2/PSMB6/PSMA7/UBE2V1/PSMD12/PSMD14/PSMB4/UBA52/PSMB3/PSMA3/MYD88/MAP2K1/IL1RAP/UBE2N/PSMC6/PSMB7/NFKBIB/PSMB1/CHUK/PSMB2/RELA/APP/NFKBIA/PSMD1/SEM1/S100A12
SENGUPTA_NASOPHARYNGEAL_CARCINOMA_WITH_LMP1_DN	148	0.44823	1.74668	0.000272183	0.00296587	0.00166199	1559	tags=18%, list=5%, signal=17%	CFB/DNER/KRT14/SERPINA1/S100A8/SUSD2/PROS1/PDZK1IP1/S100A9/SERPINA3/DCBLD1/MSLN/ANPEP/NQO1/COL27A1/MFAP5/MAP1B/RNF128/CMAHP/IL13RA2/ZG16B/ABI3BP/ASS1/ALPK2/ST8SIA1/NNMT
GROSS_HYPOXIA_VIA_ELK3_ONLY_UP	29	0.596545	1.74519	0.00747283	0.0273527	0.0153277	4147	tags=48%, list=15%, signal=41%	SLC7A11/EGLN3/NFIL3/GADD45A/PGM1/HERPUD1/PDLIM5/THBD/LCP1/ATF4/EPRS/SLPI/CEBPB/SLC20A1
WHITFIELD_CELL_CYCLE_M_G1	129	0.456249	1.7441	0.00080171	0.00527577	0.00295639	5093	tags=42%, list=18%, signal=35%	PLK2/SNHG16/GDF15/IFIT1/TCERG1/CCND1/HIF1A/HSPA8/IFIT2/PAK1IP1/PLIN3/AMD1/LRIF1/GRPEL1/TICAM2/TOP1/ANP32E/LYAR/ZNFX1/DCTN6/DKC1/DYNLL1/TAF9/SRSF3/PBK/AOC2/FOPNL/ODF2/SNUPN/ANTXR1/CTR9/HIST2H2BE/TOB2/C4A/PRC1/AOC3/G3BP1/ZNF593/TSC22D1/RAB3A/RHEB/RAN/MRPS2/NFIA/DCP1A/PPP2CA/CWC15/LARP7/CBX3/USB1/LARP1/RPL13A/ZCCHC10/ZFAS1
REACTOME_FORMATION_OF_THE_EARLY_ELONGATION_COMPLEX	33	0.579186	1.74315	0.00688863	0.0258641	0.0144935	5599	tags=55%, list=20%, signal=44%	CCNH/NCBP2/GTF2H2/ERCC2/SUPT5H/POLR2G/POLR2K/POLR2C/POLR2L/POLR2I/POLR2D/POLR2H/POLR2F/GTF2H5/POLR2B/GTF2H1/POLR2E/NELFE
MORI_PLASMA_CELL_UP	51	0.532606	1.74252	0.0028626	0.0136237	0.00763436	5177	tags=47%, list=18%, signal=39%	SGPP2/MGAT2/HTATIP2/TENT5C/DNAJB9/RRBP1/CTSB/HSPA13/CCDC47/BPGM/BHLHA15/SLC30A7/NBAS/SSR2/TESC/SURF4/CHRNB4/M6PR/OSTC/TMEM248/NANS/MANF/QPCTL/SPCS1
REACTOME_ARACHIDONIC_ACID_METABOLISM	54	0.526494	1.7424	0.0031205	0.0144241	0.00808283	1777	tags=22%, list=6%, signal=21%	ALOX15B/GGT5/AKR1C3/ALOX5AP/PTGR1/PON2/TBXAS1/CBR1/PTGS2/PTGES3/CYP4F11/PON3
ALFANO_MYC_TARGETS	225	0.424261	1.74218	0.0002936	0.00296587	0.00166199	5072	tags=42%, list=18%, signal=35%	ZEB1/MME/STC1/CDKN1C/TIMP2/TGM2/FAM216A/SMTN/PDCD11/QSOX1/MAP1B/FLOT1/CD59/LTBP1/SDCBP/MVP/PNP/TACC2/RSL1D1/GNPDA1/PPAT/DDX21/TRIP6/PLAU/FARSA/NOP56/AATF/DNAJC11/BLMH/PPIF/MMP17/DUSP2/PLAUR/PHLDA1/PYCR1/MGLL/IMP4/COPB1/DESI1/HERPUD1/VCP/KARS/GAS6/RRP12/ARL6IP1/QDPR/MMADHC/EIF2B1/RER1/SURF2/PEX5/MARCKS/WBP1L/MDN1/PAICS/CELSR3/ABCF2/MYL12A/RUVBL1/TUFM/AGRN/E2F5/DLST/EBNA1BP2/PES1/UBE2K/MYL6/SLPI/EH…
REACTOME_INTERFERON_ALPHA_BETA_SIGNALING	55	0.523654	1.74018	0.002886	0.0136705	0.00766058	3329	tags=45%, list=12%, signal=40%	IFIT3/IFI6/IFIT1/IFITM2/IFITM3/IFIT2/IFI35/SOCS3/PSMB8/HLA-B/IFI27/SOCS1/STAT1/HLA-A/OASL/IRF9/ISG15/IFITM1/PTPN1/BST2/HLA-H/ABCE1/IRF3/HLA-C/USP18
CHIBA_RESPONSE_TO_TSA	44	0.547727	1.73908	0.00427046	0.0179995	0.0100864	2667	tags=39%, list=9%, signal=35%	CDKN1A/SQSTM1/TGM2/TXNRD1/IFITM3/ATP6AP2/ANAPC13/NIPSNAP1/PRDX1/DUSP1/PKM/STAT1/ZBED3/GRN/PRPF3/LYPLA2/CCN2
BEIER_GLIOMA_STEM_CELL_DN	60	0.514777	1.73845	0.00170316	0.00928998	0.00520584	3937	tags=37%, list=14%, signal=32%	IGFBP3/LAPTM5/TIMP2/FTH1/DUSP3/CCND1/CUEDC1/DDAH2/MGLL/RIOX2/PCNX4/NXPE3/ECD/BASP1/CACNA1A/GLTP/COMMD1/HBEGF/MORN4/SNX21/YWHAB/RNF112
LIAN_LIPA_TARGETS_6M	56	0.521053	1.73819	0.0026538	0.0129472	0.00725524	1612	tags=23%, list=6%, signal=22%	HMOX1/S100A9/SAA1/MMP19/MAFB/PAPPA/C3AR1/GDF15/SNX6/IL1R2/CTSB/NEU1/RP1
REACTOME_FORMATION_OF_HIV_ELONGATION_COMPLEX_IN_THE_ABSENCE_OF_HIV_TAT	44	0.547237	1.73753	0.00427046	0.0179995	0.0100864	5599	tags=50%, list=20%, signal=40%	ELOA/CCNH/NCBP2/GTF2H2/ERCC2/SUPT5H/ELOC/POLR2G/POLR2K/POLR2C/POLR2L/SUPT16H/POLR2I/POLR2D/POLR2H/POLR2F/GTF2H5/POLR2B/GTF2H1/POLR2E/ELOB/NELFE
REACTOME_DISORDERS_OF_TRANSMEMBRANE_TRANSPORTERS	161	0.441153	1.73688	0.000277778	0.00296587	0.00166199	5396	tags=38%, list=19%, signal=31%	ABCC2/SLC22A5/SLC26A2/ERLIN1/PSMB8/SLC22A18/PSMC5/SLCO2A1/SLC35C1/PSME3/SLC17A5/SEH1L/PSMB10/VCP/PSMA6/HK1/PSMC4/PSMB9/SLC5A2/NUP54/PSMD10/NUP62/SLC39A4/PSME2/PSMA5/PSMD7/PSMD13/PSMB5/ERLEC1/PSMD11/SLCO1B3/NUP35/PSME1/NUP43/SLC3A1/PSMA2/PSMA1/PSMC3/NUP93/SLC12A1/RPS27A/PSMD2/SLC16A1/UBC/PSMD4/SLC24A5/PSMC2/PSMB6/PSMA7/PSMD12/PSMD14/SLC24A1/PSMB4/DERL2/SLC35A2/UBA52/PSMB3/PSMA3/SLC33A1/NUP98/BSG
HOLLERN_EMT_BREAST_TUMOR_UP	127	0.45512	1.73665	0.000797872	0.0052732	0.00295495	3979	tags=36%, list=14%, signal=31%	DCN/VIM/ZEB1/ITGA5/TIMP2/AOX1/PVR/P3H1/FN1/IKBIP/DBN1/LSP1/DOK1/ST3GAL2/NR2F1/SNX6/LAMB1/IL18R1/EMP3/CALU/ARL6IP5/PLA2G15/TGFBR2/ADGRA2/CSF1/AC080038.1/IGFBP4/NAAA/RAP1B/HTRA3/JDP2/SEMA7A/VEGFC/FKBP9/PLAT/STK17B/SACS/NRP2/OSR1/POFUT2/TSPAN4/PLXND1/EPB41L2/ANKRD1/GLIPR1/EHBP1L1
ELVIDGE_HYPOXIA_DN	144	0.447392	1.73603	0.00081367	0.00534298	0.00299405	4156	tags=39%, list=15%, signal=33%	TIGAR/AOX1/CCDC86/DNAJA1/NIP7/STIP1/OSTM1/PNO1/NCLN/AMD1/SLC35C1/RRP15/CDC20/PPIF/PSME3/QRSL1/FLAD1/GAS2L1/PUS1/TOR3A/CCND3/EXOSC4/HSPA4/OGDH/CHKA/RNASEH1/POLR3K/CTPS1/HSPH1/FUS/SUMO3/SLC52A2/TMEM33/SRM/CDV3/SOBP/TIMM23/URB2/SNRNP40/MRPS12/ABCF2/ODC1/BAK1/TMEM259/SLC5A6/C2CD2/EIF5A/ASPSCR1/WDR77/SDF2L1/KPNA4/LARS2/ETF1/SRPRA/FASTKD5/CENPN
MOOTHA_PGC	410	0.398904	1.73526	0.000340948	0.00296587	0.00166199	5251	tags=44%, list=18%, signal=36%	SOD2/IFRD1/F2RL2/TFRC/GLRX/AKR1B10/PRSS23/GDF15/ME1/SAT1/TIMM17A/GAPDH/BNIP3L/VEGFA/TIMM10B/DFFA/FOS/MTHFD2/JMJD6/SLC25A20/NSF/NRP1/PGK1/GRPEL1/DNAJB9/PSME3/PGM1/TIMM8A/GTPBP4/TIMM44/TMEM45A/ALAS1/TBL1X/PHLDA1/DNAJA3/RAB31/HCCS/PUS1/TRIAP1/GUK1/DUSP1/ENO1/PKM/CIAO1/ST6GALNAC4/ESRRA/FAM162A/NFS1/HSPD1/TMX2/CYCS/ABCF1/PSMB10/TTC1/LDHA/LONP1/CKS2/CHMP7/TYMP/PSMA6/FAM214B/ACOT13/ATP6V1D/ACYP2/P4HA2/S…
REACTOME_IRON_UPTAKE_AND_TRANSPORT	56	0.519746	1.73383	0.0026538	0.0129472	0.00725524	4342	tags=34%, list=15%, signal=29%	HMOX1/FTL/TFRC/FTH1/ATP6V0A4/ACO1/ATP6V1E1/ATP6V0B/FBXL5/ATP6V1D/ATP6V0E1/ATP6V1A/HFE/NEDD8/RPS27A/SKP1/TCIRG1/UBC/ATP6V0C
WANG_LMO4_TARGETS_DN	350	0.403361	1.73369	0.000326371	0.00296587	0.00166199	5147	tags=40%, list=18%, signal=33%	PAPSS2/TIGAR/GPATCH4/GADD45A/PAM/DUSP3/KCNQ3/ACTA2/FBLIM1/SAR1A/IFITM3/AURKA/SPRYD7/PSAP/OSTM1/SNX6/SIPA1L2/B2M/RDH11/TDG/DAPP1/PSMC5/EIF3A/AATF/THUMPD3/PLRG1/PLEKHB2/HLA-B/CCDC58/C9orf85/C12orf45/NSUN4/TOP1/RPF1/CCDC137/ZNFX1/BAG3/RPL7L1/TYW5/ZC3H7A/JUN/TMEM192/AIMP2/CHURC1/ZFAND2A/RBM26/ZNF622/LIN7A/DKC1/SPART/TMEM199/HIST1H1C/PTS/FEZ2/DIABLO/PRMT5/C16orf72/IRF9/PHF11/SUGT1/LYRM2/FUT8/SRA1/DTX3…
HUANG_DASATINIB_RESISTANCE_UP	80	0.48659	1.73152	0.00177485	0.00956168	0.00535809	2838	tags=42%, list=10%, signal=38%	ITGA5/AKR1C3/PCDH7/DPYD/IFIT3/TGFBI/SAMD9L/IL15RA/PDGFC/F3/PLAU/FSTL1/PSMB8/PPP1R18/GBP3/PGM1/BTN3A2/PRNP/TGFBR2/FXYD5/NNMT/ANTXR2/EPHA2/POPDC3/COTL1/PSMB9/ZYX/OSMR/TFPI/DCBLD2/MAP7D1/BTN3A3/TNFRSF21/MSN
HELLER_SILENCED_BY_METHYLATION_UP	238	0.419664	1.73089	0.00030349	0.00296587	0.00166199	1767	tags=23%, list=6%, signal=21%	IGFBP3/CFB/KYNU/CDKN1A/IFI44L/IFI44/MAFB/BIRC3/FBN1/PMAIP1/IFIT3/IL32/NQO1/MUC1/GBP1/SAMSN1/TNFAIP6/IFIT1/ICAM1/PML/S100A4/SAT1/LSP1/ID1/NCF2/AURKA/DENND5A/SLAMF7/LDLR/TRIM22/TRIP6/SOCS3/HIST1H2BG/DAPP1/PHLDA2/CDC20/WLS/IL1R2/DDAH2/IQSEC3/MIR22HG/IFI27/SOCS1/TNFRSF9/STAT1/ST8SIA1/IER3/IRF9/OLFML2B/HSPA1A/ISG15/IFITM1/S100A6/IGFBP4
REACTOME_MRNA_CAPPING	29	0.591061	1.72915	0.00883152	0.0308612	0.0172937	5046	tags=59%, list=18%, signal=48%	CCNH/NCBP2/GTF2H2/ERCC2/SUPT5H/POLR2G/POLR2K/POLR2C/POLR2L/POLR2I/POLR2D/POLR2H/POLR2F/GTF2H5/POLR2B/GTF2H1/POLR2E
REACTOME_HIV_INFECTION	225	0.420977	1.7287	0.0002936	0.00296587	0.00166199	6008	tags=46%, list=21%, signal=37%	TAF13/TAF7/LIG4/AP2M1/ELOA/B2M/PSMB8/CCNH/PSMC5/NCBP2/PSME3/TAF12/GTF2H2/ERCC2/SUPT5H/SEH1L/HLA-A/PSMB10/CHMP7/TAF9/PSMA6/FEN1/GTF2E2/PSMC4/PSMB9/AP2A1/SLC25A4/AP1S1/NUP54/GTF2A2/PSMD10/TAF3/NUP62/ELOC/PSME2/UBAP1/PSMA5/PSMD7/PSMD13/TAF11/PSMB5/AP1M1/PSMD11/CHMP4A/POLR2G/NUP35/POLR2K/PSME1/AP2S1/POLR2C/NUP43/PSMA2/PSMA1/PSMC3/CHMP3/POLR2L/RAN/BANF1/SUPT16H/POLR2I/NUP93/RCC1/VPS37A/RPS27A/PSMD2/SK…
WOO_LIVER_CANCER_RECURRENCE_UP	100	0.468354	1.72829	0.00103252	0.00638288	0.00357678	2667	tags=34%, list=9%, signal=31%	IGFBP3/LOX/CXCL8/ZEB2/HKDC1/FGFR1/QSOX1/DBN1/ENO2/CXCL1/E2F3/PLAU/DUSP4/GEM/HK2/ANOS1/ARHGEF2/PLAUR/TPBG/PKM/SOCS1/EPHA3/CCND3/MAPK12/S100A6/PPT1/ALDOA/RGS2/TPM2/PFKP/TSPAN3/FLNA/MARCKS/CCN2
PARK_APL_PATHOGENESIS_DN	44	0.544126	1.72765	0.00474496	0.0195682	0.0109654	2107	tags=36%, list=7%, signal=34%	SRGN/CXCL8/COL4A2/IL32/QSOX1/CES1/LSP1/PPP5C/RAB31/CKAP4/NEU1/SMOX/SERPINB2/RAB27A/IFI30/ZYX
REACTOME_METABOLISM_OF_NUCLEOTIDES	96	0.470574	1.72685	0.00153531	0.00863613	0.00483944	2895	tags=31%, list=10%, signal=28%	DPYD/GSR/GLRX/TXNRD1/PFAS/PNP/PPAT/ADSSL1/UMPS/NUDT9/NUDT16/AK6/TYMS/GUK1/TXN/RRM2B/NUDT5/TYMP/DHODH/ITPA/CTPS1/ADAL/ATIC/NT5C3A/AK2/ADSL/GMPR2/PAICS/NME1/NME3
NADLER_OBESITY_UP	53	0.523562	1.7261	0.00335089	0.0150292	0.00842196	4381	tags=42%, list=15%, signal=35%	LAPTM5/ALOX5AP/MFGE8/HCLS1/PSAP/CTSA/DUSP1/SELPLG/CTSB/BGN/PEA15/GRN/BASP1/FLNA/PLD3/CSTB/CTSZ/NEDD8/TLN1/POSTN/FCGR2A/IFI27L2
REACTOME_ASPARAGINE_N_LINKED_GLYCOSYLATION	294	0.4092	1.72564	0.000316957	0.00296587	0.00166199	5095	tags=36%, list=18%, signal=30%	SERPINA1/AREG/TUBAL3/KDELR3/CD59/GFPT2/ARF4/ALG1/MGAT2/UAP1/EDEM2/ST3GAL3/ST3GAL2/LMAN2L/GOSR2/SEC22B/CTSA/NUS1/CAPZA1/SLC35C1/NSF/COPG1/MAN1A1/SLC17A5/ALG2/GNE/YKT6/COPB1/MLEC/ST6GALNAC4/NEU1/SCFD1/SRD5A3/DCTN6/ST8SIA1/DYNLL1/TRIM13/VCP/DCTN1/TUBA1C/MGAT1/CMAS/FUT8/ACTR10/NEU3/MCFD2/BET1L/DHDDS/SEC16A/COPG2/B4GALT6/UGGT1/DYNC1LI1/ST3GAL5/SAR1B/TGFA/CSNK1D/NAPB/TRAPPC3/TMED9/MVD/MPI/PREB/ALG12/F8…
LEE_AGING_CEREBELLUM_DN	62	0.506865	1.72517	0.0026725	0.0129472	0.00725524	4082	tags=39%, list=14%, signal=33%	PTPRM/SERPINH1/TNC/CCND1/GALK1/CLIC3/FARSA/NFKB2/UBA7/NR1D1/DDX47/HSPA4/PISD/CREM/SNCA/CD320/SMARCA4/NPY1R/CARS/ANXA7/RAB4B-EGLN2/NOS2/MTOR/TUBA8
KEGG_ANTIGEN_PROCESSING_AND_PRESENTATION	52	0.524062	1.72479	0.00356295	0.0156889	0.00879162	4439	tags=40%, list=16%, signal=34%	HSPA8/B2M/PSME3/HLA-B/TAP2/CTSB/HLA-A/HSPA4/HSPA1A/RFXANK/IFI30/PSME2/HSPA6/HSP90AA1/HSP90AB1/PSME1/HLA-C/TAP1/CALR/HSPA5/HSPA1B
KEGG_SYSTEMIC_LUPUS_ERYTHEMATOSUS	100	0.467162	1.72389	0.00129066	0.00758043	0.00424786	867	tags=11%, list=3%, signal=11%	C3/C1S/C1R/HIST1H2AC/HIST2H2BF/HIST1H2BK/HIST2H2AA4/HIST1H3G/HIST1H2BG/HIST1H2BD/HIST2H4A
LY_AGING_OLD_DN	56	0.51676	1.72387	0.00289505	0.0136922	0.00767273	5934	tags=50%, list=21%, signal=40%	CXCL8/HAS2/PTGS2/CDC20/TYMS/FBN2/TGFBR2/SERPINB2/KIF2C/PSMD11/H2AFX/PSMA2/H2AFZ/CKS1B/DDX39A/HSD17B10/NASP/UGCG/POSTN/CCNB1/UBE2C/PSMC2/RANBP1/PSMD12/PSMA3/SAFB/HMGN2/PSMC6
REACTOME_DOWNSTREAM_TCR_SIGNALING	86	0.477486	1.72334	0.002286	0.0114675	0.00642606	7048	tags=58%, list=25%, signal=44%	IKBKG/PSMB8/PSMC5/PSME3/PRKCQ/PSMB10/PSMA6/MAP3K7/PSMC4/PSMB9/PSMD10/PSME2/PSMA5/PSMD7/PSMD13/PSMB5/PSMD11/PSME1/PSMA2/PSMA1/PSMC3/RPS27A/PSMD2/SKP1/UBC/PSMD4/PSMC2/PSMB6/PSMA7/UBE2V1/PSMD12/PSMD14/PIK3R2/PSMB4/UBA52/PSMB3/PSMA3/CD4/UBE2N/PSMC6/PSMB7/PTEN/PSMB1/CHUK/PSMB2/RELA/PIK3R1/NFKBIA/PSMD1/SEM1
REACTOME_INTERLEUKIN_12_FAMILY_SIGNALING	54	0.520653	1.72307	0.00336054	0.0150292	0.00842196	4592	tags=43%, list=16%, signal=36%	SOD2/IL27RA/STAT4/CAPZA1/P4HB/STAT1/SERPINB2/TCP1/RAP1B/TALDO1/LCP1/PSME2/LMNB1/GSTO1/IL12A/MSN/GSTA2/AIP/STAT3/SNRPA1/IL6ST/EBI3/HNRNPF
REACTOME_SYNTHESIS_OF_SUBSTRATES_IN_N_GLYCAN_BIOSYTHESIS	59	0.511485	1.72289	0.00339147	0.0151061	0.00846504	5752	tags=56%, list=20%, signal=45%	GFPT2/UAP1/ST3GAL3/ST3GAL2/CTSA/NUS1/SLC35C1/SLC17A5/GNE/ST6GALNAC4/NEU1/SRD5A3/ST8SIA1/CMAS/NEU3/DHDDS/ST3GAL5/MVD/MPI/ST6GALNAC3/ST6GALNAC1/AMDHD2/GMPPA/GNPNAT1/ALG5/NANS/ST3GAL1/DPM2/TSTA3/PGM3/DOLPP1/GMPPB/FUOM
KIM_MYC_AMPLIFICATION_TARGETS_UP	192	0.427513	1.72165	0.00028177	0.00296587	0.00166199	3361	tags=38%, list=12%, signal=34%	AKR1B1/ALOX5AP/FAM216A/CNTN1/PCOLCE2/CHN1/GPATCH4/NIP7/KCNQ3/ABCC3/NIFK/PFAS/PNP/PGRMC1/PPAT/DDX21/RPS27L/LAMB1/FAM155B/NOP56/RRP9/BLMH/LYRM1/DRG1/DLEU1/MRPS23/ARL6IP5/ENO1/MAK16/RIOX2/LTF/LYAR/NOB1/HSPD1/CYCS/DKC1/PRPS1/C1QTNF1/TMEM38B/EIF3J/WDR3/ATP5F1B/POLR3K/KARS/RABEPK/PVT1/DAP3/CA12/TRMT10C/GATD3A/FASTKD1/MRPL50/NEK3/EGFLAM/PRRG1/UTP4/TIPIN/PAICS/FAM89A/NME1/ODC1/PRDX6/MIR17HG/PDHA1/PRMT6/E…
TING_SILENCED_BY_DICER	29	0.588179	1.72072	0.00951087	0.0324451	0.0181813	931	tags=24%, list=3%, signal=23%	RTN1/VIM/SERPINA1/LHFPL6/ICAM1/TM4SF1/GBP3
NAKAMURA_ADIPOGENESIS_EARLY_DN	35	0.564562	1.71859	0.00824931	0.0293864	0.0164673	1220	tags=23%, list=4%, signal=22%	IGFBP3/SERPINE2/LOX/PRSS23/GDF15/IER2/PDE6D/ABI3BP
KEGG_AMINOACYL_TRNA_BIOSYNTHESIS	41	0.54718	1.71821	0.00536131	0.0214733	0.012033	4302	tags=46%, list=15%, signal=39%	VARS/FARSA/MARS2/RARS/AARS/HARS/HARS2/KARS/TARS/NARS/EARS2/SARS2/GARS/EPRS/AARS2/CARS/LARS2/FARS2/LARS
KORKOLA_YOLK_SAC_TUMOR	57	0.513102	1.71775	0.00314999	0.0144947	0.00812241	2282	tags=26%, list=8%, signal=24%	DCN/SRGN/CDH2/C1S/C1R/PCDH7/HAS2/TRIM22/HMGA2/NMI/MOK/SHISA2/PRTG/CYP26A1/EOMES
GROSS_HYPOXIA_VIA_ELK3_AND_HIF1A_UP	139	0.444249	1.71742	0.0013488	0.00787658	0.00441381	2951	tags=33%, list=10%, signal=30%	SRGN/GBE1/TNFRSF10D/PLK2/P4HA1/BNIP3/SAT1/TNC/ENO2/TM4SF1/ATF3/VEGFA/SELENBP1/PGF/FOS/DNAJB4/DUSP4/ZNF330/JMJD6/PPRC1/SLC19A1/ANGPTL4/HK2/PGK1/MAGED1/PDK1/PHLDA1/PFKFB3/RPS6KC1/ARL6IP5/RARS/FAM162A/SPRY4/AIMP2/SMOX/FAM49B/NOCT/PSMC4/PTGER4/PGAM1/TPI1/CCN2/PPP1R3B/HBEGF/NAGPA/PALLD
KEGG_PURINE_METABOLISM	152	0.438808	1.71682	0.0005493	0.00399253	0.0022373	5284	tags=45%, list=19%, signal=37%	PDE3B/PAPSS2/PDE7B/POLR3G/POLR1E/PDE4B/PFAS/PNP/POLR3GL/PPAT/ADSSL1/NUDT9/POLE3/PDE6A/PDE6D/GUK1/PKM/RRM2B/POLR1C/PRPS1/NUDT5/POLR3K/ITPA/POLR3H/NME1-NME2/ATIC/NT5C3A/PNPT1/AK2/ADSL/GUCY1B1/GMPR2/POLR3A/PAICS/NME1/ENPP1/POLR3F/FHIT/NME3/POLR2G/POLR2K/ZNRD1/POLR2C/NME7/POLR1B/PDE10A/NME4/POLE4/POLR2L/POLR2I/GUCY2C/NPR1/POLR3D/POLR2D/POLD2/POLR2H/IMPDH2/POLR2F/GUCY1A2/PKLR/NUDT2/POLD1/POLR2B/APRT/P…
REACTOME_KERATAN_SULFATE_KERATIN_METABOLISM	32	0.57563	1.71615	0.0073026	0.0270532	0.0151599	2372	tags=31%, list=8%, signal=29%	CHST2/HEXA/GALNS/ST3GAL3/ST3GAL2/OMD/CHST1/B3GNT2/HEXB/B4GALT6
DAZARD_RESPONSE_TO_UV_SCC_UP	105	0.460931	1.71532	0.00155642	0.0087388	0.00489697	1394	tags=26%, list=5%, signal=25%	KYNU/CXCL8/CDKN1C/PMAIP1/IL1B/GADD45A/CXCL1/HIST1H2BK/ATF3/CXCL2/CCL20/FOS/B2M/ATP6AP2/CXCL3/PTGS2/SSR1/PGK1/RIDA/AIMP1/SH3BGRL/MIR22HG/COPB1/PTGES3/TM2D1/SCFD1/TOB1
REACTOME_GLOBAL_GENOME_NUCLEOTIDE_EXCISION_REPAIR_GG_NER	84	0.476958	1.71481	0.00226929	0.0114514	0.00641704	5083	tags=36%, list=18%, signal=29%	COPS8/UBE2V2/CCNH/POLE3/ERCC1/GTF2H2/PARP2/ERCC2/SUMO3/COPS7A/INO80C/TFPT/RUVBL1/ACTR8/POLE4/RFC3/COPS6/RPS27A/INO80E/ACTB/POLD2/UBC/CUL4A/GTF2H5/RBX1/COPS5/POLD1/CHD1L/GTF2H1/UBA52
REACTOME_NEUTROPHIL_DEGRANULATION	439	0.391981	1.71473	0.000353107	0.00297766	0.0016686	4489	tags=34%, list=16%, signal=29%	C3/SERPINA1/S100A8/MME/S100A9/LRG1/SERPINA3/ADGRE5/ALDOC/KCNAB2/FTL/TIMP2/PPBP/ANPEP/C3AR1/FUCA2/FTH1/QSOX1/TNFAIP6/GALNS/PLEKHO2/PTPRJ/CD59/CXCL1/HSPA8/SDCBP/FPR1/MVP/PNP/PSAP/FABP5/ALDH3B1/PGRMC1/PLAU/B2M/ATP6AP2/CTSA/VNN1/GLA/CYBA/STK10/TMEM173/DEGS1/PGM1/NCKAP1L/HLA-B/ARHGAP9/MGST1/PLAUR/ATG7/TICAM2/CCT2/RAB31/PTX3/CTSB/COPB1/PKM/CKAP4/LTF/MLEC/NEU1/HLA-A/TMEM63A/GSDMD/ARMC8/DYNLL1/TXNDC5/RAB…
REACTOME_DNA_DAMAGE_RECOGNITION_IN_GG_NER	38	0.553245	1.71386	0.00668973	0.0253349	0.0141969	5083	tags=42%, list=18%, signal=35%	COPS8/PARP2/COPS7A/INO80C/TFPT/RUVBL1/ACTR8/COPS6/RPS27A/INO80E/ACTB/UBC/CUL4A/RBX1/COPS5/UBA52
REACTOME_TRNA_PROCESSING_IN_THE_NUCLEUS	59	0.508764	1.71372	0.00339147	0.0151061	0.00846504	5836	tags=42%, list=20%, signal=34%	POP1/CSTF2/TRNT1/CLP1/SEH1L/RPP40/RPP38/RTCB/RPP14/NUP54/DDX1/POP5/NUP62/ZBTB8OS/NUP35/NUP43/POP7/RAN/NUP93/TSEN2/POP4/NUP98/XPOT/NUP205/C2orf49
REACTOME_ABC_FAMILY_PROTEINS_MEDIATED_TRANSPORT	100	0.463851	1.71167	0.00180692	0.00971734	0.00544532	5167	tags=44%, list=18%, signal=36%	ABCC2/ABCC3/ABCA6/ERLIN1/EIF2S1/PSMB8/PSMC5/PSME3/ABCF1/PSMB10/VCP/PSMA6/PSMC4/PSMB9/PSMD10/PSME2/ABCD2/PSMA5/PSMD7/PSMD13/PSMB5/ERLEC1/PSMD11/PSME1/EIF2S2/PSMA2/PSMA1/PSMC3/RPS27A/PSMD2/UBC/PSMD4/ABCA8/PEX3/PSMC2/PSMB6/PSMA7/PSMD12/PSMD14/PSMB4/DERL2/UBA52/PSMB3/PSMA3
REACTOME_GLUTATHIONE_CONJUGATION	30	0.579973	1.71087	0.00929073	0.0318361	0.01784	5255	tags=50%, list=18%, signal=41%	GGT5/GCLM/CHAC1/MGST1/CHAC2/GCLC/GSS/GSTO1/GSTA2/CNDP2/GSTZ1/OPLAH/GSTT2B/GGT1/GSTM2
SUBTIL_PROGESTIN_TARGETS	35	0.561135	1.70815	0.00824931	0.0293864	0.0164673	4002	tags=51%, list=14%, signal=44%	CDKN1C/BNIP3/GADD45A/CCND1/AR/BCCIP/EGF/GRB2/DUSP1/JUN/SAP30/UCHL5/TGFA/BCAS2/POLR2K/HDAC9/KAT2B/IL6ST
HAHTOLA_MYCOSIS_FUNGOIDES_CD4_UP	57	0.509596	1.70601	0.00314999	0.0144947	0.00812241	2965	tags=40%, list=10%, signal=36%	KYNU/CDKN1A/CXCL8/SOD2/GLRX/IL1B/CXCL1/ATF3/CXCL2/ENC1/CXCL3/PTGS2/VNN1/PLAUR/PFKFB3/FBN2/NEU1/IER3/MCTP1/HIST2H2BE/BST2/HBEGF/NLRP3
CHEN_HOXA5_TARGETS_9HR_DN	42	0.541202	1.70526	0.00610759	0.0236572	0.0132568	3020	tags=40%, list=11%, signal=36%	CBX6/ANPEP/MAT2A/SERPINH1/RTL8C/CKAP4/ST6GALNAC4/TMEM97/UBTF/ANP32A/FEN1/AP1S1/GEMIN4/MARCKS/MYL9/H2AFX/FJX1
LY_AGING_PREMATURE_DN	30	0.57787	1.70467	0.00974394	0.03291	0.0184418	5744	tags=53%, list=20%, signal=43%	CXCL8/HAS2/PTGS2/TYMS/SERPINB2/KIF2C/MMP3/H2AFX/CKS1B/DDX39A/NASP/UGCG/RANBP1/MCL1/SAFB/HMGN2
ZWANG_EGF_PERSISTENTLY_UP	33	0.566321	1.70444	0.0087256	0.0306197	0.0171584	3427	tags=33%, list=12%, signal=29%	IFIT3/UGDH/ME1/CALU/OASL/OGDH/IDI1/DYNC1LI1/LANCL2/POR/FAM98A
REACTOME_REGULATION_OF_PTEN_STABILITY_AND_ACTIVITY	66	0.494994	1.70391	0.00295058	0.0138904	0.00778379	7165	tags=65%, list=25%, signal=49%	PSMB8/PSMC5/TRIM27/PSME3/STUB1/PSMB10/PSMA6/PSMC4/PSMB9/PSMD10/PSME2/PSMA5/PSMD7/PSMD13/PSMB5/PSMD11/PSME1/PSMA2/PSMA1/PSMC3/RPS27A/PSMD2/UBC/PSMD4/PSMC2/PSMB6/XIAP/PSMA7/PSMD12/PSMD14/PSMB4/UBA52/PSMB3/PSMA3/PSMC6/PSMB7/PTEN/CSNK2B/PSMB1/PSMB2/PSMD1/SEM1/USP13
KIM_WT1_TARGETS_12HR_DN	211	0.417586	1.70268	0.000289101	0.00296587	0.00166199	5031	tags=40%, list=18%, signal=33%	PLOD2/ASPH/SOD2/PLK2/AEN/LIMCH1/ASB1/CCND1/ESM1/EEF1AKNMT/RRS1/EZR/SRSF7/DLC1/CASP4/LAMB1/BDNF/NOP56/NOP16/PDF/TMEM45A/MSANTD2/ACOT2/AIMP1/HMGA2/PUS1/TRIAP1/DUSP1/RIOX2/TGFBR2/ARMC8/HERPUD1/LRP8/NNMT/MYBBP1A/ANP32A/PNN/ZC3H15/FEN1/POLR3K/PFDN2/RAP2C/NOLC1/AMH/YTHDF2/TFB2M/CDV3/RBM25/RHOBTB3/TAF1D/RBM14/GNL3/GLS/CCN2/PPIG/HOXA10/ZFP36L1/CLN5/REXO2/OGFR/SFSWAP/SRSF2/GADD45B/IGF2BP3/AKAP2/TUBB2A/LAT…
REACTOME_CARGO_CONCENTRATION_IN_THE_ER	33	0.56563	1.70236	0.00895522	0.031034	0.0173905	3028	tags=33%, list=11%, signal=30%	SERPINA1/AREG/CD59/LMAN2L/GOSR2/SEC22B/MCFD2/SAR1B/TGFA/PREB/F8
SENGUPTA_NASOPHARYNGEAL_CARCINOMA_UP	293	0.403688	1.70075	0.000317864	0.00296587	0.00166199	4142	tags=30%, list=15%, signal=26%	COL8A1/PAPSS2/TIGAR/FBN1/PMAIP1/COL4A2/TFRC/CHN1/COL27A1/GBP1/TNFAIP6/FN1/IKBIP/ACTA2/FGF2/E2F3/EFNB2/ZWINT/ZNF121/CCT6A/PLAU/MCM8/LAMB1/PTGS2/TDG/NPNT/SGO2/RCN1/COL4A1/SLC39A14/TNFRSF10B/PRNP/TYMS/CKAP4/SOCS1/LLPH/TNFRSF9/STAT1/ZBED3/HELLS/TMEM38B/SRSF3/PBK/GNLY/LINC01094/POGLUT1/FASTKD1/SCML1/QDPR/ADH5/MINPP1/ZNF131/B4GALT6/FAS/PRC1/U2SURP/BST2/SMC4/GLS/CD14/IDH1/ERI1/LAMC1/OTUD6B/DOCK4/CENPK/G…
LIANG_SILENCED_BY_METHYLATION_UP	32	0.570374	1.70049	0.00890005	0.0309128	0.0173226	3089	tags=44%, list=11%, signal=39%	C3/SRGN/SAA1/PAPPA/HIST1H2AC/MFAP5/IFI27/STAT1/KRT8/TNFSF4/HIST2H2BE/MMP3/PF4V1/KRT7
REACTOME_SELENOAMINO_ACID_METABOLISM	115	0.450705	1.70045	0.00104221	0.00642976	0.00360305	8783	tags=61%, list=31%, signal=42%	PAPSS2/GSR/TXNRD1/CBS/RPS27L/SCLY/AIMP1/RARS/AIMP2/NNMT/KARS/EPRS/RPS12/RPL9/RPS27A/RPS10/RPS20/LARS/RPL24/RPL35A/RPLP1/RPL17/RPL8/RPS26/RPS3/RPL13A/FAU/UBA52/RPS3A/RPS19/RPL26L1/RPS28/RPS23/RPL38/RPL41/RPS9/RPSA/RPS6/RPL31/RPS2/RPL27A/RPL5/RPS24/RPS17/RPL34/RPL36AL/RPS25/RPL11/RPS21/RPS29/RPS5/RPL13/RPLP2/RPLP0/RPL22/RPL32/RPS13/RPL36/RPL21/RPL7A/RPL23A/RPS16/RPL30/RPS8/RPL18/RPL26/RPL19/RPL4/IA…
ZHAN_LATE_DIFFERENTIATION_GENES_UP	32	0.570042	1.6995	0.00890005	0.0309128	0.0173226	2346	tags=38%, list=8%, signal=34%	P4HA1/PAM/SRSF7/EMP3/BMP6/SELPLG/S100A6/PPT1/DUSP5/MCFD2/HEXB/TSPAN3
SCHLOSSER_MYC_TARGETS_AND_SERUM_RESPONSE_UP	47	0.528707	1.69861	0.0054788	0.0217729	0.0122009	2799	tags=40%, list=10%, signal=37%	FAM216A/CCDC86/ZPR1/TWISTNB/TSR1/PPRC1/AMD1/NOP2/RCN1/GRPEL1/SLC39A14/PRR3/PRMT1/GEMIN4/VDAC1/SRP72/NME1/EIF5B/ODC1
TAVOR_CEBPA_TARGETS_DN	29	0.580436	1.69807	0.0115489	0.0371215	0.0208018	2881	tags=41%, list=10%, signal=37%	PLOD2/AKR1B1/IFI6/MAP1B/TBXAS1/FOXO1/IFI27/ISG15/THBD/FXR2/ZBTB48/SERPINB1
OUELLET_OVARIAN_CANCER_INVASIVE_VS_LMP_UP	117	0.448893	1.69701	0.00104767	0.00645044	0.00361464	6585	tags=55%, list=23%, signal=42%	IFI44/CFI/IFIT1/UBE2V2/MAPRE1/SDCBP/ARF4/TM4SF1/B2M/SSR1/NMI/CYCS/HERPUD1/LDHA/PTS/CKS2/ATP5F1B/TARS/IFI30/HMGN3/PTGS1/CSTB/GNAS/POLR2K/EPRS/PSMA2/H2AFZ/CKS1B/SNRPB2/DDX39A/SRSF9/SPCS2/ATP5PB/MEST/NASP/ATP5F1C/MDH1/BTG3/CD47/ACP1/PRKDC/COPS5/HNRNPM/RANBP1/HNRNPD/PSMB4/TUBBP1/HMGN1/SLC35A2/PSMA3/GGT1/MAP2K1/SUMO2/YBX1/NUP205/HNRNPU/PSMC6/COX7B/GPI/CSNK2B/SDHB/MRPL3/PSMB2/SPP1
REACTOME_TRANSCRIPTION_COUPLED_NUCLEOTIDE_EXCISION_REPAIR_TC_NER	78	0.479043	1.69612	0.00227445	0.0114514	0.00641704	5083	tags=44%, list=18%, signal=36%	COPS8/CCNH/POLE3/ERCC1/GTF2H2/ERCC2/ERCC8/COPS7A/PPIE/POLR2G/POLR2K/POLR2C/POLE4/RFC3/POLR2L/COPS6/POLR2I/ISY1/RPS27A/POLR2D/POLD2/UBC/POLR2H/CUL4A/POLR2F/GTF2H5/RBX1/COPS5/POLD1/POLR2B/GTF2H1/HMGN1/POLR2E/UBA52
CAFFAREL_RESPONSE_TO_THC_DN	31	0.572246	1.69611	0.00889193	0.0309128	0.0173226	4025	tags=48%, list=14%, signal=42%	DNAJA1/HSPA8/PNP/ZWINT/PABPC4/PPIF/SERPINB2/CALM3/SRSF3/TMEM109/HSPH1/RBM4/CDK1/TUBB/PCLAF
BILD_MYC_ONCOGENIC_SIGNATURE	203	0.417811	1.69533	0.000285878	0.00296587	0.00166199	3499	tags=41%, list=12%, signal=36%	HIST1H2AC/TGM2/SNHG16/SMTN/PCOLCE2/UTP14A/GPATCH4/LSG1/CCDC86/ABCC3/ALDH1B1/METTL1/NOL6/PLAU/PLD6/FARSA/NUFIP1/DDX10/WDR12/NOP56/NOP16/SLC19A1/NOP2/NRP1/RRP9/PTRH2/ERCC1/NLE1/NFKB2/TWNK/NLRP1/DUSP2/SORD/DDAH2/FLAD1/GEMIN5/IMP4/TRMT1/CIART/WDR74/CCDC137/HSPD1/AIMP2/DKC1/TMEM97/INTS6L/IRF9/LBHD1/HSPA1A/MYBBP1A/RCL1/MRTO4/DHODH/UBIAD1/RPP40/RABEPK/NEU3/HS6ST2/NOLC1/PCYOX1L/SRM/ATIC/PNPT1/TFB2M/PA2G4…
MCCLUNG_COCAIN_REWARD_4WK	63	0.495979	1.69413	0.00316148	0.0145257	0.0081398	1963	tags=24%, list=7%, signal=22%	SERPINA1/COL8A1/SLC22A5/UGDH/P4HA1/ZDHHC6/FOS/IL1R2/CAPN6/DUSP1/ZNFX1/SERPINB2/NR4A1/PISD/KLF10
SWEET_LUNG_CANCER_KRAS_DN	373	0.39252	1.69336	0.000336587	0.00296587	0.00166199	2573	tags=21%, list=9%, signal=20%	C3/DCN/SRGN/S100A8/ZEB1/NPR3/LOX/S100A9/SERPINA3/ADGRE5/CDKN1C/PAPSS2/FERMT2/IFIT3/CNTN1/MSLN/TFRC/IL27RA/HSD11B1/IL1B/MFAP5/PAM/TAGLN/ACTA2/CES1/LIMCH1/GPAM/GPX3/RIPOR2/IFITM3/VEGFA/EFNB2/PGRMC1/RDH11/LAMB1/GNG11/BDNF/NPNT/TENT5C/RCN1/EPHA5/VAMP3/GBP3/TMEM45A/MAPT/OMD/CCN5/BMP6/CFHR1/TNS2/DUSP1/JUN/TSPAN7/PSMB10/FEZ2/RECK/SEPT4/ATP1A2/ANTXR2/PRKCE/CFD/GNG2/PAG1/SHOX2/RGS2/SNCA/THBD/ENG/TFPI/PPP2…
KERLEY_RESPONSE_TO_CISPLATIN_UP	42	0.537423	1.69335	0.00704722	0.0262981	0.0147367	2666	tags=43%, list=9%, signal=39%	CDKN1A/TIGAR/PLK2/GDF15/GADD45A/ACTA2/TRIM22/RPS27L/PLK3/FOSL1/PROCR/STK17A/IER3/ZMAT3/DDIT4/FAS/FDXR/PLAT
CHEN_LUNG_CANCER_SURVIVAL	26	0.594018	1.69244	0.0118542	0.0378194	0.0211929	4377	tags=62%, list=15%, signal=52%	SERPINA1/SOD2/EPHX1/PGK1/CALU/P4HB/ENO1/PKM/KRT8/PGAM1/KRT7/PLCB3/GRK4/ATP5F1D/ACTB/HSPA5
REACTOME_BASE_EXCISION_REPAIR_AP_SITE_FORMATION	57	0.504779	1.68988	0.00411921	0.0175137	0.0098142	4328	tags=35%, list=15%, signal=30%	HIST1H2AC/HIST1H2BK/NEIL3/HIST2H2AA4/HIST1H2BG/NEIL2/TDG/HIST1H2BD/HIST2H4A/OGG1/MBD4/HIST1H2BN/HIST2H2BE/H2AFX/TERF2IP/HIST1H2BJ/H2AFZ/NTHL1/HIST1H2BC/TERF2
TSENG_IRS1_TARGETS_UP	101	0.456732	1.68983	0.00257533	0.0126696	0.0070997	3456	tags=36%, list=12%, signal=31%	FERMT2/WNT5A/PRSS23/DBN1/FAP/SRPX/LDLR/EFNB2/NR2F1/ZDHHC6/SDC2/MTHFD2/NOP56/NSUN2/GRB2/BMP6/FBN2/DDX47/HSPA4/TMEM97/MAPK12/LBHD1/FEN1/RCL1/ADORA2B/PAG1/C9orf64/PCYT2/TRIB3/NARS/BPGM/PHB/MID1IP1/SPCS3/CARS/DDIT3
BROWN_MYELOID_CELL_DEVELOPMENT_UP	139	0.436969	1.68928	0.0013488	0.00787658	0.00441381	2318	tags=22%, list=8%, signal=21%	C3/KLHDC4/TGFBI/ANPEP/APOL2/NQO1/GLRX/IL1B/PGD/QSOX1/DGAT2/SP140/ACKR1/SAT1/FPR1/G6PD/DEGS1/IL1R2/PLK3/PLAUR/ATP6V1E1/GLIPR2/TNFRSF1A/ANTXR2/S100A6/SLC6A6/GRN/HEBP1/ZYX/HEXB/ABCD2
REACTOME_INTERLEUKIN_12_SIGNALING	46	0.526897	1.68772	0.00546838	0.0217729	0.0122009	3674	tags=37%, list=13%, signal=32%	SOD2/STAT4/CAPZA1/P4HB/SERPINB2/TCP1/RAP1B/TALDO1/LCP1/PSME2/LMNB1/GSTO1/IL12A/MSN/GSTA2/AIP/SNRPA1
FLECHNER_BIOPSY_KIDNEY_TRANSPLANT_REJECTED_VS_OK_UP	74	0.478423	1.68718	0.00297177	0.0139473	0.00781564	2150	tags=31%, list=8%, signal=29%	S100A8/LAPTM5/ALDOC/HCLS1/ACKR1/S100A4/UBE2L6/FABP5/PSMB8/PIM2/LGALS9/RBMS1/PDE6D/RAB31/LTF/STAT1/CCND3/TYMP/RAB27A/IFITM1/CFD/IFI30/LCP1
REACTOME_DNA_REPLICATION_PRE_INITIATION	83	0.470425	1.68606	0.00303644	0.0140994	0.0079009	6503	tags=55%, list=23%, signal=43%	E2F3/MCM8/PSMB8/PSMC5/POLE3/PSME3/PSMB10/PSMA6/PSMC4/PSMB9/PSMD10/PSME2/PSMA5/PSMD7/PSMD13/PSMB5/PSMD11/PSME1/PSMA2/PSMA1/PSMC3/POLE4/RPS27A/PSMD2/ORC6/UBC/PSMD4/PSMC2/ORC2/PSMB6/PSMA7/PSMD12/CDC7/PSMD14/GMNN/PSMB4/DBF4/UBA52/PSMB3/PSMA3/PSMC6/PSMB7/ORC5/PSMB1/CDC6/PSMB2
HAN_JNK_SINGALING_DN	36	0.549804	1.68546	0.0091617	0.0315352	0.0176714	2848	tags=36%, list=10%, signal=33%	C3/SAA1/HAS2/HSD11B1/IFITM2/SOCS3/IGFBP4/RGS2/PFKP/TAF1D/FAS/CD14/ERO1A
HAN_SATB1_TARGETS_UP	412	0.387058	1.68365	0.000342818	0.00296587	0.00166199	3551	tags=33%, list=12%, signal=30%	PLOD2/SRGN/IL7R/ALDOC/CXCL8/PAPSS2/ASPH/SLC7A11/TIGAR/IFIT3/TGFBI/PDGFRL/WNT5A/VLDLR/IL32/F2RL2/P4HA1/BNIP3/APOL2/CSPG5/MAT2A/GLRX/IL1B/SLC2A6/SERPINH1/SPAG4/LIMCH1/CEMIP2/RPS6KA2/ENO2/LTBP1/CXCL1/APOL3/PDE4B/PCDH9/IFIT2/FICD/XBP1/OSTM1/TMEM132A/F3/TP53I3/DNAJB4/FSTL1/CASP4/LAMB1/ZCCHC24/PTGS2/BDNF/DDX10/SDC2/ITPR1/CASP1/SAMM50/RRP15/IL18R1/ANOS1/DNAJB9/LIF/IL13RA2/TMEM45A/SCO2/TBL1X/ATG7/TRMT61A…
XU_HGF_SIGNALING_NOT_VIA_AKT1_48HR_UP	34	0.556285	1.68329	0.0100871	0.0335134	0.0187799	1324	tags=32%, list=5%, signal=31%	HMOX1/STC1/HPCAL1/UAP1/CCL20/PLAU/ITPKA/ERCC1/ECE1/PHLDA1/ST6GALNAC4
REACTOME_ORC1_REMOVAL_FROM_CHROMATIN	69	0.484542	1.68255	0.0029615	0.0139204	0.00780061	6503	tags=61%, list=23%, signal=47%	MCM8/PSMB8/PSMC5/PSME3/PSMB10/PSMA6/PSMC4/PSMB9/PSMD10/PSME2/PSMA5/PSMD7/PSMD13/PSMB5/PSMD11/PSME1/PSMA2/PSMA1/PSMC3/RPS27A/PSMD2/SKP1/ORC6/UBC/PSMD4/RBX1/PSMC2/ORC2/PSMB6/PSMA7/PSMD12/PSMD14/PSMB4/UBA52/PSMB3/PSMA3/PSMC6/PSMB7/ORC5/PSMB1/CDC6/PSMB2
HSIAO_HOUSEKEEPING_GENES	389	0.388548	1.68206	0.000336587	0.00296587	0.00166199	7332	tags=51%, list=26%, signal=39%	VIM/SQSTM1/SERPINA3/FTL/FTH1/ACKR1/ARF4/GAPDH/IFITM3/EZR/PSAP/XBP1/B2M/CAPZA1/PGK1/VDAC2/SNRPN/HLA-B/PRDX1/DUSP1/ENO1/TMSB4X/TXN/HLA-A/AARS/SON/HSPD1/RPL9P7/LDHA/BECN1/DYNLL1/HYAL2/IFITM1/ATP5F1B/CALM2/HTRA1/ALDOA/KARS/CCT4/CLTA/FUS/ARHGDIB/HDAC1/ARL6IP1/ITGB1/ATIC/ATP5MC2/FLNA/RER1/EIF4A1/FAS/PSMD7/MARCKS/HNRNPL/ECHS1/PGAM1/PSMB5/HSP90AA1/PHB2/ATP5MC1/GSTO1/CSTB/ATF4/GNAS/PRDX6/MSN/PSD/HSP90AB1/…
SOTIRIOU_BREAST_CANCER_GRADE_1_VS_3_UP	154	0.429328	1.68158	0.000828958	0.00539705	0.00302435	4856	tags=40%, list=17%, signal=33%	TXNRD1/BYSL/PIMREG/AURKA/GTSE1/STIP1/ZWINT/JMJD6/CDC20/GTPBP4/RAB5IF/KPNA2/TACC3/HCCS/TXN/CCT5/CKS2/TUBA1C/FEN1/APOBEC3B/SLC52A2/TPX2/ELOC/TIMM10/UBE2S/LMNB1/PRC1/KIF2C/MRPS17/CMC2/NME1/PDSS1/POLR2K/DSCC1/GINS1/DONSON/LAGE3/CDK1/H2AFZ/TOP2A/SNRPC/DDX39A/SPAG5/NUP93/TOMM70/MRPL12/PARPBP/HMCES/CCNB1/CENPN/JPT1/UBE2C/BIRC5/HMGB3/PFDN6/PSMA7/RNASEH2A/PSMD12/CDCA8/NDC80/MRPL15
DELYS_THYROID_CANCER_UP	412	0.386532	1.68137	0.000342818	0.00296587	0.00166199	1979	tags=22%, list=7%, signal=21%	C3/IGFBP3/CFB/KRT14/HMOX1/SERPINA1/COL8A1/CDH2/PROS1/CDKN1A/PDZK1IP1/ALOX15B/ADGRE5/PCDH7/CXCL8/ALOX5AP/DPYD/HAS2/CFI/PMAIP1/MFGE8/TGM2/CHST2/PON2/AREG/MPV17/KDELR3/C3AR1/MUC1/NRCAM/PRSS23/SFTPB/ADAM12/QSOX1/GDF15/TNFAIP6/FN1/ICAM1/KCNQ3/S100A4/FAP/ABCC3/TNC/RPS6KA2/CCND1/MVP/NCF2/PNP/GPRC5B/ALDH3B1/CXCL2/ENC1/SEL1L3/TRIM22/PLAU/TP53I3/CTSA/DUSP4/SLC22A18/PHLDA2/CYBA/EMP3/LIF/NCKAP1L/LOXL2/PLK3/P…
PID_HIV_NEF_PATHWAY	34	0.555635	1.68132	0.0100871	0.0335134	0.0187799	4942	tags=47%, list=17%, signal=39%	BIRC3/CASP8/DFFA/DAXX/CYCS/TNFRSF1A/FADD/RIPK1/CASP7/FAS/MAP3K14/BID/TRAF2/TRADD/CRADD/BCL2
NAGASHIMA_EGF_SIGNALING_UP	57	0.501999	1.68058	0.00484614	0.0198336	0.0111142	3810	tags=51%, list=13%, signal=44%	AREG/AEN/PLEKHO2/ID1/ATF3/FOS/GEM/LIF/IER2/FOSL1/DUSP2/MIR22HG/DUSP1/FOSB/JUN/IER3/NR4A1/EGR4/EPHA2/DUSP5/KLF10/TNFRSF11B/ARC/CCN2/HBEGF/TNFRSF12A/NR4A3/HES1/ZFP36
PHONG_TNF_RESPONSE_VIA_P38_PARTIAL	162	0.426334	1.67966	0.00083682	0.00543667	0.00304655	1524	tags=28%, list=5%, signal=26%	KYNU/CDKN1A/SQSTM1/PCDH7/CXCL8/LHFPL6/HAS2/PMAIP1/PLK2/IL27RA/INSIG1/TNC/FOXO1/CXCL1/ID1/AURKA/CXCL2/CCL20/LDLR/EFNB2/PLAU/DNAJB4/CXCL3/TNFAIP3/BDNF/PPIF/DNAJB9/LIF/NFKB2/SLC39A14/DLEU1/TRIB2/PLAUR/TNFRSF10B/TPST1/PTX3/DUSP1/TOB1/JUN/LINC00869/IRS1/HERPUD1/SERPINB2/IER3/BAZ1A
DORN_ADENOVIRUS_INFECTION_12HR_UP	28	0.579463	1.6794	0.0124378	0.0392368	0.0219872	2778	tags=39%, list=10%, signal=35%	KRT14/PLK2/IFIT1/MMP15/HIST1H2BK/IFIT2/NFKB2/NR4A1/EPHA2/BCAR3/ATF4
LEE_CALORIE_RESTRICTION_MUSCLE_DN	44	0.528806	1.67901	0.00806643	0.029042	0.0162743	2019	tags=23%, list=7%, signal=21%	RIT1/S100A9/ALOX5AP/FBN1/AMD1/DDX56/RELB/NR1D1/HSPH1/POLB
SHEPARD_BMYB_MORPHOLINO_UP	201	0.413159	1.67661	0.000282725	0.00296587	0.00166199	3725	tags=32%, list=13%, signal=28%	S100A8/TRIM16/SQSTM1/TIMP2/DNTTIP2/SIAE/MDM2/LETM2/CASP8/BNIP3L/STIP1/DUS3L/FOS/DNAJB4/B2M/SOCS3/BAX/NCLN/ZNF330/NUDT9/PHLDA2/TYW3/TPD52L2/LYRM1/PLEKHB2/EIF4E/DNAJA3/PRDX1/ARL6IP5/RIOX2/BGN/TYW5/AIMP2/POLR1C/ZNF622/WDR43/NSUN5/HM13/RPP14/DOHH/IFI30/GATD3A/RBM25/C4A/DNAJA2/PRC1/VDAC3/FAM207A/PGAM1/HSP90AA1/PTP4A3/SLC31A1/EFHD2/PSME1/CNDP2/SLC16A6/SSB/MRM1/REXO2/CFAP298/SDF2L1/GNS/ZNF598/HFE/RRP8
ZHU_CMV_24_HR_UP	82	0.468164	1.67513	0.00303337	0.0140994	0.0079009	3870	tags=49%, list=14%, signal=42%	IL7R/IFI6/IMPA1/GBP1/FGFR1/LIG4/ENO2/SAR1A/PNP/SRSF7/STIP1/TRIM22/SSR1/GRPEL1/EIF4E/SLC39A14/ALAS1/ENO1/IFI27/NR4A1/HSPA1A/PSMA6/ISG15/IFITM1/TRIM21/GGCX/EIF5/PFKP/MLLT11/EIF4A1/NAMPT/UBE2S/POLR2K/PSMA2/HSPE1/SNRPB2/SNRPA1/NUP93/TUBB2A/PSMD2
REACTOME_GENE_AND_PROTEIN_EXPRESSION_BY_JAK_STAT_SIGNALING_AFTER_INTERLEUKIN_12_STIMULATION	37	0.543289	1.67442	0.00988733	0.0331204	0.0185597	3674	tags=41%, list=13%, signal=35%	SOD2/STAT4/CAPZA1/SERPINB2/TCP1/RAP1B/TALDO1/LCP1/PSME2/LMNB1/GSTO1/MSN/GSTA2/AIP/SNRPA1
WINZEN_DEGRADED_VIA_KHSRP	97	0.455502	1.67423	0.00333077	0.0149665	0.00838678	2787	tags=34%, list=10%, signal=31%	SERPINE2/PTGFR/CXCL8/HAS2/PAPPA/PMAIP1/EDN2/GDF15/IFIT1/PDGFC/CXCL2/CCL20/IFIT2/F3/CXCL3/PTGS2/BDNF/SDC2/GEM/PLAUR/DNAJB5/YRDC/SPRY4/IRS1/DUSP5/STYK1/B3GNT2/PTGER4/TGFA/CCN2/GPR1/TGFBR3/HBEGF
REACTOME_TRANSCRIPTIONAL_REGULATION_BY_RUNX2	114	0.444211	1.67247	0.00182529	0.00979894	0.00549105	5167	tags=49%, list=18%, signal=40%	CDKN1A/ITGA5/CCND1/TWIST1/AR/RUNX2/PSMB8/BAX/PSMC5/PSME3/ESRRA/STAT1/STUB1/PSMB10/PSMA6/PSMC4/PSMB9/PSMD10/PSME2/HIVEP3/PSMA5/NKX3-2/RBM14/PSMD7/WWTR1/PSMD13/PSMB5/PSMD11/PSME1/PSMA2/PSMA1/HEY2/PSMC3/BGLAP/CDK1/HES1/RPS27A/PSMD2/SKP1/PPARGC1B/SATB2/CCNB1/UBC/PSMD4/RBX1/PSMC2/PSMB6/PSMA7/BMP2/PSMD12/PSMD14/CBFB/PSMB4/UBA52/PSMB3/PSMA3
HOFFMANN_SMALL_PRE_BII_TO_IMMATURE_B_LYMPHOCYTE_DN	35	0.549289	1.67209	0.0100825	0.0335134	0.0187799	4165	tags=43%, list=15%, signal=37%	IL7R/PTGR1/GLRX/GPAM/RAB6B/CDC20/AP4B1/ZBED3/SELENOP/SMARCA4/PTPRG/IL6ST/CCNB1/FCGR2A/SLC16A1
REACTOME_BASE_EXCISION_REPAIR	85	0.463576	1.6696	0.00354161	0.0156609	0.00877592	4451	tags=33%, list=16%, signal=28%	HIST1H2AC/HIST1H2BK/NEIL3/HIST2H2AA4/HIST1H2BG/NEIL2/TDG/POLE3/HIST1H2BD/HIST2H4A/PARP2/OGG1/FEN1/POLB/MBD4/HIST1H2BN/HIST2H2BE/H2AFX/TERF2IP/HIST1H2BJ/POLE4/H2AFZ/RFC3/NTHL1/POLD2/HIST1H2BC/TERF2/APEX1
TAKEDA_TARGETS_OF_NUP98_HOXA9_FUSION_3D_UP	169	0.42123	1.66871	0.000840101	0.005441	0.00304898	1919	tags=24%, list=7%, signal=23%	RTN1/IFI44L/IFI44/LOX/LGALS3BP/CDKN1C/IFIT3/HIST1H2AC/BAMBI/IFI6/GBP1/PRSS23/IFIT1/SAMD9L/MVP/PCDH9/IFIT2/TRIM9/TRIM22/IFI35/PTGS2/PARP10/VNN1/SDSL/SP110/GBP3/CCDC71L/IFI27/BEND6/STAT1/ZNF503/OASL/IRF9/NKAIN2/ISG15/IFITM1/CLEC2B/C3orf80/IGFBP4/DTX3L/EPSTI1
REACTOME_A_TETRASACCHARIDE_LINKER_SEQUENCE_IS_REQUIRED_FOR_GAG_SYNTHESIS	25	0.591983	1.66779	0.016	0.0472481	0.0264765	3235	tags=52%, list=11%, signal=46%	DCN/SDC3/GPC6/CSPG5/SDC2/GPC1/B3GAT3/BGN/B4GALT7/XYLT2/BCAN/AGRN/GPC2
YAO_TEMPORAL_RESPONSE_TO_PROGESTERONE_CLUSTER_12	74	0.472698	1.66699	0.00321942	0.0147263	0.0082522	5318	tags=38%, list=19%, signal=31%	LGALS3BP/SLC39A8/PTGR1/AKR1B10/CASP8/DECR1/ATP6AP2/GNG11/EMP3/ARL6IP5/CKS2/NTPCR/ANTXR2/PHPT1/FKBP9/IDH1/PSME1/MPDU1/HSD17B10/HIKESHI/FARS2/ARPC1A/FKBP7/GNAI2/ERGIC3/RBMX/GNA12/NAP1L1
SARRIO_EPITHELIAL_MESENCHYMAL_TRANSITION_UP	179	0.417168	1.66659	0.000564653	0.00408472	0.00228896	4952	tags=39%, list=17%, signal=32%	IGFBP3/SERPINE2/SRXN1/SMTN/CCND1/FGF2/BRIX1/RRS1/FABP5/ENC1/ZWINT/F3/PGK1/FOSL1/PLAUR/PHLDA1/TACC3/TYMS/STAMBPL1/YRDC/ENO1/RELT/SERPINB2/CALM3/LRP8/ETV1/HELLS/POLR3K/CCT4/ARPC5L/TIMM10/VEGFC/UBE2S/RBM14/PRC1/HSP90AA1/CMC2/ODC1/H2AFX/TNFRSF12A/FJX1/DSCC1/ARPC1B/TUBB3/CDK1/TUBB4B/HSPE1/RFC3/TOP2A/CKS1B/SDF2L1/UGGT2/AKAP2/ANKRD1/ENOPH1/TUBB/UBE2T/ORC6/TUBA8/CCNB1/SLC20A1/MYBL1/STEAP1/SAPCD2/CDC7/TGF…
MUELLER_PLURINET	293	0.395239	1.66515	0.000317864	0.00296587	0.00166199	4498	tags=37%, list=16%, signal=31%	FAM136A/PMAIP1/POP1/GADD45A/TCERG1/NOP58/BYSL/CCND1/TOE1/HSPA8/BRIX1/PNP/AURKA/STIP1/BCCIP/PPAN/NOP56/AATF/SLC19A1/LRIF1/NLE1/PSME3/POLG2/CEBPZ/SNRPN/GTF2H2/KPNA2/PRNP/DAXX/SOCS1/HSPD1/NOC2L/AIMP2/POLR1C/MRM3/EXOSC9/CKS2/PRMT5/SRSF3/PSMA6/MYBBP1A/ANP32A/PNN/FEN1/HSPH1/NME1-NME2/RPP40/FUS/HSPA14/NOLC1/GAR1/SMN1/HDAC1/LSM6/TPX2/POP5/ATIC/GEMIN2/PA2G4/SMNDC1/RBM14/ARL4A/GNL3/EXOSC3/PHB/MRPS12/LSM1/N…
JOHNSTONE_PARVB_TARGETS_2_DN	339	0.388741	1.66416	0.000324886	0.00296587	0.00166199	4611	tags=33%, list=16%, signal=28%	SRGN/SLC39A8/LHFPL6/COLGALT1/GBE1/DPYD/ASPH/IFRD1/HS3ST3B1/DSEL/C8orf33/TCERG1/LIMCH1/PPIL1/PDGFC/RUNX2/E2F3/NR2F1-AS1/SRRM1/PAK1IP1/SEC22B/GCNT2/F2R/CRYZ/SYNJ2BP/RBMS3/SSR1/RIOK1/CASP1/BTC/CPNE8/BACE2/C1orf109/RRP36/TRIB2/DDAH2/TPST1/ELOVL5/ISOC1/RDH13/STK17A/UTP11/TOMM20/AKIRIN1/IRS1/POLR1C/RBM26/HSPA4/SHISA2/PGBD1/SRSF3/HSPA1A/MRPS10/MSRB3/C1GALT1/POPDC3/TSPAN5/RAP2C/SHOX2/HDAC1/SLC35B3/CREM/T…
ANDERSEN_LIVER_CANCER_KRT19_DN	68	0.48068	1.66354	0.00418719	0.0177217	0.00993075	3044	tags=25%, list=11%, signal=22%	SERPINA3/PAPSS2/PTGR1/AOX1/TNIP1/EPHX1/HSD3B7/SLC25A25/SELENBP1/PGRMC1/DECR2/ACSL5/GRHPR/ARMC5/PRDX6/SLC31A1/ADRA1B
REACTOME_SIRT1_NEGATIVELY_REGULATES_RRNA_EXPRESSION	59	0.493774	1.66323	0.00581395	0.0228967	0.0128306	4252	tags=32%, list=15%, signal=27%	HIST1H2AC/HIST1H2BK/HIST2H2AA4/HIST1H3G/HIST1H2BG/TAF1A/HIST1H2BD/HIST2H4A/HIST1H2BN/HIST2H2BE/TAF1D/HIST1H3H/H2AFX/TAF1B/HIST1H2BJ/H2AFZ/RRP8/SUV39H1/HIST1H2BC
HOEBEKE_LYMPHOID_STEM_CELL_DN	80	0.467247	1.66269	0.0030426	0.0141066	0.00790493	2710	tags=28%, list=10%, signal=25%	CFH/SRGN/SERPINE2/NPR3/SLC39A8/PMAIP1/IL1B/GADD45A/LIMCH1/KHDRBS3/RPS27L/TMEM45A/CKS2/HSPA1A/S100A6/COX7A2L/SUCLG2/RGS2/OGFOD3/MARCKS/BST2/MLLT3
GROSS_HYPOXIA_VIA_ELK3_ONLY_DN	43	0.523755	1.66079	0.00893067	0.030984	0.0173625	2736	tags=30%, list=10%, signal=27%	CBX6/MAFB/AOX1/S100A4/CSF3/NCBP2/SIPA1/PDRG1/CDKN2C/IGFBP4/MINPP1/MARCKS/PXDN
REACTOME_NUCLEOTIDE_BINDING_DOMAIN_LEUCINE_RICH_REPEAT_CONTAINING_RECEPTOR_NLR_SIGNALING_PATHWAYS	54	0.501504	1.6597	0.00648104	0.0248521	0.0139264	6721	tags=56%, list=24%, signal=43%	BIRC3/IKBKG/CASP8/CASP4/TNFAIP3/CASP1/NFKB2/NLRP1/BCL2L1/TXN/MEFV/MAPK12/MAP3K7/SUGT1/PSTPIP1/HSP90AB1/NLRP3/IRAK2/RPS27A/UBC/UBE2V1/BCL2/UBA52/MAPK11/PANX1/UBE2N/NLRC4/CHUK/RELA/APP
LEE_LIVER_CANCER_MYC_DN	49	0.511636	1.65936	0.00668737	0.0253349	0.0141969	1852	tags=24%, list=7%, signal=23%	CFH/KYNU/SERPINA3/DPYD/DMBT1/IL1R1/RIDA/CFHR1/ELOVL5/TDO2/HERPUD1/HSPH1
GRAESSMANN_RESPONSE_TO_MC_AND_SERUM_DEPRIVATION_DN	81	0.464764	1.65927	0.00328864	0.0148717	0.00833369	4431	tags=36%, list=16%, signal=30%	KRT14/CA9/MED24/GBE1/KDELR3/PVR/IL15RA/ENO2/GALK1/VEGFA/GCNT2/CDC37/POLR3K/ODF2/NAAA/PIGU/PPFIA4/PHEX/ERO1A/SERPINB1/EFHD2/CNDP2/HOMER1/PDLIM7/GYS1/AC092338.1/NASP/MAN2B2/EMC4
DANG_REGULATED_BY_MYC_DN	239	0.401596	1.65822	0.000302663	0.00296587	0.00166199	2881	tags=27%, list=10%, signal=24%	CFB/HMOX1/CDH2/CDKN1A/LOX/JPH2/FTL/PMAIP1/TIMP2/NXN/VLDLR/FTH1/GADD45A/PAM/IFIT1/FN1/MDM2/ANXA6/FBLN5/CCND1/SDCBP/ARF4/VEGFA/VARS/IFI35/F3/F2R/FSTL1/BDNF/GPC1/CCNH/GDI1/CASP1/ALDH9A1/VAMP3/GTF2H2/PLAUR/PYCR1/DUSP1/TMSB4X/CTSB/TCHH/TGFBR2/TSPAN7/RRM2B/IER3/SEPT4/PEA15/SNCA/ITGB1/ARHGAP25/PTPN1/TMEM126A/FAS/PPIE/ACSL1/CCN2/CSTB/HBEGF/GAA/MYL12A/LAMC1/MSN/SERPINB1
ONGUSAHA_TP53_TARGETS	32	0.555753	1.6569	0.0134642	0.0416586	0.0233443	2417	tags=38%, list=8%, signal=34%	SERPINE2/CDKN1A/SRXN1/NQO1/MDM2/EPHX1/SAT1/DAXX/TOB1/ZMAT3/DDIT4/FAS
KEGG_SELENOAMINO_ACID_METABOLISM	26	0.581079	1.65557	0.0154328	0.0461626	0.0258682	2527	tags=35%, list=9%, signal=32%	GGT5/PAPSS2/MAT2A/CBS/SCLY/MARS2/METTL2B/BUD23/TRMT11
BLALOCK_ALZHEIMERS_DISEASE_INCIPIENT_DN	155	0.421943	1.65441	0.000827358	0.00539705	0.00302435	3813	tags=32%, list=13%, signal=28%	ALOX5AP/ASPH/GLRX/MPV17/TMOD1/DNAJA1/CLIC2/SAT1/CD59/UROS/UTP18/MKKS/GRPEL1/COL4A1/DEAF1/CCT2/TOP1/MGLL/CCT5/CKS2/SEC23B/ECH1/ZMAT3/PFDN2/EIF2B3/HSPH1/CCT4/COX7A2L/GTF2A2/USP15/ATIC/CCT3/EIF2B1/AHSA1/ACAD8/HSP90AA1/CACYBP/GNAS/PDHA1/HSP90AB1/WRB/DNAJC8/RPE/ZFR/ROBO1/RGS4/AKAP2/NEDD8/SDHA
KEGG_ALZHEIMERS_DISEASE	153	0.422641	1.65411	0.000828958	0.00539705	0.00302435	5701	tags=47%, list=20%, signal=38%	MME/IL1B/CASP8/GAPDH/PLCB4/ITPR1/BACE2/MAPT/PLCB2/GRIN2D/CYCS/ATP5PD/TNFRSF1A/CALM3/ATP5F1B/CALM2/COX7A2L/SNCA/NDUFB5/ATP5F1E/FADD/ATP5MC2/CYC1/CASP7/FAS/NDUFA8/ATP5MC1/NCSTN/UQCR11/NDUFA9/PLCB3/NDUFV3/BID/NDUFA6/ERN1/ATP5PO/SDHA/HSD17B10/ATP5F1D/ATP5PB/NDUFB2/NDUFS3/COX7A2/NDUFA10/ATP5F1C/NDUFB9/ATP5MC3/NDUFB3/NDUFB1/UQCRQ/NDUFC2/UQCRHL/NDUFA3/COX5B/NDUFS2/CDK5/NDUFB8/ATP5F1A/NDUFS6/SDHD/ATF6/UQ…
SMITH_TERT_TARGETS_DN	86	0.458146	1.65354	0.00381001	0.016544	0.00927076	2201	tags=28%, list=8%, signal=26%	KYNU/SAA1/UGP2/AKR1C3/TNFSF9/PON2/PAM/PML/TAGLN/STAT4/PNP/PGF/CBR1/SP110/SORD/CLP1/FOSB/FAH/CPOX/ARHGDIB/IFI30/FAM53B/IDI1/ARHGAP25
BRIDEAU_IMPRINTED_GENES	51	0.505172	1.65277	0.00667939	0.0253349	0.0141969	2803	tags=31%, list=10%, signal=28%	DCN/CDKN1C/TNFRSF10D/PON2/OSBPL5/KCNQ1/SLC22A18/PHLDA2/SFMBT2/SNRPN/PON3/QPCT/DDC/COPG2/COMMD1/GNAS
ZHOU_INFLAMMATORY_RESPONSE_LIVE_UP	385	0.381785	1.65167	0.000337838	0.00296587	0.00166199	3295	tags=24%, list=12%, signal=22%	SYDE1/SQSTM1/TNFSF9/SOD2/ZEB2/FERMT2/BAMBI/WNT5A/IL1A/SMTN/SGPP2/IL1R1/IL1B/ZC3H12A/STARD8/ADGRL3/SLC2A6/MAP1B/ICAM1/TNIP1/CSF3/CXCL1/ICOSLG/S1PR3/CD83/PCDH9/CXCL2/VEGFA/DENND5A/CCL20/LDLR/MFSD2A/SELENBP1/F3/CXCL3/TNFAIP3/PTGS2/GPC1/CGAS/RAB6B/COL4A1/LIF/NFKB2/EIF4E/SLC39A14/RELB/FGFR1OP2/PLK3/FOSL1/DUSP2/PLAUR/CCN5/CREB5/PTX3/DNAJB5/YRDC/MIR22HG/DUSP1/PKM/TNFRSF9/DYRK3/SERPINB2/CA8/IER3/HSPA1A/S…
WANG_HCP_PROSTATE_CANCER	103	0.445029	1.65104	0.00336439	0.0150292	0.00842196	2698	tags=30%, list=9%, signal=27%	IGFBP3/SLC39A8/CDKN1C/AEN/WNT5A/MSLN/CSPG5/MUC1/FTH1/FGFR1/FN1/TWIST1/CLIC3/ATF3/TACC2/TP53I3/CTSA/STC2/B3GAT3/DUSP1/ASS1/LONP1/PDLIM5/HTRA1/RGS2/DGKD/SECTM1/TAF1D/NAMPT/BPGM/MORC2
SANSOM_APC_TARGETS_REQUIRE_MYC	215	0.403544	1.65088	0.000287356	0.00296587	0.00166199	6168	tags=45%, list=22%, signal=35%	CCDC86/EEF1AKNMT/GRWD1/METTL1/GTSE1/TRIM9/VARS/DUS3L/FHOD1/PPAN/NOP56/WDR62/NOL8/RRP9/PABPC4/SLC35B2/ERCC1/NFKB2/GEMIN5/TRMT61A/SNX24/TP53RK/NFS1/ZBED3/SRD5A3/LRP8/WDR4/OGG1/MYBBP1A/ALKBH2/NSUN5/METTL2A/RABEP2/HIRA/CCT4/SIGMAR1/NOLC1/GAR1/MAP4K4/SRM/DPH2/DDAH1/TFPT/ZBTB48/CCT7/NME1/POFUT1/MUS81/LANCL2/TNFRSF12A/QTRT1/WRB/KNOP1/TELO2/SMYD5/NTMT1/BID/HOMER1/SFSWAP/NCEH1/TTC27/TUBB2A/EMC8/STOML1/RAS…
JIANG_HYPOXIA_NORMAL	199	0.407206	1.65073	0.000281849	0.00296587	0.00166199	4672	tags=34%, list=16%, signal=28%	IGFBP3/HMOX1/PLOD2/LOX/UGP2/ALDOC/ASPH/SOD2/TGM2/P4HA1/BNIP3/DDX41/PDGFC/ENO2/TSKU/HIF1A/SDCBP/BNIP3L/GNPDA1/KHDRBS3/STC2/ANGPTL4/ARHGEF2/PIM2/ENOSF1/P4HB/DUSP1/TOMM20/FAM162A/HLA-A/PSMB10/SERBP1/SLC35E1/RNF114/TMEM30A/PEA15/MED10/CA12/AMH/AC074143.1/RER1/NARS/MSMO1/NEK6/LAMC1/CD2BP2/EIF2S2/RHBDD3/SLC30A1/BLVRB/SPATA20/KPNA4/GADD45B/MLF1/ZFP36/DDX19B/SAP30BP/UGCG/NMT1/ORMDL1/TFG/PPP1R11/HSPA5/RAB…
APRELIKOVA_BRCA1_TARGETS	47	0.513748	1.65055	0.00809909	0.0290809	0.0162961	3006	tags=30%, list=11%, signal=27%	VIM/RIT1/FGFR1/DNAJA1/TAGLN/ACTA2/DDX21/EIF2S1/DDX24/KRT8/DDX1/ANXA5/HSP90AA1/EPRS
JOHNSTONE_PARVB_TARGETS_1_DN	61	0.487239	1.64992	0.00536847	0.0214739	0.0120334	2425	tags=31%, list=9%, signal=29%	STC1/HIST1H2AC/INSIG1/LIMCH1/TNC/GPAT3/KHDRBS3/GPX8/RBMS1/BICC1/CTSB/ETV1/SRSF3/HSPA1A/ACOT13/MCTP1/FUS/ADH5/PTGER4
CHIARADONNA_NEOPLASTIC_TRANSFORMATION_KRAS_CDC25_UP	54	0.498529	1.64985	0.00720115	0.0267097	0.0149674	2615	tags=26%, list=9%, signal=24%	SERPINA1/CDKN1A/AREG/TGFBI/GADD45A/CCND1/EIF2S1/GPC1/TMSB4X/SELENOF/FUT8/SEMA7A/WWTR1/PSMB5
NAKAMURA_METASTASIS_MODEL_UP	42	0.523605	1.64981	0.0096312	0.0327097	0.0183296	4092	tags=48%, list=14%, signal=41%	LAPTM5/HCLS1/DUSP3/SLC16A3/TOR4A/PGK1/FOSL1/CMTM3/MEPCE/NOB1/DDX24/DUSP5/FKBP10/PDE10A/TYRO3/DPCD/TUBB2A/PDK3/STX4/TUBB6
GROSS_HYPOXIA_VIA_ELK3_AND_HIF1A_DN	96	0.449459	1.64936	0.00409417	0.017473	0.00979138	4962	tags=40%, list=17%, signal=33%	LGALS3BP/COL4A2/IL1R1/MAT2A/CCND1/MGAT2/SRSF7/PPAT/F2R/AMD1/KPNA2/NSL1/APLN/ZMAT3/SIGMAR1/TRIM21/PYCR2/MAP3K11/FAS/CACYBP/AKAP8/AGRN/WRB/G3BP1/IFNGR2/SRSF2/SRSF10/RAD1/MOGS/TARDBP/CCNB1/UBE2C/TEX30/ARL4C/PMP22/MGAT4B/TK2/TBC1D1
BROWNE_HCMV_INFECTION_24HR_DN	136	0.426774	1.64658	0.00160729	0.0089914	0.00503852	2444	tags=26%, list=9%, signal=24%	IGFBP3/COL8A1/CDKN1A/FBN1/CCN3/PRSS23/PTPRM/ACTA2/S100A4/POLR3G/CD59/RPS6KA2/RIPOR2/BNIP3L/CTSO/UROS/TP53I3/B2M/FADS1/GRIK2/NR1H3/TRAPPC12/ERCC2/FBN2/TGFBR2/ATP5PD/RECK/IFITM1/GAS6/HOXA11/SUCLG2/CA12/TPM2/HIPK2/MGMT/DDAH1
SPIELMAN_LYMPHOBLAST_EUROPEAN_VS_ASIAN_UP	478	0.373428	1.64629	0.000366435	0.00301754	0.00169094	5902	tags=37%, list=21%, signal=30%	SRGN/ADGRE5/FBN1/IL27RA/SLC2A6/ACTA2/EZR/AURKA/DOK1/RRP1/B2M/RPS27L/FARSA/SCLY/BAX/DAPP1/PPAN/ZNF330/APEX2/GCHFR/GDI1/CCDC85B/COPG1/HK2/HIST1H2BD/CRCP/CDC20/ERCC1/FGFR1OP/MAD1L1/GTF2H2/DEAF1/SPG7/DECR2/B3GAT3/TACC3/GNL2/DNAJB5/PSMC3IP/SUPT5H/IL21R/SLC12A9/PQBP1/SRP19/CKS2/MAPK12/HHLA3/HSPA1A/B4GALT7/ARHGDIB/HDAC1/MYL6B/HMBS/MRM2/ATP5MC2/GSS/PSME2/TSPAN3/PKN1/PTP4A1/CYB5B/VDAC3/SLC39A7/HNRNPL/SMAR…
REACTOME_UB_SPECIFIC_PROCESSING_PROTEASES	191	0.409215	1.64595	0.000564653	0.00408472	0.00228896	5240	tags=39%, list=18%, signal=32%	BIRC3/HIST1H2AC/MDM2/IKBKG/HIST2H2BF/RNF128/HIF1A/HIST1H2BK/AR/HIST2H2AA4/HIST1H2BG/PSMB8/PSMC5/HIST1H2BD/PTRH2/CDC20/PSME3/VDAC2/TOMM20/CLSPN/PSMB10/BECN1/PSMA6/MAP3K7/PSMC4/PSMB9/POLB/PSMD10/USP15/HIST1H2BN/RIPK1/VDAC1/PSME2/PSMA5/ADRM1/HIST2H2BE/VDAC3/PSMD7/KEAP1/PSMD13/PSMB5/PSMD11/RUVBL1/USP2/PSME1/PSMA2/PSMA1/RCE1/HIST1H2BJ/USP18/PSMC3/MUL1/TRAF2/USP34/TOMM70/RPS27A/PSMD2/USP11/UBC/PSMD4/HI…
FOSTER_TOLERANT_MACROPHAGE_UP	142	0.424167	1.64466	0.00107962	0.00663382	0.00371741	2844	tags=23%, list=10%, signal=21%	CFB/IFI44/LOX/SAA1/SLC7A11/TGFBI/IFRD1/GLRX/TXNRD1/PVR/FPR1/RGL1/SLC16A3/SLAMF9/MTHFD2/GEM/TENT5C/CCDC71L/CLMP/ASS1/STAT1/GALNT15/PRKRIP1/PSMD10/CDC42EP2/DCBLD2/ACSL1/BST2/CTTN/SLFN12/PPFIA3/BAK1/SLC31A1
MANALO_HYPOXIA_UP	198	0.406055	1.64439	0.000282087	0.00296587	0.00166199	3028	tags=28%, list=11%, signal=25%	IGFBP3/PLOD2/CDH2/LOX/STC1/CDKN1C/GBE1/TGFBI/VLDLR/COL4A2/P4HA1/BNIP3/EGLN3/PLOD1/PAM/SPAG4/LIMCH1/RPS6KA2/ENO2/TSKU/BNIP3L/VEGFA/PGF/LAMB1/TNFAIP3/GPC1/MTHFD2L/STC2/ANGPTL4/COL4A1/PGM1/BACE2/LOXL2/HLA-B/TMEM45A/TRIB2/TNFRSF10B/BGN/CHST1/CYP4F11/IER3/SEPT4/HTRA1/P4HA2/GAS6/SHOX2/DDIT4/VEGFC/MARCH3/FKBP9/PTGS1/GLS/ENPP1/ERO1A/PPARG/F8
REACTOME_HIV_ELONGATION_ARREST_AND_RECOVERY	32	0.551454	1.64408	0.0146052	0.0443864	0.0248729	5599	tags=50%, list=20%, signal=40%	ELOA/SUPT5H/ELOC/POLR2G/POLR2K/POLR2C/POLR2L/SUPT16H/POLR2I/POLR2D/POLR2H/POLR2F/POLR2B/POLR2E/ELOB/NELFE
REACTOME_DEPURINATION	50	0.505327	1.64402	0.00741804	0.0272827	0.0152885	4328	tags=32%, list=15%, signal=27%	HIST1H2AC/HIST1H2BK/NEIL3/HIST2H2AA4/HIST1H2BG/HIST1H2BD/HIST2H4A/OGG1/HIST1H2BN/HIST2H2BE/H2AFX/TERF2IP/HIST1H2BJ/H2AFZ/HIST1H2BC/TERF2
KYNG_DNA_DAMAGE_DN	171	0.413418	1.64213	0.000841043	0.005441	0.00304898	4414	tags=37%, list=15%, signal=31%	IGFBP3/VIM/SERPINE2/LOX/SAA1/PDGFRL/GLRX/GBP1/PRSS23/GADD45A/FN1/DNAJA1/FLOT1/CCND1/FGF2/ID1/BNIP3L/SSR3/CXCL2/SUOX/CCNH/ALDH9A1/ADAMTS1/EIF4E/CALU/TNFRSF10B/FGFR4/DAXX/CYCS/SERPINB2/MOK/NNMT/HK1/PRMT1/RABGGTB/HEXB/MT1X/SEMA7A/RHOBTB3/PTGER4/COPS7A/VDAC3/CCN2/SNX8/COG6/ANKRD11/ARPC1B/IFNGR2/NRP2/PRKAB1/AGPAT1/CEBPB/TLE1/HSD17B10/PDCD5/PPP2CA/UGCG/NMT1/ATOX1/ITGAL/POLR2F/BTG3/OAZ1
RUTELLA_RESPONSE_TO_CSF2RB_AND_IL4_UP	324	0.385929	1.64185	0.000325415	0.00296587	0.00166199	2916	tags=27%, list=10%, signal=24%	TNIP3/C1S/KYNU/CDKN1A/AKR1C1/SQSTM1/BIRC3/SLC7A11/TGM2/IL1A/TFRC/IL1R1/HSD11B1/NQO1/EGLN3/FTH1/ADAM12/PVR/ME1/TNFAIP6/CLIC2/CYP27B1/CD59/CCND1/RGL1/CD83/METTL1/SLAMF7/LDLR/ACO1/SEC22B/ELOA/CRYZ/RDH11/EIF2S1/FADS1/SDC2/BATF3/DAPP1/GCLM/NRP1/ZNF274/ANOS1/IL1R2/ALAS1/TPST1/PRDX1/MGLL/ARL6IP5/IER5/TXN/IL21R/ST8SIA1/EED/TMEM97/TUBA1C/MRPL35/EMG1/SLAMF8/EIF2B3/DUSP5/RAB13/GAS6/MAP4K4/ATP6V0E1/POGLUT1/F…
REACTOME_GLUCOSE_METABOLISM	86	0.454593	1.64071	0.00457201	0.0189571	0.010623	6300	tags=42%, list=22%, signal=33%	ALDOC/ENO2/GAPDH/GNPDA1/HK2/PGK1/ADPGK/PFKFB3/ENO1/PKM/SEH1L/HK1/ALDOA/PPP2CB/NUP54/NUP62/SLC25A1/PFKP/BPGM/PGAM1/TPI1/NUP35/NUP43/NUP93/PPP2CA/SLC25A10/MDH1/PKLR/SLC25A11/PGP/NUP98/NUP205/GNPDA2/PGAM2/GPI/SLC25A12
SARRIO_EPITHELIAL_MESENCHYMAL_TRANSITION_DN	149	0.42059	1.64065	0.00109559	0.00669163	0.0037498	765	tags=24%, list=3%, signal=24%	CFB/KRT14/S100A8/C1S/KRT16/KYNU/IFI44/PDZK1IP1/MME/ROS1/SERPINA3/CDKN1C/MAFB/SOD2/BIRC3/HIST1H2AC/IL1R1/NFIL3/PLEKHO2/S100A4/INSIG1/SAT1/IFITM2/CXCL1/SDCBP/MVP/BNIP3L/IFITM3/ATF3/PSAP/PCDH9/FOS/CXCL3/TNFAIP3/GEM/VNN1
REACTOME_SWITCHING_OF_ORIGINS_TO_A_POST_REPLICATIVE_STATE	88	0.452118	1.63853	0.00433452	0.0182252	0.0102129	6503	tags=57%, list=23%, signal=44%	MCM8/PSMB8/PSMC5/PSME3/ANAPC7/PSMB10/PSMA6/PSMC4/PSMB9/PSMD10/PSME2/PSMA5/CDC26/PSMD7/PSMD13/PSMB5/PSMD11/PSME1/ANAPC4/PSMA2/PSMA1/PSMC3/RPS27A/PSMD2/SKP1/ORC6/UBC/PSMD4/UBE2C/RBX1/PSMC2/ORC2/PSMB6/PSMA7/PSMD12/PSMD14/PSMB4/UBA52/PSMB3/PSMA3/ANAPC2/ANAPC5/ANAPC16/PSMC6/PSMB7/ANAPC11/ORC5/PSMB1/CDC6/PSMB2
GRAHAM_NORMAL_QUIESCENT_VS_NORMAL_DIVIDING_UP	60	0.484959	1.63775	0.00656934	0.0250964	0.0140633	2378	tags=37%, list=8%, signal=34%	KYNU/SOD2/HIST1H2AC/AREG/IL1B/FTH1/STAT4/CXCL1/TM4SF1/PCDH9/CXCL2/CXCL3/PTGS2/VNN1/IL18R1/TPBG/MIR22HG/TNFSF4/CREM/TSPAN31/TFPI/HIST2H2BE
LI_WILMS_TUMOR_VS_FETAL_KIDNEY_1_DN	161	0.415126	1.63441	0.00111111	0.00675944	0.0037878	4165	tags=34%, list=15%, signal=29%	CDH2/FAM216A/CHN1/TXNRD1/TCERG1/AURKA/FADS1/GPC1/MTHFD2/NCBP2/POLE3/CDC20/KPNA2/HMGA2/CHST1/BUB3/DKC1/BAZ1A/CKS2/SEPT6/FEN1/APOBEC3B/NOLC1/MAP4K4/TPX2/GREB1/MYL6B/DDX1/CCT3/PFKP/LMNB1/DLG5/KIF2C/SMC4/NME1/DDX23/YAF2/GARS/SACS/PRPF40A/CDK1/H2AFZ/TOP2A/CKS1B/COL13A1/SNRPA1/SPAG5/TARBP2/NASP/CBX5/PCLAF/ROR2/XRCC5/CXCR4/SLC16A1
AMIT_SERUM_RESPONSE_40_MCF10A	32	0.548191	1.63435	0.0162026	0.0475759	0.0266602	2454	tags=47%, list=9%, signal=43%	DCN/IL1A/PVR/FPR1/ATF3/CXCL2/FOS/CXCL3/DUSP1/FOSB/JUN/NR4A1/RGS2/NAMPT/CLIC4
PID_CASPASE_PATHWAY	48	0.506243	1.63384	0.00812425	0.0291103	0.0163126	3533	tags=40%, list=12%, signal=35%	VIM/BIRC3/CASP8/DFFA/CASP4/BAX/CASP1/TOP1/CYCS/TNFRSF1A/DIABLO/LIMK1/ARHGDIB/RIPK1/CASP7/LMNB1/BID/CASP10/TRAF2
KEGG_CITRATE_CYCLE_TCA_CYCLE	30	0.553216	1.63194	0.0158622	0.0469878	0.0263306	5057	tags=53%, list=18%, signal=44%	ACO1/OGDH/IDH3B/SUCLG2/ACO2/IDH1/PDHA1/DLST/IDH3G/SUCLA2/SDHA/PDHB/MDH1/SUCLG1/ACLY/SDHD
HOFFMANN_SMALL_PRE_BII_TO_IMMATURE_B_LYMPHOCYTE_UP	50	0.501417	1.63129	0.00837521	0.0297656	0.0166798	4830	tags=40%, list=17%, signal=33%	PSAT1/ICAM1/PEPD/CD83/SIPA1/HOXC5/PRPS1/MYBBP1A/SUCLG2/CXCR5/HMBS/SERPINB1/EHD1/HES1/ABHD14A/LAT2/VEGFB/LTB/CNR2/FLII
LEE_LIVER_CANCER_ACOX1_DN	49	0.502852	1.63087	0.00883688	0.0308612	0.0172937	2186	tags=27%, list=8%, signal=25%	SERPINA1/AKR1C1/HSD11B1/SELENBP1/ETNK2/NR1H3/TNFRSF10B/PHLDA1/TDO2/CPOX/SLCO2B1/TPM2/CYP26A1
SMITH_LIVER_CANCER	46	0.508424	1.62854	0.0109368	0.0356406	0.0199719	4670	tags=39%, list=16%, signal=33%	CXCL8/BNIP3/HTATIP2/TBCE/AURKA/PGRMC1/TNFAIP3/SDC2/TOB1/PEX2/DDC/RHOBTB3/ANXA7/TOP2A/FDPS/PDCD5/PFDN6/COPS5
MILI_PSEUDOPODIA_HAPTOTAXIS_UP	500	0.367543	1.62682	0.000371058	0.00304406	0.00170581	4318	tags=29%, list=15%, signal=25%	ZEB1/UGP2/TAF13/UTP14A/GPATCH4/MAP1B/DNAJA1/SAMD9L/UBE2V2/RPF2/HIF1A/NIFK/IFIT2/ZNF121/SNX6/DNAJB4/PNO1/SYNJ2BP/TWISTNB/DDX10/CGAS/TSR1/FASTKD2/CCNH/ACSL4/ERGIC2/CSTF2/C1orf216/MTHFD2L/THUMPD3/IWS1/CPSF6/ESF1/TXNDC9/KIF5B/TIMM8A/GTPBP4/FGFR1OP2/PUM3/PDK1/C9orf85/MSANTD4/RBM34/GNL2/SH3BGRL/PSMC3IP/MAK16/BEND6/FAM229B/TTC1/DKC1/NEMF/MRPS18C/EXOSC9/TAF9/WDR43/EIF3J/SEPT6/TRIP4/SRSF3/TXNL1/PIP4K2A/TM…
REACTOME_RUNX1_REGULATES_TRANSCRIPTION_OF_GENES_INVOLVED_IN_DIFFERENTIATION_OF_HSCS	117	0.430217	1.6264	0.00314301	0.0144947	0.00812241	5175	tags=41%, list=18%, signal=34%	HIST1H2AC/HIST1H2BK/HIST2H2AA4/HIST1H3G/HIST1H2BG/PSMB8/CCNH/PSMC5/HIST1H2BD/HIST2H4A/PSME3/PSMB10/PSMA6/PSMC4/PSMB9/PSMD10/HIST1H2BN/PSME2/PSMA5/HIST2H2BE/PSMD7/PSMD13/PSMB5/HIST1H3H/PSMD11/H2AFX/PSME1/PSMA2/PSMA1/HIST1H2BJ/PSMC3/H2AFZ/RPS27A/PSMD2/UBC/PSMD4/HIST1H2BC/PSMC2/PSMB6/PSMA7/PSMD12/PSMD14/CBFB/PSMB4/UBA52/PSMB3/PSMA3/HIST1H4A
STONER_ESOPHAGEAL_CARCINOGENESIS_UP	35	0.53409	1.62582	0.0148946	0.0451262	0.0252874	4612	tags=43%, list=16%, signal=36%	SH2D2A/PVR/FTSJ3/CRK/TTC1/TXNL1/PSMA6/ATP6V0E1/SEPT7/TGFA/CTTN/RAB1A/PCLAF/ACP1/GPN2
BERENJENO_ROCK_SIGNALING_NOT_VIA_RHOA_DN	47	0.505537	1.62417	0.010243	0.0338313	0.0189581	4377	tags=38%, list=15%, signal=32%	FERMT2/COL4A2/PRSS23/ACTA2/XBP1/F3/NRP1/JADE1/COL4A1/IER2/CSF1/MYL12A/SSB/PDLIM7/KAT2B/LUC7L3/UGCG/HSPA5
REACTOME_DUAL_INCISION_IN_TC_NER	65	0.473318	1.62412	0.00688807	0.0258641	0.0144935	5720	tags=49%, list=20%, signal=39%	CCNH/POLE3/ERCC1/GTF2H2/ERCC2/ERCC8/PPIE/POLR2G/POLR2K/POLR2C/POLE4/RFC3/POLR2L/POLR2I/ISY1/RPS27A/POLR2D/POLD2/UBC/POLR2H/CUL4A/POLR2F/GTF2H5/RBX1/POLD1/POLR2B/GTF2H1/HMGN1/POLR2E/UBA52/PRPF19/ZNF830
HERNANDEZ_MITOTIC_ARREST_BY_DOCETAXEL_2_UP	58	0.484265	1.62374	0.00802724	0.0289662	0.0162319	2166	tags=26%, list=8%, signal=24%	SQSTM1/SOD2/HIST1H2AC/IL32/PRSS23/GADD45A/IL1RL1/PLAU/MGST1/PHLDA1/CSF1/CKS2/SELENOP/LCP1/MT1X
REACTOME_ACTIVATED_PKN1_STIMULATES_TRANSCRIPTION_OF_AR_ANDROGEN_RECEPTOR_REGULATED_GENES_KLK2_AND_KLK3	57	0.484899	1.62333	0.00823843	0.0293864	0.0164673	3536	tags=26%, list=12%, signal=23%	HIST1H2AC/HIST1H2BK/AR/HIST2H2AA4/HIST1H3G/HIST1H2BG/HIST1H2BD/HIST2H4A/HIST1H2BN/PKN1/HIST2H2BE/HIST1H3H/H2AFX/HIST1H2BJ/H2AFZ
CHIARADONNA_NEOPLASTIC_TRANSFORMATION_CDC25_UP	112	0.432076	1.62312	0.00388802	0.0167568	0.00939006	2140	tags=28%, list=8%, signal=26%	C3/SAA1/HAS2/AOX1/IL1R1/UTP14A/CXorf38/TNC/ENO2/LSP1/TWIST1/IL1RL1/EFNB2/PGRMC1/F2R/NPNT/CAPN6/MAGED1/PHLDA1/TPST1/TOP1/PTX3/CTSB/ANP32E/CSF1/SRRT/SRSF3/NOCT/PSPC1/GTF2A2/OSMR
LEE_LIVER_CANCER_MYC_E2F1_DN	48	0.502334	1.62123	0.0100358	0.0334893	0.0187664	2770	tags=27%, list=10%, signal=24%	CFH/KYNU/HSD11B1/SLC25A22/ME1/ETNK2/NR1H3/CFHR1/ELOVL5/TDO2/CPOX/ACSL1/MARC1
LANDIS_BREAST_CANCER_PROGRESSION_DN	67	0.470293	1.6212	0.00618047	0.0238791	0.0133812	2147	tags=28%, list=8%, signal=26%	ZEB1/CCDC80/TGFBI/GPAM/SRPX/DECR1/FSTL1/LAMB1/NRP1/MAN1A1/COL4A1/PGM1/NR1H3/ALAS1/FEZ2/S100A6/HTRA1/GAS6/THBD
MARTORIATI_MDM4_TARGETS_FETAL_LIVER_UP	222	0.395573	1.6208	0.000294638	0.00296587	0.00166199	4620	tags=37%, list=16%, signal=32%	PLOD2/SERPINE2/CDKN1A/GBE1/PMAIP1/AEN/VLDLR/P4HA1/BNIP3/EGLN3/MDM2/TAGLN/GALK1/PDE4B/BNIP3L/IFITM3/SLC16A3/SYNM/CHAC1/STC2/HK2/PGK1/PGM1/TMEM45A/PDK1/CCDC58/PHLDA1/ENO1/CIART/LLPH/FAM162A/PLCD4/EDA2R/DYRK3/SAP30/IER3/THEM6/NUDT5/PRTG/ZMAT3/P4HA2/KCNE3/CA12/DDIT4/ATP5F1E/PFKP/RNF165/JDP2/NAMPT/MAP3K20/LMNB1/PTP4A3/CCN2/ERO1A/UBE2K/ELP6/CXorf40A/GINS1/BLOC1S2/PDXP/LAGE3/RPS12/NME4/ATP5MD/TIMM8B/RAB…
IGLESIAS_E2F_TARGETS_UP	133	0.420485	1.62031	0.00238032	0.0118523	0.00664171	2278	tags=20%, list=8%, signal=18%	C3/DCN/LAPTM5/CDKN1C/UGDH/SERPINH1/DNAJA1/ACTA2/CES1/SAT1/TIMM22/B2M/BAX/GBP3/COL4A1/TMEM45A/EED/S100A6/CFD/IGFBP4/SLC25A4/GAS6/ITGB1/LCP1/ADH5/SEPT7
WENG_POR_TARGETS_LIVER_UP	34	0.535302	1.6198	0.0158184	0.0469035	0.0262834	2543	tags=29%, list=9%, signal=27%	HMOX1/UGDH/PRNP/TMEM97/ANTXR2/IDI1/CYP26A1/CYB5B/MSMO1/ANXA5
REACTOME_INTERLEUKIN_1_FAMILY_SIGNALING	130	0.422587	1.6196	0.00239489	0.0118967	0.00666657	5167	tags=40%, list=18%, signal=33%	SAA1/SQSTM1/IL1A/IL1R1/IL1B/IKBKG/IL1RL1/PSMB8/NKIRAS1/PSMC5/SIGIRR/CASP1/IL18R1/PSME3/NFKB2/IL1R2/PSMB10/PSMA6/MAP3K7/PSMC4/PSMB9/PSMD10/PSME2/PSMA5/PSMD7/PSMD13/PSMB5/PSMD11/PSME1/PSMA2/TNIP2/PSMA1/IRAK2/PSMC3/STAT3/RPS27A/PSMD2/SKP1/UBC/PSMD4/RBX1/PSMC2/PSMB6/PSMA7/PTPN12/UBE2V1/PSMD12/PSMD14/PSMB4/UBA52/PSMB3/PSMA3
MARTINEZ_RESPONSE_TO_TRABECTEDIN_UP	69	0.46641	1.61959	0.005923	0.0231178	0.0129546	5996	tags=49%, list=21%, signal=39%	SRGN/SAT1/IFITM2/IFITM3/ATF3/CTSA/CXCL3/PGK1/VKORC1/GUK1/SOCS1/CDC37/CYCS/HIST1H1C/IFITM1/ANXA5/ADAM9/GNAS/FKBP1A/GADD45B/SERTAD1/ITGAE/NDUFA13/SKP1/COX7A2/RHBDD2/WBP1/UBA52/ATP6V1G1/UQCRB/YBX1/SKP1P1/IGFBP6/SOD1
DACOSTA_UV_RESPONSE_VIA_ERCC3_XPCS_UP	25	0.574614	1.61886	0.0217778	0.0591304	0.033135	4418	tags=48%, list=16%, signal=41%	CDKN1C/SAT1/PCDH9/ALDH1B1/TRIM21/BUD23/GLS/ADO/MPDU1/MED6/TERF2/IRF1
GUILLAUMOND_KLF10_TARGETS_DN	28	0.557981	1.61714	0.0189959	0.0531511	0.0297843	1635	tags=32%, list=6%, signal=30%	PAPSS2/AACS/VNN1/ELOVL5/TMSB4X/RPL7L1/AQP9/SEC61A1/SRSF3
REACTOME_HIV_LIFE_CYCLE	146	0.416012	1.61711	0.00136017	0.0079128	0.00443411	5892	tags=43%, list=21%, signal=34%	TAF13/TAF7/LIG4/ELOA/CCNH/NCBP2/TAF12/GTF2H2/ERCC2/SUPT5H/SEH1L/CHMP7/TAF9/FEN1/GTF2E2/NUP54/GTF2A2/TAF3/NUP62/ELOC/UBAP1/TAF11/CHMP4A/POLR2G/NUP35/POLR2K/POLR2C/NUP43/CHMP3/POLR2L/RAN/BANF1/SUPT16H/POLR2I/NUP93/RCC1/VPS37A/RPS27A/POLR2D/XRCC5/CXCR4/UBC/POLR2H/NMT1/POLR2F/GTF2H5/CHMP6/RANBP1/GTF2B/POLR2B/GTF2H1/POLR2E/UBA52/PSIP1/ELOB/NUP98/CHMP5/NELFE/VPS37C/XRCC6/NUP205/VPS4A/CD4
CHESLER_BRAIN_HIGHEST_GENETIC_VARIANCE	31	0.545502	1.61684	0.0180119	0.051271	0.0287308	5072	tags=39%, list=18%, signal=32%	PAM/MAP1B/ACKR1/COL4A1/PHLDA1/C4orf3/RPP14/RGS19/BCAT2/ACAA1/THUMPD1/MTIF2
REACTOME_COPII_MEDIATED_VESICLE_TRANSPORT	68	0.466424	1.6142	0.00541872	0.0216466	0.0121301	4384	tags=34%, list=15%, signal=29%	SERPINA1/AREG/CD59/LMAN2L/GOSR2/SEC22B/NSF/YKT6/SCFD1/MCFD2/SEC16A/SAR1B/TGFA/CSNK1D/NAPB/TRAPPC3/PREB/F8/TRAPPC4/CTSZ/RAB1A/TFG/TRAPPC2L
REACTOME_NONSENSE_MEDIATED_DECAY_NMD_INDEPENDENT_OF_THE_EXON_JUNCTION_COMPLEX_EJC	92	0.442193	1.61416	0.00561798	0.0222106	0.0124462	9190	tags=72%, list=32%, signal=49%	RPS27L/NCBP2/RPS12/RPL9/ETF1/RPS27A/RPS10/RPS20/EIF4G1/RPL24/RPL35A/RPLP1/RPL17/RPL8/RPS26/RPS3/RPL13A/FAU/UBA52/RPS3A/RPS19/RPL26L1/RPS28/RPS23/RPL38/RPL41/RPS9/RPSA/RPS6/GSPT1/RPL31/RPS2/RPL27A/RPL5/RPS24/RPS17/RPL34/RPL36AL/RPS25/RPL11/RPS21/RPS29/RPS5/RPL13/RPLP2/RPLP0/RPL22/RPL32/RPS13/RPL36/RPL21/NCBP1/RPL7A/RPL23A/RPS16/RPL30/UPF1/RPS8/RPL18/RPL26/RPL19/RPL4/RPS14/RPS18/RPS11/RPS15
FLECHNER_PBL_KIDNEY_TRANSPLANT_REJECTED_VS_OK_UP	63	0.472302	1.61326	0.00826848	0.0294204	0.0164864	4793	tags=41%, list=17%, signal=34%	SERPINE2/CDKN1C/HIST1H2AC/MPV17/TXNRD1/B2M/KPNA2/SELPLG/DAXX/ANP32E/DCTN6/POLR1C/PDLIM5/CENPB/TRA2A/AGPAT1/DNPEP/LYN/TUBB2A/PCGF2/SPCS2/XRCC5/CD47/UBE2E3/PTPN12/PSMD14
YAO_TEMPORAL_RESPONSE_TO_PROGESTERONE_CLUSTER_10	69	0.464418	1.61267	0.005923	0.0231178	0.0129546	5190	tags=49%, list=18%, signal=40%	UFM1/GRWD1/APMAP/NSUN2/VDAC2/PRDX1/RRBP1/LDHA/SEC61A1/DYNLL1/PEX2/C9orf64/SF3A3/EIF3G/TIMM23/CCT7/CACYBP/YIPF5/BCKDHB/SSB/HSPE1/POLR2L/TMEM11/SARNP/SERP1/POLR2F/FKBP2/CHCHD7/AP4S1/OSTC/TRIR/GCSH/ARCN1/EDF1
GRAESSMANN_APOPTOSIS_BY_SERUM_DEPRIVATION_DN	222	0.393357	1.61171	0.000294638	0.00296587	0.00166199	4110	tags=30%, list=14%, signal=26%	KRT14/HMOX1/CA9/STC1/MED24/GBE1/TGM2/SRXN1/BNIP3/KDELR3/EDN2/PVR/DGAT2/MAP1B/IL15RA/BAG2/ENO2/CAPN5/GALK1/VEGFA/F3/GCNT2/STK10/PDK1/ABHD6/TACC3/DUSP1/ASS1/ST6GALNAC4/FAM162A/JUN/CDC37/GCLC/TXNL1/KCNJ14/ANP32A/POLR3K/ODF2/NAAA/P4HA2/CA12/DUSP9/CACNA1G/BORCS7/PIGU/PPFIA4/MUS81/ANO10/ARMC5/ERO1A/SERPINB1/FLT3LG/EFHD2/CNDP2/EHD1/HOMER1/ADAMTS15/PDLIM7/GYS1/AC092338.1/RIC8A/NOS2/NASP/CZIB/OSBPL6/HIKES…
TSAI_RESPONSE_TO_RADIATION_THERAPY	31	0.543544	1.61104	0.0182399	0.0516796	0.0289598	3226	tags=52%, list=11%, signal=46%	CFB/LGALS3BP/IFI6/VEGFA/IFIT2/COL4A1/TGFBR2/ISG15/IFITM1/TNFRSF11B/VEGFC/BST2/PLAT/CCN2/TGFBR3/TSC22D1
NAKAMURA_ADIPOGENESIS_LATE_DN	34	0.531668	1.6088	0.0169647	0.049346	0.0276521	1220	tags=24%, list=4%, signal=23%	IGFBP3/SERPINE2/LOX/GDF15/IER2/PDE6D/AIMP1/ABI3BP
KHETCHOUMIAN_TRIM24_TARGETS_UP	42	0.51027	1.60779	0.0136246	0.0419008	0.02348	1359	tags=29%, list=5%, signal=27%	VIM/CDKN1A/LAPTM5/TGM2/COL4A2/AFP/ICAM1/FOS/CASP1/COL4A1/TGFBR2/STAT1
KEGG_BASE_EXCISION_REPAIR	34	0.531259	1.60756	0.0171939	0.0497292	0.0278668	4780	tags=47%, list=17%, signal=39%	NEIL3/NEIL2/TDG/APEX2/POLE3/PARP2/OGG1/FEN1/POLB/MBD4/POLE4/NTHL1/PARP3/POLD2/APEX1/POLD1
CAFFAREL_RESPONSE_TO_THC_24HR_5_UP	31	0.542056	1.60663	0.0182399	0.0516796	0.0289598	4447	tags=48%, list=16%, signal=41%	TFRC/TXNRD1/LIG4/PNP/CNBP/EXOSC4/CKS2/MYL6B/SELENOP/NAMPT/PSMA2/ZFP36L1/TUBB/ATP5MC3/RBX1
REACTOME_TRANSCRIPTIONAL_REGULATION_BY_SMALL_RNAS	98	0.436259	1.6066	0.00460358	0.0190622	0.0106819	5372	tags=34%, list=19%, signal=27%	HIST1H2AC/HIST1H2BK/HIST2H2AA4/HIST1H3G/HIST1H2BG/HIST1H2BD/HIST2H4A/SEH1L/NUP54/HIST1H2BN/NUP62/HIST2H2BE/HIST1H3H/H2AFX/POLR2G/NUP35/POLR2K/POLR2C/NUP43/HIST1H2BJ/H2AFZ/POLR2L/RAN/POLR2I/NUP93/POLR2D/POLR2H/HIST1H2BC/POLR2F/POLR2B/POLR2E/HIST1H4A/NUP98
BHATI_G2M_ARREST_BY_2METHOXYESTRADIOL_UP	114	0.426616	1.60622	0.00443286	0.0185308	0.0103841	3171	tags=31%, list=11%, signal=27%	KYNU/SOD2/TNFSF14/TFRC/FAP/PDGFC/AURKA/HIST1H3G/FOS/ELOA/EIF2S1/GNG11/SCLY/MPP4/GCLM/CDC20/PLEKHB2/FGFR1OP/SMOX/HIST1H1C/IER3/LIMK1/RAB27A/PBK/PNN/ASRGL1/CTPS1/LSM6/SPHK1/CERK/WWTR1/HSP90AA1/SPCS3/NDUFA9/PSMA2
REACTOME_PIWI_INTERACTING_RNA_PIRNA_BIOGENESIS	26	0.56322	1.60469	0.0216954	0.059076	0.0331045	5046	tags=58%, list=18%, signal=48%	PLD6/HSP90AA1/FKBP6/POLR2G/POLR2K/POLR2C/POLR2L/POLR2I/POLR2D/POLR2H/POLR2F/MYBL1/POLR2B/MOV10L1/POLR2E
GRADE_COLON_VS_RECTAL_CANCER_UP	35	0.527002	1.60425	0.0169569	0.049346	0.0276521	3707	tags=40%, list=13%, signal=35%	IL1A/HABP4/STX2/UMPS/FSTL1/TEX10/CTPS1/HTRA3/MAP3K20/ERO1A/LAGE3/DDX50/GADD45B/ADGRF5
REACTOME_TRANSCRIPTIONAL_ACTIVATION_OF_MITOCHONDRIAL_BIOGENESIS	55	0.482528	1.60351	0.0103415	0.0341002	0.0191088	3899	tags=35%, list=14%, signal=30%	SOD2/PPRC1/POLG2/TWNK/ALAS1/TBL1X/NR1D1/ESRRA/GABPB1/CYCS/ATP5F1B/TFB2M/POLRMT/TGS1/TFAM/HELZ2/SSBP1/MTERF1/PPARGC1B
PACHER_TARGETS_OF_IGF1_AND_IGF2_UP	33	0.532659	1.60312	0.0188289	0.0529077	0.029648	1512	tags=33%, list=5%, signal=32%	SLC7A11/IFRD1/GDF15/GADD45A/MAP1B/VEGFA/DNAJB9/SFMBT2/ASS1/HERPUD1/PSPH
GARGALOVIC_RESPONSE_TO_OXIDIZED_PHOSPHOLIPIDS_MAGENTA_UP	27	0.55591	1.60284	0.0217343	0.0591088	0.0331229	2573	tags=33%, list=9%, signal=30%	RIT1/DNAJA1/HSPA8/MAFG/PTGS2/C16orf72/BTN2A1/PTP4A1/BPGM
REACTOME_HOST_INTERACTIONS_OF_HIV_FACTORS	128	0.419292	1.60148	0.00240128	0.0119091	0.00667352	6008	tags=47%, list=21%, signal=37%	AP2M1/B2M/PSMB8/PSMC5/PSME3/SEH1L/HLA-A/PSMB10/PSMA6/PSMC4/PSMB9/AP2A1/SLC25A4/AP1S1/NUP54/PSMD10/NUP62/ELOC/PSME2/PSMA5/PSMD7/PSMD13/PSMB5/AP1M1/PSMD11/NUP35/PSME1/AP2S1/NUP43/PSMA2/PSMA1/PSMC3/RAN/BANF1/NUP93/RCC1/RPS27A/PSMD2/SKP1/UBC/PSMD4/RBX1/PSMC2/PSMB6/PSMA7/RANBP1/PSMD12/PSMD14/PSMB4/UBA52/PSMB3/PSIP1/RAC1/PSMA3/ELOB/NUP98/NUP205/CD4/PSMC6/PSMB7
PID_NFAT_TFPATHWAY	36	0.522405	1.60147	0.016262	0.0476646	0.0267099	2955	tags=33%, list=10%, signal=30%	CXCL8/RNF128/FOS/PTGS2/BATF3/GBP3/FOSL1/PRKCQ/JUN/EGR4/PTPN1/PPARG
LI_CISPLATIN_RESISTANCE_DN	30	0.54274	1.60103	0.0197145	0.0547923	0.030704	1385	tags=30%, list=5%, signal=29%	CFH/AKR1C1/AKR1C3/PCDH7/BAMBI/DSEL/CFHR1/TDO2/PBDC1
SCHLINGEMANN_SKIN_CARCINOGENESIS_TPA_UP	31	0.539907	1.60026	0.0186959	0.0526789	0.0295198	3367	tags=39%, list=12%, signal=34%	S100A8/S100A9/MAT2A/ANXA6/TRNT1/NABP1/CREB3/SRM/NME1/ODC1/SELENOS/SLPI
PETRETTO_CARDIAC_HYPERTROPHY	34	0.52873	1.59991	0.0185695	0.0524	0.0293635	653	tags=24%, list=2%, signal=23%	IGFBP3/FBN1/MFAP5/FN1/TAGLN/ACTA2/TM4SF1/FSTL1
AMIT_SERUM_RESPONSE_480_MCF10A	37	0.518725	1.59871	0.0163256	0.0478051	0.0267886	3853	tags=57%, list=14%, signal=49%	COPS8/SLC25A32/PVR/MFAP5/SLC26A2/MT1F/CYB5R1/FOSL1/PTX3/CD3EAP/SIGMAR1/MRM2/CDV3/TIMM23/GMEB2/KRT10/ADGRG2/MRGBP/KRT6A/NSMF/SPRR2A
TSAI_RESPONSE_TO_IONIZING_RADIATION	137	0.414009	1.59809	0.0018797	0.0100557	0.00563495	2787	tags=29%, list=10%, signal=26%	KRT14/S100A8/CDKN1A/CDKN1C/BIRC3/COL4A2/FGFR1/GDF15/FN1/CD59/CD83/CCL20/ENC1/ATF5/PLAU/TNFAIP3/CASP1/ZNF274/SIPA1/NFKB2/HOXC5/ENO1/STAT1/RRM2B/PLOD3/DKC1/KRT8/IRF9/IFITM1/PRMT1/CCT4/GRN/NDUFB5/MAX/VEGFC/FAS/ZBTB48/CCT7/TGFBR3/HBEGF
LENAOUR_DENDRITIC_CELL_MATURATION_UP	104	0.429865	1.59725	0.00440186	0.0184517	0.0103398	2254	tags=28%, list=8%, signal=26%	LGALS3BP/KCNAB2/BIRC3/TGM2/TFRC/HSD11B1/QSOX1/GDF15/TNFAIP6/CD59/ARF4/CD83/FABP5/CBS/CCNH/CCDC85B/NR1H3/SNRPN/TRIB2/ACOT2/MGLL/DUSP1/CSF1/PTPRO/DUSP5/GAS6/HMGN3/PFKP/CYB5A
REACTOME_COLLAGEN_BIOSYNTHESIS_AND_MODIFYING_ENZYMES	65	0.4652	1.59626	0.00787208	0.0285072	0.0159746	2351	tags=28%, list=8%, signal=25%	PLOD2/COL8A1/COLGALT1/COL4A2/P4HA1/PCOLCE2/P4HA3/COL27A1/P3H1/PLOD1/SERPINH1/COL12A1/COL4A1/P4HB/PLOD3/P4HA2/ADAMTS3/COL24A1
CROONQUIST_STROMAL_STIMULATION_UP	53	0.483847	1.59516	0.0114888	0.0370449	0.0207589	2119	tags=43%, list=7%, signal=40%	IGFBP3/LOX/TGM2/TGFBI/SFTPB/ACTA2/CXCL1/ID1/CXCL2/FOS/CXCL3/IER2/PIM2/DUSP1/TMSB4X/FOSB/IER3/NNMT/IGFBP4/SLC25A4/RGS2/BASP1/TPM2
HELLER_HDAC_TARGETS_SILENCED_BY_METHYLATION_DN	268	0.381452	1.59308	0.000307977	0.00296587	0.00166199	2910	tags=30%, list=10%, signal=27%	HMOX1/PDE3B/LAPTM5/TNFRSF10D/ZEB2/SLC7A11/IFRD1/PSAT1/IL27RA/GDF15/GADD45A/SERPINH1/CLIC2/CCND1/SNTB1/PFAS/MAFG/ATF3/ALDH3B1/VEGFA/FMNL1/SRSF7/ATF5/XBP1/FKBP11/CBS/DNAJB4/ZMYND8/PPRC1/CASP1/CHAC1/DNAJB9/PIM2/BTN3A2/TIMM44/CDKN2C/PDK1/BCL2L1/TYMS/SLC25A15/SELPLG/DNAJB12/GALNT14/IL21R/BAG3/HSPD1/PSMB10/RAB15/LINC00869/HERPUD1/LONP1/LRP8/FXYD5/TXNDC5/PHF11/HSPA1A/CLEC2B/NOL12/HSPH1/QPCT/SUMO3/SUCLG2…
SCHMIDT_POR_TARGETS_IN_LIMB_BUD_UP	25	0.565436	1.593	0.024	0.0636947	0.0356927	4744	tags=40%, list=17%, signal=33%	INSIG1/LDLR/FGL1/IDI1/CYP26A1/MSMO1/MVD/ACAT2/FDPS/ACLY
REACTOME_ASYMMETRIC_LOCALIZATION_OF_PCP_PROTEINS	62	0.467334	1.59062	0.00947522	0.0323596	0.0181334	5167	tags=53%, list=18%, signal=44%	WNT5A/PSMB8/PSMC5/PSME3/PSMB10/PSMA6/PSMC4/PSMB9/PSMD10/PSME2/PSMA5/PSMD7/PSMD13/PSMB5/PSMD11/PSME1/PSMA2/PSMA1/PSMC3/FZD5/RPS27A/PSMD2/UBC/PSMD4/PSMC2/PSMB6/PSMA7/PSMD12/PSMD14/PSMB4/UBA52/PSMB3/PSMA3
REACTOME_TCR_SIGNALING	107	0.425924	1.58987	0.00413437	0.0175224	0.00981905	7048	tags=54%, list=25%, signal=41%	PTPRJ/IKBKG/PSMB8/PSMC5/PSME3/PRKCQ/PSMB10/PSMA6/MAP3K7/GRAP2/PAG1/PSMC4/PSMB9/PSMD10/PSME2/PSMA5/PSMD7/PSMD13/PSMB5/NCK1/PSMD11/PSME1/PSMA2/PSMA1/PSMC3/RPS27A/PSMD2/SKP1/PTPN22/UBC/PSMD4/PSMC2/PSMB6/PSMA7/UBE2V1/PSMD12/PSMD14/PIK3R2/PSMB4/UBA52/PSMB3/PSMA3/CSK/CD4/UBE2N/PSMC6/PSMB7/PTEN/PTPRC/PSMB1/CHUK/PSMB2/RELA/LCP2/PIK3R1/NFKBIA/PSMD1/SEM1
BURTON_ADIPOGENESIS_PEAK_AT_8HR	36	0.518167	1.58848	0.0171782	0.0497292	0.0278668	4165	tags=44%, list=15%, signal=38%	ITGA5/SRXN1/UAP1/IL1RL1/NOP56/PPP1R2/FOSL1/TOP1/RCL1/HSPH1/GSTO1/PRDX6/POR/TUBB2A/CEBPB/SLC16A1
JOHANSSON_GLIOMAGENESIS_BY_PDGFB_UP	55	0.477889	1.5881	0.0117845	0.0376416	0.0210933	891	tags=20%, list=3%, signal=19%	HMOX1/SERPINE2/SDC3/FTL/FN1/CCND1/FOS/B2M/RPS27L/PPP1R18/CDC20
REACTOME_TNFR1_INDUCED_NFKAPPAB_SIGNALING_PATHWAY	29	0.542455	1.58695	0.0249094	0.0653152	0.0366008	5083	tags=52%, list=18%, signal=43%	BIRC3/IKBKG/TNFAIP3/TNFRSF1A/MAP3K7/RIPK1/USP2/TRAF2/RBCK1/RPS27A/UBC/TRADD/RNF31/XIAP/UBA52
REACTOME_METABOLISM_OF_WATER_SOLUBLE_VITAMINS_AND_COFACTORS	118	0.419322	1.58642	0.00447016	0.0186358	0.010443	3563	tags=28%, list=13%, signal=25%	AOX1/TPK1/SLC25A32/NMNAT1/MOCS2/PTGS2/MTHFD2/PARP10/VNN1/SLC19A1/MTHFD2L/MMAA/FLAD1/NFS1/PPCDC/NNMT/RFK/SLC52A2/MMAB/MMADHC/CYB5A/CD320/NAMPT/SLC25A19/GSTO1/ENPP1/MTHFD1L/SLC5A6/MMACHC/PARP8/FPGS/NMNAT2/NAXD
MCBRYAN_PUBERTAL_BREAST_3_4WK_DN	32	0.532	1.58608	0.0216796	0.059076	0.0331045	2031	tags=28%, list=7%, signal=26%	IGFBP3/CDKN1A/PAM/RIPOR2/NFKB2/ALAS1/REEP6/PRKAG2/RGS2
BECKER_TAMOXIFEN_RESISTANCE_UP	50	0.487471	1.58592	0.0122039	0.0387787	0.0217305	2529	tags=42%, list=9%, signal=38%	IFI44/LGALS3BP/IFI6/IFIT1/EPHX1/TAGLN/ID1/IFITM3/DECR1/B2M/NMI/PROCR/IFI27/IRF9/ISG15/IFITM1/GTF2E2/SELENOP/TSPAN3/ARL4A/BST2
LEONARD_HYPOXIA	43	0.50014	1.58591	0.0159812	0.0472481	0.0264765	2534	tags=47%, list=9%, signal=42%	CDKN1C/P4HA1/BNIP3/MUC1/NFIL3/VEGFA/SLC16A3/F3/JMJD6/STC2/PGK1/DUSP1/SAP30/ALDOA/ADORA2B/P4HA2/DDIT4/PFKP/PHC2/TGFA
KEGG_CYTOKINE_CYTOKINE_RECEPTOR_INTERACTION	184	0.396075	1.58535	0.000849858	0.00546974	0.00306509	3277	tags=26%, list=12%, signal=23%	IL7R/CXCL8/TNFSF9/TNFRSF10D/TNFRSF6B/TNFSF14/PPBP/IL1A/IL1R1/IL1B/PLEKHO2/IL15RA/PDGFC/CSF3/CXCL1/CXCL2/VEGFA/CCL20/CXCL3/EGF/IL18R1/LIF/IL1R2/TNFRSF10B/RELT/IL21R/TNFRSF10A/TNFRSF9/TGFBR2/EDA2R/TNFRSF1A/CSF1/TNFSF4/CXCR5/AMH/OSMR/TNFRSF11B/VEGFC/FAS/IL12A/TNFRSF21/PF4V1/TNFRSF12A/FLT3LG/TNFRSF25/IFNGR2/IL17RA
WONG_ENDMETRIUM_CANCER_DN	64	0.46288	1.58505	0.00978234	0.0329594	0.0184695	2054	tags=17%, list=7%, signal=16%	DCN/PID1/MME/FBN1/PAPPA/CNRIP1/SRPX/GLT8D2/GNLY/GAS6/PARM1
REACTOME_DEUBIQUITINATION	266	0.379213	1.58429	0.00030553	0.00296587	0.00166199	5240	tags=36%, list=18%, signal=30%	TNIP3/BIRC3/HIST1H2AC/TNIP1/MDM2/IKBKG/HIST2H2BF/RNF128/HIF1A/HIST1H2BK/AR/HIST2H2AA4/TNFAIP3/HIST1H2BG/PSMB8/PSMC5/HIST1H2BD/PTRH2/CDC20/PSME3/VDAC2/STAMBPL1/TOMM20/TGFBR2/CLSPN/PSMB10/BECN1/VCP/PSMA6/MAP3K7/OTUB2/PSMC4/PSMB9/BABAM2/POLB/PSMD10/USP15/HIST1H2BN/RIPK1/VDAC1/PSME2/PSMA5/ADRM1/HIST2H2BE/VDAC3/PSMD7/UCHL5/KEAP1/INO80C/PSMD13/PSMB5/TFPT/PSMD11/RUVBL1/NLRP3/ACTR8/USP2/PSME1/PSMA2/TNIP2…
GNATENKO_PLATELET_SIGNATURE	43	0.499369	1.58346	0.0162162	0.0475759	0.0266602	4414	tags=44%, list=15%, signal=37%	HIST1H2AC/PPBP/FTH1/PGRMC1/B2M/TMSB4X/PKM/DYNLL1/MLH3/FLNA/GNAS/MYL12A/HLA-C/MYL6/TLN1/TAGLN2/ACTB/UBC/OAZ1
REACTOME_RNA_POLYMERASE_II_TRANSCRIBES_SNRNA_GENES	78	0.446825	1.58205	0.00707607	0.0263689	0.0147764	5046	tags=38%, list=18%, signal=32%	TAF13/SNAPC1/NCBP2/PHAX/SUPT5H/SNAPC3/NABP1/SRRT/TAF9/GTF2E2/GTF2A2/TAF11/INTS13/POLR2G/POLR2K/POLR2C/SNAPC4/INTS12/INTS5/POLR2L/INTS4/POLR2I/POLR2D/POLR2H/POLR2F/SNAPC5/RNU11/GTF2B/POLR2B/POLR2E
MITSIADES_RESPONSE_TO_APLIDIN_UP	430	0.362067	1.58194	0.000347584	0.00296587	0.00166199	3758	tags=31%, list=13%, signal=27%	PDE3B/SQSTM1/ALOX5AP/TNFSF9/TIGAR/CHST2/AREG/SLCO4A1/IFRD1/C3AR1/IMPA1/SH2D2A/SAMSN1/GADD45A/IFIT1/ICAM1/RPS6KA2/FOXO1/POLR1E/ARF4/IFITM3/EZR/LDLR/TACC2/CBS/F2R/SUGCT/BDNF/GEM/JMJD6/NUDT9/PRPF4/GLA/PPP1R2/SP140L/ZNF274/HIST1H2BD/NAT9/NGRN/TOMM34/NLRP1/FOSL1/DUSP2/ATG12/RBMS1/PFKFB3/TPBG/NR1D1/TOR3A/STK17A/MIR22HG/DUSP1/FOSB/CTSB/SOCS1/LINC00869/HERPUD1/NEMF/NECAP1/OASL/DIABLO/PRKRIP1/HHLA3/C16orf…
YAMAZAKI_TCEB3_TARGETS_UP	155	0.403188	1.58087	0.0019305	0.0103095	0.00577714	2915	tags=29%, list=10%, signal=26%	PLOD2/SRGN/SUSD2/MFGE8/SNAI1/COL4A2/P4HA1/KDELR3/PTPRM/PLOD1/SERPINH1/TCERG1/ARF4/PSAP/VEGFA/F3/B2M/LAMB1/RCN1/SFMBT2/COL4A1/CALU/P4HB/RRBP1/PRPF38B/HERPUD1/PSPH/NR4A1/INTS6L/IGFBP4/FUT8/P4HA2/ITGB1/ZYX/THBD/CYP26A1/TFPI/SRPRB/DDAH1/FKBP9/PLAT/PXDN/GNAS/LAMC1/YAF2
REACTOME_TAK1_ACTIVATES_NFKB_BY_PHOSPHORYLATION_AND_ACTIVATION_OF_IKKS_COMPLEX	31	0.533343	1.5808	0.0225718	0.0608009	0.0340711	7133	tags=55%, list=25%, signal=41%	SAA1/IKBKG/NKIRAS1/NFKB2/MAP3K7/IRAK2/RPS27A/UBC/UBE2V1/UBA52/UBE2N/NFKBIB/CHUK/RELA/APP/NFKBIA/S100A12
ENK_UV_RESPONSE_EPIDERMIS_UP	287	0.375721	1.5795	0.000314961	0.00296587	0.00166199	3155	tags=32%, list=11%, signal=28%	SERPINA1/S100A8/KRT16/TIGAR/CHST2/VLDLR/BNIP3/AKR1B10/FTH1/ME1/POLR3G/CYP27B1/TNC/AR/IFITM3/SRSF7/PGF/CMAHP/TP53I3/GCLM/CSTF2/ANGPTL4/HK2/HIST1H2BD/MKKS/CDC20/TPD52L2/GALNT6/SP110/PSME3/PIM2/SCO2/TNFRSF10B/SPG7/BCL2L1/RAB31/TYMS/PROCR/SLC25A15/CTSB/AIMP2/ULBP2/CSF1/RWDD2B/OASL/FXYD5/PRMT5/ANP32A/EHMT2/CMAS/ARHGDIB/MAP4K4/HDAC1/ZYX/SRM/OSMR/ATIC/RUVBL2/PFKP/ADSL/PSMA5/EIF2B2/FLNA/SURF2/PRDX3/MAP3K…
ROVERSI_GLIOMA_COPY_NUMBER_DN	46	0.4928	1.5785	0.0154541	0.0461812	0.0258786	2093	tags=22%, list=7%, signal=20%	KYNU/ZEB2/ADAM12/CES1/UROS/BCCIP/SFMBT2/HERPUD1/COQ3/TAF3
REACTOME_REGULATION_OF_TNFR1_SIGNALING	32	0.529454	1.57849	0.0228206	0.0613092	0.0343559	5589	tags=50%, list=20%, signal=40%	BIRC3/IKBKG/CASP8/TNFAIP3/TNFRSF1A/RIPK1/USP2/TRAF2/RBCK1/RPS27A/UBC/TRADD/RNF31/XIAP/UBA52/TAX1BP1
REACTOME_INFECTIOUS_DISEASE	369	0.366195	1.57789	0.000335233	0.00296587	0.00166199	7093	tags=47%, list=25%, signal=36%	TAF13/TXNRD1/TAF7/LIG4/AP2M1/ELOA/B2M/RPS27L/PSMB8/CCNH/PSMC5/NCBP2/PSME3/TAF12/GTF2H2/KPNA2/GRB2/ERCC2/SUPT5H/SEH1L/LTF/HLA-A/PSMB10/CHMP7/TAF9/ANTXR2/HSPA1A/PSMA6/ISG15/FEN1/GTF2E2/PSMC4/PSMB9/AP2A1/SLC25A4/CLTA/AP1S1/NUP54/GTF2A2/ANTXR1/PSMD10/TAF3/NUP62/STX1A/ELOC/PSME2/UBAP1/PSMA5/PSMD7/PSMD13/TAF11/PSMB5/HSP90AA1/AP1M1/HBEGF/PSMD11/CHMP4A/HSP90AB1/POLR2G/NUP35/POLR2K/PSME1/AP2S1/POLR2C/NUP4…
GAVIN_FOXP3_TARGETS_CLUSTER_P6	87	0.436359	1.57752	0.00713921	0.0265443	0.0148747	5142	tags=38%, list=18%, signal=31%	IFI44/SERPINA3/ICAM1/AR/AURKA/PDCD1LG2/CDC20/TYMS/TNFRSF9/TGFBR2/CLSPN/HIST1H1C/TMEM38B/PBK/AC055839.2/TPX2/SLC39A4/KIF2C/TPI1/ODC1/CENPK/TKTL1/CDK1/CKS1B/IGF2BP3/SPAG5/CCNB1/EBI3/BIRC5/FIGNL1/CDCA8/ATF6/SPC25
SHIN_B_CELL_LYMPHOMA_CLUSTER_8	34	0.521302	1.57743	0.020862	0.0570999	0.0319972	4363	tags=38%, list=15%, signal=32%	MAFB/SNAI1/ICAM1/IL1R2/IL21R/STAT1/HDAC1/FAS/GNAS/H2AFX/LYN/CCNB1/NBN
REACTOME_METABOLISM_OF_FAT_SOLUBLE_VITAMINS	43	0.497465	1.57743	0.0171563	0.0497292	0.0278668	1971	tags=30%, list=7%, signal=28%	AKR1C1/SDC3/AKR1C3/GPC6/AKR1B10/LDLR/RDH11/SDC2/GPC1/VKORC1/LRP8/UBIAD1/LRP12
HAHTOLA_MYCOSIS_FUNGOIDES_SKIN_UP	166	0.399057	1.5771	0.00139704	0.00807946	0.0045275	5268	tags=39%, list=18%, signal=32%	IGFBP3/CFH/IL7R/P4HA1/ACKR1/MGAT2/TM4SF1/DENND5A/SRRM1/SNX6/ITPR1/EIF3A/CASP1/CUTC/UPF2/RGS5/CCDC85B/SART3/BACE2/ATG12/CCNB1IP1/SAFB2/TNFRSF1A/NSL1/TXNDC5/SRSF3/UBE2Z/MAP4K4/LIPT1/SNCA/SREK1/BUD23/RBM25/FLNA/MARCKS/NDUFA8/YTHDF1/SMS/NME3/GEMIN6/THYN1/SSR2/CNN3/NME7/PWP1/SUPT16H/SRSF9/SLA/ARPC1A/CLEC4A/APEX1/ERH/CTBP1/TRAK2/UBE2V1/TMEM248/RCBTB2/EIF1/CKLF/REX1BD/DAB2/PSMB3/SNRNP70/PFN1/LAMP1
ACEVEDO_NORMAL_TISSUE_ADJACENT_TO_LIVER_TUMOR_DN	343	0.367513	1.5768	0.000326264	0.00296587	0.00166199	5211	tags=35%, list=18%, signal=29%	ABCC2/CD99L2/PCOLCE2/SLC25A22/DGAT2/DNAJA1/HSD3B7/CEMIP2/CAPN5/PNP/ENTR1/LDLR/ATF5/CBS/ERLIN1/KHDRBS3/ZNF330/POLE3/COQ10B/CAPN6/DMAC2/TBL1X/ABHD6/DECR2/IMP4/REEP6/SLC25A15/TEF/CTSB/MEPCE/CYGB/PAM16/AARS/MIEF1/DESI1/ZFAND2A/TNFRSF1A/SERBP1/LONP1/TMEM97/CHCHD10/NNMT/NUDT5/NOCT/TGDS/IGFBP4/CMAS/PYROXD2/ABHD10/MYL6B/BET1L/NUP62/MYDGF/SRPRB/SLC25A1/GNPTG/UBAP1/PAFAH2/CYB5B/EIF4A1/MACROD1/MLLT3/FGFRL1/…
HELLER_HDAC_TARGETS_DN	279	0.375866	1.57639	0.000310366	0.00296587	0.00166199	3776	tags=33%, list=13%, signal=29%	HMOX1/LAPTM5/TNFRSF10D/ZEB2/SLC7A11/PMAIP1/PSAT1/GADD45A/SERPINH1/CLIC2/CCND1/SNTB1/RIPOR2/DNAJC2/RRS1/ATF3/FABP5/EMC1/FMNL1/SRSF7/GTSE1/PATZ1/XBP1/VARS/PAK1IP1/CBS/DNAJB4/PNO1/ZMYND8/NOP56/PPRC1/NOP16/SLC19A1/CHAC1/RRP15/EMP3/PPIF/DNAJB9/TIMM44/SORD/BCL2L1/TYMS/PUS1/SELPLG/GALNT14/IL21R/BAG3/HSPD1/PSMB10/HERPUD1/PSPH/LRP8/PHF11/HSPA1A/CLEC2B/NOL12/MRTO4/CTPS1/HSPH1/QPCT/APOBEC3B/SUMO3/ARHGDIB/AT…
BOSCO_TH1_CYTOTOXIC_MODULE	80	0.442706	1.57536	0.00735294	0.0271411	0.0152091	5476	tags=36%, list=19%, signal=29%	HS3ST3B1/IL15RA/STAT4/APOL3/RGL1/ATF5/F2R/STRIP2/PRKCQ/TYMS/SOCS1/SMOX/ISG15/GNLY/GAS6/ADAM19/CERS4/P2RX5/USP18/DPCD/RHBDF2/MYBL1/CDC7/SLA2/BCL2/BATF2/CD163L1/F13A1/TNFSF18
REACTOME_N_GLYCAN_TRIMMING_IN_THE_ER_AND_CALNEXIN_CALRETICULIN_CYCLE	35	0.517409	1.57505	0.0208524	0.0570999	0.0319972	5869	tags=51%, list=21%, signal=41%	EDEM2/MLEC/TRIM13/VCP/UGGT1/NGLY1/UGGT2/RPS27A/PRKCSH/MOGS/EDEM3/UBC/CALR/MAN1B1/DERL2/UBA52/EDEM1/UBXN1
MASSARWEH_RESPONSE_TO_ESTRADIOL	61	0.465064	1.57483	0.0102489	0.0338313	0.0189581	2397	tags=33%, list=8%, signal=30%	STC1/SYBU/PMAIP1/AREG/PRSS23/SLC26A2/TSKU/SERPINA5/ETNK2/GLA/MAPT/APTX/SMPDL3B/IRS1/IGFBP4/KLF10/GREB1/CA12/CDV3/RHOBTB3
WAKABAYASHI_ADIPOGENESIS_PPARG_BOUND_36HR	29	0.53789	1.5736	0.0269475	0.0688308	0.0385708	4003	tags=41%, list=14%, signal=36%	LGALS3BP/MDM2/CUEDC1/ALDH9A1/TOB1/PLOD3/ACYP2/TRIT1/DISP2/OXSM/NGLY1/MTOR
KEGG_ARACHIDONIC_ACID_METABOLISM	47	0.489493	1.57262	0.0157218	0.0467528	0.0261989	681	tags=15%, list=2%, signal=15%	ALOX15B/GGT5/AKR1C3/TBXAS1/GPX3/CBR1/PTGS2
TONKS_TARGETS_OF_RUNX1_RUNX1T1_FUSION_MONOCYTE_UP	196	0.389291	1.57256	0.000848656	0.00546974	0.00306509	4165	tags=41%, list=15%, signal=36%	IFI44L/IFI44/AKR1C3/FAM136A/FERMT2/FAM216A/SLCO4A1/GBP1/FGFR1/GDF15/IFIT1/MYRF/TM4SF1/GOSR2/CBS/TRIP6/TP53I3/NCLN/NOP56/RRP9/ESF1/GTPBP4/CALU/LGALS9/SORD/PUS1/SEH1L/HSPD1/DKC1/CSF1/DDX24/WDR43/ISG15/MYBBP1A/UBA5/TCP1/CTPS1/EIF3B/RAB13/NOLC1/FASTKD1/TRMU/SELENOP/MT1X/TFPI/TRIB3/PFKP/AK2/PA2G4/ARL4A/SLC39A7/SMARCA4/ECHS1/PSMB5/NME1/PXDN/MRPS35/DNAAF2/EBNA1BP2/EPRS/FJX1/PES1/MTX1/PWP1/CENPX/USP18/MR…
LEI_MYB_TARGETS	318	0.369908	1.57242	0.000323729	0.00296587	0.00166199	3104	tags=30%, list=11%, signal=27%	KRT14/HMOX1/VIM/SRGN/S100A8/SERPINE2/KRT16/CDKN1A/AKR1C1/LGALS3BP/S100A9/SAA1/CXCL8/TGM2/PLK2/TGFBI/IL1B/MUC1/PRSS23/TXNRD1/ME1/TNFAIP6/FN1/DNAJA1/TNIP1/FLOT1/ACTA2/MMP15/FAP/SAT1/CD59/CCND1/IFITM2/PNP/TM4SF1/AURKA/SLC16A3/SELENBP1/STIP1/XBP1/TRIP6/FARSA/LAMB1/FADS1/GNG11/RAC3/ERCC1/SNRPN/ALAS1/PTX3/ELOVL5/IFI27/DAXX/RARS/PRPF6/HSPD1/HSPA4/SERPINB2/SERBP1/ZFP36L2/CKS2/NNMT/KRT8/HSPA1A/ISG15/IFITM…
MARTORIATI_MDM4_TARGETS_NEUROEPITHELIUM_UP	164	0.398396	1.57177	0.00139938	0.00807946	0.0045275	3378	tags=27%, list=12%, signal=24%	SERPINE2/PROS1/CDKN1A/PMAIP1/PLK2/SNAI1/AEN/P4HA1/BNIP3/EGLN3/CCND1/TIMM17A/GALK1/ID1/VEGFA/SLC16A3/SYNM/GTSE1/BAX/HK2/PGK1/PGM1/CCDC58/ENO1/FBN2/FAM162A/EDA2R/LDHA/PRTG/ZMAT3/PFDN2/DUSP5/DDIT4/ENG/PFKP/MAP3K20/SLC39A7/TPI1/PTP4A3/GRHPR/ERO1A/POLR2K/PIEZO1/BLOC1S2/NME4
SWEET_LUNG_CANCER_KRAS_UP	422	0.360723	1.57174	0.000349528	0.00296587	0.00166199	3089	tags=26%, list=11%, signal=23%	IGFBP3/SERPINE2/CDKN1A/ROS1/LRG1/LAPTM5/ALDOC/TNFSF9/PTGR1/PON2/AREG/TGFBI/PSAT1/GLRX/MUC1/NFIL3/SFTPB/ME1/GADD45A/HEXA/SAT1/MAPRE1/CCND1/HIF1A/GAPDH/TGOLN2/PSAP/HIBADH/XBP1/CYB5R1/NR2F1/ZDHHC6/ADSSL1/F3/RDH11/CTSA/G6PD/TSR1/ACSL4/GOLM1/PHLDA2/MAN1A1/HK2/CYBA/PGK1/WLS/TM2D2/RIDA/IL13RA2/GNE/LAP3/PHLDA1/PRNP/B3GAT3/ACSL5/RRBP1/REEP6/ENO1/NDUFAF4/CTSB/PKM/MLEC/FAM162A/TOB1/FAM49B/POLR1C/LDHA/NABP1/…
BASSO_HAIRY_CELL_LEUKEMIA_UP	67	0.455889	1.57155	0.00939431	0.032155	0.0180188	1902	tags=31%, list=7%, signal=29%	IGFBP3/PLOD2/SDC3/DPYD/IL1R1/FGFR1/PRSS23/MFAP5/PTPRM/SUSD5/CCND1/FGF2/CYB5R1/DLC1/B2M/VAMP3/IL1R2/TNFRSF1A/RECK/PLXNC1/RAB13
REACTOME_ATF4_ACTIVATES_GENES_IN_RESPONSE_TO_ENDOPLASMIC_RETICULUM_STRESS	26	0.551467	1.5712	0.026616	0.068172	0.0382016	5132	tags=54%, list=18%, signal=44%	CXCL8/ATF3/EXOSC4/HERPUD1/EXOSC9/EXOSC2/EXOSC3/ATF4/DDIT3/EXOSC8/EXOSC5/EXOSC6/EXOSC1/ATF6
DEMAGALHAES_AGING_UP	49	0.483467	1.568	0.0150466	0.0454068	0.0254447	2838	tags=33%, list=10%, signal=29%	C3/LAPTM5/S100A4/MT1F/RASA3/B2M/MGST1/PTGES3/HIST1H1C/S100A6/C4A/CLIC4/ANXA5/EFEMP1/PSMD11/MSN
SESTO_RESPONSE_TO_UV_C1	73	0.446287	1.56521	0.00820896	0.0293451	0.0164442	4463	tags=48%, list=16%, signal=41%	SAA2/CDKN1A/COPS8/SOD2/BNIP3/IFIT1/TNIP1/TM4SF1/TNFAIP3/IER2/RAB5IF/VDAC2/SERPINB2/FAM50A/PSMA6/PEA15/DUSP5/HDAC1/DDX1/C11orf58/PSMA5/NAMPT/HSP90AA1/CCN2/TGM1/CNN3/CXorf40A/SRSF2/SNRPA1/ETF1/SPRR2A/PPP2CA/ATP1B1/TBCC/PSMC2
ONO_AML1_TARGETS_DN	31	0.528023	1.56503	0.0243958	0.0642437	0.0360003	4136	tags=32%, list=15%, signal=28%	ADGRE5/RUNX2/SOCS3/IGFBP4/CREM/SLFN12/TNFRSF25/IL17RA/ITGAE/CXCR4
SERVITJA_ISLET_HNF1A_TARGETS_UP	144	0.403212	1.5646	0.00244101	0.012067	0.00676202	3649	tags=29%, list=13%, signal=26%	VIM/C1S/SERPINE2/LAPTM5/FBN1/TIMP2/TGM2/SERPINH1/ABCC3/IFITM2/GALK1/IFITM3/ATF3/IFIT2/PLCB4/NR2F1/RBMS3/RAB6B/CYBA/EPHA5/GBP3/PROCR/ASS1/BGN/CSF1/SEPT4/PTPRO/HTRA1/ARHGDIB/SNCA/AC074143.1/EFEMP1/STK17B/RHOC/MSN/SERPINB1/BLVRB/PLXND1/CACNA2D3/STMN2/STXBP5L/EPB41L2
MARSON_FOXP3_TARGETS_UP	59	0.464483	1.56456	0.0133236	0.0414333	0.023218	2611	tags=22%, list=9%, signal=20%	VIM/PDZK1IP1/EPHX1/PNP/PSMB8/STK10/ARHGAP9/SH3BGRL/S100A6/BASP1/DDIT4/CYB5A/CSNK1D
PRAMOONJAGO_SOX4_TARGETS_UP	51	0.478127	1.56428	0.0133588	0.0415004	0.0232556	3303	tags=39%, list=12%, signal=35%	RIT1/STC1/SOD2/BNIP3/IL1B/NFIL3/GDF15/VEGFA/TNFAIP3/DUSP4/STC2/TPBG/JUN/IER3/BTN2A1/TRIB3/SMNDC1/PHF1/TNIP2/ZFP36L1
SAGIV_CD24_TARGETS_DN	44	0.492653	1.56422	0.0168446	0.0491217	0.0275264	2597	tags=43%, list=9%, signal=39%	CDKN1A/CXCL8/GDF15/ICAM1/ATF3/PLAU/GEM/CHAC1/EMP3/RELB/PLPPR2/ULBP2/OASL/OGG1/DUSP5/APOBEC3B/SPHK1/RNF25/CTTN
REACTOME_CLEC7A_DECTIN_1_SIGNALING	97	0.425291	1.56318	0.00743018	0.0272945	0.0152951	6549	tags=52%, list=23%, signal=40%	IL1B/IKBKG/CASP8/PSMB8/ITPR1/PSMC5/PSME3/NFKB2/RELB/PSMB10/PSMA6/MAP3K7/PSMC4/PSMB9/PSMD10/PSME2/PSMA5/PSMD7/PSMD13/PSMB5/PSMD11/MAP3K14/PSME1/PSMA2/PSMA1/PSMC3/UBE2M/RPS27A/PSMD2/SKP1/UBC/PSMD4/PSMC2/PSMB6/PSMA7/UBE2V1/PSMD12/PSMD14/PSMB4/UBA52/PSMB3/PSMA3/UBE2N/PSMC6/PSMB7/PSMB1/UBA3/CHUK/PSMB2/RELA
HOSHIDA_LIVER_CANCER_SURVIVAL_DN	101	0.422406	1.56283	0.00746845	0.0273527	0.0153277	3587	tags=31%, list=13%, signal=27%	PROS1/AOX1/IMPA1/ARF4/AR/SELENBP1/ATP6AP2/ALDH9A1/TIMM8A/ALAS1/ACOT2/TDO2/AARS/TMEM97/PON3/CPOX/NAAA/PCYT2/GGCX/ADH5/CYB5A/EIF2B1/CCT8/POLRMT/HMGCL/DOCK4/PLCB3/TXN2/GRK4/HSPE1/SRSF2
DACOSTA_UV_RESPONSE_VIA_ERCC3_TTD_UP	56	0.468408	1.56257	0.013269	0.0413474	0.0231699	4433	tags=46%, list=16%, signal=39%	PVR/EPHX1/SAT1/GALK1/PCDH9/PGF/PPIF/ERCC2/STAT1/TRIM21/BUD23/FLNA/PLD3/GLS/MRPS12/UBL4A/BAK1/MVD/PLCB3/ADO/MPDU1/PDLIM7/MRPL28/STK25/CALR/FKBP2
KEGG_P53_SIGNALING_PATHWAY	67	0.453122	1.56201	0.0108776	0.0354856	0.0198851	1427	tags=21%, list=5%, signal=20%	IGFBP3/CDKN1A/PMAIP1/GADD45A/MDM2/CCND1/CASP8/GTSE1/TP53I3/BAX/TNFRSF10B/CCND3/RRM2B/CYCS
REACTOME_FORMATION_OF_INCISION_COMPLEX_IN_GG_NER	43	0.492245	1.56088	0.0188014	0.052879	0.0296319	5894	tags=40%, list=21%, signal=31%	UBE2V2/CCNH/ERCC1/GTF2H2/PARP2/ERCC2/SUMO3/RPS27A/UBC/CUL4A/GTF2H5/RBX1/CHD1L/GTF2H1/UBA52/SUMO2/UBE2N
CAVARD_LIVER_CANCER_MALIGNANT_VS_BENIGN	25	0.553787	1.56018	0.0311111	0.0767123	0.0429874	4014	tags=48%, list=14%, signal=41%	AKR1C1/PTGR1/DPYD/FTH1/CES1/PRDX1/CD14/MRFAP1/HLA-C/MYL6/MALAT1/ACTB
GRAHAM_CML_DIVIDING_VS_NORMAL_QUIESCENT_DN	86	0.432259	1.56011	0.00914402	0.0315098	0.0176572	2837	tags=35%, list=10%, signal=32%	AKR1C3/CXCL8/SOD2/BIRC3/HIST1H2AC/AREG/IL1B/LIMCH1/CD59/CXCL1/CTSO/TM4SF1/PCDH9/CXCL2/TRIM22/CXCL3/VNN1/IL18R1/TPBG/MIR22HG/CLEC2B/TNFSF4/CREM/TSPAN31/TFPI/HIST2H2BE/PTGER4/ANXA5/MLLT3/ADAM28
REACTOME_DNA_REPLICATION	125	0.409161	1.55977	0.00448786	0.0186794	0.0104674	6503	tags=50%, list=23%, signal=39%	E2F3/MCM8/PSMB8/PSMC5/POLE3/PSME3/ANAPC7/PSMB10/PSMA6/FEN1/PSMC4/PSMB9/PSMD10/GINS3/PSME2/PSMA5/CDC26/PSMD7/PSMD13/PSMB5/PSMD11/PSME1/ANAPC4/PSMA2/GINS1/PSMA1/PSMC3/POLE4/RFC3/GINS4/RPS27A/PSMD2/SKP1/ORC6/POLD2/UBC/PSMD4/UBE2C/RBX1/PSMC2/ORC2/PSMB6/PSMA7/PSMD12/POLD1/CDC7/PSMD14/GMNN/PSMB4/DBF4/UBA52/PSMB3/PSMA3/ANAPC2/ANAPC5/ANAPC16/PSMC6/PSMB7/ANAPC11/ORC5/PSMB1/CDC6/PSMB2
LIU_COMMON_CANCER_GENES	61	0.46043	1.55914	0.011713	0.0375308	0.0210312	4302	tags=41%, list=15%, signal=35%	FGFR1/SFTPB/GTSE1/PGF/B2M/NOP56/PDF/SLC35E1/TMBIM4/DAP3/HAUS2/WRAP53/NUMBL/POLR1B/OCIAD1/HSPE1/INTS4/USP34/PRR11/TLE1/SLFN5/PCLAF/SERP1/DDX27/LARS
LEE_AGING_CEREBELLUM_UP	66	0.452912	1.55905	0.0108188	0.0353487	0.0198084	3311	tags=30%, list=12%, signal=27%	HMOX1/LGALS3BP/IMPA1/FOS/SIPA1L2/B2M/GNG11/BDNF/GBP3/TYMS/SELPLG/NR4A1/PTPRO/AMH/HEXB/C4A/LMNB1/TGFBR3/EPRS/AGT
FUJII_YBX1_TARGETS_UP	41	0.496478	1.559	0.0195804	0.0545684	0.0305786	2417	tags=39%, list=8%, signal=36%	CFB/CDKN1A/MUC1/PAM/ACTA2/MVP/CLIC3/SLC16A3/TRIM22/LGALS9/TRIB2/NLRC5/POF1B/S100A6/SELENOP/FAS
GUENTHER_GROWTH_SPHERICAL_VS_ADHERENT_DN	26	0.547055	1.55863	0.0295236	0.0737647	0.0413356	2928	tags=54%, list=10%, signal=48%	NQO1/PRSS23/FN1/CD59/MVP/CASP1/NRP1/PLAUR/TGFBR2/CCND3/ITGB1/ANXA5/GAA/CD46
REACTOME_CONDENSATION_OF_PROPHASE_CHROMOSOMES	65	0.453995	1.55782	0.0108241	0.0353487	0.0198084	4252	tags=28%, list=15%, signal=24%	HIST1H2AC/HIST1H2BK/HIST2H2AA4/HIST1H3G/HIST1H2BG/HIST1H2BD/HIST2H4A/HIST1H2BN/HIST2H2BE/SMC4/HIST1H3H/H2AFX/HIST1H2BJ/CDK1/H2AFZ/CCNB1/SET/HIST1H2BC
NAKAMURA_TUMOR_ZONE_PERIPHERAL_VS_CENTRAL_UP	276	0.371783	1.55706	0.00031027	0.00296587	0.00166199	3951	tags=37%, list=14%, signal=32%	CCDC80/IL7R/LINC00460/TGFBI/SRXN1/PRSS23/GPATCH4/MFAP5/ME1/MAP1B/FN1/IKBKG/COL12A1/LTBP1/FBLIM1/PNP/CLN8/EZR/MRPL42/F3/DPH3/EIF2S1/BDNF/AATF/NOP2/COL4A1/PSME3/ADAMTS1/LINP1/IGFL1/RAB5IF/SHCBP1/PDF/MGST1/CCDC58/C9orf85/KPNA2/CMTM3/CCT2/HMGA2/PUS1/STK17A/PSMC3IP/CYGB/INF2/STUB1/CHAC2/DKC1/LRP8/NUDT5/PBK/PSMA6/TUBA1C/SUGT1/POMP/PODXL/PEA15/GLRX2/CTPS1/RABEPK/APOBEC3B/EIF5/CMTM7/ADAM19/ATG3/MYEOV/PSM…
REACTOME_DUAL_INCISION_IN_GG_NER	41	0.495637	1.55635	0.0198135	0.0548925	0.0307602	5083	tags=41%, list=18%, signal=34%	POLE3/ERCC1/GTF2H2/PARP2/ERCC2/POLE4/RFC3/RPS27A/POLD2/UBC/CUL4A/GTF2H5/RBX1/POLD1/CHD1L/GTF2H1/UBA52
TURASHVILI_BREAST_LOBULAR_CARCINOMA_VS_DUCTAL_NORMAL_UP	64	0.454407	1.55604	0.0117388	0.037574	0.0210554	2495	tags=25%, list=9%, signal=23%	COL8A1/ZEB1/IFI44/LOX/FBN1/ADAM12/FN1/COL12A1/LAMB1/GPX8/SSR1/BGN/PLXNC1/RAP2C/HSPA6/PRC1
LEE_LIVER_CANCER_CIPROFIBRATE_DN	50	0.478265	1.55597	0.015554	0.046389	0.0259951	1464	tags=20%, list=5%, signal=19%	KYNU/AKR1C1/DMBT1/HSD11B1/SELENBP1/CMAHP/ETNK2/NR1H3/TNFRSF10B/WNT10B
VECCHI_GASTRIC_CANCER_EARLY_UP	429	0.356375	1.55568	0.000349895	0.00296587	0.00166199	4679	tags=37%, list=16%, signal=31%	PDZK1IP1/CXCL8/SOD2/CSPG5/IFI6/C8orf33/POP1/GDF15/TRMT6/IL15RA/BYSL/TIMM17A/IFITM2/CXCL1/HSPA8/RRS1/IFITM3/CLN8/TM4SF1/AURKA/GTSE1/NUDT6/ZWINT/VARS/PGRMC1/CXCL3/PSMB8/DCAF13/APEX2/STRIP2/NOP56/NOP16/NCBP2/AATF/PRPF4/SGO2/CDC20/LIF/GTPBP4/FOSL1/BMS1/SNHG4/STAMBPL1/ENO1/ASS1/CTSB/ANP32E/LYAR/AIFM2/CDCA2/BUB3/RBM26/DKC1/MZT1/LRP8/CKS2/NTPCR/PBK/FAM50A/ISG15/MRPS10/IFITM1/S100A6/NSUN5/FEN1/PRMT1/MRTO…
REACTOME_TNF_SIGNALING	42	0.493609	1.5553	0.0199671	0.0550713	0.0308604	5083	tags=40%, list=18%, signal=33%	BIRC3/IKBKG/CASP8/TNFAIP3/TNFRSF1A/MAP3K7/FADD/RIPK1/USP2/TRAF2/RBCK1/RPS27A/UBC/TRADD/RNF31/XIAP/UBA52
TAKEDA_TARGETS_OF_NUP98_HOXA9_FUSION_8D_UP	139	0.402286	1.5552	0.0026976	0.0129586	0.00726165	3411	tags=30%, list=12%, signal=27%	IFI44L/IFI44/LGALS3BP/IFIT3/CHST2/HS3ST3B1/IFI6/GBP1/PRSS23/GDF15/TNFAIP6/IFIT1/PCDH9/IFIT2/DLC1/F2R/PTGS2/BDNF/SDSL/CCDC71L/IFI27/STAT1/ZNF503/ADGRA2/ISG15/IFITM1/CLEC2B/C3orf80/IGFBP4/EPSTI1/RXFP1/DDIT4/PALLD/CAVIN2/KLF1/DDX60/TSC22D1/CMBL/HIC1/USP18/ADRB1/REXO2
REACTOME_METABOLISM_OF_NON_CODING_RNA	54	0.469897	1.5551	0.0144023	0.0439119	0.024607	3971	tags=39%, list=14%, signal=34%	NCBP2/GEMIN5/PHAX/SEH1L/PRMT5/SNUPN/GEMIN4/SMN1/NUP54/NUP62/GEMIN2/SMN2/TGS1/GEMIN6/NUP35/NUP43/SNRPE/DDX20/WDR77/NUP93/GEMIN7
REACTOME_EUKARYOTIC_TRANSLATION_INITIATION	117	0.411274	1.55479	0.0060241	0.0234228	0.0131255	8783	tags=68%, list=31%, signal=47%	RPS27L/EIF2S1/EIF3A/EIF4E/EIF3J/EIF2B3/EIF3B/EIF3G/EIF5/EIF2B1/EIF2B2/EIF4A1/EIF5B/EIF3D/EIF2S2/RPS12/EIF3E/RPL9/RPS27A/RPS10/RPS20/EIF4G1/EIF3M/RPL24/RPL35A/RPLP1/RPL17/RPL8/EIF2B4/RPS26/RPS3/RPL13A/FAU/UBA52/RPS3A/RPS19/EIF3C/RPL26L1/RPS28/RPS23/RPL38/RPL41/RPS9/RPSA/RPS6/RPL31/RPS2/RPL27A/RPL5/RPS24/RPS17/RPL34/RPL36AL/RPS25/EIF4A2/RPL11/RPS21/RPS29/EIF2B5/RPS5/RPL13/RPLP2/RPLP0/RPL22/RPL32/RP…
LU_EZH2_TARGETS_UP	276	0.371093	1.55417	0.00031027	0.00296587	0.00166199	5540	tags=40%, list=19%, signal=33%	TRIM16L/AKR1C2/SOD2/IFIT3/OSBPL5/PRSS23/IFIT1/HABP4/FLOT1/S100A4/UBE2L6/TM4SF1/CLIC3/IFI35/TRIP6/CBR1/ZCCHC24/PSMB8/GCHFR/SIGIRR/TLCD1/CYB561D2/TRAPPC12/TOR3A/CCDC32/IFI27/WDR74/STUB1/PSMB10/LONP1/IER3/OASL/HYAL2/VOPP1/TMEM30A/ISG15/OGG1/MSRB3/ALKBH2/S100A6/CFD/ODF2/PHF5A/PSMB9/NOLC1/AP1S1/HDAC1/MYL6B/GATD3A/DDIT4/ADAMTS4/TRIB3/ZNF814/CCDC107/MGMT/SURF2/CASP7/AHSA1/RPS19BP1/STYXL1/BST2/NDUFA8/ACO…
TAKAO_RESPONSE_TO_UVB_RADIATION_UP	84	0.432254	1.55408	0.01059	0.0346582	0.0194215	7736	tags=65%, list=27%, signal=48%	PMAIP1/FTH1/S100A4/SAT1/CCDC85B/IER2/CLP1/TXN/ATP6V0B/PIGH/CDC37/DYNLL1/PSMA6/TCP1/GRN/PRDX3/MSN/BAK1/EEF1D/PFDN5/TSC22D1/GPS2/SAP18/H2AFZ/POLR2L/COX7A2/UBC/ATP5MC3/PPP1R11/COX5B/MANF/SNRPF/MRPL49/NDUFA4/NAP1L1/SELENOW/UQCRFS1/NXF1/RPS28/UBXN1/RPS9/SOD1/COX7B/DBI/RPL27A/GPX1/RPS25/SEM1/COX4I1/RPS5/COX6C/RPLP0/ERCC5/UBB/RPL21
REACTOME_ANTIGEN_PRESENTATION:_FOLDING_ASSEMBLY_AND_PEPTIDE_LOADING_OF_CLASS_I_MHC	25	0.551302	1.55318	0.0324444	0.0784822	0.0439792	4377	tags=40%, list=15%, signal=34%	B2M/HLA-B/TAP2/HLA-A/ERAP2/SAR1B/HLA-C/TAP1/CALR/HSPA5
LI_INDUCED_T_TO_NATURAL_KILLER_UP	278	0.370071	1.55285	0.000308261	0.00296587	0.00166199	2877	tags=23%, list=10%, signal=21%	VIM/SERPINE2/CDKN1A/LGALS3BP/SERPINA3/FTL/TNFRSF10D/GRAMD1B/MLKL/F2RL2/HSD11B1/GLRX/NFIL3/SLC2A6/PLEKHO2/S100A4/SAMD9L/IFITM2/MVP/IFITM3/FAM129B/SLAMF7/XBP1/GCNT2/F2R/BATF3/GPC1/GOLM1/CASP1/HK2/IL18R1/DHRS11/RBMS1/ARL6IP5/RIOX2/GLIPR2/BAG3/TNFRSF9/DYRK3/AQP9/HIST1H1C/IER3/TMBIM4/IFITM1/TUBA1C/S100A6/GNG2/PEA15/DUSP5/COTL1/LRP12/MED10/CXCR5/TNFRSF11B/UAP1L1/SLC39A4/TMEM126A/PRR7/MSMO1/IQGAP2/CD7/C…
SCHAEFFER_PROSTATE_DEVELOPMENT_AND_CANCER_BOX4_DN	32	0.520746	1.55253	0.0271565	0.0691915	0.038773	3883	tags=41%, list=14%, signal=35%	CTSO/SSR1/EIF3A/IER2/ELOVL5/IER3IP1/TOB2/SYMPK/PRPF40A/LRPAP1/SFPQ/SRSF9/NFIA
GRUETZMANN_PANCREATIC_CANCER_UP	338	0.362629	1.55249	0.00064704	0.00456799	0.00255977	2962	tags=27%, list=10%, signal=24%	PLOD2/SERPINA1/SRGN/KYNU/IFI44L/COPS8/LAPTM5/GGT5/ALDOC/DPYD/BIRC3/FBN1/AREG/WNT5A/P4HA1/GBP1/TXNRD1/GADD45A/TNFAIP6/FN1/SERPINH1/DNAJA1/FAP/LTBP1/IFITM2/PNP/FABP5/GNPDA1/PLAU/CBR1/CASP4/TNFAIP3/PTGS2/GPC1/ZMYND8/GEM/NCBP2/GDI1/CASP1/RCN1/PGK1/EMP3/PSME3/ARHGEF2/LOXL2/PLAUR/FLAD1/GRB2/TOP1/PRNP/RAB31/PRDX1/HCCS/NR1D1/ENO1/PKM/STAT1/IRS1/LDHA/CKS2/NNMT/PRR13/CTPS1/DUSP5/GRN/POLB/ARL6IP1/DGKD/MYL6B…
PANGAS_TUMOR_SUPPRESSION_BY_SMAD1_AND_SMAD5_DN	134	0.402192	1.55154	0.00397878	0.0170519	0.00955541	4879	tags=36%, list=17%, signal=30%	SERPINA3/QSOX1/HIF1A/ID1/CLN8/LDLR/SRSF7/MFSD2A/LARGE2/CBS/ERGIC2/NFKB2/MINDY3/HSPA13/NIPA2/TMX1/ANAPC7/FAM49B/LRP8/TMEM30A/MAP3K7/HM13/ARL6IP1/GREB1/DUSP9/SRPRB/MAX/TMED1/SLFN12/MUS81/FGFRL1/ALG12/RCE1/TMEM185B/OSGIN2/SDF2L1/MAPRE2/SUPT16H/UGCG/SUCO/SLC16A1/C11orf24/GREB1L/HAUS7/MRPS21/ARRDC4/WAPL/ZSWIM7
SHETH_LIVER_CANCER_VS_TXNIP_LOSS_PAM4	243	0.3753	1.55135	0.000305157	0.00296587	0.00166199	3455	tags=23%, list=12%, signal=21%	DCN/SERPINE2/DPYD/ZEB2/TGFBI/PCOLCE2/APOL3/HIBADH/RMDN3/CBS/SUOX/SUGCT/CUTC/RGS5/ALDH9A1/BLMH/PDK1/CFHR1/SAFB2/SLC25A15/ABI3BP/TMEM63A/RECK/PTPRO/PLXNC1/ZNF35/PRKAG2/DDC/SUCLG2/HEBP1/ACAD9/PECR/QDPR/NR1I3/CD320/NAT1/ACSL1/ACAD8/MACROD1/TFPT/EFEMP1/GSTO1/PAICS/SLC27A5/IDH1/SERPINB1/SLC47A1/GFER/ACAT2/TERF2IP/NTN1/DDX60/DPH7/RAB3A/DENND1A/ABHD3/ATAD3A
REACTOME_G2_M_CHECKPOINTS	162	0.393533	1.55043	0.00167364	0.00920441	0.00515789	5175	tags=37%, list=18%, signal=30%	UBE2V2/HIST1H2BK/GTSE1/MCM8/HIST1H2BG/PSMB8/PSMC5/HIST1H2BD/HIST2H4A/PSME3/YWHAG/CLSPN/PSMB10/PSMA6/PSMC4/PSMB9/BABAM2/PSMD10/HIST1H2BN/PSME2/PSMA5/HIST2H2BE/PSMD7/PSMD13/PSMB5/PSMD11/H2AFX/PSME1/PSMA2/PSMA1/HIST1H2BJ/PSMC3/CDK1/RFC3/BABAM1/CHEK2/RPS27A/PSMD2/YWHAB/RAD1/ORC6/CCNB1/UBC/PSMD4/HIST1H2BC/NBN/PSMC2/ORC2/PSMB6/PSMA7/SFN/PSMD12/CDC7/PSMD14/PSMB4/DBF4/UBA52/PSMB3/PSMA3/HIST1H4A
YAO_HOXA10_TARGETS_VIA_PROGESTERONE_UP	74	0.439334	1.54933	0.0094106	0.0321748	0.0180298	2511	tags=24%, list=9%, signal=22%	IGFBP3/PROS1/CDKN1C/ME1/ID1/CHERP/GEM/TNS2/LTF/CDH16/NR4A1/ATP1A2/CFD/GAS6/KLF10/THBD/TTC14/ARL4A
IVANOVA_HEMATOPOIESIS_EARLY_PROGENITOR	423	0.355338	1.54889	0.000348918	0.00296587	0.00166199	4948	tags=33%, list=17%, signal=28%	TIGAR/AKR1B10/GPATCH4/CCDC86/TMEM206/UFM1/UQCC1/MGAT2/PFAS/EXTL2/HIBADH/MRPS30/PATZ1/ZWINT/UMPS/SNAPC1/PLD6/SUGCT/DAPP1/PPAN/WDR12/PPRC1/PRPF4/MARS2/PPIF/SLC35B2/GBP3/ZNF787/DMAC2/C9orf85/RBM34/SMIM30/PRDX1/ELOVL5/SLC25A15/RIOX2/SLC4A8/MLEC/PINX1/AARS/PLEKHA4/TMEM201/PSMB10/SEC61A1/TRIM13/C16orf91/PRR3/SHISA2/SEPT6/RNASEH1/DDX31/ASRGL1/CUX1/DDX51/REXO5/VMA21/HSF2BP/NOLC1/GEMIN4/LRP12/EEF2KMT/POGL…
HELLER_HDAC_TARGETS_SILENCED_BY_METHYLATION_UP	424	0.354941	1.54773	0.000349162	0.00296587	0.00166199	2449	tags=22%, list=9%, signal=21%	C3/IGFBP3/CFH/C1S/SERPINE2/CDKN1A/SQSTM1/ALDOC/AKR1C3/CDKN1C/MAFB/FTL/BIRC3/FBN1/HIST1H2AC/PLK2/SNAI1/AREG/PDGFRL/NXN/TFRC/CSPG5/IFI6/FGFR1/TMOD1/IFIT1/FN1/HABP4/DBN1/S100A4/SAT1/TTLL1/RPS6KA2/RNF128/ID1/PSAP/PCDH9/DENND5A/SLC16A3/PGF/HIST1H3G/EFNB2/TRIP6/FOS/BIN1/ATP6AP2/G6PD/HIST1H2BG/PHLDA2/HIST2H4A/ACSBG1/MAPT/DUSP2/ATG12/DDAH2/PFKFB3/RRBP1/FGFR4/MIR22HG/DUSP1/IFI27/SLC4A8/EPHA3/NEU1/STAT1/DY…
REACTOME_INTERFERON_SIGNALING	175	0.388234	1.54692	0.00168919	0.00923021	0.00517235	4243	tags=34%, list=15%, signal=29%	IFIT3/IFI6/GBP1/IFIT1/ICAM1/PML/UBE2L6/IFITM2/IFITM3/IFIT2/TRIM22/IFI35/B2M/SOCS3/PSMB8/SP100/GBP3/EIF4E/HLA-B/KPNA2/UBA7/IFI27/SEH1L/SOCS1/STAT1/HLA-A/OASL/IRF9/ISG15/IFITM1/NUP54/TRIM21/IFI30/NUP62/PTPN1/EIF4E2/FLNA/EIF4A1/BST2/HLA-H/ABCE1/NUP35/NUP43/IRF3/HLA-C/IFNGR2/USP18/TRIM46/KPNA4/EIF4A3/FCGR1B/TRIM14/NUP93/RPS27A/UBC/PIN1/EIF4G1/KPNA5/CAMK2D
ICHIBA_GRAFT_VERSUS_HOST_DISEASE_D7_DN	36	0.504256	1.54583	0.0251947	0.0656936	0.0368128	258	tags=11%, list=1%, signal=11%	PAPSS2/NXN/OSBPL5/ME1
TARTE_PLASMA_CELL_VS_PLASMABLAST_UP	320	0.363165	1.54528	0.000322789	0.00296587	0.00166199	2189	tags=19%, list=8%, signal=18%	CFB/SERPINA1/S100A8/C1S/IFI44L/IFI44/MME/S100A9/SERPINA3/IL7R/CXCL8/ALOX5AP/FTL/BIRC3/FBN1/CHN1/PAM/HEXA/DLG4/CES1/TNC/ENO2/GPX3/IFITM3/PSAP/TRIM22/CBS/KCNQ1/FOS/FSTL1/CHERP/B2M/TNFAIP3/GPC1/NOP14-AS1/CYBA/COL4A1/NFKB2/ZNF787/RELB/HLA-B/LGALS9/SMPDL3B/PLCB2/HRH1/DUSP1/FOSB/STXBP1/WNT10B/HERPUD1/CSF1/NR4A1/IFITM1/IGFBP4/GRN/QPCT/RAB13/MMP16/RGS2/SNCA/HIST1H2BN/STX1A
REACTOME_AMYLOID_FIBER_FORMATION	90	0.425249	1.54526	0.00972613	0.0328861	0.0184285	4252	tags=29%, list=15%, signal=25%	SAA1/MFGE8/HIST1H2AC/TGFBI/UBE2L6/HIST1H2BK/HIST2H2AA4/HIST1H3G/B2M/HIST1H2BG/HIST1H2BD/HIST2H4A/LTF/TSPAN5/SNCA/HIST1H2BN/HIST2H2BE/HIST1H3H/H2AFX/NCSTN/HIST1H2BJ/PRKN/H2AFZ/RPS27A/UBC/HIST1H2BC
KAYO_AGING_MUSCLE_DN	120	0.407255	1.54356	0.00578035	0.0227936	0.0127729	1348	tags=20%, list=5%, signal=19%	UGP2/MED24/PTGR1/SOD2/PON2/DNTTIP2/VLDLR/BYSL/CASP4/EIF2S1/ZMYND8/ZNF274/PABPC4/ALDH9A1/VDAC2/PPP5C/MATN1/TOP1/AIMP1/HOXC5/TMSB4X/RARS/NIPA2/NEU1
PID_MYC_ACTIV_PATHWAY	77	0.436326	1.54323	0.0110553	0.035874	0.0201027	4401	tags=43%, list=15%, signal=36%	PMAIP1/SNAI1/TFRC/GPAM/GAPDH/E2F3/EIF2S1/BAX/EIF4E/TAF12/FOSL1/ENO1/RIOX2/HSPD1/HSPA4/LDHA/UBTF/TAF9/RUVBL2/MAX/EIF4A1/PRDX3/HSP90AA1/NME1/ODC1/RUVBL1/RCC1/POLR3D/CCNB1/EIF4G1/NDUFAF2/NBN/BIRC5
BIOCARTA_TNFR1_PATHWAY	28	0.5323	1.54271	0.0341474	0.0811267	0.0454611	4596	tags=46%, list=16%, signal=39%	CASP8/DFFA/JUN/TNFRSF1A/MAP3K7/ARHGDIB/FADD/RIPK1/LMNB1/TRAF2/TRADD/CRADD/PRKDC
TOOKER_GEMCITABINE_RESISTANCE_DN	123	0.404827	1.54143	0.00525072	0.0210856	0.0118158	2811	tags=29%, list=10%, signal=26%	PLOD2/PAPSS2/SLC7A11/TNFRSF6B/TFRC/PSAT1/HPCAL1/SERPINH1/PDGFC/EZR/PLIN3/SSR1/TAF1A/SLC39A14/TOP1/STK17A/CTSB/MLEC/GLRX2/P4HA2/MLPH/RGS2/MBD4/TRIB3/CYB5A/CYB5B/AHSA1/UBE2S/CLIC4/AVEN/WWTR1/GNL3/SRP72/CACYBP/SMS/LPCAT4
PECE_MAMMARY_STEM_CELL_UP	135	0.399521	1.54134	0.00371945	0.0161899	0.00907237	7823	tags=61%, list=27%, signal=44%	KRT14/KRT16/AKR1C1/SERPINA3/GAPDH/MT1F/SOCS3/ABHD6/TXN/BAG3/TMX2/DYNLL1/DDX24/KRT8/KARS/TALDO1/ATP5F1E/MT1X/MT1E/RPS19BP1/SMARCA4/CSTB/UBL5/NDUFAF8/EEF1D/UQCR11/GAS5/SELENOH/RPS12/TUBB4B/NDUFA6/TIMM8B/TUBB2A/SEC61G/NDUFB2/RPS10/RPS20/SNHG6/COX7A2/RPL24/RPL35A/RPLP1/TUBB2B/NOP53/RPL8/RPS26/RPS3/RPL13A/FAU/NDUFA11/UBA52/WFS1/NDUFS5/EDF1/RPS19/UQCRB/RPS28/EHD4/RPL41/RPSA/ATP5MG/GUCD1/HINT1/LAMTOR2/R…
KEGG_RIBOSOME	85	0.4277	1.54039	0.0113838	0.0367838	0.0206126	9190	tags=72%, list=32%, signal=49%	RPS27L/RPS12/RPL9/RPS27A/RPS10/RPS20/RPL24/RPL35A/RPLP1/RPL17/RPL8/RPS26/RPS3/RPL13A/FAU/UBA52/RPS3A/RPS19/RPL26L1/RPS28/RPS23/RPL38/RPL41/RPS9/RPSA/RPS6/RPL31/RPS2/RPL27A/RPL5/RPS24/RPS17/RSL24D1/RPL34/RPL36AL/RPS25/RPL11/RPS21/RPS29/RPS5/RPL13/RPLP2/RPLP0/RPL22/RPL32/RPS13/RPL36/RPL21/RPL7A/RPL23A/RPS16/RPL30/RPS8/RPL18/MRPL13/RPL26/RPL19/RPL4/RPS18/RPS11/RPS15
REACTOME_TNFS_BIND_THEIR_PHYSIOLOGICAL_RECEPTORS	26	0.540608	1.54026	0.0337732	0.0804907	0.0451047	2142	tags=31%, list=8%, signal=28%	TNFSF9/TNFRSF6B/TNFSF14/TNFRSF9/EDA2R/TNFRSF1A/TNFSF4/TNFRSF11B
CHESLER_BRAIN_HIGHEST_EXPRESSION	36	0.501908	1.53863	0.0258818	0.0667777	0.0374203	6128	tags=42%, list=22%, signal=33%	FTL/FOS/ACSL4/ATP6V0B/PRKCE/PSMB5/ZRANB2/PPID/MATR3/ACTB/KCTD12/LIN7C/UQCRB/CXorf56/HINT1
ZHENG_IL22_SIGNALING_DN	27	0.53354	1.53834	0.0340578	0.0809766	0.045377	2318	tags=33%, list=8%, signal=31%	PDE7B/IL1RL1/SLC9A2/SIPA1/BGN/ADGRA2/PRTG/CSPP1/ABCD2
GEISS_RESPONSE_TO_DSRNA_UP	38	0.49656	1.53826	0.0265283	0.0681582	0.0381939	1179	tags=34%, list=4%, signal=33%	SRGN/BNIP3/CHN1/GBP1/TNFAIP6/IFIT1/SAT1/FGF2/ATF3/SUOX/TNFAIP3/PLAUR/NMI
REACTOME_CLASS_A_1_RHODOPSIN_LIKE_RECEPTORS	200	0.379064	1.53762	0.00112835	0.0068507	0.00383893	2057	tags=14%, list=7%, signal=14%	C3/SAA1/PTGFR/CXCL8/PPBP/F2RL2/C5AR2/C3AR1/EDN2/ACKR1/CXCL1/FPR1/S1PR3/PSAP/CXCL2/CCL20/F2R/P2RY11/CXCL3/ECE1/HRH1/PTGIR/QRFPR/PLPPR2/APLN/ADORA2B/CXCR5/HEBP1/RXFP1
KIM_ALL_DISORDERS_CALB1_CORR_DN	26	0.539643	1.53751	0.0342205	0.0811743	0.0454878	4047	tags=35%, list=14%, signal=30%	S100A8/ANPEP/S100A4/ALDH3A1/APOBEC3C/SLC16A6/CCIN/GADD45B/ROR2
REACTOME_CYCLIN_A:CDK2_ASSOCIATED_EVENTS_AT_S_PHASE_ENTRY	85	0.426875	1.53742	0.0113838	0.0367838	0.0206126	5167	tags=47%, list=18%, signal=39%	CDKN1A/CCND1/PSMB8/CCNH/PSMC5/PSME3/PSMB10/PSMA6/PSMC4/PSMB9/PSMD10/MAX/PSME2/PSMA5/PSMD7/PSMD13/PSMB5/PSMD11/E2F5/PSME1/PSMA2/PSMA1/PTK6/PSMC3/CKS1B/E2F4/RPS27A/PSMD2/SKP1/UBC/PSMD4/PSMC2/PSMB6/PSMA7/PSMD12/PSMD14/PSMB4/UBA52/PSMB3/PSMA3
CHICAS_RB1_TARGETS_GROWING	236	0.372989	1.5374	0.000300571	0.00296587	0.00166199	4117	tags=27%, list=14%, signal=23%	IGFBP3/DCN/AKR1C1/NRXN3/CCDC80/C1R/PCDH7/HAS2/GPC6/ANPEP/PSAT1/FAP/S1PR3/EZR/FABP5/GTSE1/RBMS3/SGO2/NRP1/JADE1/CDC20/NLRP1/TICAM2/PTX3/NMI/ANP32E/BGN/CCBE1/CHAC2/LIN7A/PSPH/TMEM97/HELLS/TSPAN5/TNFSF4/APOBEC3B/NFXL1/TPX2/CA12/DDIT4/LSAMP/ARL4A/MARCKS/SMC4/CACYBP/PPIG/OLFML3/THSD4/CENPK/C1QTNF2/GINS1/TOP2A/EXOSC8/KCNK2/SUPT16H/RGS4/IFI16/MEST/NASP/CBX5/PCLAF/POSTN/CCNB1
BENPORATH_PROLIFERATION	146	0.395333	1.53673	0.00272035	0.0130474	0.00731141	5008	tags=37%, list=18%, signal=31%	RIT1/S100A9/TFRC/PPIL1/AURKA/ASF1A/GTPBP4/KPNA2/NMI/TYMS/FAM49B/PTS/LRP8/CKS2/NUDT5/PBK/PFDN2/CTPS1/DAP3/HSPA14/APOBEC3B/NDUFB5/GINS3/UGGT1/PRC1/RBM8A/CMC2/CSTB/MRPL9/MAGOHB/PDSS1/GARS/CDK1/H2AFZ/TOP2A/CKS1B/RDX/SPAG5/EMC8/UTP25/CENPM/DCUN1D5/UBE2T/PDCD5/HIKESHI/CENPN/BIRC5/CMSS1/DTYMK/RANBP1/NDC80/SNRPD1/PSMB4/DBF4
ZHONG_SECRETOME_OF_LUNG_CANCER_AND_MACROPHAGE	69	0.442546	1.53672	0.0128332	0.0403178	0.0225929	2942	tags=30%, list=10%, signal=27%	CFB/LGALS3BP/TIMP2/MSLN/PSAT1/FN1/CTSA/PGK1/PRDX1/ENO1/CTSB/BGN/LDHA/PSMA6/IGFBP4/TALDO1/PSMB5/TPI1/GSTO1/AGRN/HSP90AB1
RUTELLA_RESPONSE_TO_CSF2RB_AND_IL4_DN	296	0.363923	1.53459	0.00031837	0.00296587	0.00166199	2974	tags=25%, list=10%, signal=23%	C3/PID1/S100A9/AKR1B1/CDKN1C/MAFB/SOD2/TIMP2/DNTTIP2/GSR/IL1B/IFI6/C3AR1/CES1/ABCC3/SNTB1/IFITM2/CXCL1/FPR1/MT1F/PNP/DECR1/CHPF2/CXCL3/ITPR1/VNN1/SIGIRR/CASP1/GLA/SMIM7/SP140L/HK2/GRPEL1/PPIF/SP110/NR1H3/SCO2/HDDC2/STK17A/CTSB/EMC7/FBXL5/STAT1/SON/PLOD3/HERPUD1/AQP9/PRKRIP1/FAH/SLC43A3/ANP32A/CFD/MSRB2/MCTP1/KLF10/RGS2/SPHK1/DDIT4/HEXB/MT1X/PSTPIP1/TSPAN3/TRIT1/NAMPT/IQGAP2/ANXA5/ZNF804A/BTN3A3/C…
DAVICIONI_TARGETS_OF_PAX_FOXO1_FUSIONS_DN	62	0.450863	1.53456	0.0128766	0.0403299	0.0225997	3212	tags=24%, list=11%, signal=22%	IGFBP3/PLK2/GLRX/PLCB4/DUSP4/ITPR1/TRIB2/SPRY4/ZFP36L2/FKBP10/RGS2/DDIT4/PPFIA4/OLFML3/SPOCK2
NOJIMA_SFRP2_TARGETS_UP	31	0.51766	1.53432	0.0291838	0.0731986	0.0410184	5684	tags=65%, list=20%, signal=52%	TNFRSF10D/GADD45A/IKBKG/TNFAIP3/BAG3/TNFRSF9/JUN/CSF1/HSPA1A/TRIB3/HSPA6/CCN2/NR4A3/CIDEC/GADD45B/HSPA5/HSPA1B/CLK1/PPP1R15A/VHL
POOLA_INVASIVE_BREAST_CANCER_UP	235	0.372114	1.53338	0.000300842	0.00296587	0.00166199	4197	tags=29%, list=15%, signal=25%	SRGN/MMP19/LAPTM5/MAFB/HCLS1/TPK1/IL32/KDELR3/GBP1/SAMSN1/ADAM12/GDF15/SP140/TNFAIP6/FN1/STAT4/FAP/TNC/NCF2/AURKA/CCDC88A/SLC16A3/ADGRE2/FKBP11/HS3ST3A1/MAN1A1/IL18R1/CDC20/CALU/LGALS9/PLAUR/GRB2/TYMS/SELPLG/TDO2/LRP8/CKS2/EVI2B/PBK/GNLY/SLAMF8/COTL1/TNFSF4/APOBEC3B/TPX2/IFI30/ARHGAP25/PSTPIP1/PRC1/KIF2C/MMP3/STK17B/DSCC1/GINS1/HHIPL2/RGS16/CDK1/TOP2A/RGS4/THEMIS2/LRMP/LAT2/GLIPR1/PCLAF/BTK/CXCR4…
CHUNG_BLISTER_CYTOTOXICITY_UP	129	0.401028	1.53301	0.00534474	0.021435	0.0120116	5038	tags=40%, list=18%, signal=33%	CDKN1A/COPS8/MT1F/FABP5/ATF5/TNFAIP3/GCHFR/SLC35B2/CTSB/CHCHD3/PBDC1/DIABLO/CKS2/SLC43A3/RFK/GNLY/CUEDC2/SLAMF8/RAB13/CLTA/MT1E/SNAP47/CYB5A/CHTOP/TIMM23/PSMD13/TPI1/MRPL9/TMED9/THYN1/CNDP2/CXorf40A/ETFB/CENPX/SMIM12/TUBB4B/CISD2/SUPT16H/SDHA/PSMD2/USP11/ATOX1/CHID1/SYT11/PSMD14/MRPL57/NANS/SNX5/WDR54/SYTL3/TIGIT
CROONQUIST_NRAS_SIGNALING_DN	70	0.440241	1.53273	0.0128681	0.0403299	0.0225997	4820	tags=39%, list=17%, signal=32%	PLOD2/MYRF/AURKA/ZWINT/CDC20/APOBEC3B/TPX2/EIF5/KIF2C/SMC4/PTP4A3/H2AFX/GALE/GINS1/CDK1/RFC3/TOP2A/CKS1B/SNRPA1/SPAG5/CHEK2/NASP/PCLAF/CCNB1/UBE2C/POLD1/NDC80
REACTOME_UNFOLDED_PROTEIN_RESPONSE_UPR	89	0.42224	1.5324	0.0104699	0.0344492	0.0193044	6686	tags=54%, list=23%, signal=41%	CXCL8/KDELR3/EXTL2/ATF3/GOSR2/XBP1/EIF2S1/SSR1/DNAJB9/EXOSC4/HERPUD1/EXOSC9/DCTN1/EXOSC2/CREB3/FKBP14/MYDGF/SRPRB/EXOSC3/ATF4/PREB/EIF2S2/DDIT3/EXOSC8/TSPYL2/ERN1/TLN1/SRPRA/CXXC1/ARFGAP1/SERP1/EXOSC5/CALR/HSPA5/EXOSC6/ACADVL/EXOSC1/WFS1/ATF6/SHC1/CREB3L1/EDEM1/ASNS/DNAJB11/DIS3/PPP2R5B/ZBTB17/PDIA5
REACTOME_METABOLISM_OF_STEROID_HORMONES	29	0.523806	1.5324	0.0344203	0.0815217	0.0456825	5259	tags=34%, list=18%, signal=28%	AKR1B1/HSD11B1/STARD3NL/SRD5A3/FDXR/FDX2/CYP19A1/AKR1B15/HSD17B14/TSPO
GAJATE_RESPONSE_TO_TRABECTEDIN_UP	64	0.447497	1.53237	0.0134507	0.0416586	0.0233443	2031	tags=33%, list=7%, signal=31%	SRGN/PROS1/CDKN1A/C1R/TGFBI/VLDLR/GADD45A/S100A4/TM4SF1/ATF3/CBS/FOS/CASP4/TNFAIP3/OASL/SEPT6/ISG15/CFD/DUSP5/ARL6IP1/RGS2
BOYLAN_MULTIPLE_MYELOMA_PCA1_UP	98	0.416035	1.53212	0.0102302	0.0338313	0.0189581	2276	tags=26%, list=8%, signal=24%	C3/S100A8/S100A9/LRG1/SERPINA3/TGFBI/AFP/STAT4/FPR1/IFITM3/F2R/PLIN3/NBEA/TENT5C/IL18R1/MAGED1/ABI3BP/LTF/CHST1/RECK/IFITM1/SELENOM/BASP1/MFSD4A/SCART1
SCIBETTA_KDM5B_TARGETS_DN	76	0.433588	1.53191	0.0115115	0.0370792	0.0207781	3544	tags=32%, list=12%, signal=28%	PDE3B/LGALS3BP/INSIG1/LIMCH1/MT1F/AURKA/FABP5/ASF1A/PSME3/ARL6IP5/BUB3/PRPS1/PBK/ISG15/MT1X/AC074143.1/CYB5A/KIF2C/PHF20/EIF5B/FJX1/NMB/CDK1/TOP2A
GARGALOVIC_RESPONSE_TO_OXIDIZED_PHOSPHOLIPIDS_YELLOW_UP	32	0.513829	1.53191	0.0296668	0.0739255	0.0414257	1574	tags=22%, list=6%, signal=21%	HMOX1/OSGIN1/UNKL/LDLR/GCLM/GCLC/C16orf72
BERENJENO_TRANSFORMED_BY_RHOA_FOREVER_DN	28	0.528441	1.53152	0.0359566	0.0842474	0.0472099	4063	tags=50%, list=14%, signal=43%	CCDC80/NOP58/F2R/PTGS2/NPNT/PLAUR/PHLDA1/IER3/EPHA2/HSPH1/HBEGF/CAVIN2/ANKRD1/POSTN
FIGUEROA_AML_METHYLATION_CLUSTER_2_UP	44	0.482355	1.53152	0.0218268	0.059211	0.0331802	4652	tags=36%, list=16%, signal=30%	PMAIP1/SLC39A14/EXOSC2/MAP7D3/WBP1L/EXOSC3/PCDHGB7/MRPL9/MATR3/NRP2/MCTS1/THBS4/SAP30BP/ZNF281/COL21A1/KRT81
REACTOME_ER_TO_GOLGI_ANTEROGRADE_TRANSPORT	151	0.391279	1.53088	0.00300711	0.01407	0.0078844	4384	tags=30%, list=15%, signal=25%	SERPINA1/AREG/TUBAL3/KDELR3/CD59/ARF4/LMAN2L/GOSR2/SEC22B/CAPZA1/NSF/COPG1/YKT6/COPB1/SCFD1/DCTN6/DYNLL1/DCTN1/TUBA1C/ACTR10/MCFD2/BET1L/SEC16A/COPG2/DYNC1LI1/SAR1B/TGFA/CSNK1D/NAPB/TRAPPC3/TMED9/PREB/F8/COG6/TUBB3/TUBB4B/TRAPPC4/CTSZ/TUBB2A/RAB1A/ARFGAP1/TUBA8/TUBB6/TFG/TRAPPC2L
FERRANDO_T_ALL_WITH_MLL_ENL_FUSION_UP	84	0.425747	1.53069	0.0115986	0.0372421	0.0208694	3265	tags=29%, list=11%, signal=25%	VIM/MME/LAPTM5/IL32/NFIL3/IFITM2/BIN1/TNFAIP3/G6PD/GDI1/MAD1L1/PRDX1/CLEC2B/CREB3/PRKAR1B/TPM2/VDAC1/FLNA/MRPS12/PXDN/CDH4/SPOCK2/TSC22D1/SSR4
ZHOU_TNF_SIGNALING_30MIN	52	0.464946	1.53023	0.0190024	0.0531511	0.0297843	6008	tags=48%, list=21%, signal=38%	KRT14/CXCL1/TNFAIP3/PTGS2/IER2/DDX56/DUSP1/IFI27/SIGMAR1/KLF10/ATP5MC2/PHB/ATF4/TUBB4B/NDUFA13/TAGLN2/PRDX5/SF3B2/ERGIC3/SLC39A1/CDC123/MAP2K1/CLIC1/HNRNPU/PSMB7
KEGG_STARCH_AND_SUCROSE_METABOLISM	37	0.496483	1.53017	0.0273626	0.0696007	0.0390022	3996	tags=30%, list=14%, signal=26%	UGP2/GBE1/UGDH/HK2/PGM1/HK1/ENPP1/GAA/GYS1/UXS1/MGAM
WELCSH_BRCA1_TARGETS_UP	196	0.37871	1.52982	0.00113154	0.00685647	0.00384217	4003	tags=34%, list=14%, signal=30%	CDKN1A/COPS8/PTGR1/MFGE8/BNIP3/MAT2A/MPV17/PAM/ACTA2/ZNF711/TIMM17A/MGAT2/EXTL2/PGRMC1/FSTL1/B2M/TM9SF1/SSR1/CYBA/HIST2H4A/VAMP3/TXNDC9/KIF5B/TAF12/NEU1/STAT1/CKS2/SRSF3/ECH1/QPCT/RABGGTB/HDAC1/GATD3A/HMGN3/HEXB/SELENOP/PTPN1/GUCY1B1/NAT1/ANXA5/PLD3/KIF2C/TAF11/CCT7/GPR1/HMGCL/LIPA/IDH1/RHOC/MYL12A/RBM3/SERPINB1/CD46/WRB/NDUFA12/GSTZ1/TUBB3/GPS2/ANXA7/CDK1/TOP2A/RDX/RAB1A/PPIC/ATP5PB/TUBB/MTOR
HONMA_DOCETAXEL_RESISTANCE	35	0.502215	1.52879	0.0307058	0.0758963	0.0425301	5830	tags=54%, list=20%, signal=43%	IFI6/UFM1/GAPDH/ENO1/ANAPC7/DYNLL1/ATP5F1E/MYDGF/MRPL17/TUBB/PDCD5/NDUFS3/CALR/HSPA5/PPP1R14B/APRT/SLC25A3/RPL38/COX7C
KAAB_FAILED_HEART_ATRIUM_DN	145	0.393717	1.52863	0.0038116	0.016544	0.00927076	5167	tags=39%, list=18%, signal=32%	RIT1/SERPINA3/TAGLN/CD59/IFITM3/DDX21/TM9SF1/AMD1/PGK1/PLEKHB2/PGM1/SLC39A14/GRB2/PRDX1/TXN/MLEC/PIGH/TGFBR2/LDHA/IFITM1/ACOT13/PODXL/ATP6V0E1/TPM2/OSMR/ELOC/ADRM1/CLIC4/FKBP9/HNRNPL/CTTN/PSMB5/TGFBR3/ACOX2/USP2/CNN3/FKBP1A/TSC22D1/LAGE3/BLVRB/STAT3/RAN/RAB1A/RAD1/ACTB/STX4/MAD2L1BP/ACP1/PMP22/SDF2/PARVB/ST3GAL1/PSMB4/ZP3/DGUOK/PSMB3/PSMA3
DAZARD_UV_RESPONSE_CLUSTER_G1	57	0.456573	1.5285	0.0164769	0.0481559	0.0269852	6906	tags=56%, list=24%, signal=43%	PPBP/MVP/ZNF330/NCBP2/PGK1/GUK1/ERCC2/PKM/TXN/DYNLL1/PDLIM5/NOL7/STK17B/HSP90AB1/TSC22D1/MYL6/SNRPE/TUBB2A/SEC61G/COX7A2/CHRNB4/STAT6/RANBP1/UQCRB/RPS23/RPL38/COX7C/RPL31/RPS17/IL6/RPL34/RPS21
WOOD_EBV_EBNA1_TARGETS_DN	47	0.475666	1.5282	0.0197713	0.0548827	0.0307547	2931	tags=32%, list=10%, signal=29%	S100A8/UGP2/TGFBI/MFAP5/PTGS2/PSMB8/KIF5B/CCN5/CLEC2B/RAB13/RGS2/SPHK1/IDI1/SLC27A5/ABCE1
SMID_BREAST_CANCER_RELAPSE_IN_BONE_DN	276	0.364727	1.52751	0.00062054	0.00442623	0.00248033	1515	tags=19%, list=5%, signal=18%	KRT14/PLOD2/S100A8/KRT16/KYNU/CA9/AKR1C1/PDZK1IP1/S100A9/PTGFR/CXCL8/SOD2/MFGE8/MSLN/COL4A2/IL32/PSAT1/HPCAL1/GBP1/BAG2/LTBP1/TM4SF1/VEGFA/SLC16A3/CCL20/SYNM/STIP1/PGRMC1/KHDRBS3/DNAJB4/PTGS2/AMD1/CYBA/IL1R2/CAPN6/CALU/NLRP1/TMEM45A/PDK1/SMPDL3B/CEP170/PTX3/KCNG1/ENO1/GALNT14/TDO2/ANP32E/BGN/HSPD1/SERPINB2/ST8SIA1/PSPH/ZFP36L2
YOSHIMURA_MAPK8_TARGETS_DN	328	0.358421	1.52704	0.000647878	0.00456799	0.00255977	4234	tags=30%, list=15%, signal=26%	ZEB1/NPR3/C1R/PAPSS2/P4HA1/TFRC/PSAT1/EGLN3/FGFR1/PTPRM/GADD45A/PLOD1/AFP/PTPRJ/FN1/GPAM/PDE4B/SRPX/PSAP/VEGFA/LDLR/TIMM10B/PPAT/APMAP/BDNF/SDC2/TOR1AIP1/ITPR1/GCLM/AMD1/PSMC5/EGF/PGK1/SART3/DNAJB9/DMAC2/ALAS1/PDK1/COPB1/SCFD1/ANKRD24/AIMP2/SRSF3/EHMT2/ATP6V1D/SLC6A6/DHODH/HSPH1/NOLC1/KLF10/RABGGTB/IFT46/NRDC/THOC2/EIF5/UQCC2/CCT3/MAX/CACNA1A/SEC62/CYB5B/TIMM23/ST3GAL5/DNAJA2/ACSL1/MSMO1/TGFA/SUB…
BASSO_CD40_SIGNALING_UP	91	0.419668	1.52617	0.0105588	0.0346303	0.0194058	3637	tags=35%, list=13%, signal=31%	SRGN/LAPTM5/TNFSF9/IL1B/ICAM1/ICOSLG/NCF2/CD83/ELOA/TNFAIP3/STK10/NFKB2/ARHGEF2/NCKAP1L/DUSP2/TMSB4X/STAT1/IER3/RAB27A/IRF9/VOPP1/PLXNC1/CXCR5/IFI30/DDIT4/TRIP10/PTP4A3/KRT7/ZFP36L1/EHD1/LYN/GADD45B
BENPORATH_MYC_TARGETS_WITH_EBOX	216	0.373023	1.526	0.000866551	0.0055358	0.0031021	4455	tags=38%, list=16%, signal=32%	SQSTM1/TFRC/MUC1/GALNS/ICAM1/MDM2/CCND1/HIF1A/HSPA8/CASP8/ARF4/GAPDH/SURF6/CBS/BAX/AMD1/GLA/SLC19A1/NOP2/NSUN2/RIDA/PIM2/EIF4E/FOSL1/MGST1/TOP1/FGFR4/NR1D1/ENO1/TOMM20/TXN/JUN/HSPD1/HERPUD1/DKC1/ZFP36L2/FAH/SLC4A2/SIGMAR1/POLB/RGS2/HMBS/ITGB1/TPM2/SRM/QDPR/EIF4A1/HSP90AA1/ACO2/PHB/PAICS/BCL3/NME1/CSTB/ATF4/MSN/RBM3/PDHA1/HSP90AB1/PPID/KLF1/IRF3/UROD/SLC9A3R2/FPGS/HES1/H2AFZ/RCC1/IFRD2/CD63/ARSB/S…
CORRE_MULTIPLE_MYELOMA_UP	73	0.435004	1.52564	0.0126866	0.0399392	0.0223808	2200	tags=23%, list=8%, signal=22%	NRXN3/ADAMTS12/AREG/PDGFRL/GLRX/IL1B/SAMSN1/GDF15/LZTS3/ABCA6/ANGPTL4/NLRP1/SERPINB2/PSPH/TNFSF4/TLR4/TFPI
REACTOME_CARGO_RECOGNITION_FOR_CLATHRIN_MEDIATED_ENDOCYTOSIS	100	0.413378	1.52542	0.00980898	0.0329594	0.0184695	5083	tags=37%, list=18%, signal=31%	COPS8/IL7R/AREG/WNT5A/TFRC/EPGN/TGOLN2/LDLR/AP2M1/EGF/BTC/VAMP3/GRB2/CLTCL1/TOR1B/NECAP1/AP2A1/CLTA/EPS15L1/COPS7A/TGFA/HBEGF/AP2S1/AAK1/TACR1/COPS6/NEDD8/RPS27A/UBC/ARRB2/SYT11/M6PR/COPS5/SH3GL1/NECAP2/DAB2/UBA52
KEGG_SPHINGOLIPID_METABOLISM	35	0.500653	1.52404	0.0329973	0.0790694	0.0443082	3196	tags=31%, list=11%, signal=28%	SGPP2/GLA/DEGS1/UGT8/NEU1/NEU3/SPHK1/CERK/B4GALT6/SPHK2/SGPP1
TCGA_GLIOBLASTOMA_COPY_NUMBER_DN	28	0.524993	1.52153	0.0373134	0.086334	0.0483791	6156	tags=54%, list=22%, signal=42%	SPRYD7/CDKN2C/ENO1/TRIM13/EVI2B/PHF11/CDADC1/CAB39L/PRKN/RCBTB2/FNDC3A/EBPL/KPNA3/FAF1/PTEN
REACTOME_METABOLISM_OF_STEROIDS	140	0.393149	1.52151	0.0048583	0.0198336	0.0111142	5817	tags=30%, list=20%, signal=24%	AKR1C1/AKR1C2/AKR1B1/AKR1C3/HSD11B1/HSD3B7/INSIG1/CYP27B1/ABCC3/GPAM/TBL1X/STARD3NL/SRD5A3/IDI1/MSMO1/SAR1B/ARV1/FDXR/SLC27A5/TGS1/MVD/ACOX2/SLCO1B3/HELZ2/FDX2/ACAT2/FABP6/RAN/FDPS/OSBPL6/CYP19A1/AKR1B15/CYP2R1/CYP27A1/HSD17B14/TSPO/PMVK/SLCO1A2/SCP2/HSD17B4/SUMO2/HMGCS1
REACTOME_MITOTIC_METAPHASE_AND_ANAPHASE	197	0.376162	1.52143	0.00141044	0.00812794	0.00455467	5670	tags=39%, list=20%, signal=31%	TUBAL3/MAPRE1/ZWINT/PSMB8/PSMC5/SGO2/CDC20/PSME3/MAD1L1/B9D2/SEH1L/ANAPC7/PSMB10/BUB3/NSL1/DYNLL1/NUDC/PSMA6/TUBA1C/PSMC4/PSMB9/PPP2CB/PSMD10/PSME2/PSMA5/CDC26/DYNC1LI1/LMNB1/PSMD7/KIF2C/PSMD13/PSMB5/PSMD11/CENPK/PSME1/CENPS/NUP43/ANAPC4/PSMA2/PSMA1/TUBB3/PSMC3/TUBB4B/SPDL1/BANF1/TUBB2A/CENPM/RPS27A/PSMD2/PPP2CA/TUBA8/TUBB6/CENPN/UBC/PSMD4/UBE2C/BIRC5/PSMC2/PSMB6/TUBB2B/PSMA7/PSMD12/CDCA8/PSMD14/…
IVANOVA_HEMATOPOIESIS_LATE_PROGENITOR	465	0.346189	1.52143	0.000361272	0.00300405	0.00168339	5562	tags=35%, list=20%, signal=29%	SAA1/GBE1/PTGR1/ZEB2/UGDH/GSR/TFRC/HSD11B1/GLRX/SLC22A4/KCNQ3/UBE2V2/CEMIP2/BAG2/PPIL1/SAT1/ASB1/SNTB1/IL1RL1/GMIP/OSTM1/ADSSL1/MTFP1/TMEM156/EIF2S1/G6PD/TM9SF1/GPC1/FASTKD2/L3MBTL2/LRRC20/CASP1/NRP1/CHAC1/CPNE8/GATC/ALAS1/UBTD1/RAB31/STAMBPL1/ENO1/CLP1/CTSB/SEH1L/ATP6V0B/KCTD14/SAP30/SERBP1/BAZ1A/SLC35E1/PBK/PTPRO/TMEM167A/ITPA/CPOX/PHF5A/VMA21/DAP3/PPP2CB/SLC25A33/PRELID3B/MOB3A/HMBS/SPHK1/ATP6…
WARTERS_IR_RESPONSE_5GY	43	0.47956	1.52065	0.0251469	0.0656936	0.0368128	3253	tags=37%, list=11%, signal=33%	CDKN1A/TIGAR/AEN/SH2D2A/GDF15/GADD45A/MDM2/B2M/PLK3/VWCE/FAS/FDXR/COQ9/CAVIN2/PHLDB3/BLOC1S2
PID_TNF_PATHWAY	45	0.476322	1.52027	0.0232448	0.0622846	0.0349025	2210	tags=27%, list=8%, signal=25%	SQSTM1/BIRC3/IKBKG/CASP8/TNFAIP3/TXN/STAT1/TNFRSF1A/MAP3K7/MAP4K4/FADD/RIPK1
REACTOME_PROTEIN_FOLDING	98	0.412755	1.52005	0.0109974	0.0358002	0.0200614	4814	tags=40%, list=17%, signal=33%	TUBAL3/TBCE/CCT6A/GNG11/NOP56/CCT2/FBXL5/CCT5/TUBA1C/TCP1/GNG2/PFDN2/CCT4/SPHK1/CCT3/VBP1/FKBP9/WRAP53/CCT8/SKIV2L/CCT7/PFDN5/GNG7/TUBB3/GNG3/TUBB4B/FBXW10/STAT3/TUBB2A/USP11/ACTB/TBCB/TUBA8/TUBB6/TBCC/PFDN6/TUBB2B/KIFC3/GNAI2
COLIN_PILOCYTIC_ASTROCYTOMA_VS_GLIOBLASTOMA_DN	25	0.539503	1.51994	0.0415556	0.0937067	0.0525106	877	tags=24%, list=3%, signal=23%	SQSTM1/TGFBI/TFRC/TXNRD1/FN1/PGK1
REACTOME_DDX58_IFIH1_MEDIATED_INDUCTION_OF_INTERFERON_ALPHA_BETA	63	0.444881	1.5196	0.015321	0.0460081	0.0257817	4175	tags=35%, list=15%, signal=30%	SAA1/IKBKG/UBE2L6/CASP8/TNFAIP3/NKIRAS1/NFKB2/ATG12/NLRC5/UBA7/ISG15/FADD/RIPK1/SIKE1/IKBKE/UBE2K/IRF3/CASP10/TRAF2/RPS27A/UBC/PIN1
DOANE_BREAST_CANCER_CLASSES_DN	33	0.504891	1.51955	0.0326062	0.078563	0.0440245	2552	tags=30%, list=9%, signal=28%	PLOD2/KRT16/PMAIP1/TIMP2/CALU/PLAUR/ANP32E/POPDC3/MARCH3/WWTR1
REACTOME_FATTY_ACID_METABOLISM	168	0.383696	1.51923	0.00223651	0.0113497	0.00636005	3047	tags=23%, list=11%, signal=21%	ALOX15B/GGT5/AKR1C3/ALOX5AP/SLC22A5/PTGR1/PON2/ACOX3/TBXAS1/DECR1/CBR1/FADS1/PTGS2/ACSL4/SLC25A20/ACSBG1/MMAA/DECR2/ACOT2/ACSL5/ELOVL5/PTGES3/CYP4F11/ACOT13/PPT1/PON3/PRKAG2/SLC25A17/PECR/SLC25A1/THEM4/ACSL1/PTGS1/ECHS1/MORC2/MID1IP1/MECR/ACOX2/CYP2J2
KEGG_PEROXISOME	75	0.430158	1.51783	0.0137328	0.0421244	0.0236053	5996	tags=43%, list=21%, signal=34%	SOD2/MPV17/ACOX3/ACSL4/DECR2/PRDX1/ACSL5/ECH1/PEX2/SLC25A17/PECR/ABCD2/ACSL1/PEX5/HMGCL/IDH1/ACOX2/PEX16/DDO/PEX14/NOS2/PEX6/PEX3/ACAA1/PRDX5/NUDT19/HACL1/PMVK/SCP2/HSD17B4/CRAT/SOD1
PEDERSEN_METASTASIS_BY_ERBB2_ISOFORM_1	44	0.477773	1.51697	0.023962	0.0636825	0.0356858	2787	tags=39%, list=10%, signal=35%	SLC7A11/AREG/MAP1B/RUNX2/DUSP4/GEM/LIF/PLK3/FOSL1/PHLDA1/STAMBPL1/SPRY4/EPHA2/DUSP5/CCN2/TNFRSF21/HBEGF
CAIRO_LIVER_DEVELOPMENT_UP	149	0.38887	1.51692	0.00328677	0.0148717	0.00833369	2128	tags=24%, list=7%, signal=22%	PLOD2/SERPINE2/FAM136A/PLK2/IFRD1/PCOLCE2/FGFR1/SERPINH1/PDGFC/BYSL/POLR1E/GRWD1/SRSF7/EFNB2/NR2F1/PNO1/GPC1/UTP3/RCN1/WLS/CAPN6/RBM34/MAK16/PKM/CDH16/JUN/RECK/SEPT6/SPATS2/CTPS1/SLC25A4/LRP12/FKBP10/BASP1/HMGN3/SRM
LINDGREN_BLADDER_CANCER_CLUSTER_2A_DN	134	0.393179	1.51677	0.00503979	0.0203722	0.011416	2610	tags=28%, list=9%, signal=26%	MAFB/CCN3/C3AR1/NFIL3/TMOD1/HABP4/LIG4/AFAP1L1/SDCBP/TGOLN2/TOX2/SOCS3/ACSL4/PRPF4/VCPKMT/JADE1/POLE3/HIST1H2BD/NGRN/DNAJB9/ALG2/CDK5RAP2/PRKCQ/SON/STXBP1/ARMC8/IFITM1/PNMA1/SELENOP/SCML1/MT1X/MT1E/DCBLD2/MAP3K20/CLIC4/IQGAP2/ANXA5/NEK6
STEIN_ESRRA_TARGETS_UP	382	0.350953	1.5166	0.000338639	0.00296587	0.00166199	4898	tags=37%, list=17%, signal=31%	NPR3/UGP2/ALDOC/MAFB/SOD2/EGLN3/IMPA1/SLC2A6/GDF15/MAP1B/ANXA6/CYP27B1/TIMM17A/GFPT2/HTATIP2/AURKA/VEGFA/SLC16A3/TACC2/MRPS30/DECR1/TMEM132A/DFFA/PLIN3/JMJD6/SLC25A20/SAMM50/GRPEL1/PPIF/RTL8C/PLEKHB2/PGM1/TIMM8A/DHRS11/VDAC2/CALU/ALAS1/QRSL1/GAS2L1/CIAPIN1/HCCS/DUSP1/NDUFAF4/ST6GALNAC4/CHCHD3/ESRRA/FAM162A/MIEF1/CYCS/OGDH/SEC23B/MRPL35/HK1/OTUB2/IDH3B/BDH2/SLC25A4/GAS6/PCYT2/COQ3/CA12/DHDDS/NDUFB…
INGRAM_SHH_TARGETS_UP	113	0.403007	1.51652	0.00701299	0.0262344	0.014701	3692	tags=33%, list=13%, signal=29%	IGFBP3/DCN/FTL/FBN1/GADD45A/EPHX1/BDNF/OMD/CFHR1/DUSP1/FBN2/GPCPD1/NR4A1/OLFML2B/CYSTM1/FEN1/IGFBP4/SLC6A6/TSPAN5/KLF10/AMH/MR1/HHIP/SELENOP/THBD/CCN2/PAICS/ENPP1/TEK/DSCC1/GSTZ1/ZFP36L1/RASSF3/BGLAP/HES1/SPRY1/NGLY1
ANASTASSIOU_MULTICANCER_INVASIVENESS_SIGNATURE	60	0.449048	1.51648	0.0170316	0.0494467	0.0277085	1625	tags=27%, list=6%, signal=25%	DCN/LOX/FBN1/ADAM12/MFAP5/TNFAIP6/FN1/ACTA2/FAP/PLAU/SUGCT/LOXL2/RAB31/GLT8D2/BGN/OLFML2B
MOOTHA_GLUCONEOGENESIS	29	0.51836	1.51646	0.0373641	0.086334	0.0483791	4661	tags=38%, list=16%, signal=32%	ALDOC/ME1/ENO2/PGK1/ENO1/LDHA/ALDOA/TPI1/BID/MDH1/LDHB
REACTOME_METABOLIC_DISORDERS_OF_BIOLOGICAL_OXIDATION_ENZYMES	29	0.518233	1.51609	0.0375906	0.0867475	0.0486108	5189	tags=48%, list=18%, signal=40%	TBXAS1/CYP27B1/GCLM/TPMT/GCLC/GSS/FDXR/FDX2/CYP19A1/OPLAH/CYP1B1/CYP2R1/CYP27A1/GGT1
MOHANKUMAR_HOXA1_TARGETS_UP	395	0.349694	1.51551	0.000338639	0.00296587	0.00166199	4319	tags=32%, list=15%, signal=27%	KYNU/COPS8/SQSTM1/SLC39A8/UGP2/PLK2/BAMBI/MAT2A/CHN1/PGD/UBE2L6/TIMM17A/SEZ6L2/TSKU/HSPA8/AR/HTATIP2/CLN8/HIBADH/ZWINT/PGRMC1/CCT6A/G6PD/PPAN/AMD1/GLA/NOP2/HIST2H4A/CDC20/GALNT6/ISG20L2/SHCBP1/KPNA2/GRB2/CCN5/DNAJA3/GNL2/ELOVL5/COPB1/PKM/MEPCE/ANP32E/ALKBH5/LIN7A/LDHA/HIST1H1C/IER3/LRP8/CHKA/HELLS/DCTN1/CCDC47/PIP4K2A/TUBA1C/PPT1/PRMT1/FUT8/TSPAN5/CCDC71/FUS/HSPA14/NOLC1/SMN1/HMBS/PHTF1/CA12/DDX1…
DARWICHE_PAPILLOMA_RISK_HIGH_UP	128	0.396711	1.51523	0.00693703	0.0260139	0.0145774	4011	tags=34%, list=14%, signal=29%	S100A8/S100A9/FTL/IL1B/HEXA/ICAM1/GALK1/ID1/IFITM3/BATF3/GCLM/LRIF1/PGK1/LIF/TRMT1/ENO1/TXN/FAM162A/PLEKHA4/LDHA/DYNLL1/CHKA/MGAT1/CCT4/CSPP1/SUCLG2/SRM/ENG/QDPR/TGFA/PGAM1/CACYBP/HBS1L/EEF1D/TNFRSF25/SLPI/BID/TRAF2/H2AFZ/SFPQ/VPS37A/PPIC/PDCD5
MODY_HIPPOCAMPUS_NEONATAL	32	0.507473	1.51296	0.0337745	0.0804907	0.0451047	2644	tags=38%, list=9%, signal=34%	CDH2/FN1/TNC/FABP5/VARS/NRP1/COL4A1/CCT5/CCT4/TARS/CCT8/CCT7
WANG_SMARCE1_TARGETS_UP	278	0.360414	1.51233	0.000616523	0.00440785	0.00247003	1921	tags=21%, list=7%, signal=20%	DCN/RTN1/CFH/COL8A1/C1S/PROS1/NPR3/PCDH7/MAFB/DPYD/CFI/TIMP2/IFIT3/TGFBI/VLDLR/HS3ST3B1/SMTN/IL1R1/MFAP5/ME1/MAP1B/FN1/TAGLN/ACTA2/CEMIP2/FAP/ZNF711/COL12A1/FOXO1/FBLIM1/MCF2L2/S1PR3/SRPX/TOX2/IFIT2/SEL1L3/F2R/SIPA1L2/SOCS3/SDC2/ANOS1/CCDC71L/BACE2/ITGB3/TRIB2/RBMS1/PTX3/TPBG/TDO2/GLIPR2/PRR5L/IRS1/RAB27A/CLEC2B/GNG2/IGFBP4/JCAD/HS6ST2
NAGASHIMA_NRG1_SIGNALING_UP	171	0.38064	1.51193	0.00252313	0.0124328	0.00696699	3810	tags=43%, list=13%, signal=38%	PMAIP1/FERMT2/AREG/AEN/SLCO4A1/IFRD1/EGLN3/NFIL3/GDF15/GADD45A/PLEKHO2/ID1/EZR/ATF3/VEGFA/LDLR/FOS/DUSP4/GEM/JMJD6/PPRC1/PHLDA2/LIF/IER2/GTPBP4/FOSL1/DUSP2/PLAUR/PWP2/TNFRSF10B/TOP1/PFKFB3/YRDC/MIR22HG/IER5/DUSP1/FOSB/SOCS1/AKIRIN1/JUN/IER3/NR4A1/PDLIM5/SERPINB8/EGR4/EPHA2/DUSP5/ARPC5L/KLF10/RGS2/SPHK1/ZYX/TNFRSF11B/EIF5/ARC/TOB2/ATG101/CSNK1D/CCN2/TNFRSF21/HBEGF/MAP3K14/PALLD/TNFRSF12A/NR4A3/DDI…
GOLDRATH_HOMEOSTATIC_PROLIFERATION	143	0.389706	1.51184	0.0048675	0.0198336	0.0111142	4553	tags=39%, list=16%, signal=33%	BAG2/BYSL/GALK1/NIFK/TGOLN2/TIMM22/PSMC5/TRNT1/MRPS25/VDAC2/C9orf85/PTGES3/ATP6V0B/FAM162A/AQP9/NABP1/RECK/TAF9/EIF3J/VOPP1/RPIA/TIAL1/QDPR/EOMES/DUSP19/ZNF131/SEC62/TAF1D/EID1/SMN2/CACYBP/NME1/UBL5/YIPF5/MRPL9/MRPS33/CMBL/LAGE3/HSPE1/RNF11/MICOS10/SFPQ/ARL14EP/RAB5C/PCGF2/CHEK2/SRPRA/C5orf30/NDUFB2/GNPNAT1/SET/KCTD12/NDUFB3/LIN7C/IL10RB/ARL4C
REACTOME_IMMUNOREGULATORY_INTERACTIONS_BETWEEN_A_LYMPHOID_AND_A_NON_LYMPHOID_CELL	90	0.415977	1.51156	0.0112618	0.0364669	0.020435	2096	tags=12%, list=7%, signal=11%	C3/PVR/ICAM1/SLAMF7/B2M/ULBP3/HLA-B/HLA-A/IFITM1/CLEC2B/ITGB1
MA_MYELOID_DIFFERENTIATION_UP	33	0.502161	1.51133	0.0339839	0.0809267	0.045349	4261	tags=33%, list=15%, signal=28%	CDKN1A/MDM2/BNIP3L/EMP3/FGFR4/CCT5/TIAL1/GNAS/PPM1G/CALR/IMPDH2
ONDER_CDH1_TARGETS_1_DN	169	0.381443	1.51109	0.00224027	0.0113497	0.00636005	3087	tags=35%, list=11%, signal=31%	IGFBP3/IL7R/CXCL8/IL1B/UTP14A/POP1/MFAP5/DNAJA1/CEMIP2/CSF3/CXCL1/TOE1/HSPA8/CASP8/RRS1/CXCL2/ADGRE2/ENC1/UMPS/PNO1/CXCL3/PTGS2/SP100/TOR1AIP1/ADAMTS1/IL1R2/KIF5B/FOSL1/HCCS/MIR22HG/TMX1/SERPINB2/KRT8/SLC43A3/SRSF3/SERPINB8/EXOSC2/FEN1/CHRNA5/HSPH1/KLF10/B3GNT2/POGLUT1/OSMR/HS3ST2/EIF5/ARHGAP25/DCBLD2/MAX/NAV3/TGFA/SUB1/TIPIN/MARC1/HBEGF/SERPINB1/KRT34/G3BP1/WTAP
FRIDMAN_SENESCENCE_UP	72	0.431828	1.51018	0.014918	0.0451449	0.0252979	1902	tags=26%, list=7%, signal=25%	IGFBP3/VIM/CDKN1A/CDKN1C/FN1/MDM2/CCND1/ESM1/HTATIP2/F3/TNFAIP3/RAB31/GUK1/STAT1/SERPINB2/ISG15/IGFBP4/PEA15/RAB13
MARSON_FOXP3_TARGETS_DN	46	0.471346	1.50978	0.0242511	0.0640831	0.0359104	4646	tags=35%, list=16%, signal=29%	PDE3B/GRAMD1B/ENC1/NABP1/ZFP36L2/RCL1/DENND2D/NOLC1/RGS2/CDV3/GADD45B/ETF1/UTP25/PTPN22/GSTT2B/M6PR
KONDO_EZH2_TARGETS	213	0.369599	1.50973	0.00173712	0.00942478	0.00528138	1628	tags=16%, list=6%, signal=16%	IGFBP3/DNER/COL8A1/C1S/ZEB1/HAS2/IFIT3/AOX1/TNFRSF6B/GPC6/DSEL/IFI6/NMNAT1/TNFAIP6/GALNS/NIP7/CD59/ALDH3B1/CCL20/IFIT2/RBMS3/NRP1/EPHA5/ANOS1/TMEM45A/HOXC8/MGLL/ABI3BP/SLC4A8/ST6GALNAC4/SPRY4/CACTIN/NNMT/ANTXR2/TPM3
FLECHNER_PBL_KIDNEY_TRANSPLANT_OK_VS_DONOR_UP	152	0.385867	1.50969	0.0038451	0.0165998	0.00930203	4429	tags=34%, list=16%, signal=28%	ALOX5AP/TFRC/FTH1/TAF7/STAT4/SAT1/TIMM17A/ZPR1/SRRM1/SF3B4/PLIN3/ANAPC13/BTN3A2/MAGED1/LGALS9/BMS1/TXN/STXBP1/PRPS1/SRSF3/EMG1/PRMT1/DAP3/RGS2/HAX1/ITGB1/NDUFB5/VDAC1/PSMA5/PA2G4/CYC1/IKBKE/ACO2/ATP5MC1/CCT7/HBEGF/FLT3LG/PSMA2/CHD3/ARID5A/TSFM/EEF1B2/URI1/ACTB/RPS20/UGCG/LAMTOR5/TXNL4A/IMMT/ANP32B/PECAM1
FLORIO_HUMAN_NEOCORTEX	32	0.506184	1.50911	0.0346874	0.0819639	0.0459303	2052	tags=19%, list=7%, signal=17%	C20orf197/APOL1/TRIM22/SP140L/LINC01550/ERAP2
DIRMEIER_LMP1_RESPONSE_EARLY	56	0.452378	1.5091	0.0197829	0.0548827	0.0307547	5880	tags=54%, list=21%, signal=43%	TNFSF9/BIRC3/ZC3H12A/FTH1/ICAM1/INSIG1/CD83/TNFAIP3/IER2/NFKB2/DUSP2/JUN/HERPUD1/DUSP5/LCP1/HSP90AB1/UBE2M/MUC13/GADD45B/ZFP36/RPS10/ACTB/EIF1/MCL1/TRAF4/PPP1R15A/KDM6B/NFKBIZ/HMGCS1/RPS9
REACTOME_BILE_ACID_AND_BILE_SALT_METABOLISM	39	0.484904	1.50835	0.0295612	0.0737647	0.0413356	354	tags=13%, list=1%, signal=13%	AKR1C1/AKR1C2/AKR1C3/HSD3B7/ABCC3
ABBUD_LIF_SIGNALING_1_UP	40	0.482047	1.50655	0.0303381	0.0751967	0.0421381	3755	tags=48%, list=13%, signal=41%	LRG1/ALDOC/IL1R1/GPX3/XBP1/RASA3/SOCS3/PSMB8/MAN1A1/NMI/GPCPD1/TNFRSF1A/KLF10/PTPN1/BCL3/TSPAN4/STAT3/RGS4/CEBPB
SATO_SILENCED_BY_METHYLATION_IN_PANCREATIC_CANCER_1	369	0.349414	1.50558	0.000670466	0.0046948	0.00263083	1522	tags=15%, list=5%, signal=15%	C3/IGFBP3/SERPINA1/CDKN1A/SAA1/STC1/MMP19/LAPTM5/CDKN1C/LHFPL6/TNFRSF10D/SOD2/BIRC3/SLC7A11/PMAIP1/SNAI1/IL32/BNIP3/PSAT1/IL1R1/IL1B/IFI6/GDF15/ICAM1/PML/ABCC3/SNTB1/TSKU/TWIST1/PGF/KHDRBS3/ZCCHC24/PSMB8/CHAC1/GALNT6/NFKB2/DNAJC12/HLA-B/ENOSF1/PDK1/PRAF2/PLAUR/TAP2/TPST1/MATN1/RAB31/PTX3/RASSF1/PROCR/NR1D1/PTGIR/NEU1/KCTD14/ULBP2/CSF1/AC080038.1/IER3
DEURIG_T_CELL_PROLYMPHOCYTIC_LEUKEMIA_DN	292	0.357554	1.50477	0.000636537	0.00450881	0.00252661	3628	tags=26%, list=13%, signal=23%	SRGN/AKR1C3/BIRC3/PMAIP1/PPBP/CHN1/PTPRM/PAM/HABP4/STAT4/CD59/PDE4B/ENC1/PATZ1/SEL1L3/TRIM22/APMAP/F2R/CASP4/GNG11/TOR1AIP1/DAPP1/CASP1/MAN1A1/IL18R1/DEGS1/CEBPZ/ENOSF1/NLRP1/CDKN2C/ATG12/YKT6/ARL6IP5/STK17A/TGFBR2/ST8SIA1/EED/CHMP7/EVI2B/RAB27A/IFITM1/CLEC2B/DUSP12/GNLY/GLMN/DUSP5/RAP2C/HSPA14/B3GNT2/CXCR5/CREM/SCML1/MT1X/IDI1/ATG16L1/ARHGAP25/PFKP/EIF4E2/CTR9/TAF1D/FAS/THOC1/TRMT11/CMC2/TGFBR3/…
AIYAR_COBRA1_TARGETS_UP	37	0.488242	1.50477	0.0326512	0.0786095	0.0440505	3006	tags=38%, list=11%, signal=34%	S100A8/SERPINA3/AREG/GADD45A/DEGS1/TPBG/TOMM20/ASS1/CTSB/IFITM1/SLC52A2/TRIB3/ACOX2/EPRS
REACTOME_METABOLISM_OF_AMINO_ACIDS_AND_DERIVATIVES	350	0.349941	1.50408	0.000652742	0.00458117	0.00256716	7823	tags=50%, list=27%, signal=37%	KYNU/PAPSS2/GSR/PSAT1/NQO1/TXNRD1/SAT1/HIBADH/CBS/SUOX/RPS27L/PSMB8/SCLY/AMD1/PSMC5/SDSL/ALDH9A1/PSME3/RIDA/AIMP1/PYCR1/SLC25A15/ASS1/TDO2/RARS/AIMP2/PSMB10/SMOX/PSPH/OGDH/NNMT/FAH/PSMA6/ASRGL1/KARS/PSMC4/PSMB9/DDC/PSMD10/PYCR2/LIPT1/SRM/QDPR/PSME2/AFMID/PSMA5/DIO2/ACAD8/GCAT/PSMD7/PSMD13/PSMB5/GLS/BCKDK/GRHPR/PSMD11/SMS/ODC1/PDHA1/BCKDHB/DLST/EPRS/PSME1/GSTZ1/ADO/PSMA2/TXN2/PSMA1/RPS12/PSMC3/DDO…
PROVENZANI_METASTASIS_DN	138	0.389332	1.50392	0.00592194	0.0231178	0.0129546	2444	tags=28%, list=9%, signal=25%	IGFBP3/SAA1/FTL/TIMP2/TGM2/TNFRSF6B/PON2/COL4A2/TNIP1/ANXA6/PDGFC/CCND1/IFITM2/DNAJC2/IFITM3/ATF5/TRIP6/EIF2S1/RCN1/VAMP3/ERCC1/TRIB2/RINT1/NMI/CTSB/MEPCE/PLOD3/HSPA4/TXNL1/MRPL35/PRMT1/COTL1/P4HA2/PSMB9/MT1E/RBM42/ADRM1/DDAH1
REACTOME_APC_CDC20_MEDIATED_DEGRADATION_OF_NEK2A	25	0.533692	1.50357	0.0457778	0.100129	0.0561093	6102	tags=56%, list=21%, signal=44%	CDC20/ANAPC7/BUB3/CDC26/ANAPC4/RPS27A/UBC/UBE2C/UBA52/ANAPC2/MAD2L1/ANAPC5/ANAPC16/ANAPC11
ADDYA_ERYTHROID_DIFFERENTIATION_BY_HEMIN	72	0.42973	1.50284	0.0161611	0.0475053	0.0266206	4439	tags=46%, list=16%, signal=39%	AKR1C1/AKR1C2/CXCL8/NQO1/FTH1/TXNRD1/INSIG1/MAFG/ATF3/CXCL2/ATF5/DNAJB4/NLRP1/IER5/JUN/HERPUD1/IER3/SLC43A3/CPOX/CREM/DDIT4/PTP4A3/FDXR/KLF1/AAK1/RTN4/CEBPB/FCGR2A/ICAM3/HSPA5/ETV5/BIRC5/HSPA1B
AMUNDSON_RESPONSE_TO_ARSENITE	211	0.368509	1.50257	0.00202371	0.0106037	0.00594199	4235	tags=33%, list=15%, signal=28%	RIT1/DNTTIP2/ME1/PLOD1/HEXA/SERPINH1/DNAJA1/BAG2/TIMM17A/MT1F/MAFG/ATF3/VEGFA/DNAJB4/DLC1/CHERP/CTSA/ZMYND8/UBXN8/GLA/STC2/HIST1H2BD/STK10/AP4B1/RELB/TBL1X/TNFRSF10B/PRNP/RPS6KC1/DNAJB5/STK17A/HSPA13/ESRRA/NEU1/E2F6/POLR1C/HSPA4/HYAL2/CLEC2B/GRN/SLC22A1/HMBS/ATP6V0E1/MR1/MT1X/MT1E/MLLT11/AHSA1/ST3GAL5/CCT8/BCL3/BCAS2/TFE3/CNPY2/GARS/FJX1/PFDN5/EIF2S2/CARS/DDIT3/HSPE1/LYN/RCC1/CEBPB/LRMP/LAMTOR3/I…
SMITH_TERT_TARGETS_UP	145	0.386654	1.50121	0.00517288	0.0208551	0.0116866	2521	tags=26%, list=9%, signal=23%	FERMT2/NFIL3/UFM1/TNC/DAP/FGF2/ATF3/CXCL2/XBP1/EIF2S1/G6PD/PTGS2/DDX10/MTHFD2/CCNH/CCDC85B/ZNF274/TOMM34/IL13RA2/TOP1/AIMP1/GNL2/PYCR1/DUSP1/PIGH/AARS/SRP19/HERPUD1/EPHA2/GTF2E2/MCFD2/NEK3/GSS/CYC1/COMMD1/UBE2S/PSMD7
NABA_SECRETED_FACTORS	229	0.364651	1.50027	0.000589623	0.00424528	0.00237894	2984	tags=22%, list=10%, signal=20%	S100A8/S100A9/CXCL8/TNFSF9/AREG/TNFSF14/PPBP/WNT5A/IL1A/IL1B/GDF15/EPGN/S100A4/PDGFC/CSF3/CXCL1/FGF2/CXCL2/VEGFA/CCL20/PGF/FSTL1/CXCL3/NRG4/BDNF/FGF5/EGF/BTC/ANGPTL4/LIF/FLG/BMP6/TCHH/CCBE1/FSTL3/WNT10B/CSF1/S100A6/TNFSF4/HRNR/AMH/HHIP/VEGFC/TGFA/IL12A/HBEGF/PF4V1/FGF13/PSPN/FLT3LG
REACTOME_TELOMERE_MAINTENANCE	76	0.424392	1.49943	0.0155155	0.0463195	0.0259561	4328	tags=30%, list=15%, signal=26%	HIST1H2AC/HIST1H2BK/HIST2H2AA4/HIST1H2BG/POLE3/HIST1H2BD/HIST2H4A/DKC1/FEN1/HIST1H2BN/RUVBL2/HIST2H2BE/WRAP53/H2AFX/RUVBL1/TERF2IP/HIST1H2BJ/POLE4/H2AFZ/RFC3/POLD2/HIST1H2BC/TERF2
IRITANI_MAD1_TARGETS_DN	41	0.47726	1.49865	0.0314685	0.0772736	0.0433019	8412	tags=59%, list=30%, signal=41%	GPAM/ASS1/WDR74/RARS/LONP1/MYBBP1A/SRM/HNRNPH2/SLC5A6/CDK1/BABAM1/SLC16A1/EEF1G/APEX1/POLD1/GPI/NME2/RPL13/RPL22/MRPS18B/DCTPP1/HSPA9/METTL26/RPL18
DITTMER_PTHLH_TARGETS_UP	112	0.398711	1.49778	0.00907206	0.0313678	0.0175776	5396	tags=43%, list=19%, signal=35%	AREG/COL4A2/PRSS23/TNIP1/FLOT1/PDGFC/LTBP1/TIMM17A/ARF4/AP2M1/PLAU/VDAC2/TYMS/CYCS/PTS/CKS2/SRSF3/DUSP5/RAB13/AP1S1/HAX1/USP15/ATP2B1/MARCKS/ANXA5/SF3B3/TPI1/LIPA/GRHPR/AP2S1/UROD/TSC22D1/ANXA7/CDK1/H2AFZ/SRSF10/SFPQ/NDUFA13/IMMT/UBE2C/RBX1/BHLHE40/ATP5F1A/PEG10/B4GALT3/CDCP1/LAMP1/BSG
BROWNE_HCMV_INFECTION_48HR_DN	425	0.343201	1.49716	0.000348797	0.00296587	0.00166199	2984	tags=23%, list=10%, signal=21%	IGFBP3/CFH/LOX/LGALS3BP/ROS1/ASPH/HAS2/AOX1/TGFBI/PDGFRL/C3AR1/MUC1/FGFR1/MAP1B/FN1/SERPINH1/SVEP1/TAGLN/FAP/FBLN5/LZTS3/CCND1/IFITM2/ABCA6/ESM1/AR/SPRYD7/DOK1/IFI35/LAMB1/FADS1/SOCS3/PSMB8/SDC2/SLC22A18/SLCO2A1/CCDC85B/CPSF6/EMP3/ITPKA/BTN3A2/NR1H3/LOXL2/PRAF2/PLAUR/SPG7/UBA7/STK17A/IQSEC3/DUSP1/PTGIR/RIOX2/CDH16/GABPB1/STAT1/JUN/HSPA4/ZFP36L2/PRR3/ETV1/KCNK3/DCTN1/PTPRO/FAM214B/IGFBP4/PLXNC1/TM…
REACTOME_KERATAN_SULFATE_BIOSYNTHESIS	26	0.524949	1.49565	0.047193	0.102249	0.0572973	2372	tags=27%, list=8%, signal=25%	CHST2/ST3GAL3/ST3GAL2/OMD/CHST1/B3GNT2/B4GALT6
PID_TAP63_PATHWAY	53	0.453537	1.49524	0.0241742	0.0639353	0.0358275	1667	tags=28%, list=6%, signal=27%	IGFBP3/CDKN1A/PMAIP1/MFGE8/AEN/NQO1/GDF15/GADD45A/MDM2/PML/TP53I3/BAX/NOC2L/SSPO/OGG1
REACTOME_CELL_CYCLE_CHECKPOINTS	284	0.35609	1.49519	0.000627549	0.00446582	0.00250252	5175	tags=32%, list=18%, signal=27%	CDKN1A/MDM2/UBE2V2/MAPRE1/HIST1H2BK/GTSE1/ZWINT/MCM8/HIST1H2BG/PSMB8/PSMC5/SGO2/HIST1H2BD/HIST2H4A/CDC20/PSME3/MAD1L1/B9D2/SEH1L/YWHAG/CLSPN/ANAPC7/PSMB10/BUB3/NSL1/DYNLL1/NUDC/PSMA6/PSMC4/PSMB9/PPP2CB/BABAM2/PSMD10/HIST1H2BN/PSME2/PSMA5/HIST2H2BE/CDC26/DYNC1LI1/PSMD7/KIF2C/PSMD13/PSMB5/PHF20/PSMD11/H2AFX/CENPK/PSME1/CENPS/NUP43/ANAPC4/PSMA2/PSMA1/HIST1H2BJ/PSMC3/CDK1/SPDL1/RFC3/BABAM1/CHEK2/CENP…
YAGI_AML_FAB_MARKERS	183	0.373424	1.49487	0.00225925	0.0114269	0.00640333	2374	tags=21%, list=8%, signal=20%	CFH/PLOD2/SERPINE2/PROS1/AKR1C1/TIMP2/TGM2/BAMBI/TXNRD1/SERPINH1/STAT4/BAG2/GOSR2/ACO1/DLC1/F2R/FADS1/ZMYND8/UBXN8/AMD1/CASP1/MAN1A1/PIM2/DLEU1/DEAF1/ITGB3/TRIB2/ELOVL5/TYMP/PNN/PAQR3/ADAMTS3/IFI30/LCP1/SLC25A1/MAX/MLLT11/CTR9/CYB5B
AGUIRRE_PANCREATIC_CANCER_COPY_NUMBER_UP	295	0.354282	1.49439	0.000634921	0.00450779	0.00252604	3860	tags=31%, list=14%, signal=27%	HAS2/PON2/DUSP3/CABYR/HIF1A/ID1/GRWD1/SNX6/SNAPC1/BAX/MLX/NSF/CRCP/UTP18/TPD52L2/PSME3/ZNF787/MAD1L1/CD3EAP/PSMC3IP/SLC12A9/SCFD1/PRPF6/PLEKHA4/ADGRA2/PLOD3/GSDMD/PCNX4/RSAD1/FAM49B/EXOSC4/BECN1/THEM6/NUDC/UPF3A/AOC2/BRD9/ZGPAT/WDR3/AARSD1/CREB3/UBE2Z/PRMT1/PON3/CMAS/NOSIP/ACTR10/GRN/HGH1/PVT1/CLTA/SLC52A2/PRELID3B/BRF2/TPM2/ATP5F1E/NUP62/RUVBL2/SLC39A4/DPF1/CYC1/HNRNPL/ATP5MC1/KRT10/PHB/YTHDF1/X…
ENGELMANN_CANCER_PROGENITORS_DN	63	0.437314	1.49375	0.0199416	0.0550713	0.0308604	798	tags=21%, list=3%, signal=20%	OSGIN1/AKR1C1/AKR1C2/AKR1C3/MAFB/SYBU/UGDH/FN1/ABCC3/ID1/CLIC3/HS3ST3A1/SLC35C1
REACTOME_SYNTHESIS_OF_BILE_ACIDS_AND_BILE_SALTS	31	0.503761	1.49312	0.0396717	0.0906612	0.050804	318	tags=13%, list=1%, signal=13%	AKR1C1/AKR1C2/AKR1C3/HSD3B7
BALDWIN_PRKCI_TARGETS_UP	40	0.477264	1.4916	0.0331172	0.0792056	0.0443845	2145	tags=25%, list=8%, signal=23%	CBX6/CCN3/TGOLN2/SDC2/TRIB2/CCN5/TDO2/AQP9/IFITM1/SELENOP
BIOCARTA_FAS_PATHWAY	30	0.505564	1.49137	0.0423748	0.0950637	0.053271	2477	tags=33%, list=9%, signal=30%	CASP8/DFFA/DAXX/JUN/MAP3K7/ARHGDIB/FADD/CASP7/FAS/LMNB1
NAKAMURA_METASTASIS_MODEL_DN	42	0.473133	1.49078	0.0321823	0.0781238	0.0437784	787	tags=21%, list=3%, signal=21%	C3/PID1/ALDOC/SLCO4A1/FAM83A/RUNX2/FABP5/LDLR/POLM
JOHNSTONE_PARVB_TARGETS_3_UP	427	0.341623	1.49051	0.00034965	0.00296587	0.00166199	2987	tags=25%, list=10%, signal=22%	C3/HMOX1/VIM/C1S/AKR1C1/LGALS3BP/SQSTM1/AKR1C3/PTGR1/PMAIP1/TIMP2/TGM2/AREG/TGFBI/DMBT1/VPS18/HPCAL1/FGFR1/FN1/ICAM1/SPAG4/TNIP1/S100A4/ABCC3/ENO2/CCND1/SNTB1/SEZ6L2/MVP/GFPT2/HTATIP2/IFITM3/SRPX/TOX2/CLIC3/PSAP/ALDH3B1/LDLR/IFI35/PLAU/CTSA/FADS1/GDI1/RCN1/TOGARAM2/WLS/LYRM1/LIF/SLC17A5/NR1H3/LOXL2/HLA-B/MGST1/CMTM3/ECE1/PRNP/NLRC5/P4HB/PTX3/ACSL5/KCTD2/CTSB/SUPT5H/MLEC/TGFBR2/CSF1/PNMA2/FXYD5/AP…
ROZANOV_MMP14_TARGETS_UP	248	0.359455	1.49036	0.000605694	0.00435076	0.00243804	2848	tags=29%, list=10%, signal=27%	PLOD2/LGALS3BP/ALDOC/PTGR1/HAS2/PMAIP1/HCLS1/PLK2/PDGFRL/NXN/COL4A2/IL32/IL1R1/HSD11B1/P3H1/FN1/SERPINH1/TAGLN/MYRF/ENO2/IFITM2/HIF1A/APOL3/NCF2/CD83/MRPL42/DOK1/CCL20/SLAMF7/PLCB4/SERPINA5/APMAP/LAMB1/SLCO2A1/HIST1H2BD/HIST2H4A/MKKS/TMEM44/GBP3/COL4A1/NR1H3/ZG16B/HLA-B/TAF12/TMEM45A/TDO2/ALPK2/SMOX/GPR162/HERPUD1/RWDD2B/NNMT/TPM3/SEPT6/RBPMS2/IFITM1/PYROXD2/SHLD1/CA12/DDIT4/HHIP/TNFRSF11B/HTRA3/…
BHAT_ESR1_TARGETS_NOT_VIA_AKT1_UP	197	0.368467	1.49031	0.00310296	0.0143647	0.00804957	2431	tags=28%, list=9%, signal=26%	OSGIN1/LRG1/MED24/SLC22A5/COLGALT1/SYBU/TGM2/IFRD1/SCNN1B/MAT2A/UNC5A/SH2D2A/PRSS23/GPATCH4/POP1/NIP7/CCND1/TSKU/RAB3IL1/MFSD2A/XBP1/NOL6/NEIL2/PPRC1/PHLDA2/STC2/TENT5C/HK2/ISG20L2/TMEM104/TRMT61A/GNL2/SNX24/E2F6/SMOX/CYP4F11/PIP4K2A/MYBBP1A/RCL1/IGFBP4/UBIAD1/RPP40/NOLC1/RRP12/MLPH/GREB1/CA12/SYTL4/SRM/SH2B2/GINS3/MYEOV/NXT1/WDR46/SLC25A19
YAO_TEMPORAL_RESPONSE_TO_PROGESTERONE_CLUSTER_6	73	0.42492	1.49027	0.0174129	0.0501729	0.0281154	1739	tags=23%, list=6%, signal=22%	C3/SAA1/MED24/CDKN1C/IFIT3/PRSS23/ME1/PAM/IFIT2/EFNB2/F3/WLS/PRNP/LTF/CDH16/ZFP36L2/CFD
DIRMEIER_LMP1_RESPONSE_LATE_UP	54	0.450172	1.48982	0.025204	0.0656936	0.0368128	4363	tags=41%, list=15%, signal=35%	HMOX1/SQSTM1/ADGRE5/TNIP1/STIP1/MTHFD2/NFKB2/SRRT/VOPP1/ANP32A/MARCKS/TRIP10/CSNK1D/GARS/PIEZO1/CARS/LYN/ETF1/TUBB2A/HSD17B10/SLC20A1/NBN
REACTOME_GENE_SILENCING_BY_RNA	125	0.390611	1.48906	0.00844773	0.0299371	0.0167759	5372	tags=33%, list=19%, signal=27%	HIST1H2AC/HIST1H2BK/HIST2H2AA4/HIST1H3G/PLD6/HIST1H2BG/HIST1H2BD/HIST2H4A/SEH1L/NUP54/HIST1H2BN/NUP62/HIST2H2BE/HSP90AA1/HIST1H3H/H2AFX/FKBP6/POLR2G/NUP35/POLR2K/POLR2C/NUP43/HIST1H2BJ/TSN/H2AFZ/POLR2L/RAN/POLR2I/NUP93/TARBP2/DROSHA/POLR2D/POLR2H/HIST1H2BC/POLR2F/MYBL1/POLR2B/MOV10L1/POLR2E/HIST1H4A/NUP98
LU_EZH2_TARGETS_DN	379	0.34466	1.48898	0.000673401	0.00470458	0.00263631	2999	tags=24%, list=11%, signal=22%	IGFBP3/LHFPL6/PAPSS2/ASPH/GLRX/SLC22A4/SERPINH1/LIMCH1/RPS6KA2/SLC16A9/ESM1/SDCBP/MGAT2/SRPX/SSR3/SCO1/TACC2/ACO1/PLAU/FSTL1/TMEM17/LAMB1/TNFAIP3/NBEA/HK2/CRCP/UTP3/CPSF6/VKORC1/RUNDC1/NSUN2/COL4A1/ADAMTS1/BACE2/RAB5IF/MAGED1/CRK/MSANTD2/KPNA2/CREB5/TAP2/RTCA/BMP6/STAMBPL1/FBN2/BLZF1/NIPA2/CHCHD3/SNAPC3/NEU1/TGFBR2/CCBE1/ALPK2/MOK/NABP1/SLC35E1/TRIM13/LRP8/RECK/SHISA2/PBK/ASRGL1/DDX51/CHRNA5/RPIA…
REACTOME_GLUCONEOGENESIS	29	0.508928	1.48887	0.0464221	0.101176	0.0566964	2624	tags=31%, list=9%, signal=28%	ALDOC/ENO2/GAPDH/PGK1/ENO1/ALDOA/SLC25A1/PGAM1/TPI1
PID_IL1_PATHWAY	34	0.491919	1.48852	0.0369097	0.0856282	0.0479836	1697	tags=29%, list=6%, signal=28%	SQSTM1/IL1A/IL1R1/IL1B/IKBKG/CASP1/IL1R2/TICAM2/JUN/MAP3K7
BLUM_RESPONSE_TO_SALIRASIB_DN	338	0.347506	1.48774	0.00097056	0.00611093	0.00342439	4948	tags=33%, list=17%, signal=28%	PLOD2/AKR1C1/SLC39A8/CHN1/PRSS23/CEMIP2/ID1/AURKA/SRSF7/ENC1/ZWINT/NR2F1/FOS/F2R/HS3ST3A1/RGS5/CDC20/CDKN2C/KPNA2/PFKFB3/TACC3/TYMS/PSMC3IP/ENO1/FOSB/PKM/TSPAN7/CCND3/IRS1/PRPS1/LDHA/MOK/CKS2/SRRT/SRSF3/PBK/ANP32A/TLE2/FEN1/HSPA14/HDAC1/RGS2/TPX2/CYB5A/GUCY1B1/PRDX3/RBM14/IQGAP2/PRC1/VDAC3/WWTR1/KIF2C/PGAM1/SMC4/HSP90AA1/TPI1/SPANXA1/DDX23/TFE3/CD37/CNN3/SGPP1/NME4/CDK1/TUBB4B/H2AFZ/RFC3/TOP2A/SR…
PID_ILK_PATHWAY	43	0.469127	1.48757	0.0317274	0.0774827	0.0434191	2824	tags=28%, list=10%, signal=25%	ZEB1/SNAI1/CCND1/AURKA/TACC3/JUN/CDC37/ZYX/RUVBL2/HSP90AA1/MYL9/RUVBL1
PID_P53_DOWNSTREAM_PATHWAY	133	0.386003	1.48743	0.00687649	0.0258641	0.0144935	2661	tags=29%, list=9%, signal=27%	IGFBP3/CDKN1A/TNFRSF10D/TIGAR/PMAIP1/EDN2/GDF15/GADD45A/AFP/MDM2/PML/BNIP3L/E2F3/ATF3/TP53I3/RPS27L/BAX/CASP1/LIF/CEBPZ/PLK3/TNFRSF10B/BCL2L1/TRIAP1/DUSP1/AIFM2/TNFRSF10A/JUN/RRM2B/TAF9/EPHA2/PRMT1/DUSP5/MAP4K4/DDIT4/FAS/TGFA/SMARCA4/FDXR
MCBRYAN_PUBERTAL_BREAST_6_7WK_DN	69	0.427666	1.48505	0.0175222	0.0502983	0.0281857	3557	tags=35%, list=12%, signal=31%	PLOD2/S100A8/SERPINA3/IFIT3/AREG/PAM/TAGLN/ACTA2/TNC/FBLIM1/F3/F2R/CDC20/UGT8/NR1D1/LY6D/SNRNP27/TOB2/BPGM/PALLD/TNFRSF12A/SLPI/CDK1/ATP5MD
REACTOME_PLATELET_ACTIVATION_SIGNALING_AND_AGGREGATION	236	0.36	1.48386	0.00120228	0.00721371	0.00404236	2391	tags=18%, list=8%, signal=16%	SERPINA1/SRGN/PROS1/LGALS3BP/SERPINA3/PCDH7/PPBP/F2RL2/QSOX1/FN1/HABP4/PSAP/DGKI/VEGFA/CYB5R1/TOR4A/F2R/GNG11/ITPR1/EGF/CALU/ITGB3/CRK/GRB2/ABHD6/MGLL/PRKCQ/TMSB4X/FAM49B/PRKCE/CFD/GNG2/ALDOA/RAP1B/GAS6/PCYOX1L/DGKD/SYTL4/SELENOP/PTPN1/VEGFC/FLNA
BOYAULT_LIVER_CANCER_SUBCLASS_G123_UP	45	0.464761	1.48337	0.0315465	0.0772736	0.0433019	5582	tags=51%, list=20%, signal=41%	PON2/FABP5/CPSF6/ISG20L2/KPNA2/CKAP4/DUSP12/PNMA1/CCT3/SMC4/CACYBP/MRPL9/RBM3/VIL1/GINS1/SNRPE/SUCO/PRKDC/ACLY/SNRPD1/PEG10/PLCB1/SHC1
SMID_BREAST_CANCER_ERBB2_UP	127	0.388415	1.48211	0.00851064	0.0300375	0.0168322	1250	tags=17%, list=4%, signal=16%	ABCC2/S100A8/KYNU/S100A9/SQSTM1/MED24/PAPSS2/ASPH/NQO1/AKR1B10/MUC1/MMP15/ABCC3/TSKU/AR/CLIC3/LDLR/G6PD/GALNT6/P4HB/ASS1
REACTOME_CHEMOKINE_RECEPTORS_BIND_CHEMOKINES	31	0.499207	1.47962	0.0446876	0.0984479	0.0551674	673	tags=19%, list=2%, signal=19%	CXCL8/PPBP/CXCL1/CXCL2/CCL20/CXCL3
LEE_CALORIE_RESTRICTION_NEOCORTEX_DN	62	0.434697	1.47954	0.021137	0.0576979	0.0323322	4744	tags=42%, list=17%, signal=35%	ALOX5AP/TFRC/PML/EIF2S1/COL4A1/KIF5B/PRPF6/BUB3/HIST1H1C/CALM3/CHKA/GNG2/ZYX/RBM4/PHKG2/EIF4A1/H2AFX/EEF1D/POLR2G/EPRS/FZD5/SKP1/ATP5PB/CYP19A1/RAP2B/ACLY
REACTOME_PERK_REGULATES_GENE_EXPRESSION	31	0.499151	1.47946	0.0446876	0.0984479	0.0551674	5132	tags=55%, list=18%, signal=45%	CXCL8/ATF3/EIF2S1/EXOSC4/HERPUD1/EXOSC9/EXOSC2/EXOSC3/ATF4/EIF2S2/DDIT3/EXOSC8/EXOSC5/HSPA5/EXOSC6/EXOSC1/ATF6
PAL_PRMT5_TARGETS_UP	192	0.367239	1.47892	0.00394477	0.0169537	0.00950035	5045	tags=39%, list=18%, signal=32%	PROS1/C1R/PCDH7/HAS2/TGFBI/NOP58/PNP/NR2F1/FSTL1/AMD1/NCBP2/EMP3/CDC20/WLS/KPNA2/TACC3/TYMS/ANP32E/HSPA4/CALM3/CKS2/HELLS/ECH1/EHMT2/CUEDC2/SF3A3/MRPL18/GCAT/MARCKS/HNRNPL/MRPL20/ECHS1/PSMB5/NME1/ODC1/H2AFX/TUFM/RBM3/NUP35/WTAP/GSTZ1/LAGE3/PSMC3/UBE2M/CKS1B/U2AF2/LUC7L3/TUBB2A/NDUFA13/SPCS2/YWHAB/SERF2/SLIRP/PCLAF/POSTN/TARDBP/SET/P3H3/ANP32B/APEX1/ERH/SRSF6/LARP7/CYP1B1/PPA2/UBE2E3/CTBP1/RXYLT1/…
RASHI_RESPONSE_TO_IONIZING_RADIATION_4	45	0.463312	1.47875	0.0320209	0.0778886	0.0436466	5944	tags=40%, list=21%, signal=32%	IL7R/IFIT3/IL27RA/SP140/YWHAG/SRP19/CA8/SF3A3/BASP1/H2AFX/KNOP1/RGS19/CPS1/DNAAF5/MFSD1/JPH3/HMGCS1/GPC4
GREGORY_SYNTHETIC_LETHAL_WITH_IMATINIB	135	0.383114	1.47804	0.00717322	0.0266384	0.0149274	4696	tags=33%, list=16%, signal=28%	PLOD2/ALDOC/IL27RA/UTP14A/SAT1/MGAT2/GAPDH/ATF5/FKBP11/SP100/PPP1R2/CRCP/SP110/CAPN6/PRKCQ/CTSB/TNFRSF9/PDLIM5/INTS6L/SEPT6/CUX1/CLTA/GGCX/MBD4/ATP6V0E1/ITGB1/DDAH1/ACSL1/FLT3LG/HIF3A/CARS/RARA/SLC50A1/KCNJ13/IFI16/SKP1/TLE1/TMEFF1/GLIPR1/CXCR4/LAPTM4B/RAP1A/GTF2H5/SYT11/LDLRAD4
MILI_PSEUDOPODIA_CHEMOTAXIS_DN	416	0.339436	1.47804	0.000686813	0.00474294	0.00265781	4510	tags=30%, list=16%, signal=26%	C1S/ITGA5/LOX/C1R/TNFSF9/COLGALT1/TIMP2/DCBLD1/MSLN/P4HA1/AKR1B10/FGFR1/QSOX1/PVR/P3H1/PLOD1/FN1/ALG1/GPRC5B/PSAP/EDEM2/EMC1/LDLR/F3/FOS/CHPF2/SOCS3/TM9SF1/RIOK1/SLCO2A1/GLA/SLC19A1/NRP1/WLS/COL4A1/DEGS1/SLC39A14/ADAMTSL4/TAP2/PRNP/RRBP1/TPBG/DUSP1/DHX30/FOSB/TOR1B/CTSB/CKAP4/NEU1/SLC12A9/SCFD1/SON/NOC2L/SEC61A1/UBTF/TXNDC5/CHKA/VCP/TYW1/RPAP1/PPT1/CUX1/SLC6A6/ADORA2B/TMEM109/P4HA2/GRN/SIGMAR1/FU…
FULCHER_INFLAMMATORY_RESPONSE_LECTIN_VS_LPS_DN	418	0.339174	1.47794	0.000690131	0.00474294	0.00265781	3925	tags=27%, list=14%, signal=23%	CFB/HMOX1/C1S/IFI44L/IFI44/LGALS3BP/SLC39A8/ADGRE5/MAFB/ZEB2/IFIT3/TGFBI/PDGFRL/BNIP3/C3AR1/GBP1/ME1/TNFAIP6/IFIT1/SAMD9L/CES1/IL15RA/SAT1/UBE2L6/GPX3/IFITM2/FPR1/APOL3/IFITM3/IFIT2/ADGRE2/TRIM22/KCNQ1/P2RY11/SOCS3/SP100/DAPP1/PARP10/HIST1H2BD/WLS/SP110/CPNE8/ENOSF1/DDAH2/RBMS1/PFKFB3/HRH1/NMI/DUSP1/TOR1B/IFI27/PLA2G15/TGFBR2/ZFP36L2/SLC35E1/OASL/OLFML2B/ECHDC1/IFITM1/ZNF665/HIRA/C9orf64/EPSTI1/F…
REACTOME_DISEASES_OF_METABOLISM	87	0.408804	1.47791	0.017848	0.0509468	0.0285491	5330	tags=40%, list=19%, signal=33%	GBE1/SFTPB/GALNS/TBXAS1/CYP27B1/GCLM/MMAA/TPMT/GCLC/RPIA/TALDO1/MMAB/MMADHC/GSS/CD320/FDXR/IDH1/GAA/FDX2/MMACHC/GNS/GYS1/ARSB/RPS27A/UBC/CYP19A1/OPLAH/IDUA/CYP1B1/CYP2R1/CYP27A1/UBA52/GGT1/MTRR/DCXR
AFFAR_YY1_TARGETS_DN	225	0.359901	1.47789	0.0017616	0.00954069	0.00534633	2568	tags=18%, list=9%, signal=17%	SERPINA1/ALOX15B/NSG1/TNFRSF10D/HAS2/CHST2/TGFBI/IL1R1/PCOLCE2/DKK2/DNAJC2/AURKA/IL1RL1/LDLR/SLC22A18/MTHFD2/JMJD6/NIPSNAP1/SHCBP1/TMEM45A/CCN5/B3GAT3/POF1B/ANP32E/ATP6V1E1/PRPS1/RAB27A/HELLS/PTPRO/TCP1/FEN1/FUS/DUSP9/IDI1/TRIB3/LMNB1/MSMO1/MRPL52/PRC1/PTGS1/KIF2C
BOYLAN_MULTIPLE_MYELOMA_D_CLUSTER_UP	26	0.518695	1.47783	0.0534556	0.112577	0.0630849	2673	tags=42%, list=9%, signal=38%	TNFRSF10D/PLK2/CCND1/STC2/OBSCN/N6AMT1/CLYBL/EIF5/ISL1/GSTO1/ACTR3B
NAKAMURA_CANCER_MICROENVIRONMENT_DN	46	0.460748	1.47583	0.0306705	0.0758704	0.0425156	3691	tags=35%, list=13%, signal=30%	SLC7A11/PSAT1/TXNRD1/AURKA/CDC20/CDCA2/PSPH/TCP1/COTL1/TARS/PA2G4/KIF2C/USP39/NDUFA9/CARS/SPAG5
SAKAI_TUMOR_INFILTRATING_MONOCYTES_DN	79	0.414701	1.47312	0.0189681	0.0531511	0.0297843	4670	tags=39%, list=16%, signal=33%	IFI6/DNAJA1/CSTF2/CPSF6/CDC73/AK6/PRDX1/TXN/PTGES3/GLRX2/CCT4/GEMIN4/LSM6/IFI30/PSMA5/PRDX3/CCT8/SUB1/RBM8A/PSMB5/PRDX6/ERO1A/DDX20/TOP2A/SNRPB2/RAN/CD63/PPIC/HSPA5/UBE2E3/COPS5
URS_ADIPOCYTE_DIFFERENTIATION_DN	31	0.496885	1.47274	0.0469676	0.102169	0.0572524	278	tags=16%, list=1%, signal=16%	DCN/OSGIN1/LOX/COL4A2/FN1
MCBRYAN_PUBERTAL_TGFB1_TARGETS_UP	155	0.375599	1.47269	0.00551572	0.0218628	0.0122513	3738	tags=28%, list=13%, signal=25%	PLOD2/COL8A1/CDKN1A/HAS2/MFGE8/TIMP2/TGM2/WNT5A/TNFAIP6/FN1/TAGLN/ACTA2/CEMIP2/PDGFC/TNC/FABP5/VEGFA/F3/F2R/CRK/IER5/LTF/CA8/IER3/S100A6/HK1/HTRA1/COTL1/BASP1/TPM2/AK2/CYC1/ARL4A/BPGM/PLAT/CD14/CNN3/TSC22D1/EHD1/HES1/OGFR/EPB41L2/SFPQ/RAB5C
FAELT_B_CLL_WITH_VH3_21_UP	41	0.468513	1.47118	0.037296	0.086334	0.0483791	4246	tags=44%, list=15%, signal=37%	KCNAB2/SLC25A42/PPP5C/YKT6/TYMS/UBTF/VCP/FAM214B/PTPN1/VDAC1/ZBTB48/POR/BCR/CLUH/E2F4/PRKCSH/EIF4G1/CALR
JACKSON_DNMT1_TARGETS_UP	75	0.416753	1.47053	0.0207241	0.0568927	0.031881	2185	tags=24%, list=8%, signal=22%	CDKN1A/IFIT3/FGFR1/HIF1A/TGOLN2/BIN1/SOCS3/PTGS2/TDG/EIF3A/CEBPZ/PHLDA1/PROCR/CSF1/ISG15/EPHA2/HSPH1/ENG
CHEN_LVAD_SUPPORT_OF_FAILING_HEART_DN	36	0.479613	1.47028	0.0432891	0.0964781	0.0540636	3490	tags=39%, list=12%, signal=34%	S100A8/TGFBI/IFIT1/PDE4B/TM4SF1/PLAU/NRP1/CTSB/PTGER4/MARCKS/CD14/IDH1/HEY2/CRYM
REACTOME_SIGNALING_BY_THE_B_CELL_RECEPTOR_BCR	108	0.393287	1.47015	0.0123999	0.039198	0.0219655	7048	tags=51%, list=25%, signal=38%	IKBKG/PSMB8/DAPP1/ITPR1/PSMC5/PSME3/GRB2/PSMB10/PSMA6/MAP3K7/ORAI1/PSMC4/PSMB9/PSMD10/PSME2/PSMA5/PSMD7/PSMD13/PSMB5/NCK1/PSMD11/PSME1/PSMA2/FKBP1A/PSMA1/PSMC3/LYN/RPS27A/PSMD2/SKP1/BTK/UBC/PSMD4/PSMC2/PSMB6/PSMA7/PSMD12/PSMD14/PSMB4/UBA52/PSMB3/PSMA3/PSMC6/PSMB7/NFKBIE/NFKBIB/PSMB1/CHUK/PSMB2/RELA/CD79A/PIK3R1/NFKBIA/PSMD1/SEM1
CHEN_HOXA5_TARGETS_9HR_UP	222	0.358698	1.46971	0.00176783	0.0095575	0.00535575	3945	tags=29%, list=14%, signal=25%	CXCL8/BIRC3/PMAIP1/IFRD1/NFIL3/SAT1/LIG4/DNAJC2/ATF3/VEGFA/NOC3L/F3/FOS/TNFAIP3/PTGS2/TDG/GEM/TAF1A/VCPKMT/MTHFD2L/CHAC1/ZNF274/LRIF1/STC2/LIF/IER2/RELB/TNFRSF10B/CREB5/HRH1/PRPF38B/FOSB/AKIRIN1/TNFRSF9/JUN/NEMF/PRKRIP1/ODR4/PSPC1/DUSP5/KLF10/RABGGTB/BTN2A1/CREM/EIF5/SREK1/ZNF131/NRBF2/PRPF3/TAF1D/POLR3F/SPATA5L1/PPIG/DCLRE1C/TSC22D1/CARS/KIN/SRSF10/GADD45B/SFPQ/CEBPB/IFI16/TMEFF1/GAD1
DANG_REGULATED_BY_MYC_UP	68	0.424611	1.4695	0.0229064	0.0614856	0.0344548	4511	tags=46%, list=16%, signal=38%	TFRC/TXNRD1/UAP1/SURF6/SRSF7/VARS/UMPS/ZNF330/WDR12/RRP9/TOP1/TYMS/TXN/FEZ2/WDR3/SLC25A4/SMN1/SRM/RUVBL2/VDAC1/TBL3/ZNF239/HOMER1/TRAF2/SRSF2/TARBP1/SLC20A1/SLC16A1/TXNL4A/UBE2C/CLPB
WARTERS_RESPONSE_TO_IR_SKIN	78	0.414954	1.4692	0.0181956	0.0516499	0.0289431	1423	tags=21%, list=5%, signal=20%	CDKN1A/TIGAR/PAPPA/TGFBI/FBXO22/GDF15/MDM2/CABYR/TRIM22/DNAJB4/RPS27L/TMEM120B/TMEM173/C12orf45/TRIAP1/RRM2B
LU_IL4_SIGNALING	84	0.408352	1.46815	0.0181543	0.0515805	0.0289042	2803	tags=24%, list=10%, signal=22%	SLC39A8/PMAIP1/GSR/NFIL3/SAMSN1/QSOX1/STAT4/NCF2/SEL1L3/XBP1/TNFAIP3/MGLL/SOCS1/MOK/GNG2/VEGFC/NEK6/CCN2/BCKDK/GNAS
GENTILE_UV_RESPONSE_CLUSTER_D2	36	0.4789	1.4681	0.0442052	0.097737	0.054769	1854	tags=25%, list=7%, signal=23%	HAS2/MAT2A/MAP1B/ID1/TNFAIP3/BDNF/EIF4E/PNN/DUSP5
YANG_BCL3_TARGETS_UP	299	0.347871	1.46805	0.000957854	0.00604337	0.00338653	4432	tags=30%, list=16%, signal=26%	MME/C1R/TNFSF9/SYBU/IFIT3/TGFBI/VLDLR/APOL2/GLRX/B3GNTL1/DGAT2/TNFAIP6/LIMCH1/GPAM/UBE2L6/PIMREG/AURKA/IFIT2/DECR1/IFI35/PSMB8/PPRC1/JADE1/ANGPTL4/CDC20/SP110/GBP3/BACE2/CDKN2C/SCLT1/ACOT2/TACC3/CLMP/UBA7/NMI/NR1D1/EPHA3/TGFBR2/CDCA2/RAB15/SERPINB2/OASL/NR4A1/SEPT4/PBK/AGPAT4/DTX3L/TNFSF4/PSMB9/THOC2/GCFC2/NDUFB5/THBD/CERS4/PRC1/KIF2C/MMP3/PLAT/TNFRSF21/TGFBR3/MYL9/GPAT4/SERPINB1/SMIM15/NPY1R/KRT…
TURASHVILI_BREAST_LOBULAR_CARCINOMA_VS_LOBULAR_NORMAL_DN	69	0.422657	1.46766	0.0207305	0.0568927	0.031881	1339	tags=20%, list=5%, signal=19%	COL8A1/IFI44/LOX/FBN1/COL4A2/ADAM12/FN1/COL12A1/SRPX/LAMB1/COL4A1/TACC3/TYMS/BGN
MAHAJAN_RESPONSE_TO_IL1A_UP	70	0.421393	1.46711	0.0220243	0.0596409	0.0334211	2840	tags=31%, list=10%, signal=28%	IL7R/SOD2/IL1B/NRCAM/IL15RA/STAT4/AR/CXCL2/CCL20/BEST1/CXCL3/PIM2/DUSP1/STAT1/FSTL3/SERPINB2/OASL/SECTM1/RIPK1/PTP4A3/HBEGF/BAK1
LIN_MELANOMA_COPY_NUMBER_DN	41	0.467104	1.46676	0.0400932	0.0912837	0.0511528	6170	tags=49%, list=22%, signal=38%	PAPSS2/B2M/NUFIP1/SPART/EIF3J/PFKP/MED4/CLN5/PRKN/SAP18/SUCLA2/SERF2/TXNL4A/ALG5/ATP5MPL/CRYL1/FNDC3A/KPNA3/PTEN/MFAP1
REACTOME_O_GLYCOSYLATION_OF_TSR_DOMAIN_CONTAINING_PROTEINS	36	0.478312	1.4663	0.0444343	0.0981016	0.0549734	4141	tags=33%, list=15%, signal=29%	ADAMTS12/ADAMTS9/ADAMTS1/ADAMTSL4/SSPO/ADAMTS3/ADAMTS4/THSD4/ADAMTS13/POFUT2/ADAMTS15/ADAMTS5
REACTOME_MITOTIC_G1_G1_S_PHASES	148	0.376127	1.4657	0.00762112	0.0277296	0.0155389	5167	tags=41%, list=18%, signal=34%	CDKN1A/CDKN1C/CCND1/E2F3/MCM8/PSMB8/CCNH/PSMC5/POLE3/PSME3/CDKN2C/TYMS/E2F6/CCND3/PSMB10/PSMA6/PSMC4/PSMB9/PPP2CB/HDAC1/PSMD10/MAX/PSME2/PSMA5/PSMD7/PSMD13/PSMB5/PSMD11/E2F5/PSME1/PSMA2/PSMA1/PTK6/PSMC3/POLE4/CDK1/TOP2A/CKS1B/LYN/E2F4/RPS27A/PSMD2/SKP1/PPP2CA/ORC6/CCNB1/UBC/PSMD4/PSMC2/ORC2/PSMB6/PSMA7/PSMD12/CDC7/PSMD14/GMNN/PSMB4/DBF4/UBA52/PSMB3/PSMA3
REACTOME_PROCESSING_OF_CAPPED_INTRONLESS_PRE_MRNA	28	0.505722	1.46568	0.0522388	0.110394	0.0618617	5666	tags=36%, list=20%, signal=29%	NCBP2/CSTF2/CLP1/FIP1L1/LSM10/SYMPK/SNRPE/CSTF1/SNRPF/CSTF2T
GOLDRATH_ANTIGEN_RESPONSE	319	0.344624	1.46534	0.00161603	0.00900739	0.00504748	4036	tags=27%, list=14%, signal=23%	C3/SERPINA3/GLRX/NFIL3/SP140/GAPDH/RUNX2/IFITM3/AURKA/DENND5A/GTSE1/GNPDA1/F2R/BATF3/MTHFD2/GEM/CASP1/NRP1/IL18R1/EMP3/CDC20/PLEKHB2/CDKN2C/MGST1/KPNA2/TACC3/SH3BGRL/TYMS/PSMC3IP/DUSP1/C4orf3/TXN/BAG3/TNFRSF9/HIST1H1C/IER3/TMEM97/CKS2/TAF9/TMEM30A/ECH1/S100A6/FEN1/POLR3K/CPOX/HMBS/ITGB1/NUP62/MRPL18/SLC39A4/TMEM14C/TMEM126A/PTGER4/LMNB1/PRC1/GCAT/KIF2C/PGAM1/TPI1/CMC2/GSTO1/ODC1/H2AFX/SLC31A1/RBM…
GARGALOVIC_RESPONSE_TO_OXIDIZED_PHOSPHOLIPIDS_TURQUOISE_UP	82	0.409521	1.4653	0.0199697	0.0550713	0.0308604	2437	tags=26%, list=9%, signal=23%	RIT1/SQSTM1/PTGR1/SLC7A11/NMRAL2P/GDF15/MAP1B/DUSP3/CLIC2/SLC25A25/PGF/GCLM/FGFR1OP2/PRNP/DUSP1/GPCPD1/JUN/KLF10/CDC42EP2/PTP4A1/DLGAP1-AS2
BURTON_ADIPOGENESIS_8	75	0.415246	1.46521	0.0224719	0.0605851	0.0339501	2838	tags=27%, list=10%, signal=24%	LOX/KDELR3/PRSS23/ACTA2/PSAP/F2R/CTSA/BDNF/BAX/EMP3/PRAF2/CMTM3/RAB31/TPBG/DAXX/ZFP36L2/ANXA5/PLD3/MAP1LC3B/MSN
REACTOME_TRANSPORT_TO_THE_GOLGI_AND_SUBSEQUENT_MODIFICATION	180	0.366454	1.46521	0.00450831	0.0187184	0.0104892	4092	tags=27%, list=14%, signal=23%	SERPINA1/AREG/TUBAL3/KDELR3/CD59/ARF4/MGAT2/LMAN2L/GOSR2/SEC22B/CAPZA1/NSF/COPG1/MAN1A1/YKT6/COPB1/SCFD1/DCTN6/DYNLL1/DCTN1/TUBA1C/MGAT1/FUT8/ACTR10/MCFD2/BET1L/SEC16A/COPG2/B4GALT6/DYNC1LI1/SAR1B/TGFA/CSNK1D/NAPB/TRAPPC3/TMED9/PREB/F8/COG6/TUBB3/TUBB4B/TRAPPC4/CTSZ/TUBB2A/RAB1A/ARFGAP1/TUBA8/TUBB6
BOQUEST_STEM_CELL_CULTURED_VS_FRESH_DN	29	0.500838	1.4652	0.0518569	0.109739	0.0614944	1739	tags=28%, list=6%, signal=26%	C3/PDGFRL/SERPINA5/SOCS3/OMD/CCN5/FOSB/CFD
LOPEZ_TRANSLATION_VIA_FN1_SIGNALING	34	0.484043	1.46469	0.0437873	0.0971639	0.0544479	4926	tags=41%, list=17%, signal=34%	EFNB2/PPP5C/TGFBR2/ZFP36L2/ANP32A/MMP16/DAPK3/RBM25/EIF5B/EIF3D/SRPRA/IMP3/MCL1/SNRPD1
HORIUCHI_WTAP_TARGETS_DN	310	0.345543	1.46456	0.00128783	0.00757838	0.00424671	5789	tags=37%, list=20%, signal=30%	CDH2/AKR1B1/GSR/MAP1B/CCDC86/POLR3G/PIMREG/AURKA/GTSE1/ASF1A/PGF/TWISTNB/MPP4/PPP1R2/SGO2/PGK1/CDC20/ARHGAP18/HMGA2/TYMS/TOR3A/TMED5/CDCA2/PBDC1/STUB1/CHST1/IPO11/BUB3/LDHA/ULBP2/TMEM97/LRP8/CKS2/HELLS/PBK/APOBEC3B/COQ3/TPX2/TMEM33/FUT11/SRPRB/UQCC2/TFB2M/C11orf58/TIMM50/SNRNP27/B4GALT6/FLNA/UBE2S/LMNB1/PRC1/WWTR1/KIF2C/HSP90AA1/GLS/CCT7/PHB/PAICS/ODC1/H2AFX/TDP2/TMEM64/ATP11C/WTAP/ACAT2/TMEM245/…
KEGG_PARKINSONS_DISEASE	121	0.38597	1.46451	0.0110439	0.035874	0.0201027	7244	tags=58%, list=25%, signal=43%	UBE2L6/VDAC2/UBA7/CYCS/ATP5PD/ATP5F1B/SLC25A4/COX7A2L/SNCA/NDUFB5/ATP5F1E/ATP5MC2/VDAC1/CYC1/VDAC3/NDUFA8/ATP5MC1/UQCR11/PPID/NDUFA9/NDUFV3/PRKN/NDUFA6/ATP5PO/SDHA/UBE2J2/ATP5F1D/ATP5PB/NDUFB2/NDUFS3/COX7A2/NDUFA10/ATP5F1C/NDUFB9/ATP5MC3/NDUFB3/NDUFB1/UQCRQ/NDUFC2/UQCRHL/NDUFA3/COX5B/NDUFS2/NDUFB8/ATP5F1A/NDUFS6/SDHD/UQCR10/NDUFS5/NDUFA4/UQCRB/SLC18A2/NDUFV1/UQCRFS1/NDUFAB1/NDUFS4/COX7C/COX7B/UQC…
JOHNSTONE_PARVB_TARGETS_2_UP	140	0.378094	1.46325	0.00917679	0.0315517	0.0176806	3194	tags=34%, list=11%, signal=30%	AKR1C1/AKR1B1/GRAMD1B/IFIT3/PCOLCE2/TXNRD1/IFIT1/EPHX1/UBE2L6/RAB29/PPP1R9B/IFIT2/SEL1L3/B2M/TNFAIP3/G6PD/GALNT6/HLA-B/BCL2L1/IFI27/PKM/ZNFX1/HLA-A/OASL/CALM3/OGDH/FXYD5/KRT8/ISG15/BRD9/IFITM1/IGFBP4/SLC4A2/COTL1/GREB1/BASP1/ZYX/UAP1L1/SLC25A1/PKN1/FLNA/PLAT/NECTIN2/TFE3/FAM86C1/FKBP1A/DDX60
TAKEDA_TARGETS_OF_NUP98_HOXA9_FUSION_8D_DN	166	0.370199	1.46305	0.00698519	0.0261624	0.0146607	2916	tags=26%, list=10%, signal=23%	PID1/SERPINA1/S100A9/IL7R/PPBP/TGFBI/HSD11B1/ME1/TCERG1/RPS6KA2/CXCL1/FPR1/NCF2/SRPX/ENC1/CXCL3/NRP1/ARHGAP18/IL1R2/CREB5/PRNP/CTSB/TDO2/GLIPR2/JUN/ST8SIA1/RAB30/KRT86/CUX1/HTRA1/PYROXD2/SLAMF8/SLCO2B1/ANTXR1/TMEM33/ADAM19/SOBP/GXYLT2/ADAM9/CD14/SLC30A7/HVCN1/DOCK4
NABA_ECM_REGULATORS	185	0.364758	1.46239	0.00590884	0.0231178	0.0129546	2881	tags=25%, list=10%, signal=23%	PLOD2/SERPINA1/SERPINE2/LOX/SERPINA3/MMP19/ADAMTS12/PAPPA/TIMP2/TGM2/P4HA1/EGLN3/P4HA3/ADAM12/P3H1/PLOD1/SERPINH1/MMP15/ADAM21/CTSO/ADAMTS9/SERPINA5/PLAU/CTSA/ADAMTS1/MMP17/LOXL2/ADAMTSL4/CTSB/PLOD3/SERPINB2/HYAL2/SERPINB8/HTRA1/P4HA2/PAPPA2/MMP16/ADAMTS3/ADAMTS4/ADAM19/HTRA3/MMP3/ADAM9/PLAT/CSTB/ADAM28/SERPINB1
KONDO_PROSTATE_CANCER_HCP_WITH_H3K27ME3	76	0.413869	1.46225	0.021021	0.0574324	0.0321835	2082	tags=20%, list=7%, signal=18%	TRIM16/NRXN3/FBN1/WNT5A/TAF7/LIMCH1/STIP1/MAPT/HOXC5/UTP11/TMX1/ST8SIA1/REXO5/C12orf60/CA12
BOYAULT_LIVER_CANCER_SUBCLASS_G6_UP	62	0.42956	1.46206	0.0257532	0.0666143	0.0373287	3511	tags=31%, list=12%, signal=27%	MME/SLC22A4/HEXA/CEMIP2/TIMM17A/CBR1/CRYZ/SAMM50/TRIB2/MLEC/FBXL5/SEPT4/GREB1/NEK3/UGGT1/FHIT/PREB/SLC5A6/ASPSCR1
PASINI_SUZ12_TARGETS_DN	300	0.3462	1.46089	0.00128041	0.00754924	0.00423038	2957	tags=24%, list=10%, signal=22%	IGFBP3/VIM/PLOD2/CDH2/CDKN1A/LHFPL6/TIMP2/PLK2/PPBP/PRSS23/FN1/SERPINH1/TAGLN/ACTA2/DBN1/TSPAN9/F3/B2M/BDNF/ZMYND8/ACSL4/NPNT/PPP1R18/WLS/LOXL2/RBMS1/CMTM3/PHLDA1/PRNP/SH3BGRL/IER5/DUSP1/GLIPR2/JUN/IRS1/CSF1/IER3/BAZ1A/LRP8/PDLIM5/KRT8/TMEM30A/PRTG/S100A6/GNG2/IGFBP4/PEA15/METRNL/HS6ST2/ITGB1/ZYX/HMGN3/TPM2/IDI1/CMTM7/ELOC/DCBLD2/MLLT11/FLNA/RHOBTB3/PHC2/MARCKS/ANXA5/EID1/WWTR1/EFEMP1/PXDN/HBEGF/…
WAMUNYOKOLI_OVARIAN_CANCER_GRADES_1_2_DN	65	0.425296	1.45934	0.0241082	0.0638712	0.0357916	2554	tags=22%, list=9%, signal=20%	C3/DPYD/CFI/BNIP3/IL1R1/IFITM2/RGL1/ELOVL5/PROCR/PODXL/SNCA/BASP1/C4A/PTGS1
YAGI_AML_RELAPSE_PROGNOSIS	34	0.481997	1.4585	0.045392	0.099595	0.0558102	5262	tags=41%, list=18%, signal=34%	PGD/ATP6V0B/TYMP/TIAL1/ZYX/VDAC1/NME1/GABARAP/CD14/HSPE1/POLR2H/HNRNPD/TSPO/APLP2
REACTOME_CELLULAR_RESPONSE_TO_HEAT_STRESS	99	0.395507	1.45734	0.0177469	0.0508003	0.0284671	4439	tags=32%, list=16%, signal=27%	SERPINH1/BAG2/HSPA8/DNAJC2/SEH1L/HSPA13/PTGES3/BAG3/AKT1S1/HSPA4/VCP/HSPA1A/HSPH1/HSPA14/NUP54/NUP62/MRPL18/HSPA6/RPS19BP1/HSP90AA1/TNFRSF21/HSP90AB1/NUP35/NUP43/DNAJC7/NUP93/MTOR/HIKESHI/ST13/CAMK2D/HSPA5/HSPA1B
WANG_CISPLATIN_RESPONSE_AND_XPC_DN	213	0.356683	1.45697	0.00521135	0.0209825	0.011758	2928	tags=26%, list=10%, signal=24%	CDKN1A/UGP2/MMP19/HAS2/FERMT2/IL1R1/TXNRD1/GADD45A/TNFAIP6/GALNS/TAF7/HIF1A/SDCBP/PNP/UROS/CASP4/EIF2S1/GPC1/SP100/CSTF2/NRP1/CYBA/ARHGEF2/DUSP2/TNFRSF10B/HOXC5/GLIPR2/STAT1/DYRK3/JUN/CSF1/TAF9/PHF11/RFXANK/PNN/TOM1/PNMA1/KLF10/HAX1/CDC42EP2/EIF3G/GEMIN2/MLLT11/SNRNP27/WASHC2A/VEGFC/EIF4A1/DNAJA2/PTGS1/BPGM/TAF11/TRIP10/CNTNAP1/RABEP1/LPCAT4/CD46
MIKKELSEN_NPC_ICP_WITH_H3K4ME3	413	0.334653	1.45647	0.000683527	0.00474294	0.00265781	4305	tags=28%, list=15%, signal=24%	TRIM16L/CD99L2/STC1/MED24/ADAMTS12/ALDOC/ZEB2/SLC7A11/AOX1/NQO1/MPV17/AKR1B10/TOMM40L/LSG1/TNFAIP6/CSRNP3/PML/DLG4/PDE4B/CTSO/PCDH9/IFIT2/RIOK2/RDH11/ZMYND8/GPX8/FASTKD2/TMEM100/RBMS3/WDR12/GAB3/NOL8/SIPA1/ACSBG1/ARHGAP18/DNAJC12/CDKN2C/MGST1/CC2D2A/FLAD1/DECR2/CREB5/SH3BGRL/PYCR1/BLZF1/ZSWIM9/CHAC2/ZC3HC1/SCNM1/ETV1/TIMM21/ECH1/PUS3/IFITM1/MRPL35/AGPAT4/GNG2/SPRED3/NOSIP/GRN/RAB13/ADAL/ZNF276/FK…
STOSSI_RESPONSE_TO_ESTRADIOL	44	0.458557	1.45596	0.0389087	0.0891839	0.0499761	3311	tags=30%, list=12%, signal=26%	CXCL8/BIRC3/PTGS2/IL13RA2/CCN5/BMP6/GREB1/CA12/SELENOP/RHOBTB3/ACOX2/NR4A3/AGT
BROWNE_HCMV_INFECTION_14HR_UP	149	0.372852	1.45444	0.00876472	0.0307006	0.0172037	4187	tags=38%, list=15%, signal=33%	HMOX1/FICD/FOS/PNO1/GCLM/JMJD6/AMD1/ZNF200/TAF1A/GLA/UPF2/POLE3/GRPEL1/ISG20L2/CBARP/FGFR1OP/SLC39A14/TIMM44/ALAS1/BMP6/TOP1/SAFB2/ANP32E/ATP6V0B/NEU1/HERPUD1/BAZ1A/GCLC/HYAL2/SRRT/VCP/PNN/FEN1/RPIA/TARS/SNHG29/MAX/PRPF3/KLHL18/UBE2S/RBM14/HOXB2/TSFM/HIST1H2BJ/FZD5/UBE2M/HES1/DDX39A/LUC7L3/EIF4A3/TSPYL2/RCC1/RGS19/AC092338.1/ZNF263/EIF4EBP3/POLR2H
KOKKINAKIS_METHIONINE_DEPRIVATION_96HR_UP	113	0.386019	1.45259	0.0135065	0.0417473	0.023394	2776	tags=28%, list=10%, signal=26%	IGFBP3/DCN/CDKN1A/CXCL8/DPYD/TIMP2/WNT5A/IL1A/IL1R1/FGFR1/GADD45A/GPX3/FGF2/UMPS/BAX/CASP1/ERCC1/PLAUR/TNFRSF10B/TYMS/TNFRSF10A/BGN/JUN/IGFBP4/POLB/IDI1/MGMT/CASP7/FAS/PLAT/GSTO1/POLG
CASTELLANO_NRAS_TARGETS_UP	64	0.424038	1.45204	0.029347	0.0735478	0.0412141	1777	tags=25%, list=6%, signal=23%	SERPINE2/NPR3/NSG1/NQO1/EPHX1/LSP1/IFI35/B2M/PSMB8/BAX/P3H4/VNN1/PTX3/STAT1/ISG15/PON3
REACTOME_NOD1_2_SIGNALING_PATHWAY	35	0.476922	1.4518	0.0483501	0.104045	0.0583036	1697	tags=23%, list=6%, signal=22%	BIRC3/IKBKG/CASP8/CASP4/TNFAIP3/CASP1/MAPK12/MAP3K7
DORN_ADENOVIRUS_INFECTION_32HR_DN	39	0.466686	1.45168	0.0471132	0.102173	0.0572549	1760	tags=26%, list=6%, signal=24%	KRT14/PLK2/TXNRD1/CCND1/SDCBP/CD83/NFKB2/IER3/NR4A1/EPHA2
PARENT_MTOR_SIGNALING_DN	38	0.468587	1.4516	0.0489043	0.104795	0.0587241	2668	tags=32%, list=9%, signal=29%	CNTN1/NRCAM/POLR3G/FGF2/VEGFA/CXCL3/FGF5/ELOVL5/KRT86/EIF5/ADAM19/FHL3
DOANE_BREAST_CANCER_ESR1_DN	45	0.454766	1.45147	0.0400854	0.0912837	0.0511528	1250	tags=18%, list=4%, signal=17%	S100A8/KRT16/CXCL8/SOD2/MSLN/PSAT1/UGT8/ASS1
DARWICHE_PAPILLOMA_RISK_LOW_UP	140	0.37491	1.45093	0.0099865	0.033395	0.0187136	4082	tags=33%, list=14%, signal=28%	S100A8/S100A9/FTL/IL1B/HEXA/GALK1/ID1/SAR1A/IFITM3/GCLM/LRIF1/PGK1/LIF/ENO1/TXN/FAM162A/PLEKHA4/LDHA/DYNLL1/CHKA/AC055839.2/TCP1/MGAT1/SUCLG2/ACAD9/SRM/ENG/QDPR/TGFA/PGAM1/CACYBP/HBS1L/EEF1D/TNFRSF25/SLPI/TRAF2/H2AFZ/SFPQ/SPAG5/VPS37A/EIF5AL1/SCN1B/YWHAB/PPIC/PDCD5/TUBA8
YU_MYC_TARGETS_UP	42	0.460163	1.44991	0.0446324	0.0984479	0.0551674	7181	tags=60%, list=25%, signal=45%	FAM136A/AURKA/KPNA2/TXN/CKS2/NUP54/IDI1/UBE2S/UCHL5/CDK1/TSPAN4/TOP2A/CKS1B/FDPS/PCLAF/CCNB1/BIRC5/GMNN/STRAP/HMGN2/YBX3/BRCA2/RRM1/HNRNPLL/PCNA
REACTOME_INFLUENZA_INFECTION	152	0.370469	1.44945	0.00741555	0.0272827	0.0152885	8970	tags=61%, list=31%, signal=42%	RPS27L/KPNA2/SEH1L/HSPA1A/ISG15/CLTA/NUP54/NUP62/HSP90AA1/POLR2G/NUP35/POLR2K/POLR2C/NUP43/RPS12/POLR2L/RAN/KPNA4/POLR2I/NUP93/RPL9/RPS27A/RPS10/POLR2D/RPS20/POLR2H/KPNA5/CALR/POLR2F/RPL24/RPL35A/RPLP1/RPL17/RPL8/RPS26/RPS3/POLR2B/RPL13A/FAU/POLR2E/UBA52/RPS3A/RPS19/NUP98/RPL26L1/CLTC/KPNA3/RPS28/RPS23/RPL38/NUP205/RPL41/RPS9/RPSA/RPS6/RPL31/RPS2/RPL27A/RPL5/RPS24/RPS17/RPL34/RPL36AL/RPS25/RPL11/…
REACTOME_PYRUVATE_METABOLISM_AND_CITRIC_ACID_TCA_CYCLE	54	0.437634	1.44832	0.0350456	0.0825555	0.0462617	5396	tags=43%, list=19%, signal=35%	ME1/SLC16A3/PDK1/LDHA/OGDH/IDH3B/SUCLG2/VDAC1/ACO2/PDHA1/DLST/GSTZ1/IDH3G/SUCLA2/SDHA/PDK3/SLC16A1/PDHB/SUCLG1/LDHB/SDHD/PDP2/BSG
BROWN_MYELOID_CELL_DEVELOPMENT_DN	114	0.384177	1.44644	0.0146023	0.0443864	0.0248729	2799	tags=29%, list=10%, signal=26%	SERPINA3/PAPSS2/PSAT1/NOP58/IFITM3/SSR3/SRSF7/PGRMC1/CCT6A/F2R/BIN1/PPAN/NOP56/RGS5/STC2/NSUN2/TIMM8A/GTPBP4/EIF4E/AQP9/TMEM97/WDR43/RCL1/FUT8/HSPH1/NOLC1/RUVBL2/NT5C3A/NARS/UTP4/SF3B3/NME1/ODC1
BURTON_ADIPOGENESIS_PEAK_AT_24HR	42	0.45901	1.44628	0.0460418	0.100591	0.0563683	4391	tags=31%, list=15%, signal=26%	S100A8/GALK1/CDC20/KPNA2/PRC1/H2AFX/AGT/SLPI/CDK1/TOP2A/CCNB1/EXOSC5/UBE2C
CHAUHAN_RESPONSE_TO_METHOXYESTRADIOL_UP	49	0.445853	1.44601	0.0367805	0.0855716	0.0479519	4117	tags=43%, list=14%, signal=37%	CBX6/DNAJA1/HSPA8/TIMM44/AARS/CKS2/CHMP7/SRM/AHSA1/UBE2S/HSP90AA1/NME1/ATF4/RBM3/GARS/CARS/UBE2M/SRSF2/EIF5AL1/TARDBP/CCNB1
VARELA_ZMPSTE24_TARGETS_UP	41	0.460076	1.44469	0.0470862	0.102173	0.0572549	4412	tags=49%, list=15%, signal=41%	CDKN1A/GADD45A/ATF3/TSR1/CRCP/BCL2L1/NCDN/NR1D1/HIST1H1C/ZFP36L2/DDIT4/CYP26A1/CSNK1D/CD14/ATF4/RGS16/C15orf39/GADD45B/SLC20A1/BTG3
BROCKE_APOPTOSIS_REVERSED_BY_IL6	144	0.372244	1.44443	0.0105777	0.034655	0.0194197	4157	tags=42%, list=15%, signal=36%	MUC1/SH2D2A/GADD45A/MAP1B/DUSP3/ICAM1/FLOT1/LTBP1/ID1/LDLR/PNO1/SOCS3/NCBP2/DNAJB9/TXNDC9/IER2/PLEKHB2/PIM2/EIF4E/GRB2/NMI/HSPA13/SOCS1/STAT1/DYRK3/JUN/ZFP36L2/EVI2B/IRF9/HSPA1A/DUSP5/GAS6/DOHH/MT1X/EIF5/PTP4A1/RHOBTB3/NAMPT/DNAJA2/MSMO1/MARCKS/PTP4A3/BCL3/STK17B/HBEGF/LPCAT4/POLR3F/SLC16A6/PTPRG/RGS16/STAT3/GADD45B/EPB41L2/CEBPB/LRMP/ZFP36/RAD1/IL6ST/CXCR4/SLA/BORCS8-MEF2B
NAKAMURA_METASTASIS	42	0.458152	1.44358	0.0469814	0.102169	0.0572524	4092	tags=43%, list=14%, signal=37%	LAPTM5/HCLS1/DUSP3/SLC16A3/TOR4A/PGK1/FOSL1/CMTM3/MEPCE/DDX24/ETV1/FKBP10/SF3B3/PDE10A/TUBB2A/PDK3/STX4/TUBB6
ZHAN_MULTIPLE_MYELOMA_UP	63	0.422295	1.44245	0.0316148	0.0772736	0.0433019	4701	tags=37%, list=17%, signal=31%	CDKN1A/QSOX1/MVP/CTSO/EXTL2/ATF3/FARSA/CASP1/PUM3/HIST1H1C/ECH1/EIF3B/HIST2H2BE/PHB/MLLT3/LAMC1/ARID5A/CARS/MRPL58/ALG3/DNASE1L1/CD47/SNHG14
ODONNELL_TARGETS_OF_MYC_AND_TFRC_DN	44	0.45334	1.43939	0.0441281	0.0977077	0.0547526	5142	tags=39%, list=18%, signal=32%	TFRC/AURKA/CDC20/HELLS/HSPH1/FUS/KBTBD8/G3BP1/CDK1/TOP2A/CKS1B/RAD1/CCNB1/BIRC5/RANBP1/DBF4/SPC25
BROWNE_HCMV_INFECTION_6HR_UP	49	0.443787	1.43931	0.0384524	0.0884029	0.0495384	3686	tags=35%, list=13%, signal=30%	TNFSF9/MSLN/IFI6/PNP/JMJD6/AMD1/OMD/OASL/ISG15/SLC6A6/CREM/RIPK1/HBEGF/VIL1/CDR2L/GNS/SFPQ
DUNNE_TARGETS_OF_AML1_MTG8_FUSION_UP	45	0.450759	1.43868	0.0434061	0.0966685	0.0541703	2465	tags=29%, list=9%, signal=26%	SRGN/S100A8/LAPTM5/ALOX5AP/SAMSN1/ALDH3B1/CMTM3/SELPLG/LIN7A/LCP1/PSTPIP1/PTGER4/HSPA6
KESHELAVA_MULTIPLE_DRUG_RESISTANCE	79	0.404963	1.43853	0.0242792	0.064093	0.0359159	6828	tags=52%, list=24%, signal=40%	FN1/ENC1/CASP4/TMEM104/TAF12/CDKN2C/RINT1/GUK1/SIL1/MAPK12/PDLIM5/ODF2/BABAM2/HDAC1/ZNF668/HHAT/TSPAN31/STYXL1/MAGOHB/IZUMO4/PHF1/ADAM15/BLVRB/HFE/ICAM3/C1orf35/MAN1B1/ANXA2P2/CCS/CDK11B/MED8/PTHLH/PPIEL/USE1/BCL7B/LAMTOR2/PPP4C/SBNO2/DXO/GSTK1/VPS33B
HAMAI_APOPTOSIS_VIA_TRAIL_DN	176	0.360806	1.43849	0.00788288	0.0285126	0.0159776	3245	tags=29%, list=11%, signal=26%	CDH2/KYNU/TRIM16/ALDOC/SLCO4A1/GDF15/ICAM1/SERPINH1/SEZ6L2/IFITM2/HIF1A/GRWD1/COA7/NOL6/FHOD1/SCLY/BATF3/PHLDA2/CCDC85B/ANGPTL4/CYBA/NLE1/NR1H3/TMEM45A/DDAH2/PLAUR/PYCR1/KCNG1/MEPCE/INF2/FSTL3/JUN/SRD5A3/FXYD5/TYMP/ISG15/CFD/UBIAD1/ASPHD1/SPHK1/AC074143.1/SLC39A4/BCAS3/BCL3/SLC27A5/SERPINB1/BRSK1/SLC5A6/PNPLA6/OSCAR/NMB
ZHANG_RESPONSE_TO_IKK_INHIBITOR_AND_TNF_UP	220	0.350667	1.43701	0.00495338	0.0201026	0.0112649	3755	tags=34%, list=13%, signal=30%	KYNU/CDKN1A/SQSTM1/IL7R/CXCL8/TNFRSF10D/BIRC3/IFIT3/CCN3/IL1A/IL32/SGPP2/IL1B/ZC3H12A/SLC2A6/TNFAIP6/IFIT1/ICAM1/TNIP1/CXCL1/TM4SF1/ATF3/CD83/CXCL2/CCL20/PLAU/CXCL3/TNFAIP3/SOCS3/DAPP1/GBP3/LIF/NFKB2/IL1R2/IGFL1/RELB/PLAUR/TNFRSF10B/PTX3/INF2/ZNFX1/TNFRSF9/HERPUD1/BAZ1A/OASL/GCLC/IRF9/RAB24/PAG1/STYK1/BTN2A1/DDIT4/SEMA7A/NAV3/GLS/BCL3/NCK1/HBEGF/SERPINB1/DOCK4/HELZ2/TNIP2/IRAK2/IFNGR2/CLN5/LACC1/…
WANG_RESPONSE_TO_GSK3_INHIBITOR_SB216763_DN	356	0.334313	1.437	0.000993707	0.00619296	0.00347036	4165	tags=34%, list=15%, signal=29%	ITGA5/GGT5/FAM136A/SLCO4A1/TFRC/PSAT1/DNAJA1/NIP7/DBN1/INSIG1/BYSL/TOE1/EZR/FABP5/ALDH1B1/LDLR/SEL1L3/XBP1/NOL6/ZWINT/FOS/ELOA/UMPS/MCM8/PNO1/TNFAIP3/UTP15/TSR1/NOP16/TENT5C/TWNK/PIM2/SLC39A14/SHCBP1/PDK1/ECE1/PHLDA1/TYMS/PSMC3IP/EEF1AKMT1/SEH1L/LYAR/DLX1/CLSPN/IPO11/EXOSC4/HERPUD1/DKC1/PRPS1/LRP8/NUDT5/HELLS/PBK/HSPA1A/WDR4/SERPINB8/FEN1/IGFBP4/MRTO4/SLC6A6/POLR3H/CTPS1/ATAD3B/HSPH1/GEMIN4/RRP12…
KIM_WT1_TARGETS_8HR_DN	118	0.379785	1.43684	0.0173547	0.0500995	0.0280743	4988	tags=34%, list=18%, signal=28%	KYNU/LOX/CDKN1C/ASPH/SOD2/PLK2/PIMREG/ID1/RAB29/CASP1/STK17A/PSPH/NNMT/SRRT/ANP32A/EHMT2/AP1S1/GGCX/GATD3A/RHOBTB3/TMEM14B/RHOT2/CCN2/PPFIA3/DLST/FJX1/SPOCK2/REXO2/OGFR/IGF2BP3/RGS17/TBCB/KLRG1/AMIGO2/TSR3/LRRC19/TGFB2/MANF/NDUFS6/SIVA1
JAZAG_TGFB1_SIGNALING_UP	94	0.392511	1.43649	0.0226337	0.060914	0.0341345	4349	tags=29%, list=15%, signal=24%	PDZK1IP1/ALDOC/GSR/CDRT1/ATF5/CHORDC1/CCNH/CCDC85B/GTF2H2/HLA-A/FEZ2/EHMT2/N6AMT1/NEU3/HSF2BP/DAP3/IL12A/YAF2/GFER/PWP1/SUPT16H/TIMM8B/RGS17/PTPN22/FARS2/CNPY3/BUD31
MULLIGHAN_MLL_SIGNATURE_2_DN	256	0.344949	1.43589	0.00152022	0.00858279	0.00480955	3815	tags=29%, list=13%, signal=25%	SERPINE2/NPR3/TRIM16/IFI44/LGALS3BP/GGT5/CXCL8/PMAIP1/AREG/DNTTIP2/FGFR1/EDN2/PML/DBN1/MYRF/STAT4/RPS6KA2/HIF1A/ICOSLG/TM4SF1/CXCL2/PGF/MAN1A1/TEX10/LYRM1/IER2/DNAJC12/DLEU1/CEP170/PYCR1/PRKCQ/ISOC1/TRMT1/ASS1/PTGIR/CDH16/TGFBR2/TSPAN7/HYAL2/FAH/IFITM1/RPP40/ABHD10/TFPI/ADRM1/B4GALT6/CERS4/CLIC4/GLS/PTP4A3/BTN3A3/TNFRSF21/AGRN/LINC01963/SMYD2/EEF1D/CDH4/MRPS22/TNFRSF25/MATR3/BCR/DCUN1D4/SLC9A3R2/…
DACOSTA_ERCC3_ALLELE_XPCS_VS_TTD_DN	32	0.481512	1.43556	0.0559105	0.116706	0.0653986	1489	tags=28%, list=5%, signal=27%	HMOX1/HAS2/PDGFRL/VLDLR/FABP5/SYNM/DLC1/ANOS1/SERPINB2
REACTOME_RHO_GTPASES_ACTIVATE_PKNS	83	0.400464	1.43531	0.0255567	0.0663958	0.0372063	5175	tags=29%, list=18%, signal=24%	HIST1H2AC/HIST1H2BK/AR/HIST2H2AA4/HIST1H3G/HIST1H2BG/HIST1H2BD/HIST2H4A/YWHAG/HIST1H2BN/PKN1/HIST2H2BE/HIST1H3H/MYL9/RHOC/H2AFX/HIST1H2BJ/MYL6/H2AFZ/YWHAB/HIST1H2BC/SFN/RAC1/HIST1H4A
STANELLE_E2F1_TARGETS	28	0.495217	1.43523	0.0649028	0.130402	0.0730736	3541	tags=36%, list=12%, signal=31%	TNFSF9/ENO2/CCND1/FGF2/AURKA/MMP16/BAK1/MAP3K14/BID/RFC3
REACTOME_TRANSFERRIN_ENDOCYTOSIS_AND_RECYCLING	30	0.486338	1.43465	0.0611829	0.124564	0.0698021	4342	tags=33%, list=15%, signal=28%	TFRC/ATP6V0A4/ATP6V1E1/ATP6V0B/ATP6V1D/ATP6V0E1/ATP6V1A/HFE/TCIRG1/ATP6V0C
LASTOWSKA_NEUROBLASTOMA_COPY_NUMBER_UP	178	0.359333	1.4346	0.00733634	0.0271126	0.0151931	4881	tags=35%, list=17%, signal=29%	ALDOC/SNHG16/FTSJ3/ABCC3/PHF23/SCO1/GOSR2/TIMM22/JMJD6/PSMC5/NAT9/UTP18/PTRH2/POLG2/NOL11/MRPS23/CRK/KPNA2/SMG8/P4HB/PYCR1/ATP5PD/TMEM199/TMEM97/CCDC47/RNASEH1/ARMC7/ARL16/TMEM106A/SLC25A19/UTP6/ATP5MC1/TACO1/PHB/NME1/NDUFAF8/NTN1/GPS2/ALYREF/TOP2A/SRSF2/STAT3/LUC7L3/EIF4A3/ASGR1/MRPL12/PRR11/MRPL58/GPATCH11/SLC25A10/JPT1/BIRC5/MRPS7/FLOT2/MED9/MRPL27/PMP22/RAB10/FLII/STX8/ACADVL/CCDC144NL-AS1
MARTINEZ_RESPONSE_TO_TRABECTEDIN_DN	270	0.343037	1.43448	0.00122662	0.0073453	0.0041161	4485	tags=31%, list=16%, signal=27%	HS3ST3B1/MAT2A/GLRX/TXNRD1/TCERG1/BAG2/HSPA8/EEF1AKNMT/AURKA/NOC3L/XBP1/DDX21/NUFIP1/ZMYND8/CCNH/TDG/EIF3A/PSME3/ARHGEF2/GTF2H2/FOSL1/CRK/BCL2L1/TOP1/NMI/STK17A/BLZF1/PTGES3/SON/BUB3/DKC1/SERBP1/TIMM21/TRIP4/SRSF3/MAP3K7/HSPH1/CCT4/RAP1B/SLC4A1AP/ARPC5L/RPP14/RABGGTB/MAP7D3/FADD/SLC25A17/MRPL1/RIPK1/SEC16A/ADSL/PSMA5/RBM25/PAFAH2/VEGFC/RBM14/DNAJA2/DLG5/CCN2/MID1IP1/STK17B/MRPS35/DNAAF2/SACS/TSFM…
GENTLES_LEUKEMIC_STEM_CELL_UP	26	0.503063	1.43329	0.0691121	0.136705	0.0766057	1857	tags=19%, list=7%, signal=18%	ABCC2/BIRC3/ICAM1/VNN1/PCDHGA10
CHOI_ATL_STAGE_PREDICTOR	43	0.451768	1.43253	0.0500588	0.10674	0.0598139	5351	tags=40%, list=19%, signal=32%	FTL/RAB5IF/HSPA4/SEC23B/EIF5/SRPRB/CCT3/IL17RA/TOMM70/COMMD3/TARDBP/ST13/SEC11A/ATP5F1A/TSPO/NAP1L1/CCDC90B
MARTENS_BOUND_BY_PML_RARA_FUSION	418	0.328658	1.43212	0.000690131	0.00474294	0.00265781	3111	tags=23%, list=11%, signal=21%	HMOX1/SQSTM1/LAPTM5/KCNAB2/ALOX5AP/MAFB/GBE1/KLHDC4/TIMP2/FAM216A/C20orf197/ZC3H12A/HPCAL1/PGD/PTPRJ/ICAM1/TBXAS1/RPS6KA2/ID1/IFITM3/CUEDC1/TOX2/PSAP/KRI1/ST3GAL2/FMNL1/ADGRE2/RASA3/HECW1/TNFAIP3/FHOD1/ITPR1/LRRC20/NUDT9/SDE2/TMEM173/TPD52L2/GALNT6/TMEM104/ARHGEF2/FGFR1OP2/PUM3/TNFRSF10B/SPG7/ECE1/PLCB2/RAB31/MGLL/TOMM20/DNAJB12/FOSB/PKM/ANP32E/CCND3/EXOSC4/PREX1/PPCDC/DCTN1/TRIP4/STRADA/TUBA1C/F…
UDAYAKUMAR_MED1_TARGETS_UP	133	0.37161	1.43197	0.0124306	0.0392368	0.0219872	5190	tags=34%, list=18%, signal=28%	SRGN/ASPH/PSAT1/ME1/POLR3G/AURKA/MRPL42/SLC16A3/CBS/RDH11/EIF3A/SLC19A1/MAD1L1/PUM3/ANP32E/AIMP2/PSPH/LONP1/LRP8/SEPT6/OGG1/BRD9/FKBP14/GATD3A/SUB1/BPGM/FAAP100/FAM173A/PHB/GARS/TSFM/TSPAN4/SDF2L1/EMC8/MRPL12/TLE6/PCLAF/SLC16A1/CD47/DTYMK/BOP1/PTER/SLC35A2/CCNJ/EDF1
HUNSBERGER_EXERCISE_REGULATED_GENES	27	0.496534	1.43164	0.06946	0.137216	0.0768919	4102	tags=33%, list=14%, signal=29%	MFGE8/CSF3/MAGED1/GRB2/LDHA/EGR4/ODC1/GAD1/VGF
REACTOME_DEGRADATION_OF_BETA_CATENIN_BY_THE_DESTRUCTION_COMPLEX	81	0.400894	1.43125	0.0250443	0.0655564	0.036736	5167	tags=48%, list=18%, signal=40%	PSMB8/PSMC5/PSME3/PSMB10/PSMA6/TLE2/PSMC4/PSMB9/PPP2CB/HDAC1/PSMD10/PSME2/PSMA5/PSMD7/PSMD13/PSMB5/PSMD11/PSME1/PSMA2/PSMA1/PSMC3/RPS27A/PSMD2/SKP1/TLE1/PPP2CA/UBC/PSMD4/RBX1/PSMC2/PSMB6/CTBP1/PSMA7/PSMD12/PSMD14/PSMB4/UBA52/PSMB3/PSMA3
HU_GENOTOXIN_ACTION_DIRECT_VS_INDIRECT_4HR	36	0.4665	1.43009	0.0551993	0.115613	0.0647861	4865	tags=33%, list=17%, signal=28%	ZEB1/DMBT1/NRP1/TMEM230/IFT46/PPIE/SMC4/PITPNB/ACTB/UBC/NR1H2/MCL1
HU_GENOTOXIC_DAMAGE_4HR	35	0.469626	1.42959	0.055912	0.116706	0.0653986	2817	tags=31%, list=10%, signal=28%	TIMP2/MAPRE1/AURKA/MTHFD2/CDC20/ALAS1/KPNA2/NCDN/CKS2/PRC1/H2AFX
RUIZ_TNC_TARGETS_DN	143	0.368279	1.42871	0.0127096	0.0399705	0.0223983	4401	tags=38%, list=15%, signal=33%	SERPINE2/IL7R/CXCL8/NXN/CCDC86/POLR1E/PNP/ZWINT/PLAU/EIF2S1/STC2/SHCBP1/FOSL1/TYMS/DKC1/PRPS1/SERPINB2/TMEM97/CKS2/PBK/FEN1/POLR3K/CALM2/MRTO4/PEA15/CTPS1/GINS3/MT1X/EIF5/PFKP/DIO2/DDAH1/NAV3/KIF2C/TIPIN/EFEMP1/ODC1/H2AFX/RRP7A/PDSS1/TNFRSF12A/DSCC1/POP7/GINS1/CDK1/TUBB4B/SPDL1/EXOSC8/AKAP2/MEST/UGCG/TUBB6/AMIGO2/UBE2C/BIRC5
CEBALLOS_TARGETS_OF_TP53_AND_MYC_DN	34	0.471952	1.4281	0.0557084	0.116519	0.0652941	2089	tags=24%, list=7%, signal=22%	IGFBP3/MDM2/VARS/F2R/PLAUR/SEPT4/KRT8/SNCA
PILON_KLF1_TARGETS_UP	448	0.325289	1.42661	0.000712251	0.00485409	0.00272009	2935	tags=21%, list=10%, signal=19%	DCN/CFB/HMOX1/CDH2/C1S/SLC39A8/ALDOC/LHFPL6/ASPH/CFI/FERMT2/PON2/GPC6/PPBP/SRXN1/HS3ST3B1/BNIP3/IL1B/AKR1B10/ADAM12/ME1/AFP/FN1/SERPINH1/MDM2/TBXAS1/CD59/ABCC3/ASB1/SNTB1/TSPAN9/RNF128/DNAJB4/DLC1/FSTL1/GNG11/SDC2/MTHFD2/ACSL4/GCLM/GNL3L/TENT5C/VKORC1/COL4A1/NR1H3/LOXL2/MAGED1/GTF2H2/RBMS1/GAS2L1/CIAPIN1/FBN2/RARS/BGN/CHAC2/TSPAN7/HARS/HARS2/MZT1/SEPT4/KRT8/WDR43/VOPP1/TRIP4/TMEM30A/C1GALT1/PODXL…
CROMER_TUMORIGENESIS_UP	54	0.430698	1.42537	0.0417667	0.0940442	0.0526997	2799	tags=35%, list=10%, signal=32%	KRT16/CXCL8/CHST2/COL4A2/IL1B/IFI6/FN1/FAP/TNC/CXCL1/PLAU/TNFAIP3/PLOD3/SMOX/OASL/APOBEC3B/MMP3/PXDN/ODC1
STAMBOLSKY_TARGETS_OF_MUTATED_TP53_DN	50	0.437841	1.42446	0.0430725	0.0963043	0.0539662	3830	tags=42%, list=13%, signal=36%	IFI6/IFIT1/TAGLN/CUEDC1/IFI35/SP100/TMEM44/SP110/HLA-B/TRAPPC12/STAT1/IRF9/ISG15/IFITM1/DTX3L/BST2/RAB4B/DDX60/CUL9/RBCK1/RIPOR3
ZHU_CMV_24_HR_DN	80	0.400179	1.42403	0.0266227	0.068172	0.0382016	2762	tags=26%, list=10%, signal=24%	IGFBP3/AKR1C1/LOX/C1R/FTL/ANPEP/CHN1/TAGLN/ACTA2/CCND1/ACO1/PYCR1/TNFRSF1A/CFD/RAB13/FKBP10/TPM2/FLNA/EFEMP1/TGFBR3/UBL4A
REACTOME_TRIF_TICAM1_MEDIATED_TLR4_SIGNALING	95	0.388303	1.42389	0.0240779	0.063846	0.0357775	4166	tags=28%, list=15%, signal=24%	SAA1/BIRC3/DUSP3/IKBKG/RPS6KA2/CASP8/FOS/DUSP4/NKIRAS1/NFKB2/TICAM2/JUN/MAP3K7/TICAM1/PPP2CB/TLR4/FADD/RIPK1/IKBKE/CD14/IRF3/TNIP2/IRAK2/RPS27A/SKP1/PPP2CA/UBC
THEILGAARD_NEUTROPHIL_AT_SKIN_WOUND_UP	74	0.403204	1.42192	0.0321942	0.0781238	0.0437784	2416	tags=23%, list=8%, signal=21%	CXCL8/IL1R1/IL1B/CXCL2/VEGFA/PLAU/CXCL3/MTHFD2/CALU/AQP9/IER3/KLF10/SH2B2/IDI1/EIF5/EIF4A1/NAMPT
GENTILE_UV_RESPONSE_CLUSTER_D5	35	0.466919	1.42135	0.0579743	0.119668	0.0670586	3456	tags=43%, list=12%, signal=38%	FERMT2/PNO1/MLX/FGF5/JMJD6/ZFP36L2/UBTF/SRSF3/FADD/VEGFC/NAV3/WBP1L/HOXB2/PITPNB/DDIT3
PID_SYNDECAN_4_PATHWAY	29	0.48578	1.42115	0.0695199	0.137246	0.0769086	2200	tags=34%, list=8%, signal=32%	ITGA5/FGFR1/ADAM12/FN1/TNC/SDCBP/FGF2/NUDT16L1/ITGB1/TFPI
DARWICHE_SQUAMOUS_CELL_CARCINOMA_UP	128	0.372065	1.4211	0.0144077	0.0439119	0.024607	4011	tags=31%, list=14%, signal=27%	S100A8/S100A9/FTL/IL1B/HEXA/ICAM1/GALK1/ID1/IFITM3/BEST1/GCLM/PGK1/LIF/TRMT1/ENO1/TXN/FAM162A/PLEKHA4/LDHA/DYNLL1/CHKA/TCP1/CCT4/SUCLG2/SRM/CDC42EP2/ENG/QDPR/TGFA/PGAM1/CACYBP/HBS1L/EEF1D/SLPI/BID/H2AFZ/SFPQ/YWHAB/PPIC/PDCD5
TAKAO_RESPONSE_TO_UVB_RADIATION_DN	98	0.385285	1.41888	0.0242967	0.064093	0.0359159	5875	tags=44%, list=21%, signal=35%	HIST1H2AC/CES1/FOXO1/RRS1/ELOA/TNFAIP3/NFKB2/SLC39A14/PUM3/TOMM20/AARS/TNFRSF1A/OGDH/PRMT5/SRSF3/SERPINB8/CREB3/NOLC1/RGS2/ATIC/RER1/CCT8/MARCKS/ECHS1/PHB2/WTAP/ARPC1B/PWP1/ZFP36/IFI16/NOP14/UGCG/CAMK2D/HNRNPM/MCL1/CBFB/GTF2H1/PSMA3/ADM/RPS23/SETDB1/RNF4/TP53BP1
ZWANG_EGF_INTERVAL_UP	81	0.397398	1.41877	0.027827	0.0706057	0.0395654	3903	tags=28%, list=14%, signal=25%	SLC39A8/SLC7A11/C20orf197/DSEL/KCNQ3/INSIG1/GPAT3/UAP1/TMEM156/ACSL4/DNAJB9/CAPN6/MSANTD2/CA8/LBHD1/OSMR/B4GALT6/EEF1D/PTCH2/CLEC18C/EXD3/SDK1/SLFN5
LUI_THYROID_CANCER_CLUSTER_2	43	0.447372	1.41859	0.0580494	0.119697	0.067075	2955	tags=30%, list=10%, signal=27%	ABCC3/ID1/BNIP3L/SLC16A3/PATZ1/RDH11/ZCCHC24/ITPR1/SORD/BASP1/TPM2/TOB2/PPARG
KLEIN_PRIMARY_EFFUSION_LYMPHOMA_UP	47	0.441498	1.41843	0.0485946	0.10435	0.058475	2654	tags=30%, list=9%, signal=27%	CFI/P4HA1/MUC1/PLOD1/PAM/VEGFA/LDLR/VARS/DHX30/SELPLG/CASP7/EIF4A1/IQGAP2/PTP4A3
NIKOLSKY_BREAST_CANCER_20Q11_AMPLICON	31	0.478454	1.41811	0.0640675	0.129148	0.0723708	5558	tags=45%, list=20%, signal=36%	SPAG4/UQCC1/EDEM2/PROCR/NFS1/GSS/PIGU/PHF20/EIF6/ROMO1/GDF5/ERGIC3/MMP24/AAR2
HOFFMANN_LARGE_TO_SMALL_PRE_BII_LYMPHOCYTE_UP	150	0.362787	1.41764	0.0131183	0.0409613	0.0229536	4830	tags=31%, list=17%, signal=26%	CDKN1A/AURKA/MTHFD2/JADE1/CDC20/CDKN2C/KPNA2/HOXC5/ENO1/ANP32E/AARS/LDHA/CKS2/NUDC/HELLS/ANP32A/FEN1/UBE2S/PRC1/KIF2C/SMC4/H2AFX/COIL/PSMC3/WDHD1/CDK1/TUBB4B/SPDL1/HES1/RFC3/TOP2A/CKS1B/TRIM46/KIN/TUBB/UBE2T/PPP2CA/NASP/CBX5/PCLAF/CIP2A/CCNB1/ANP32B/UBE2C/HMGB3/NDC80/FLII
REACTOME_CLATHRIN_MEDIATED_ENDOCYTOSIS	140	0.366299	1.4176	0.0151147	0.0455675	0.0255347	5083	tags=34%, list=18%, signal=28%	COPS8/IL7R/AREG/WNT5A/TFRC/EPGN/HSPA8/TGOLN2/LDLR/AP2M1/BIN1/AMPH/EGF/BTC/VAMP3/GRB2/CLTCL1/TOR1B/NECAP1/AP2A1/CLTA/EPS15L1/COPS7A/TGFA/CTTN/TRIP10/HBEGF/AP2S1/AAK1/TACR1/COPS6/RAB5C/NEDD8/RPS27A/ACTB/ARFGAP1/UBC/ARPC1A/ARRB2/SYT11/M6PR/COPS5/SH3GL1/NECAP2/ARPC5/DAB2/UBA52
ZHONG_SECRETOME_OF_LUNG_CANCER_AND_FIBROBLAST	119	0.374439	1.41736	0.01789	0.0510191	0.0285896	2942	tags=26%, list=10%, signal=23%	CFB/LGALS3BP/AKR1B1/TIMP2/MSLN/GSR/IMPA1/QSOX1/ME1/FN1/ACTA2/PNP/ATP6AP2/PGK1/LAP3/P4HB/PRDX1/ENO1/CTSB/PKM/BGN/LDHA/VCP/PSMA5/PSMB5/TPI1/GSTO1/PRDX6/MSN/AGRN/HSP90AB1
REACTOME_TP53_REGULATES_TRANSCRIPTION_OF_DNA_REPAIR_GENES	61	0.418457	1.41701	0.0397755	0.0908306	0.0508989	5695	tags=39%, list=20%, signal=32%	FOS/ELOA/CCNH/GTF2H2/ERCC2/SUPT5H/JUN/ELOC/POLR2G/POLR2K/POLR2C/POLR2L/SUPT16H/POLR2I/POLR2D/POLR2H/POLR2F/GTF2H5/POLR2B/GTF2H1/POLR2E/ELOB/NELFE/MLH1
REACTOME_ERCC6_CSB_AND_EHMT2_G9A_POSITIVELY_REGULATE_RRNA_EXPRESSION	67	0.410914	1.41651	0.0388133	0.0890989	0.0499285	3536	tags=25%, list=12%, signal=22%	HIST1H2AC/HIST1H2BK/HIST2H2AA4/HIST1H3G/HIST1H2BG/HIST1H2BD/HIST2H4A/EHMT2/HDAC1/HIST1H2BN/HIST2H2BE/HIST1H3H/H2AFX/TTF1/CHD3/HIST1H2BJ/H2AFZ
MULLIGHAN_MLL_SIGNATURE_1_DN	213	0.346579	1.4157	0.00810654	0.0290809	0.0162961	3765	tags=28%, list=13%, signal=24%	SERPINE2/NPR3/TRIM16/IFI44/SYDE1/GGT5/CXCL8/PMAIP1/AREG/EDN2/IFIT1/MYRF/STAT4/TM4SF1/CXCL2/PGF/DLC1/BIN1/ZMYND8/ZNF274/DNAJC12/DLEU1/CEP170/PYCR1/PRKCQ/ISOC1/TRMT1/PTGIR/CDH16/TSPAN7/HYAL2/FAH/IFITM1/RPP40/ABHD10/TFPI/ADRM1/C1orf174/AP5S1/PTP4A3/SRP72/BTN3A3/HSF4/TNFRSF21/AGRN/SMYD2/EEF1D/BCKDHB/MRPS22/HOXB2/BCR/DCUN1D4/SLC9A3R2/PITPNB/EGFL7/SPRY1/MAPRE2/USP34/MRPS2
WHITFIELD_CELL_CYCLE_G2_M	195	0.350448	1.41536	0.00732188	0.0270918	0.0151815	4792	tags=31%, list=17%, signal=26%	ADGRE5/SMTN/TXNRD1/GADD45A/DNAJA1/CCND1/TSKU/PIMREG/HSPA8/AURKA/CCDC88A/GTSE1/RRP1/DUSP4/ITPR1/SGO2/CDC20/TXNDC9/KIF5B/TOMM34/SHCBP1/KCTD2/HSPA13/ANP32E/ZC3HC1/MZT1/LRP8/CKS2/SRSF3/PBK/ODF2/GAS6/ARHGDIB/ARL6IP1/TPX2/PTP4A1/KIF2C/RBM8A/E2F5/NUP35/AKIRIN2/PSMG3/TUBB4B/SPDL1/TSN/CKS1B/KIF20B/ADM5/SFPQ/SPAG5/PRR11/SMARCB1/CCNB1/GLI1/ANP32B/JPT1/BIRC5/HMGB3/BMP2/SAPCD2/RCBTB2
CADWELL_ATG16L1_TARGETS_UP	79	0.398105	1.41417	0.030349	0.0751967	0.0421381	2111	tags=20%, list=7%, signal=19%	NPR3/CCDC80/CFI/AKR1B10/DGAT2/SOCS3/RHOV/SSR1/VNN1/CHAC1/KCTD14/CHST1/C1QTNF1/ISG15/CFD/ARSK
NABA_CORE_MATRISOME	241	0.342407	1.41406	0.00486766	0.0198336	0.0111142	1611	tags=17%, list=6%, signal=16%	IGFBP3/DCN/COL8A1/SRGN/LRG1/FBN1/MFGE8/CCN3/TGFBI/DMBT1/COL4A2/PCOLCE2/COL27A1/MFAP5/TNFAIP6/FN1/SVEP1/TNC/FBLN5/COL12A1/LTBP1/TSKU/ESM1/SRPX/LAMB1/NPNT/ANOS1/COL4A1/RSPO2/FGL1/OMD/CCN5/NDNF/MATN1/ABI3BP/FBN2/BGN/SSPO/NTNG1/INTS6L
LI_AMPLIFIED_IN_LUNG_CANCER	176	0.354401	1.41296	0.00957207	0.032601	0.0182687	5032	tags=42%, list=18%, signal=35%	IGFBP3/AKR1C1/LGALS3BP/UGDH/MSLN/NQO1/PGD/AKR1B10/MUC1/TXNRD1/GALNS/ABCC3/DAP/VEGFA/ENC1/XBP1/PLAU/SLC22A18/PHLDA2/MAGED1/TOP1/P4HB/PRDX1/ENO1/PKM/CKAP4/LTF/BGN/STAT1/HSPD1/CYCS/CCT5/LDHA/ALDOA/ARL6IP1/TALDO1/HAX1/ELOC/CCT3/PFKP/NME1/CSTB/ODC1/TUFM/CD46/EEF1D/KRT7/KRT6C/SSR4/SNRPE/NME4/HSPE1/RAN/KPNA4/SDHA/RAB1A/RPS10/RPS20/POSTN/ATP1B1/LAPTM4B/CALR/HSPA5/UBE2C/RPL17/RPL8/LDHB/CBX3/SFN/DPP7/MCL1/…
DAZARD_UV_RESPONSE_CLUSTER_G2	30	0.478864	1.41261	0.0704736	0.13886	0.0778131	2778	tags=47%, list=10%, signal=42%	CXCL8/PMAIP1/BAMBI/GADD45A/ATF3/CXCL2/CCL20/CXCL3/PHLDA2/TOB1/IER3/UBE2S/CCN2/ATF4
REACTOME_HEPARAN_SULFATE_HEPARIN_HS_GAG_METABOLISM	50	0.434144	1.41243	0.0478583	0.103204	0.0578326	2878	tags=32%, list=10%, signal=29%	DCN/SDC3/GPC6/HS3ST3B1/CSPG5/SDC2/GPC1/HS3ST3A1/B3GAT3/BGN/B4GALT7/HS6ST2/HS3ST2/XYLT2/BCAN/AGRN
SMIRNOV_RESPONSE_TO_IR_6HR_UP	165	0.357752	1.41229	0.0117581	0.0375965	0.021068	3467	tags=31%, list=12%, signal=27%	CDKN1A/TNFSF9/TIGAR/PMAIP1/PLK2/AEN/GDF15/GADD45A/MDM2/ACTA2/FGF2/PDE4B/ASTN2/MT1F/ATF3/PGF/TP53I3/DNAJB4/F2R/MAD1L1/FOSL1/APTX/TNFRSF10B/C12orf45/PROCR/TRIAP1/CLP1/SOCS1/TOB1/NABP1/CSF1/SEC61A1/IER3/PODXL/ZMAT3/TNFSF4/APOBEC3B/MAP4K4/MR1/MT1X/FAS/MOSPD1/DLG5/FDXR/APOBEC3C/AAK1/PRKAB1/CHMP3/DDIT3/SLC30A1/RGS16
KEGG_PYRUVATE_METABOLISM	39	0.454012	1.41226	0.0628176	0.127131	0.0712405	5112	tags=38%, list=18%, signal=32%	AKR1B1/ME1/ALDH1B1/ALDH9A1/PKM/LDHA/ACYP2/GRHPR/PDHA1/ACAT2/PDHB/MDH1/PKLR/LDHB/HAGHL
HOWLIN_PUBERTAL_MAMMARY_GLAND	49	0.434958	1.41068	0.0480057	0.103449	0.0579699	3459	tags=35%, list=12%, signal=31%	NPR3/S100A9/AOX1/AREG/HSD11B1/NFIL3/LSP1/TWIST1/IL1R2/CTSB/RECK/SLC6A6/IDI1/KRT10/SMS/TDRP/SLC30A1
ACOSTA_PROLIFERATION_INDEPENDENT_MYC_TARGETS_DN	108	0.377223	1.4101	0.0216998	0.059076	0.0331045	2804	tags=28%, list=10%, signal=25%	KYNU/RIT1/AKR1C1/UGP2/AKR1C2/ADGRE5/SAMSN1/SERPINH1/ID1/ST3GAL2/SELENBP1/TOR4A/CHPF2/FADS1/ARHGEF2/TWNK/ADAMTSL4/BCL2L1/NEU1/KRT8/RAB13/SLCO2B1/HMBS/CREM/MINPP1/LYPLA2/ARL4A/FDXR/KRT10/RHOC
HESS_TARGETS_OF_HOXA9_AND_MEIS1_UP	66	0.409319	1.409	0.0413081	0.0933551	0.0523135	3757	tags=32%, list=13%, signal=28%	AFP/NOP58/RRS1/FABP5/PPAN/DNAJA3/PINX1/GABPB1/PRMT1/CTPS1/NOLC1/RUVBL2/TRMT2A/ODC1/RUVBL1/PPID/METAP2/BID/MUC13/SNRPA1/IFRD2
ZHAN_MULTIPLE_MYELOMA_CD1_UP	44	0.443325	1.4076	0.0559905	0.11679	0.0654458	4329	tags=34%, list=15%, signal=29%	SLC7A11/TOX2/ATF5/BATF3/STC2/RAB31/ALPK2/ZNF70/TRIB3/ADRB1/BGLAP/RTL5/CEBPB/VPS37A/ITGAL
RIGGI_EWING_SARCOMA_PROGENITOR_DN	186	0.350728	1.40682	0.00959639	0.0326277	0.0182836	2554	tags=24%, list=9%, signal=22%	DCN/C1S/MME/STC1/C1R/PTGFR/PDE7B/DPYD/HAS2/GPC6/IL1R1/PCOLCE2/ADAM12/SVEP1/RPS6KA2/GFPT2/PDE4B/RUNX2/SRPX/DUSP4/NRP1/STC2/WLS/IL13RA2/SHCBP1/PDK1/BICC1/CCN5/BEND6/GLT8D2/CCBE1/ZNF503/GALNT15/ETV1/PBK/GNG2/ADORA2B/MMP16/CA12/SOBP/NAMPT/GXYLT2/PRC1/PTGS1
CASORELLI_APL_SECONDARY_VS_DE_NOVO_UP	38	0.453745	1.40562	0.0636678	0.128596	0.0720618	2852	tags=37%, list=10%, signal=33%	ENC1/FOS/TRIM27/SLC38A6/FOSB/FBN2/TMEM35B/EVI2B/TGFA/ANXA5/SLFN12/MARC1/LAMC1/NAGPA
LEE_LIVER_CANCER_MYC_TGFA_DN	50	0.432036	1.40557	0.0512084	0.108667	0.0608939	2770	tags=22%, list=10%, signal=20%	KYNU/HSD11B1/SLC25A22/CMAHP/ETNK2/NR1H3/ELOVL5/TDO2/PTP4A3/SLC27A5/MARC1
SUNG_METASTASIS_STROMA_UP	107	0.376497	1.40537	0.0248062	0.0651562	0.0365117	908	tags=17%, list=3%, signal=16%	PLOD2/PROS1/AKR1C1/HIST1H2AC/PLK2/P4HA1/IFI6/PLOD1/SVEP1/CD59/TNC/COL12A1/BNIP3L/FABP5/SEL1L3/PTGS2/GOLM1/ANOS1
FERNANDEZ_BOUND_BY_MYC	171	0.353784	1.40526	0.00981217	0.0329594	0.0184695	5083	tags=40%, list=18%, signal=33%	HMOX1/COL4A2/TFRC/MUC1/ICAM1/MDM2/EPHX1/HIF1A/HSPA8/CASP8/ARF4/CXCL2/BAX/AMD1/SLC19A1/COL4A1/EIF4E/TOP1/FGFR4/NR1D1/ENO1/TXN/JUN/HSPD1/HERPUD1/DKC1/ATP1A2/SLC4A2/POLB/HMBS/ITGB1/TPM2/QDPR/EIF4A1/ACO2/PHB/PAICS/BCL3/NME1/CSTB/ATF4/MSN/RBM3/PDHA1/PPID/IRF3/UROD/SLC9A3R2/FPGS/HSPE1/RARA/IFRD2/CD63/NTHL1/TCIRG1/POLD2/NBN/STAT6/PEX3/PRKDC/LTB/FXN/RNASEH2A/TGFB2/MCL1/NEFM/BCL2/RPL13A/UBA52
REACTOME_REGULATION_OF_HSF1_MEDIATED_HEAT_SHOCK_RESPONSE	80	0.394852	1.40507	0.0314402	0.0772736	0.0433019	4439	tags=31%, list=16%, signal=26%	SERPINH1/BAG2/HSPA8/DNAJC2/SEH1L/HSPA13/BAG3/HSPA4/HSPA1A/HSPH1/HSPA14/NUP54/NUP62/MRPL18/HSPA6/RPS19BP1/TNFRSF21/NUP35/NUP43/DNAJC7/NUP93/HIKESHI/ST13/HSPA5/HSPA1B
FARMER_BREAST_CANCER_APOCRINE_VS_LUMINAL	310	0.331487	1.40499	0.00321958	0.0147263	0.0082522	3102	tags=25%, list=11%, signal=22%	RTN1/S100A8/KYNU/PDZK1IP1/S100A9/PCDH7/CXCL8/PAPSS2/PMAIP1/PON2/VLDLR/P4HA1/BNIP3/AKR1B10/QSOX1/PAM/MDM2/CES1/LIMCH1/DAP/ENO2/AR/PNP/CLIC3/GPRC5B/VEGFA/TACC2/SERPINA5/IFI35/PGRMC1/G6PD/ERGIC2/SSR1/PGK1/PPIF/POLG2/DDAH2/TBL1X/NDNF/ASS1/RIOX2/ANP32E/CHST1/OASL/SEC23B/ECHDC1/IGFBP4/NAAA/TNFSF4/STYK1/PNMA1/DDC/GREB1/MYL6B/CYB5A/SREK1/TSPAN3/NAMPT/MARCH3/ACSL1/ACAD8/MSMO1/U2SURP/SAR1B/BST2/ADAM9/CSTB/…
ROSS_AML_WITH_MLL_FUSIONS	73	0.400594	1.40496	0.0350746	0.0825603	0.0462644	2976	tags=19%, list=10%, signal=17%	CFB/SRGN/ALOX5AP/CES1/MVP/ALDH3B1/ACSL4/HEXB/AK2/ANXA5/PLD3/PGAM1/PREB/MRPL34
REACTOME_PTEN_REGULATION	135	0.36416	1.40492	0.0159405	0.047174	0.026435	6503	tags=48%, list=23%, signal=37%	CBX6/SNAI1/PML/PSMB8/PSMC5/TRIM27/PSME3/JUN/STUB1/PSMB10/EED/PSMA6/PSMC4/PSMB9/HDAC1/PSMD10/PSME2/PSMA5/PHC2/PSMD7/PSMD13/PSMB5/PSMD11/PPARG/PSME1/PSMA2/CHD3/PSMA1/PSMC3/RHEB/RPS27A/LAMTOR3/PSMD2/MTOR/LAMTOR5/MOV10/UBC/PSMD4/RING1/PSMC2/PSMB6/XIAP/PSMA7/PSMD12/PSMD14/MBD3/PSMB4/MLST8/UBA52/PSMB3/PSMA3/LAMTOR1/LAMTOR4/RRAGA/EZH2/PSMC6/PSMB7/CHD4/PTEN/HDAC3/CSNK2B/LAMTOR2/PSMB1/CBX4/PSMB2
TIEN_INTESTINE_PROBIOTICS_2HR_DN	88	0.387582	1.40464	0.0300867	0.0747283	0.0418756	2743	tags=26%, list=10%, signal=24%	TIGAR/FERMT2/UFM1/DBN1/NOC3L/FKBP11/RDH11/PTGS2/ZMYND8/SAMM50/TAF1A/AK6/EFCAB2/CKAP4/HSPA13/EED/BAZ1A/MAP4K4/TIAL1/GINS3/GEMIN2/WWTR1/NCK1
REACTOME_HDACS_DEACETYLATE_HISTONES	85	0.389904	1.40427	0.0318745	0.0775943	0.0434816	3434	tags=21%, list=12%, signal=19%	HIST1H2AC/HIST2H2BF/HIST1H2BK/HIST2H2AA4/HIST1H3G/HIST1H2BG/HIST1H2BD/HIST2H4A/TBL1X/SAP30/HDAC1/HIST1H2BN/HIST2H2BE/HIST1H3H/CHD3/HIST1H2BJ/GPS2/SAP18
REACTOME_HS_GAG_BIOSYNTHESIS	28	0.484525	1.40425	0.0791497	0.151511	0.0849023	3235	tags=36%, list=11%, signal=32%	SDC3/GPC6/HS3ST3B1/SDC2/GPC1/HS3ST3A1/HS6ST2/HS3ST2/AGRN/GPC2
DELPUECH_FOXO3_TARGETS_DN	38	0.453196	1.40392	0.0643599	0.129527	0.0725833	4604	tags=50%, list=16%, signal=42%	AREG/GADD45A/AURKA/VEGFA/EFNB2/ZWINT/MTHFD2/PYCR1/AARS/TIAL1/HAX1/PRC1/SMC4/EXOSC8/IMPDH2/LARS/UBE2C/APEX1/DTYMK
FALVELLA_SMOKERS_WITH_LUNG_CANCER	76	0.397246	1.40352	0.0345345	0.0816659	0.0457632	4002	tags=34%, list=14%, signal=29%	C1S/STC1/SOD2/MAT2A/UFM1/EZR/CCL20/ADAMTS1/HOXC8/TOP1/DUSP1/HSPD1/SERPINB2/ZFP36L2/SEC61A1/APOL6/FUS/ENG/NAMPT/MVD/HSP90AB1/MATR3/NR4A3/SUPT16H/SRPRA/IL6ST
RIZKI_TUMOR_INVASIVENESS_3D_DN	243	0.339471	1.40324	0.00488251	0.0198672	0.011133	4081	tags=29%, list=14%, signal=25%	PROS1/NRXN3/IL32/IL1R1/CHN1/HPCAL1/CEMIP2/UBE2L6/SNTB1/ALG1/GAPDH/CD83/DOK1/SLC16A3/DUSP4/CFAP45/ZNF330/CASP1/SP110/IL1R2/PWP2/UBA7/HCCS/HSPA13/YWHAG/NEU1/SRRT/HSPA1A/TXNL1/PRMT1/PON3/PLXNC1/PEA15/CCT4/RPP38/SLCO2B1/SLC25A4/HM13/RTCB/IFI30/NDUFB5/TPM2/USP15/RBM4/VDAC1/DPF1/PHKG2/HIST2H2BE/IKBKE/HSPA6/P2RX5/HMGCL/PRDX6/TMED9/PSME1/P2RX6/KRT7/FKBP1A/LAGE3/SNRPE/EIF3E/GFM2/RNF11/POLR2L/KAT2B/SCN1B/M…
HOFMANN_MYELODYSPLASTIC_SYNDROM_LOW_RISK_DN	26	0.492459	1.40308	0.0802952	0.152896	0.0856784	3753	tags=50%, list=13%, signal=43%	FERMT2/TXNRD1/GDF15/CCND1/STIP1/CKAP4/HSPA4/IER3/KRT8/PSMD13/PSMD11/UBE2M/TUBB2A
GOLDRATH_IMMUNE_MEMORY	63	0.410439	1.40195	0.0449903	0.098901	0.0554213	2282	tags=25%, list=8%, signal=23%	PROS1/IL15RA/F2R/GPC1/ANGPTL4/VKORC1/PRNP/BAG3/RRM2B/AQP9/MAPK12/RECK/ANTXR2/PRKCE/ZMAT3/EOMES
ZAMORA_NOS2_TARGETS_DN	74	0.39746	1.40166	0.0361565	0.0845217	0.0473636	4342	tags=32%, list=15%, signal=28%	ALOX5AP/FTL/GALK1/GCLM/SORD/RARS/LONP1/MGAT1/PEA15/EIF3B/RIPK1/VDAC1/EIF2S2/ZFP36L1/TSPAN4/STAT3/CTSZ/EIF5AL1/SCN1B/NFIA/ATP5F1D/ACTB/UBC/ATP6V0C
REACTOME_DNA_METHYLATION	55	0.421752	1.40155	0.0464165	0.101176	0.0566964	3536	tags=24%, list=12%, signal=21%	HIST1H2AC/HIST1H2BK/HIST2H2AA4/HIST1H3G/HIST1H2BG/HIST1H2BD/HIST2H4A/HIST1H2BN/HIST2H2BE/HIST1H3H/H2AFX/HIST1H2BJ/H2AFZ
KEGG_RIG_I_LIKE_RECEPTOR_SIGNALING_PATHWAY	54	0.423406	1.40124	0.0475276	0.102708	0.0575546	4233	tags=35%, list=15%, signal=30%	CXCL8/IKBKG/CASP8/TMEM173/ATG12/MAPK12/ISG15/MAP3K7/FADD/RIPK1/SIKE1/IKBKE/IL12A/IRF3/CASP10/TRAF2/AZI2/PIN1/TRADD
LEE_LIVER_CANCER_SURVIVAL_DN	179	0.350689	1.40101	0.0101637	0.0336956	0.0188821	5898	tags=40%, list=21%, signal=32%	SERPINH1/MAPRE1/HIF1A/PNP/MRPL42/FABP5/CCT6A/LAMB1/MTHFD2/NOP56/NCBP2/PHLDA2/NSF/HIST2H4A/ARHGAP18/KIF5B/GTPBP4/HDDC2/TMSB4X/LYAR/BUB3/CCT5/IER3/DYNLL1/CKS2/S100A6/CALM2/PRMT1/RGS2/ATP2B1/SEPT7/TSPAN3/MARCKS/KRT10/ODC1/AGRN/RPE/URI1/SFT2D1/PDLIM7/SNRPB2/RAN/EIF4A3/RPL9/YWHAB/UBE2T/PDCD5/PCLAF/CCNB1/ATP5F1C/SET/RWDD1/OPLAH/JPT1/RBX1/TPRKB/RPL17/CBX3/CDCA8/RPS3/HMGN1/RPS3A/SPC25/HIST1H4A/NAP1L1/SUM…
CHANDRAN_METASTASIS_TOP50_UP	37	0.454037	1.39935	0.0643826	0.129527	0.0725833	6892	tags=51%, list=24%, signal=39%	AR/ENTR1/NOL8/GNL3L/GRB2/METTL2B/HSPD1/BASP1/HSP90AA1/G3BP1/JPT1/LARP1/GRINA/NUCKS1/SOD1/KMT5B/CBX4/AK4/MSI2
REACTOME_ANTIVIRAL_MECHANISM_BY_IFN_STIMULATED_GENES	82	0.390659	1.39781	0.0343782	0.081485	0.0456619	4216	tags=33%, list=15%, signal=28%	IFIT1/UBE2L6/EIF4E/KPNA2/UBA7/SEH1L/STAT1/OASL/ISG15/NUP54/NUP62/EIF4E2/FLNA/EIF4A1/ABCE1/NUP35/NUP43/IRF3/USP18/KPNA4/EIF4A3/NUP93/RPS27A/UBC/PIN1/EIF4G1/KPNA5
ZHOU_CELL_CYCLE_GENES_IN_IR_RESPONSE_24HR	123	0.367064	1.39764	0.0196902	0.0547923	0.030704	4785	tags=32%, list=17%, signal=26%	DCN/PIMREG/NEIL3/FABP5/MCM8/LAMB1/EIF2S1/CDC20/FGFR1OP/KPNA2/CHAC2/ODF2/GINS3/LMNB1/PRC1/CMC2/CACYBP/PAICS/H2AFX/MAGOHB/CENPK/CDK1/ALYREF/TOP2A/EXOSC8/SPAG5/PARPBP/UBE2T/CCNB1/CENPN/JPT1/UBE2C/BIRC5/HMGB3/TPRKB/DTYMK/RANBP1/POLD1/CDCA8
MATTIOLI_MGUS_VS_PCL	100	0.378589	1.39704	0.0263294	0.0677041	0.0379395	5398	tags=43%, list=19%, signal=35%	S100A8/CXCL8/PPBP/ASF1A/B2M/RRP9/CDC73/ENO1/SAP30/EXOSC4/EXOSC2/ITPA/CCT4/PSMC4/FADD/NUP62/CCT3/PRDX3/SMARCA4/PAICS/LPCAT4/RUVBL1/ABCE1/WDR18/G3BP1/SSR4/AP3D1/CKS1B/RAN/GADD45B/MRPL58/TUBB/NASP/TBCB/LAPTM4B/PSMD4/RPLP1/HNRNPF/SNRPF/PSMA3/GGT1/PFN1/PPP1R15A
REACTOME_PHASE_II_CONJUGATION_OF_COMPOUNDS	87	0.386255	1.39638	0.0316165	0.0772736	0.0433019	3097	tags=28%, list=11%, signal=25%	UGP2/GGT5/PAPSS2/UGDH/MAT2A/SLC26A2/GCLM/CHAC1/SLC35B2/MGST1/TPST1/TPMT/CHAC2/GCLC/NNMT/N6AMT1/ABHD10/SLC35B3/GSS/NAT1/GSTO1/GSTA2/CNDP2/GSTZ1
KINSEY_TARGETS_OF_EWSR1_FLII_FUSION_DN	324	0.32816	1.39608	0.00292873	0.0138088	0.00773807	2830	tags=23%, list=10%, signal=21%	PID1/VIM/ATOH8/AKR1C1/LOX/LGALS3BP/CCDC80/AKR1C3/PAPSS2/FBN1/TIMP2/HIST1H2AC/CCN3/DSEL/PRSS23/QSOX1/HEXA/FN1/TAGLN/LIMCH1/SAT1/CD59/TNC/LZTS3/FOXO1/SEZ6L2/MVP/PSAP/SELENBP1/CEP164/PLAU/DLC1/SIPA1L2/FSTL1/ZCCHC24/RBMS3/GEM/RGS5/MAGED1/NLRP1/NUDT17/ECE1/PTX3/TMSB4X/LINC00963/C4orf3/EPHA3/DLX1/NEU1/TGFBR2/SMOX/IER3/SHISA2/SEPT6/ISG15/CLEC2B/FAM214B/METRNL/GRN/MSRB2/SPHK1/ZYX/SELENOP/ATP2B1/TFPI/HIST…
SHETH_LIVER_CANCER_VS_TXNIP_LOSS_PAM1	235	0.338643	1.39545	0.00752106	0.0274308	0.0153714	2778	tags=24%, list=10%, signal=22%	OSGIN1/LOX/MFGE8/TGM2/GPC6/TFRC/MAT2A/PRSS23/PVR/HEXA/CYP27B1/E2F3/ENC1/PLAU/PLIN3/APEX2/CASP1/CDC20/COL4A1/DNAJC12/NOL11/TRIB2/BICC1/C12orf45/TPMT/PYCR1/RRBP1/IER5/CKAP4/ERCC8/TP53RK/SRD5A3/PSPH/DYNLL1/CHKA/LIMK1/TMEM167A/APLN/EHMT2/PEA15/CTPS1/KCNE3/GREB1/SNCA/DDIT4/SECTM1/TRIB3/CD320/IKBKE/UBE2S/RFLNB/NEK6/SMC4/CSTB/ANO10/ATF4
PHONG_TNF_RESPONSE_NOT_VIA_P38	338	0.325921	1.39533	0.00194112	0.0103435	0.00579621	3571	tags=30%, list=13%, signal=26%	SRGN/TRIM16/SYDE1/ADGRE5/KCNAB2/SOD2/BIRC3/TNFRSF6B/BAMBI/SLCO4A1/NXN/SLC25A22/SLC22A4/GBP1/PRSS23/SLC2A6/GADD45A/ICAM1/TNIP1/FLOT1/ABLIM3/GFPT2/TGOLN2/CD83/GPRC5B/ADAMTS9/DENND5A/LDLR/PLCB4/ATF5/NR2F1/TMEM132A/PLAU/TMEM156/SP100/GEM/GCHFR/PHLDA2/STK10/PPIF/IER2/NFKB2/RELB/LOXL2/HLA-B/FLG/PLAUR/TNFRSF10B/ECE1/NMI/IER5/INF2/TNFRSF9/HLA-A/DDA1/FSTL3/MPHOSPH10/JUN/SMOX/CSF1/ZFP36L2/C1QTNF1/PDLIM5/ET…
KANG_DOXORUBICIN_RESISTANCE_UP	54	0.421561	1.39513	0.0506481	0.107702	0.0603531	4785	tags=35%, list=17%, signal=29%	NQO1/AURKA/ZWINT/CDC20/TYMS/FOSB/PBK/TPX2/LMNB1/PRC1/DSCC1/GINS1/CDK1/TOP2A/CENPM/PCLAF/BIRC5/DTYMK/CDCA8
DOUGLAS_BMI1_TARGETS_DN	305	0.330223	1.39496	0.00324044	0.0147996	0.00829329	2795	tags=23%, list=10%, signal=21%	SQSTM1/SLC39A8/IL7R/BIRC3/SLC7A11/IFIT3/IL32/IFI6/MPV17/IFIT1/DUSP3/CSRNP3/ICAM1/UNKL/CLIC2/ACTA2/INSIG1/MVP/CASP8/MOCS2/IFIT2/GNPDA1/UROS/IFI35/TNFAIP3/SP100/TDG/ACSL4/SDE2/EGF/GRIK2/NFKB2/TMEM144/TOR1B/TNFRSF9/NEU1/STAT1/TMEM63A/RWDD2B/NECAP1/IRF9/TPM3/ECH1/N6AMT1/PAG1/RPIA/PSMB9/ADAL/RAP2C/NSRP1/IFT46/ARL6IP1/PARM1/ACAD9/MR1/TSPAN31/LCP1/OXNAD1/PAFAH2/B4GALT6/KLHL18/ISL1/STYXL1/BST2/BPGM/JKAMP…
SCHLOSSER_MYC_AND_SERUM_RESPONSE_SYNERGY	32	0.46786	1.39486	0.0723414	0.141267	0.0791617	5533	tags=66%, list=19%, signal=53%	FARSA/NCLN/CCDC85B/PYCR1/SRM/EIF4A1/ARFIP2/SCAMP3/MRPS12/DDX28/CXorf40A/METAP2/NME4/FPGS/SGTA/POLR2I/MRPL12/TAGLN2/LARP1/NDUFS5/ARMC6
PID_CD8_TCR_DOWNSTREAM_PATHWAY	45	0.43701	1.3948	0.0640417	0.129148	0.0723708	2282	tags=24%, list=8%, signal=23%	STAT4/FOS/B2M/FOSL1/PRKCQ/TNFRSF9/HLA-A/JUN/PRKCE/EGR4/EOMES
REACTOME_TRANSCRIPTIONAL_REGULATION_BY_RUNX3	94	0.380973	1.39427	0.0295782	0.0737647	0.0413356	5167	tags=45%, list=18%, signal=37%	CDKN1A/MDM2/CCND1/PSMB8/PSMC5/PSME3/PSMB10/PSMA6/PSMC4/PSMB9/PSMD10/PSME2/PSMA5/PSMD7/WWTR1/PSMD13/PSMB5/CCN2/PSMD11/PSME1/PSMA2/PSMA1/PSMC3/HES1/KAT2B/RPS27A/PSMD2/MAMLD1/UBC/PSMD4/ITGAL/PSMC2/PSMB6/PSMA7/PSMD12/PSMD14/SNW1/CBFB/PSMB4/UBA52/PSMB3/PSMA3
NATSUME_RESPONSE_TO_INTERFERON_BETA_DN	48	0.432006	1.39425	0.0566308	0.117885	0.0660592	6769	tags=58%, list=24%, signal=45%	CDKN1C/FTL/FTH1/GAPDH/TP53I3/PRDX1/TXN/GAS6/TPM2/GSTO1/PRDX6/TNFRSF25/CD63/SKP1/SLIRP/PPP2CA/XRCC5/PIN1/NDUFB3/RPLP1/SEC61B/SHC1/IGFBP6/SOD1/HINT1/RPS2/TRAF3/NFKBIA
BOYLAN_MULTIPLE_MYELOMA_D_UP	85	0.387097	1.39416	0.0349102	0.0823493	0.0461462	3917	tags=33%, list=14%, signal=28%	ASPH/PLK2/PRSS23/CCND1/FABP5/FSTL1/OBSCN/TRMT61A/AARS/RRM2B/SPATS2/CLYBL/FUT11/USP15/EIF5/ISL1/ARL4A/GSTO1/TGS1/SLC47A1/ADGRL2/DDIT3/BLVRB/CHST7/TIMM9/NSMF/YDJC/APOPT1
TENEDINI_MEGAKARYOCYTE_MARKERS	56	0.417783	1.39369	0.051146	0.10861	0.0608618	1414	tags=21%, list=5%, signal=20%	CXCL8/PPBP/IL1R1/IL1B/PDGFC/CXCL1/MAFG/VEGFA/FOS/ITGB3/STAT1/CCND3
NGUYEN_NOTCH1_TARGETS_UP	27	0.482965	1.39252	0.0844723	0.1586	0.0888747	2618	tags=33%, list=9%, signal=30%	CNTN1/FLOT1/TAGLN/ANXA6/F2R/ARL6IP5/HDAC1/SEC62/PHB2
REACTOME_MITOTIC_G2_G2_M_PHASES	195	0.344742	1.39232	0.00985638	0.0330707	0.0185319	5183	tags=39%, list=18%, signal=32%	CDKN1A/TUBAL3/MAPRE1/E2F3/AURKA/GTSE1/CEP164/PSMB8/CCNH/PSMC5/PSME3/FGFR1OP/PHLDA1/CDK5RAP2/YWHAG/PSMB10/DYNLL1/MZT1/DCTN1/PSMA6/TUBA1C/ODF2/PSMC4/PSMB9/PPP2CB/HAUS2/TPX2/PSMD10/PSME2/PSMA5/PSMD7/CEP41/PSMD13/CSNK1D/PSMB5/HSP90AA1/CEP290/PSMD11/HSP90AB1/PSME1/CEP192/PSMA2/NME7/PSMA1/TUBB3/PSMC3/CDK1/TUBB4B/CEP63/TUBB2A/RPS27A/PSMD2/SKP1/FBXL18/TUBB/PPP2CA/TUBA8/TUBB6/CCNB1/UBC/PSMD4/RBX1/PSMC2/PS…
VANTVEER_BREAST_CANCER_ESR1_DN	262	0.333598	1.39181	0.00546117	0.0217729	0.0122009	2838	tags=21%, list=10%, signal=19%	SRGN/KRT16/CA9/PDZK1IP1/UGP2/COLGALT1/SOD2/CHST2/IFRD1/PSAT1/GBP1/SLC2A6/IL15RA/PIMREG/HIF1A/QSOX2/GAPDH/TM4SF1/GPRC5B/SRSF7/RRP1/BIN1/TNFAIP3/AMD1/SLC35C1/RAB6B/CYBA/CDC20/CCDC71L/UGT8/PGM1/TMEM45A/DUSP2/RBMS1/NMI/ENO1/ASS1/GLIPR2/SERBP1/ST8SIA1/RNF114/SLC43A3/EPHA2/SLAMF8/CTPS1/APOBEC3B/DUSP9/PFKP/NRBF2/KIF2C/CSTB/TNFRSF21/NCK1/ODC1/MSN
GRAHAM_CML_QUIESCENT_VS_NORMAL_DIVIDING_UP	48	0.430968	1.3909	0.0583035	0.119979	0.0672327	1501	tags=29%, list=5%, signal=28%	AKR1C1/CXCL8/SOD2/PMAIP1/HIST1H2AC/IL1B/GBP1/CXCL2/CCL20/PTGS2/PTX3/JUN/SERPINB2/HIST1H1C
PURBEY_TARGETS_OF_CTBP1_AND_SATB1_DN	154	0.354734	1.38941	0.0168555	0.0491217	0.0275264	4437	tags=33%, list=16%, signal=28%	CBX6/SCNN1B/MDM2/ICOSLG/CCDC88A/ALDH1B1/FARSA/UBXN8/NOL8/PPIF/GATC/SORD/MGLL/AIFM2/AIMP2/HYAL2/TMEM38B/EIF3J/EDC3/PON3/PHF5A/RPP14/TIAL1/HAX1/MRPL1/SRPRB/DIO2/WDR46/TIMM23/TOB2/TMED1/HNRNPL/SNRNP40/CCDC22/EXOSC3/GLS/MAP2K2/PAF1/DDX28/HIF3A/ROBO1/TMEM222/TRIM14/MSTO1/GBAP1/MED16/CENPN/RAP1A/HYAL3/PRCC/GUCY1B2
MUNSHI_MULTIPLE_MYELOMA_UP	77	0.392811	1.38932	0.0376884	0.0869078	0.0487006	4865	tags=40%, list=17%, signal=33%	HCLS1/S100A4/ABCC3/XBP1/FOS/PIM2/RELB/CYB561D2/JUN/CSF1/KRT8/IFITM1/CALM2/HAX1/PSME2/FLT3LG/UQCR11/PSMA2/SSR4/HSPE1/RAN/KPNA4/CD63/XRCC5/CXCR4/UBC/CALR/HSPA5/FKBP2/LDHB/MCL1
HARRIS_BRAIN_CANCER_PROGENITORS	35	0.45627	1.38893	0.0708066	0.139247	0.07803	1952	tags=26%, list=7%, signal=24%	PID1/PAPSS2/AOX1/WNT5A/S100A4/BGN/SHISA2/S100A6/DDC
KIM_ALL_DISORDERS_DURATION_CORR_DN	138	0.359549	1.38888	0.0177658	0.0508069	0.0284707	7104	tags=49%, list=25%, signal=37%	AKR1B1/LMAN2L/GNPDA1/SNX6/GDI1/DEGS1/NIPSNAP1/TRAPPC12/DHX30/ATP6V0B/NUDC/CREB3/CLTA/SUMO3/TALDO1/HAX1/EIF3G/RUVBL2/AHSA1/ARL4A/PSMB5/TPI1/ATP5MC1/CCT7/GRHPR/TUFM/EIF6/PES1/ETFB/PEF1/COL9A3/RAP1GAP2/ENDOG/NUP93/SPAG7/STOML1/NTHL1/PIN1/ATOX1/IMPDH2/NDUFB1/UQCRQ/PUF60/ARRB2/SUCLG1/PMP22/NDUFAF3/SF3B2/SLC25A11/UQCRB/DCXR/AMPD2/TAX1BP1/NELFE/COX7C/ECSIT/ECI1/ARPC2/STARD7/PTGDS/GPX1/PFDN1/HCFC1R1/CHMP…
LEE_TARGETS_OF_PTCH1_AND_SUFU_UP	50	0.426877	1.38879	0.0569514	0.118391	0.0663429	3230	tags=30%, list=11%, signal=27%	ZEB1/PLEKHO2/CCND1/B2M/MTHFD2/PPAN/HK2/SOX18/LAP3/IER5/IRS1/C4A/MAGOHB/CAVIN2/PTCH2
BERENJENO_ROCK_SIGNALING_NOT_VIA_RHOA_UP	26	0.487217	1.38815	0.0849922	0.158971	0.0890826	2219	tags=27%, list=8%, signal=25%	PTGFR/PTGR1/NQO1/EPHX1/ATF3/SEC61A1/TRIB3
SATO_SILENCED_BY_DEACETYLATION_IN_PANCREATIC_CANCER	42	0.440108	1.38672	0.0692976	0.136984	0.0767618	2863	tags=33%, list=10%, signal=30%	HMOX1/STC1/CXCL8/CDKN1C/AREG/GDF15/CAPN5/ATF3/ULBP2/HIST1H1C/EGR4/CACNA1G/CCN2/SPANXA1
YAO_TEMPORAL_RESPONSE_TO_PROGESTERONE_CLUSTER_0	68	0.400687	1.3867	0.0470443	0.102169	0.0572524	1605	tags=19%, list=6%, signal=18%	IGFBP3/PROS1/LOX/ALDOC/AOX1/BNIP3/EPHX1/GEM/ALAS1/NR1D1/TEF/RECK/ATP1A2
NATSUME_RESPONSE_TO_INTERFERON_BETA_UP	63	0.405899	1.38644	0.0503405	0.107197	0.06007	3686	tags=33%, list=13%, signal=29%	IGFBP3/TNFSF14/DNAJA1/IL15RA/IFITM3/FGF5/HLA-B/STAT1/HSPA4/CALM2/RGS2/CREM/CASP7/FAS/BCL3/TGFBR3/KDM5A/MAP3K14/HLA-C/DDIT3/SFPQ
REACTOME_TP53_REGULATES_TRANSCRIPTION_OF_CELL_DEATH_GENES	44	0.436652	1.38641	0.0671412	0.133758	0.0749541	1323	tags=25%, list=5%, signal=24%	IGFBP3/TNFRSF10D/PMAIP1/BNIP3L/TP53I3/BAX/CASP1/TNFRSF10B/TRIAP1/AIFM2/TNFRSF10A
REACTOME_IRE1ALPHA_ACTIVATES_CHAPERONES	50	0.425909	1.38564	0.0579086	0.119649	0.0670479	6686	tags=54%, list=23%, signal=41%	KDELR3/EXTL2/GOSR2/XBP1/SSR1/DNAJB9/DCTN1/FKBP14/MYDGF/SRPRB/PREB/TSPYL2/ERN1/TLN1/SRPRA/CXXC1/ARFGAP1/SERP1/HSPA5/ACADVL/WFS1/SHC1/EDEM1/DNAJB11/PPP2R5B/ZBTB17/PDIA5
KIM_WT1_TARGETS_8HR_UP	166	0.350603	1.38561	0.0153674	0.046012	0.0257838	5235	tags=41%, list=18%, signal=34%	PCDH7/AREG/GLRX/FGFR1/SERPINH1/PDGFC/ENO2/GFPT2/TM4SF1/RSL1D1/DNAJB4/FHOD1/ERGIC2/GEM/PHLDA2/FOSL1/PLAUR/SLC35G2/TOP1/TPBG/DNAJB5/SON/JUN/ULBP2/CSF1/ATP1A2/HSPA1A/PODXL/PEA15/HSPH1/KLF10/SPHK1/CA12/ZYX/ATP2B1/ADAM19/ARC/PA2G4/B4GALT6/HSPA6/HNRNPL/WWTR1/RBM8A/HSP90AA1/SRP72/HBEGF/CDR2L/METAP2/PDE10A/EIF5A/ABHD3/PLXND1/LYN/RGS4/NLK/IL6ST/SLC20A1/SET/BTG3/HSPA1B/SRSF6/SFN/ST3GAL1/CBFB/DPEP3/DAB2/PLE…
REACTOME_SENESCENCE_ASSOCIATED_SECRETORY_PHENOTYPE_SASP	100	0.375419	1.38535	0.0286526	0.0721847	0.0404503	4391	tags=30%, list=15%, signal=25%	CDKN1A/CXCL8/HIST1H2AC/IL1A/RPS6KA2/HIST1H2BK/HIST2H2AA4/HIST1H3G/FOS/HIST1H2BG/HIST1H2BD/HIST2H4A/CDKN2C/JUN/ANAPC7/EHMT2/HIST1H2BN/HIST2H2BE/CDC26/HIST1H3H/H2AFX/ANAPC4/HIST1H2BJ/H2AFZ/STAT3/CEBPB/RPS27A/UBC/HIST1H2BC/UBE2C
REACTOME_ASSOCIATION_OF_TRIC_CCT_WITH_TARGET_PROTEINS_DURING_BIOSYNTHESIS	38	0.447024	1.3848	0.0742791	0.144039	0.0807156	3909	tags=45%, list=14%, signal=39%	CCT6A/NOP56/CCT2/FBXL5/CCT5/TCP1/CCT4/SPHK1/CCT3/FKBP9/WRAP53/CCT8/SKIV2L/CCT7/FBXW10/STAT3/USP11
LUI_TARGETS_OF_PAX8_PPARG_FUSION	34	0.457368	1.38397	0.0724438	0.141286	0.0791728	5058	tags=47%, list=18%, signal=39%	DNAJA1/HSPA8/B2M/SRSF3/EIF3G/ODC1/HSP90AB1/UQCR11/RPS12/RTN4/RAN/SKP1/RPL17/UBE2E3/ATP5F1A/ERGIC3
KAYO_AGING_MUSCLE_UP	208	0.340254	1.3835	0.00981241	0.0329594	0.0184695	2189	tags=17%, list=8%, signal=16%	RTN1/PDE3B/CDKN1A/SERPINA3/PTGFR/DPYD/ASPH/AOX1/HCLS1/MPV17/POP1/FOXO1/TIMM17A/PDE4B/AR/MT1F/EZR/CD83/CBS/GCNT2/AMD1/GLA/IER2/ITGB3/RBM34/FBN2/CSF1/FAH/HSPA1A/CUX1/FUT8/GRN/SLC5A2/BTN2A1/FAM53B/STX1A
REACTOME_DNA_REPAIR	324	0.325025	1.38274	0.00357956	0.0157152	0.00880633	5894	tags=34%, list=21%, signal=27%	COPS8/HIST1H2AC/UBE2V2/LIG4/UBE2L6/HIST1H2BK/NEIL3/HIST2H2AA4/HIST1H2BG/NEIL2/CCNH/TDG/POLM/POLE3/HIST1H2BD/HIST2H4A/ERCC1/PPP5C/GTF2H2/PARP2/KPNA2/UBA7/ERCC2/ERCC8/ALKBH5/CLSPN/VCP/ISG15/OGG1/ALKBH2/FEN1/SUMO3/BABAM2/POLB/MBD4/HIST1H2BN/HIST2H2BE/MGMT/COPS7A/PPIE/INO80C/TIPIN/TFPT/FAAP100/MUS81/H2AFX/RUVBL1/POLR2G/ACTR8/POLR2K/TDP2/POLR2C/CENPS/DCLRE1C/TERF2IP/HIST1H2BJ/CENPX/POLE4/H2AFZ/RFC3/PO…
PID_INTEGRIN1_PATHWAY	63	0.4048	1.38269	0.0520428	0.110056	0.0616722	1076	tags=19%, list=4%, signal=18%	ITGA5/FBN1/TGM2/TGFBI/FN1/TNC/VEGFA/PLAU/LAMB1/NPNT/COL4A1/PLAUR
CHESLER_BRAIN_QTL_CIS	65	0.402952	1.38267	0.0499385	0.10674	0.0598139	5072	tags=32%, list=18%, signal=27%	SERPINA3/PAM/ACKR1/MAPRE1/CCND1/ALDH9A1/PHLDA1/TPBG/EEF1AKMT1/C4orf3/RFK/RPP14/RGS16/OCIAD1/ABHD14A/BCAT2/ACAA1/PSMB6/THUMPD1/MRPL48/MTIF2
KEGG_LYSINE_DEGRADATION	44	0.435443	1.38257	0.0690391	0.136649	0.0765744	3107	tags=23%, list=11%, signal=20%	PLOD2/PLOD1/ALDH1B1/ALDH9A1/PLOD3/OGDH/EHMT2/ECHS1/DLST/ACAT2
VALK_AML_CLUSTER_9	30	0.468666	1.38252	0.0836166	0.157845	0.0884518	1175	tags=27%, list=4%, signal=26%	PAPSS2/TGFBI/MSLN/PTPRM/CD59/RPS6KA2/NRP1/MGLL
CHEBOTAEV_GR_TARGETS_DN	109	0.369023	1.38046	0.02702	0.0689585	0.0386424	3343	tags=28%, list=12%, signal=24%	IGFBP3/CFB/MME/NRXN3/CHSY3/CNTN1/NRCAM/LIMCH1/AR/GPAT3/RASA3/AP4B1/GBP3/RSAD1/CA8/COTL1/CACNB4/FKBP10/FKBP14/TNFRSF11B/RBM4/GPRASP2/RHOBTB3/PTGER4/PLAT/MYL9/PALLD/TSC22D1/ZFP36L1/PLCXD2
JIANG_AGING_HYPOTHALAMUS_DN	35	0.453407	1.38022	0.0751604	0.145479	0.0815223	3006	tags=37%, list=11%, signal=33%	DLG4/MGAT2/STIP1/AP2M1/FSTL1/GDI1/KIF5B/DHX30/ATP6V1E1/DNAJA2/PLD3/ACO2/EPRS
REACTOME_COLLAGEN_FORMATION	87	0.381721	1.37999	0.0349312	0.0823493	0.0461462	1428	tags=21%, list=5%, signal=20%	PLOD2/COL8A1/LOX/COLGALT1/COL4A2/P4HA1/PCOLCE2/P4HA3/COL27A1/P3H1/PLOD1/SERPINH1/COL12A1/COL4A1/LOXL2/P4HB/CTSB/PLOD3
PID_NOTCH_PATHWAY	57	0.412054	1.37946	0.0581536	0.119751	0.0671051	2005	tags=16%, list=7%, signal=15%	DNER/CDKN1A/CNTN1/ADAM12/MFAP5/CCND1/ENO1/SSPO/HDAC1
ACOSTA_PROLIFERATION_INDEPENDENT_MYC_TARGETS_UP	83	0.384811	1.37921	0.0404858	0.0920406	0.0515769	5259	tags=45%, list=18%, signal=36%	NQO1/PDCD11/EMC1/GNPDA1/AATF/CUTC/BLMH/SORD/TRIAP1/RIOX2/WDR74/STUB1/EIF3J/CTPS1/NOLC1/DUSP9/SLC39A4/CD320/LAS1L/PEX5/GLS/ODC1/DDX28/RAB3A/PWP1/RGS16/URI1/CLUH/EIF4A3/TMEM161A/XPO6/STEAP1/GCSH/RRP1B/HDHD5/MTRR/TSPO
REACTOME_M_PHASE	380	0.319214	1.37868	0.00202977	0.0106173	0.00594961	5183	tags=31%, list=18%, signal=26%	HIST1H2AC/TUBAL3/MAPRE1/HIST1H2BK/HIST2H2AA4/CEP164/HIST1H3G/ZWINT/HIST1H2BG/PSMB8/PSMC5/SGO2/HIST1H2BD/HIST2H4A/CDC20/PSME3/FGFR1OP/MAD1L1/CDK5RAP2/B9D2/SEH1L/BLZF1/YWHAG/ANAPC7/PSMB10/BUB3/NSL1/DYNLL1/MZT1/NUDC/DCTN1/PSMA6/TUBA1C/ODF2/PSMC4/PSMB9/PPP2CB/HAUS2/NUP54/PSMD10/HIST1H2BN/NUP62/PSME2/PSMA5/HIST2H2BE/CDC26/DYNC1LI1/LMNB1/PSMD7/CEP41/KIF2C/PSMD13/NEK6/CSNK1D/PSMB5/SMC4/HSP90AA1/CEP290/H…
ROY_WOUND_BLOOD_VESSEL_UP	45	0.431947	1.37864	0.0699715	0.138048	0.0773583	1916	tags=31%, list=7%, signal=29%	STC1/CHN1/GBP1/S100A4/ANXA6/SEL1L3/ZWINT/PLAU/SLCO2A1/NRP1/COL4A1/RAB31/PEA15/MCTP1
REACTOME_VIRAL_MESSENGER_RNA_SYNTHESIS	44	0.434174	1.37854	0.0714116	0.140077	0.078495	5820	tags=41%, list=20%, signal=33%	SEH1L/NUP54/NUP62/POLR2G/NUP35/POLR2K/POLR2C/NUP43/POLR2L/POLR2I/NUP93/POLR2D/POLR2H/POLR2F/POLR2B/POLR2E/NUP98/NUP205
REACTOME_NUCLEOBASE_CATABOLISM	33	0.457719	1.37758	0.0769231	0.14832	0.0831146	2225	tags=24%, list=8%, signal=22%	DPYD/PNP/NUDT9/NUDT16/NUDT5/TYMP/ITPA/NT5C3A
REACTOME_BINDING_AND_UPTAKE_OF_LIGANDS_BY_SCAVENGER_RECEPTORS	39	0.44282	1.37744	0.0752887	0.145628	0.0816057	938	tags=15%, list=3%, signal=15%	SAA1/FTL/COL4A2/APOL1/FTH1/COL4A1
TAKEDA_TARGETS_OF_NUP98_HOXA9_FUSION_16D_UP	151	0.352031	1.37732	0.018316	0.0518474	0.0290538	1919	tags=19%, list=7%, signal=17%	IFI44L/IFI44/PTGFR/CFI/IFIT3/CHST2/IFI6/IFIT1/FN1/CES1/LTBP1/LSP1/S1PR3/SLAMF7/IFIT2/PTGS2/DUSP4/GEM/LIF/IFI27/BEND6/STAT1/ADGRA2/OASL/ISG15/IFITM1/CFD/EPSTI1
KORKOLA_TERATOMA	38	0.444555	1.37715	0.0758939	0.146613	0.0821579	1745	tags=21%, list=6%, signal=20%	DCN/TM4SF1/AURKA/ZWINT/CDC20/JUN/CKS2/FEN1
SMIRNOV_RESPONSE_TO_IR_6HR_DN	106	0.369472	1.3762	0.0318653	0.0775943	0.0434816	2811	tags=23%, list=10%, signal=20%	P4HA1/BNIP3/EGLN3/POLR3G/INSIG1/RIPOR2/AURKA/SLC16A3/LDLR/SLC19A1/HK2/SIPA1/CDC20/IER2/TMEM45A/DUSP2/PDK1/GEMIN4/RGS2/TPX2/CACNA1A/UBE2S/P2RX5/LPCAT4
DUTERTRE_ESTRADIOL_RESPONSE_6HR_UP	222	0.33586	1.37613	0.00972304	0.0328861	0.0184285	4165	tags=35%, list=15%, signal=30%	PLOD2/SLC22A5/SYBU/TGM2/AREG/PDCD11/PRSS23/NIP7/SLC26A2/COL12A1/HIF1A/RRS1/NOL6/DDX21/MCM8/DDX10/PPAN/NOP56/AMD1/GLA/NOP2/TMEM120B/STC2/PPIF/TMEM104/DNAJC12/MRPS23/MAPT/PHLDA1/RAB31/SNX24/TPBG/ISOC1/SEH1L/LYAR/HSPD1/SMOX/DKC1/LRP8/HELLS/WDR4/MYBBP1A/WDR3/FEN1/IGFBP4/CTPS1/CHRNA5/NOLC1/RRP12/GREB1/CA12/SYTL4/GINS3/NR2C2AP/WDR46/PAICS/RUVBL1/MTHFD1L/TMA16/OLFML3/SLC47A1/ABCE1/TMEM64/NPY1R/DSCC1/POL…
LINDGREN_BLADDER_CANCER_HIGH_RECURRENCE	47	0.428234	1.37581	0.0681277	0.135107	0.0757103	2838	tags=38%, list=10%, signal=35%	IL7R/ADGRE5/BIRC3/PAPPA/COL4A2/IL32/SERPINH1/ANXA6/PLCB4/ABI3BP/NR4A1/PELO/MOB3A/ADAM19/HTRA3/RPS19BP1/MYL9/MSN
WEIGEL_OXIDATIVE_STRESS_BY_HNE_AND_H2O2	35	0.451938	1.37575	0.0769936	0.148345	0.0831284	1398	tags=14%, list=5%, signal=14%	CDH2/FGFR1/F2R/CDC20/JUN
LINDGREN_BLADDER_CANCER_CLUSTER_1_DN	368	0.319035	1.37423	0.00302826	0.0140994	0.0079009	3561	tags=26%, list=13%, signal=23%	HMOX1/BIRC3/PAPPA/TIMP2/HCLS1/PDGFRL/COL4A2/IL32/TFRC/SH2D2A/ACOX3/EPHX1/S100A4/HSD3B7/INSIG1/ANXA6/TNC/ENO2/GPX3/PEPD/CXCL1/RGL1/AURKA/ST3GAL2/GTSE1/RRP1/XBP1/ZWINT/MCM8/RPS27L/CTSA/MTHFD2/GEM/SSR1/APEX2/C1orf216/SGO2/WFDC21P/GNL3L/IER2/NFKB2/SLC17A5/TOMM34/LOXL2/CDKN2C/ALAS1/KPNA2/TACC3/P4HB/PYCR1/ABI3BP/NEU1/CDCA2/HSPD1/PREX1/TMEM97/NR4A1/SLC43A3/FAM50A/MGAT1/PEA15/CTPS1/APOBEC3B/THBD/NUP62/RB…
APPIERTO_RESPONSE_TO_FENRETINIDE_DN	51	0.419767	1.37335	0.0613073	0.124702	0.0698792	4312	tags=37%, list=15%, signal=32%	PSAT1/IFITM2/IFITM3/FMNL1/PGK1/TMSB4X/LDHA/SERPINB2/ATP5F1B/SIGMAR1/MTX2/CYB5B/SLC3A1/H2AFZ/BANF1/UGGT2/ATP5PO/SET/MDH1
REACTOME_NONHOMOLOGOUS_END_JOINING_NHEJ	65	0.400235	1.37335	0.0526445	0.111098	0.0622562	5894	tags=35%, list=21%, signal=28%	UBE2V2/LIG4/HIST1H2BK/HIST1H2BG/POLM/HIST1H2BD/HIST2H4A/BABAM2/HIST1H2BN/HIST2H2BE/H2AFX/TDP2/DCLRE1C/HIST1H2BJ/BABAM1/XRCC5/HIST1H2BC/NBN/PRKDC/HIST1H4A/XRCC6/TP53BP1/UBE2N
PID_REG_GR_PATHWAY	74	0.389388	1.3732	0.0473006	0.102333	0.0573445	2617	tags=22%, list=9%, signal=20%	KRT14/CDKN1A/CXCL8/AFP/ICAM1/MDM2/FOS/BAX/PPP5C/STAT1/JUN/NR4A1/HDAC1/NR1I3/SMARCA4/HSP90AA1
ZHAN_MULTIPLE_MYELOMA_CD2_DN	46	0.428693	1.37316	0.0718022	0.140483	0.0787224	4729	tags=43%, list=17%, signal=36%	POLR3G/FABP5/MRPS30/HK2/SORD/TDO2/TXN/CHAC2/LDHA/HIST1H1C/MSRB3/C1orf53/POGLUT1/THEM4/AVEN/ZNF593/NFIA/POLR2H/JPT1/BOP1
HUMMERICH_SKIN_CANCER_PROGRESSION_UP	76	0.388459	1.37247	0.0442943	0.0978632	0.0548398	2957	tags=32%, list=10%, signal=28%	HMOX1/KRT16/CDKN1A/ITGA5/SOD2/CASP8/NCF2/IFITM3/FOS/CASP1/CYBA/PGK1/BLMH/RBMS1/ENO1/SOCS1/TNFRSF1A/S100A6/RGS2/ITGB1/GLTP/RHOC/SERPINB1/TNFRSF12A
PEDRIOLI_MIR31_TARGETS_DN	376	0.317764	1.37187	0.00269088	0.0129472	0.00725524	1464	tags=14%, list=5%, signal=14%	SERPINE2/AKR1C1/STC1/LRG1/AKR1C2/CXCL8/CDKN1C/SOD2/BIRC3/SLC7A11/IFIT3/TNFRSF6B/TNFSF14/IL32/SIAE/NQO1/GLRX/NRCAM/ADGRL3/TXNRD1/TMOD1/IFIT1/ICAM1/MYOM3/FLOT1/SAMD9L/AFAP1L1/DISC1/NCF2/CTSO/CLN8/CXCL2/ADAMTS9/FMNL1/SLC16A3/CCL20/IFIT2/NUDT6/TNFAIP3/NRP1/NFKB2/RELB/CMTM3/SMPDL3B/P4HB/ARL6IP5/EVA1C/TMSB4X/TGFBR2/SPRY4/CACTIN/TSPAN7/WNT10B
REACTOME_SIGNALING_BY_NOTCH	220	0.334606	1.3712	0.0104895	0.0344768	0.0193198	5175	tags=35%, list=18%, signal=29%	DNER/HIST1H2AC/CNTN1/ACTA2/CCND1/HIF1A/HIST1H2BK/E2F3/ST3GAL3/HIST2H2AA4/HIST1H3G/HIST1H2BG/PSMB8/PSMC5/EGF/HIST1H2BD/HIST2H4A/PSME3/TBL1X/TACC3/STAT1/JUN/PSMB10/PSMA6/TLE2/PSMC4/PSMB9/HDAC1/PSMD10/POGLUT1/HIST1H2BN/PSME2/PSMA5/HIST2H2BE/PSMD7/PSMD13/PSMB5/POFUT1/HIST1H3H/PSMD11/H2AFX/PSME1/NCSTN/PSMA2/PSMA1/HIST1H2BJ/HEY2/HDAC9/PSMC3/HES1/PLXND1/H2AFZ/KAT2B/RPS27A/PSMD2/SKP1/TLE1/MAMLD1/HDAC10/M…
PID_P73PATHWAY	78	0.387125	1.37067	0.0424564	0.095177	0.0533345	4770	tags=33%, list=17%, signal=28%	SERPINA1/CDKN1A/NSG1/AEN/GDF15/AFP/MDM2/PML/TP53I3/BIN1/BAX/PLK3/BUB3/PEA15/FAS/BAK1/FBXO45/PFDN5/HEY2/CDK1/NTRK1/CCNB1/PIN1/FLOT2/SFN/NDUFS2
REACTOME_ACTIVATION_OF_KAINATE_RECEPTORS_UPON_GLUTAMATE_BINDING	28	0.472848	1.37041	0.0945274	0.170853	0.095741	3339	tags=29%, list=12%, signal=25%	DLG4/GNG11/GRIK2/PLCB2/GNG2/PLCB3/GNG7/GNG3
OISHI_CHOLANGIOMA_STEM_CELL_LIKE_UP	339	0.320103	1.37032	0.00357375	0.0157122	0.00880465	4520	tags=28%, list=16%, signal=24%	SLC22A5/HKDC1/NRSN2/DUSP3/ASB1/BYSL/TIMM17A/ALDH1B1/MRPS30/PATZ1/TIMM22/CRYZ/DDX10/TOR1AIP1/WDR12/AATF/SMIM7/RRP15/MKKS/TIMM8A/SNRPN/TIMM44/APTX/CRK/RBM34/CREB5/RPS6KC1/FGFR4/EFCAB2/TOMM20/SEH1L/NFS1/DYRK3/MIEF1/POLR1C/MRM3/PTS/PRR3/SCNM1/ODR4/PUS3/MRPL35/WDR3/EHMT2/NOL12/ECD/ITPA/CTPS1/MLH3/GEMIN4/ZNF480/TFB2M/PRPF3/TIMM23/FXR2/UCHL5/BPGM/MRPL46/SCAMP3/ACO2/MORC2/MED20/TMCO1/ZNF226/XPNPEP3/EPRS/…
REACTOME_TRANSCRIPTIONAL_REGULATION_BY_TP53	355	0.318663	1.36971	0.00330797	0.0149056	0.00835267	4415	tags=29%, list=16%, signal=25%	IGFBP3/CDKN1A/TNFRSF10D/TIGAR/PMAIP1/PLK2/GSR/TAF13/TXNRD1/GADD45A/MDM2/TAF7/PML/BNIP3L/AURKA/SCO1/TP53I3/FOS/ELOA/G6PD/BAX/CCNH/CASP1/TAF12/GTF2H2/PLK3/TNFRSF10B/PRDX1/COX20/TRIAP1/ERCC2/SUPT5H/DAXX/TXN/TP53RK/AIFM2/TNFRSF10A/YWHAG/JUN/RRM2B/NOC2L/CYCS/PRMT5/TAF9/PIP4K2A/EHMT2/PRMT1/PRKAG2/COX7A2L/PPP2CB/RABGGTB/HDAC1/TPX2/TAF3/DDIT4/ELOC/HIPK2/FAS/TAF11/GLS/TACO1/PHF20/TTC5/SMYD2/POLR2G/POLR2K/…
DORN_ADENOVIRUS_INFECTION_48HR_DN	40	0.438205	1.36953	0.0829088	0.156799	0.0878657	1760	tags=22%, list=6%, signal=21%	KRT14/PLK2/TXNRD1/CCND1/SDCBP/CD83/IER3/NR4A1/EPHA2
CHYLA_CBFA2T3_TARGETS_UP	328	0.321434	1.36945	0.00356333	0.0156889	0.00879162	4246	tags=30%, list=15%, signal=26%	SERPINA3/C1R/LAPTM5/ALOX5AP/PPBP/TGFBI/SLCO4A1/KCNIP3/F2RL2/HSD11B1/EGLN3/STARD8/TMOD1/PAM/PTPRJ/CEMIP2/SLC16A9/AFAP1L1/ID1/NCF2/CUEDC1/FABP5/FKBP11/ADSSL1/F2R/NRG4/GCHFR/CASP1/UCN/TMEM173/WLS/MAP3K15/GBP3/ARHGEF2/NR1H3/DUSP2/ALAS1/TNFRSF10B/RAB31/PRKCQ/SNX24/SELPLG/TMEM144/ASS1/SLC4A8/IL21R/PLOD3/TNFRSF1A/MEFV/SERPINB2/EVI2B/RAB27A/TMEM38B/SEPT6/MCTP1/ARHGDIB/LRP12/EEPD1/LCP1/ESAM/HIVEP3/ABCD2/C…
REACTOME_CLASS_I_MHC_MEDIATED_ANTIGEN_PROCESSING_PRESENTATION	356	0.318325	1.36828	0.00331236	0.0149056	0.00835267	6102	tags=39%, list=21%, signal=31%	FBXO22/UNKL/UBE2V2/IKBKG/ASB1/UBE2L6/NCF2/TRIM9/SEC22B/B2M/SOCS3/PSMB8/PSMC5/ANAPC13/CYBA/CDC20/BLMH/ASB6/VAMP3/PSME3/HLA-B/ATG7/TAP2/HECW2/UBA7/SOCS1/FBXL5/HLA-A/STUB1/ANAPC7/PSMB10/AC080038.1/SEC61A1/RNF114/PSMA6/UBA5/UBE2Z/GLMN/PSMC4/DTX3L/SPSB2/PSMB9/TRIM21/ERAP2/PSMD10/TLR4/RNF25/ELOC/RNF7/PSME2/PSMA5/KBTBD8/CDC26/UBE2S/FBXO10/PSMD7/SAR1B/KEAP1/PSMD13/PSMB5/UBE2F/FBXL15/CD14/PSMD11/PSME1/UBE…
CREIGHTON_ENDOCRINE_THERAPY_RESISTANCE_4	293	0.324754	1.3682	0.00603942	0.0234526	0.0131421	2747	tags=24%, list=10%, signal=22%	NRXN3/STC1/SERPINA3/MED24/ADGRE5/SLC22A5/PAPSS2/SYBU/PMAIP1/IL27RA/CHN1/SLC25A22/HPCAL1/PRSS23/TNIP1/SLC26A2/BYSL/TSKU/POLR1E/MOCS2/SERPINA5/SRSF7/GNPDA1/DFFA/TP53I3/SLC7A6OS/DLC1/JADE1/EMP3/MAPT/APTX/TBL1X/SMPDL3B/RAB31/ELOVL5/TPBG/PUS1/ASS1/CIART/LYAR/BAG3/SAP30/IRS1/HSPA4/SPART/AC080038.1/PRMT5/RFXANK/TMEM167A/EHMT2/P4HA2/SIGMAR1/PNMA1/RAP2C/LSM6/GREB1/CA12/GATD3A/HMGN3/SYTL4/LYRM4/RUVBL2/CYB5…
ENGELMANN_CANCER_PROGENITORS_UP	47	0.425849	1.36815	0.0738447	0.143379	0.0803453	2200	tags=26%, list=8%, signal=24%	IGFBP3/BAMBI/SLC2A6/BYSL/RRS1/GEM/GALNT6/ELOVL5/NOCT/BASP1/THBD/TFPI
GARY_CD5_TARGETS_UP	460	0.311512	1.36797	0.00108421	0.00663877	0.00372018	4246	tags=25%, list=15%, signal=22%	CDKN1A/CD99L2/SQSTM1/ALDOC/LHFPL6/TNFSF9/GBE1/SLC7A11/PMAIP1/IFRD1/VLDLR/P4HA1/PSAT1/HPCAL1/ICAM1/FLOT1/INSIG1/SAT1/ENO2/LSP1/SDCBP/BNIP3L/CD83/VEGFA/HIBADH/PPP1R9B/LDLR/CBS/TNFAIP3/GCHFR/PPP1R18/SIPA1/PGK1/NFKB2/PIM2/RELB/PDK1/TBL1X/CCNB1IP1/ABHD6/TOR3A/IL21R/ST6GALNAC4/FAM162A/TM2D1/STAT1/AARS/ZFP36L2/CALM3/FXYD5/SRRT/HELLS/IRF9/SEPT6/MAP1S/CYSTM1/CLEC2B/METRNL/REXO5/DUSP5/AP2A1/TARS/SUCLG2/DDI…
RASHI_RESPONSE_TO_IONIZING_RADIATION_1	38	0.441586	1.36796	0.0795848	0.152016	0.0851854	2238	tags=34%, list=8%, signal=32%	HSD11B1/GADD45A/ATF3/VEGFA/FOS/IER2/TIMM8A/DUSP1/WDR74/JUN/IER3/DNAJC17/CCT3
REACTOME_NICOTINATE_METABOLISM	28	0.471991	1.36792	0.0952058	0.171471	0.0960876	3563	tags=29%, list=13%, signal=25%	NMNAT1/PTGS2/PARP10/NNMT/NAMPT/PARP8/NMNAT2/NAXD
BOYLAN_MULTIPLE_MYELOMA_PCA3_UP	72	0.391127	1.36784	0.0499751	0.10674	0.0598139	3528	tags=29%, list=12%, signal=26%	PLK2/PRSS23/CCND1/ATF3/FABP5/ADSSL1/MTHFD2L/SFMBT2/OBSCN/TRMT61A/ACOT2/JUN/RAB30/TMEM38B/VOPP1/TFPI/ISL1/SERPINB1/SLC47A1/SLC30A1/TSPAN4
KOKKINAKIS_METHIONINE_DEPRIVATION_48HR_UP	125	0.358763	1.36764	0.0287751	0.0723515	0.0405437	1398	tags=20%, list=5%, signal=19%	IGFBP3/DCN/CDKN1A/CXCL8/DPYD/BIRC3/TIMP2/WNT5A/IL1A/GSR/IL1R1/IL1B/GADD45A/GPX3/PNP/PLAU/UMPS/BAX/CASP1/ERCC1/PLAUR/TNFRSF10B/TNFRSF10A/BGN/JUN
BONOME_OVARIAN_CANCER_SURVIVAL_SUBOPTIMAL_DEBULKING	478	0.310045	1.36686	0.00219861	0.0112504	0.0063044	4588	tags=26%, list=16%, signal=22%	IGFBP3/DCN/CBX6/ZEB1/COPS8/COLGALT1/PAPSS2/BAMBI/WNT5A/DKK2/KDELR3/PAM/LIMCH1/ANXA6/RPS6KA2/BYSL/PAX8/GALK1/BNIP3L/KRI1/GOSR2/RRP1/GMIP/ACO1/NR2F1/KCNQ1/DNAJB4/F2R/FARSA/ZCCHC24/SDC2/CCNH/PPAN/APEX2/ANAPC13/SLC35C1/SIPA1/ASB6/DNAJB9/ARHGEF2/TWNK/GNE/TRMT61A/ECE1/SMPDL3B/GAS2L1/CDK5RAP2/TRMT1/ESRRA/TM2D1/FBXL5/TSPAN7/IRS1/ARMC8/DKC1/SPART/CSF1/RECK/SRRT/TYMP/REXO4/EHMT2/IGFBP4/ODF2/TICAM1/FKBP14/A…
REACTOME_C_TYPE_LECTIN_RECEPTORS_CLRS	126	0.358019	1.36597	0.0272848	0.0694604	0.0389236	6549	tags=45%, list=23%, signal=35%	IL1B/MUC1/IKBKG/CASP8/PSMB8/ITPR1/PSMC5/PSME3/NFKB2/RELB/PSMB10/PSMA6/MAP3K7/PSMC4/PSMB9/PSMD10/PSME2/PSMA5/PSMD7/PSMD13/PSMB5/PSMD11/MAP3K14/PSME1/PSMA2/PSMA1/PSMC3/UBE2M/MUC13/LYN/RPS27A/PSMD2/SKP1/UBC/ICAM3/PSMD4/CLEC4A/PSMC2/PSMB6/PSMA7/UBE2V1/PSMD12/PSMD14/PSMB4/UBA52/PSMB3/PSMA3/MUCL1/UBE2N/PSMC6/PSMB7/PSMB1/UBA3/CHUK/PSMB2/PRKACB/RELA
NOUZOVA_TRETINOIN_AND_H4_ACETYLATION	134	0.353784	1.36479	0.0246684	0.0649058	0.0363713	4681	tags=31%, list=16%, signal=26%	MPV17/GOSR2/NOL6/DPH3/THUMPD3/ERCC1/DMAC2/SHCBP1/BLZF1/NECAP1/FLCN/SEC23B/NUDT5/TXNL1/PSMA6/PSMC4/NSRP1/PPP2R3C/PNPT1/OXNAD1/HIST2H2BE/THOC1/SKIV2L/TTI2/FGF13/CWF19L1/NME7/KRR1/ASTE1/SUPV3L1/MUL1/MCTS1/BANF1/ARL14EP/SPAG7/MOV10/CCDC174/AP3B1/LARP7/COPS5/NUDT2
REACTOME_CELL_SURFACE_INTERACTIONS_AT_THE_VASCULAR_WALL	118	0.360638	1.3644	0.0286616	0.0721847	0.0404503	2231	tags=18%, list=8%, signal=16%	PROS1/ITGA5/CD99L2/SDC3/TNFRSF10D/SLC7A11/FN1/SLC16A3/SDC2/GPC1/ITGB3/GRB2/TNFRSF10B/PROCR/SELPLG/TNFRSF10A/TSPAN7/GAS6/ITGB1/THBD/ESAM
MCDOWELL_ACUTE_LUNG_INJURY_DN	38	0.440385	1.36424	0.0821223	0.15589	0.0873561	2060	tags=24%, list=7%, signal=22%	ADGRE5/CHST2/SFTPB/TIMM17A/NRP1/MAPT/ALAS1/APLN/ANTXR1
KAAB_FAILED_HEART_VENTRICLE_DN	42	0.432917	1.36407	0.0808081	0.153681	0.0861185	3600	tags=40%, list=13%, signal=35%	SERPINA3/IFITM2/IFITM3/AMD1/SLC39A14/PQBP1/LDHA/ISG15/IFITM1/PSME2/ATP5MC1/CD14/LPCAT4/SERPINB1/TSC22D1/NQO2/STAT3
TIEN_INTESTINE_PROBIOTICS_24HR_DN	212	0.333849	1.36311	0.0123777	0.039198	0.0219655	2219	tags=19%, list=8%, signal=18%	AKR1C1/SQSTM1/FTL/IFRD1/HKDC1/NQO1/GLRX/AKR1B10/NFIL3/FTH1/TXNRD1/GDF15/SAT1/HSPA8/ARF4/BNIP3L/ATF3/ALDH3B1/VEGFA/FICD/SEL1L3/MTHFD2/GCLM/DNAJB9/ARHGEF2/PRNP/P4HB/HSPA13/ST6GALNAC4/TMED5/AARS/RPL9P7/HERPUD1/SLC35E1/HSPH1/MLPH/THOC2/TSPAN31/DDIT4/TRIB3
GOTZMANN_EPITHELIAL_TO_MESENCHYMAL_TRANSITION_DN	190	0.339198	1.36262	0.014976	0.0452384	0.0253503	3887	tags=29%, list=14%, signal=25%	S100A8/SERPINE2/CDKN1A/DMBT1/IL1R1/EDN2/PTPRM/PAM/ARF4/TM4SF1/DOK1/STIP1/SEC22B/FOS/BAX/SLC22A18/MTHFD2/AMD1/PSMC5/BTC/MAN1A1/IER2/FOSL1/HCCS/ATP6V1E1/TOB1/DDX24/HELLS/ECH1/NOCT/ATP5F1B/CALM2/ARHGDIB/HMBS/HAX1/SELENOP/CCT3/VDAC1/GSS/PA2G4/ENPP1/TFAM/PPARG/ATP6V1A/PSME1/POLR2C/ZFP36L1/AIP/ANXA7/ELP5/TOP2A/STAC/SLC12A1/TLE1/HSD17B10
REACTOME_COPI_MEDIATED_ANTEROGRADE_TRANSPORT	98	0.369917	1.36228	0.0358056	0.0840471	0.0470976	4092	tags=29%, list=14%, signal=25%	TUBAL3/KDELR3/CD59/ARF4/GOSR2/CAPZA1/NSF/COPG1/YKT6/COPB1/DCTN6/DYNLL1/DCTN1/TUBA1C/ACTR10/BET1L/COPG2/DYNC1LI1/NAPB/TMED9/COG6/TUBB3/TUBB4B/TUBB2A/RAB1A/ARFGAP1/TUBA8/TUBB6
JIANG_TIP30_TARGETS_UP	46	0.425284	1.36224	0.0770328	0.148345	0.0831284	1743	tags=24%, list=6%, signal=22%	IGFBP3/CDH2/P4HA1/NFIL3/IFITM2/LAMB1/PPP1R2/DUSP1/IRS1/IER3/C1GALT1
NABA_PROTEOGLYCANS	27	0.472321	1.36183	0.0981403	0.174903	0.0980109	1339	tags=19%, list=5%, signal=18%	DCN/SRGN/ESM1/OMD/BGN
WATANABE_COLON_CANCER_MSI_VS_MSS_UP	26	0.47767	1.36095	0.0993066	0.175977	0.0986124	4541	tags=46%, list=16%, signal=39%	IFI6/MYRF/NCF2/DUSP4/MT1E/HNRNPL/PDE10A/EIF5A/GAD1/USF1/ETV5/SRSF6
LIU_LIVER_CANCER	33	0.452162	1.36085	0.0865672	0.161129	0.0902919	2182	tags=24%, list=8%, signal=22%	SERPINA1/MMP19/DOK1/AIMP2/ECH1/DDX31/ZYX/GEMIN2
ZHAN_MULTIPLE_MYELOMA_PR_UP	43	0.429068	1.36055	0.0827262	0.156568	0.0877365	4401	tags=37%, list=15%, signal=32%	AURKA/TSR1/SLC19A1/KPNA2/TYMS/TPX2/PRC1/DSCC1/CDK1/TOP2A/PRR11/UBE2T/PCLAF/CCNB1/UBE2C/BIRC5
BILBAN_B_CLL_LPL_DN	41	0.4332	1.36029	0.0850816	0.159041	0.0891219	2526	tags=29%, list=9%, signal=27%	PMAIP1/GLRX/SAT1/SRSF7/FOS/HIST1H2BG/PRNP/DUSP1/IER3/RGS2/EIF4A1/MARCKS
STAMBOLSKY_RESPONSE_TO_VITAMIN_D3_UP	80	0.381886	1.35893	0.0431034	0.0963043	0.0539662	1216	tags=19%, list=4%, signal=18%	PDE3B/CA9/STC1/AREG/SGPP2/IFIT1/SLC26A2/LIG4/PDE4B/G6PD/SOCS3/WLS/TRIB2/RBMS1/EVA1C
NABA_ECM_GLYCOPROTEINS	172	0.341553	1.35836	0.017406	0.0501729	0.0281154	2972	tags=24%, list=10%, signal=21%	IGFBP3/LRG1/FBN1/MFGE8/CCN3/TGFBI/DMBT1/PCOLCE2/MFAP5/TNFAIP6/FN1/SVEP1/TNC/FBLN5/LTBP1/TSKU/SRPX/LAMB1/NPNT/ANOS1/RSPO2/FGL1/CCN5/NDNF/MATN1/ABI3BP/FBN2/SSPO/NTNG1/INTS6L/IGFBP4/GAS6/VWCE/EGFLAM/EFEMP1/CCN2/PXDN/LAMC1/AGRN/VWDE/THSD4
WIERENGA_STAT5A_TARGETS_GROUP2	49	0.418681	1.35789	0.0714115	0.140077	0.078495	1608	tags=18%, list=6%, signal=17%	SQSTM1/IL7R/CXCL8/PSAT1/NFIL3/CD83/PLAU/CKAP4/ANTXR2
SEIDEN_ONCOGENESIS_BY_MET	88	0.37464	1.35774	0.0428353	0.0959261	0.0537543	2928	tags=32%, list=10%, signal=29%	PLOD2/UGDH/P4HA1/TCERG1/CCT6A/LAMB1/CAPZA1/RTCA/SH3BGRL/TMX1/STAT1/SELENOF/HSPA4/SERBP1/IFITM1/SMN1/EIF5/MMADHC/TAF1D/CLIC4/MSMO1/SUB1/HSP90AA1/ADAM9/GLS/SRP72/HNRNPH2/CD46
PEART_HDAC_PROLIFERATION_CLUSTER_UP	53	0.411783	1.35758	0.0679751	0.134892	0.0755898	1963	tags=26%, list=7%, signal=25%	QSOX1/INSIG1/MLX/TPD52L2/KPNA2/PRDX1/DUSP1/BLZF1/TOB1/CDC37/CKS2/RECK/DCTN1/KLF10
DAIRKEE_CANCER_PRONE_RESPONSE_BPA_E2	111	0.361612	1.35689	0.0352423	0.0828713	0.0464387	4416	tags=34%, list=16%, signal=29%	IFRD1/S100A4/GAPDH/EIF2S1/NPNT/NOP16/EIF3A/ITPKA/EIF4E/TXN/SEC61A1/SRSF3/PSMA6/TCP1/CTPS1/DDC/PARM1/EIF4A1/VBP1/ATF4/PRDX6/EEF1D/EBNA1BP2/EPRS/USP2/POLR2C/CAVIN2/DDX39A/SUPT16H/SFPQ/PPP2CA/NDUFS3/POLD2/POLR2H/EIF4G1/ATP5MC3/ANP32B/DCLK1
ZHAN_V2_LATE_DIFFERENTIATION_GENES	45	0.424882	1.35609	0.0799336	0.152403	0.0854023	3467	tags=31%, list=12%, signal=27%	AKR1B1/SRSF7/HIST1H2BG/DDX10/SLC39A14/PKM/DCTN6/TALDO1/PEX5/H2AFX/NCSTN/WTAP/FPGS/RGS16
KEGG_APOPTOSIS	79	0.381654	1.35573	0.047041	0.102169	0.0572524	3617	tags=32%, list=13%, signal=28%	TNFRSF10D/BIRC3/IL1A/IL1R1/IL1B/IKBKG/CASP8/DFFA/BAX/TNFRSF10B/BCL2L1/TNFRSF10A/CYCS/TNFRSF1A/PRKAR1B/FADD/RIPK1/CASP7/FAS/MAP3K14/IRAK2/BID/CASP10/TRAF2/ENDOG
FURUKAWA_DUSP6_TARGETS_PCI35_DN	69	0.39032	1.35537	0.0579961	0.119668	0.0670586	4550	tags=35%, list=16%, signal=29%	HPCAL1/AURKA/KHDRBS3/RIOK1/SLCO2A1/PHLDA2/SHCBP1/PRMT5/PBK/WDR3/EPHA2/ADORA2B/TPX2/PRC1/KIF2C/ACOX2/PDSS1/EBNA1BP2/KIF20B/LAT2/ORC6/CCNB1/SIPA1L3/WDR5
REACTOME_SIGNALING_BY_ROBO_RECEPTORS	210	0.332548	1.35481	0.0136035	0.0418779	0.0234672	7823	tags=56%, list=27%, signal=41%	RPS27L/PSMB8/GPC1/PSMC5/NCBP2/UPF2/NRP1/PSME3/PSMB10/UPF3A/PSMA6/PSMC4/PSMB9/PSMD10/ELOC/PSME2/PSMA5/ISL1/PSMD7/RBM8A/PSMD13/PSMB5/NCK1/PSMD11/MAGOHB/UPF3B/PSME1/AKAP5/NTN1/PSMA2/PSMA1/RPS12/PSMC3/ROBO1/EIF4A3/RPL9/ETF1/RPS27A/PSMD2/RPS10/RPS20/CXCR4/UBC/EIF4G1/PSMD4/CAP2/RBX1/PSMC2/RPL24/RPL35A/RPLP1/PSMB6/RPL17/PSMA7/RPL8/RPS26/PSMD12/PSMD14/RPS3/PSMB4/RPL13A/FAU/UBA52/RPS3A/PSMB3/RAC1/PSMA3/RP…
SANSOM_APC_MYC_TARGETS	232	0.328927	1.35481	0.0104415	0.034393	0.0192728	4370	tags=32%, list=15%, signal=27%	COLGALT1/TFRC/TRMT6/TAF7/IKBKG/DCUN1D3/CCND1/METTL1/LARGE2/VARS/FHOD1/BDNF/WDR62/NOL8/JADE1/RRP9/PABPC4/SART3/SLC35B2/NFKB2/PLK3/NOL9/GEMIN5/BCL2L1/IER5/TP53RK/YWHAG/AKT1S1/DKC1/SEC61A1/WDR4/MYBBP1A/ALKBH2/SLC6A6/HIRA/CCT4/SIGMAR1/PSMB9/ATIC/DPH2/BCAS3/C20orf27/ZBTB48/NME1/POFUT1/KPTN/HSP90AB1/TNFRSF12A/QTRT1/TXLNA/WRB/UBE2K/TELO2/ADO/TXN2/PPP1R15B/FZD5/NTMT1/HOMER1/OGFR/SFSWAP/SRSF2/TTC27/ABHD14…
ALTEMEIER_RESPONSE_TO_LPS_WITH_MECHANICAL_VENTILATION	106	0.363648	1.3545	0.0365285	0.085261	0.0477778	2730	tags=26%, list=10%, signal=24%	SAA1/TNFSF9/SOD2/IL1A/IL1B/NFIL3/ATF3/CCL20/IFIT2/F3/TNFAIP3/SOCS3/GEM/GBP3/IL1R2/RELB/PLAUR/PFKFB3/STAT1/SAP30/MEFV/ISG15/CTPS1/OSMR/ADAMTS4/BCL3/SLFN12/CD14
PID_CERAMIDE_PATHWAY	43	0.426882	1.35361	0.0864865	0.161101	0.0902761	6769	tags=51%, list=24%, signal=39%	BIRC3/CASP8/BAX/EGF/CYCS/TNFRSF1A/MAP4K4/FADD/RIPK1/SPHK2/MAP2K2/BID/TRAF2/TRADD/CRADD/BCL2/AIFM1/MAP2K1/CTSD/KSR1/RELA/NFKBIA
CHIBA_RESPONSE_TO_TSA_UP	49	0.417328	1.3535	0.073561	0.143009	0.0801384	3089	tags=35%, list=11%, signal=31%	KRT14/MMP19/TIMP2/GLRX/QSOX1/TRIP6/FOS/CDKN2C/BMP6/FOSB/FBN2/HLA-A/ARHGDIB/VEGFC/CCN2/HBEGF/KRT7
BOHN_PRIMARY_IMMUNODEFICIENCY_SYNDROM_UP	46	0.422542	1.35345	0.0796481	0.152042	0.0852	3544	tags=37%, list=12%, signal=32%	FERMT2/IL32/TMOD1/ATF5/NMD3/CALU/NLRP1/SELPLG/TXN/MLEC/SRSF3/DENND2D/HAX1/P2RX5/ATF4/SSR2/TOP2A
REACTOME_SIALIC_ACID_METABOLISM	30	0.458553	1.35269	0.0997054	0.176358	0.0988258	3189	tags=43%, list=11%, signal=39%	ST3GAL3/ST3GAL2/CTSA/SLC17A5/GNE/ST6GALNAC4/NEU1/ST8SIA1/CMAS/NEU3/ST3GAL5/ST6GALNAC3/ST6GALNAC1
BARRIER_CANCER_RELAPSE_NORMAL_SAMPLE_DN	31	0.456331	1.35254	0.0975832	0.174215	0.0976252	5770	tags=55%, list=20%, signal=44%	SPG7/SUPT5H/JUN/HSPA1A/FAAP100/RHOT2/BCR/ZFP36L1/NSMF/TLE6/STK25/TCIRG1/CNPY3/GNB1L/LAMP1/PPP1R15A/VPS37C
PID_FRA_PATHWAY	37	0.438754	1.35224	0.0880662	0.163521	0.0916325	1398	tags=24%, list=5%, signal=23%	DCN/HMOX1/CXCL8/CCND1/PLAU/LIF/FOSL1/PLAUR/JUN
LIU_BREAST_CANCER	25	0.479714	1.3515	0.108444	0.186847	0.104704	8162	tags=56%, list=29%, signal=40%	ERCC2/CTSB/ANP32E/MLPH/ITGB1/TUBB6/EIF1/FAU/DHX16/PCYT1A/FNDC5/PTMA/ZNF470/KPNB1
REACTOME_RESOLUTION_OF_ABASIC_SITES_AP_SITES	38	0.43623	1.35137	0.0901961	0.165567	0.092779	4780	tags=37%, list=17%, signal=31%	NEIL2/TDG/POLE3/PARP2/OGG1/FEN1/POLB/MBD4/POLE4/RFC3/NTHL1/POLD2/APEX1/POLD1
REACTOME_PROGRAMMED_CELL_DEATH	174	0.339304	1.35109	0.0185654	0.0524	0.0293635	5232	tags=43%, list=18%, signal=35%	VIM/BIRC3/PMAIP1/MLKL/UNC5A/CASP8/DFFA/PSMB8/BAX/PSMC5/PSME3/MAGED1/MAPT/TNFRSF10B/TICAM2/BCL2L1/PRKCQ/TNFRSF10A/YWHAG/CLSPN/CYCS/PSMB10/HIST1H1C/DYNLL1/DIABLO/SEPT4/PSMA6/TICAM1/PSMC4/PSMB9/PSMD10/TLR4/FADD/RIPK1/PSME2/DAPK3/PSMA5/CASP7/FAS/LMNB1/PSMD7/AVEN/PSMD13/PSMB5/CD14/PSMD11/BAK1/PSME1/PSMA2/PSMA1/PSMC3/BID/TRAF2/STAT3/RPS27A/PSMD2/YWHAB/UBC/PSMD4/TRADD/NMT1/PSMC2/PSMB6/XIAP/PSMA7/SFN/PSM…
SANSOM_APC_TARGETS_DN	310	0.318556	1.35018	0.00547328	0.0217729	0.0122009	2804	tags=19%, list=10%, signal=17%	ABCC2/SRGN/NPR3/LAPTM5/GGT5/PAPSS2/CHST2/TGFBI/SRXN1/SLC22A4/AKR1B10/EDN2/ANXA6/CYP27B1/ABCC3/LSP1/PAX8/PEPD/RUNX2/FMNL1/GNPDA1/RMDN3/SLC22A18/NKIRAS1/GDI1/CASP1/SIPA1/STK10/DNAJB9/SOX18/NR1H3/SELPLG/ATP6V0B/TOB1/OGDH/SEPT4/RFXANK/ACOT13/ZNF467/ADORA2B/MCFD2/DDC/ARHGDIB/MLPH/RGS2/BASP1/NR1I3/CYB5A/PAFAH2/FAS/IKBKE/SAR1B/KEAP1/CD7/CNTNAP1/SPHK2/LIPA/RHOC
REACTOME_TRANSCRIPTIONAL_REGULATION_OF_GRANULOPOIESIS	79	0.380022	1.34993	0.0505817	0.107636	0.0603159	3755	tags=23%, list=13%, signal=20%	CDKN1A/HIST1H2AC/PML/HIST1H2BK/HIST2H2AA4/HIST1H3G/HIST1H2BG/HIST1H2BD/HIST2H4A/HIST1H2BN/HIST2H2BE/HIST1H3H/H2AFX/HIST1H2BJ/H2AFZ/STAT3/RARA/CEBPB
ROSS_AML_WITH_CBFB_MYH11_FUSION	45	0.422945	1.34991	0.0837287	0.157959	0.0885158	962	tags=16%, list=3%, signal=15%	S100A8/S100A9/TGFBI/HPCAL1/PTPRM/NRP1/PGM1
REACTOME_ATTENUATION_PHASE	26	0.4736	1.34935	0.104898	0.18238	0.1022	2942	tags=38%, list=10%, signal=35%	SERPINH1/HSPA8/PTGES3/HSPA1A/HSPH1/MRPL18/HSPA6/HSP90AA1/TNFRSF21/HSP90AB1
BYSTRYKH_HEMATOPOIESIS_STEM_CELL_QTL_CIS	118	0.356554	1.34895	0.0331317	0.0792056	0.0443845	5477	tags=37%, list=19%, signal=30%	PON2/FLOT1/CD59/CBR1/ELOA/F2R/CRYZ/ALDH9A1/RCN1/GEMIN5/ADPGK/TRAPPC12/ST6GALNAC4/HARS/DCTN6/NABP1/AC055839.2/MRPL35/CUX1/DAP3/ARL6IP1/TFPI/GGNBP2/TMCO1/GFER/CNN3/SNRPB2/NOP10/SERF2/TBCB/TUBB6/PSMG4/MRPS7/PSMB6/THUMPD1/PADI4/KIF1C/DPP7/NECAP2/MTIF2/ATP5MPL/TM2D3/SRP9/COA3
CHAUHAN_RESPONSE_TO_METHOXYESTRADIOL_DN	102	0.36414	1.34894	0.0405161	0.0920411	0.0515772	5463	tags=41%, list=19%, signal=33%	VIM/HCLS1/ENO2/LSP1/XBP1/B2M/TNFAIP3/PGK1/PIM2/TMSB4X/PKM/HERPUD1/ZFP36L2/ARHGDIB/NRDC/ARL6IP1/UBE2S/MARCKS/PHB2/GNAS/HSP90AB1/NCSTN/NME4/H2AFZ/ATP5PO/TUBB2A/SEC61G/TLN1/SPCS2/YWHAB/FDPS/UBC/MDH1/EIF3M/CTBP1/MCL1/ERP29/ARPC5/TUBBP1/GGT1/NAP1L1/ADM
REACTOME_SUMOYLATION_OF_UBIQUITINYLATION_PROTEINS	39	0.433645	1.3489	0.0896074	0.164981	0.0924507	3698	tags=23%, list=13%, signal=20%	MDM2/PML/TRIM27/SEH1L/NUP54/NUP62/NUP35/NUP43/NUP93
RHODES_UNDIFFERENTIATED_CANCER	68	0.389544	1.34814	0.0633005	0.128023	0.0717407	6048	tags=54%, list=21%, signal=43%	CCT6A/MTHFD2/GCLM/CDC20/KPNA2/CKS2/GAS6/IFI30/ADRM1/UBE2S/KIF2C/NME1/H2AFX/POLR2K/GARS/EIF2S2/SSBP1/CDK1/H2AFZ/TOP2A/CKS1B/PSMD2/TUBB/PCLAF/TAP1/CCNB1/SLC16A1/UBE2C/BIRC5/PSMD14/SEC61B/MAD2L1/CTSL/YBX1/EZH2/PSMB7/ILF2
KAAB_HEART_ATRIUM_VS_VENTRICLE_UP	241	0.326315	1.34761	0.0118649	0.0378194	0.0211929	2115	tags=20%, list=7%, signal=18%	CFH/VIM/AKR1C1/SLC39A8/C1R/BAMBI/IL1R1/PRSS23/QSOX1/ME1/PAM/MAP1B/PML/TAGLN/ACTA2/STAT4/SAT1/DAP/ENO2/GPX3/PDE4B/IL1RL1/NR2F1/TRIP6/FAM155B/SLC22A18/NSF/CCDC85B/MAGED1/PRAF2/GRB2/CYB561D2/CCN5/PRDX1/DESI1/TSPAN7/PLOD3/ZFP36L2/KCNK3/SERPINB8/EXOSC2/PLA2G2A/DHODH/GRN/PARM1/BASP1/MR1
REACTOME_TRANSPORT_OF_MATURE_MRNAS_DERIVED_FROM_INTRONLESS_TRANSCRIPTS	43	0.424887	1.34729	0.0900118	0.165328	0.0926449	3698	tags=26%, list=13%, signal=22%	NCBP2/EIF4E/SEH1L/FIP1L1/NUP54/NUP62/SYMPK/NUP35/NUP43/ALYREF/NUP93
REACTOME_DISEASES_OF_CARBOHYDRATE_METABOLISM	31	0.454367	1.34672	0.101687	0.179131	0.10038	6315	tags=55%, list=22%, signal=43%	GBE1/GALNS/RPIA/TALDO1/GAA/GNS/GYS1/ARSB/RPS27A/UBC/IDUA/UBA52/DCXR/NAGLU/HYAL1/GLB1/SGSH
FLECHNER_PBL_KIDNEY_TRANSPLANT_OK_VS_DONOR_DN	42	0.427137	1.34585	0.0920836	0.167924	0.0940996	5271	tags=38%, list=19%, signal=31%	IL1B/IMPA1/PAX8/MIR22HG/ANP32E/HAUS2/ANXA5/EID1/LYN/GADD45B/UBE2E3/PTPN12/TRAF3IP2/SLC2A3/CD53/ATP6V1G1
WHITEFORD_PEDIATRIC_CANCER_MARKERS	113	0.357653	1.34585	0.0348052	0.0821789	0.0460507	4785	tags=34%, list=17%, signal=28%	PSAT1/ADGRL3/TWIST1/GAPDH/AURKA/RRP1/ZWINT/KPNA2/TYMS/ENO1/CDCA2/CKS2/PBK/PON3/TPX2/MLLT11/EIF4A1/PRC1/SMC4/NME1/ODC1/H2AFX/CDK1/RFC3/TOP2A/CKS1B/TMEFF1/UBE2T/NASP/CCNB1/CENPN/JPT1/UBE2C/BIRC5/HMGB3/DTYMK/RNASEH2A/CDCA8
EPPERT_PROGENITOR	134	0.348872	1.34584	0.031565	0.0772736	0.0433019	4820	tags=34%, list=17%, signal=29%	BAMBI/TFRC/CNRIP1/TXNRD1/ZWINT/ACO1/DLC1/UMPS/EIF2S1/MTHFD2/SART3/CALU/SORD/BMS1/ARMC8/TMEM97/MRPL35/ASRGL1/CTPS1/HIRA/FKBP14/MINPP1/TRIT1/DDAH1/PEX5/TIPIN/HSP90AA1/PAICS/EIF5B/ODC1/HBS1L/LANCL2/P2RY1/METAP2/RFC3/SUPT16H/AKAP2/CHEK2/C5orf30/PCLAF/BTK/PRKDC/PMP22/LDHB/MTREX/NDC80
GENTILE_UV_LOW_DOSE_DN	62	0.395383	1.34573	0.0685131	0.135696	0.0760401	4648	tags=37%, list=16%, signal=31%	CDH2/GBE1/PTPRM/G6PD/DDX10/RBMS1/TPST1/HMGA2/TBC1D30/PODXL/DDIT4/VEGFC/LAS1L/NAV3/ZNF804A/DOCK1/C2CD2/COL13A1/PEX14/SATB2/AP3B1/CRADD/MEIS2
NGUYEN_NOTCH1_TARGETS_DN	81	0.376791	1.3452	0.0500885	0.10674	0.0598139	2526	tags=31%, list=9%, signal=28%	PCDH7/IL1R1/HPCAL1/SERPINH1/MGAT2/XBP1/F3/PTGS2/MTHFD2/NOP2/STC2/PPIF/PDE6A/ASS1/DAXX/HERPUD1/PNN/TNFSF4/PSMB9/TARS/KLF10/RGS2/BASP1/ADSL/MARCKS
REACTOME_ORGANELLE_BIOGENESIS_AND_MAINTENANCE	288	0.319884	1.3447	0.0100978	0.0335134	0.0187799	4389	tags=30%, list=15%, signal=26%	SOD2/TUBAL3/MAPRE1/ARF4/CEP164/PPRC1/SAMM50/DNAJC11/MKKS/POLG2/TWNK/FGFR1OP/SCLT1/ALAS1/TBL1X/CC2D2A/CCT2/PDE6D/CDK5RAP2/NR1D1/B9D2/CHCHD3/ESRRA/YWHAG/GABPB1/CYCS/ATP5PD/CCT5/DYNLL1/MAPK12/DCTN1/TUBA1C/TCP1/ATP5F1B/TCTN3/ODF2/ARL13B/CCT4/PRKAG2/HAUS2/IFT46/ATP5F1E/MTX2/ATP5MC2/CCT3/TFB2M/CCT8/CEP41/CSNK1D/HSP90AA1/POLRMT/ATP5MC1/CEP290/DYNC2H1/TGS1/CEP83/TFAM/WDR60/HELZ2/CEP192/SSBP1/MTX1/TUBB3/P…
REACTOME_OXIDATIVE_STRESS_INDUCED_SENESCENCE	113	0.357155	1.34398	0.0361039	0.0844632	0.0473308	4351	tags=25%, list=15%, signal=21%	CBX6/HIST1H2AC/MDM2/HIST1H2BK/E2F3/HIST2H2AA4/HIST1H3G/FOS/HIST1H2BG/HIST1H2BD/HIST2H4A/CDKN2C/TXN/JUN/EED/MAP4K4/HIST1H2BN/HIST2H2BE/PHC2/HIST1H3H/H2AFX/HIST1H2BJ/H2AFZ/RPS27A/MOV10/UBC/HIST1H2BC/RING1
EHLERS_ANEUPLOIDY_UP	40	0.429895	1.34356	0.0926355	0.168428	0.0943823	3732	tags=30%, list=13%, signal=26%	ALOX5AP/FERMT2/RPF2/EXTL2/MRPS25/SPART/RWDD2B/PNMA1/RABGGTB/RHOC/RPL9/CWC27
ZHONG_RESPONSE_TO_AZACITIDINE_AND_TSA_UP	171	0.338202	1.34337	0.0229885	0.0616519	0.034548	3787	tags=29%, list=13%, signal=26%	CDKN1A/MAFB/TIMP2/FERMT2/HCLS1/KDELR3/HABP4/ENO2/ARF4/CLIC3/ATF3/GOSR2/PGF/HIST1H2BG/PLIN3/ITPR1/NOP14-AS1/HIST1H2BD/STK10/ASB6/PLK3/RBM34/YKT6/TEF/MLEC/MICA/NEU1/JUN/HIST1H1C/MOK/PISD/ATP6V1D/APOBEC3B/IFI30/SPHK1/CYP26A1/MOSPD1/MAP1LC3B/GLS/ODC1/SPANXA1/MAP3K14/CDR2L/EHD1/TKTL1/AAMDC/TYRO3/STAT3/TUBB2A/LAT2
WHITFIELD_CELL_CYCLE_G2	165	0.340284	1.34333	0.0243561	0.0641944	0.0359727	5143	tags=32%, list=18%, signal=26%	MUC1/LIX1L/NEIL3/MGAT2/TMEM132A/RDH11/WDR62/PPP1R2/RIDA/KIF5B/CDKN2C/KPNA2/MEPCE/GABPB1/STAT1/CDCA2/SAP30/BUB3/NNMT/CFD/TTC38/FADD/HIPK2/PCED1A/LMNB1/TRMT2A/ZNHIT2/SMC4/STK17B/H2AFX/PKNOX1/NMB/MALAT1/CDK1/TUBB4B/AP3D1/TOP2A/KIF20B/TUBB2A/CHEK2/AC092338.1/TUBB/CBX5/CIP2A/EBI3/JPT1/UBE2C/CDCA8/NDC80/HAUS8/TEDC1/CDKL5/SKA3
WAMUNYOKOLI_OVARIAN_CANCER_LMP_DN	188	0.334342	1.34322	0.0191226	0.0534385	0.0299454	3212	tags=22%, list=11%, signal=19%	DCN/COL8A1/C1S/PROS1/UGP2/CCDC80/DPYD/SOD2/FERMT2/WNT5A/LIX1L/PDGFC/RGL1/EXTL2/NR2F1/OSTM1/SDC2/ZNF330/NLRP1/TMEM45A/RBMS1/PRNP/PROCR/PRPS1/CALM2/HTRA1/CERK/BASP1/ATP2B1/ADH5/DCBLD2/GPRASP2/PTGS1/EFEMP1/ZNF512/FGF13/HSP90AB1/WRB/ATP11C/PREPL/SPOCK2
MORI_MATURE_B_LYMPHOCYTE_DN	70	0.385773	1.34309	0.0618659	0.12562	0.070394	4165	tags=31%, list=15%, signal=27%	IL7R/PTGR1/GPAM/MTHFD2/NCBP2/TXN/DESI1/CCND3/ZBED3/PRPS1/RGS2/LMNB1/MARCKS/SMARCA4/KIF2C/H2AFZ/CKS1B/SNRPC/LRMP/CCNB1/COX7A2/SLC16A1
LEE_AGING_MUSCLE_DN	35	0.441125	1.34283	0.096242	0.172626	0.0967349	6507	tags=49%, list=23%, signal=38%	NR2F1/PSMB8/PPP1R2/LONP1/CALM3/PEX2/ADAM28/GFER/PSMC3/IL6ST/PRKCSH/EEF1G/PMP22/CDK11B/PPP3CC/USP50/TNFRSF4
REACTOME_MITOTIC_PROPHASE	133	0.34845	1.34273	0.0327956	0.0787205	0.0441127	4252	tags=23%, list=15%, signal=20%	HIST1H2AC/HIST1H2BK/HIST2H2AA4/HIST1H3G/HIST1H2BG/HIST1H2BD/HIST2H4A/SEH1L/BLZF1/PPP2CB/NUP54/HIST1H2BN/NUP62/HIST2H2BE/LMNB1/NEK6/SMC4/HIST1H3H/H2AFX/NUP35/NUP43/HIST1H2BJ/CDK1/H2AFZ/BANF1/NUP93/RAB1A/PPP2CA/CCNB1/SET/HIST1H2BC
REACTOME_RUNX1_REGULATES_GENES_INVOLVED_IN_MEGAKARYOCYTE_DIFFERENTIATION_AND_PLATELET_FUNCTION	86	0.372011	1.34266	0.0487681	0.104576	0.0586016	4550	tags=27%, list=16%, signal=23%	HIST1H2AC/HIST1H2BK/HIST2H2AA4/HIST1H3G/HIST1H2BG/HIST1H2BD/HIST2H4A/PRKCQ/PRMT1/HDAC1/HIST1H2BN/HIST2H2BE/HIST1H3H/MYL9/H2AFX/PRMT6/HIST1H2BJ/NR4A3/H2AFZ/KAT2B/MOV10/HIST1H2BC/WDR5
REACTOME_COOPERATION_OF_PDCL_PHLP1_AND_TRIC_CCT_IN_G_PROTEIN_BETA_FOLDING	40	0.429464	1.34221	0.0930987	0.169069	0.0947417	3339	tags=30%, list=12%, signal=27%	CCT6A/GNG11/CCT2/CCT5/TCP1/GNG2/CCT4/CCT3/CCT8/CCT7/GNG7/GNG3
GILDEA_METASTASIS	29	0.458784	1.34217	0.106205	0.183993	0.103105	2802	tags=45%, list=10%, signal=40%	SRGN/AKR1C3/GBP1/FN1/TAGLN/DUSP4/PTX3/IFI27/IGFBP4/ARHGDIB/BST2/SMARCA4/MYL9
BROWNE_HCMV_INFECTION_10HR_DN	55	0.403847	1.34204	0.0750361	0.145415	0.0814865	2182	tags=29%, list=8%, signal=27%	PTGFR/EEF1AKNMT/B2M/RDH11/BDNF/RBMS1/SON/AIMP2/IRS1/ETV1/OGG1/ANP32A/PNN/ADORA2B/HOXA11/GEMIN2
NUTT_GBM_VS_AO_GLIOMA_UP	45	0.42033	1.34156	0.0889469	0.164358	0.0921017	2864	tags=29%, list=10%, signal=26%	VIM/LAPTM5/BTN3A2/TMX1/STAT1/SMOX/LDHA/TMEM109/FLNA/CLIC4/RHOC/MSN/TMED9
REACTOME_O_LINKED_GLYCOSYLATION	100	0.36351	1.3414	0.0436242	0.0969006	0.0543003	3615	tags=26%, list=13%, signal=23%	ADAMTS12/MUC1/B3GNTL1/ST3GAL3/ST3GAL2/ADAMTS9/LARGE2/GALNT6/ADAMTS1/ADAMTSL4/GALNT14/ST6GALNAC4/GALNT15/SSPO/C1GALT1/B3GNT2/ADAMTS3/ADAMTS4/B4GALT6/THSD4/ST6GALNAC3/ADAMTS13/GALNT18/POFUT2/ADAMTS15/MUC13
AGUIRRE_PANCREATIC_CANCER_COPY_NUMBER_DN	228	0.326147	1.34083	0.0138276	0.0423124	0.0237107	4368	tags=33%, list=15%, signal=28%	VLDLR/GSR/APOL2/KDELR3/ZPR1/APOL3/GOSR2/PATZ1/ASF1A/PDCD1LG2/SRRM1/FKBP11/UBXN8/AMD1/TAF12/PPP5C/PUM3/QRSL1/CCT2/ISOC1/MAK16/SNAPC3/MIEF1/DCTN6/APOL6/TMBIM4/SPATS2/PISD/GTF2E2/TOM1/RAP1B/PPP2CB/SUMO3/KANSL2/ATP2B1/YTHDF2/AK2/C6orf120/NAT1/LYPLA2/CLIC4/PHC2/GCAT/CEP290/HMGCL/TTI2/EIF3D/ATF4/HBS1L/C12orf29/MECR/DDX23/PDSS2/PFDN5/NKAIN1/GALE/CCDC59/ZNF593/TXN2/BCR/AMDHD2/UFSP2/RANBP6/GNS/CHEK2/CD63/…
DURAND_STROMA_NS_UP	159	0.341125	1.34033	0.0266593	0.0682085	0.0382221	2086	tags=22%, list=7%, signal=21%	DCN/ATOH8/PDE3B/TNFSF9/SNAI1/GDF15/FBLIM1/RNF128/S1PR3/SH3RF3/EZR/PCDH9/SLC16A3/MFSD2A/F2R/ITPR1/MAN1A1/RAB6B/ACSBG1/NIPSNAP1/TMEM45A/ABHD6/CREB5/SLC4A8/SPRY4/ZNF503/REXO4/SLC35G1/MRPL35/TMEM109/PRKAG2/SLC25A33/PARM1/CA12/HHAT
CAFFAREL_RESPONSE_TO_THC_UP	31	0.452003	1.33971	0.106247	0.183993	0.103105	3303	tags=23%, list=12%, signal=20%	HIST1H2AC/TFRC/IMPA1/VEGFA/HERPUD1/ZRANB2/ZFP36L1
KYNG_DNA_DAMAGE_BY_4NQO	33	0.445053	1.33946	0.0996556	0.176358	0.0988258	4331	tags=39%, list=15%, signal=33%	PDGFRL/WNT5A/ID1/SSR3/ADAMTS1/MOK/RABGGTB/CYB5A/RHOBTB3/ANKRD11/IFNGR2/ATOX1/POLR2F
REACTOME_METALLOPROTEASE_DUBS	35	0.439933	1.3392	0.0973877	0.174069	0.0975434	5083	tags=31%, list=18%, signal=26%	HIST1H2AC/HIST2H2AA4/STAMBPL1/BABAM2/NLRP3/KAT2B/BABAM1/RPS27A/UBC/PSMD14/UBA52
SENGUPTA_NASOPHARYNGEAL_CARCINOMA_DN	319	0.314761	1.33836	0.00646412	0.0248183	0.0139075	1289	tags=12%, list=5%, signal=12%	CFB/DNER/KRT14/DAW1/PDZK1IP1/S100A9/SAA1/LRG1/AKR1C3/PTGR1/SYBU/NQO1/SLC22A4/MUC1/PRSS23/CES1/CAPN5/CXCL1/EZR/CLIC3/ALDH3B1/TACC2/GIHCG/SELENBP1/ADSSL1/CFAP45/NBEA/RHOV/GCLM/TOGARAM2/BACE2/CC2D2A/PRDX1/RASSF1/MGLL/EFCAB2/EVA1C/ASS1/LTF
KAYO_CALORIE_RESTRICTION_MUSCLE_DN	79	0.376739	1.33827	0.052352	0.110557	0.0619531	4679	tags=30%, list=16%, signal=25%	ABCC2/VLDLR/RUNX2/RRS1/VDAC2/BMP6/TSPAN7/SMOX/ECH1/ATP5F1B/CREM/SNRNP27/CYC1/COMMD1/PCDHGB7/BAK1/MPI/CDR2L/DDO/POLR2I/NOS2/MDH1/CGREF1/RANBP1
GERHOLD_ADIPOGENESIS_DN	58	0.398906	1.33753	0.0732182	0.142524	0.0798664	2667	tags=31%, list=9%, signal=28%	AKR1B1/IFRD1/IL1R1/FN1/CCND1/CASP8/BAX/CCT2/CDC37/CCT5/IER3/UBTF/GAS6/ITGB1/THBD/ANXA5/PLAT/CCN2
BOCHKIS_FOXA2_TARGETS	386	0.309153	1.33748	0.00303541	0.0140994	0.0079009	3293	tags=21%, list=12%, signal=19%	PLOD2/SERPINA1/CDH2/PROS1/SAA1/LRG1/SERPINA3/C1R/FTL/CFI/PON2/F2RL2/BNIP3/QSOX1/CES1/INSIG1/SLC25A25/GPAM/UBE2L6/MAFG/CLN8/SLC25A42/LDLR/VARS/DCAF13/AACS/ITPR1/COPG1/MKKS/PLRG1/CEBPZ/SORD/ATG12/OMD/PDE6D/PRDX1/CLP1/SON/CHAC2/PSMB10/TNFRSF1A/TRIM13/FAH/PRMT5/ISG15/IGFBP4/C1RL/PFDN2/HM13/TARS/TIAL1/MTX2/CYB5A/AFMID/PA2G4/WDR46/KLHL18/ACSL1/GCAT/SAR1B/NFU1/COA4/BCAS3/GNL3/NDUFA8/PHF20/ATF4/IDH1/HBS1…
ZHOU_INFLAMMATORY_RESPONSE_LPS_UP	336	0.312459	1.33681	0.00482625	0.0197967	0.0110935	3087	tags=21%, list=11%, signal=19%	IGFBP3/IFI44/SYDE1/TNFSF9/IFIT3/SNAI1/BAMBI/WNT5A/HS3ST3B1/SIAE/SGPP2/IL1R1/IL1B/ZC3H12A/IFIT1/ICAM1/APCDD1L-DT/PML/CSF3/CXCL1/CXCL2/DENND5A/CCL20/IFIT2/MFSD2A/CXCL3/PTGS2/CGAS/STC2/RAB6B/NFKB2/EIF4E/RELB/FGFR1OP2/FOSL1/CLEC12B/PLAUR/RBM34/CREB5/BCL2L1/PTX3/SOCS1/ZNFX1/SERPINB2/IER3/PNMA2/OASL/PDLIM5/HSPA1A/ISG15/SPATS2/DUSP5/WNK4/MOB3A/ATP2B1/RIPK1/NT5C3A/PTPN1/TIMM50/NAMPT/ACSL1/MARCKS/TRIP10/D…
KEGG_STEROID_HORMONE_BIOSYNTHESIS	43	0.421538	1.33667	0.0949471	0.171304	0.095994	191	tags=9%, list=1%, signal=9%	AKR1C1/AKR1C2/AKR1C3/HSD11B1
LOCKWOOD_AMPLIFIED_IN_LUNG_CANCER	214	0.326747	1.3359	0.0170078	0.0494243	0.027696	5582	tags=37%, list=20%, signal=30%	RIT1/MAFB/TFRC/DAP/VEGFA/METTL1/AP2M1/CCT6A/SNX6/NAT10/DDX10/ARHGAP9/YKT6/CCT5/BAZ1A/TPM3/FAM177A1/S100A6/PNN/DUSP12/SLC4A2/TARS/HAX1/NDUFB5/NRDE2/RBM4/FADD/GEMIN2/MRM2/PPP2R3C/ALKBH4/CCDC107/SEC62/MYNN/FKBP9/MRPS17/EEF1AKMT4/ABCF2/MRPL9/LANCL2/FJX1/MANBAL/SSR2/TSFM/AIP/SMIM12/AGPAT1/DDIT3/CKS1B/GNS/COPS6/NPR1/SDHA/SEC61G/PI4KB/POLR2H/EIF4G1/DPP3/MED15/PRCC/PUF60/AP4S1/MRPL11/PCID2/FIGNL1/NDUFS2/…
WEST_ADRENOCORTICAL_TUMOR_DN	497	0.301871	1.33589	0.00221484	0.0112866	0.00632469	3275	tags=23%, list=12%, signal=21%	C3/DCN/PID1/CFH/CDH2/C1S/KYNU/SYDE1/C1R/GGT5/AKR1B1/LHFPL6/AOX1/CCN3/SMTN/MFAP5/PLEKHO2/ICAM1/TAGLN/FTSJ3/FBLN5/LSP1/IFITM2/MVP/CTSO/TM4SF1/PATZ1/NR2F1/IFI35/KCNQ1/FOS/RBMS3/GEM/SLCO2A1/CCDC85B/LYRM1/IER2/DNAJC12/ALAS1/OMD/HDDC2/DUSP1/DNAJB12/FOSB/MEPCE/BGN/KCTD14/TOB1/STUB1/GSDMD/CSF1/ZFP36L2/IER3/UBTF/NR4A1/FAH/C1QTNF1/SEPT4/APOL6/ATP1A2/KCNK3/SEPT6/NOCT/TLE2/CFD/EPHA2/IGFBP4/PODXL/FUT8/CUEDC2/…
WOTTON_RUNX_TARGETS_DN	27	0.463251	1.33568	0.114497	0.194213	0.108832	639	tags=19%, list=2%, signal=18%	PLOD2/MSLN/EGLN3/ENO2/SIPA1L2
REACTOME_SYNDECAN_INTERACTIONS	26	0.468703	1.3354	0.116081	0.19577	0.109704	1053	tags=23%, list=4%, signal=22%	SDC3/FN1/TNC/FGF2/SDC2/ITGB3
PID_UPA_UPAR_PATHWAY	35	0.438683	1.33539	0.101742	0.179131	0.10038	1079	tags=23%, list=4%, signal=22%	ITGA5/VLDLR/FN1/FPR1/PLAU/ITGB3/PLAUR/CRK
MULLIGHAN_NPM1_MUTATED_SIGNATURE_2_DN	72	0.381842	1.33537	0.0651417	0.130796	0.0732946	3731	tags=36%, list=13%, signal=31%	MMP15/LDLR/KCNQ1/RRP9/STK10/UTP11/FAM162A/LDHA/FXYD5/ALDOA/GAS6/DGKD/ELOC/GUCY1B1/CD7/PHB2/EIF3D/GRHPR/TUFM/EIF6/EEF1D/PES1/EHD1/C15orf39/CHST7/RARA
HU_ANGIOGENESIS_DN	36	0.435596	1.33535	0.0975721	0.174215	0.0976252	6860	tags=56%, list=24%, signal=42%	LONP1/CKS2/GTF2A2/SMYD2/POLR2K/ANXA7/H2AFZ/ATP5PO/SURF4/SET/MDH1/EIF3M/HMGN1/ATP6V1G1/SOD1/GPI/PSMB1/PFN2/VAPA/NDUFB6
FRASOR_RESPONSE_TO_ESTRADIOL_UP	32	0.447897	1.33534	0.104518	0.181926	0.101946	2082	tags=34%, list=7%, signal=32%	SLC22A5/AREG/PRSS23/FOS/SDC2/MAPT/CCN5/RAB31/IGFBP4/GREB1/CA12
REACTOME_CALNEXIN_CALRETICULIN_CYCLE	26	0.468673	1.33531	0.116081	0.19577	0.109704	5689	tags=50%, list=20%, signal=40%	EDEM2/TRIM13/UGGT1/UGGT2/RPS27A/PRKCSH/EDEM3/UBC/CALR/MAN1B1/DERL2/UBA52/EDEM1
PID_TRKR_PATHWAY	58	0.398239	1.3353	0.0751642	0.145479	0.0815223	5788	tags=34%, list=20%, signal=28%	RIT1/SQSTM1/CCND1/BDNF/MAGED1/CRK/GRB2/DNAJA3/RAP1B/DOCK1/STAT3/RGS19/NTRK1/SHC3/RAP1A/TIAM1/RAC1/SHC1/MAP2K1/EHD4
BIOCARTA_RACCYCD_PATHWAY	26	0.468622	1.33517	0.116081	0.19577	0.109704	371	tags=12%, list=1%, signal=11%	CDKN1A/IKBKG/CCND1
RUAN_RESPONSE_TO_TNF_DN	75	0.378364	1.33508	0.0586767	0.120666	0.0676176	3530	tags=35%, list=12%, signal=30%	ME1/GPAM/FABP5/SELENBP1/HK2/NR1H3/CDKN2C/ALAS1/NFS1/TOB1/NNMT/ECH1/CFD/RGS2/TALDO1/AK2/HIPK2/ABCD2/ACSL1/ARL4A/IDH1/PPARG/AOC3/CIDEC/IDH3G/RNF11
YAO_TEMPORAL_RESPONSE_TO_PROGESTERONE_CLUSTER_8	48	0.413494	1.33451	0.0864994	0.161101	0.0902761	2756	tags=33%, list=10%, signal=30%	PDZK1IP1/TFRC/MAT2A/NFIL3/ID1/MTHFD2/HK2/WDR43/NOCT/CTPS1/HSPH1/P4HA2/HOXA11/CYP26A1/PTGS1/TGFBR3
PID_AURORA_B_PATHWAY	39	0.428216	1.33202	0.0993072	0.175977	0.0986124	5167	tags=28%, list=18%, signal=23%	VIM/AURKA/NSUN2/KIF2C/SMC4/CUL3/CBX5/BIRC5/CDCA8/NDC80/PSMA3
REACTOME_PRC2_METHYLATES_HISTONES_AND_DNA	64	0.388838	1.33151	0.0723893	0.14127	0.0791637	3536	tags=23%, list=12%, signal=21%	HIST1H2AC/HIST1H2BK/HIST2H2AA4/HIST1H3G/HIST1H2BG/HIST1H2BD/HIST2H4A/EED/HIST1H2BN/HIST2H2BE/HIST1H3H/H2AFX/PHF1/HIST1H2BJ/H2AFZ
REACTOME_MEIOTIC_RECOMBINATION	76	0.376526	1.33031	0.0593093	0.121558	0.0681178	4363	tags=22%, list=15%, signal=19%	HIST1H2AC/HIST1H2BK/HIST2H2AA4/HIST1H3G/HIST1H2BG/HIST1H2BD/HIST2H4A/PSMC3IP/MLH3/HIST1H2BN/HIST2H2BE/HIST1H3H/H2AFX/HIST1H2BJ/H2AFZ/HIST1H2BC/NBN
YAGI_AML_WITH_T_8_21_TRANSLOCATION	334	0.311256	1.33028	0.00485909	0.0198336	0.0111142	3649	tags=25%, list=13%, signal=22%	CDH2/SERPINE2/UGP2/LAPTM5/AKR1C3/AREG/CCN3/VLDLR/IL27RA/STARD8/TXNRD1/QSOX1/HEXA/S100A4/MYRF/FBLN5/CCND1/TGOLN2/AURKA/ASF1A/SOCS3/ITPR1/SSR1/MAN1A1/ZNF274/STK10/RCN1/ENOSF1/CDKN2C/SORD/DDAH2/GNE/CCN5/BCL2L1/CEP170/UBA7/SELPLG/PTGIR/TSPAN7/CCND3/SAP30/TNFRSF1A/SPART/VOPP1/ACOT13/CFD/TNFSF4/BTN2A1/HDAC1/CXCR5/GGCX/BASP1/LCP1/SCML1/TFPI/SLC25A1/ADRM1/TSPAN3/SEC62/MGMT/IKBKE/GLS/ATP5MC1/CSTB/TNFRSF21…
RHEIN_ALL_GLUCOCORTICOID_THERAPY_DN	359	0.309184	1.32952	0.00501505	0.020299	0.011375	4661	tags=31%, list=16%, signal=27%	MME/UGP2/GBE1/PGD/UBE2L6/HSPA8/GAPDH/FABP5/RSL1D1/ZWINT/CCT6A/FOS/PSMB8/BCCIP/SSR1/PGK1/BLMH/MAGED1/SHCBP1/SORD/RTCA/SH3BGRL/PRDX1/TYMS/ISOC1/HDDC2/ENO1/FOSB/ANP32E/CHCHD3/JUN/CCND3/CNBP/LDHA/SERBP1/DYNLL1/TMEM97/CKS2/PSMA6/TUBA1C/ANP32A/PRMT1/RPP40/RAB13/PSMB9/ARPC5L/HEBP1/TALDO1/PSMD10/NDUFB5/ATIC/CCT3/CYB5A/AK2/VDAC1/ADSL/MLLT11/PRDX3/PRC1/CCT8/EID1/RBM8A/NDUFA8/TPI1/CCT7/CACYBP/PAICS/NME1/PXD…
MARTIN_NFKB_TARGETS_UP	36	0.433656	1.3294	0.101008	0.178146	0.0998281	499	tags=8%, list=2%, signal=8%	C3/C1S/VEGFA
BURTON_ADIPOGENESIS_PEAK_AT_0HR	57	0.39688	1.32866	0.0802035	0.152816	0.0856338	4222	tags=40%, list=15%, signal=34%	COL8A1/CCN3/GADD45A/FLOT1/ACTA2/CYB5R1/F3/SORD/PSMB10/CSF1/FAH/ISG15/TRIB3/VEGFC/MARCKS/PLAT/IDH1/MYL9/DDIT3/RAB11FIP5/TLN1/SERF2/CALML4
SHAFFER_IRF4_MULTIPLE_MYELOMA_PROGRAM	36	0.433383	1.32856	0.101924	0.179335	0.100494	2907	tags=28%, list=10%, signal=25%	P4HA1/NFIL3/PAM/UAP1/SLAMF7/TNFAIP3/PIM2/DUSP5/SUB1/E2F5
NOJIMA_SFRP2_TARGETS_DN	25	0.471496	1.32834	0.122667	0.203143	0.113836	2529	tags=44%, list=9%, signal=40%	IFI44/MDM2/CCND1/BCL2L1/GAS2L1/STAT1/IFITM1/IGFBP4/TSPAN5/GRN/BST2
FORTSCHEGGER_PHF8_TARGETS_UP	270	0.317566	1.32797	0.0156394	0.0465983	0.0261124	3506	tags=30%, list=12%, signal=26%	HMOX1/AKR1C1/SLC7A11/GRAMD1B/DCBLD1/VLDLR/NQO1/NMNAT1/PTPRJ/PDGFC/MOCS2/ID1/MRPL42/VEGFA/CDRT1/NR2F1/DNAJB4/MTHFD2/ITPR1/MAN1A1/JADE1/CHAC1/STC2/PABPC4/ADAMTS1/RIDA/ZG16B/CALU/DUSP2/ECE1/YKT6/BMP6/PYCR1/TGFBR2/GABPB1/HERPUD1/MOK/GCLC/LRP8/NR4A1/KLHL15/KCNK3/CDH24/TPCN1/RPIA/NSRP1/ARL6IP1/MESD/CERK/DDIT4/TNFRSF11B/EIF5/CMTM7/TFPI/HTRA3/TSPAN3/PTP4A1/SEC62/NEK10/CDC26/DDAH1/TIPIN/ZNF721/CCN2/XYLT2/…
BROWNE_HCMV_INFECTION_10HR_UP	88	0.366359	1.32773	0.0537991	0.113144	0.0634029	2570	tags=24%, list=9%, signal=22%	TAF13/IFI6/GBP1/LIG4/NCF2/PCDH9/ITPR1/DNAJB9/YKT6/TOP1/CLP1/FOSB/ANP32E/PIGH/HERPUD1/FEN1/RGS2/CREM/TIAL1/ZNF428/ARFIP2
ZHU_CMV_ALL_DN	115	0.351909	1.3277	0.0414278	0.0934876	0.0523878	2762	tags=25%, list=10%, signal=23%	IGFBP3/AKR1C1/LOX/C1R/FTL/ANPEP/CHN1/TAGLN/ACTA2/CCND1/AR/ACO1/RBMS1/CFHR1/PYCR1/AARS/TNFRSF1A/ANP32A/CFD/RAB13/FKBP10/TPM2/DDIT4/ENG/FLNA/MARCKS/EFEMP1/TGFBR3/UBL4A
REACTOME_E3_UBIQUITIN_LIGASES_UBIQUITINATE_TARGET_PROTEINS	58	0.395559	1.32631	0.0795427	0.152016	0.0851854	4596	tags=38%, list=16%, signal=32%	UBE2V2/HIST1H2BK/HIST1H2BG/HIST1H2BD/CDC73/HLA-A/VCP/PEX2/HIST1H2BN/CTR9/PEX5/SELENOS/PAF1/HIST1H2BJ/WDR61/PEX14/UBE2A/UBE2J2/RPS27A/UBC/HIST1H2BC/PRKDC
SESTO_RESPONSE_TO_UV_C6	39	0.426345	1.3262	0.103002	0.18052	0.101158	4250	tags=51%, list=15%, signal=44%	PTGR1/TGFBI/GADD45A/TNC/TPBG/ECH1/RGS2/CYB5A/COMMD1/ARL4A/PTGS1/ACO2/ATF4/GALE/TSC22D1/CKS1B/FDPS/STK25/POLD2/SEPT2
FUJII_YBX1_TARGETS_DN	192	0.328922	1.32461	0.0233869	0.0625012	0.0350239	4745	tags=31%, list=17%, signal=26%	PDE3B/SLC25A32/DBN1/SLC26A2/BAG2/GPX3/NEIL3/FABP5/ZWINT/DFFA/ITPR1/SSR1/NOP56/NCBP2/TIMM8A/CALU/SHCBP1/TBL1X/CD3EAP/ERCC8/CCT5/RECK/PRR3/HELLS/FEN1/FUT8/ODF2/COTL1/NUP62/TFPI/MLLT11/FLNA/SLC25A19/LMNB1/HNRNPL/METTL3/BPGM/TIPIN/ODC1/H2AFX/POLR3F/CENPK/KBTBD6/PRPF40A/RFC3/TOP2A/CKS1B/NUDT15/ITGAE/PTGES/PARPBP/CXCR4/CENPN/HMGB3/MYBL1/PRKDC/DTYMK/FIGNL1/RNASEH2A
DAUER_STAT3_TARGETS_DN	47	0.412156	1.32416	0.0950453	0.171304	0.095994	1681	tags=32%, list=6%, signal=30%	IFI44/IFIT3/IFIT1/TRIM22/IFI35/DNAJB4/SP110/LAP3/IFI27/STAT1/OASL/TMEM97/HSPA1A/ISG15/IFITM1
MULLIGHAN_NPM1_SIGNATURE_3_DN	147	0.340138	1.32405	0.0328002	0.0787205	0.0441127	3377	tags=28%, list=12%, signal=25%	NPR3/ITGA5/PMAIP1/HPCAL1/FGFR1/PDE4B/EMC1/LDLR/PLCB4/KCNQ1/SOCS3/ACSL4/SLC9A2/RRP9/PABPC4/DRG1/FLAD1/UTP11/TGFBR2/TSPAN7/LDHA/FXYD5/PSMA6/IFITM1/ZNF467/DUSP5/DGKD/ELOC/GUCY1B1/RNFT2/CD7/PHB2/EIF3D/GRHPR/TUFM/EIF6/EEF1D/PES1/TNFRSF25/DDO/EHD1
LEE_CALORIE_RESTRICTION_MUSCLE_UP	32	0.443796	1.32311	0.112277	0.19151	0.107317	4215	tags=47%, list=15%, signal=40%	ALDOC/PNP/FABP5/PPP1R2/ATP1A2/THBD/PEX5/PPARG/PSME1/SSR4/PSMC3/DDIT3/ACTB/PRKCSH/EEF1G
WALLACE_PROSTATE_CANCER_RACE_DN	87	0.365799	1.32243	0.0560938	0.116926	0.0655219	4001	tags=28%, list=14%, signal=24%	RTN1/PLOD2/PDE3B/NQO1/LIMCH1/PATZ1/EIF2S1/ZMYND8/ENOSF1/SRD5A3/CHKA/ZNF467/HS3ST2/SLC39A4/GLTP/STYXL1/RABEP1/RBM3/CDR2L/ADRB1/ELP5/TLE1/ENPP4/MEST
JIANG_AGING_HYPOTHALAMUS_UP	43	0.417042	1.32241	0.103408	0.181126	0.101498	5996	tags=56%, list=21%, signal=44%	CCT6A/B2M/ITPR1/PRDX1/SEPT4/PSMA6/NDUFB5/HEXB/RPS12/HSPE1/ATP5MD/ATP5PO/ACTB/COX7A2/ATP5F1C/ANP32B/BTG3/M6PR/PSMD14/CLK1/HSD17B4/MAP2K1/ATP5MG/SOD1
KIM_WT1_TARGETS_UP	213	0.323677	1.32215	0.0199768	0.0550713	0.0308604	2633	tags=25%, list=9%, signal=23%	CDH2/ZEB1/SYDE1/PCDH7/CXCL8/FERMT2/AREG/IMPA1/ENO2/GFPT2/TM4SF1/CD83/ENC1/F3/TNFAIP3/FGF5/GEM/PHLDA2/UTP3/LIF/IER2/NFKB2/RELB/FOSL1/PLAUR/SLC35G2/HMGA2/PTX3/TPBG/DNAJB5/RAB15/CSF1/IER3/BAZ1A/NR4A1/PDLIM5/EVI2B/EPHA2/DUSP5/ABHD10/KLF10/B3GNT2/SPHK1/ZYX/SH2B2/ATP2B1/DAPK3/ARC/ST3GAL5/ATG101/HNRNPL/WWTR1/CSNK1D/GLS
REACTOME_DNA_DAMAGE_TELOMERE_STRESS_INDUCED_SENESCENCE	74	0.374876	1.32202	0.0671124	0.133758	0.0749541	4363	tags=28%, list=15%, signal=24%	CDKN1A/HIST1H2AC/HIST1H2BK/HIST2H2AA4/ASF1A/HIST1H2BG/HIST1H2BD/HIST2H4A/HMGA2/HIST1H1C/HIRA/HIST1H2BN/HIST2H2BE/LMNB1/H2AFX/TERF2IP/HIST1H2BJ/H2AFZ/HIST1H2BC/TERF2/NBN
WANG_CLIM2_TARGETS_DN	180	0.330625	1.32196	0.025641	0.0664365	0.0372291	4243	tags=31%, list=15%, signal=26%	IFRD1/IFI6/PAM/CCDC86/IFIT1/DUSP3/ASF1A/SRRM1/CCT6A/ELOA/RDH11/FARSA/DHX36/SP100/RRP15/GTPBP4/CEBPZ/ATG12/CRK/NSUN4/YRDC/CTSB/DAXX/BLZF1/RARS/STAT1/PAM16/LIN7A/SEC23B/IRF9/PHF11/ISG15/SRA1/CLTA/AP1S1/ATP6V0E1/IDI1/MYNN/FAS/MSMO1/HBS1L/MRPL9/TNFRSF12A/AKIRIN2/PRPF40A/COIL/MRPS11/NDUFV3/MICOS10/TMEM11/KCTD5/TATDN1/ZNF281/KPNA5/CAMK2D
HEIDENBLAD_AMPLICON_12P11_12_UP	35	0.434161	1.32163	0.109303	0.187774	0.105223	3139	tags=26%, list=11%, signal=23%	IL7R/ANXA6/SAR1A/ERGIC2/GEM/ARHGEF2/ADSL/EIF2B2/PKNOX1
DIAZ_CHRONIC_MEYLOGENOUS_LEUKEMIA_DN	103	0.356211	1.32153	0.0517598	0.109609	0.0614218	1141	tags=15%, list=4%, signal=14%	S100A8/CDH2/S100A9/IL7R/MAFB/LHFPL6/TGFBI/FGFR1/ME1/GPX3/MVP/GAPDH/ACSL4/HLA-B/PRNP
BECKER_TAMOXIFEN_RESISTANCE_DN	52	0.401425	1.32117	0.0876485	0.162844	0.0912532	1148	tags=19%, list=4%, signal=18%	TRIM16/CXCL8/AREG/IL1R1/FGFR1/ME1/CCND1/TM4SF1/KHDRBS3/CEP170
CHIARADONNA_NEOPLASTIC_TRANSFORMATION_KRAS_UP	119	0.349015	1.32112	0.0399895	0.0911832	0.0510964	5383	tags=35%, list=19%, signal=29%	PCDH7/HAS2/AREG/CXorf38/CCND1/AURKA/IL1RL1/EFNB2/ZWINT/PHLDA1/TOP1/TPBG/TMSB4X/CTSB/ANP32E/NOCT/FUT8/GTF2A2/MED10/MRPL18/SEMA7A/SMS/H2AFX/RBM3/SPCS3/PPID/RGS16/TOP2A/CKS1B/PCLAF/TUBB6/SET/HMGB3/ERH/FIGNL1/CDC7/HNRNPD/ERGIC3/PSMA3/HPRT1/NAP1L1/DNMT1
GARGALOVIC_RESPONSE_TO_OXIDIZED_PHOSPHOLIPIDS_BLACK_UP	34	0.436489	1.32079	0.1105	0.189388	0.106127	5347	tags=38%, list=19%, signal=31%	CDKN1A/F2RL2/PRNP/SPRY4/CDC42EP2/TRIB3/RGMB/AKIRIN2/OSGIN2/ETV5/RHPN2/EIF1/CLK1
PHONG_TNF_RESPONSE_VIA_P38_COMPLETE	223	0.322009	1.32028	0.0185458	0.0524	0.0293635	3341	tags=26%, list=12%, signal=24%	SERPINE2/ITGA5/IL7R/PMAIP1/WNT5A/S100A4/INSIG1/LIMCH1/CD59/SDCBP/MGAT2/PNP/HTATIP2/MAFG/ATF3/SYNM/FOS/ZCCHC24/PTGS2/ZMYND8/CCDC85B/MTHFD2L/JADE1/GTPBP4/HLA-B/CRK/STK17A/FBXL5/BAZ1A/TMEM97/TCP1/CUX1/DUSP5/RAP2C/KLF10/MAP4K4/MBD4/TNFRSF11B/ATP2B1/SIKE1/MAP7D1/ZNF131/DIO2/MAP3K11/IKBKE/MSMO1/U2SURP/DLG5/NAV3/BCL3/IDH1/YIPF5/AGRN/DLST/THYN1/WRB/HOXA10/EVA1B/HDAC9
MULLIGHAN_MLL_SIGNATURE_2_UP	400	0.304334	1.32026	0.00443232	0.0185308	0.0103841	4145	tags=30%, list=15%, signal=26%	SRGN/KYNU/LAPTM5/COLGALT1/TIGAR/HCLS1/PLOD1/S100A4/CES1/TGOLN2/RAB29/HTATIP2/KRI1/ALDH3B1/SLC16A3/GTSE1/CEP164/SEL1L3/BEST1/CTSA/PSMB8/PLIN3/SLC22A18/TOR1AIP1/LRRC20/CASP1/PPP1R2/CYBA/SIPA1/PPIF/ISG20L2/PLEKHB2/SLC17A5/DMAC2/PLAUR/GRB2/TNFRSF10B/YKT6/CLTCL1/P4HB/ARL6IP5/RRBP1/SAFB2/ENO1/SELPLG/TMEM126B/PKM/CIAO1/CCND3/EXOSC4/RECK/SEC23B/SRRT/EVI2B/NXPE3/HSPA1A/OGG1/MRPL35/S100A6/PPT1/ATP6V1D/DENN…
CAFFAREL_RESPONSE_TO_THC_24HR_5_DN	56	0.395681	1.31996	0.0861279	0.160604	0.0899979	4679	tags=38%, list=16%, signal=31%	IMPA1/ARF4/ALG2/HERPUD1/SERPINB2/CALM3/RBM4/EIF5/SEC16A/HNRNPL/SUB1/ZRANB2/NME1/GARS/CDK1/ATP5MD/TYRO3/PCLAF/NDUFB3/UBE2C/RANBP1
TORCHIA_TARGETS_OF_EWSR1_FLI1_FUSION_DN	295	0.312539	1.31831	0.0136508	0.0419392	0.0235015	3293	tags=22%, list=12%, signal=19%	VIM/PDE3B/SUSD2/SLC39A8/KCNAB2/PTGR1/TGM2/BAMBI/TPK1/PPBP/HPCAL1/FUCA2/CCND1/LTBP1/PDE4B/NCF2/PLCB4/ENC1/FKBP11/KHDRBS3/GCNT2/PSMB8/ITPR1/HK2/RCN1/AP4B1/NCKAP1L/DUSP2/ITGB3/TRIB2/NLRC5/SELPLG/KCTD14/RSAD1/SEPT4/SEPT6/IGFBP4/PLXNC1/JCAD/SPRED1/PHPT1/PSMB9/SLC25A4/MAP4K4/MOB3A/LCP1/CMTM7/TSPAN3/RHOBTB3/IQGAP2/KRT10/LIPA/TGFBR3/BCKDHB/ADGRL2/SPCS3/CAVIN2/CNN3/FKBP1A/ARPC1B/BCR/PDXP/DCUN1D4/NQO2
KEGG_FATTY_ACID_METABOLISM	40	0.421742	1.31808	0.108384	0.186847	0.104704	4876	tags=30%, list=17%, signal=25%	ACOX3/ALDH1B1/ACSL4/ALDH9A1/ACSL5/ADH5/ACSL1/ECHS1/ACAT2/ACAA1/ADH1B/ACADVL
ZHANG_RESPONSE_TO_CANTHARIDIN_DN	65	0.384106	1.318	0.0765068	0.147691	0.0827616	4267	tags=38%, list=15%, signal=33%	FABP5/FARSA/NOP56/NOP16/ZNF200/ERCC2/HARS2/CTPS1/EIF3B/QDPR/RUVBL2/ATP5MC2/PA2G4/TIMM23/PGAM1/RHOC/EEF1D/SNRPC/SUPT16H/SNRPA1/NDUFB2/NDUFS3/POLD2/POLR2H/ATP5MC3
BASAKI_YBX1_TARGETS_UP	287	0.313334	1.31723	0.0135433	0.0417767	0.0234105	4988	tags=35%, list=18%, signal=29%	FBN1/TIMP2/PLK2/AREG/PRSS23/MAP1B/AFAP1L1/FGF2/MT1F/RRS1/HTATIP2/AURKA/SCO1/PLCB4/GTSE1/ZWINT/DLC1/BDNF/CHORDC1/CDC20/DHRS11/SHCBP1/KPNA2/TYMS/COX20/PSMC3IP/CCND3/NUDT5/PBK/WDR4/TOMM5/FEN1/EPHA2/GLRX2/CTPS1/COTL1/ARPC5L/SLC52A2/TPX2/CREM/OSMR/MT1X/SLC39A4/FLNA/PRPF3/AHSA1/PRC1/SAR1B/PROSER2/KIF2C/RFLNB/GLS/CACYBP/KRT10/CCN2/TNFRSF21/H2AFX/TNFRSF12A/CCM2/GINS1/WDHD1/CDK1/TUBB4B/SPDL1/ALYREF/WDR77/…
CERVERA_SDHB_TARGETS_2	106	0.353565	1.31695	0.0510363	0.108452	0.0607735	1952	tags=23%, list=7%, signal=21%	CFB/SERPINE2/CXCL8/AREG/HKDC1/HS3ST3B1/PCOLCE2/PRSS23/AFP/SLC26A2/GPRC5B/SIPA1L2/WLS/CREB5/PFKFB3/SH3BGRL/NMI/STK17A/DUSP1/FBN2/FSTL3/PAG1/TNFSF4/DDC
REACTOME_ASSEMBLY_AND_CELL_SURFACE_PRESENTATION_OF_NMDA_RECEPTORS	39	0.423302	1.31673	0.107159	0.185259	0.103814	4552	tags=36%, list=16%, signal=30%	TUBAL3/DLG4/GRIN2D/LIN7A/TUBA1C/APBA1/TUBB3/TUBB4B/TUBB2A/TUBA8/TUBB6/CAMK2D/LIN7C/TUBB2B
WIERENGA_STAT5A_TARGETS_UP	185	0.328262	1.31607	0.0253236	0.065893	0.0369246	2511	tags=21%, list=9%, signal=19%	CFH/SQSTM1/IL7R/GGT5/CXCL8/CDKN1C/TGM2/PSAT1/MUC1/NFIL3/SAMSN1/SPAG4/CD83/GPAT3/FAM129B/ENC1/CBS/PLAU/BATF3/IL18R1/PHLDA1/CKAP4/CIART/PLEKHA4/PRPS1/ANTXR2/CYSTM1/GNG2/IGFBP4/DUSP5/NAAA/P4HA2/SLC25A4/DDIT4/TRIB3/ST3GAL5/HSPA6/ARL4A
JOHANSSON_BRAIN_CANCER_EARLY_VS_LATE_DN	40	0.421015	1.31581	0.10931	0.187774	0.105223	2190	tags=25%, list=8%, signal=23%	DCN/ALDOC/CHN1/NSF/PLEKHB2/NCDN/TEF/IGFBP4/SELENOP/QDPR
PURBEY_TARGETS_OF_CTBP1_NOT_SATB1_UP	272	0.314197	1.31514	0.0174954	0.0502685	0.028169	3054	tags=20%, list=11%, signal=18%	CFH/SAA1/CADM3/JPH2/GBE1/PTGR1/PAPPA/SMTN/GDF15/TRMT6/SERPINH1/TAF7/ACTA2/GPAM/CXCL1/ALDH1B1/ZWINT/BIN1/PNO1/G6PD/BAX/P3H4/GOLM1/CCDC85B/HK2/HIST1H2BD/IL18R1/PTRH2/PPIF/ASB6/SP110/KPNA2/NMI/MEPCE/PRPF6/STXBP5-AS1/PQBP1/RBM26/IER3/SLC35E1/RNF114/PRKAG2/TRMU/CMTM7/DCBLD2/PTP4A1/RBM14/PPFIA4/SNX8/SARS2/LAMC1/RBM3/E2F5/EBNA1BP2/AOC3
SAKAI_CHRONIC_HEPATITIS_VS_LIVER_CANCER_UP	80	0.369558	1.31507	0.0621197	0.125885	0.0705423	5273	tags=34%, list=19%, signal=28%	SOD2/UBE2V2/GPX3/HIF1A/CASP4/ITPR1/CASP1/TXN/MICA/HSPA4/UPF3A/TCP1/GLRX2/SMNDC1/PRDX3/HSP90AA1/NCK1/CENPB/KPNA4/UBE2A/LAMTOR3/ST13/CBX3/PIGB/YME1L1/ATF6/UBE3A
FISCHER_G2_M_CELL_CYCLE	236	0.31896	1.3147	0.0174331	0.05018	0.0281194	4820	tags=30%, list=17%, signal=25%	ADGRE5/BIRC3/SMTN/MAT2A/CABYR/PIMREG/NEIL3/MGAT2/AURKA/LDLR/GTSE1/PLAU/RDH11/DUSP4/ACSL4/AMD1/SGO2/CDC20/KIF5B/EIF4E/SHCBP1/CDKN2C/KPNA2/TACC3/HMGA2/ANP32E/BAG3/STAT1/CDCA2/SAP30/BUB3/CKS2/PBK/ARL6IP1/TPX2/BCAR3/UBE2S/PRC1/ARL4A/KIF2C/TNFRSF21/STK17B/PSMD11/H2AFX/LAMC1/E2F5/SLCO1B3/NUP35/DCLRE1C/PKNOX1/CDK1/TSN/TOP2A/CKS1B/KIF20B/SFPQ/SPAG5/CHEK2/AC092338.1/TUBB/CCNB1/JPT1/UBE2C/BIRC5/HMGB3/BMP2/…
CHEN_LIVER_METABOLISM_QTL_CIS	82	0.367142	1.31367	0.0652174	0.130862	0.0733316	5085	tags=35%, list=18%, signal=29%	UAP1/CYB5R1/SCLY/TOR1AIP1/RGS5/CEP170/CFHR1/RPS6KC1/ODR4/C1orf53/DUSP12/DUSP23/MLPH/ADAMTS4/UCHL5/PPFIA4/MARC1/SMYD2/NME7/TMEM37/MRPS14/SLC30A1/ZRANB3/TATDN3/SOAT1/USF1/NAV1/SNED1/B4GALT3
[truncated: 1,912 more rows]

## Sheet: MCF10A_c3_PI3K_H1047R
Description	setSize	enrichmentScore	NES	pvalue	p.adjust	qvalues	rank	leading_edge	core_enrichment
[truncated: 653 more rows]

[truncated: 9 more sheets: MCF10A_hallmark_PI3K_Inhibition, MCF10A_c2_PI3K_Inhibition, MCF10A_c3_PI3K_Inhibition, MEF_hallmark_PI3K_Activation, MEF_c2_PI3K_Activation, MEF_c3_PI3K_Activation, MEF_hallmark_PI3K_Inhibition, MEF_c2_PI3K_Inhibition, MEF_c3_PI3K_Inhibition]
