# Supplementary material for: The Oncogenic PI3K-Induced Transcriptomic Landscape Reveals Key Functions in Splicing and Gene Expression Regulation
Source: Oxford University Press journal article supplement (doi:10.1158/0008-5472.can-22-0446), 2022-04-20
Supplement: can-22-0446-sst8.xlsx [file can-22-0446-sst8.xlsx]

## Sheet: Table S8
Sequence Position	Genomic Coordinate	Motif	K-mer	Z-score	P-value	Protein	mlog10pval	Target	Exon	Source	Table S8. RBPs list for all exons of candidates
21	chr6:41941787	rygcgcb	gcgcgcg	5.378	3.77e-08	RBM8A	7.42366	CCND3	CCND3:E029	RBPmap
23	chr6:41941789	rygcgcb	gcgcgcg	5.378	3.77e-08	RBM8A	7.42366	CCND3	CCND3:E029	RBPmap
19	chr6:41941785	rygcgcb	gcgcgcg	5.365	4.05e-08	RBM8A	7.39254	CCND3	CCND3:E029	RBPmap
1257	chr8:17645060	uaguwrg	uaguuag	5.061	2.09e-07	MSI1	6.67985	MTUS1	MTUS1:E003	RBPmap
1261	chr8:17645064	uaguwrg	uaguuag	5.061	2.09e-07	MSI1	6.67985	MTUS1	MTUS1:E003	RBPmap
19	chr8:141001304	gcgcgu	gcgcgu	5.055	2.15e-07	RBM4	6.66756	PTK2	PTK2:E150	RBPmap
191	chr14:21263183	aucaacg	aucauca	5.047	2.24e-07	SRSF3	6.64975	HNRNPC	HNRNPC:E056	CisRBP
194	chr14:21263186	aucaacg	aucauca	5.047	2.24e-07	SRSF3	6.64975	HNRNPC	HNRNPC:E056	CisRBP
197	chr14:21263189	aucaacg	aucauca	5.047	2.24e-07	SRSF3	6.64975	HNRNPC	HNRNPC:E056	CisRBP
200	chr14:21263192	aucaacg	aucauca	5.047	2.24e-07	SRSF3	6.64975	HNRNPC	HNRNPC:E056	CisRBP
17	chr8:141001302	rygcgcb	gcgcgcg	5.027	2.49e-07	RBM8A	6.6038	PTK2	PTK2:E150	RBPmap
162	chr8:140735448	acacaca	acacaca	5	2.87e-07	hnRNPLL	6.54212	PTK2	PTK2:E051	CisRBP
162	chr8:140735448	rcahaca	acacaca	5	2.87e-07	HNRPLL	6.54212	PTK2	PTK2:E051	RBPmap
25	chr6:41941791	rygcgcb	gcgcgcc	4.986	3.08e-07	RBM8A	6.51145	CCND3	CCND3:E029	RBPmap
176	chr14:21263168	aucaacg	aucauca	4.984	3.11e-07	SRSF3	6.50724	HNRNPC	HNRNPC:E056	CisRBP
10	chr3:48689547	rcahaca	acacaca	4.975	3.26e-07	HNRPLL	6.48678	IP6K2	IP6K2:E002	RBPmap
17	chr6:41941783	rygcgcb	ccgcgcg	4.973	3.3e-07	RBM8A	6.48149	CCND3	CCND3:E029	RBPmap
10	chr3:48689547	acacaca	acacaca	4.962	3.49e-07	hnRNPLL	6.45717	IP6K2	IP6K2:E002	CisRBP
15	chr8:141001328	rygcgcb	gcgcgcg	4.905	4.67e-07	RBM8A	6.33068	PTK2	PTK2:E151	RBPmap
105	chr17:76072449	cgccg	cgccg	4.905	4.67e-07	EIF4G2	6.33068	SRP68	SRP68:E040	RBPmap
108	chr17:76072452	cgccg	cgccg	4.905	4.67e-07	EIF4G2	6.33068	SRP68	SRP68:E040	RBPmap
111	chr17:76072455	cgccg	cgccg	4.905	4.67e-07	EIF4G2	6.33068	SRP68	SRP68:E040	RBPmap
114	chr17:76072458	cgccg	cgccg	4.905	4.67e-07	EIF4G2	6.33068	SRP68	SRP68:E040	RBPmap
15	chr8:141001328	gcgcgu	gcgcgc	4.904	4.7e-07	RBM4	6.3279	PTK2	PTK2:E151	RBPmap
117	chr17:76072461	cgccg	cgccg	4.876	5.41e-07	EIF4G2	6.2668	SRP68	SRP68:E040	RBPmap
7	chr8:141001292	gcgcgu	gcgcgg	4.863	5.78e-07	RBM4	6.23807	PTK2	PTK2:E150	RBPmap
17	chr8:141001302	gcgcgu	gcgcgc	4.849	6.2e-07	RBM4	6.20761	PTK2	PTK2:E150	RBPmap
72	chr17:76072416	cgccg	cgccg	4.848	6.24e-07	EIF4G2	6.20482	SRP68	SRP68:E040	RBPmap
75	chr17:76072419	cgccg	cgccg	4.848	6.24e-07	EIF4G2	6.20482	SRP68	SRP68:E040	RBPmap
17	chr8:141001330	gcgcgu	gcgcgu	4.836	6.62e-07	RBM4	6.17914	PTK2	PTK2:E151	RBPmap
52	chr11:14278733	guaguagu	ggaguagu	4.836	6.62e-07	HNRNPA1	6.17914	RRAS2	RRAS2:E004	RBPmap
1278	chr8:140669702	acacaca	acacaca	4.835	6.66e-07	hnRNPLL	6.17653	PTK2	PTK2:E019	CisRBP
1278	chr8:140669702	rcahaca	acacaca	4.835	6.66e-07	HNRPLL	6.17653	PTK2	PTK2:E019	RBPmap
158	chr8:140735444	acacaca	acauaca	4.81	7.55e-07	hnRNPLL	6.12205	PTK2	PTK2:E051	CisRBP
158	chr8:140735444	rcahaca	acauaca	4.81	7.55e-07	HNRPLL	6.12205	PTK2	PTK2:E051	RBPmap
15	chr8:141001300	rygcgcb	ccgcgcg	4.784	8.59e-07	RBM8A	6.06601	PTK2	PTK2:E150	RBPmap
1	chr7:105203733	gukgykg	guggugg	4.738	1.08e-06	HNRNPF	5.96658	SRPK2	SRPK2:E040	RBPmap
162	chr8:140735448	amayama	acacaca	4.733	1.11e-06	HNRNPL	5.95468	PTK2	PTK2:E051	RBPmap
14	chr3:48689551	rcahaca	acacgca	4.722	1.17e-06	HNRPLL	5.93181	IP6K2	IP6K2:E002	RBPmap
1278	chr8:140669702	amayama	acacaca	4.72	1.18e-06	HNRNPL	5.92812	PTK2	PTK2:E019	RBPmap
200	chr6:41941719	gcgcgss	gcgcggg	4.714	1.21e-06	RBM4	5.91721	CCND3	CCND3:E027	RBPmap
207	chr6:41941726	gcgcgss	gcgcggg	4.714	1.21e-06	RBM4	5.91721	CCND3	CCND3:E027	RBPmap
14	chr3:48689551	acacaca	acacgca	4.709	1.24e-06	hnRNPLL	5.90658	IP6K2	IP6K2:E002	CisRBP
15	chr6:41941781	rygcgcb	gcccgcg	4.703	1.28e-06	RBM8A	5.89279	CCND3	CCND3:E029	RBPmap
206	chr14:21263198	aacaucd	accauca	4.701	1.29e-06	YBX1	5.88941	HNRNPC	HNRNPC:E056	RBPmap
21	chr6:41941787	gcgcgu	gcgcgc	4.699	1.31e-06	RBM4	5.88273	CCND3	CCND3:E029	RBPmap
23	chr6:41941789	gcgcgu	gcgcgc	4.699	1.31e-06	RBM4	5.88273	CCND3	CCND3:E029	RBPmap
25	chr6:41941791	gcgcgu	gcgcgc	4.699	1.31e-06	RBM4	5.88273	CCND3	CCND3:E029	RBPmap
8	chr3:48689545	rcahaca	ccacaca	4.696	1.33e-06	HNRPLL	5.87615	IP6K2	IP6K2:E002	RBPmap
8	chr3:48689545	acacaca	ccacaca	4.684	1.41e-06	hnRNPLL	5.85078	IP6K2	IP6K2:E002	CisRBP
19	chr6:41941785	gcgcgu	gcgcgc	4.658	1.6e-06	RBM4	5.79588	CCND3	CCND3:E029	RBPmap
299	chr7:105142306	aucaacg	aucauca	4.656	1.61e-06	SRSF3	5.79317	SRPK2	SRPK2:E023	CisRBP
21	chr6:41941787	ssgcgcs	gcgcgcg	4.654	1.63e-06	RC1	5.78781	CCND3	CCND3:E029	RBPmap
23	chr6:41941789	ssgcgcs	gcgcgcg	4.654	1.63e-06	RC1	5.78781	CCND3	CCND3:E029	RBPmap
206	chr14:21263198	aacauca	accauca	4.641	1.73e-06	CSDA	5.76195	HNRNPC	HNRNPC:E056	CisRBP
19	chr6:41941785	ssgcgcs	gcgcgcg	4.641	1.73e-06	RC1	5.76195	CCND3	CCND3:E029	RBPmap
49	chr11:14278730	guaguagu	guaggagu	4.639	1.75e-06	HNRNPA1	5.75696	RRAS2	RRAS2:E004	RBPmap
191	chr14:21263183	aacaucd	aucauca	4.636	1.78e-06	YBX1	5.74958	HNRNPC	HNRNPC:E056	RBPmap
194	chr14:21263186	aacaucd	aucauca	4.636	1.78e-06	YBX1	5.74958	HNRNPC	HNRNPC:E056	RBPmap
197	chr14:21263189	aacaucd	aucauca	4.636	1.78e-06	YBX1	5.74958	HNRNPC	HNRNPC:E056	RBPmap
1265	chr8:17645068	uaguwrg	uaguuug	4.636	1.78e-06	MSI1	5.74958	MTUS1	MTUS1:E003	RBPmap
1274	chr8:140669698	acacaca	acagaca	4.633	1.8e-06	hnRNPLL	5.74473	PTK2	PTK2:E019	CisRBP
1274	chr8:140669698	rcahaca	acagaca	4.633	1.8e-06	HNRPLL	5.74473	PTK2	PTK2:E019	RBPmap
63	chr17:76072407	cgccg	cgccg	4.629	1.84e-06	EIF4G2	5.73518	SRP68	SRP68:E040	RBPmap
10	chr3:48689547	amayama	acacaca	4.627	1.86e-06	HNRNPL	5.73049	IP6K2	IP6K2:E002	RBPmap
200	chr14:21263192	aacaucd	aucauca	4.623	1.89e-06	YBX1	5.72354	HNRNPC	HNRNPC:E056	RBPmap
203	chr14:21263195	aucaacg	aucacca	4.609	2.02e-06	SRSF3	5.69465	HNRNPC	HNRNPC:E056	CisRBP
19	chr8:141001304	rygcgcb	gcgcgug	4.595	2.16e-06	RBM8A	5.66555	PTK2	PTK2:E150	RBPmap
302	chr7:105142309	aucaacg	aucaucu	4.594	2.17e-06	SRSF3	5.66354	SRPK2	SRPK2:E023	CisRBP
308	chr7:105142315	aucaacg	uucaucg	4.594	2.17e-06	SRSF3	5.66354	SRPK2	SRPK2:E023	CisRBP
7	chr8:141001292	gcgcgg	gcgcgg	4.593	2.18e-06	RBM4B	5.66154	PTK2	PTK2:E150	RBPmap
1273	chr8:140669697	gacaga	gacaga	4.587	2.25e-06	CNOT4	5.64782	PTK2	PTK2:E019	RBPmap
21	chr6:41941787	gcgcgcg	gcgcgcg	4.582	2.3e-06	PPRC1	5.63827	CCND3	CCND3:E029	CisRBP
23	chr6:41941789	gcgcgcg	gcgcgcg	4.582	2.3e-06	PPRC1	5.63827	CCND3	CCND3:E029	CisRBP
228	chr14:21263220	uaaua	uaaua	4.582	2.3e-06	ZFP36	5.63827	HNRNPC	HNRNPC:E056	RBPmap
231	chr14:21263223	uaaua	uaaua	4.582	2.3e-06	ZFP36	5.63827	HNRNPC	HNRNPC:E056	RBPmap
238	chr14:21263230	uaaua	uaaua	4.582	2.3e-06	ZFP36	5.63827	HNRNPC	HNRNPC:E056	RBPmap
21	chr8:141001306	rygcgcb	gcgugcg	4.581	2.31e-06	RBM8A	5.63639	PTK2	PTK2:E150	RBPmap
191	chr14:21263183	aacauca	aucauca	4.577	2.36e-06	CSDA	5.62709	HNRNPC	HNRNPC:E056	CisRBP
194	chr14:21263186	aacauca	aucauca	4.577	2.36e-06	CSDA	5.62709	HNRNPC	HNRNPC:E056	CisRBP
197	chr14:21263189	aacauca	aucauca	4.577	2.36e-06	CSDA	5.62709	HNRNPC	HNRNPC:E056	CisRBP
225	chr14:21263217	uaaua	uaaua	4.573	2.4e-06	ZFP36	5.61979	HNRNPC	HNRNPC:E056	RBPmap
36	chr11:14358798	cgccg	cgccg	4.571	2.43e-06	EIF4G2	5.61439	RRAS2	RRAS2:E023	RBPmap
45	chr11:14358807	cgccg	cgccg	4.571	2.43e-06	EIF4G2	5.61439	RRAS2	RRAS2:E023	RBPmap
19	chr6:41941785	gcgcgcg	gcgcgcg	4.57	2.44e-06	PPRC1	5.61261	CCND3	CCND3:E029	CisRBP
200	chr14:21263192	aacauca	aucauca	4.564	2.51e-06	CSDA	5.60033	HNRNPC	HNRNPC:E056	CisRBP
17	chr6:41941783	ssgcgcs	ccgcgcg	4.564	2.51e-06	RC1	5.60033	CCND3	CCND3:E029	RBPmap
220	chr14:21263212	uaaua	uaaua	4.564	2.51e-06	ZFP36	5.60033	HNRNPC	HNRNPC:E056	RBPmap
7	chr8:141001292	rygcgcb	gcgcggg	4.554	2.63e-06	RBM8A	5.58004	PTK2	PTK2:E150	RBPmap
13	chr8:141001298	rygcgcb	gcccgcg	4.527	2.99e-06	RBM8A	5.52433	PTK2	PTK2:E150	RBPmap
163	chr8:140735449	uacaca	cacaca	4.526	3.01e-06	HNRNPL	5.52143	PTK2	PTK2:E051	RBPmap
1280	chr8:140669704	amayama	acacaaa	4.52	3.09e-06	HNRNPL	5.51004	PTK2	PTK2:E019	RBPmap
84	chr7:105146576	rcahaca	acacaca	4.519	3.11e-06	HNRPLL	5.50724	SRPK2	SRPK2:E028	RBPmap
84	chr7:105146576	acacaca	acacaca	4.506	3.3e-06	hnRNPLL	5.48149	SRPK2	SRPK2:E028	CisRBP
17	chr6:41941783	gcgcgcg	ccgcgcg	4.494	3.49e-06	PPRC1	5.45717	CCND3	CCND3:E029	CisRBP
110	chr16:1385317	gckgghm	gcuggac	4.494	3.49e-06	SAMD4A	5.45717	UNKL	UNKL:E026	RBPmap
44	chr7:105117569	acacaaa	acacaac	4.493	3.51e-06	ENSG00000215042	5.45469	SRPK2	SRPK2:E012	CisRBP
156	chr1:52992953	kauauas	uauauag	4.493	3.51e-06	RBMS1	5.45469	RRAS2	RRAS2:E005	RBPmap
44	chr7:105117569	acacrav	acacaac	4.493	3.51e-06	HNRNPL	5.45469	SRPK2	SRPK2:E012	RBPmap
25	chr6:41941791	ssgcgcs	gcgcgcc	4.487	3.61e-06	RC1	5.44249	CCND3	CCND3:E029	RBPmap
113	chr6:41936308	ccaaccc	ccaaacc	4.485	3.65e-06	hnRNPK	5.43771	CCND3	CCND3:E007	CisRBP
164	chr8:17755784	aucaacg	aucaucu	4.484	3.66e-06	SRSF3	5.43652	MTUS1	MTUS1:E065	CisRBP
158	chr8:140735444	amayama	acauaca	4.467	3.97e-06	HNRNPL	5.40121	PTK2	PTK2:E051	RBPmap
374	chr11:14359136	ssagcgm	gcagcgc	4.466	3.98e-06	ZC3H10	5.40012	RRAS2	RRAS2:E023	RBPmap
11	chr8:140744778	aygacr	aaugac	4.457	4.16e-06	FXR1	5.38091	PTK2	PTK2:E062	RBPmap
176	chr14:21263168	aacaucd	aucauca	4.455	4.19e-06	YBX1	5.37779	HNRNPC	HNRNPC:E056	RBPmap
200	chr6:41941719	gcgcgg	gcgcgg	4.453	4.23e-06	RBM4B	5.37366	CCND3	CCND3:E027	RBPmap
207	chr6:41941726	gcgcgg	gcgcgg	4.453	4.23e-06	RBM4B	5.37366	CCND3	CCND3:E027	RBPmap
102	chr7:105206502	hrkacag	cagacag	4.453	4.23e-06	ENOX1	5.37366	SRPK2	SRPK2:E041	RBPmap
76	chr3:48694947	gragga	ggagga	4.452	4.25e-06	SRSF1	5.37161	IP6K2	IP6K2:E035	RBPmap
79	chr3:48694950	gragga	ggagga	4.452	4.25e-06	SRSF1	5.37161	IP6K2	IP6K2:E035	RBPmap
88	chr3:48694959	gragga	ggagga	4.452	4.25e-06	SRSF1	5.37161	IP6K2	IP6K2:E035	RBPmap
17	chr8:141001302	gcgcgcg	gcgcgcg	4.449	4.31e-06	PPRC1	5.36552	PTK2	PTK2:E150	CisRBP
17	chr8:141001302	ssgcgcs	gcgcgcg	4.449	4.31e-06	RC1	5.36552	PTK2	PTK2:E150	RBPmap
22	chr11:14358784	cgccg	cgccg	4.448	4.33e-06	EIF4G2	5.36351	RRAS2	RRAS2:E023	RBPmap
161	chr8:140735447	uacaca	uacaca	4.447	4.35e-06	HNRNPL	5.36151	PTK2	PTK2:E051	RBPmap
175	chr14:21210787	acacaca	acacaca	4.443	4.44e-06	hnRNPLL	5.35262	HNRNPC	HNRNPC:E007	CisRBP
175	chr14:21210787	rcahaca	acacaca	4.443	4.44e-06	HNRPLL	5.35262	HNRNPC	HNRNPC:E007	RBPmap
206	chr14:21263198	aacauca	accauca	4.438	4.54e-06	YB-1	5.34294	HNRNPC	HNRNPC:E056	CisRBP
176	chr8:17755796	aucaacg	aucauca	4.438	4.54e-06	SRSF3	5.34294	MTUS1	MTUS1:E065	CisRBP
1280	chr8:140669704	acacaaa	acacaaa	4.437	4.56e-06	ENSG00000215042	5.34104	PTK2	PTK2:E019	CisRBP
154	chr1:52992951	uguanaua	uguauaua	4.432	4.67e-06	UM2	5.33068	RRAS2	RRAS2:E005	RBPmap
21	chr8:141001306	gcgcgu	gcgugc	4.425	4.82e-06	RBM4	5.31695	PTK2	PTK2:E150	RBPmap
5	chr16:1414725	cgccg	cgccg	4.419	4.96e-06	EIF4G2	5.30452	UNKL	UNKL:E050	RBPmap
25	chr6:41941791	gcgcgcg	gcgcgcc	4.418	4.98e-06	PPRC1	5.30277	CCND3	CCND3:E029	CisRBP
175	chr14:21210787	amayama	acacaca	4.413	5.1e-06	HNRNPL	5.29243	HNRNPC	HNRNPC:E007	RBPmap
191	chr14:21263183	aacauca	aucauca	4.412	5.12e-06	YB-1	5.29073	HNRNPC	HNRNPC:E056	CisRBP
194	chr14:21263186	aacauca	aucauca	4.412	5.12e-06	YB-1	5.29073	HNRNPC	HNRNPC:E056	CisRBP
197	chr14:21263189	aacauca	aucauca	4.412	5.12e-06	YB-1	5.29073	HNRNPC	HNRNPC:E056	CisRBP
113	chr6:41936308	ccawmcc	ccaaacc	4.406	5.26e-06	HNRNPK	5.27901	CCND3	CCND3:E007	RBPmap
16	chr14:21211322	acacaca	acaaaca	4.405	5.29e-06	hnRNPLL	5.27654	HNRNPC	HNRNPC:E018	CisRBP
3	chr16:1414058	acacaca	acaaaca	4.405	5.29e-06	hnRNPLL	5.27654	UNKL	UNKL:E045	CisRBP
16	chr14:21211322	rcahaca	acaaaca	4.405	5.29e-06	HNRPLL	5.27654	HNRNPC	HNRNPC:E018	RBPmap
3	chr16:1414058	rcahaca	acaaaca	4.405	5.29e-06	HNRPLL	5.27654	UNKL	UNKL:E045	RBPmap
200	chr14:21263192	aacauca	aucauca	4.4	5.41e-06	YB-1	5.2668	HNRNPC	HNRNPC:E056	CisRBP
176	chr14:21263168	aacauca	aucauca	4.397	5.49e-06	CSDA	5.26043	HNRNPC	HNRNPC:E056	CisRBP
15	chr8:141001300	gcgcgcg	ccgcgcg	4.397	5.49e-06	PPRC1	5.26043	PTK2	PTK2:E150	CisRBP
15	chr8:141001300	ssgcgcs	ccgcgcg	4.397	5.49e-06	RC1	5.26043	PTK2	PTK2:E150	RBPmap
19	chr8:141001304	gcgcgg	gcgcgu	4.395	5.54e-06	RBM4B	5.25649	PTK2	PTK2:E150	RBPmap
12	chr3:48689549	rcahaca	acacacg	4.392	5.62e-06	HNRPLL	5.25026	IP6K2	IP6K2:E002	RBPmap
16	chr3:48689553	rcahaca	acgcaca	4.392	5.62e-06	HNRPLL	5.25026	IP6K2	IP6K2:E002	RBPmap
179	chr14:21263171	aucaacg	aucagug	4.391	5.64e-06	SRSF3	5.24872	HNRNPC	HNRNPC:E056	CisRBP
28	chr6:41941794	cgccg	cgccg	4.39	5.67e-06	EIF4G2	5.24642	CCND3	CCND3:E029	RBPmap
137	chr11:14358899	cgccg	cgccg	4.39	5.67e-06	EIF4G2	5.24642	RRAS2	RRAS2:E023	RBPmap
145	chr11:14358907	cgccg	cgccg	4.39	5.67e-06	EIF4G2	5.24642	RRAS2	RRAS2:E023	RBPmap
5	chr16:1413850	cgccg	cgccg	4.39	5.67e-06	EIF4G2	5.24642	UNKL	UNKL:E043	RBPmap
12	chr3:48689549	acacaca	acacacg	4.38	5.93e-06	hnRNPLL	5.22695	IP6K2	IP6K2:E002	CisRBP
16	chr3:48689553	acacaca	acgcaca	4.38	5.93e-06	hnRNPLL	5.22695	IP6K2	IP6K2:E002	CisRBP
160	chr8:140735446	acacaca	auacaca	4.38	5.93e-06	hnRNPLL	5.22695	PTK2	PTK2:E051	CisRBP
160	chr8:140735446	rcahaca	auacaca	4.38	5.93e-06	HNRPLL	5.22695	PTK2	PTK2:E051	RBPmap
1257	chr8:17645060	uagauag	uaguuag	4.379	5.96e-06	HNRPDL	5.22475	MTUS1	MTUS1:E003	CisRBP
1261	chr8:17645064	uagauag	uaguuag	4.379	5.96e-06	HNRPDL	5.22475	MTUS1	MTUS1:E003	CisRBP
90	chr3:48694961	ggagwd	aggaga	4.379	5.96e-06	SRSF2	5.22475	IP6K2	IP6K2:E035	RBPmap
1274	chr14:21210409	kurrukk	guagugu	4.37	6.21e-06	SFPQ	5.20691	HNRNPC	HNRNPC:E001	RBPmap
9	chr16:1414064	acacaca	acagaca	4.367	6.3e-06	hnRNPLL	5.20066	UNKL	UNKL:E045	CisRBP
209	chr14:21263201	uucauaa	aucauaa	4.367	6.3e-06	NOVA1	5.20066	HNRNPC	HNRNPC:E056	RBPmap
9	chr16:1414064	rcahaca	acagaca	4.367	6.3e-06	HNRPLL	5.20066	UNKL	UNKL:E045	RBPmap
13	chr8:141001326	rygcgcb	aggcgcg	4.365	6.36e-06	RBM8A	5.19654	PTK2	PTK2:E151	RBPmap
4	chr7:105203736	gukgykg	guggcgg	4.361	6.47e-06	HNRNPF	5.1891	SRPK2	SRPK2:E040	RBPmap
10	chr14:21211316	acacaca	acagaca	4.354	6.68e-06	hnRNPLL	5.17522	HNRNPC	HNRNPC:E018	CisRBP
10	chr14:21211316	rcahaca	acagaca	4.354	6.68e-06	HNRPLL	5.17522	HNRNPC	HNRNPC:E018	RBPmap
8	chr3:48689545	amayama	ccacaca	4.347	6.9e-06	HNRNPL	5.16115	IP6K2	IP6K2:E002	RBPmap
1274	chr8:140669698	amayama	acagaca	4.347	6.9e-06	HNRNPL	5.16115	PTK2	PTK2:E019	RBPmap
158	chr1:52992955	kauauas	uauagac	4.342	7.06e-06	RBMS1	5.1512	RRAS2	RRAS2:E005	RBPmap
33	chr8:140746893	uuuuuuuuu	uuuuuuuuu	4.339	7.16e-06	RBM24	5.14509	PTK2	PTK2:E066	RBPmap
34	chr8:140746894	uuuuuuuuu	uuuuuuuuu	4.339	7.16e-06	RBM24	5.14509	PTK2	PTK2:E066	RBPmap
35	chr8:140746895	uuuuuuuuu	uuuuuuuuu	4.339	7.16e-06	RBM24	5.14509	PTK2	PTK2:E066	RBPmap
1095	chr8:17644898	gguaguag	gguagaag	4.338	7.19e-06	HNRNPA2B1	5.14327	MTUS1	MTUS1:E003	RBPmap
11	chr6:41941777	cgccg	cgccg	4.333	7.35e-06	EIF4G2	5.13371	CCND3	CCND3:E029	RBPmap
1276	chr8:140669700	amayama	agacaca	4.333	7.35e-06	HNRNPL	5.13371	PTK2	PTK2:E019	RBPmap
98	chr16:1385305	gckgghm	gcuggac	4.333	7.35e-06	SAMD4A	5.13371	UNKL	UNKL:E026	RBPmap
136	chr11:14278817	guaguagu	guuguagu	4.328	7.52e-06	HNRNPA1	5.12378	RRAS2	RRAS2:E004	RBPmap
81	chr3:48694952	hggagwa	aggagaa	4.324	7.66e-06	LIN28A	5.11577	IP6K2	IP6K2:E035	RBPmap
115	chr3:48694986	gggaggg	gggaggg	4.322	7.73e-06	HNRNPH2	5.11182	IP6K2	IP6K2:E035	RBPmap
81	chr3:48694952	ggagwd	aggaga	4.322	7.73e-06	SRSF2	5.11182	IP6K2	IP6K2:E035	RBPmap
46	chr11:14358808	acgacg	gccgac	4.321	7.77e-06	SRSF7	5.10958	RRAS2	RRAS2:E023	RBPmap
1277	chr8:140669701	gacaga	gacaca	4.304	8.39e-06	CNOT4	5.07624	PTK2	PTK2:E019	RBPmap
96	chr3:48694967	gggaggg	gggaggg	4.289	8.97e-06	HNRNPH2	5.04721	IP6K2	IP6K2:E035	RBPmap
1257	chr8:17645060	uagkwwr	uaguuag	4.284	9.18e-06	DAZAP1	5.03716	MTUS1	MTUS1:E003	RBPmap
1261	chr8:17645064	uagkwwr	uaguuag	4.284	9.18e-06	DAZAP1	5.03716	MTUS1	MTUS1:E003	RBPmap
12	chr3:48689549	amayama	acacacg	4.28	9.34e-06	HNRNPL	5.02965	IP6K2	IP6K2:E002	RBPmap
28	chr11:14358284	gcgcgg	gcgcgg	4.279	9.39e-06	RBM4B	5.02733	RRAS2	RRAS2:E022	RBPmap
3	chr8:17675990	acacaca	aaauaca	4.278	9.43e-06	hnRNPLL	5.02549	MTUS1	MTUS1:E031	CisRBP
1276	chr8:140669700	acacaca	agacaca	4.278	9.43e-06	hnRNPLL	5.02549	PTK2	PTK2:E019	CisRBP
1280	chr8:140669704	acacaca	acacaaa	4.278	9.43e-06	hnRNPLL	5.02549	PTK2	PTK2:E019	CisRBP
1276	chr8:140669700	rcahaca	agacaca	4.278	9.43e-06	HNRPLL	5.02549	PTK2	PTK2:E019	RBPmap
1280	chr8:140669704	rcahaca	acacaaa	4.278	9.43e-06	HNRPLL	5.02549	PTK2	PTK2:E019	RBPmap
176	chr14:21263168	aacauca	aucauca	4.275	9.56e-06	YB-1	5.01954	HNRNPC	HNRNPC:E056	CisRBP
5	chr8:17675992	auaca	auaca	4.275	9.56e-06	IGF2BP1	5.01954	MTUS1	MTUS1:E031	RBPmap
4	chr6:41941770	rygcgcb	gcccgcc	4.27	9.77e-06	RBM8A	5.01011	CCND3	CCND3:E029	RBPmap
8	chr6:41941774	rygcgcb	gcccgcc	4.27	9.77e-06	RBM8A	5.01011	CCND3	CCND3:E029	RBPmap
1288	chr8:140669712	acacaaa	acacgau	4.268	9.86e-06	ENSG00000215042	5.00612	PTK2	PTK2:E019	CisRBP
1288	chr8:140669712	acacrav	acacgau	4.268	9.86e-06	HNRNPL	5.00612	PTK2	PTK2:E019	RBPmap
1	chr8:17675988	acacaca	acaaaua	4.266	9.95e-06	hnRNPLL	5.00218	MTUS1	MTUS1:E031	CisRBP
3	chr8:17675990	rcahaca	aaauaca	4.266	9.95e-06	HNRPLL	5.00218	MTUS1	MTUS1:E031	RBPmap
218	chr6:41941737	gcgcgss	gcgcugg	4.264	1e-05	RBM4	5	CCND3	CCND3:E027	RBPmap
224	chr6:41941743	gcgcgss	gcgcugg	4.264	1e-05	RBM4	5	CCND3	CCND3:E027	RBPmap
1088	chr8:17644891	gguaguag	gguaggag	4.262	1.01e-05	HNRNPA2B1	4.99568	MTUS1	MTUS1:E003	RBPmap
6	chr6:41941772	rygcgcb	ccgcccg	4.257	1.04e-05	RBM8A	4.98297	CCND3	CCND3:E029	RBPmap
13	chr6:41941779	rygcgcb	ccgcccg	4.257	1.04e-05	RBM8A	4.98297	CCND3	CCND3:E029	RBPmap
17	chr8:141001302	gcgcgg	gcgcgc	4.256	1.04e-05	RBM4B	4.98297	PTK2	PTK2:E150	RBPmap
1	chr8:17675988	rcahaca	acaaaua	4.253	1.05e-05	HNRPLL	4.97881	MTUS1	MTUS1:E031	RBPmap
160	chr8:140735446	amayama	auacaca	4.253	1.05e-05	HNRNPL	4.97881	PTK2	PTK2:E051	RBPmap
82	chr7:105146574	rcahaca	ccacaca	4.253	1.05e-05	HNRPLL	4.97881	SRPK2	SRPK2:E028	RBPmap
10	chr7:105203742	gukgykg	guggagg	4.246	1.09e-05	HNRNPF	4.96257	SRPK2	SRPK2:E040	RBPmap
177	chr3:48693697	caacaca	ccacaca	4.243	1.1e-05	IGF2BP2	4.95861	IP6K2	IP6K2:E019	RBPmap
82	chr7:105146574	acacaca	ccacaca	4.241	1.11e-05	hnRNPLL	4.95468	SRPK2	SRPK2:E028	CisRBP
79	chr14:21263745	ugugukk	ugugugu	4.237	1.13e-05	BRUNOL5	4.94692	HNRNPC	HNRNPC:E060	RBPmap
81	chr14:21263747	ugugukk	ugugugu	4.237	1.13e-05	BRUNOL5	4.94692	HNRNPC	HNRNPC:E060	RBPmap
23	chr8:140744790	aaaaaar	aaaaaaa	4.236	1.14e-05	ABPC4	4.9431	PTK2	PTK2:E062	RBPmap
24	chr8:140744791	aaaaaar	aaaaaaa	4.236	1.14e-05	ABPC4	4.9431	PTK2	PTK2:E062	RBPmap
25	chr8:140744792	aaaaaar	aaaaaaa	4.236	1.14e-05	ABPC4	4.9431	PTK2	PTK2:E062	RBPmap
26	chr8:140744793	aaaaaar	aaaaaaa	4.236	1.14e-05	ABPC4	4.9431	PTK2	PTK2:E062	RBPmap
27	chr8:140744794	aaaaaar	aaaaaaa	4.236	1.14e-05	ABPC4	4.9431	PTK2	PTK2:E062	RBPmap
28	chr8:140744795	aaaaaar	aaaaaaa	4.236	1.14e-05	ABPC4	4.9431	PTK2	PTK2:E062	RBPmap
29	chr8:140744796	aaaaaar	aaaaaaa	4.236	1.14e-05	ABPC4	4.9431	PTK2	PTK2:E062	RBPmap
30	chr8:140744797	aaaaaar	aaaaaaa	4.236	1.14e-05	ABPC4	4.9431	PTK2	PTK2:E062	RBPmap
3	chr8:17675990	amayama	aaauaca	4.227	1.18e-05	HNRNPL	4.92812	MTUS1	MTUS1:E031	RBPmap
7	chr8:17721996	aaaaaar	aaaaaaa	4.227	1.18e-05	ABPC4	4.92812	MTUS1	MTUS1:E052	RBPmap
8	chr8:17721997	aaaaaar	aaaaaaa	4.227	1.18e-05	ABPC4	4.92812	MTUS1	MTUS1:E052	RBPmap
9	chr8:17721998	aaaaaar	aaaaaaa	4.227	1.18e-05	ABPC4	4.92812	MTUS1	MTUS1:E052	RBPmap
10	chr8:17721999	aaaaaar	aaaaaaa	4.227	1.18e-05	ABPC4	4.92812	MTUS1	MTUS1:E052	RBPmap
11	chr8:17722000	aaaaaar	aaaaaaa	4.227	1.18e-05	ABPC4	4.92812	MTUS1	MTUS1:E052	RBPmap
12	chr8:17722001	aaaaaar	aaaaaaa	4.227	1.18e-05	ABPC4	4.92812	MTUS1	MTUS1:E052	RBPmap
13	chr8:17722002	aaaaaar	aaaaaaa	4.227	1.18e-05	ABPC4	4.92812	MTUS1	MTUS1:E052	RBPmap
84	chr7:105146576	amayama	acacaca	4.227	1.18e-05	HNRNPL	4.92812	SRPK2	SRPK2:E028	RBPmap
1104	chr14:21210239	acacaaa	acacaaa	4.225	1.19e-05	ENSG00000215042	4.92445	HNRNPC	HNRNPC:E001	CisRBP
1104	chr14:21210239	acacrav	acacaaa	4.225	1.19e-05	HNRNPL	4.92445	HNRNPC	HNRNPC:E001	RBPmap
98	chr14:21262866	rauaaam	aauaaaa	4.224	1.2e-05	KHDRBS2	4.92082	HNRNPC	HNRNPC:E055	RBPmap
112	chr14:21262880	rauaaam	aauaaaa	4.224	1.2e-05	KHDRBS2	4.92082	HNRNPC	HNRNPC:E055	RBPmap
83	chr7:105146575	uacaca	cacaca	4.224	1.2e-05	HNRNPL	4.92082	SRPK2	SRPK2:E028	RBPmap
85	chr7:105146577	uacaca	cacaca	4.224	1.2e-05	HNRNPL	4.92082	SRPK2	SRPK2:E028	RBPmap
122	chr16:1385329	gckgghm	gcuggag	4.222	1.21e-05	SAMD4A	4.91721	UNKL	UNKL:E026	RBPmap
114	chr6:41936309	ccaaccc	caaaccc	4.221	1.22e-05	hnRNPK	4.91364	CCND3	CCND3:E007	CisRBP
122	chr6:41936317	ccaaccc	ccacccc	4.221	1.22e-05	hnRNPK	4.91364	CCND3	CCND3:E007	CisRBP
5	chr8:141001290	gcgcgcg	cggcgcg	4.218	1.23e-05	PPRC1	4.91009	PTK2	PTK2:E150	CisRBP
94	chr6:41941613	gcgcgu	gcgcgu	4.219	1.23e-05	RBM4	4.91009	CCND3	CCND3:E027	RBPmap
1263	chr8:17645066	auuagu	guuagu	4.218	1.23e-05	HNRNPA0	4.91009	MTUS1	MTUS1:E003	RBPmap
5	chr8:141001290	ssgcgcs	cggcgcg	4.218	1.23e-05	RC1	4.91009	PTK2	PTK2:E150	RBPmap
352	chr11:14359114	gcgcgu	gcgcgc	4.219	1.23e-05	RBM4	4.91009	RRAS2	RRAS2:E023	RBPmap
45	chr16:1414659	cgccg	cgccg	4.21	1.28e-05	EIF4G2	4.89279	UNKL	UNKL:E046	RBPmap
54	chr16:1414668	cgccg	cgccg	4.21	1.28e-05	EIF4G2	4.89279	UNKL	UNKL:E046	RBPmap
226	chr7:105116602	hauaua	uauaua	4.208	1.29e-05	RBMS3	4.88941	SRPK2	SRPK2:E005	RBPmap
14	chr16:1414711	gcgcgu	gcgcgc	4.205	1.31e-05	RBM4	4.88273	UNKL	UNKL:E049	RBPmap
5	chr8:141001290	rygcgcb	cggcgcg	4.203	1.32e-05	RBM8A	4.87943	PTK2	PTK2:E150	RBPmap
3	chr7:105116379	aaaaaar	aaaaaaa	4.2	1.33e-05	ABPC4	4.87615	SRPK2	SRPK2:E005	RBPmap
4	chr7:105116380	aaaaaar	aaaaaaa	4.2	1.33e-05	ABPC4	4.87615	SRPK2	SRPK2:E005	RBPmap
5	chr7:105116381	aaaaaar	aaaaaaa	4.2	1.33e-05	ABPC4	4.87615	SRPK2	SRPK2:E005	RBPmap
6	chr7:105116382	aaaaaar	aaaaaaa	4.2	1.33e-05	ABPC4	4.87615	SRPK2	SRPK2:E005	RBPmap
7	chr7:105116383	aaaaaar	aaaaaaa	4.2	1.33e-05	ABPC4	4.87615	SRPK2	SRPK2:E005	RBPmap
156	chr1:52992953	hauaua	uauaua	4.198	1.35e-05	RBMS3	4.86967	RRAS2	RRAS2:E005	RBPmap
42	chr16:1413887	guaguagu	ggagcagu	4.197	1.35e-05	HNRNPA1	4.86967	UNKL	UNKL:E043	RBPmap
99	chr14:21262867	auaaaav	auaaaaa	4.196	1.36e-05	KHDRBS1	4.86646	HNRNPC	HNRNPC:E055	RBPmap
26	chr8:17723266	auuagu	auuagg	4.192	1.38e-05	HNRNPA0	4.86012	MTUS1	MTUS1:E056	RBPmap
24	chr8:141001309	cgcgc	ugcgc	4.193	1.38e-05	FUS	4.86012	PTK2	PTK2:E150	RBPmap
11	chr16:1414708	ssagcgm	gcagcgc	4.192	1.38e-05	ZC3H10	4.86012	UNKL	UNKL:E049	RBPmap
23	chr8:140744790	aaaaaaa	aaaaaaa	4.189	1.4e-05	PABPC4	4.85387	PTK2	PTK2:E062	CisRBP
24	chr8:140744791	aaaaaaa	aaaaaaa	4.189	1.4e-05	PABPC4	4.85387	PTK2	PTK2:E062	CisRBP
25	chr8:140744792	aaaaaaa	aaaaaaa	4.189	1.4e-05	PABPC4	4.85387	PTK2	PTK2:E062	CisRBP
26	chr8:140744793	aaaaaaa	aaaaaaa	4.189	1.4e-05	PABPC4	4.85387	PTK2	PTK2:E062	CisRBP
27	chr8:140744794	aaaaaaa	aaaaaaa	4.189	1.4e-05	PABPC4	4.85387	PTK2	PTK2:E062	CisRBP
28	chr8:140744795	aaaaaaa	aaaaaaa	4.189	1.4e-05	PABPC4	4.85387	PTK2	PTK2:E062	CisRBP
29	chr8:140744796	aaaaaaa	aaaaaaa	4.189	1.4e-05	PABPC4	4.85387	PTK2	PTK2:E062	CisRBP
30	chr8:140744797	aaaaaaa	aaaaaaa	4.189	1.4e-05	PABPC4	4.85387	PTK2	PTK2:E062	CisRBP
14	chr14:21211320	amayama	acacaaa	4.187	1.41e-05	HNRNPL	4.85078	HNRNPC	HNRNPC:E018	RBPmap
41	chr14:21236413	agacgww	agacgua	4.188	1.41e-05	ANKHD1	4.85078	HNRNPC	HNRNPC:E049	RBPmap
113	chr14:21262881	auaaaav	auaaaaa	4.186	1.42e-05	KHDRBS1	4.84771	HNRNPC	HNRNPC:E055	RBPmap
200	chr14:21263192	uucauaa	aucauca	4.183	1.44e-05	NOVA1	4.84164	HNRNPC	HNRNPC:E056	RBPmap
12	chr7:105203744	gragga	ggagga	4.183	1.44e-05	SRSF1	4.84164	SRPK2	SRPK2:E040	RBPmap
15	chr7:105203747	gragga	ggagga	4.183	1.44e-05	SRSF1	4.84164	SRPK2	SRPK2:E040	RBPmap
18	chr7:105203750	gragga	ggagga	4.183	1.44e-05	SRSF1	4.84164	SRPK2	SRPK2:E040	RBPmap
7	chr8:17721996	aaaaaaa	aaaaaaa	4.18	1.46e-05	PABPC4	4.83565	MTUS1	MTUS1:E052	CisRBP
8	chr8:17721997	aaaaaaa	aaaaaaa	4.18	1.46e-05	PABPC4	4.83565	MTUS1	MTUS1:E052	CisRBP
9	chr8:17721998	aaaaaaa	aaaaaaa	4.18	1.46e-05	PABPC4	4.83565	MTUS1	MTUS1:E052	CisRBP
10	chr8:17721999	aaaaaaa	aaaaaaa	4.18	1.46e-05	PABPC4	4.83565	MTUS1	MTUS1:E052	CisRBP
11	chr8:17722000	aaaaaaa	aaaaaaa	4.18	1.46e-05	PABPC4	4.83565	MTUS1	MTUS1:E052	CisRBP
12	chr8:17722001	aaaaaaa	aaaaaaa	4.18	1.46e-05	PABPC4	4.83565	MTUS1	MTUS1:E052	CisRBP
13	chr8:17722002	aaaaaaa	aaaaaaa	4.18	1.46e-05	PABPC4	4.83565	MTUS1	MTUS1:E052	CisRBP
80	chr14:21263746	kkguguk	gugugug	4.179	1.46e-05	RBM38	4.83565	HNRNPC	HNRNPC:E060	RBPmap
1086	chr8:17644889	uagkwwr	uagguag	4.179	1.46e-05	DAZAP1	4.83565	MTUS1	MTUS1:E003	RBPmap
3	chr8:17675990	amahwca	aaauaca	4.179	1.46e-05	IGF2BP3	4.83565	MTUS1	MTUS1:E031	RBPmap
216	chr7:105116592	kauauas	aauauac	4.178	1.47e-05	RBMS1	4.83268	SRPK2	SRPK2:E005	RBPmap
72	chr14:21263654	aaaaaar	aaaaaaa	4.173	1.5e-05	ABPC4	4.82391	HNRNPC	HNRNPC:E059	RBPmap
73	chr14:21263655	aaaaaar	aaaaaaa	4.173	1.5e-05	ABPC4	4.82391	HNRNPC	HNRNPC:E059	RBPmap
74	chr14:21263656	aaaaaar	aaaaaaa	4.173	1.5e-05	ABPC4	4.82391	HNRNPC	HNRNPC:E059	RBPmap
75	chr14:21263657	aaaaaar	aaaaaaa	4.173	1.5e-05	ABPC4	4.82391	HNRNPC	HNRNPC:E059	RBPmap
176	chr14:21210788	uacaca	cacaca	4.171	1.52e-05	HNRNPL	4.81816	HNRNPC	HNRNPC:E007	RBPmap
9	chr3:48689546	uacaca	cacaca	4.171	1.52e-05	HNRNPL	4.81816	IP6K2	IP6K2:E002	RBPmap
11	chr3:48689548	uacaca	cacaca	4.171	1.52e-05	HNRNPL	4.81816	IP6K2	IP6K2:E002	RBPmap
173	chr14:21263165	aacaucd	aaaauca	4.169	1.53e-05	YBX1	4.81531	HNRNPC	HNRNPC:E056	RBPmap
15	chr6:41941781	ssgcgcs	gcccgcg	4.167	1.54e-05	RC1	4.81248	CCND3	CCND3:E029	RBPmap
191	chr14:21263183	uucauaa	aucauca	4.167	1.54e-05	NOVA1	4.81248	HNRNPC	HNRNPC:E056	RBPmap
194	chr14:21263186	uucauaa	aucauca	4.167	1.54e-05	NOVA1	4.81248	HNRNPC	HNRNPC:E056	RBPmap
197	chr14:21263189	uucauaa	aucauca	4.167	1.54e-05	NOVA1	4.81248	HNRNPC	HNRNPC:E056	RBPmap
1263	chr8:17645066	auuaguu	guuaguu	4.164	1.56e-05	UNK	4.80688	MTUS1	MTUS1:E003	RBPmap
50	chr7:105306485	aaaaaar	aaaaaaa	4.164	1.56e-05	ABPC4	4.80688	SRPK2	SRPK2:E046	RBPmap
51	chr7:105306486	aaaaaar	aaaaaaa	4.164	1.56e-05	ABPC4	4.80688	SRPK2	SRPK2:E046	RBPmap
52	chr7:105306487	aaaaaar	aaaaaaa	4.164	1.56e-05	ABPC4	4.80688	SRPK2	SRPK2:E046	RBPmap
53	chr7:105306488	aaaaaar	aaaaaaa	4.164	1.56e-05	ABPC4	4.80688	SRPK2	SRPK2:E046	RBPmap
1263	chr8:140669687	gacaga	gagaga	4.163	1.57e-05	CNOT4	4.8041	PTK2	PTK2:E019	RBPmap
16	chr3:48689553	acgca	acgca	4.157	1.61e-05	RBM45	4.79317	IP6K2	IP6K2:E002	RBPmap
53	chr3:48693232	uguaag	uguaag	4.157	1.61e-05	SFPQ	4.79317	IP6K2	IP6K2:E012	RBPmap
206	chr14:21263198	aucaacg	accauca	4.156	1.62e-05	SRSF3	4.79048	HNRNPC	HNRNPC:E056	CisRBP
1589	chr8:17645392	ugauu	ugauu	4.156	1.62e-05	RBM47	4.79048	MTUS1	MTUS1:E003	RBPmap
1593	chr8:17645396	ugauu	ugauu	4.156	1.62e-05	RBM47	4.79048	MTUS1	MTUS1:E003	RBPmap
1597	chr8:17645400	ugauu	ugauu	4.156	1.62e-05	RBM47	4.79048	MTUS1	MTUS1:E003	RBPmap
15	chr8:141001328	gcgcgcg	gcgcgcg	4.154	1.63e-05	PPRC1	4.78781	PTK2	PTK2:E151	CisRBP
15	chr8:141001328	ssgcgcs	gcgcgcg	4.154	1.63e-05	RC1	4.78781	PTK2	PTK2:E151	RBPmap
32	chr8:140771311	raaaacm	gaaaaca	4.148	1.68e-05	ABPC3	4.77469	PTK2	PTK2:E085	RBPmap
114	chr6:41936309	ccawmcc	caaaccc	4.145	1.7e-05	HNRNPK	4.76955	CCND3	CCND3:E007	RBPmap
122	chr6:41936317	ccawmcc	ccacccc	4.145	1.7e-05	HNRNPK	4.76955	CCND3	CCND3:E007	RBPmap
101	chr14:21262869	aaaaaar	aaaaaaa	4.145	1.7e-05	ABPC4	4.76955	HNRNPC	HNRNPC:E055	RBPmap
115	chr14:21262883	aaaaaar	aaaaaaa	4.145	1.7e-05	ABPC4	4.76955	HNRNPC	HNRNPC:E055	RBPmap
116	chr14:21262884	aaaaaar	aaaaaaa	4.145	1.7e-05	ABPC4	4.76955	HNRNPC	HNRNPC:E055	RBPmap
1279	chr8:140669703	uacaca	cacaca	4.145	1.7e-05	HNRNPL	4.76955	PTK2	PTK2:E019	RBPmap
157	chr8:140735443	uacaca	cacaua	4.145	1.7e-05	HNRNPL	4.76955	PTK2	PTK2:E051	RBPmap
72	chr14:21263654	aaaaaaa	aaaaaaa	4.144	1.71e-05	PABPC4	4.767	HNRNPC	HNRNPC:E059	CisRBP
73	chr14:21263655	aaaaaaa	aaaaaaa	4.144	1.71e-05	PABPC4	4.767	HNRNPC	HNRNPC:E059	CisRBP
74	chr14:21263656	aaaaaaa	aaaaaaa	4.144	1.71e-05	PABPC4	4.767	HNRNPC	HNRNPC:E059	CisRBP
75	chr14:21263657	aaaaaaa	aaaaaaa	4.144	1.71e-05	PABPC4	4.767	HNRNPC	HNRNPC:E059	CisRBP
3	chr7:105116379	aaaaaaa	aaaaaaa	4.144	1.71e-05	PABPC4	4.767	SRPK2	SRPK2:E005	CisRBP
4	chr7:105116380	aaaaaaa	aaaaaaa	4.144	1.71e-05	PABPC4	4.767	SRPK2	SRPK2:E005	CisRBP
5	chr7:105116381	aaaaaaa	aaaaaaa	4.144	1.71e-05	PABPC4	4.767	SRPK2	SRPK2:E005	CisRBP
6	chr7:105116382	aaaaaaa	aaaaaaa	4.144	1.71e-05	PABPC4	4.767	SRPK2	SRPK2:E005	CisRBP
7	chr7:105116383	aaaaaaa	aaaaaaa	4.144	1.71e-05	PABPC4	4.767	SRPK2	SRPK2:E005	CisRBP
15	chr3:48694540	auaaaav	auaaaaa	4.144	1.71e-05	KHDRBS1	4.767	IP6K2	IP6K2:E029	RBPmap
25	chr3:48694550	auaaaav	auaaaaa	4.144	1.71e-05	KHDRBS1	4.767	IP6K2	IP6K2:E029	RBPmap
52	chr8:17645713	chuuuuu	cuuuuuu	4.143	1.71e-05	CPEB2	4.767	MTUS1	MTUS1:E004	RBPmap
1253	chr8:17645056	uaguwrg	caguuag	4.136	1.77e-05	MSI1	4.75203	MTUS1	MTUS1:E003	RBPmap
367	chr8:140658266	aaaaaar	aaaaaaa	4.136	1.77e-05	ABPC4	4.75203	PTK2	PTK2:E001	RBPmap
368	chr8:140658267	aaaaaar	aaaaaaa	4.136	1.77e-05	ABPC4	4.75203	PTK2	PTK2:E001	RBPmap
369	chr8:140658268	aaaaaar	aaaaaaa	4.136	1.77e-05	ABPC4	4.75203	PTK2	PTK2:E001	RBPmap
40	chr8:17645701	chuuuuu	cuuuuuu	4.133	1.79e-05	CPEB2	4.74715	MTUS1	MTUS1:E004	RBPmap
30	chr7:105389273	cgcgc	ugcgc	4.133	1.79e-05	FUS	4.74715	SRPK2	SRPK2:E051	RBPmap
174	chr14:21210786	uacaca	aacaca	4.132	1.8e-05	HNRNPL	4.74473	HNRNPC	HNRNPC:E007	RBPmap
1279	chr14:21210414	kurrukk	guugugu	4.13	1.81e-05	SFPQ	4.74232	HNRNPC	HNRNPC:E001	RBPmap
13	chr11:14337013	aacaucd	aacagca	4.13	1.81e-05	YBX1	4.74232	RRAS2	RRAS2:E017	RBPmap
320	chr17:76039870	gguugguu	gguuggcu	4.127	1.84e-05	HNRNP	4.73518	SRP68	SRP68:E005	RBPmap
32	chr8:140771311	gaaaacc	gaaaaca	4.125	1.85e-05	PABPC3	4.73283	PTK2	PTK2:E085	CisRBP
296	chr7:105142303	aucaacg	uucauca	4.125	1.85e-05	SRSF3	4.73283	SRPK2	SRPK2:E023	CisRBP
156	chr1:52992953	uauauag	uauauag	4.125	1.85e-05	DAZAP1	4.73283	RRAS2	RRAS2:E005	RBPmap
226	chr7:105116602	kauauas	uauauau	4.123	1.87e-05	RBMS1	4.72816	SRPK2	SRPK2:E005	RBPmap
347	chr7:105143677	kauauas	uauauac	4.123	1.87e-05	RBMS1	4.72816	SRPK2	SRPK2:E026	RBPmap
6	chr8:140718361	agcagc	ugcagc	4.122	1.88e-05	SRSF8	4.72584	PTK2	PTK2:E047	RBPmap
15	chr8:140718370	agcagc	ugcagc	4.122	1.88e-05	SRSF8	4.72584	PTK2	PTK2:E047	RBPmap
16	chr14:21211322	amayama	acaaaca	4.12	1.89e-05	HNRNPL	4.72354	HNRNPC	HNRNPC:E018	RBPmap
14	chr3:48689551	amayama	acacgca	4.12	1.89e-05	HNRNPL	4.72354	IP6K2	IP6K2:E002	RBPmap
101	chr11:14364491	ugcaugc	ugcaugc	4.118	1.91e-05	A2BP1	4.71897	RRAS2	RRAS2:E026	CisRBP
782	chr16:1365793	aaaaaaa	aaaaaaa	4.118	1.91e-05	PABPC4	4.71897	UNKL	UNKL:E006	CisRBP
783	chr16:1365794	aaaaaaa	aaaaaaa	4.118	1.91e-05	PABPC4	4.71897	UNKL	UNKL:E006	CisRBP
784	chr16:1365795	aaaaaaa	aaaaaaa	4.118	1.91e-05	PABPC4	4.71897	UNKL	UNKL:E006	CisRBP
15	chr8:17676002	uacaca	uacaua	4.118	1.91e-05	HNRNPL	4.71897	MTUS1	MTUS1:E031	RBPmap
101	chr11:14364491	wgcaugm	ugcaugc	4.118	1.91e-05	RBFOX1	4.71897	RRAS2	RRAS2:E026	RBPmap
782	chr16:1365793	aaaaaar	aaaaaaa	4.118	1.91e-05	ABPC4	4.71897	UNKL	UNKL:E006	RBPmap
783	chr16:1365794	aaaaaar	aaaaaaa	4.118	1.91e-05	ABPC4	4.71897	UNKL	UNKL:E006	RBPmap
784	chr16:1365795	aaaaaar	aaaaaaa	4.118	1.91e-05	ABPC4	4.71897	UNKL	UNKL:E006	RBPmap
101	chr14:21262869	aaaaaaa	aaaaaaa	4.117	1.92e-05	PABPC4	4.7167	HNRNPC	HNRNPC:E055	CisRBP
115	chr14:21262883	aaaaaaa	aaaaaaa	4.117	1.92e-05	PABPC4	4.7167	HNRNPC	HNRNPC:E055	CisRBP
116	chr14:21262884	aaaaaaa	aaaaaaa	4.117	1.92e-05	PABPC4	4.7167	HNRNPC	HNRNPC:E055	CisRBP
13	chr11:14337013	aacauca	aacagca	4.117	1.92e-05	CSDA	4.7167	RRAS2	RRAS2:E017	CisRBP
173	chr14:21263165	aacauca	aaaauca	4.115	1.94e-05	CSDA	4.7122	HNRNPC	HNRNPC:E056	CisRBP
47	chr7:105117572	caacaca	caacaca	4.114	1.94e-05	IGF2BP2	4.7122	SRPK2	SRPK2:E012	RBPmap
119	chr16:1385326	cacgc	cacgc	4.115	1.94e-05	HNRNPK	4.7122	UNKL	UNKL:E026	RBPmap
2	chr3:48694873	acacrav	acacaac	4.113	1.95e-05	HNRNPL	4.70997	IP6K2	IP6K2:E035	RBPmap
173	chr14:21263165	aacauca	aaaauca	4.112	1.96e-05	YB-1	4.70774	HNRNPC	HNRNPC:E056	CisRBP
13	chr11:14337013	aacauca	aacagca	4.112	1.96e-05	YB-1	4.70774	RRAS2	RRAS2:E017	CisRBP
113	chr7:105142449	cuuucu	cuuucu	4.112	1.96e-05	TBP3	4.70774	SRPK2	SRPK2:E024	RBPmap
68	chr8:17684421	uukruuu	uugguuu	4.11	1.98e-05	HuR	4.70333	MTUS1	MTUS1:E039	RBPmap
50	chr7:105306485	aaaaaaa	aaaaaaa	4.108	2e-05	PABPC4	4.69897	SRPK2	SRPK2:E046	CisRBP
51	chr7:105306486	aaaaaaa	aaaaaaa	4.108	2e-05	PABPC4	4.69897	SRPK2	SRPK2:E046	CisRBP
52	chr7:105306487	aaaaaaa	aaaaaaa	4.108	2e-05	PABPC4	4.69897	SRPK2	SRPK2:E046	CisRBP
53	chr7:105306488	aaaaaaa	aaaaaaa	4.108	2e-05	PABPC4	4.69897	SRPK2	SRPK2:E046	CisRBP
79	chr14:21263745	kgugukk	ugugugu	4.108	2e-05	BRUNOL4	4.69897	HNRNPC	HNRNPC:E060	RBPmap
81	chr14:21263747	kgugukk	ugugugu	4.108	2e-05	BRUNOL4	4.69897	HNRNPC	HNRNPC:E060	RBPmap
90	chr3:48694961	hggagwa	aggagag	4.108	2e-05	LIN28A	4.69897	IP6K2	IP6K2:E035	RBPmap
1277	chr8:140669701	uacaca	gacaca	4.105	2.02e-05	HNRNPL	4.69465	PTK2	PTK2:E019	RBPmap
899	chr16:1364104	uacaca	uacaca	4.105	2.02e-05	HNRNPL	4.69465	UNKL	UNKL:E002	RBPmap
15	chr6:41941781	gcgcgcg	gcccgcg	4.101	2.06e-05	PPRC1	4.68613	CCND3	CCND3:E029	CisRBP
2	chr3:48694873	acacaaa	acacaac	4.099	2.07e-05	ENSG00000215042	4.68403	IP6K2	IP6K2:E035	CisRBP
296	chr14:21263288	aaaaaar	aaaaaaa	4.1	2.07e-05	ABPC4	4.68403	HNRNPC	HNRNPC:E056	RBPmap
297	chr14:21263289	aaaaaar	aaaaaaa	4.1	2.07e-05	ABPC4	4.68403	HNRNPC	HNRNPC:E056	RBPmap
298	chr14:21263290	aaaaaar	aaaaaaa	4.1	2.07e-05	ABPC4	4.68403	HNRNPC	HNRNPC:E056	RBPmap
29	chr8:17674865	aaaaaar	aaaaaaa	4.1	2.07e-05	ABPC4	4.68403	MTUS1	MTUS1:E027	RBPmap
30	chr8:17674866	aaaaaar	aaaaaaa	4.1	2.07e-05	ABPC4	4.68403	MTUS1	MTUS1:E027	RBPmap
31	chr8:17674867	aaaaaar	aaaaaaa	4.1	2.07e-05	ABPC4	4.68403	MTUS1	MTUS1:E027	RBPmap
120	chr6:41936315	ccccacccc	ccccacccc	4.098	2.08e-05	CBP2	4.68194	CCND3	CCND3:E007	RBPmap
1259	chr8:140669683	gacaga	gauaga	4.098	2.08e-05	CNOT4	4.68194	PTK2	PTK2:E019	RBPmap
85	chr3:48694956	gragga	gaagga	4.097	2.09e-05	SRSF1	4.67985	IP6K2	IP6K2:E035	RBPmap
9	chr8:141001294	rygcgcb	gcgggcc	4.095	2.11e-05	RBM8A	4.67572	PTK2	PTK2:E150	RBPmap
1383	chr14:21210518	rauaaam	aauaaaa	4.094	2.12e-05	KHDRBS2	4.67366	HNRNPC	HNRNPC:E001	RBPmap
202	chr6:41941721	gcgcgg	gcgggg	4.093	2.13e-05	RBM4B	4.67162	CCND3	CCND3:E027	RBPmap
5	chr16:1414060	amayama	aaacaca	4.093	2.13e-05	HNRNPL	4.67162	UNKL	UNKL:E045	RBPmap
367	chr8:140658266	aaaaaaa	aaaaaaa	4.09	2.16e-05	PABPC4	4.66555	PTK2	PTK2:E001	CisRBP
368	chr8:140658267	aaaaaaa	aaaaaaa	4.09	2.16e-05	PABPC4	4.66555	PTK2	PTK2:E001	CisRBP
369	chr8:140658268	aaaaaaa	aaaaaaa	4.09	2.16e-05	PABPC4	4.66555	PTK2	PTK2:E001	CisRBP
54	chr7:105388844	acgacg	ggcgac	4.09	2.16e-05	SRSF7	4.66555	SRPK2	SRPK2:E048	RBPmap
21	chr8:140744788	araaaam	agaaaaa	4.088	2.18e-05	ABPC1	4.66154	PTK2	PTK2:E062	RBPmap
21	chr8:140744788	araaaam	agaaaaa	4.088	2.18e-05	SART3	4.66154	PTK2	PTK2:E062	RBPmap
25	chr8:140770824	agagaaa	agagaaa	4.084	2.21e-05	Fusip1	4.65561	PTK2	PTK2:E084	CisRBP
25	chr8:140770824	agagavm	agagaaa	4.084	2.21e-05	SRSF10	4.65561	PTK2	PTK2:E084	RBPmap
185	chr14:21263177	uucauaa	gucauua	4.083	2.22e-05	NOVA1	4.65365	HNRNPC	HNRNPC:E056	RBPmap
226	chr17:76041204	uaaua	uaaua	4.082	2.23e-05	ZFP36	4.6517	SRP68	SRP68:E009	RBPmap
16	chr16:1414713	gcgcgu	gcgcau	4.082	2.23e-05	RBM4	4.6517	UNKL	UNKL:E049	RBPmap
177	chr14:21210789	amayama	acacaua	4.08	2.25e-05	HNRNPL	4.64782	HNRNPC	HNRNPC:E007	RBPmap
152	chr1:52992949	uguanaua	uguguaua	4.08	2.25e-05	UM2	4.64782	RRAS2	RRAS2:E005	RBPmap
98	chr3:48694969	garggwr	gagggaa	4.077	2.28e-05	RBM5	4.64207	IP6K2	IP6K2:E035	RBPmap
81	chr3:48694952	akgavmr	aggagaa	4.077	2.28e-05	SRSF9	4.64207	IP6K2	IP6K2:E035	RBPmap
164	chr8:140735450	acacag	acacac	4.077	2.28e-05	CNOT4	4.64207	PTK2	PTK2:E051	RBPmap
296	chr14:21263288	aaaaaaa	aaaaaaa	4.072	2.33e-05	PABPC4	4.63264	HNRNPC	HNRNPC:E056	CisRBP
297	chr14:21263289	aaaaaaa	aaaaaaa	4.072	2.33e-05	PABPC4	4.63264	HNRNPC	HNRNPC:E056	CisRBP
298	chr14:21263290	aaaaaaa	aaaaaaa	4.072	2.33e-05	PABPC4	4.63264	HNRNPC	HNRNPC:E056	CisRBP
124	chr11:14358380	rygcgcb	gcgcgcg	4.068	2.37e-05	RBM8A	4.62525	RRAS2	RRAS2:E022	RBPmap
9	chr7:105116385	raaaacm	aaaaacc	4.068	2.37e-05	ABPC3	4.62525	SRPK2	SRPK2:E005	RBPmap
3	chr16:1414058	amayama	acaaaca	4.067	2.38e-05	HNRNPL	4.62342	UNKL	UNKL:E045	RBPmap
97	chr3:48694968	gragga	ggaggg	4.065	2.4e-05	SRSF1	4.61979	IP6K2	IP6K2:E035	RBPmap
217	chr7:105143300	uuuuuuuuu	uuuucuuuu	4.065	2.4e-05	RBM24	4.61979	SRPK2	SRPK2:E025	RBPmap
13	chr8:141001298	gcgcgcg	gcccgcg	4.064	2.41e-05	PPRC1	4.61798	PTK2	PTK2:E150	CisRBP
85	chr3:48694956	garggwr	gaaggag	4.064	2.41e-05	RBM5	4.61798	IP6K2	IP6K2:E035	RBPmap
13	chr8:141001298	ssgcgcs	gcccgcg	4.064	2.41e-05	RC1	4.61798	PTK2	PTK2:E150	RBPmap
113	chr7:105142449	cuuucu	cuuucu	4.062	2.43e-05	TB3	4.61439	SRPK2	SRPK2:E024	RBPmap
9	chr16:1414729	cgcgc	ggcgc	4.06	2.45e-05	FUS	4.61083	UNKL	UNKL:E050	RBPmap
21	chr8:140744788	agaaaaa	agaaaaa	4.058	2.47e-05	PABPC1	4.6073	PTK2	PTK2:E062	CisRBP
9	chr7:105116385	gaaaacc	aaaaacc	4.057	2.49e-05	PABPC3	4.6038	SRPK2	SRPK2:E005	CisRBP
168	chr3:48693688	caacaca	caaaaca	4.057	2.49e-05	IGF2BP2	4.6038	IP6K2	IP6K2:E019	RBPmap
162	chr8:140735448	caacaca	acacaca	4.057	2.49e-05	IGF2BP2	4.6038	PTK2	PTK2:E051	RBPmap
209	chr6:41941728	gcgcgu	gcgggu	4.055	2.51e-05	RBM4	4.60033	CCND3	CCND3:E027	RBPmap
54	chr14:21209189	kauauas	uauacag	4.055	2.51e-05	RBMS1	4.60033	HNRNPC	HNRNPC:E001	RBPmap
15	chr8:141001300	gcgcgu	ccgcgc	4.055	2.51e-05	RBM4	4.60033	PTK2	PTK2:E150	RBPmap
29	chr8:17674865	aaaaaaa	aaaaaaa	4.054	2.52e-05	PABPC4	4.5986	MTUS1	MTUS1:E027	CisRBP
30	chr8:17674866	aaaaaaa	aaaaaaa	4.054	2.52e-05	PABPC4	4.5986	MTUS1	MTUS1:E027	CisRBP
31	chr8:17674867	aaaaaaa	aaaaaaa	4.054	2.52e-05	PABPC4	4.5986	MTUS1	MTUS1:E027	CisRBP
10	chr14:21211316	amayama	acagaca	4.053	2.53e-05	HNRNPL	4.59688	HNRNPC	HNRNPC:E018	RBPmap
16	chr3:48689553	amayama	acgcaca	4.053	2.53e-05	HNRNPL	4.59688	IP6K2	IP6K2:E002	RBPmap
1650	chr8:17645453	uacaca	uacaca	4.053	2.53e-05	HNRNPL	4.59688	MTUS1	MTUS1:E003	RBPmap
1674	chr8:17645477	uacaca	gacaca	4.053	2.53e-05	HNRNPL	4.59688	MTUS1	MTUS1:E003	RBPmap
203	chr14:21263195	aacaucd	aucacca	4.052	2.54e-05	YBX1	4.59517	HNRNPC	HNRNPC:E056	RBPmap
1278	chr8:140669702	acacag	acacac	4.051	2.55e-05	CNOT4	4.59346	PTK2	PTK2:E019	RBPmap
1280	chr8:140669704	acacag	acacaa	4.051	2.55e-05	CNOT4	4.59346	PTK2	PTK2:E019	RBPmap
44	chr8:140669779	agagaaa	agagaaa	4.048	2.58e-05	Fusip1	4.58838	PTK2	PTK2:E021	CisRBP
44	chr8:140669779	agagavm	agagaaa	4.048	2.58e-05	SRSF10	4.58838	PTK2	PTK2:E021	RBPmap
209	chr14:21263201	aucaacg	aucauaa	4.047	2.59e-05	SRSF3	4.5867	HNRNPC	HNRNPC:E056	CisRBP
15	chr14:21263325	aaaaaar	aaaaaaa	4.045	2.62e-05	ABPC4	4.5817	HNRNPC	HNRNPC:E057	RBPmap
5	chr14:21263341	aaaaaar	aaaaaaa	4.045	2.62e-05	ABPC4	4.5817	HNRNPC	HNRNPC:E058	RBPmap
162	chr8:140735448	amahwca	acacaca	4.045	2.62e-05	IGF2BP3	4.5817	PTK2	PTK2:E051	RBPmap
187	chr3:48693707	caacaca	caagaca	4.043	2.64e-05	IGF2BP2	4.5784	IP6K2	IP6K2:E019	RBPmap
1278	chr8:140669702	acacaaa	acacaca	4.042	2.65e-05	ENSG00000215042	4.57675	PTK2	PTK2:E019	CisRBP
52	chr14:21209187	kauauas	aauauac	4.041	2.66e-05	RBMS1	4.57512	HNRNPC	HNRNPC:E001	RBPmap
77	chr14:21211383	uuuycc	cuuucc	4.041	2.66e-05	CBP3	4.57512	HNRNPC	HNRNPC:E018	RBPmap
82	chr14:21211388	uuuycc	cuuucc	4.041	2.66e-05	CBP3	4.57512	HNRNPC	HNRNPC:E018	RBPmap
3	chr3:48694528	auaaaav	auaaaau	4.041	2.66e-05	KHDRBS1	4.57512	IP6K2	IP6K2:E029	RBPmap
3	chr8:17675990	vmahwca	aaauaca	4.041	2.66e-05	IGF2BP2	4.57512	MTUS1	MTUS1:E031	RBPmap
12	chr14:21211318	amayama	agacaca	4.04	2.67e-05	HNRNPL	4.57349	HNRNPC	HNRNPC:E018	RBPmap
18	chr3:48689555	rcahaca	gcacacc	4.038	2.7e-05	HNRPLL	4.56864	IP6K2	IP6K2:E002	RBPmap
1	chr7:105203733	kurrukk	guggugg	4.037	2.71e-05	SFPQ	4.56703	SRPK2	SRPK2:E040	RBPmap
16	chr8:140744783	ucaaaag	ccaaaag	4.033	2.75e-05	SF3B4	4.56067	PTK2	PTK2:E062	CisRBP
223	chr7:105143306	uuuuuuuuu	uuuuguuuu	4.032	2.77e-05	RBM24	4.55752	SRPK2	SRPK2:E025	RBPmap
1265	chr8:17645068	uagkwwr	uaguuug	4.03	2.79e-05	DAZAP1	4.5544	MTUS1	MTUS1:E003	RBPmap
105	chr8:17723938	acacrav	acacaaa	4.028	2.81e-05	HNRNPL	4.55129	MTUS1	MTUS1:E058	RBPmap
11	chr8:17723844	aaaaaar	aaaaaaa	4.027	2.82e-05	ABPC4	4.54975	MTUS1	MTUS1:E058	RBPmap
12	chr8:17723845	aaaaaar	aaaaaaa	4.027	2.82e-05	ABPC4	4.54975	MTUS1	MTUS1:E058	RBPmap
9	chr8:141001294	gcgcgu	gcgggc	4.027	2.82e-05	RBM4	4.54975	PTK2	PTK2:E150	RBPmap
96	chr14:21262864	aaaauaa	aaaauaa	4.026	2.84e-05	NUPL2	4.54668	HNRNPC	HNRNPC:E055	RBPmap
110	chr14:21262878	aaaauaa	aaaauaa	4.026	2.84e-05	NUPL2	4.54668	HNRNPC	HNRNPC:E055	RBPmap
1651	chr8:17645454	acacag	acacag	4.026	2.84e-05	CNOT4	4.54668	MTUS1	MTUS1:E003	RBPmap
324	chr17:76039874	gcuugc	ggcuug	4.026	2.84e-05	MBNL1	4.54668	SRP68	SRP68:E005	RBPmap
18	chr3:48689555	acacaca	gcacacc	4.025	2.85e-05	hnRNPLL	4.54516	IP6K2	IP6K2:E002	CisRBP
94	chr14:21262862	uaaaa	uaaaa	4.025	2.85e-05	HNRNPDL	4.54516	HNRNPC	HNRNPC:E055	RBPmap
100	chr14:21262868	uaaaa	uaaaa	4.025	2.85e-05	HNRNPDL	4.54516	HNRNPC	HNRNPC:E055	RBPmap
114	chr14:21262882	uaaaa	uaaaa	4.025	2.85e-05	HNRNPDL	4.54516	HNRNPC	HNRNPC:E055	RBPmap
171	chr1:52993139	agagavm	agagaaa	4.024	2.86e-05	SRSF10	4.54363	RRAS2	RRAS2:E007	RBPmap
49	chr11:14358305	gcgcgg	acgcgg	4.023	2.87e-05	RBM4B	4.54212	RRAS2	RRAS2:E022	RBPmap
81	chr8:17684434	uukruuu	uuuguuu	4.022	2.89e-05	HuR	4.5391	MTUS1	MTUS1:E039	RBPmap
23	chr8:140744790	araaaam	aaaaaaa	4.02	2.91e-05	ABPC1	4.53611	PTK2	PTK2:E062	RBPmap
24	chr8:140744791	araaaam	aaaaaaa	4.02	2.91e-05	ABPC1	4.53611	PTK2	PTK2:E062	RBPmap
25	chr8:140744792	araaaam	aaaaaaa	4.02	2.91e-05	ABPC1	4.53611	PTK2	PTK2:E062	RBPmap
26	chr8:140744793	araaaam	aaaaaaa	4.02	2.91e-05	ABPC1	4.53611	PTK2	PTK2:E062	RBPmap
27	chr8:140744794	araaaam	aaaaaaa	4.02	2.91e-05	ABPC1	4.53611	PTK2	PTK2:E062	RBPmap
28	chr8:140744795	araaaam	aaaaaaa	4.02	2.91e-05	ABPC1	4.53611	PTK2	PTK2:E062	RBPmap
29	chr8:140744796	araaaam	aaaaaaa	4.02	2.91e-05	ABPC1	4.53611	PTK2	PTK2:E062	RBPmap
30	chr8:140744797	araaaam	aaaaaaa	4.02	2.91e-05	ABPC1	4.53611	PTK2	PTK2:E062	RBPmap
23	chr8:140744790	araaaam	aaaaaaa	4.02	2.91e-05	SART3	4.53611	PTK2	PTK2:E062	RBPmap
24	chr8:140744791	araaaam	aaaaaaa	4.02	2.91e-05	SART3	4.53611	PTK2	PTK2:E062	RBPmap
25	chr8:140744792	araaaam	aaaaaaa	4.02	2.91e-05	SART3	4.53611	PTK2	PTK2:E062	RBPmap
26	chr8:140744793	araaaam	aaaaaaa	4.02	2.91e-05	SART3	4.53611	PTK2	PTK2:E062	RBPmap
27	chr8:140744794	araaaam	aaaaaaa	4.02	2.91e-05	SART3	4.53611	PTK2	PTK2:E062	RBPmap
28	chr8:140744795	araaaam	aaaaaaa	4.02	2.91e-05	SART3	4.53611	PTK2	PTK2:E062	RBPmap
29	chr8:140744796	araaaam	aaaaaaa	4.02	2.91e-05	SART3	4.53611	PTK2	PTK2:E062	RBPmap
30	chr8:140744797	araaaam	aaaaaaa	4.02	2.91e-05	SART3	4.53611	PTK2	PTK2:E062	RBPmap
15	chr14:21263325	aaaaaaa	aaaaaaa	4.018	2.93e-05	PABPC4	4.53313	HNRNPC	HNRNPC:E057	CisRBP
5	chr14:21263341	aaaaaaa	aaaaaaa	4.018	2.93e-05	PABPC4	4.53313	HNRNPC	HNRNPC:E058	CisRBP
105	chr8:17723938	acacaaa	acacaaa	4.014	2.98e-05	ENSG00000215042	4.52578	MTUS1	MTUS1:E058	CisRBP
101	chr11:14364491	agcaugc	ugcaugc	4.014	2.98e-05	EIF2S1	4.52578	RRAS2	RRAS2:E026	CisRBP
27	chr6:41941793	gcgcgu	gcgccg	4.014	2.98e-05	RBM4	4.52578	CCND3	CCND3:E029	RBPmap
103	chr14:21262871	vmahwca	aaaaaca	4.014	2.98e-05	IGF2BP2	4.52578	HNRNPC	HNRNPC:E055	RBPmap
177	chr14:21210789	acacaca	acacaua	4.013	3e-05	hnRNPLL	4.52288	HNRNPC	HNRNPC:E007	CisRBP
1102	chr14:21210237	amayama	aaacaca	4.013	3e-05	HNRNPL	4.52288	HNRNPC	HNRNPC:E001	RBPmap
177	chr14:21210789	rcahaca	acacaua	4.013	3e-05	HNRPLL	4.52288	HNRNPC	HNRNPC:E007	RBPmap
171	chr1:52993139	agagaaa	agagaaa	4.012	3.01e-05	Fusip1	4.52143	RRAS2	RRAS2:E007	CisRBP
236	chr14:21263228	uguaag	aguaau	4.012	3.01e-05	SFPQ	4.52143	HNRNPC	HNRNPC:E056	RBPmap
24	chr3:48694549	rauaaam	aauaaaa	4.012	3.01e-05	KHDRBS2	4.52143	IP6K2	IP6K2:E029	RBPmap
424	chr7:105143754	ugugukk	uguuugg	4.012	3.01e-05	BRUNOL5	4.52143	SRPK2	SRPK2:E026	RBPmap
13	chr16:1414710	cgcgc	agcgc	4.012	3.01e-05	FUS	4.52143	UNKL	UNKL:E049	RBPmap
15	chr16:1414712	cgcgc	cgcgc	4.012	3.01e-05	FUS	4.52143	UNKL	UNKL:E049	RBPmap
3	chr16:1414723	cgcgc	cgcgc	4.012	3.01e-05	FUS	4.52143	UNKL	UNKL:E050	RBPmap
246	chr7:105116622	uguau	uguau	4.011	3.02e-05	UM1	4.51999	SRPK2	SRPK2:E005	RBPmap
216	chr7:105116592	hauaua	aauaua	4.01	3.04e-05	RBMS3	4.51713	SRPK2	SRPK2:E005	RBPmap
54	chr8:17645715	uuuuuub	uuuuuug	4.009	3.05e-05	RALY	4.5157	MTUS1	MTUS1:E004	RBPmap
121	chr6:41936316	ccaaccc	cccaccc	4	3.17e-05	hnRNPK	4.49894	CCND3	CCND3:E007	CisRBP
12	chr14:21211318	acacaca	agacaca	4	3.17e-05	hnRNPLL	4.49894	HNRNPC	HNRNPC:E018	CisRBP
14	chr14:21211320	acacaca	acacaaa	4	3.17e-05	hnRNPLL	4.49894	HNRNPC	HNRNPC:E018	CisRBP
203	chr14:21263195	aacauca	aucacca	4	3.17e-05	CSDA	4.49894	HNRNPC	HNRNPC:E056	CisRBP
244	chr8:140675743	acacaca	acaaaca	4	3.17e-05	hnRNPLL	4.49894	PTK2	PTK2:E025	CisRBP
91	chr8:140764512	acacaca	gcaaaca	4	3.17e-05	hnRNPLL	4.49894	PTK2	PTK2:E080	CisRBP
157	chr8:141001094	gcgcgcg	ccgcgcc	4	3.17e-05	PPRC1	4.49894	PTK2	PTK2:E139	CisRBP
164	chr8:141001101	gcgcgcg	ccgcgcc	4	3.17e-05	PPRC1	4.49894	PTK2	PTK2:E139	CisRBP
5	chr16:1414060	acacaca	aaacaca	4	3.17e-05	hnRNPLL	4.49894	UNKL	UNKL:E045	CisRBP
7	chr16:1414062	acacaca	acacaga	4	3.17e-05	hnRNPLL	4.49894	UNKL	UNKL:E045	CisRBP
202	chr6:41941721	gcgcgss	gcggggc	4	3.17e-05	RBM4	4.49894	CCND3	CCND3:E027	RBPmap
4	chr6:41941770	ssgcgcs	gcccgcc	4	3.17e-05	RC1	4.49894	CCND3	CCND3:E029	RBPmap
8	chr6:41941774	ssgcgcs	gcccgcc	4	3.17e-05	RC1	4.49894	CCND3	CCND3:E029	RBPmap
45	chr6:41941811	rygcgcb	gcgcccc	4	3.17e-05	RBM8A	4.49894	CCND3	CCND3:E029	RBPmap
173	chr14:21210785	caacaca	uaacaca	4	3.17e-05	IGF2BP2	4.49894	HNRNPC	HNRNPC:E007	RBPmap
12	chr14:21211318	rcahaca	agacaca	4	3.17e-05	HNRPLL	4.49894	HNRNPC	HNRNPC:E018	RBPmap
14	chr14:21211320	rcahaca	acacaaa	4	3.17e-05	HNRPLL	4.49894	HNRNPC	HNRNPC:E018	RBPmap
103	chr14:21262871	amahwca	aaaaaca	4	3.17e-05	IGF2BP3	4.49894	HNRNPC	HNRNPC:E055	RBPmap
80	chr14:21263746	gugug	gugug	4	3.17e-05	RBM24	4.49894	HNRNPC	HNRNPC:E060	RBPmap
82	chr14:21263748	gugug	gugug	4	3.17e-05	RBM24	4.49894	HNRNPC	HNRNPC:E060	RBPmap
1712	chr8:17645515	ccccacccc	ccccacccc	4	3.17e-05	CBP2	4.49894	MTUS1	MTUS1:E003	RBPmap
27	chr8:17674863	araaaam	agaaaaa	4	3.17e-05	ABPC1	4.49894	MTUS1	MTUS1:E027	RBPmap
27	chr8:17674863	araaaam	agaaaaa	4	3.17e-05	SART3	4.49894	MTUS1	MTUS1:E027	RBPmap
244	chr8:140675743	rcahaca	acaaaca	4	3.17e-05	HNRPLL	4.49894	PTK2	PTK2:E025	RBPmap
91	chr8:140764512	rcahaca	gcaaaca	4	3.17e-05	HNRPLL	4.49894	PTK2	PTK2:E080	RBPmap
157	chr8:141001094	ssgcgcs	ccgcgcc	4	3.17e-05	RC1	4.49894	PTK2	PTK2:E139	RBPmap
164	chr8:141001101	ssgcgcs	ccgcgcc	4	3.17e-05	RC1	4.49894	PTK2	PTK2:E139	RBPmap
226	chr7:105116602	uauau	uauau	4	3.17e-05	HNRNPDL	4.49894	SRPK2	SRPK2:E005	RBPmap
228	chr7:105116604	uauau	uauau	4	3.17e-05	HNRNPDL	4.49894	SRPK2	SRPK2:E005	RBPmap
48	chr7:105117573	uacaca	aacaca	4	3.17e-05	HNRNPL	4.49894	SRPK2	SRPK2:E012	RBPmap
128	chr7:105142464	cuuucu	cuuucu	4	3.17e-05	TBP3	4.49894	SRPK2	SRPK2:E024	RBPmap
106	chr7:105206506	hrkacag	cagaaag	4	3.17e-05	ENOX1	4.49894	SRPK2	SRPK2:E041	RBPmap
60	chr16:1413905	guaguagu	gcuguagu	4	3.17e-05	HNRNPA1	4.49894	UNKL	UNKL:E043	RBPmap
10	chr16:1414065	hrkacag	cagacag	4	3.17e-05	ENOX1	4.49894	UNKL	UNKL:E045	RBPmap
9	chr16:1414064	amayama	acagaca	4	3.17e-05	HNRNPL	4.49894	UNKL	UNKL:E045	RBPmap
5	chr16:1414060	rcahaca	aaacaca	4	3.17e-05	HNRPLL	4.49894	UNKL	UNKL:E045	RBPmap
7	chr16:1414062	rcahaca	acacaga	4	3.17e-05	HNRPLL	4.49894	UNKL	UNKL:E045	RBPmap
23	chr8:140744790	agaaaaa	aaaaaaa	3.99	3.3e-05	PABPC1	4.48149	PTK2	PTK2:E062	CisRBP
24	chr8:140744791	agaaaaa	aaaaaaa	3.99	3.3e-05	PABPC1	4.48149	PTK2	PTK2:E062	CisRBP
25	chr8:140744792	agaaaaa	aaaaaaa	3.99	3.3e-05	PABPC1	4.48149	PTK2	PTK2:E062	CisRBP
26	chr8:140744793	agaaaaa	aaaaaaa	3.99	3.3e-05	PABPC1	4.48149	PTK2	PTK2:E062	CisRBP
27	chr8:140744794	agaaaaa	aaaaaaa	3.99	3.3e-05	PABPC1	4.48149	PTK2	PTK2:E062	CisRBP
28	chr8:140744795	agaaaaa	aaaaaaa	3.99	3.3e-05	PABPC1	4.48149	PTK2	PTK2:E062	CisRBP
29	chr8:140744796	agaaaaa	aaaaaaa	3.99	3.3e-05	PABPC1	4.48149	PTK2	PTK2:E062	CisRBP
30	chr8:140744797	agaaaaa	aaaaaaa	3.99	3.3e-05	PABPC1	4.48149	PTK2	PTK2:E062	CisRBP
54	chr8:17645715	uuuuubk	uuuuuug	3.99	3.3e-05	TIA1	4.48149	MTUS1	MTUS1:E004	RBPmap
25	chr11:14281714	guguua	guguua	3.989	3.32e-05	BOLL	4.47886	RRAS2	RRAS2:E010	RBPmap
227	chr7:105116603	auauau	auauau	3.989	3.32e-05	RBMS3	4.47886	SRPK2	SRPK2:E005	RBPmap
15	chr8:141001328	gcgcgg	gcgcgc	3.988	3.33e-05	RBM4B	4.47756	PTK2	PTK2:E151	RBPmap
1282	chr8:140669706	acacaca	acaaaga	3.987	3.35e-05	hnRNPLL	4.47496	PTK2	PTK2:E019	CisRBP
20	chr8:17723260	auuagu	uuuaga	3.987	3.35e-05	HNRNPA0	4.47496	MTUS1	MTUS1:E056	RBPmap
1282	chr8:140669706	rcahaca	acaaaga	3.987	3.35e-05	HNRPLL	4.47496	PTK2	PTK2:E019	RBPmap
43	chr7:105117568	uacaca	cacaca	3.987	3.35e-05	HNRNPL	4.47496	SRPK2	SRPK2:E012	RBPmap
75	chr3:48694946	hggagwa	aggagga	3.986	3.36e-05	LIN28A	4.47366	IP6K2	IP6K2:E035	RBPmap
78	chr3:48694949	hggagwa	aggagga	3.986	3.36e-05	LIN28A	4.47366	IP6K2	IP6K2:E035	RBPmap
87	chr3:48694958	hggagwa	aggagga	3.986	3.36e-05	LIN28A	4.47366	IP6K2	IP6K2:E035	RBPmap
191	chr3:48695359	bguusku	uguuguu	3.985	3.37e-05	ZNF638	4.47237	IP6K2	IP6K2:E039	RBPmap
142	chr11:14278823	guaguagu	guaucagu	3.984	3.39e-05	HNRNPA1	4.4698	RRAS2	RRAS2:E004	RBPmap
11	chr8:17723844	aaaaaaa	aaaaaaa	3.982	3.42e-05	PABPC4	4.46597	MTUS1	MTUS1:E058	CisRBP
12	chr8:17723845	aaaaaaa	aaaaaaa	3.982	3.42e-05	PABPC4	4.46597	MTUS1	MTUS1:E058	CisRBP
215	chr7:105143298	uuuuuyc	uuuuuuc	3.981	3.43e-05	U2AF2	4.46471	SRPK2	SRPK2:E025	RBPmap
11	chr14:21213079	gragga	ggagga	3.978	3.47e-05	SRSF1	4.45967	HNRNPC	HNRNPC:E031	RBPmap
14	chr14:21213082	gragga	ggagga	3.978	3.47e-05	SRSF1	4.45967	HNRNPC	HNRNPC:E031	RBPmap
17	chr14:21213085	gragga	ggagga	3.978	3.47e-05	SRSF1	4.45967	HNRNPC	HNRNPC:E031	RBPmap
126	chr11:14358382	gcgcgss	gcgcggg	3.978	3.47e-05	RBM4	4.45967	RRAS2	RRAS2:E022	RBPmap
75	chr3:48694946	ggagwd	aggagg	3.977	3.49e-05	SRSF2	4.45717	IP6K2	IP6K2:E035	RBPmap
78	chr3:48694949	ggagwd	aggagg	3.977	3.49e-05	SRSF2	4.45717	IP6K2	IP6K2:E035	RBPmap
87	chr3:48694958	ggagwd	aggagg	3.977	3.49e-05	SRSF2	4.45717	IP6K2	IP6K2:E035	RBPmap
48	chr6:41940457	cagcag	cagcag	3.975	3.52e-05	SRSF10	4.45346	CCND3	CCND3:E021	RBPmap
82	chr14:21263748	kkguguk	guguguu	3.974	3.53e-05	RBM38	4.45223	HNRNPC	HNRNPC:E060	RBPmap
250	chr11:14278931	aaaaaaa	aaaaaaa	3.973	3.55e-05	PABPC4	4.44977	RRAS2	RRAS2:E004	CisRBP
251	chr11:14278932	aaaaaaa	aaaaaaa	3.973	3.55e-05	PABPC4	4.44977	RRAS2	RRAS2:E004	CisRBP
36	chr14:21262734	aggaudr	aggaugg	3.973	3.55e-05	G3BP2	4.44977	HNRNPC	HNRNPC:E054	RBPmap
131	chr1:52991954	vmahwca	aaaaaca	3.973	3.55e-05	IGF2BP2	4.44977	RRAS2	RRAS2:E003	RBPmap
250	chr11:14278931	aaaaaar	aaaaaaa	3.973	3.55e-05	ABPC4	4.44977	RRAS2	RRAS2:E004	RBPmap
251	chr11:14278932	aaaaaar	aaaaaaa	3.973	3.55e-05	ABPC4	4.44977	RRAS2	RRAS2:E004	RBPmap
7	chr16:1414062	amayama	acacaga	3.973	3.55e-05	HNRNPL	4.44977	UNKL	UNKL:E045	RBPmap
13	chr16:1399386	cgccg	cgccg	3.971	3.58e-05	EIF4G2	4.44612	UNKL	UNKL:E034	RBPmap
20	chr16:1413865	cgccg	cgccg	3.971	3.58e-05	EIF4G2	4.44612	UNKL	UNKL:E043	RBPmap
194	chr3:48695362	bguusku	uguuugu	3.969	3.61e-05	ZNF638	4.44249	IP6K2	IP6K2:E039	RBPmap
1092	chr8:17644895	gguaguag	ggagguag	3.969	3.61e-05	HNRNPA2B1	4.44249	MTUS1	MTUS1:E003	RBPmap
1268	chr8:17645071	uuuduuu	uuuguuu	3.969	3.61e-05	ZC3H14	4.44249	MTUS1	MTUS1:E003	RBPmap
126	chr6:41936321	ccccacccc	ccccacucc	3.967	3.64e-05	CBP2	4.4389	CCND3	CCND3:E007	RBPmap
79	chr8:17676354	ccccacccc	ccccacccc	3.967	3.64e-05	CBP2	4.4389	MTUS1	MTUS1:E034	RBPmap
154	chr14:21210766	acacaca	gcacacu	3.962	3.72e-05	hnRNPLL	4.42946	HNRNPC	HNRNPC:E007	CisRBP
139	chr8:140735425	acacaca	ccaugca	3.962	3.72e-05	hnRNPLL	4.42946	PTK2	PTK2:E051	CisRBP
13	chr8:141001326	gcgcgcg	aggcgcg	3.962	3.72e-05	PPRC1	4.42946	PTK2	PTK2:E151	CisRBP
154	chr14:21210766	rcahaca	gcacacu	3.962	3.72e-05	HNRPLL	4.42946	HNRNPC	HNRNPC:E007	RBPmap
139	chr8:140735425	rcahaca	ccaugca	3.962	3.72e-05	HNRPLL	4.42946	PTK2	PTK2:E051	RBPmap
13	chr8:141001326	ssgcgcs	aggcgcg	3.962	3.72e-05	RC1	4.42946	PTK2	PTK2:E151	RBPmap
102	chr17:76072446	cgccg	ugccg	3.962	3.72e-05	EIF4G2	4.42946	SRP68	SRP68:E040	RBPmap
226	chr7:105116602	uauau	uauau	3.961	3.73e-05	FUBP3	4.42829	SRPK2	SRPK2:E005	RBPmap
228	chr7:105116604	uauau	uauau	3.961	3.73e-05	FUBP3	4.42829	SRPK2	SRPK2:E005	RBPmap
1384	chr14:21210519	auaaaav	auaaaau	3.959	3.76e-05	KHDRBS1	4.42481	HNRNPC	HNRNPC:E001	RBPmap
17	chr8:141001330	rygcgcb	gcgcguc	3.959	3.76e-05	RBM8A	4.42481	PTK2	PTK2:E151	RBPmap
121	chr11:14358377	ssagcgm	gcagcgc	3.959	3.76e-05	ZC3H10	4.42481	RRAS2	RRAS2:E022	RBPmap
377	chr11:14359139	gcgcgu	gcgccu	3.959	3.76e-05	RBM4	4.42481	RRAS2	RRAS2:E023	RBPmap
669	chr7:105117045	uuuaa	uuuaa	3.958	3.78e-05	RBM15B	4.42251	SRPK2	SRPK2:E005	RBPmap
1102	chr14:21210237	caacaca	aaacaca	3.957	3.79e-05	IGF2BP2	4.42136	HNRNPC	HNRNPC:E001	RBPmap
127	chr14:21262895	amahwca	aaauaca	3.955	3.83e-05	IGF2BP3	4.4168	HNRNPC	HNRNPC:E055	RBPmap
225	chr7:105116601	auauau	cuauau	3.955	3.83e-05	RBMS3	4.4168	SRPK2	SRPK2:E005	RBPmap
271	chr17:78207676	auaaav	gauaaa	3.953	3.86e-05	KHDRBS3	4.41341	AFMID	AFMID:E034	RBPmap
14	chr8:141001327	cgcgc	ggcgc	3.952	3.87e-05	FUS	4.41229	PTK2	PTK2:E151	RBPmap
27	chr8:17674863	agaaaaa	agaaaaa	3.951	3.89e-05	PABPC1	4.41005	MTUS1	MTUS1:E027	CisRBP
56	chr17:78204711	guaguagu	guaauagu	3.951	3.89e-05	HNRNPA1	4.41005	AFMID	AFMID:E018	RBPmap
4	chr8:140700773	guaguagu	gaaguagu	3.951	3.89e-05	HNRNPA1	4.41005	PTK2	PTK2:E029	RBPmap
128	chr7:105142464	cuuucu	cuuucu	3.951	3.89e-05	TB3	4.41005	SRPK2	SRPK2:E024	RBPmap
7	chr7:105203739	gukgykg	gcggugg	3.951	3.89e-05	HNRNPF	4.41005	SRPK2	SRPK2:E040	RBPmap
179	chr3:48693699	acacag	acacag	3.949	3.92e-05	CNOT4	4.40671	IP6K2	IP6K2:E019	RBPmap
51	chr7:105388841	acgacg	gacggc	3.949	3.92e-05	SRSF7	4.40671	SRPK2	SRPK2:E048	RBPmap
71	chr7:105388861	acgacg	gacgag	3.949	3.92e-05	SRSF7	4.40671	SRPK2	SRPK2:E048	RBPmap
1	chr8:17675988	amayama	acaaaua	3.947	3.96e-05	HNRNPL	4.4023	MTUS1	MTUS1:E031	RBPmap
68	chr7:105146560	uacaca	cacaua	3.947	3.96e-05	HNRNPL	4.4023	SRPK2	SRPK2:E028	RBPmap
82	chr7:105146574	amayama	ccacaca	3.947	3.96e-05	HNRNPL	4.4023	SRPK2	SRPK2:E028	RBPmap
71	chr8:140890386	acuaay	auuaac	3.946	3.97e-05	QKI	4.40121	PTK2	PTK2:E113	RBPmap
127	chr14:21262895	vmahwca	aaauaca	3.945	3.99e-05	IGF2BP2	4.39903	HNRNPC	HNRNPC:E055	RBPmap
10	chr16:1414730	gcgcgu	gcgccc	3.945	3.99e-05	RBM4	4.39903	UNKL	UNKL:E050	RBPmap
10	chr11:14337010	gaaaacc	aaaaaca	3.943	4.02e-05	PABPC3	4.39577	RRAS2	RRAS2:E017	CisRBP
155	chr1:52992952	auauau	guauau	3.943	4.02e-05	RBMS3	4.39577	RRAS2	RRAS2:E005	RBPmap
30	chr11:14358286	gcgcgg	gcgggg	3.942	4.04e-05	RBM4B	4.39362	RRAS2	RRAS2:E022	RBPmap
7	chr8:17721996	araaaam	aaaaaaa	3.941	4.06e-05	ABPC1	4.39147	MTUS1	MTUS1:E052	RBPmap
8	chr8:17721997	araaaam	aaaaaaa	3.941	4.06e-05	ABPC1	4.39147	MTUS1	MTUS1:E052	RBPmap
9	chr8:17721998	araaaam	aaaaaaa	3.941	4.06e-05	ABPC1	4.39147	MTUS1	MTUS1:E052	RBPmap
10	chr8:17721999	araaaam	aaaaaaa	3.941	4.06e-05	ABPC1	4.39147	MTUS1	MTUS1:E052	RBPmap
11	chr8:17722000	araaaam	aaaaaaa	3.941	4.06e-05	ABPC1	4.39147	MTUS1	MTUS1:E052	RBPmap
12	chr8:17722001	araaaam	aaaaaaa	3.941	4.06e-05	ABPC1	4.39147	MTUS1	MTUS1:E052	RBPmap
13	chr8:17722002	araaaam	aaaaaaa	3.941	4.06e-05	ABPC1	4.39147	MTUS1	MTUS1:E052	RBPmap
7	chr8:17721996	araaaam	aaaaaaa	3.941	4.06e-05	SART3	4.39147	MTUS1	MTUS1:E052	RBPmap
8	chr8:17721997	araaaam	aaaaaaa	3.941	4.06e-05	SART3	4.39147	MTUS1	MTUS1:E052	RBPmap
9	chr8:17721998	araaaam	aaaaaaa	3.941	4.06e-05	SART3	4.39147	MTUS1	MTUS1:E052	RBPmap
10	chr8:17721999	araaaam	aaaaaaa	3.941	4.06e-05	SART3	4.39147	MTUS1	MTUS1:E052	RBPmap
11	chr8:17722000	araaaam	aaaaaaa	3.941	4.06e-05	SART3	4.39147	MTUS1	MTUS1:E052	RBPmap
12	chr8:17722001	araaaam	aaaaaaa	3.941	4.06e-05	SART3	4.39147	MTUS1	MTUS1:E052	RBPmap
13	chr8:17722002	araaaam	aaaaaaa	3.941	4.06e-05	SART3	4.39147	MTUS1	MTUS1:E052	RBPmap
246	chr8:140717955	araaaam	agaaaaa	3.941	4.06e-05	ABPC1	4.39147	PTK2	PTK2:E043	RBPmap
246	chr8:140717955	araaaam	agaaaaa	3.941	4.06e-05	SART3	4.39147	PTK2	PTK2:E043	RBPmap
82	chr14:21211388	cuuucccu	cuuucccg	3.94	4.07e-05	PCBP3	4.39041	HNRNPC	HNRNPC:E018	CisRBP
6	chr8:141001291	cgcgc	ggcgc	3.94	4.07e-05	FUS	4.39041	PTK2	PTK2:E150	RBPmap
18	chr8:141001303	cgcgc	cgcgc	3.94	4.07e-05	FUS	4.39041	PTK2	PTK2:E150	RBPmap
158	chr1:52992955	uauaga	uauaga	3.939	4.09e-05	UNK	4.38828	RRAS2	RRAS2:E005	RBPmap
772	chr7:105117148	uauaga	uauaga	3.939	4.09e-05	UNK	4.38828	SRPK2	SRPK2:E005	RBPmap
4	chr6:41941770	gcgcgcg	gcccgcc	3.937	4.13e-05	PPRC1	4.38405	CCND3	CCND3:E029	CisRBP
8	chr6:41941774	gcgcgcg	gcccgcc	3.937	4.13e-05	PPRC1	4.38405	CCND3	CCND3:E029	CisRBP
93	chr8:140721751	cuuucu	cuuucu	3.937	4.13e-05	TBP3	4.38405	PTK2	PTK2:E048	RBPmap
78	chr14:21263744	kkguguk	augugug	3.936	4.14e-05	RBM38	4.383	HNRNPC	HNRNPC:E060	RBPmap
23	chr11:14358785	acgacg	gccgac	3.936	4.14e-05	SRSF7	4.383	RRAS2	RRAS2:E023	RBPmap
900	chr16:1364105	acacag	acacau	3.936	4.14e-05	CNOT4	4.383	UNKL	UNKL:E002	RBPmap
8	chr16:1414728	ssgcgcs	cggcgcc	3.936	4.14e-05	RC1	4.383	UNKL	UNKL:E050	RBPmap
374	chr14:21209509	aacaucd	aacauca	3.935	4.16e-05	YBX1	4.38091	HNRNPC	HNRNPC:E001	RBPmap
750	chr16:1365761	uacaca	uacaca	3.934	4.18e-05	HNRNPL	4.37882	UNKL	UNKL:E006	RBPmap
112	chr14:21262880	aauaaa	aauaaa	3.933	4.19e-05	KHDRBS3	4.37779	HNRNPC	HNRNPC:E055	RBPmap
246	chr8:140675745	amayama	aaacaca	3.933	4.19e-05	HNRNPL	4.37779	PTK2	PTK2:E025	RBPmap
78	chr17:76072422	cgccg	cgcca	3.933	4.19e-05	EIF4G2	4.37779	SRP68	SRP68:E040	RBPmap
45	chr6:41941811	gcgcgu	gcgccc	3.932	4.21e-05	RBM4	4.37572	CCND3	CCND3:E029	RBPmap
10	chr11:14337010	raaaacm	aaaaaca	3.932	4.21e-05	ABPC3	4.37572	RRAS2	RRAS2:E017	RBPmap
64	chr16:1385271	ssagcgm	gcagcgc	3.932	4.21e-05	ZC3H10	4.37572	UNKL	UNKL:E026	RBPmap
14	chr16:1414711	rygcgcb	gcgcgca	3.932	4.21e-05	RBM8A	4.37572	UNKL	UNKL:E049	RBPmap
29	chr8:17674865	araaaam	aaaaaaa	3.931	4.23e-05	ABPC1	4.37366	MTUS1	MTUS1:E027	RBPmap
30	chr8:17674866	araaaam	aaaaaaa	3.931	4.23e-05	ABPC1	4.37366	MTUS1	MTUS1:E027	RBPmap
31	chr8:17674867	araaaam	aaaaaaa	3.931	4.23e-05	ABPC1	4.37366	MTUS1	MTUS1:E027	RBPmap
29	chr8:17674865	araaaam	aaaaaaa	3.931	4.23e-05	SART3	4.37366	MTUS1	MTUS1:E027	RBPmap
30	chr8:17674866	araaaam	aaaaaaa	3.931	4.23e-05	SART3	4.37366	MTUS1	MTUS1:E027	RBPmap
31	chr8:17674867	araaaam	aaaaaaa	3.931	4.23e-05	SART3	4.37366	MTUS1	MTUS1:E027	RBPmap
33	chr8:140746893	uuuuauuu	uuuuuuuu	3.931	4.23e-05	RBM15B	4.37366	PTK2	PTK2:E066	RBPmap
34	chr8:140746894	uuuuauuu	uuuuuuuu	3.931	4.23e-05	RBM15B	4.37366	PTK2	PTK2:E066	RBPmap
35	chr8:140746895	uuuuauuu	uuuuuuuu	3.931	4.23e-05	RBM15B	4.37366	PTK2	PTK2:E066	RBPmap
3	chr7:105116379	araaaam	aaaaaaa	3.931	4.23e-05	SART3	4.37366	SRPK2	SRPK2:E005	RBPmap
4	chr7:105116380	araaaam	aaaaaaa	3.931	4.23e-05	SART3	4.37366	SRPK2	SRPK2:E005	RBPmap
5	chr7:105116381	araaaam	aaaaaaa	3.931	4.23e-05	SART3	4.37366	SRPK2	SRPK2:E005	RBPmap
6	chr7:105116382	araaaam	aaaaaaa	3.931	4.23e-05	SART3	4.37366	SRPK2	SRPK2:E005	RBPmap
7	chr7:105116383	araaaam	aaaaaaa	3.931	4.23e-05	SART3	4.37366	SRPK2	SRPK2:E005	RBPmap
37	chr7:105388827	gcgcgg	gcgggg	3.93	4.25e-05	RBM4B	4.37161	SRPK2	SRPK2:E048	RBPmap
32	chr8:140746892	chuuuuu	cuuuuuu	3.929	4.26e-05	CPEB2	4.37059	PTK2	PTK2:E066	RBPmap
112	chr1:52991935	caacaca	aaacaca	3.929	4.26e-05	IGF2BP2	4.37059	RRAS2	RRAS2:E003	RBPmap
157	chr1:52992954	auauaa	auauag	3.929	4.26e-05	RBMS2	4.37059	RRAS2	RRAS2:E005	RBPmap
121	chr6:41936316	ccawmcc	cccaccc	3.928	4.28e-05	HNRNPK	4.36856	CCND3	CCND3:E007	RBPmap
115	chr16:1385322	acgca	acgcc	3.928	4.28e-05	RBM45	4.36856	UNKL	UNKL:E026	RBPmap
120	chr16:1385327	acgca	acgcu	3.928	4.28e-05	RBM45	4.36856	UNKL	UNKL:E026	RBPmap
229	chr8:17653727	gccca	gccca	3.927	4.3e-05	HNRNPK	4.36653	MTUS1	MTUS1:E016	RBPmap
124	chr14:21262892	uaaaa	uaaaa	3.926	4.32e-05	HNRNPDL	4.36452	HNRNPC	HNRNPC:E055	RBPmap
147	chr14:21230513	aucac	aucac	3.924	4.35e-05	NOVA1	4.36151	HNRNPC	HNRNPC:E036	RBPmap
75	chr3:48694946	akgavmr	aggagga	3.923	4.37e-05	SRSF9	4.35952	IP6K2	IP6K2:E035	RBPmap
78	chr3:48694949	akgavmr	aggagga	3.923	4.37e-05	SRSF9	4.35952	IP6K2	IP6K2:E035	RBPmap
87	chr3:48694958	akgavmr	aggagga	3.923	4.37e-05	SRSF9	4.35952	IP6K2	IP6K2:E035	RBPmap
7	chr16:1414062	acacag	acacag	3.923	4.37e-05	CNOT4	4.35952	UNKL	UNKL:E045	RBPmap
13	chr3:48689622	aacauca	agcauca	3.922	4.39e-05	CSDA	4.35754	IP6K2	IP6K2:E003	CisRBP
16	chr3:48689625	aacauca	aucauca	3.922	4.39e-05	CSDA	4.35754	IP6K2	IP6K2:E003	CisRBP
3	chr7:105116379	agaaaaa	aaaaaaa	3.922	4.39e-05	PABPC1	4.35754	SRPK2	SRPK2:E005	CisRBP
4	chr7:105116380	agaaaaa	aaaaaaa	3.922	4.39e-05	PABPC1	4.35754	SRPK2	SRPK2:E005	CisRBP
5	chr7:105116381	agaaaaa	aaaaaaa	3.922	4.39e-05	PABPC1	4.35754	SRPK2	SRPK2:E005	CisRBP
6	chr7:105116382	agaaaaa	aaaaaaa	3.922	4.39e-05	PABPC1	4.35754	SRPK2	SRPK2:E005	CisRBP
7	chr7:105116383	agaaaaa	aaaaaaa	3.922	4.39e-05	PABPC1	4.35754	SRPK2	SRPK2:E005	CisRBP
98	chr14:21262866	aauaaa	aauaaa	3.922	4.39e-05	KHDRBS3	4.35754	HNRNPC	HNRNPC:E055	RBPmap
79	chr14:21263745	wgwgugd	ugugugu	3.922	4.39e-05	RBM24	4.35754	HNRNPC	HNRNPC:E060	RBPmap
81	chr14:21263747	wgwgugd	ugugugu	3.922	4.39e-05	RBM24	4.35754	HNRNPC	HNRNPC:E060	RBPmap
13	chr3:48689622	aacaucd	agcauca	3.922	4.39e-05	YBX1	4.35754	IP6K2	IP6K2:E003	RBPmap
16	chr3:48689625	aacaucd	aucauca	3.922	4.39e-05	YBX1	4.35754	IP6K2	IP6K2:E003	RBPmap
3	chr7:105116379	araaaam	aaaaaaa	3.922	4.39e-05	ABPC1	4.35754	SRPK2	SRPK2:E005	RBPmap
4	chr7:105116380	araaaam	aaaaaaa	3.922	4.39e-05	ABPC1	4.35754	SRPK2	SRPK2:E005	RBPmap
5	chr7:105116381	araaaam	aaaaaaa	3.922	4.39e-05	ABPC1	4.35754	SRPK2	SRPK2:E005	RBPmap
6	chr7:105116382	araaaam	aaaaaaa	3.922	4.39e-05	ABPC1	4.35754	SRPK2	SRPK2:E005	RBPmap
7	chr7:105116383	araaaam	aaaaaaa	3.922	4.39e-05	ABPC1	4.35754	SRPK2	SRPK2:E005	RBPmap
178	chr14:21210790	uacaca	cacaua	3.921	4.41e-05	HNRNPL	4.35556	HNRNPC	HNRNPC:E007	RBPmap
4	chr14:21262996	ugggrad	aggggau	3.921	4.41e-05	ESRP2	4.35556	HNRNPC	HNRNPC:E056	RBPmap
156	chr1:52992953	uauau	uauau	3.921	4.41e-05	HNRNPDL	4.35556	RRAS2	RRAS2:E005	RBPmap
45	chr7:105110748	uauag	uauag	3.921	4.41e-05	HNRNPA0	4.35556	SRPK2	SRPK2:E001	RBPmap
118	chr6:41936313	ccccacccc	ccccccacc	3.918	4.46e-05	CBP2	4.35067	CCND3	CCND3:E007	RBPmap
224	chr7:105143307	uuuduuu	uuuguuu	3.918	4.46e-05	ZC3H14	4.35067	SRPK2	SRPK2:E025	RBPmap
10	chr3:48694834	caacaca	aaacaca	3.914	4.54e-05	IGF2BP2	4.34294	IP6K2	IP6K2:E034	RBPmap
8	chr11:14359163	cgccg	cgccg	3.914	4.54e-05	EIF4G2	4.34294	RRAS2	RRAS2:E025	RBPmap
120	chr17:76072464	cgccg	cgccu	3.914	4.54e-05	EIF4G2	4.34294	SRP68	SRP68:E040	RBPmap
42	chr7:105117567	caacaca	ucacaca	3.914	4.54e-05	IGF2BP2	4.34294	SRPK2	SRPK2:E012	RBPmap
13	chr7:105389256	cgccg	cgccg	3.914	4.54e-05	EIF4G2	4.34294	SRPK2	SRPK2:E051	RBPmap
246	chr8:140717955	agaaaaa	agaaaaa	3.913	4.56e-05	PABPC1	4.34104	PTK2	PTK2:E043	CisRBP
188	chr8:17722177	ucaaaag	acaaaag	3.912	4.58e-05	SF3B4	4.33913	MTUS1	MTUS1:E052	CisRBP
257	chr17:78207662	uaaau	uaaau	3.912	4.58e-05	UM1	4.33913	AFMID	AFMID:E034	RBPmap
101	chr14:21262869	araaaam	aaaaaaa	3.912	4.58e-05	SART3	4.33913	HNRNPC	HNRNPC:E055	RBPmap
115	chr14:21262883	araaaam	aaaaaaa	3.912	4.58e-05	SART3	4.33913	HNRNPC	HNRNPC:E055	RBPmap
116	chr14:21262884	araaaam	aaaaaaa	3.912	4.58e-05	SART3	4.33913	HNRNPC	HNRNPC:E055	RBPmap
1268	chr8:17645071	uukruuu	uuuguuu	3.912	4.58e-05	HuR	4.33913	MTUS1	MTUS1:E003	RBPmap
82	chr8:17684435	uukruuu	uuguuuu	3.912	4.58e-05	HuR	4.33913	MTUS1	MTUS1:E039	RBPmap
1284	chr8:140669708	acacaca	aaagaca	3.911	4.6e-05	hnRNPLL	4.33724	PTK2	PTK2:E019	CisRBP
1284	chr8:140669708	rcahaca	aaagaca	3.911	4.6e-05	HNRPLL	4.33724	PTK2	PTK2:E019	RBPmap
16	chr14:21211322	amahwca	acaaaca	3.91	4.61e-05	IGF2BP3	4.3363	HNRNPC	HNRNPC:E018	RBPmap
2	chr16:1414722	ssgcgcs	ccgcgcc	3.91	4.61e-05	RC1	4.3363	UNKL	UNKL:E050	RBPmap
101	chr14:21262869	aaaauaa	aaaaaaa	3.909	4.63e-05	NUPL2	4.33442	HNRNPC	HNRNPC:E055	RBPmap
115	chr14:21262883	aaaauaa	aaaaaaa	3.909	4.63e-05	NUPL2	4.33442	HNRNPC	HNRNPC:E055	RBPmap
116	chr14:21262884	aaaauaa	aaaaaaa	3.909	4.63e-05	NUPL2	4.33442	HNRNPC	HNRNPC:E055	RBPmap
14	chr14:21263350	aaaauaa	aaaauaa	3.909	4.63e-05	NUPL2	4.33442	HNRNPC	HNRNPC:E058	RBPmap
1086	chr8:17644889	uaguwrg	uagguag	3.909	4.63e-05	MSI1	4.33442	MTUS1	MTUS1:E003	RBPmap
15	chr7:105116391	raaaacm	caaaaca	3.909	4.63e-05	ABPC3	4.33442	SRPK2	SRPK2:E005	RBPmap
45	chr14:21262813	uacaca	cacaca	3.908	4.65e-05	HNRNPL	4.33255	HNRNPC	HNRNPC:E055	RBPmap
47	chr14:21262815	uacaca	cacaca	3.908	4.65e-05	HNRNPL	4.33255	HNRNPC	HNRNPC:E055	RBPmap
22	chr14:21263014	ugggrad	ugggguu	3.908	4.65e-05	ESRP2	4.33255	HNRNPC	HNRNPC:E056	RBPmap
113	chr1:52991936	uacaca	aacaca	3.908	4.65e-05	HNRNPL	4.33255	RRAS2	RRAS2:E003	RBPmap
1284	chr8:140669708	amayama	aaagaca	3.907	4.67e-05	HNRNPL	4.33068	PTK2	PTK2:E019	RBPmap
244	chr8:140675743	amayama	acaaaca	3.907	4.67e-05	HNRNPL	4.33068	PTK2	PTK2:E025	RBPmap
265	chr6:41941426	gggugggg	gggagggg	3.906	4.69e-05	ILF2	4.32883	CCND3	CCND3:E025	RBPmap
91	chr14:21262859	rauaaam	gauuaaa	3.906	4.69e-05	KHDRBS2	4.32883	HNRNPC	HNRNPC:E055	RBPmap
198	chr6:41941717	rygcgcb	gagcgcg	3.905	4.71e-05	RBM8A	4.32698	CCND3	CCND3:E027	RBPmap
205	chr6:41941724	rygcgcb	gggcgcg	3.905	4.71e-05	RBM8A	4.32698	CCND3	CCND3:E027	RBPmap
70	chr6:41941021	gcgcgu	gcgcgc	3.904	4.73e-05	RBM4	4.32514	CCND3	CCND3:E024	RBPmap
72	chr6:41941023	gcgcgu	gcgcgc	3.904	4.73e-05	RBM4	4.32514	CCND3	CCND3:E024	RBPmap
24	chr6:41941790	cgcgc	cgcgc	3.904	4.73e-05	FUS	4.32514	CCND3	CCND3:E029	RBPmap
26	chr6:41941792	cgcgc	cgcgc	3.904	4.73e-05	FUS	4.32514	CCND3	CCND3:E029	RBPmap
242	chr14:21263234	uguaag	aguaac	3.904	4.73e-05	SFPQ	4.32514	HNRNPC	HNRNPC:E056	RBPmap
196	chr8:140659268	vmahwca	aaaaaca	3.904	4.73e-05	IGF2BP2	4.32514	PTK2	PTK2:E008	RBPmap
101	chr14:21262869	araaaam	aaaaaaa	3.902	4.77e-05	ABPC1	4.32148	HNRNPC	HNRNPC:E055	RBPmap
115	chr14:21262883	araaaam	aaaaaaa	3.902	4.77e-05	ABPC1	4.32148	HNRNPC	HNRNPC:E055	RBPmap
116	chr14:21262884	araaaam	aaaaaaa	3.902	4.77e-05	ABPC1	4.32148	HNRNPC	HNRNPC:E055	RBPmap
72	chr14:21263654	araaaam	aaaaaaa	3.902	4.77e-05	SART3	4.32148	HNRNPC	HNRNPC:E059	RBPmap
73	chr14:21263655	araaaam	aaaaaaa	3.902	4.77e-05	SART3	4.32148	HNRNPC	HNRNPC:E059	RBPmap
74	chr14:21263656	araaaam	aaaaaaa	3.902	4.77e-05	SART3	4.32148	HNRNPC	HNRNPC:E059	RBPmap
75	chr14:21263657	araaaam	aaaaaaa	3.902	4.77e-05	SART3	4.32148	HNRNPC	HNRNPC:E059	RBPmap
53	chr8:17645714	uuuuuub	uuuuuuu	3.902	4.77e-05	RALY	4.32148	MTUS1	MTUS1:E004	RBPmap
29	chr8:140718384	agcagc	ggcagc	3.902	4.77e-05	SRSF8	4.32148	PTK2	PTK2:E047	RBPmap
156	chr14:21210768	acacaaa	acacuaa	3.901	4.79e-05	ENSG00000215042	4.31966	HNRNPC	HNRNPC:E007	CisRBP
13	chr14:21209148	wuacwuk	uuacauu	3.901	4.79e-05	RBM41	4.31966	HNRNPC	HNRNPC:E001	RBPmap
156	chr14:21210768	acacrav	acacuaa	3.901	4.79e-05	HNRNPL	4.31966	HNRNPC	HNRNPC:E007	RBPmap
4	chr3:48694529	uaaaa	uaaaa	3.901	4.79e-05	HNRNPDL	4.31966	IP6K2	IP6K2:E029	RBPmap
16	chr3:48694541	uaaaa	uaaaa	3.901	4.79e-05	HNRNPDL	4.31966	IP6K2	IP6K2:E029	RBPmap
26	chr3:48694551	uaaaa	uaaaa	3.901	4.79e-05	HNRNPDL	4.31966	IP6K2	IP6K2:E029	RBPmap
12	chr6:41936795	cagcag	gagcag	3.9	4.81e-05	SRSF10	4.31785	CCND3	CCND3:E013	RBPmap
402	chr8:17644205	acacaca	gcaaaca	3.899	4.83e-05	hnRNPLL	4.31605	MTUS1	MTUS1:E003	CisRBP
15	chr7:105116391	gaaaacc	caaaaca	3.898	4.85e-05	PABPC3	4.31426	SRPK2	SRPK2:E005	CisRBP
49	chr6:41940458	agcagc	agcagc	3.898	4.85e-05	SRSF2	4.31426	CCND3	CCND3:E021	RBPmap
381	chr8:140658280	uaauua	uaauua	3.898	4.85e-05	A1CF	4.31426	PTK2	PTK2:E001	RBPmap
128	chr6:41936323	ccaaccc	ccacucc	3.897	4.87e-05	hnRNPK	4.31247	CCND3	CCND3:E007	CisRBP
70	chr6:41941021	ssgcgcs	gcgcgcg	3.897	4.87e-05	RC1	4.31247	CCND3	CCND3:E024	RBPmap
6	chr6:41941772	ssgcgcs	ccgcccg	3.897	4.87e-05	RC1	4.31247	CCND3	CCND3:E029	RBPmap
13	chr6:41941779	ssgcgcs	ccgcccg	3.897	4.87e-05	RC1	4.31247	CCND3	CCND3:E029	RBPmap
112	chr1:52991935	amahwca	aaacaca	3.896	4.89e-05	IGF2BP3	4.31069	RRAS2	RRAS2:E003	RBPmap
94	chr6:41941613	gcgcgg	gcgcgu	3.895	4.91e-05	RBM4B	4.30892	CCND3	CCND3:E027	RBPmap
276	chr8:17723516	uuuuuyc	uuuuuuc	3.895	4.91e-05	U2AF2	4.30892	MTUS1	MTUS1:E056	RBPmap
265	chr6:41941426	gggagggg	gggagggg	3.894	4.93e-05	HNRNPF	4.30715	CCND3	CCND3:E025	RBPmap
2	chr3:48694527	rauaaam	uauaaaa	3.894	4.93e-05	KHDRBS2	4.30715	IP6K2	IP6K2:E029	RBPmap
14	chr3:48694539	rauaaam	uauaaaa	3.894	4.93e-05	KHDRBS2	4.30715	IP6K2	IP6K2:E029	RBPmap
7	chr8:17721996	agaaaaa	aaaaaaa	3.893	4.95e-05	PABPC1	4.30539	MTUS1	MTUS1:E052	CisRBP
8	chr8:17721997	agaaaaa	aaaaaaa	3.893	4.95e-05	PABPC1	4.30539	MTUS1	MTUS1:E052	CisRBP
9	chr8:17721998	agaaaaa	aaaaaaa	3.893	4.95e-05	PABPC1	4.30539	MTUS1	MTUS1:E052	CisRBP
10	chr8:17721999	agaaaaa	aaaaaaa	3.893	4.95e-05	PABPC1	4.30539	MTUS1	MTUS1:E052	CisRBP
11	chr8:17722000	agaaaaa	aaaaaaa	3.893	4.95e-05	PABPC1	4.30539	MTUS1	MTUS1:E052	CisRBP
12	chr8:17722001	agaaaaa	aaaaaaa	3.893	4.95e-05	PABPC1	4.30539	MTUS1	MTUS1:E052	CisRBP
13	chr8:17722002	agaaaaa	aaaaaaa	3.893	4.95e-05	PABPC1	4.30539	MTUS1	MTUS1:E052	CisRBP
41	chr8:17645702	uuuuuub	uuuuuuu	3.893	4.95e-05	RALY	4.30539	MTUS1	MTUS1:E004	RBPmap
1262	chr8:140669686	agagaaa	agagaga	3.892	4.97e-05	Fusip1	4.30364	PTK2	PTK2:E019	CisRBP
20	chr6:41941786	cgcgc	cgcgc	3.892	4.97e-05	FUS	4.30364	CCND3	CCND3:E029	RBPmap
22	chr6:41941788	cgcgc	cgcgc	3.892	4.97e-05	FUS	4.30364	CCND3	CCND3:E029	RBPmap
72	chr14:21263654	araaaam	aaaaaaa	3.892	4.97e-05	ABPC1	4.30364	HNRNPC	HNRNPC:E059	RBPmap
73	chr14:21263655	araaaam	aaaaaaa	3.892	4.97e-05	ABPC1	4.30364	HNRNPC	HNRNPC:E059	RBPmap
74	chr14:21263656	araaaam	aaaaaaa	3.892	4.97e-05	ABPC1	4.30364	HNRNPC	HNRNPC:E059	RBPmap
75	chr14:21263657	araaaam	aaaaaaa	3.892	4.97e-05	ABPC1	4.30364	HNRNPC	HNRNPC:E059	RBPmap
1262	chr8:140669686	agagavm	agagaga	3.892	4.97e-05	SRSF10	4.30364	PTK2	PTK2:E019	RBPmap
424	chr7:105143754	kgugukk	uguuugg	3.892	4.97e-05	BRUNOL4	4.30364	SRPK2	SRPK2:E026	RBPmap
242	chr14:21263234	acuaay	aguaac	3.891	4.99e-05	QKI	4.3019	HNRNPC	HNRNPC:E056	RBPmap
17	chr6:41941783	gcgcgu	ccgcgc	3.89	5.01e-05	RBM4	4.30016	CCND3	CCND3:E029	RBPmap
1627	chr8:17645430	kauauas	uauauuc	3.89	5.01e-05	RBMS1	4.30016	MTUS1	MTUS1:E003	RBPmap
93	chr8:140721751	cuuucu	cuuucu	3.889	5.03e-05	TB3	4.29843	PTK2	PTK2:E048	RBPmap
230	chr8:140658859	acacaaa	acacgaa	3.887	5.07e-05	ENSG00000215042	4.29499	PTK2	PTK2:E006	CisRBP
230	chr8:140658859	acacrav	acacgaa	3.887	5.07e-05	HNRNPL	4.29499	PTK2	PTK2:E006	RBPmap
33	chr8:140746893	uuuduuu	uuuuuuu	3.887	5.07e-05	ZC3H14	4.29499	PTK2	PTK2:E066	RBPmap
34	chr8:140746894	uuuduuu	uuuuuuu	3.887	5.07e-05	ZC3H14	4.29499	PTK2	PTK2:E066	RBPmap
35	chr8:140746895	uuuduuu	uuuuuuu	3.887	5.07e-05	ZC3H14	4.29499	PTK2	PTK2:E066	RBPmap
109	chr7:105142445	cuuucu	uuuucu	3.887	5.07e-05	TBP3	4.29499	SRPK2	SRPK2:E024	RBPmap
8	chr16:1414728	gcgcgcg	cggcgcc	3.886	5.1e-05	PPRC1	4.29243	UNKL	UNKL:E050	CisRBP
402	chr8:17644205	rcahaca	gcaaaca	3.886	5.1e-05	HNRPLL	4.29243	MTUS1	MTUS1:E003	RBPmap
374	chr14:21209509	aacauca	aacauca	3.885	5.12e-05	CSDA	4.29073	HNRNPC	HNRNPC:E001	CisRBP
7	chr8:141001292	gcgcgcg	gcgcggg	3.885	5.12e-05	PPRC1	4.29073	PTK2	PTK2:E150	CisRBP
232	chr3:48688234	acacag	acacag	3.885	5.12e-05	CNOT4	4.29073	IP6K2	IP6K2:E001	RBPmap
7	chr8:141001292	ssgcgcs	gcgcggg	3.885	5.12e-05	RC1	4.29073	PTK2	PTK2:E150	RBPmap
49	chr11:14358811	acgacg	gaccac	3.885	5.12e-05	SRSF7	4.29073	RRAS2	RRAS2:E023	RBPmap
19	chr6:41941785	gcgcgg	gcgcgc	3.884	5.14e-05	RBM4B	4.28904	CCND3	CCND3:E029	RBPmap
21	chr6:41941787	gcgcgg	gcgcgc	3.884	5.14e-05	RBM4B	4.28904	CCND3	CCND3:E029	RBPmap
23	chr6:41941789	gcgcgg	gcgcgc	3.884	5.14e-05	RBM4B	4.28904	CCND3	CCND3:E029	RBPmap
25	chr6:41941791	gcgcgg	gcgcgc	3.884	5.14e-05	RBM4B	4.28904	CCND3	CCND3:E029	RBPmap
15	chr8:141001300	gcgcgg	ccgcgc	3.884	5.14e-05	RBM4B	4.28904	PTK2	PTK2:E150	RBPmap
29	chr8:17674865	agaaaaa	aaaaaaa	3.883	5.16e-05	PABPC1	4.28735	MTUS1	MTUS1:E027	CisRBP
30	chr8:17674866	agaaaaa	aaaaaaa	3.883	5.16e-05	PABPC1	4.28735	MTUS1	MTUS1:E027	CisRBP
31	chr8:17674867	agaaaaa	aaaaaaa	3.883	5.16e-05	PABPC1	4.28735	MTUS1	MTUS1:E027	CisRBP
53	chr8:17645714	uuuuubk	uuuuuuu	3.882	5.18e-05	TIA1	4.28567	MTUS1	MTUS1:E004	RBPmap
364	chr8:140658263	rauaaam	aauaaaa	3.882	5.18e-05	KHDRBS2	4.28567	PTK2	PTK2:E001	RBPmap
211	chr14:21263203	uauaag	cauaag	3.881	5.2e-05	RR3	4.284	HNRNPC	HNRNPC:E056	RBPmap
90	chr3:48694961	aggag	aggag	3.881	5.2e-05	SRSF9	4.284	IP6K2	IP6K2:E035	RBPmap
37	chr8:140658666	auauaa	auauaa	3.881	5.2e-05	RBMS2	4.284	PTK2	PTK2:E006	RBPmap
131	chr1:52991954	amahwca	aaaaaca	3.881	5.2e-05	IGF2BP3	4.284	RRAS2	RRAS2:E003	RBPmap
18	chr6:41941784	cgcgc	cgcgc	3.88	5.22e-05	FUS	4.28233	CCND3	CCND3:E029	RBPmap
1264	chr8:17645067	uukruuu	uuaguuu	3.879	5.24e-05	HuR	4.28067	MTUS1	MTUS1:E003	RBPmap
13	chr11:14337013	aacawcd	aacagca	3.878	5.27e-05	YBX2	4.27819	RRAS2	RRAS2:E017	RBPmap
352	chr11:14359114	rygcgcb	gcgcgcu	3.878	5.27e-05	RBM8A	4.27819	RRAS2	RRAS2:E023	RBPmap
16	chr14:21211322	vmahwca	acaaaca	3.877	5.29e-05	IGF2BP2	4.27654	HNRNPC	HNRNPC:E018	RBPmap
354	chr11:14359116	gcgcgu	gcgcuc	3.877	5.29e-05	RBM4	4.27654	RRAS2	RRAS2:E023	RBPmap
91	chr3:48694435	uuaau	uuaau	3.876	5.31e-05	FUBP3	4.27491	IP6K2	IP6K2:E027	RBPmap
165	chr7:105116541	uaaaa	uaaaa	3.876	5.31e-05	HNRNPDL	4.27491	SRPK2	SRPK2:E005	RBPmap
76	chr6:42048074	aucaacg	aucaucu	3.875	5.33e-05	SRSF3	4.27327	CCND3	CCND3:E032	CisRBP
48	chr6:41940457	gcgcagc	cagcagc	3.875	5.33e-05	MBNL1	4.27327	CCND3	CCND3:E021	RBPmap
194	chr3:48695362	ugugukk	uguuugu	3.875	5.33e-05	BRUNOL5	4.27327	IP6K2	IP6K2:E039	RBPmap
196	chr8:140659268	raaaacm	aaaaaca	3.875	5.33e-05	ABPC3	4.27327	PTK2	PTK2:E008	RBPmap
1271	chr8:140669695	hrkacag	uggacag	3.875	5.33e-05	ENOX1	4.27327	PTK2	PTK2:E019	RBPmap
102	chr8:140721760	cuuucu	cuuucu	3.875	5.33e-05	TBP3	4.27327	PTK2	PTK2:E048	RBPmap
46	chr16:1367137	gcgcagc	gugcagc	3.875	5.33e-05	MBNL1	4.27327	UNKL	UNKL:E010	RBPmap
131	chr16:1385338	cacgc	cacgc	3.875	5.33e-05	HNRNPK	4.27327	UNKL	UNKL:E026	RBPmap
101	chr14:21262869	agaaaaa	aaaaaaa	3.874	5.35e-05	PABPC1	4.27165	HNRNPC	HNRNPC:E055	CisRBP
115	chr14:21262883	agaaaaa	aaaaaaa	3.874	5.35e-05	PABPC1	4.27165	HNRNPC	HNRNPC:E055	CisRBP
116	chr14:21262884	agaaaaa	aaaaaaa	3.874	5.35e-05	PABPC1	4.27165	HNRNPC	HNRNPC:E055	CisRBP
156	chr1:52992953	uauau	uauau	3.874	5.35e-05	FUBP3	4.27165	RRAS2	RRAS2:E005	RBPmap
29	chr6:41941480	agcaugc	cgcaugu	3.873	5.38e-05	EIF2S1	4.26922	CCND3	CCND3:E026	CisRBP
154	chr8:140735440	acacaca	ucccaca	3.873	5.38e-05	hnRNPLL	4.26922	PTK2	PTK2:E051	CisRBP
156	chr8:140735442	acacaca	ccacaua	3.873	5.38e-05	hnRNPLL	4.26922	PTK2	PTK2:E051	CisRBP
50	chr7:105306485	agaaaaa	aaaaaaa	3.873	5.38e-05	PABPC1	4.26922	SRPK2	SRPK2:E046	CisRBP
51	chr7:105306486	agaaaaa	aaaaaaa	3.873	5.38e-05	PABPC1	4.26922	SRPK2	SRPK2:E046	CisRBP
52	chr7:105306487	agaaaaa	aaaaaaa	3.873	5.38e-05	PABPC1	4.26922	SRPK2	SRPK2:E046	CisRBP
53	chr7:105306488	agaaaaa	aaaaaaa	3.873	5.38e-05	PABPC1	4.26922	SRPK2	SRPK2:E046	CisRBP
41	chr8:17645702	uuuuubk	uuuuuuu	3.873	5.38e-05	TIA1	4.26922	MTUS1	MTUS1:E004	RBPmap
367	chr8:140658266	araaaam	aaaaaaa	3.873	5.38e-05	SART3	4.26922	PTK2	PTK2:E001	RBPmap
368	chr8:140658267	araaaam	aaaaaaa	3.873	5.38e-05	SART3	4.26922	PTK2	PTK2:E001	RBPmap
369	chr8:140658268	araaaam	aaaaaaa	3.873	5.38e-05	SART3	4.26922	PTK2	PTK2:E001	RBPmap
154	chr8:140735440	rcahaca	ucccaca	3.873	5.38e-05	HNRPLL	4.26922	PTK2	PTK2:E051	RBPmap
156	chr8:140735442	rcahaca	ccacaua	3.873	5.38e-05	HNRPLL	4.26922	PTK2	PTK2:E051	RBPmap
50	chr7:105306485	araaaam	aaaaaaa	3.873	5.38e-05	ABPC1	4.26922	SRPK2	SRPK2:E046	RBPmap
51	chr7:105306486	araaaam	aaaaaaa	3.873	5.38e-05	ABPC1	4.26922	SRPK2	SRPK2:E046	RBPmap
52	chr7:105306487	araaaam	aaaaaaa	3.873	5.38e-05	ABPC1	4.26922	SRPK2	SRPK2:E046	RBPmap
53	chr7:105306488	araaaam	aaaaaaa	3.873	5.38e-05	ABPC1	4.26922	SRPK2	SRPK2:E046	RBPmap
50	chr7:105306485	araaaam	aaaaaaa	3.873	5.38e-05	SART3	4.26922	SRPK2	SRPK2:E046	RBPmap
51	chr7:105306486	araaaam	aaaaaaa	3.873	5.38e-05	SART3	4.26922	SRPK2	SRPK2:E046	RBPmap
52	chr7:105306487	araaaam	aaaaaaa	3.873	5.38e-05	SART3	4.26922	SRPK2	SRPK2:E046	RBPmap
53	chr7:105306488	araaaam	aaaaaaa	3.873	5.38e-05	SART3	4.26922	SRPK2	SRPK2:E046	RBPmap
19	chr8:141001304	gcgcgcg	gcgcgug	3.872	5.4e-05	PPRC1	4.26761	PTK2	PTK2:E150	CisRBP
19	chr8:141001304	ssgcgcs	gcgcgug	3.872	5.4e-05	RC1	4.26761	PTK2	PTK2:E150	RBPmap
28	chr6:42048736	gargag	gaagag	3.87	5.44e-05	HNRNPH1	4.2644	CCND3	CCND3:E041	RBPmap
171	chr8:140735215	ccccacccc	ccccacccc	3.869	5.46e-05	CBP2	4.26281	PTK2	PTK2:E049	RBPmap
28	chr11:85019236	ccaaauu	caaaaau	3.868	5.49e-05	HNRNPR	4.26043	HNRNPC	HNRNPC:E012	CisRBP
29	chr11:85019237	ccaaauu	aaaaauu	3.868	5.49e-05	HNRNPR	4.26043	HNRNPC	HNRNPC:E012	CisRBP
176	chr14:21263168	uucauaa	aucauca	3.867	5.51e-05	NOVA1	4.25885	HNRNPC	HNRNPC:E056	RBPmap
177	chr3:48693697	amayama	ccacaca	3.867	5.51e-05	HNRNPL	4.25885	IP6K2	IP6K2:E019	RBPmap
112	chr1:52991935	amayama	aaacaca	3.867	5.51e-05	HNRNPL	4.25885	RRAS2	RRAS2:E003	RBPmap
152	chr1:52992949	uauguau	uguguau	3.867	5.51e-05	FUBP1	4.25885	RRAS2	RRAS2:E005	RBPmap
3	chr16:1414058	amahwca	acaaaca	3.866	5.53e-05	IGF2BP3	4.25727	UNKL	UNKL:E045	RBPmap
70	chr6:41941021	rygcgcb	gcgcgcg	3.865	5.55e-05	RBM8A	4.25571	CCND3	CCND3:E024	RBPmap
30	chr14:21211839	uuuycc	uuuucc	3.865	5.55e-05	CBP3	4.25571	HNRNPC	HNRNPC:E024	RBPmap
90	chr3:48694434	auuaau	auuaau	3.865	5.55e-05	ZCRB1	4.25571	IP6K2	IP6K2:E027	RBPmap
72	chr14:21263654	agaaaaa	aaaaaaa	3.864	5.58e-05	PABPC1	4.25337	HNRNPC	HNRNPC:E059	CisRBP
73	chr14:21263655	agaaaaa	aaaaaaa	3.864	5.58e-05	PABPC1	4.25337	HNRNPC	HNRNPC:E059	CisRBP
74	chr14:21263656	agaaaaa	aaaaaaa	3.864	5.58e-05	PABPC1	4.25337	HNRNPC	HNRNPC:E059	CisRBP
75	chr14:21263657	agaaaaa	aaaaaaa	3.864	5.58e-05	PABPC1	4.25337	HNRNPC	HNRNPC:E059	CisRBP
20	chr14:21263602	agaaaau	agaaauu	3.864	5.58e-05	PABPC5	4.25337	HNRNPC	HNRNPC:E059	CisRBP
20	chr14:21263602	agaaadu	agaaauu	3.864	5.58e-05	ABPC5	4.25337	HNRNPC	HNRNPC:E059	RBPmap
370	chr8:140658269	aaaaaar	aaaaaag	3.864	5.58e-05	ABPC4	4.25337	PTK2	PTK2:E001	RBPmap
217	chr7:105116593	auauau	auauac	3.864	5.58e-05	RBMS3	4.25337	SRPK2	SRPK2:E005	RBPmap
134	chr16:1385341	gckgghm	gcugggg	3.864	5.58e-05	SAMD4A	4.25337	UNKL	UNKL:E026	RBPmap
367	chr8:140658266	araaaam	aaaaaaa	3.863	5.6e-05	ABPC1	4.25181	PTK2	PTK2:E001	RBPmap
368	chr8:140658267	araaaam	aaaaaaa	3.863	5.6e-05	ABPC1	4.25181	PTK2	PTK2:E001	RBPmap
369	chr8:140658268	araaaam	aaaaaaa	3.863	5.6e-05	ABPC1	4.25181	PTK2	PTK2:E001	RBPmap
228	chr8:140717937	araaaam	agaaaaa	3.863	5.6e-05	ABPC1	4.25181	PTK2	PTK2:E043	RBPmap
228	chr8:140717937	araaaam	agaaaaa	3.863	5.6e-05	SART3	4.25181	PTK2	PTK2:E043	RBPmap
2	chr16:1414722	gcgcgcg	ccgcgcc	3.861	5.65e-05	PPRC1	4.24795	UNKL	UNKL:E050	CisRBP
15	chr7:105146507	gragga	ggagga	3.86	5.67e-05	SRSF1	4.24642	SRPK2	SRPK2:E028	RBPmap
18	chr7:105146510	gragga	ggagga	3.86	5.67e-05	SRSF1	4.24642	SRPK2	SRPK2:E028	RBPmap
43	chr6:41941809	ssgcgcs	aggcgcc	3.859	5.69e-05	RC1	4.24489	CCND3	CCND3:E029	RBPmap
162	chr8:140735448	acacag	acacac	3.859	5.69e-05	CNOT4	4.24489	PTK2	PTK2:E051	RBPmap
32	chr8:17755043	aacauca	aaccuca	3.857	5.74e-05	CSDA	4.24109	MTUS1	MTUS1:E063	CisRBP
104	chr14:21262872	aaaauaa	aaaacaa	3.857	5.74e-05	NUPL2	4.24109	HNRNPC	HNRNPC:E055	RBPmap
227	chr7:105116603	auauaa	auauau	3.857	5.74e-05	RBMS2	4.24109	SRPK2	SRPK2:E005	RBPmap
24	chr3:48694549	aauaaa	aauaaa	3.856	5.76e-05	KHDRBS3	4.23958	IP6K2	IP6K2:E029	RBPmap
44	chr6:41941810	cgcgc	ggcgc	3.855	5.79e-05	FUS	4.23732	CCND3	CCND3:E029	RBPmap
177	chr1:52993145	agagavm	agagaag	3.855	5.79e-05	SRSF10	4.23732	RRAS2	RRAS2:E007	RBPmap
376	chr11:14359138	cgcgc	agcgc	3.855	5.79e-05	FUS	4.23732	RRAS2	RRAS2:E023	RBPmap
49	chr6:41940458	agcagc	agcagc	3.854	5.81e-05	SRSF8	4.23582	CCND3	CCND3:E021	RBPmap
36	chr8:140658665	hauaua	uauaua	3.854	5.81e-05	RBMS3	4.23582	PTK2	PTK2:E006	RBPmap
296	chr14:21263288	araaaam	aaaaaaa	3.853	5.83e-05	SART3	4.23433	HNRNPC	HNRNPC:E056	RBPmap
297	chr14:21263289	araaaam	aaaaaaa	3.853	5.83e-05	SART3	4.23433	HNRNPC	HNRNPC:E056	RBPmap
298	chr14:21263290	araaaam	aaaaaaa	3.853	5.83e-05	SART3	4.23433	HNRNPC	HNRNPC:E056	RBPmap
111	chr3:48694982	gagug	gagug	3.853	5.83e-05	TARDBP	4.23433	IP6K2	IP6K2:E035	RBPmap
196	chr8:140659268	gaaaacc	aaaaaca	3.852	5.86e-05	PABPC3	4.2321	PTK2	PTK2:E008	CisRBP
44	chr8:17715810	caaagg	caaagg	3.852	5.86e-05	NUPL2	4.2321	MTUS1	MTUS1:E049	RBPmap
7	chr8:140700776	guaguagu	guaguugu	3.852	5.86e-05	HNRNPA1	4.2321	PTK2	PTK2:E029	RBPmap
55	chr11:14278736	guaguagu	guaguaac	3.852	5.86e-05	HNRNPA1	4.2321	RRAS2	RRAS2:E004	RBPmap
157	chr1:52992954	auauau	auauag	3.852	5.86e-05	RBMS3	4.2321	RRAS2	RRAS2:E005	RBPmap
887	chr16:1364092	amahwca	aaaaaca	3.851	5.88e-05	IGF2BP3	4.23062	UNKL	UNKL:E002	RBPmap
364	chr11:14359126	gcgcgu	acgcgu	3.849	5.93e-05	RBM4	4.22695	RRAS2	RRAS2:E023	RBPmap
3	chr16:1414058	vmahwca	acaaaca	3.849	5.93e-05	IGF2BP2	4.22695	UNKL	UNKL:E045	RBPmap
1	chr16:1414721	ssagcgm	gccgcgc	3.849	5.93e-05	ZC3H10	4.22695	UNKL	UNKL:E050	RBPmap
1253	chr8:17645056	uagauag	caguuag	3.848	5.95e-05	HNRPDL	4.22548	MTUS1	MTUS1:E003	CisRBP
47	chr8:141000984	cgccg	cgccg	3.848	5.95e-05	EIF4G2	4.22548	PTK2	PTK2:E139	RBPmap
81	chr16:1367793	gggagggg	gggagggg	3.848	5.95e-05	HNRNPF	4.22548	UNKL	UNKL:E014	RBPmap
1	chr3:48694771	auccccc	uuccccc	3.847	5.98e-05	CBP4	4.2233	IP6K2	IP6K2:E033	RBPmap
226	chr7:105116602	uauauag	uauauau	3.847	5.98e-05	DAZAP1	4.2233	SRPK2	SRPK2:E005	RBPmap
95	chr11:85021632	bguusku	uguuggu	3.846	6e-05	ZNF638	4.22185	HNRNPC	HNRNPC:E045	RBPmap
14	chr14:21211320	acacaaa	acacaaa	3.845	6.03e-05	ENSG00000215042	4.21968	HNRNPC	HNRNPC:E018	CisRBP
194	chr8:140659266	aaaaaar	aaaaaaa	3.845	6.03e-05	ABPC4	4.21968	PTK2	PTK2:E008	RBPmap
20	chr8:140764280	aucaacg	aucaucu	3.844	6.05e-05	SRSF3	4.21824	PTK2	PTK2:E074	CisRBP
99	chr3:48694443	auuaau	uuuaau	3.844	6.05e-05	ZCRB1	4.21824	IP6K2	IP6K2:E027	RBPmap
32	chr8:17755043	aacaucd	aaccuca	3.844	6.05e-05	YBX1	4.21824	MTUS1	MTUS1:E063	RBPmap
228	chr7:105116604	hauaua	uauauu	3.844	6.05e-05	RBMS3	4.21824	SRPK2	SRPK2:E005	RBPmap
41	chr16:1366318	hrkacag	cugacag	3.844	6.05e-05	ENOX1	4.21824	UNKL	UNKL:E009	RBPmap
81	chr16:1367793	gggugggg	gggagggg	3.844	6.05e-05	ILF2	4.21824	UNKL	UNKL:E014	RBPmap
177	chr1:52993145	agagaaa	agagaag	3.843	6.08e-05	Fusip1	4.2161	RRAS2	RRAS2:E007	CisRBP
782	chr16:1365793	agaaaaa	aaaaaaa	3.843	6.08e-05	PABPC1	4.2161	UNKL	UNKL:E006	CisRBP
783	chr16:1365794	agaaaaa	aaaaaaa	3.843	6.08e-05	PABPC1	4.2161	UNKL	UNKL:E006	CisRBP
784	chr16:1365795	agaaaaa	aaaaaaa	3.843	6.08e-05	PABPC1	4.2161	UNKL	UNKL:E006	CisRBP
175	chr14:21210787	caacaca	acacaca	3.843	6.08e-05	IGF2BP2	4.2161	HNRNPC	HNRNPC:E007	RBPmap
296	chr14:21263288	araaaam	aaaaaaa	3.843	6.08e-05	ABPC1	4.2161	HNRNPC	HNRNPC:E056	RBPmap
297	chr14:21263289	araaaam	aaaaaaa	3.843	6.08e-05	ABPC1	4.2161	HNRNPC	HNRNPC:E056	RBPmap
298	chr14:21263290	araaaam	aaaaaaa	3.843	6.08e-05	ABPC1	4.2161	HNRNPC	HNRNPC:E056	RBPmap
5	chr14:21263341	araaaam	aaaaaaa	3.843	6.08e-05	ABPC1	4.2161	HNRNPC	HNRNPC:E058	RBPmap
11	chr14:21263347	araaaam	acaaaaa	3.843	6.08e-05	ABPC1	4.2161	HNRNPC	HNRNPC:E058	RBPmap
5	chr14:21263341	araaaam	aaaaaaa	3.843	6.08e-05	SART3	4.2161	HNRNPC	HNRNPC:E058	RBPmap
11	chr14:21263347	araaaam	acaaaaa	3.843	6.08e-05	SART3	4.2161	HNRNPC	HNRNPC:E058	RBPmap
55	chr8:17645716	uuuuubk	uuuuugg	3.843	6.08e-05	TIA1	4.2161	MTUS1	MTUS1:E004	RBPmap
38	chr8:17722027	caacaca	cuacaca	3.843	6.08e-05	IGF2BP2	4.2161	MTUS1	MTUS1:E052	RBPmap
102	chr8:140669837	caacaca	aaacaca	3.843	6.08e-05	IGF2BP2	4.2161	PTK2	PTK2:E021	RBPmap
782	chr16:1365793	araaaam	aaaaaaa	3.843	6.08e-05	SART3	4.2161	UNKL	UNKL:E006	RBPmap
783	chr16:1365794	araaaam	aaaaaaa	3.843	6.08e-05	SART3	4.2161	UNKL	UNKL:E006	RBPmap
784	chr16:1365795	araaaam	aaaaaaa	3.843	6.08e-05	SART3	4.2161	UNKL	UNKL:E006	RBPmap
16	chr11:85019224	ccaaauu	caaaauu	3.842	6.1e-05	HNRNPR	4.21467	HNRNPC	HNRNPC:E012	CisRBP
11	chr3:48694835	uacaca	aacaca	3.842	6.1e-05	HNRNPL	4.21467	IP6K2	IP6K2:E034	RBPmap
4	chr8:17675991	uacaca	aauaca	3.842	6.1e-05	HNRNPL	4.21467	MTUS1	MTUS1:E031	RBPmap
35	chr8:140658664	auauau	uuauau	3.841	6.13e-05	RBMS3	4.21254	PTK2	PTK2:E006	RBPmap
55	chr7:105306490	raaaacm	aaaaacc	3.841	6.13e-05	ABPC3	4.21254	SRPK2	SRPK2:E046	RBPmap
18	chr3:48689555	amayama	gcacacc	3.84	6.15e-05	HNRNPL	4.21112	IP6K2	IP6K2:E002	RBPmap
102	chr8:140669837	amayama	aaacaca	3.84	6.15e-05	HNRNPL	4.21112	PTK2	PTK2:E021	RBPmap
174	chr8:140890489	wuacwuk	uuacauu	3.84	6.15e-05	RBM41	4.21112	PTK2	PTK2:E113	RBPmap
34	chr17:76038818	wuacwuk	uuacauu	3.84	6.15e-05	RBM41	4.21112	SRP68	SRP68:E002	RBPmap
109	chr7:105142445	cuuucu	uuuucu	3.84	6.15e-05	TB3	4.21112	SRPK2	SRPK2:E024	RBPmap
33	chr8:140746893	uuuuuub	uuuuuuu	3.839	6.18e-05	RALY	4.20901	PTK2	PTK2:E066	RBPmap
34	chr8:140746894	uuuuuub	uuuuuuu	3.839	6.18e-05	RALY	4.20901	PTK2	PTK2:E066	RBPmap
35	chr8:140746895	uuuuuub	uuuuuuu	3.839	6.18e-05	RALY	4.20901	PTK2	PTK2:E066	RBPmap
29	chr8:140746889	uuuuuuuuu	uuucuuuuu	3.839	6.18e-05	RBM24	4.20901	PTK2	PTK2:E066	RBPmap
30	chr8:140746890	uuuuuuuuu	uucuuuuuu	3.839	6.18e-05	RBM24	4.20901	PTK2	PTK2:E066	RBPmap
31	chr8:140746891	uuuuuuuuu	ucuuuuuuu	3.839	6.18e-05	RBM24	4.20901	PTK2	PTK2:E066	RBPmap
32	chr8:140746892	uuuuuuuuu	cuuuuuuuu	3.839	6.18e-05	RBM24	4.20901	PTK2	PTK2:E066	RBPmap
112	chr7:105142448	acuuucu	ucuuucu	3.838	6.2e-05	ROD1	4.20761	SRPK2	SRPK2:E024	CisRBP
200	chr6:41941719	rygcgcb	gcgcggg	3.838	6.2e-05	RBM8A	4.20761	CCND3	CCND3:E027	RBPmap
207	chr6:41941726	rygcgcb	gcgcggg	3.838	6.2e-05	RBM8A	4.20761	CCND3	CCND3:E027	RBPmap
374	chr14:21209509	aacauca	aacauca	3.837	6.23e-05	YB-1	4.20551	HNRNPC	HNRNPC:E001	CisRBP
7	chr8:140764267	uaauc	uaauc	3.837	6.23e-05	SF1	4.20551	PTK2	PTK2:E074	RBPmap
18	chr8:140764278	uaauc	uaauc	3.837	6.23e-05	SF1	4.20551	PTK2	PTK2:E074	RBPmap
1710	chr8:17645513	ccccacccc	ccccccacc	3.836	6.25e-05	CBP2	4.20412	MTUS1	MTUS1:E003	RBPmap
74	chr11:14278755	guaguagu	uaagcagu	3.836	6.25e-05	HNRNPA1	4.20412	RRAS2	RRAS2:E004	RBPmap
8	chr7:105116384	aaaaaar	aaaaaac	3.836	6.25e-05	ABPC4	4.20412	SRPK2	SRPK2:E005	RBPmap
70	chr6:41941021	gcgcgcg	gcgcgcg	3.835	6.28e-05	PPRC1	4.20204	CCND3	CCND3:E024	CisRBP
6	chr6:41941772	gcgcgcg	ccgcccg	3.835	6.28e-05	PPRC1	4.20204	CCND3	CCND3:E029	CisRBP
13	chr6:41941779	gcgcgcg	ccgcccg	3.835	6.28e-05	PPRC1	4.20204	CCND3	CCND3:E029	CisRBP
367	chr8:140658266	agaaaaa	aaaaaaa	3.835	6.28e-05	PABPC1	4.20204	PTK2	PTK2:E001	CisRBP
368	chr8:140658267	agaaaaa	aaaaaaa	3.835	6.28e-05	PABPC1	4.20204	PTK2	PTK2:E001	CisRBP
369	chr8:140658268	agaaaaa	aaaaaaa	3.835	6.28e-05	PABPC1	4.20204	PTK2	PTK2:E001	CisRBP
228	chr8:140717937	agaaaaa	agaaaaa	3.835	6.28e-05	PABPC1	4.20204	PTK2	PTK2:E043	CisRBP
94	chr3:48695515	rcahaca	acaaaca	3.835	6.28e-05	HNRPLL	4.20204	IP6K2	IP6K2:E041	RBPmap
265	chr6:41941426	gggaggg	gggaggg	3.833	6.33e-05	HNRNPH2	4.1986	CCND3	CCND3:E025	RBPmap
1277	chr14:21210412	kurrukk	guguugu	3.833	6.33e-05	SFPQ	4.1986	HNRNPC	HNRNPC:E001	RBPmap
2	chr3:48694527	aauaaa	uauaaa	3.833	6.33e-05	KHDRBS3	4.1986	IP6K2	IP6K2:E029	RBPmap
14	chr3:48694539	aauaaa	uauaaa	3.833	6.33e-05	KHDRBS3	4.1986	IP6K2	IP6K2:E029	RBPmap
95	chr8:140890698	kkguguk	gugugug	3.833	6.33e-05	RBM38	4.1986	PTK2	PTK2:E116	RBPmap
782	chr16:1365793	araaaam	aaaaaaa	3.833	6.33e-05	ABPC1	4.1986	UNKL	UNKL:E006	RBPmap
783	chr16:1365794	araaaam	aaaaaaa	3.833	6.33e-05	ABPC1	4.1986	UNKL	UNKL:E006	RBPmap
784	chr16:1365795	araaaam	aaaaaaa	3.833	6.33e-05	ABPC1	4.1986	UNKL	UNKL:E006	RBPmap
217	chr6:41941736	cgcgc	ggcgc	3.831	6.38e-05	FUS	4.19518	CCND3	CCND3:E027	RBPmap
223	chr6:41941742	cgcgc	ggcgc	3.831	6.38e-05	FUS	4.19518	CCND3	CCND3:E027	RBPmap
5	chr14:21263341	aaaauaa	aaaaaaa	3.831	6.38e-05	NUPL2	4.19518	HNRNPC	HNRNPC:E058	RBPmap
154	chr17:76041132	acacrav	acacuag	3.831	6.38e-05	HNRNPL	4.19518	SRP68	SRP68:E009	RBPmap
11	chr7:105389254	cgcgc	cgcgc	3.831	6.38e-05	FUS	4.19518	SRPK2	SRPK2:E051	RBPmap
9	chr11:14337009	gaaaacc	gaaaaac	3.83	6.41e-05	PABPC3	4.19314	RRAS2	RRAS2:E017	CisRBP
55	chr7:105306490	gaaaacc	aaaaacc	3.83	6.41e-05	PABPC3	4.19314	SRPK2	SRPK2:E046	CisRBP
42	chr8:17645703	uuuuuub	uuuuuua	3.83	6.41e-05	RALY	4.19314	MTUS1	MTUS1:E004	RBPmap
89	chr8:140890404	uaauua	uaauua	3.83	6.41e-05	A1CF	4.19314	PTK2	PTK2:E113	RBPmap
310	chr6:41935294	grhuuaa	caauuaa	3.829	6.43e-05	ZCRB1	4.19179	CCND3	CCND3:E004	RBPmap
238	chr7:105143321	uuuuuyc	uuuuucc	3.829	6.43e-05	U2AF2	4.19179	SRPK2	SRPK2:E025	RBPmap
1275	chr8:140669699	hrkacag	cagacac	3.828	6.46e-05	ENOX1	4.18977	PTK2	PTK2:E019	RBPmap
12	chr14:21263348	caaaaag	caaaaau	3.827	6.49e-05	SYNCRIP	4.18776	HNRNPC	HNRNPC:E058	CisRBP
202	chr6:41941721	gckgghm	gcggggc	3.827	6.49e-05	SAMD4A	4.18776	CCND3	CCND3:E027	RBPmap
77	chr14:21263659	aaaaaar	aaaaaca	3.827	6.49e-05	ABPC4	4.18776	HNRNPC	HNRNPC:E059	RBPmap
102	chr8:140721760	cuuucu	cuuucu	3.827	6.49e-05	TB3	4.18776	PTK2	PTK2:E048	RBPmap
101	chr17:76048071	amayama	acacaaa	3.827	6.49e-05	HNRNPL	4.18776	SRP68	SRP68:E017	RBPmap
128	chr6:41936323	ccawmcc	ccacucc	3.826	6.51e-05	HNRNPK	4.18642	CCND3	CCND3:E007	RBPmap
71	chr6:41941590	gcgcgg	ccgcgg	3.826	6.51e-05	RBM4B	4.18642	CCND3	CCND3:E027	RBPmap
209	chr6:41941728	gcgcgg	gcgggu	3.826	6.51e-05	RBM4B	4.18642	CCND3	CCND3:E027	RBPmap
1279	chr8:140669703	gacaga	cacaca	3.826	6.51e-05	CNOT4	4.18642	PTK2	PTK2:E019	RBPmap
9	chr8:141001294	gcgcgg	gcgggc	3.826	6.51e-05	RBM4B	4.18642	PTK2	PTK2:E150	RBPmap
32	chr8:17755043	aacauca	aaccuca	3.825	6.54e-05	YB-1	4.18442	MTUS1	MTUS1:E063	CisRBP
93	chr14:21262861	auaaaav	uuaaaaa	3.825	6.54e-05	KHDRBS1	4.18442	HNRNPC	HNRNPC:E055	RBPmap
29	chr8:140746889	uuuduuu	uuucuuu	3.825	6.54e-05	ZC3H14	4.18442	PTK2	PTK2:E066	RBPmap
325	chr17:76039875	gguugguu	gcuugcuu	3.825	6.54e-05	HNRNP	4.18442	SRP68	SRP68:E005	RBPmap
15	chr14:21263325	araaaam	aaaaaaa	3.824	6.57e-05	SART3	4.18243	HNRNPC	HNRNPC:E057	RBPmap
35	chr14:21263371	araaaam	agaaaaa	3.824	6.57e-05	ABPC1	4.18243	HNRNPC	HNRNPC:E058	RBPmap
35	chr14:21263371	araaaam	agaaaaa	3.824	6.57e-05	SART3	4.18243	HNRNPC	HNRNPC:E058	RBPmap
33	chr8:140746893	uuuuubk	uuuuuuu	3.824	6.57e-05	TIA1	4.18243	PTK2	PTK2:E066	RBPmap
34	chr8:140746894	uuuuubk	uuuuuuu	3.824	6.57e-05	TIA1	4.18243	PTK2	PTK2:E066	RBPmap
35	chr8:140746895	uuuuubk	uuuuuuu	3.824	6.57e-05	TIA1	4.18243	PTK2	PTK2:E066	RBPmap
28	chr11:14358284	gcgcgss	gcgcggg	3.824	6.57e-05	RBM4	4.18243	RRAS2	RRAS2:E022	RBPmap
94	chr3:48695515	acacaca	acaaaca	3.823	6.59e-05	hnRNPLL	4.18111	IP6K2	IP6K2:E041	CisRBP
11	chr14:21209146	auuua	auuua	3.823	6.59e-05	TRNAU1AP	4.18111	HNRNPC	HNRNPC:E001	RBPmap
28	chr8:140746888	uuuuuuuuu	cuuucuuuu	3.823	6.59e-05	RBM24	4.18111	PTK2	PTK2:E066	RBPmap
94	chr3:48694965	garggwr	gagggag	3.821	6.65e-05	RBM5	4.17718	IP6K2	IP6K2:E035	RBPmap
1282	chr8:140669706	acacag	acaaag	3.821	6.65e-05	CNOT4	4.17718	PTK2	PTK2:E019	RBPmap
1278	chr8:140669702	amahwca	acacaca	3.821	6.65e-05	IGF2BP3	4.17718	PTK2	PTK2:E019	RBPmap
14	chr16:1414711	ssgcgcs	gcgcgca	3.821	6.65e-05	RC1	4.17718	UNKL	UNKL:E049	RBPmap
370	chr8:140658269	aaaaaaa	aaaaaag	3.82	6.67e-05	PABPC4	4.17587	PTK2	PTK2:E001	CisRBP
3	chr8:140846262	cgauacu	uaauacu	3.82	6.67e-05	STAR-PAP	4.17587	PTK2	PTK2:E099	CisRBP
119	chr6:41936314	ccccacccc	cccccaccc	3.82	6.67e-05	CBP2	4.17587	CCND3	CCND3:E007	RBPmap
3	chr8:140846262	mrauacu	uaauacu	3.82	6.67e-05	TUT1	4.17587	PTK2	PTK2:E099	RBPmap
28	chr14:21211837	uuuuuyc	uuuuuuc	3.819	6.7e-05	U2AF2	4.17393	HNRNPC	HNRNPC:E024	RBPmap
298	chr8:140658927	uauauag	aauauag	3.819	6.7e-05	DAZAP1	4.17393	PTK2	PTK2:E006	RBPmap
103	chr14:21262871	aaaaaar	aaaaaca	3.818	6.73e-05	ABPC4	4.17198	HNRNPC	HNRNPC:E055	RBPmap
15	chr14:21263325	aaaauaa	aaaaaaa	3.818	6.73e-05	NUPL2	4.17198	HNRNPC	HNRNPC:E057	RBPmap
76	chr14:21263658	aaaaaar	aaaaaac	3.818	6.73e-05	ABPC4	4.17198	HNRNPC	HNRNPC:E059	RBPmap
9	chr11:14337009	raaaacm	gaaaaac	3.818	6.73e-05	ABPC3	4.17198	RRAS2	RRAS2:E017	RBPmap
154	chr17:76041132	acacaaa	acacuag	3.817	6.75e-05	ENSG00000215042	4.1707	SRP68	SRP68:E009	CisRBP
296	chr14:21263288	agaaaaa	aaaaaaa	3.816	6.78e-05	PABPC1	4.16877	HNRNPC	HNRNPC:E056	CisRBP
297	chr14:21263289	agaaaaa	aaaaaaa	3.816	6.78e-05	PABPC1	4.16877	HNRNPC	HNRNPC:E056	CisRBP
298	chr14:21263290	agaaaaa	aaaaaaa	3.816	6.78e-05	PABPC1	4.16877	HNRNPC	HNRNPC:E056	CisRBP
5	chr14:21263341	agaaaaa	aaaaaaa	3.816	6.78e-05	PABPC1	4.16877	HNRNPC	HNRNPC:E058	CisRBP
11	chr14:21263347	agaaaaa	acaaaaa	3.816	6.78e-05	PABPC1	4.16877	HNRNPC	HNRNPC:E058	CisRBP
130	chr14:21230496	rausawd	aaucauu	3.816	6.78e-05	RBM46	4.16877	HNRNPC	HNRNPC:E036	RBPmap
26	chr8:17653211	chuuuuu	cuuuuuu	3.816	6.78e-05	CPEB2	4.16877	MTUS1	MTUS1:E014	RBPmap
247	chr3:48693767	bguusku	uguucuu	3.815	6.81e-05	ZNF638	4.16685	IP6K2	IP6K2:E019	RBPmap
75	chr8:140890390	acuaay	acuaau	3.815	6.81e-05	QKI	4.16685	PTK2	PTK2:E113	RBPmap
15	chr14:21263325	araaaam	aaaaaaa	3.814	6.84e-05	ABPC1	4.16494	HNRNPC	HNRNPC:E057	RBPmap
75	chr3:48693254	uuuduuu	uuuguuu	3.814	6.84e-05	ZC3H14	4.16494	IP6K2	IP6K2:E012	RBPmap
11	chr8:17723844	araaaam	aaaaaaa	3.814	6.84e-05	SART3	4.16494	MTUS1	MTUS1:E058	RBPmap
12	chr8:17723845	araaaam	aaaaaaa	3.814	6.84e-05	SART3	4.16494	MTUS1	MTUS1:E058	RBPmap
50	chr8:140770849	caacaca	caauaca	3.814	6.84e-05	IGF2BP2	4.16494	PTK2	PTK2:E084	RBPmap
126	chr11:14358382	gcgcgg	gcgcgg	3.814	6.84e-05	RBM4B	4.16494	RRAS2	RRAS2:E022	RBPmap
135	chr17:76041113	caacaca	caaaaca	3.814	6.84e-05	IGF2BP2	4.16494	SRP68	SRP68:E009	RBPmap
140	chr17:76041118	caacaca	caaaaca	3.814	6.84e-05	IGF2BP2	4.16494	SRP68	SRP68:E009	RBPmap
150	chr17:76041128	caacaca	caaaaca	3.814	6.84e-05	IGF2BP2	4.16494	SRP68	SRP68:E009	RBPmap
1282	chr8:140669706	amayama	acaaaga	3.813	6.86e-05	HNRNPL	4.16368	PTK2	PTK2:E019	RBPmap
224	chr7:105143307	uukruuu	uuuguuu	3.813	6.86e-05	HuR	4.16368	SRPK2	SRPK2:E025	RBPmap
8	chr7:105203701	ugugdkg	ugugggg	3.813	6.86e-05	BRUNOL6	4.16368	SRPK2	SRPK2:E038	RBPmap
203	chr14:21263195	aacauca	aucacca	3.812	6.89e-05	YB-1	4.16178	HNRNPC	HNRNPC:E056	CisRBP
273	chr8:17723513	huuuuuk	auuuuuu	3.812	6.89e-05	HNRNPC	4.16178	MTUS1	MTUS1:E056	RBPmap
1383	chr14:21210518	aauaaa	aauaaa	3.811	6.92e-05	KHDRBS3	4.15989	HNRNPC	HNRNPC:E001	RBPmap
39	chr14:21211848	uuuycc	uuuucc	3.811	6.92e-05	CBP3	4.15989	HNRNPC	HNRNPC:E024	RBPmap
166	chr8:141001103	rygcgcb	gcgcccg	3.811	6.92e-05	RBM8A	4.15989	PTK2	PTK2:E139	RBPmap
10	chr16:1414730	rygcgcb	gcgcccc	3.811	6.92e-05	RBM8A	4.15989	UNKL	UNKL:E050	RBPmap
77	chr8:17723317	auugcaca	auuccaca	3.81	6.95e-05	SNRPB2	4.15802	MTUS1	MTUS1:E056	CisRBP
1263	chr8:17645066	auuaguu	guuaguu	3.81	6.95e-05	MSI1	4.15802	MTUS1	MTUS1:E003	RBPmap
329	chr17:76039879	gguugguu	gcuuggug	3.81	6.95e-05	HNRNP	4.15802	SRP68	SRP68:E005	RBPmap
95	chr14:21262863	aaaaaar	aaaaaua	3.809	6.98e-05	ABPC4	4.15614	HNRNPC	HNRNPC:E055	RBPmap
102	chr14:21262870	aaaaaar	aaaaaac	3.809	6.98e-05	ABPC4	4.15614	HNRNPC	HNRNPC:E055	RBPmap
109	chr14:21262877	aaaaaar	aaaaaua	3.809	6.98e-05	ABPC4	4.15614	HNRNPC	HNRNPC:E055	RBPmap
125	chr14:21262893	aaaaaar	aaaaaua	3.809	6.98e-05	ABPC4	4.15614	HNRNPC	HNRNPC:E055	RBPmap
54	chr7:105306489	aaaaaar	aaaaaac	3.809	6.98e-05	ABPC4	4.15614	SRPK2	SRPK2:E046	RBPmap
171	chr8:141001108	gcgcgcg	cggcgcc	3.808	7e-05	PPRC1	4.1549	PTK2	PTK2:E139	CisRBP
72	chr6:41941023	ssgcgcs	gcgcgcc	3.808	7e-05	RC1	4.1549	CCND3	CCND3:E024	RBPmap
5	chr8:17675992	acacag	auacag	3.808	7e-05	CNOT4	4.1549	MTUS1	MTUS1:E031	RBPmap
241	chr8:17697497	acacag	acacag	3.808	7e-05	CNOT4	4.1549	MTUS1	MTUS1:E046	RBPmap
171	chr8:141001108	ssgcgcs	cggcgcc	3.808	7e-05	RC1	4.1549	PTK2	PTK2:E139	RBPmap
114	chr1:52991937	acacag	acacaa	3.808	7e-05	CNOT4	4.1549	RRAS2	RRAS2:E003	RBPmap
48	chr7:105388838	acgacg	cgcgac	3.808	7e-05	SRSF7	4.1549	SRPK2	SRPK2:E048	RBPmap
887	chr16:1364092	vmahwca	aaaaaca	3.808	7e-05	IGF2BP2	4.1549	UNKL	UNKL:E002	RBPmap
6	chr17:76060396	agagaaa	agagaaa	3.807	7.03e-05	Fusip1	4.15304	SRP68	SRP68:E024	CisRBP
225	chr14:21263217	uaauua	uaauaa	3.807	7.03e-05	A1CF	4.15304	HNRNPC	HNRNPC:E056	RBPmap
228	chr14:21263220	uaauua	uaauaa	3.807	7.03e-05	A1CF	4.15304	HNRNPC	HNRNPC:E056	RBPmap
231	chr14:21263223	uaauua	uaauaa	3.807	7.03e-05	A1CF	4.15304	HNRNPC	HNRNPC:E056	RBPmap
103	chr8:17723936	amahwca	aaacaca	3.806	7.06e-05	IGF2BP3	4.1512	MTUS1	MTUS1:E058	RBPmap
877	chr16:1364082	amahwca	aaauaca	3.806	7.06e-05	IGF2BP3	4.1512	UNKL	UNKL:E002	RBPmap
11	chr8:17723844	araaaam	aaaaaaa	3.804	7.12e-05	ABPC1	4.14752	MTUS1	MTUS1:E058	RBPmap
12	chr8:17723845	araaaam	aaaaaaa	3.804	7.12e-05	ABPC1	4.14752	MTUS1	MTUS1:E058	RBPmap
1084	chr14:21210219	acacaaa	acaaaac	3.803	7.15e-05	ENSG00000215042	4.14569	HNRNPC	HNRNPC:E001	CisRBP
1099	chr14:21210234	acacaaa	acaaaac	3.803	7.15e-05	ENSG00000215042	4.14569	HNRNPC	HNRNPC:E001	CisRBP
265	chr6:41941426	gggggggg	gggagggg	3.803	7.15e-05	EWSR1	4.14569	CCND3	CCND3:E025	RBPmap
1084	chr14:21210219	acacrav	acaaaac	3.803	7.15e-05	HNRNPL	4.14569	HNRNPC	HNRNPC:E001	RBPmap
1099	chr14:21210234	acacrav	acaaaac	3.803	7.15e-05	HNRNPL	4.14569	HNRNPC	HNRNPC:E001	RBPmap
1255	chr8:17645058	auuaguu	guuaguu	3.803	7.15e-05	UNK	4.14569	MTUS1	MTUS1:E003	RBPmap
1259	chr8:17645062	auuaguu	guuaguu	3.803	7.15e-05	UNK	4.14569	MTUS1	MTUS1:E003	RBPmap
77	chr8:17676352	ccccacccc	ccccccacc	3.803	7.15e-05	CBP2	4.14569	MTUS1	MTUS1:E034	RBPmap
77	chr14:21263659	aaaaaaa	aaaaaca	3.802	7.18e-05	PABPC4	4.14388	HNRNPC	HNRNPC:E059	CisRBP
194	chr8:140659266	aaaaaaa	aaaaaaa	3.802	7.18e-05	PABPC4	4.14388	PTK2	PTK2:E008	CisRBP
127	chr6:41936022	gckgghm	gcugggc	3.802	7.18e-05	SAMD4A	4.14388	CCND3	CCND3:E006	RBPmap
2	chr14:21209137	wuacwuk	uuacaua	3.802	7.18e-05	RBM41	4.14388	HNRNPC	HNRNPC:E001	RBPmap
1269	chr8:17645072	uukruuu	uuguuuu	3.802	7.18e-05	HuR	4.14388	MTUS1	MTUS1:E003	RBPmap
73	chr8:140669808	auaaav	aauaaa	3.802	7.18e-05	KHDRBS3	4.14388	PTK2	PTK2:E021	RBPmap
121	chr14:21262889	rauaaam	aauuaaa	3.8	7.23e-05	KHDRBS2	4.14086	HNRNPC	HNRNPC:E055	RBPmap
371	chr8:140658270	aaaaaar	aaaaaga	3.8	7.23e-05	ABPC4	4.14086	PTK2	PTK2:E001	RBPmap
22	chr8:140744789	aaaaaar	gaaaaaa	3.8	7.23e-05	ABPC4	4.14086	PTK2	PTK2:E062	RBPmap
898	chr16:1364103	caacaca	uuacaca	3.8	7.23e-05	IGF2BP2	4.14086	UNKL	UNKL:E002	RBPmap
232	chr14:21263224	uauaag	aauaag	3.798	7.29e-05	RR3	4.13727	HNRNPC	HNRNPC:E056	RBPmap
273	chr8:17723513	huuuuuk	auuuuuu	3.798	7.29e-05	HNRNPCL1	4.13727	MTUS1	MTUS1:E056	RBPmap
217	chr7:105116593	auauaa	auauac	3.798	7.29e-05	RBMS2	4.13727	SRPK2	SRPK2:E005	RBPmap
43	chr6:41941809	gcgcgcg	aggcgcc	3.797	7.32e-05	PPRC1	4.13549	CCND3	CCND3:E029	CisRBP
179	chr14:21210791	acacaca	acauacu	3.797	7.32e-05	hnRNPLL	4.13549	HNRNPC	HNRNPC:E007	CisRBP
87	chr7:105142423	aucaacg	aucaucu	3.797	7.32e-05	SRSF3	4.13549	SRPK2	SRPK2:E024	CisRBP
179	chr14:21210791	rcahaca	acauacu	3.797	7.32e-05	HNRPLL	4.13549	HNRNPC	HNRNPC:E007	RBPmap
19	chr14:21263011	gggugggg	gggugggg	3.797	7.32e-05	ILF2	4.13549	HNRNPC	HNRNPC:E056	RBPmap
4	chr8:17675991	hrkacag	aauacag	3.797	7.32e-05	ENOX1	4.13549	MTUS1	MTUS1:E031	RBPmap
35	chr14:21263371	agaaaaa	agaaaaa	3.796	7.35e-05	PABPC1	4.13371	HNRNPC	HNRNPC:E058	CisRBP
21	chr8:141001306	gcgcgcg	gcgugcg	3.795	7.38e-05	PPRC1	4.13194	PTK2	PTK2:E150	CisRBP
249	chr14:21263241	uguaag	aguaac	3.795	7.38e-05	SFPQ	4.13194	HNRNPC	HNRNPC:E056	RBPmap
1255	chr8:17645058	auuagu	guuagu	3.795	7.38e-05	HNRNPA0	4.13194	MTUS1	MTUS1:E003	RBPmap
1259	chr8:17645062	auuagu	guuagu	3.795	7.38e-05	HNRNPA0	4.13194	MTUS1	MTUS1:E003	RBPmap
58	chr8:17715824	caaagg	aaaagg	3.795	7.38e-05	NUPL2	4.13194	MTUS1	MTUS1:E049	RBPmap
201	chr8:140659273	raaaacm	caaaaca	3.795	7.38e-05	ABPC3	4.13194	PTK2	PTK2:E008	RBPmap
100	chr8:140669835	vmahwca	aaaaaca	3.795	7.38e-05	IGF2BP2	4.13194	PTK2	PTK2:E021	RBPmap
16	chr8:141001301	cgcgc	cgcgc	3.795	7.38e-05	FUS	4.13194	PTK2	PTK2:E150	RBPmap
21	chr8:141001306	ssgcgcs	gcgugcg	3.795	7.38e-05	RC1	4.13194	PTK2	PTK2:E150	RBPmap
16	chr8:141001329	cgcgc	cgcgc	3.795	7.38e-05	FUS	4.13194	PTK2	PTK2:E151	RBPmap
6	chr17:76060396	agagavm	agagaaa	3.795	7.38e-05	SRSF10	4.13194	SRP68	SRP68:E024	RBPmap
123	chr14:21262891	auaaaav	uuaaaaa	3.794	7.41e-05	KHDRBS1	4.13018	HNRNPC	HNRNPC:E055	RBPmap
17	chr14:21263353	auaaaav	auaaaaa	3.794	7.41e-05	KHDRBS1	4.13018	HNRNPC	HNRNPC:E058	RBPmap
103	chr14:21262871	aaaaaaa	aaaaaca	3.793	7.44e-05	PABPC4	4.12843	HNRNPC	HNRNPC:E055	CisRBP
76	chr14:21263658	aaaaaaa	aaaaaac	3.793	7.44e-05	PABPC4	4.12843	HNRNPC	HNRNPC:E059	CisRBP
8	chr14:21263344	aaaauaa	aaaacaa	3.792	7.47e-05	NUPL2	4.12668	HNRNPC	HNRNPC:E058	RBPmap
18	chr8:140744785	aaaauaa	aaaagaa	3.792	7.47e-05	NUPL2	4.12668	PTK2	PTK2:E062	RBPmap
23	chr8:140744790	aaaauaa	aaaaaaa	3.792	7.47e-05	NUPL2	4.12668	PTK2	PTK2:E062	RBPmap
24	chr8:140744791	aaaauaa	aaaaaaa	3.792	7.47e-05	NUPL2	4.12668	PTK2	PTK2:E062	RBPmap
25	chr8:140744792	aaaauaa	aaaaaaa	3.792	7.47e-05	NUPL2	4.12668	PTK2	PTK2:E062	RBPmap
26	chr8:140744793	aaaauaa	aaaaaaa	3.792	7.47e-05	NUPL2	4.12668	PTK2	PTK2:E062	RBPmap
27	chr8:140744794	aaaauaa	aaaaaaa	3.792	7.47e-05	NUPL2	4.12668	PTK2	PTK2:E062	RBPmap
28	chr8:140744795	aaaauaa	aaaaaaa	3.792	7.47e-05	NUPL2	4.12668	PTK2	PTK2:E062	RBPmap
29	chr8:140744796	aaaauaa	aaaaaaa	3.792	7.47e-05	NUPL2	4.12668	PTK2	PTK2:E062	RBPmap
30	chr8:140744797	aaaauaa	aaaaaaa	3.792	7.47e-05	NUPL2	4.12668	PTK2	PTK2:E062	RBPmap
355	chr8:140658254	agaagac	agaagau	3.791	7.5e-05	PABPN1	4.12494	PTK2	PTK2:E001	CisRBP
786	chr16:1365797	aaaaaaa	aaaaaca	3.791	7.5e-05	PABPC4	4.12494	UNKL	UNKL:E006	CisRBP
6	chr8:17721995	aaaaaar	gaaaaaa	3.791	7.5e-05	ABPC4	4.12494	MTUS1	MTUS1:E052	RBPmap
14	chr8:17722003	aaaaaar	aaaaaau	3.791	7.5e-05	ABPC4	4.12494	MTUS1	MTUS1:E052	RBPmap
274	chr8:140662921	aaaaaar	aaaaaaa	3.791	7.5e-05	ABPC4	4.12494	PTK2	PTK2:E013	RBPmap
124	chr11:14358380	gcgcgss	gcgcgcg	3.791	7.5e-05	RBM4	4.12494	RRAS2	RRAS2:E022	RBPmap
128	chr11:14358384	gcgcgg	gcgggg	3.791	7.5e-05	RBM4B	4.12494	RRAS2	RRAS2:E022	RBPmap
786	chr16:1365797	aaaaaar	aaaaaca	3.791	7.5e-05	ABPC4	4.12494	UNKL	UNKL:E006	RBPmap
19	chr8:17723852	caaaaag	caaaaag	3.79	7.53e-05	SYNCRIP	4.12321	MTUS1	MTUS1:E058	CisRBP
77	chr3:48694948	gargag	gaggag	3.79	7.53e-05	HNRNPH1	4.12321	IP6K2	IP6K2:E035	RBPmap
80	chr3:48694951	gargag	gaggag	3.79	7.53e-05	HNRNPH1	4.12321	IP6K2	IP6K2:E035	RBPmap
89	chr3:48694960	gargag	gaggag	3.79	7.53e-05	HNRNPH1	4.12321	IP6K2	IP6K2:E035	RBPmap
215	chr7:105143298	uuuuuuuuu	uuuuuucuu	3.79	7.53e-05	RBM24	4.12321	SRPK2	SRPK2:E025	RBPmap
216	chr7:105143299	uuuuuuuuu	uuuuucuuu	3.79	7.53e-05	RBM24	4.12321	SRPK2	SRPK2:E025	RBPmap
222	chr7:105143305	uuuuuuuuu	uuuuuguuu	3.79	7.53e-05	RBM24	4.12321	SRPK2	SRPK2:E025	RBPmap
11	chr16:1379656	cgccg	cgccc	3.79	7.53e-05	EIF4G2	4.12321	UNKL	UNKL:E024	RBPmap
13	chr16:1379658	cgccg	ccccg	3.79	7.53e-05	EIF4G2	4.12321	UNKL	UNKL:E024	RBPmap
178	chr3:48693698	uacaca	cacaca	3.789	7.56e-05	HNRNPL	4.12148	IP6K2	IP6K2:E019	RBPmap
45	chr3:48693829	acacrav	acacaag	3.789	7.56e-05	HNRNPL	4.12148	IP6K2	IP6K2:E020	RBPmap
63	chr3:48694303	uacaca	uacaca	3.789	7.56e-05	HNRNPL	4.12148	IP6K2	IP6K2:E026	RBPmap
39	chr3:48694863	acacrav	acucaaa	3.789	7.56e-05	HNRNPL	4.12148	IP6K2	IP6K2:E034	RBPmap
42	chr8:140830517	aacauca	aacaucu	3.787	7.62e-05	YB-1	4.11805	PTK2	PTK2:E098	CisRBP
1673	chr8:17645476	amayama	agacaca	3.787	7.62e-05	HNRNPL	4.11805	MTUS1	MTUS1:E003	RBPmap
103	chr8:17723936	amayama	aaacaca	3.787	7.62e-05	HNRNPL	4.11805	MTUS1	MTUS1:E058	RBPmap
15	chr14:21263325	agaaaaa	aaaaaaa	3.786	7.65e-05	PABPC1	4.11634	HNRNPC	HNRNPC:E057	CisRBP
236	chr6:41941397	accgg	cccgg	3.786	7.65e-05	RBM22	4.11634	CCND3	CCND3:E025	RBPmap
152	chr14:21210764	caacaca	cagcaca	3.786	7.65e-05	IGF2BP2	4.11634	HNRNPC	HNRNPC:E007	RBPmap
5	chr3:48694876	caacaca	caacaaa	3.786	7.65e-05	IGF2BP2	4.11634	IP6K2	IP6K2:E035	RBPmap
8	chr3:48694879	caacaca	caaaaca	3.786	7.65e-05	IGF2BP2	4.11634	IP6K2	IP6K2:E035	RBPmap
755	chr16:1365766	auauaa	auauaa	3.786	7.65e-05	RBMS2	4.11634	UNKL	UNKL:E006	RBPmap
95	chr14:21262863	aaaaaaa	aaaaaua	3.784	7.72e-05	PABPC4	4.11238	HNRNPC	HNRNPC:E055	CisRBP
102	chr14:21262870	aaaaaaa	aaaaaac	3.784	7.72e-05	PABPC4	4.11238	HNRNPC	HNRNPC:E055	CisRBP
109	chr14:21262877	aaaaaaa	aaaaaua	3.784	7.72e-05	PABPC4	4.11238	HNRNPC	HNRNPC:E055	CisRBP
125	chr14:21262893	aaaaaaa	aaaaaua	3.784	7.72e-05	PABPC4	4.11238	HNRNPC	HNRNPC:E055	CisRBP
8	chr7:105116384	aaaaaaa	aaaaaac	3.784	7.72e-05	PABPC4	4.11238	SRPK2	SRPK2:E005	CisRBP
107	chr14:21262875	araaaam	acaaaaa	3.784	7.72e-05	SART3	4.11238	HNRNPC	HNRNPC:E055	RBPmap
1243	chr8:17645046	uuuduuu	uuucuuu	3.784	7.72e-05	ZC3H14	4.11238	MTUS1	MTUS1:E003	RBPmap
1272	chr8:17645075	uuuduuu	uuuuuuu	3.784	7.72e-05	ZC3H14	4.11238	MTUS1	MTUS1:E003	RBPmap
37	chr8:140658666	auauau	auauaa	3.784	7.72e-05	RBMS3	4.11238	PTK2	PTK2:E006	RBPmap
96	chr8:140721754	ucucu	ucucu	3.784	7.72e-05	UF60	4.11238	PTK2	PTK2:E048	RBPmap
203	chr7:105143286	uuuduuu	uuucuuu	3.784	7.72e-05	ZC3H14	4.11238	SRPK2	SRPK2:E025	RBPmap
218	chr7:105143301	uuuduuu	uuucuuu	3.784	7.72e-05	ZC3H14	4.11238	SRPK2	SRPK2:E025	RBPmap
206	chr14:21263198	uucauaa	accauca	3.783	7.75e-05	NOVA1	4.1107	HNRNPC	HNRNPC:E056	RBPmap
249	chr14:21263241	acuaay	aguaac	3.783	7.75e-05	QKI	4.1107	HNRNPC	HNRNPC:E056	RBPmap
785	chr16:1365796	aaaaaaa	aaaaaac	3.782	7.78e-05	PABPC4	4.10902	UNKL	UNKL:E006	CisRBP
5	chr3:48694245	aaaaaar	aaaaaaa	3.782	7.78e-05	ABPC4	4.10902	IP6K2	IP6K2:E026	RBPmap
21	chr8:140744788	aaaaaar	agaaaaa	3.782	7.78e-05	ABPC4	4.10902	PTK2	PTK2:E062	RBPmap
212	chr17:76041190	aauaaa	aauaaa	3.782	7.78e-05	KHDRBS2	4.10902	SRP68	SRP68:E009	RBPmap
2	chr7:105116378	aaaaaar	gaaaaaa	3.782	7.78e-05	ABPC4	4.10902	SRPK2	SRPK2:E005	RBPmap
785	chr16:1365796	aaaaaar	aaaaaac	3.782	7.78e-05	ABPC4	4.10902	UNKL	UNKL:E006	RBPmap
73	chr6:41941592	gcgcgu	gcgggu	3.781	7.81e-05	RBM4	4.10735	CCND3	CCND3:E027	RBPmap
92	chr8:140764513	hrkacag	caaacag	3.781	7.81e-05	ENOX1	4.10735	PTK2	PTK2:E080	RBPmap
15	chr1:52991838	kauauas	uauaaac	3.781	7.81e-05	RBMS1	4.10735	RRAS2	RRAS2:E003	RBPmap
11	chr17:76060401	hrkacag	aagacag	3.781	7.81e-05	ENOX1	4.10735	SRP68	SRP68:E024	RBPmap
7	chr16:1414727	ssagcgm	ccggcgc	3.781	7.81e-05	ZC3H10	4.10735	UNKL	UNKL:E050	RBPmap
205	chr6:41941724	gcgcgss	gggcgcg	3.78	7.84e-05	RBM4	4.10568	CCND3	CCND3:E027	RBPmap
219	chr14:21263211	uuaaca	uuaaua	3.78	7.84e-05	SF1	4.10568	HNRNPC	HNRNPC:E056	RBPmap
13	chr8:141001298	gcgcgss	gcccgcg	3.78	7.84e-05	RBM4	4.10568	PTK2	PTK2:E150	RBPmap
14	chr17:76061588	gargag	gaagag	3.78	7.84e-05	HNRNPH1	4.10568	SRP68	SRP68:E030	RBPmap
7	chr8:17721996	aaaauaa	aaaaaaa	3.779	7.87e-05	NUPL2	4.10403	MTUS1	MTUS1:E052	RBPmap
8	chr8:17721997	aaaauaa	aaaaaaa	3.779	7.87e-05	NUPL2	4.10403	MTUS1	MTUS1:E052	RBPmap
9	chr8:17721998	aaaauaa	aaaaaaa	3.779	7.87e-05	NUPL2	4.10403	MTUS1	MTUS1:E052	RBPmap
10	chr8:17721999	aaaauaa	aaaaaaa	3.779	7.87e-05	NUPL2	4.10403	MTUS1	MTUS1:E052	RBPmap
11	chr8:17722000	aaaauaa	aaaaaaa	3.779	7.87e-05	NUPL2	4.10403	MTUS1	MTUS1:E052	RBPmap
12	chr8:17722001	aaaauaa	aaaaaaa	3.779	7.87e-05	NUPL2	4.10403	MTUS1	MTUS1:E052	RBPmap
13	chr8:17722002	aaaauaa	aaaaaaa	3.779	7.87e-05	NUPL2	4.10403	MTUS1	MTUS1:E052	RBPmap
209	chr6:41941728	gckgghm	gcggguc	3.778	7.9e-05	SAMD4A	4.10237	CCND3	CCND3:E027	RBPmap
355	chr8:140658254	araaga	agaaga	3.778	7.9e-05	ABPN1	4.10237	PTK2	PTK2:E001	RBPmap
138	chr17:76072482	gcgcagc	cagcagc	3.778	7.9e-05	MBNL1	4.10237	SRP68	SRP68:E040	RBPmap
81	chr14:21211387	ccuuucc	ccuuucc	3.776	7.97e-05	PCBP1	4.09854	HNRNPC	HNRNPC:E018	CisRBP
41	chr8:17645702	chuuuuu	uuuuuuu	3.776	7.97e-05	CPEB2	4.09854	MTUS1	MTUS1:E004	RBPmap
53	chr8:17645714	chuuuuu	uuuuuuu	3.776	7.97e-05	CPEB2	4.09854	MTUS1	MTUS1:E004	RBPmap
5	chr16:1414060	amahwca	aaacaca	3.776	7.97e-05	IGF2BP3	4.09854	UNKL	UNKL:E045	RBPmap
175	chr14:21210787	acacaaa	acacaca	3.775	8e-05	ENSG00000215042	4.09691	HNRNPC	HNRNPC:E007	CisRBP
45	chr3:48693829	acacaaa	acacaag	3.775	8e-05	ENSG00000215042	4.09691	IP6K2	IP6K2:E020	CisRBP
39	chr3:48694863	acacaaa	acucaaa	3.775	8e-05	ENSG00000215042	4.09691	IP6K2	IP6K2:E034	CisRBP
90	chr8:17723923	aacauca	aacaaca	3.775	8e-05	YB-1	4.09691	MTUS1	MTUS1:E058	CisRBP
107	chr14:21262875	araaaam	acaaaaa	3.775	8e-05	ABPC1	4.09691	HNRNPC	HNRNPC:E055	RBPmap
63	chr8:17653487	cuuucu	cuuucu	3.775	8e-05	TBP3	4.09691	MTUS1	MTUS1:E015	RBPmap
40	chr8:17722029	acacrav	acacaaa	3.775	8e-05	HNRNPL	4.09691	MTUS1	MTUS1:E052	RBPmap
81	chr16:1367793	gggggggg	gggagggg	3.775	8e-05	EWSR1	4.09691	UNKL	UNKL:E014	RBPmap
201	chr8:140659273	gaaaacc	caaaaca	3.773	8.06e-05	PABPC3	4.09366	PTK2	PTK2:E008	CisRBP
173	chr14:21210785	amayama	uaacaca	3.773	8.06e-05	HNRNPL	4.09366	HNRNPC	HNRNPC:E007	RBPmap
272	chr8:140662919	auaaaav	auaaaaa	3.773	8.06e-05	KHDRBS1	4.09366	PTK2	PTK2:E013	RBPmap
2	chr7:105116378	raaaacm	gaaaaaa	3.773	8.06e-05	ABPC3	4.09366	SRPK2	SRPK2:E005	RBPmap
14	chr16:1414711	gcgcgcg	gcgcgca	3.772	8.1e-05	PPRC1	4.09151	UNKL	UNKL:E049	CisRBP
1264	chr8:140669688	agagaaa	agagagc	3.771	8.13e-05	Fusip1	4.08991	PTK2	PTK2:E019	CisRBP
165	chr3:48693685	caacaca	aaacaaa	3.771	8.13e-05	IGF2BP2	4.08991	IP6K2	IP6K2:E019	RBPmap
170	chr3:48693690	caacaca	aaacaaa	3.771	8.13e-05	IGF2BP2	4.08991	IP6K2	IP6K2:E019	RBPmap
1264	chr8:140669688	agagavm	agagagc	3.771	8.13e-05	SRSF10	4.08991	PTK2	PTK2:E019	RBPmap
126	chr11:14358382	rygcgcb	gcgcggg	3.77	8.16e-05	RBM8A	4.08831	RRAS2	RRAS2:E022	RBPmap
2	chr16:1414722	rygcgcb	ccgcgcc	3.77	8.16e-05	RBM8A	4.08831	UNKL	UNKL:E050	RBPmap
71	chr6:41941590	gcgcgss	ccgcggg	3.769	8.2e-05	RBM4	4.08619	CCND3	CCND3:E027	RBPmap
11	chr8:140770726	akgavmr	aggauca	3.769	8.2e-05	SRSF9	4.08619	PTK2	PTK2:E083	RBPmap
237	chr14:21263229	uuaaca	guaaua	3.768	8.23e-05	SF1	4.0846	HNRNPC	HNRNPC:E056	RBPmap
154	chr1:52992951	uguau	uguau	3.768	8.23e-05	UM1	4.0846	RRAS2	RRAS2:E005	RBPmap
7	chr14:21263343	vmahwca	aaaaaca	3.767	8.26e-05	IGF2BP2	4.08302	HNRNPC	HNRNPC:E058	RBPmap
1625	chr8:17645428	kauauas	gauauau	3.767	8.26e-05	RBMS1	4.08302	MTUS1	MTUS1:E003	RBPmap
309	chr8:140658938	kauauas	uauauuc	3.767	8.26e-05	RBMS1	4.08302	PTK2	PTK2:E006	RBPmap
137	chr1:52991960	vmahwca	aaaauca	3.767	8.26e-05	IGF2BP2	4.08302	RRAS2	RRAS2:E003	RBPmap
32	chr16:1394162	gcgcgu	gcgcgg	3.767	8.26e-05	RBM4	4.08302	UNKL	UNKL:E029	RBPmap
42	chr8:140830517	aacauca	aacaucu	3.766	8.29e-05	CSDA	4.08145	PTK2	PTK2:E098	CisRBP
42	chr8:140830517	aacaucd	aacaucu	3.766	8.29e-05	YBX1	4.08145	PTK2	PTK2:E098	RBPmap
3	chr7:105116379	aaaauaa	aaaaaaa	3.766	8.29e-05	NUPL2	4.08145	SRPK2	SRPK2:E005	RBPmap
4	chr7:105116380	aaaauaa	aaaaaaa	3.766	8.29e-05	NUPL2	4.08145	SRPK2	SRPK2:E005	RBPmap
5	chr7:105116381	aaaauaa	aaaaaaa	3.766	8.29e-05	NUPL2	4.08145	SRPK2	SRPK2:E005	RBPmap
6	chr7:105116382	aaaauaa	aaaaaaa	3.766	8.29e-05	NUPL2	4.08145	SRPK2	SRPK2:E005	RBPmap
7	chr7:105116383	aaaauaa	aaaaaaa	3.766	8.29e-05	NUPL2	4.08145	SRPK2	SRPK2:E005	RBPmap
14	chr14:21263324	caaaaag	caaaaaa	3.765	8.33e-05	SYNCRIP	4.07935	HNRNPC	HNRNPC:E057	CisRBP
40	chr8:17645701	uuuuuu	cuuuuu	3.765	8.33e-05	CPEB4	4.07935	MTUS1	MTUS1:E004	RBPmap
52	chr8:17645713	uuuuuu	cuuuuu	3.765	8.33e-05	CPEB4	4.07935	MTUS1	MTUS1:E004	RBPmap
42	chr8:17645703	uuuuubk	uuuuuua	3.765	8.33e-05	TIA1	4.07935	MTUS1	MTUS1:E004	RBPmap
14	chr8:17676001	wuacwuk	uuacaua	3.765	8.33e-05	RBM41	4.07935	MTUS1	MTUS1:E031	RBPmap
12	chr16:1403219	cagugc	cagugc	3.764	8.36e-05	ACO1	4.07779	UNKL	UNKL:E040	CisRBP
6	chr14:21263342	aaaaaar	aaaaaac	3.764	8.36e-05	ABPC4	4.07779	HNRNPC	HNRNPC:E058	RBPmap
7	chr14:21263343	aaaaaar	aaaaaca	3.764	8.36e-05	ABPC4	4.07779	HNRNPC	HNRNPC:E058	RBPmap
13	chr14:21263349	aaaaaar	aaaaaua	3.764	8.36e-05	ABPC4	4.07779	HNRNPC	HNRNPC:E058	RBPmap
601	chr14:21264430	aaaaaar	aaaaaaa	3.764	8.36e-05	ABPC4	4.07779	HNRNPC	HNRNPC:E061	RBPmap
77	chr11:14364467	ugcaugc	agaauga	3.763	8.39e-05	A2BP1	4.07624	RRAS2	RRAS2:E026	CisRBP
187	chr3:48695355	ugugukk	ugucugu	3.763	8.39e-05	BRUNOL5	4.07624	IP6K2	IP6K2:E039	RBPmap
365	chr8:140658264	auaaaav	auaaaaa	3.763	8.39e-05	KHDRBS1	4.07624	PTK2	PTK2:E001	RBPmap
77	chr11:14364467	wgcaugm	agaauga	3.763	8.39e-05	RBFOX1	4.07624	RRAS2	RRAS2:E026	RBPmap
80	chr3:48693259	uuuuuyc	uuuuuuc	3.762	8.43e-05	U2AF2	4.07417	IP6K2	IP6K2:E012	RBPmap
1267	chr8:17645070	gguugguu	guuuguuu	3.762	8.43e-05	HNRNP	4.07417	MTUS1	MTUS1:E003	RBPmap
77	chr14:21211383	cuuucccu	cuuuccuu	3.761	8.46e-05	PCBP3	4.07263	HNRNPC	HNRNPC:E018	CisRBP
40	chr8:17722029	acacaaa	acacaaa	3.761	8.46e-05	ENSG00000215042	4.07263	MTUS1	MTUS1:E052	CisRBP
77	chr11:14364467	agcaugc	agaauga	3.761	8.46e-05	EIF2S1	4.07263	RRAS2	RRAS2:E026	CisRBP
2	chr7:105116378	gaaaacc	gaaaaaa	3.761	8.46e-05	PABPC3	4.07263	SRPK2	SRPK2:E005	CisRBP
7	chr14:21263343	amahwca	aaaaaca	3.761	8.46e-05	IGF2BP3	4.07263	HNRNPC	HNRNPC:E058	RBPmap
300	chr14:21264129	raaaacm	aaaaacc	3.761	8.46e-05	ABPC3	4.07263	HNRNPC	HNRNPC:E061	RBPmap
18	chr3:48693473	uaauu	uaauu	3.761	8.46e-05	ELAVL4	4.07263	IP6K2	IP6K2:E017	RBPmap
100	chr3:48694444	uuaau	uuaau	3.761	8.46e-05	FUBP3	4.07263	IP6K2	IP6K2:E027	RBPmap
28	chr8:140658657	auauau	uuauaa	3.761	8.46e-05	RBMS3	4.07263	PTK2	PTK2:E006	RBPmap
53	chr11:14364443	uuaau	uuaau	3.761	8.46e-05	FUBP3	4.07263	RRAS2	RRAS2:E026	RBPmap
225	chr17:76041203	uuaau	uuaau	3.761	8.46e-05	FUBP3	4.07263	SRP68	SRP68:E009	RBPmap
118	chr3:48694989	aggga	aggga	3.76	8.5e-05	NONO	4.07058	IP6K2	IP6K2:E035	CisRBP
179	chr14:21210791	amayama	acauacu	3.76	8.5e-05	HNRNPL	4.07058	HNRNPC	HNRNPC:E007	RBPmap
27	chr8:140770826	agagaaa	agaaaaa	3.759	8.53e-05	Fusip1	4.06905	PTK2	PTK2:E084	CisRBP
92	chr14:21262860	aauaaa	auuaaa	3.759	8.53e-05	KHDRBS2	4.06905	HNRNPC	HNRNPC:E055	RBPmap
27	chr8:140770826	agagavm	agaaaaa	3.759	8.53e-05	SRSF10	4.06905	PTK2	PTK2:E084	RBPmap
1090	chr8:17644893	uaguwrg	uaggagg	3.758	8.56e-05	MSI1	4.06753	MTUS1	MTUS1:E003	RBPmap
1097	chr8:17644900	uaguwrg	uagaagg	3.758	8.56e-05	MSI1	4.06753	MTUS1	MTUS1:E003	RBPmap
11	chr8:17723844	agaaaaa	aaaaaaa	3.757	8.6e-05	PABPC1	4.0655	MTUS1	MTUS1:E058	CisRBP
12	chr8:17723845	agaaaaa	aaaaaaa	3.757	8.6e-05	PABPC1	4.0655	MTUS1	MTUS1:E058	CisRBP
371	chr8:140658270	aaaaaaa	aaaaaga	3.757	8.6e-05	PABPC4	4.0655	PTK2	PTK2:E001	CisRBP
22	chr8:140744789	aaaaaaa	gaaaaaa	3.757	8.6e-05	PABPC4	4.0655	PTK2	PTK2:E062	CisRBP
54	chr7:105306489	aaaaaaa	aaaaaac	3.757	8.6e-05	PABPC4	4.0655	SRPK2	SRPK2:E046	CisRBP
1100	chr14:21210235	caacaca	caaaaca	3.757	8.6e-05	IGF2BP2	4.0655	HNRNPC	HNRNPC:E001	RBPmap
20	chr14:21211829	uuuycc	cuuuuc	3.757	8.6e-05	CBP3	4.0655	HNRNPC	HNRNPC:E024	RBPmap
182	chr3:48693702	caacaca	cagcaca	3.757	8.6e-05	IGF2BP2	4.0655	IP6K2	IP6K2:E019	RBPmap
221	chr7:105143304	uuuuuu	cuuuuu	3.757	8.6e-05	CPEB4	4.0655	SRPK2	SRPK2:E025	RBPmap
32	chr7:105388822	gcgcgg	gcgggg	3.756	8.63e-05	RBM4B	4.06399	SRPK2	SRPK2:E048	RBPmap
58	chr7:105388848	gcgcgg	acgcgg	3.756	8.63e-05	RBM4B	4.06399	SRPK2	SRPK2:E048	RBPmap
14	chr8:17723847	aaaaaar	aaaaaca	3.755	8.67e-05	ABPC4	4.06198	MTUS1	MTUS1:E058	RBPmap
80	chr3:48693033	bguusku	uguuugu	3.754	8.7e-05	ZNF638	4.06048	IP6K2	IP6K2:E005	RBPmap
198	chr3:48695366	bguusku	uguccgu	3.754	8.7e-05	ZNF638	4.06048	IP6K2	IP6K2:E039	RBPmap
1711	chr8:17645514	ccccacccc	cccccaccc	3.754	8.7e-05	CBP2	4.06048	MTUS1	MTUS1:E003	RBPmap
7	chr8:140718362	gcagc	gcagc	3.754	8.7e-05	SRSF5	4.06048	PTK2	PTK2:E047	RBPmap
16	chr8:140718371	gcagc	gcagc	3.754	8.7e-05	SRSF5	4.06048	PTK2	PTK2:E047	RBPmap
96	chr6:41941615	gcgcgu	gcgugc	3.753	8.74e-05	RBM4	4.05849	CCND3	CCND3:E027	RBPmap
64	chr14:21209199	kauauas	aauaugc	3.753	8.74e-05	RBMS1	4.05849	HNRNPC	HNRNPC:E001	RBPmap
16	chr8:17646997	gcuugc	ugcuug	3.753	8.74e-05	MBNL1	4.05849	MTUS1	MTUS1:E008	RBPmap
367	chr8:140658266	aaaauaa	aaaaaaa	3.753	8.74e-05	NUPL2	4.05849	PTK2	PTK2:E001	RBPmap
368	chr8:140658267	aaaauaa	aaaaaaa	3.753	8.74e-05	NUPL2	4.05849	PTK2	PTK2:E001	RBPmap
369	chr8:140658268	aaaauaa	aaaaaaa	3.753	8.74e-05	NUPL2	4.05849	PTK2	PTK2:E001	RBPmap
10	chr11:14337010	vmahwca	aaaaaca	3.753	8.74e-05	IGF2BP2	4.05849	RRAS2	RRAS2:E017	RBPmap
770	chr7:105117146	kauauas	cauauag	3.753	8.74e-05	RBMS1	4.05849	SRPK2	SRPK2:E005	RBPmap
300	chr14:21264129	gaaaacc	aaaaacc	3.75	8.84e-05	PABPC3	4.05355	HNRNPC	HNRNPC:E061	CisRBP
183	chr8:17755803	aucaacg	gucaucc	3.75	8.84e-05	SRSF3	4.05355	MTUS1	MTUS1:E065	CisRBP
218	chr8:140659290	ccaaauu	ccaaauc	3.75	8.84e-05	HNRNPR	4.05355	PTK2	PTK2:E008	CisRBP
166	chr14:21263502	rausawd	aaucaau	3.75	8.84e-05	RBM46	4.05355	HNRNPC	HNRNPC:E058	RBPmap
15	chr3:48689552	cacgc	cacgc	3.75	8.84e-05	HNRNPK	4.05355	IP6K2	IP6K2:E002	RBPmap
50	chr3:48694290	auccccc	aucccca	3.75	8.84e-05	CBP4	4.05355	IP6K2	IP6K2:E026	RBPmap
11	chr3:48694781	auccccc	guccccc	3.75	8.84e-05	CBP4	4.05355	IP6K2	IP6K2:E033	RBPmap
257	chr8:140658886	caaagg	aaaagg	3.75	8.84e-05	NUPL2	4.05355	PTK2	PTK2:E006	RBPmap
1285	chr8:140669709	hrkacag	aagacac	3.75	8.84e-05	ENOX1	4.05355	PTK2	PTK2:E019	RBPmap
30	chr8:140669765	caaagg	uaaagg	3.75	8.84e-05	NUPL2	4.05355	PTK2	PTK2:E021	RBPmap
6	chr8:140846265	uacuu	uacuu	3.75	8.84e-05	RBM41	4.05355	PTK2	PTK2:E099	RBPmap
107	chr14:21262875	agaaaaa	acaaaaa	3.748	8.91e-05	PABPC1	4.05012	HNRNPC	HNRNPC:E055	CisRBP
5	chr3:48694245	aaaaaaa	aaaaaaa	3.748	8.91e-05	PABPC4	4.05012	IP6K2	IP6K2:E026	CisRBP
6	chr8:17721995	aaaaaaa	gaaaaaa	3.748	8.91e-05	PABPC4	4.05012	MTUS1	MTUS1:E052	CisRBP
14	chr8:17722003	aaaaaaa	aaaaaau	3.748	8.91e-05	PABPC4	4.05012	MTUS1	MTUS1:E052	CisRBP
274	chr8:140662921	aaaaaaa	aaaaaaa	3.748	8.91e-05	PABPC4	4.05012	PTK2	PTK2:E013	CisRBP
72	chr6:41941023	gcgcgcg	gcgcgcc	3.747	8.95e-05	PPRC1	4.04818	CCND3	CCND3:E024	CisRBP
198	chr6:41941717	gcgcgss	gagcgcg	3.747	8.95e-05	RBM4	4.04818	CCND3	CCND3:E027	RBPmap
116	chr3:48694987	duagggw	ggaggga	3.747	8.95e-05	HNRNPA2B1	4.04818	IP6K2	IP6K2:E035	RBPmap
156	chr8:140735442	amayama	ccacaua	3.747	8.95e-05	HNRNPL	4.04818	PTK2	PTK2:E051	RBPmap
20	chr3:48689557	acacrav	acaccaa	3.746	8.98e-05	HNRNPL	4.04672	IP6K2	IP6K2:E002	RBPmap
179	chr3:48693699	acacrav	acacagc	3.746	8.98e-05	HNRNPL	4.04672	IP6K2	IP6K2:E019	RBPmap
12	chr3:48694836	acacrav	acacaac	3.746	8.98e-05	HNRNPL	4.04672	IP6K2	IP6K2:E034	RBPmap
107	chr14:21262875	aaaaaar	acaaaaa	3.745	9.02e-05	ABPC4	4.04479	HNRNPC	HNRNPC:E055	RBPmap
117	chr14:21262885	aaaaaar	aaaaaau	3.745	9.02e-05	ABPC4	4.04479	HNRNPC	HNRNPC:E055	RBPmap
17	chr14:21263353	araaaam	auaaaaa	3.745	9.02e-05	ABPC1	4.04479	HNRNPC	HNRNPC:E058	RBPmap
17	chr14:21263353	araaaam	auaaaaa	3.745	9.02e-05	SART3	4.04479	HNRNPC	HNRNPC:E058	RBPmap
13	chr8:17723846	aaaaaar	aaaaaac	3.745	9.02e-05	ABPC4	4.04479	MTUS1	MTUS1:E058	RBPmap
49	chr7:105306484	aaaaaar	caaaaaa	3.745	9.02e-05	ABPC4	4.04479	SRPK2	SRPK2:E046	RBPmap
162	chr8:141001099	gcgcgcg	ccccgcg	3.744	9.06e-05	PPRC1	4.04287	PTK2	PTK2:E139	CisRBP
68	chr6:41941019	ssgcgcs	gggcgcg	3.744	9.06e-05	RC1	4.04287	CCND3	CCND3:E024	RBPmap
218	chr6:41941737	gcgcgg	gcgcug	3.744	9.06e-05	RBM4B	4.04287	CCND3	CCND3:E027	RBPmap
224	chr6:41941743	gcgcgg	gcgcug	3.744	9.06e-05	RBM4B	4.04287	CCND3	CCND3:E027	RBPmap
227	chr14:21263219	uuaaca	auaaua	3.744	9.06e-05	SF1	4.04287	HNRNPC	HNRNPC:E056	RBPmap
230	chr14:21263222	uuaaca	auaaua	3.744	9.06e-05	SF1	4.04287	HNRNPC	HNRNPC:E056	RBPmap
93	chr8:140764514	acacag	aaacag	3.744	9.06e-05	CNOT4	4.04287	PTK2	PTK2:E080	RBPmap
162	chr8:141001099	ssgcgcs	ccccgcg	3.744	9.06e-05	RC1	4.04287	PTK2	PTK2:E139	RBPmap
17	chr8:141001330	gcgcgg	gcgcgu	3.744	9.06e-05	RBM4B	4.04287	PTK2	PTK2:E151	RBPmap
84	chr7:105146576	acacag	acacac	3.744	9.06e-05	CNOT4	4.04287	SRPK2	SRPK2:E028	RBPmap
86	chr7:105146578	acacag	acacau	3.744	9.06e-05	CNOT4	4.04287	SRPK2	SRPK2:E028	RBPmap
14	chr16:1414734	ssgcgcs	ccccgcc	3.744	9.06e-05	RC1	4.04287	UNKL	UNKL:E050	RBPmap
194	chr3:48695362	kgugukk	uguuugu	3.743	9.09e-05	BRUNOL4	4.04144	IP6K2	IP6K2:E039	RBPmap
92	chr8:17723925	caacaca	caacaaa	3.743	9.09e-05	IGF2BP2	4.04144	MTUS1	MTUS1:E058	RBPmap
1276	chr8:140669700	caacaca	agacaca	3.743	9.09e-05	IGF2BP2	4.04144	PTK2	PTK2:E019	RBPmap
1278	chr8:140669702	caacaca	acacaca	3.743	9.09e-05	IGF2BP2	4.04144	PTK2	PTK2:E019	RBPmap
160	chr8:140735446	caacaca	auacaca	3.743	9.09e-05	IGF2BP2	4.04144	PTK2	PTK2:E051	RBPmap
157	chr8:141001094	rygcgcb	ccgcgcc	3.743	9.09e-05	RBM8A	4.04144	PTK2	PTK2:E139	RBPmap
89	chr7:105142425	maucuur	caucuuc	3.743	9.09e-05	MATR3	4.04144	SRPK2	SRPK2:E024	RBPmap
95	chr7:105142431	maucuur	caucuuu	3.743	9.09e-05	MATR3	4.04144	SRPK2	SRPK2:E024	RBPmap
92	chr14:21262860	auaaaav	auuaaaa	3.742	9.13e-05	KHDRBS1	4.03953	HNRNPC	HNRNPC:E055	RBPmap
81	chr8:17684434	uuuduuu	uuuguuu	3.742	9.13e-05	ZC3H14	4.03953	MTUS1	MTUS1:E039	RBPmap
16	chr14:21263352	rauaaam	aauaaaa	3.741	9.16e-05	KHDRBS2	4.0381	HNRNPC	HNRNPC:E058	RBPmap
50	chr8:17755061	aacauca	cacauca	3.74	9.2e-05	CSDA	4.03621	MTUS1	MTUS1:E063	CisRBP
312	chr6:41935296	auuaau	auuaau	3.74	9.2e-05	ZCRB1	4.03621	CCND3	CCND3:E004	RBPmap
72	chr14:21263654	aaaauaa	aaaaaaa	3.74	9.2e-05	NUPL2	4.03621	HNRNPC	HNRNPC:E059	RBPmap
73	chr14:21263655	aaaauaa	aaaaaaa	3.74	9.2e-05	NUPL2	4.03621	HNRNPC	HNRNPC:E059	RBPmap
74	chr14:21263656	aaaauaa	aaaaaaa	3.74	9.2e-05	NUPL2	4.03621	HNRNPC	HNRNPC:E059	RBPmap
75	chr14:21263657	aaaauaa	aaaaaaa	3.74	9.2e-05	NUPL2	4.03621	HNRNPC	HNRNPC:E059	RBPmap
31	chr3:48694855	vmahwca	aaaauca	3.74	9.2e-05	IGF2BP2	4.03621	IP6K2	IP6K2:E034	RBPmap
372	chr8:140658271	aaaauaa	aaaagaa	3.74	9.2e-05	NUPL2	4.03621	PTK2	PTK2:E001	RBPmap
6	chr14:21263342	aaaaaaa	aaaaaac	3.739	9.24e-05	PABPC4	4.03433	HNRNPC	HNRNPC:E058	CisRBP
7	chr14:21263343	aaaaaaa	aaaaaca	3.739	9.24e-05	PABPC4	4.03433	HNRNPC	HNRNPC:E058	CisRBP
13	chr14:21263349	aaaaaaa	aaaaaua	3.739	9.24e-05	PABPC4	4.03433	HNRNPC	HNRNPC:E058	CisRBP
7	chr14:21263589	agaaaau	aaaaaau	3.739	9.24e-05	PABPC5	4.03433	HNRNPC	HNRNPC:E059	CisRBP
601	chr14:21264430	aaaaaaa	aaaaaaa	3.739	9.24e-05	PABPC4	4.03433	HNRNPC	HNRNPC:E061	CisRBP
21	chr8:140744788	aaaaaaa	agaaaaa	3.739	9.24e-05	PABPC4	4.03433	PTK2	PTK2:E062	CisRBP
7	chr14:21263589	agaaadu	aaaaaau	3.739	9.24e-05	ABPC5	4.03433	HNRNPC	HNRNPC:E059	RBPmap
47	chr8:140669782	caaagg	gaaagg	3.739	9.24e-05	NUPL2	4.03433	PTK2	PTK2:E021	RBPmap
150	chr17:76041128	raaaacm	caaaaca	3.739	9.24e-05	ABPC3	4.03433	SRP68	SRP68:E009	RBPmap
206	chr7:105143289	uuuuuu	cuuuuu	3.739	9.24e-05	CPEB4	4.03433	SRPK2	SRPK2:E025	RBPmap
5	chr8:140818988	bguusku	uguuugu	3.738	9.27e-05	ZNF638	4.03292	PTK2	PTK2:E096	RBPmap
14	chr16:1414734	ccccacccc	ccccgcccc	3.738	9.27e-05	CBP2	4.03292	UNKL	UNKL:E050	RBPmap
13	chr3:48689622	aacauca	agcauca	3.737	9.31e-05	YB-1	4.03105	IP6K2	IP6K2:E003	CisRBP
16	chr3:48689625	aacauca	aucauca	3.737	9.31e-05	YB-1	4.03105	IP6K2	IP6K2:E003	CisRBP
33	chr8:140746893	uuuguuu	uuuuuuu	3.737	9.31e-05	BOLL	4.03105	PTK2	PTK2:E066	RBPmap
34	chr8:140746894	uuuguuu	uuuuuuu	3.737	9.31e-05	BOLL	4.03105	PTK2	PTK2:E066	RBPmap
35	chr8:140746895	uuuguuu	uuuuuuu	3.737	9.31e-05	BOLL	4.03105	PTK2	PTK2:E066	RBPmap
267	chr6:42049917	uaaua	uaaua	3.736	9.35e-05	ZFP36	4.02919	CCND3	CCND3:E043	RBPmap
270	chr6:42049920	uaaua	uaaua	3.736	9.35e-05	ZFP36	4.02919	CCND3	CCND3:E043	RBPmap
122	chr14:21262890	aauaaa	auuaaa	3.736	9.35e-05	KHDRBS2	4.02919	HNRNPC	HNRNPC:E055	RBPmap
27	chr8:141000964	gcgcgss	gcgcggg	3.736	9.35e-05	RBM4	4.02919	PTK2	PTK2:E139	RBPmap
113	chr17:76072457	gcgcagc	ccgccgc	3.736	9.35e-05	MBNL1	4.02919	SRP68	SRP68:E040	RBPmap
225	chr7:105143308	uukruuu	uuguuuu	3.736	9.35e-05	HuR	4.02919	SRPK2	SRPK2:E025	RBPmap
37	chr7:105388827	gcgcgss	gcggggg	3.736	9.35e-05	RBM4	4.02919	SRPK2	SRPK2:E048	RBPmap
10	chr3:48689547	acgca	acaca	3.735	9.39e-05	RBM45	4.02733	IP6K2	IP6K2:E002	RBPmap
12	chr3:48689549	acgca	acaca	3.735	9.39e-05	RBM45	4.02733	IP6K2	IP6K2:E002	RBPmap
158	chr8:141001095	cgcgc	cgcgc	3.735	9.39e-05	FUS	4.02733	PTK2	PTK2:E139	RBPmap
165	chr8:141001102	cgcgc	cgcgc	3.735	9.39e-05	FUS	4.02733	PTK2	PTK2:E139	RBPmap
172	chr8:141001109	cgcgc	ggcgc	3.735	9.39e-05	FUS	4.02733	PTK2	PTK2:E139	RBPmap
77	chr17:76061568	uguaag	uguaag	3.735	9.39e-05	SFPQ	4.02733	SRP68	SRP68:E029	RBPmap
418	chr8:17644221	acacaca	acauaca	3.734	9.42e-05	hnRNPLL	4.02595	MTUS1	MTUS1:E003	CisRBP
92	chr14:21262860	aauaaa	auuaaa	3.733	9.46e-05	KHDRBS3	4.02411	HNRNPC	HNRNPC:E055	RBPmap
92	chr3:48694963	gggaggg	gagaggg	3.733	9.46e-05	HNRNPH2	4.02411	IP6K2	IP6K2:E035	RBPmap
119	chr3:48694990	gggaggg	gggagug	3.733	9.46e-05	HNRNPH2	4.02411	IP6K2	IP6K2:E035	RBPmap
17	chr8:141001141	cgccg	cgccg	3.733	9.46e-05	EIF4G2	4.02411	PTK2	PTK2:E140	RBPmap
39	chr11:14358801	cgccg	cgccc	3.733	9.46e-05	EIF4G2	4.02411	RRAS2	RRAS2:E023	RBPmap
42	chr11:14358804	cgccg	ccccg	3.733	9.46e-05	EIF4G2	4.02411	RRAS2	RRAS2:E023	RBPmap
60	chr17:76072404	cgccg	caccg	3.733	9.46e-05	EIF4G2	4.02411	SRP68	SRP68:E040	RBPmap
65	chr7:105388855	cgccg	cgccg	3.733	9.46e-05	EIF4G2	4.02411	SRPK2	SRPK2:E048	RBPmap
51	chr16:1397228	cgccg	cgccg	3.733	9.46e-05	EIF4G2	4.02411	UNKL	UNKL:E031	RBPmap
20	chr16:1414740	cgccg	ccccg	3.733	9.46e-05	EIF4G2	4.02411	UNKL	UNKL:E050	RBPmap
20	chr3:48689557	acacaaa	acaccaa	3.732	9.5e-05	ENSG00000215042	4.02228	IP6K2	IP6K2:E002	CisRBP
179	chr3:48693699	acacaaa	acacagc	3.732	9.5e-05	ENSG00000215042	4.02228	IP6K2	IP6K2:E019	CisRBP
12	chr3:48694836	acacaaa	acacaac	3.732	9.5e-05	ENSG00000215042	4.02228	IP6K2	IP6K2:E034	CisRBP
7	chr3:48694878	acacrav	acaaaac	3.732	9.5e-05	HNRNPL	4.02228	IP6K2	IP6K2:E035	RBPmap
38	chr16:1367129	agcagc	ugcagc	3.732	9.5e-05	SRSF8	4.02228	UNKL	UNKL:E010	RBPmap
47	chr16:1367138	agcagc	ugcagc	3.732	9.5e-05	SRSF8	4.02228	UNKL	UNKL:E010	RBPmap
31	chr3:48694855	amahwca	aaaauca	3.731	9.54e-05	IGF2BP3	4.02045	IP6K2	IP6K2:E034	RBPmap
196	chr8:140659268	amahwca	aaaaaca	3.731	9.54e-05	IGF2BP3	4.02045	PTK2	PTK2:E008	RBPmap
1274	chr8:140669698	acacag	acagac	3.731	9.54e-05	CNOT4	4.02045	PTK2	PTK2:E019	RBPmap
79	chr16:1367791	ggggg	ggggg	3.731	9.54e-05	RBM24	4.02045	UNKL	UNKL:E014	RBPmap
2	chr7:105116378	aaaaaaa	gaaaaaa	3.73	9.57e-05	PABPC4	4.01909	SRPK2	SRPK2:E005	CisRBP
3	chr17:78206913	maucuur	uaucuug	3.73	9.57e-05	MATR3	4.01909	AFMID	AFMID:E028	RBPmap
137	chr3:48740342	gguugguu	guuugcuu	3.73	9.57e-05	HNRNP	4.01909	IP6K2	IP6K2:E072	RBPmap
164	chr8:141001101	rygcgcb	ccgcgcc	3.73	9.57e-05	RBM8A	4.01909	PTK2	PTK2:E139	RBPmap
246	chr8:140675745	caacaca	aaacaca	3.729	9.61e-05	IGF2BP2	4.01728	PTK2	PTK2:E025	RBPmap
158	chr1:52992955	hauaua	uauaga	3.729	9.61e-05	RBMS3	4.01728	RRAS2	RRAS2:E005	RBPmap
63	chr8:17653487	cuuucu	cuuucu	3.728	9.65e-05	TB3	4.01547	MTUS1	MTUS1:E015	RBPmap
104	chr7:105206504	gacaga	gacaga	3.728	9.65e-05	CNOT4	4.01547	SRPK2	SRPK2:E041	RBPmap
1216	chr8:17645019	gaaaacc	aaaaacc	3.727	9.69e-05	PABPC3	4.01368	MTUS1	MTUS1:E003	CisRBP
150	chr17:76041128	gaaaacc	caaaaca	3.727	9.69e-05	PABPC3	4.01368	SRP68	SRP68:E009	CisRBP
259	chr6:41941420	gggagggg	cggugggg	3.727	9.69e-05	HNRNPF	4.01368	CCND3	CCND3:E025	RBPmap
81	chr14:21211387	ccwwhcc	ccuuucc	3.727	9.69e-05	CBP1	4.01368	HNRNPC	HNRNPC:E018	RBPmap
7	chr14:21263343	raaaacm	aaaaaca	3.727	9.69e-05	ABPC3	4.01368	HNRNPC	HNRNPC:E058	RBPmap
1216	chr8:17645019	raaaacm	aaaaacc	3.727	9.69e-05	ABPC3	4.01368	MTUS1	MTUS1:E003	RBPmap
50	chr8:17755061	aacaucd	cacauca	3.727	9.69e-05	YBX1	4.01368	MTUS1	MTUS1:E063	RBPmap
240	chr8:140658869	caaagg	aaaagg	3.727	9.69e-05	NUPL2	4.01368	PTK2	PTK2:E006	RBPmap
46	chr8:140954788	aaaaaar	aaaaaaa	3.727	9.69e-05	ABPC4	4.01368	PTK2	PTK2:E132	RBPmap
50	chr7:105306485	aaaauaa	aaaaaaa	3.727	9.69e-05	NUPL2	4.01368	SRPK2	SRPK2:E046	RBPmap
51	chr7:105306486	aaaauaa	aaaaaaa	3.727	9.69e-05	NUPL2	4.01368	SRPK2	SRPK2:E046	RBPmap
52	chr7:105306487	aaaauaa	aaaaaaa	3.727	9.69e-05	NUPL2	4.01368	SRPK2	SRPK2:E046	RBPmap
53	chr7:105306488	aaaauaa	aaaaaaa	3.727	9.69e-05	NUPL2	4.01368	SRPK2	SRPK2:E046	RBPmap
103	chr8:17723936	vmahwca	aaacaca	3.726	9.73e-05	IGF2BP2	4.01189	MTUS1	MTUS1:E058	RBPmap
483	chr7:105116859	kauauas	uauauac	3.726	9.73e-05	RBMS1	4.01189	SRPK2	SRPK2:E005	RBPmap
4	chr16:1414724	gcgcgu	gcgccg	3.726	9.73e-05	RBM4	4.01189	UNKL	UNKL:E050	RBPmap
99	chr14:21262867	araaaam	auaaaaa	3.725	9.77e-05	SART3	4.01011	HNRNPC	HNRNPC:E055	RBPmap
113	chr14:21262881	araaaam	auaaaaa	3.725	9.77e-05	SART3	4.01011	HNRNPC	HNRNPC:E055	RBPmap
27	chr8:17653212	uuuuubk	uuuuuug	3.725	9.77e-05	TIA1	4.01011	MTUS1	MTUS1:E014	RBPmap
250	chr11:14278931	araaaam	aaaaaaa	3.725	9.77e-05	SART3	4.01011	RRAS2	RRAS2:E004	RBPmap
251	chr11:14278932	araaaam	aaaaaaa	3.725	9.77e-05	SART3	4.01011	RRAS2	RRAS2:E004	RBPmap
49	chr17:76067265	ugugukk	ugucugu	3.725	9.77e-05	BRUNOL5	4.01011	SRP68	SRP68:E035	RBPmap
29	chr3:48694853	ccaaauu	ccaaaau	3.724	9.8e-05	HNRNPR	4.00877	IP6K2	IP6K2:E034	CisRBP
39	chr6:41940624	ugggrad	uggggaa	3.724	9.8e-05	ESRP2	4.00877	CCND3	CCND3:E023	RBPmap
155	chr14:21210767	uacaca	cacacu	3.724	9.8e-05	HNRNPL	4.00877	HNRNPC	HNRNPC:E007	RBPmap
142	chr14:21230508	rausawd	aauaaau	3.724	9.8e-05	RBM46	4.00877	HNRNPC	HNRNPC:E036	RBPmap
1	chr3:48694872	uacaca	cacaca	3.724	9.8e-05	HNRNPL	4.00877	IP6K2	IP6K2:E035	RBPmap
2	chr8:17721713	uuuuuyc	uuuuuuc	3.724	9.8e-05	U2AF2	4.00877	MTUS1	MTUS1:E051	RBPmap
68	chr8:140764489	uacaca	uacaca	3.724	9.8e-05	HNRNPL	4.00877	PTK2	PTK2:E080	RBPmap
17	chr16:1414737	cgccg	cgccc	3.724	9.8e-05	EIF4G2	4.00877	UNKL	UNKL:E050	RBPmap
6	chr14:21211312	acacaca	agaaaca	3.722	9.88e-05	hnRNPLL	4.00524	HNRNPC	HNRNPC:E018	CisRBP
135	chr6:41941654	gcgcagc	gggcagc	3.722	9.88e-05	MBNL1	4.00524	CCND3	CCND3:E027	RBPmap
6	chr14:21211312	rcahaca	agaaaca	3.722	9.88e-05	HNRPLL	4.00524	HNRNPC	HNRNPC:E018	RBPmap
122	chr14:21262890	auaaaav	auuaaaa	3.722	9.88e-05	KHDRBS1	4.00524	HNRNPC	HNRNPC:E055	RBPmap
79	chr3:48693258	uuuduuu	uuuuuuu	3.722	9.88e-05	ZC3H14	4.00524	IP6K2	IP6K2:E012	RBPmap
418	chr8:17644221	rcahaca	acauaca	3.722	9.88e-05	HNRPLL	4.00524	MTUS1	MTUS1:E003	RBPmap
98	chr8:140669833	auaaaav	auaaaaa	3.722	9.88e-05	KHDRBS1	4.00524	PTK2	PTK2:E021	RBPmap
116	chr17:76072460	gcgcagc	ccgccgc	3.722	9.88e-05	MBNL1	4.00524	SRP68	SRP68:E040	RBPmap
216	chr7:105116592	uauauag	aauauac	3.722	9.88e-05	DAZAP1	4.00524	SRPK2	SRPK2:E005	RBPmap
107	chr14:21262875	aaaaaaa	acaaaaa	3.721	9.92e-05	PABPC4	4.00349	HNRNPC	HNRNPC:E055	CisRBP
117	chr14:21262885	aaaaaaa	aaaaaau	3.721	9.92e-05	PABPC4	4.00349	HNRNPC	HNRNPC:E055	CisRBP
78	chr8:17676353	ccccacccc	cccccaccc	3.721	9.92e-05	CBP2	4.00349	MTUS1	MTUS1:E034	RBPmap
31	chr14:21209166	uuuaa	uuuaa	3.72	9.96e-05	RBM15B	4.00174	HNRNPC	HNRNPC:E001	RBPmap
69	chr14:21262837	uuuaa	uuuaa	3.72	9.96e-05	RBM15B	4.00174	HNRNPC	HNRNPC:E055	RBPmap
77	chr14:21262845	uuuaa	uuuaa	3.72	9.96e-05	RBM15B	4.00174	HNRNPC	HNRNPC:E055	RBPmap
1286	chr8:140669710	amayama	agacacg	3.72	9.96e-05	HNRNPL	4.00174	PTK2	PTK2:E019	RBPmap
1097	chr14:21210232	acacaaa	gcacaaa	3.718	0.0001	ENSG00000215042	4	HNRNPC	HNRNPC:E001	CisRBP
17	chr14:21263353	agaaaaa	auaaaaa	3.718	0.0001	PABPC1	4	HNRNPC	HNRNPC:E058	CisRBP
7	chr3:48694878	acacaaa	acaaaac	3.718	0.0001	ENSG00000215042	4	IP6K2	IP6K2:E035	CisRBP
136	chr1:52992933	aaaaaaa	aaaaaaa	3.718	0.0001	PABPC4	4	RRAS2	RRAS2:E005	CisRBP
263	chr6:41941424	gggggggg	gggggagg	3.718	0.0001	EWSR1	4	CCND3	CCND3:E025	RBPmap
259	chr6:41941420	gggugggg	cggugggg	3.719	0.0001	ILF2	4	CCND3	CCND3:E025	RBPmap
1097	chr14:21210232	acacrav	gcacaaa	3.718	0.0001	HNRNPL	4	HNRNPC	HNRNPC:E001	RBPmap
299	chr14:21263291	aaaaaar	aaaaaau	3.718	0.0001	ABPC4	4	HNRNPC	HNRNPC:E056	RBPmap
4	chr14:21263340	uaaaa	uaaaa	3.719	0.0001	HNRNPDL	4	HNRNPC	HNRNPC:E058	RBPmap
18	chr14:21263354	uaaaa	uaaaa	3.719	0.0001	HNRNPDL	4	HNRNPC	HNRNPC:E058	RBPmap
9	chr3:48693992	acgacg	aacgac	3.718	0.0001	SRSF7	4	IP6K2	IP6K2:E022	RBPmap
61	chr3:48715478	hrkacag	cagacag	3.719	0.0001	ENOX1	4	IP6K2	IP6K2:E049	RBPmap
1046	chr8:17654544	aaaaaar	aaaaaaa	3.718	0.0001	ABPC4	4	MTUS1	MTUS1:E016	RBPmap
28	chr8:17674864	aaaaaar	gaaaaaa	3.718	0.0001	ABPC4	4	MTUS1	MTUS1:E027	RBPmap
32	chr8:17674868	aaaaaar	aaaaaau	3.718	0.0001	ABPC4	4	MTUS1	MTUS1:E027	RBPmap
136	chr1:52992933	aaaaaar	aaaaaaa	3.718	0.0001	ABPC4	4	RRAS2	RRAS2:E005	RBPmap
34	chr11:14358796	acgacg	cacgcc	3.718	0.0001	SRSF7	4	RRAS2	RRAS2:E023	RBPmap
172	chr7:105116548	uaaaa	uaaaa	3.719	0.0001	HNRNPDL	4	SRPK2	SRPK2:E005	RBPmap
177	chr7:105116553	uaaaa	uaaaa	3.719	0.0001	HNRNPDL	4	SRPK2	SRPK2:E005	RBPmap
224	chr7:105116600	hauaua	ucuaua	3.719	0.0001	RBMS3	4	SRPK2	SRPK2:E005	RBPmap
891	chr16:1364096	acacag	acagag	3.718	0.0001	CNOT4	4	UNKL	UNKL:E002	RBPmap
7	chr14:21263343	gaaaacc	aaaaaca	3.716	0.000101	PABPC3	3.99568	HNRNPC	HNRNPC:E058	CisRBP
99	chr14:21262867	araaaam	auaaaaa	3.716	0.000101	ABPC1	3.99568	HNRNPC	HNRNPC:E055	RBPmap
113	chr14:21262881	araaaam	auaaaaa	3.716	0.000101	ABPC1	3.99568	HNRNPC	HNRNPC:E055	RBPmap
90	chr8:17723923	aacawcd	aacaaca	3.716	0.000101	YBX2	3.99568	MTUS1	MTUS1:E058	RBPmap
61	chr8:140669796	raaaacm	aaaaaca	3.716	0.000101	ABPC3	3.99568	PTK2	PTK2:E021	RBPmap
17	chr8:140700907	uuuycc	uuuucc	3.716	0.000101	CBP3	3.99568	PTK2	PTK2:E030	RBPmap
250	chr11:14278931	araaaam	aaaaaaa	3.716	0.000101	ABPC1	3.99568	RRAS2	RRAS2:E004	RBPmap
251	chr11:14278932	araaaam	aaaaaaa	3.716	0.000101	ABPC1	3.99568	RRAS2	RRAS2:E004	RBPmap
122	chr11:14358378	rygcgcb	cagcgcg	3.716	0.000101	RBM8A	3.99568	RRAS2	RRAS2:E022	RBPmap
31	chr7:105389274	rygcgcb	gcgcccg	3.716	0.000101	RBM8A	3.99568	SRPK2	SRPK2:E051	RBPmap
1237	chr14:21210372	cucaa	cucaa	3.714	0.000102	RBMY1A1	3.9914	HNRNPC	HNRNPC:E001	CisRBP
75	chr3:48693254	uukruuu	uuuguuu	3.714	0.000102	HuR	3.9914	IP6K2	IP6K2:E012	RBPmap
26	chr8:17653211	uuuuuu	cuuuuu	3.713	0.000102	CPEB4	3.9914	MTUS1	MTUS1:E014	RBPmap
274	chr8:17723514	uuuuuub	uuuuuuu	3.714	0.000102	RALY	3.9914	MTUS1	MTUS1:E056	RBPmap
275	chr8:17723515	uuuuuub	uuuuuuu	3.714	0.000102	RALY	3.9914	MTUS1	MTUS1:E056	RBPmap
274	chr8:17723514	uuuuuyc	uuuuuuu	3.714	0.000102	U2AF2	3.9914	MTUS1	MTUS1:E056	RBPmap
275	chr8:17723515	uuuuuyc	uuuuuuu	3.714	0.000102	U2AF2	3.9914	MTUS1	MTUS1:E056	RBPmap
645	chr8:17754361	uukruuu	uugauuu	3.714	0.000102	HuR	3.9914	MTUS1	MTUS1:E062	RBPmap
28	chr8:140658657	auauaa	uuauaa	3.714	0.000102	RBMS2	3.9914	PTK2	PTK2:E006	RBPmap
237	chr7:105143320	uuuuuyc	auuuuuc	3.714	0.000102	U2AF2	3.9914	SRPK2	SRPK2:E025	RBPmap
14	chr16:1414734	cgccg	ccccg	3.714	0.000102	EIF4G2	3.9914	UNKL	UNKL:E050	RBPmap
29	chr6:41941480	ugcaugc	cgcaugu	3.711	0.000103	A2BP1	3.98716	CCND3	CCND3:E026	CisRBP
14	chr8:17723847	aaaaaaa	aaaaaca	3.712	0.000103	PABPC4	3.98716	MTUS1	MTUS1:E058	CisRBP
59	chr8:140669794	agagaaa	agaaaaa	3.711	0.000103	Fusip1	3.98716	PTK2	PTK2:E021	CisRBP
55	chr6:41940464	cagcag	augcag	3.712	0.000103	SRSF10	3.98716	CCND3	CCND3:E021	RBPmap
29	chr6:41941480	wgcaugm	cgcaugu	3.711	0.000103	RBFOX1	3.98716	CCND3	CCND3:E026	RBPmap
201	chr8:140659273	vmahwca	caaaaca	3.712	0.000103	IGF2BP2	3.98716	PTK2	PTK2:E008	RBPmap
211	chr8:140659283	rausawd	aaugaac	3.711	0.000103	RBM46	3.98716	PTK2	PTK2:E008	RBPmap
59	chr8:140669794	agagavm	agaaaaa	3.711	0.000103	SRSF10	3.98716	PTK2	PTK2:E021	RBPmap
572	chr1:52992395	vmahwca	acaaaca	3.712	0.000103	IGF2BP2	3.98716	RRAS2	RRAS2:E003	RBPmap
141	chr7:105146633	uguaag	uguaag	3.711	0.000103	SFPQ	3.98716	SRPK2	SRPK2:E028	RBPmap
67	chr16:1385274	gcgcgu	gcgcag	3.712	0.000103	RBM4	3.98716	UNKL	UNKL:E026	RBPmap
33	chr6:41940442	gcgcagc	gcgcagc	3.708	0.000104	MBNL1	3.98297	CCND3	CCND3:E021	RBPmap
637	chr6:42050287	gragga	ggagga	3.71	0.000104	SRSF1	3.98297	CCND3	CCND3:E043	RBPmap
32	chr8:17653217	bguusku	uguucuu	3.708	0.000104	ZNF638	3.98297	MTUS1	MTUS1:E014	RBPmap
27	chr8:17674863	aaaaaar	agaaaaa	3.709	0.000104	ABPC4	3.98297	MTUS1	MTUS1:E027	RBPmap
36	chr8:140658665	uauauag	uauauaa	3.708	0.000104	DAZAP1	3.98297	PTK2	PTK2:E006	RBPmap
54	chr11:14278735	gguaguag	aguaguaa	3.708	0.000104	HNRNPA2B1	3.98297	RRAS2	RRAS2:E004	RBPmap
203	chr7:105143286	uuuuuuuuu	uuucuuuuu	3.71	0.000104	RBM24	3.98297	SRPK2	SRPK2:E025	RBPmap
218	chr7:105143301	uuuuuuuuu	uuucuuuuu	3.71	0.000104	RBM24	3.98297	SRPK2	SRPK2:E025	RBPmap
224	chr7:105143307	uuuuuuuuu	uuuguuuuu	3.71	0.000104	RBM24	3.98297	SRPK2	SRPK2:E025	RBPmap
165	chr3:48693685	amayama	aaacaaa	3.707	0.000105	HNRNPL	3.97881	IP6K2	IP6K2:E019	RBPmap
170	chr3:48693690	amayama	aaacaaa	3.707	0.000105	HNRNPL	3.97881	IP6K2	IP6K2:E019	RBPmap
10	chr3:48694834	amayama	aaacaca	3.707	0.000105	HNRNPL	3.97881	IP6K2	IP6K2:E034	RBPmap
447	chr8:17644250	grhuuaa	gacuuaa	3.707	0.000105	ZCRB1	3.97881	MTUS1	MTUS1:E003	RBPmap
18	chr8:17723851	araaaam	acaaaaa	3.706	0.000105	SART3	3.97881	MTUS1	MTUS1:E058	RBPmap
194	chr8:140659266	araaaam	aaaaaaa	3.706	0.000105	SART3	3.97881	PTK2	PTK2:E008	RBPmap
99	chr17:76048069	amayama	agacaca	3.707	0.000105	HNRNPL	3.97881	SRP68	SRP68:E017	RBPmap
5	chr14:21263587	agaaaau	agaaaaa	3.705	0.000106	PABPC5	3.97469	HNRNPC	HNRNPC:E059	CisRBP
15	chr8:17654681	gaaaacc	caaaacc	3.705	0.000106	PABPC3	3.97469	MTUS1	MTUS1:E019	CisRBP
205	chr6:41941724	ssgcgcs	gggcgcg	3.705	0.000106	RC1	3.97469	CCND3	CCND3:E027	RBPmap
45	chr6:41941811	ssgcgcs	gcgcccc	3.705	0.000106	RC1	3.97469	CCND3	CCND3:E029	RBPmap
14	chr14:21211320	acacag	acacaa	3.705	0.000106	CNOT4	3.97469	HNRNPC	HNRNPC:E018	RBPmap
29	chr14:21211838	uuuuuyc	uuuuucc	3.705	0.000106	U2AF2	3.97469	HNRNPC	HNRNPC:E024	RBPmap
5	chr14:21263587	agaaadu	agaaaaa	3.705	0.000106	ABPC5	3.97469	HNRNPC	HNRNPC:E059	RBPmap
68	chr8:17646043	acacag	ccacag	3.705	0.000106	CNOT4	3.97469	MTUS1	MTUS1:E007	RBPmap
15	chr8:17654681	raaaacm	caaaacc	3.705	0.000106	ABPC3	3.97469	MTUS1	MTUS1:E019	RBPmap
276	chr8:17723516	uuuuuub	uuuuuuc	3.705	0.000106	RALY	3.97469	MTUS1	MTUS1:E056	RBPmap
20	chr8:140675479	auauau	auauau	3.705	0.000106	RBMS3	3.97469	PTK2	PTK2:E024	RBPmap
15	chr8:141000952	accgg	cccgg	3.704	0.000106	RBM22	3.97469	PTK2	PTK2:E139	RBPmap
148	chr11:14358910	cgccg	cgcug	3.705	0.000106	EIF4G2	3.97469	RRAS2	RRAS2:E023	RBPmap
151	chr11:14358913	cgccg	ugccg	3.705	0.000106	EIF4G2	3.97469	RRAS2	RRAS2:E023	RBPmap
524	chr17:76048494	agggu	agggu	3.704	0.000106	HNRNPF	3.97469	SRP68	SRP68:E017	RBPmap
8	chr7:105116384	raaaacm	aaaaaac	3.705	0.000106	ABPC3	3.97469	SRPK2	SRPK2:E005	RBPmap
2	chr16:1413847	cgccg	cgucg	3.705	0.000106	EIF4G2	3.97469	UNKL	UNKL:E043	RBPmap
8	chr16:1414728	cgccg	cggcg	3.705	0.000106	EIF4G2	3.97469	UNKL	UNKL:E050	RBPmap
11	chr16:1414731	cgccg	cgccc	3.705	0.000106	EIF4G2	3.97469	UNKL	UNKL:E050	RBPmap
13	chr8:17723846	aaaaaaa	aaaaaac	3.703	0.000107	PABPC4	3.97062	MTUS1	MTUS1:E058	CisRBP
1385	chr14:21210520	uaaaa	uaaaa	3.702	0.000107	HNRNPDL	3.97062	HNRNPC	HNRNPC:E001	RBPmap
10	chr14:21211316	amahwca	acagaca	3.701	0.000107	IGF2BP3	3.97062	HNRNPC	HNRNPC:E018	RBPmap
15	chr8:17676002	uacuu	uacau	3.702	0.000107	RBM41	3.97062	MTUS1	MTUS1:E031	RBPmap
381	chr8:140658280	uaauua	uaauua	3.701	0.000107	RBM47	3.97062	PTK2	PTK2:E001	RBPmap
212	chr17:76043586	uuuduuu	uuuguuu	3.701	0.000107	ZC3H14	3.97062	SRP68	SRP68:E010	RBPmap
57	chr8:140669792	agagaaa	aaagaaa	3.699	0.000108	Fusip1	3.96658	PTK2	PTK2:E021	CisRBP
33	chr8:140770832	agagaaa	auagaaa	3.699	0.000108	Fusip1	3.96658	PTK2	PTK2:E084	CisRBP
250	chr11:14278931	agaaaaa	aaaaaaa	3.699	0.000108	PABPC1	3.96658	RRAS2	RRAS2:E004	CisRBP
251	chr11:14278932	agaaaaa	aaaaaaa	3.699	0.000108	PABPC1	3.96658	RRAS2	RRAS2:E004	CisRBP
241	chr14:21263233	uaaua	uagua	3.7	0.000108	ZFP36	3.96658	HNRNPC	HNRNPC:E056	RBPmap
14	chr14:21263324	aaaaaar	caaaaaa	3.7	0.000108	ABPC4	3.96658	HNRNPC	HNRNPC:E057	RBPmap
16	chr14:21263326	aaaaaar	aaaaaau	3.7	0.000108	ABPC4	3.96658	HNRNPC	HNRNPC:E057	RBPmap
71	chr14:21263653	aaaaaar	uaaaaaa	3.7	0.000108	ABPC4	3.96658	HNRNPC	HNRNPC:E059	RBPmap
219	chr8:17653717	gccca	gccca	3.7	0.000108	HNRNPK	3.96658	MTUS1	MTUS1:E016	RBPmap
239	chr8:17653737	gccca	gccca	3.7	0.000108	HNRNPK	3.96658	MTUS1	MTUS1:E016	RBPmap
57	chr8:140669792	agagavm	aaagaaa	3.699	0.000108	SRSF10	3.96658	PTK2	PTK2:E021	RBPmap
33	chr8:140770832	agagavm	auagaaa	3.699	0.000108	SRSF10	3.96658	PTK2	PTK2:E084	RBPmap
110	chr8:141001047	gccca	gccca	3.7	0.000108	HNRNPK	3.96658	PTK2	PTK2:E139	RBPmap
212	chr17:76041190	aauaaa	aauaaa	3.7	0.000108	KHDRBS3	3.96658	SRP68	SRP68:E009	RBPmap
1265	chr8:17645068	uagauag	uaguuug	3.697	0.000109	HNRPDL	3.96257	MTUS1	MTUS1:E003	CisRBP
84	chr3:48694428	auuaau	uuuaaa	3.698	0.000109	ZCRB1	3.96257	IP6K2	IP6K2:E027	RBPmap
1278	chr8:17645081	uauag	uauag	3.697	0.000109	HNRNPA0	3.96257	MTUS1	MTUS1:E003	RBPmap
1278	chr8:17645081	auuaguu	uauagaa	3.698	0.000109	MSI1	3.96257	MTUS1	MTUS1:E003	RBPmap
159	chr8:140735445	uacaca	cauaca	3.697	0.000109	HNRNPL	3.96257	PTK2	PTK2:E051	RBPmap
154	chr1:52992951	hauaua	uguaua	3.698	0.000109	RBMS3	3.96257	RRAS2	RRAS2:E005	RBPmap
100	chr17:76048070	uacaca	gacaca	3.697	0.000109	HNRNPL	3.96257	SRP68	SRP68:E017	RBPmap
21	chr7:105388811	gcgcgg	acgcgg	3.698	0.000109	RBM4B	3.96257	SRPK2	SRPK2:E048	RBPmap
299	chr14:21263291	aaaaaaa	aaaaaau	3.694	0.00011	PABPC4	3.95861	HNRNPC	HNRNPC:E056	CisRBP
49	chr7:105306484	aaaaaaa	caaaaaa	3.694	0.00011	PABPC4	3.95861	SRPK2	SRPK2:E046	CisRBP
14	chr16:1414734	gcgcgcg	ccccgcc	3.696	0.00011	PPRC1	3.95861	UNKL	UNKL:E050	CisRBP
71	chr14:21262839	uaaaa	uaaaa	3.694	0.00011	HNRNPDL	3.95861	HNRNPC	HNRNPC:E055	RBPmap
106	chr14:21262874	rauaaam	aacaaaa	3.694	0.00011	KHDRBS2	3.95861	HNRNPC	HNRNPC:E055	RBPmap
596	chr14:21264425	grhuuaa	gaauuaa	3.695	0.00011	ZCRB1	3.95861	HNRNPC	HNRNPC:E061	RBPmap
55	chr8:17645716	uuuuuub	uuuuugg	3.696	0.00011	RALY	3.95861	MTUS1	MTUS1:E004	RBPmap
18	chr8:17723851	araaaam	acaaaaa	3.696	0.00011	ABPC1	3.95861	MTUS1	MTUS1:E058	RBPmap
194	chr8:140659266	araaaam	aaaaaaa	3.696	0.00011	ABPC1	3.95861	PTK2	PTK2:E008	RBPmap
33	chr8:140746893	chuuuuu	uuuuuuu	3.694	0.00011	CPEB2	3.95861	PTK2	PTK2:E066	RBPmap
34	chr8:140746894	chuuuuu	uuuuuuu	3.694	0.00011	CPEB2	3.95861	PTK2	PTK2:E066	RBPmap
35	chr8:140746895	chuuuuu	uuuuuuu	3.694	0.00011	CPEB2	3.95861	PTK2	PTK2:E066	RBPmap
32	chr8:140746892	uuuuuu	cuuuuu	3.696	0.00011	CPEB4	3.95861	PTK2	PTK2:E066	RBPmap
120	chr1:52992917	uaaaa	uaaaa	3.694	0.00011	HNRNPDL	3.95861	RRAS2	RRAS2:E005	RBPmap
671	chr7:105117047	uaaaa	uaaaa	3.694	0.00011	HNRNPDL	3.95861	SRPK2	SRPK2:E005	RBPmap
202	chr7:105143285	uuuuuuuuu	guuucuuuu	3.694	0.00011	RBM24	3.95861	SRPK2	SRPK2:E025	RBPmap
61	chr8:140669796	gaaaacc	aaaaaca	3.693	0.000111	PABPC3	3.95468	PTK2	PTK2:E021	CisRBP
8	chr7:105116384	gaaaacc	aaaaaac	3.693	0.000111	PABPC3	3.95468	SRPK2	SRPK2:E005	CisRBP
154	chr14:21210766	amayama	gcacacu	3.693	0.000111	HNRNPL	3.95468	HNRNPC	HNRNPC:E007	RBPmap
1081	chr8:17644884	gguaguag	aaaaguag	3.692	0.000111	HNRNPA2B1	3.95468	MTUS1	MTUS1:E003	RBPmap
45	chr8:140658449	auauau	uuauau	3.693	0.000111	RBMS3	3.95468	PTK2	PTK2:E005	RBPmap
147	chr8:140735191	akgavmr	aggagga	3.692	0.000111	SRSF9	3.95468	PTK2	PTK2:E049	RBPmap
51	chr11:14278732	gguaguag	aggaguag	3.692	0.000111	HNRNPA2B1	3.95468	RRAS2	RRAS2:E004	RBPmap
86	chr11:14308292	garggwr	gaaggaa	3.692	0.000111	RBM5	3.95468	RRAS2	RRAS2:E016	RBPmap
42	chr7:105117567	amayama	ucacaca	3.693	0.000111	HNRNPL	3.95468	SRPK2	SRPK2:E012	RBPmap
100	chr14:21262868	aaaaaar	uaaaaaa	3.691	0.000112	ABPC4	3.95078	HNRNPC	HNRNPC:E055	RBPmap
114	chr14:21262882	aaaaaar	uaaaaaa	3.691	0.000112	ABPC4	3.95078	HNRNPC	HNRNPC:E055	RBPmap
11	chr14:21263347	aaaaaar	acaaaaa	3.691	0.000112	ABPC4	3.95078	HNRNPC	HNRNPC:E058	RBPmap
638	chr14:21264467	aaaaaar	aaaaaaa	3.691	0.000112	ABPC4	3.95078	HNRNPC	HNRNPC:E061	RBPmap
167	chr3:48693687	acacrav	acaaaac	3.69	0.000112	HNRNPL	3.95078	IP6K2	IP6K2:E019	RBPmap
134	chr17:76041112	acacrav	acaaaac	3.69	0.000112	HNRNPL	3.95078	SRP68	SRP68:E009	RBPmap
139	chr17:76041117	acacrav	acaaaac	3.69	0.000112	HNRNPL	3.95078	SRP68	SRP68:E009	RBPmap
79	chr16:1367791	gggggggg	gggggagg	3.69	0.000112	EWSR1	3.95078	UNKL	UNKL:E014	RBPmap
99	chr14:21262867	agaaaaa	auaaaaa	3.689	0.000113	PABPC1	3.94692	HNRNPC	HNRNPC:E055	CisRBP
113	chr14:21262881	agaaaaa	auaaaaa	3.689	0.000113	PABPC1	3.94692	HNRNPC	HNRNPC:E055	CisRBP
50	chr8:17755061	aacauca	cacauca	3.687	0.000113	YB-1	3.94692	MTUS1	MTUS1:E063	CisRBP
299	chr7:105142306	aacauca	aucauca	3.688	0.000113	CSDA	3.94692	SRPK2	SRPK2:E023	CisRBP
29	chr8:17674865	aaaauaa	aaaaaaa	3.688	0.000113	NUPL2	3.94692	MTUS1	MTUS1:E027	RBPmap
30	chr8:17674866	aaaauaa	aaaaaaa	3.688	0.000113	NUPL2	3.94692	MTUS1	MTUS1:E027	RBPmap
31	chr8:17674867	aaaauaa	aaaaaaa	3.688	0.000113	NUPL2	3.94692	MTUS1	MTUS1:E027	RBPmap
100	chr8:140669835	amahwca	aaaaaca	3.687	0.000113	IGF2BP3	3.94692	PTK2	PTK2:E021	RBPmap
251	chr1:52993219	cuuucu	cuuucu	3.688	0.000113	TBP3	3.94692	RRAS2	RRAS2:E007	RBPmap
135	chr11:14358897	cgcgc	ugcgc	3.687	0.000113	FUS	3.94692	RRAS2	RRAS2:E023	RBPmap
299	chr7:105142306	aacaucd	aucauca	3.688	0.000113	YBX1	3.94692	SRPK2	SRPK2:E023	RBPmap
18	chr16:1414738	gcccc	gcccc	3.687	0.000113	SRSF5	3.94692	UNKL	UNKL:E050	RBPmap
46	chr8:17653470	cuuuucu	cuuuucu	3.685	0.000114	PTBP1	3.9431	MTUS1	MTUS1:E015	CisRBP
46	chr8:140954788	aaaaaaa	aaaaaaa	3.685	0.000114	PABPC4	3.9431	PTK2	PTK2:E132	CisRBP
79	chr14:21209214	kauauas	cauauaa	3.685	0.000114	RBMS1	3.9431	HNRNPC	HNRNPC:E001	RBPmap
274	chr8:17723514	uuuuubk	uuuuuuu	3.686	0.000114	TIA1	3.9431	MTUS1	MTUS1:E056	RBPmap
275	chr8:17723515	uuuuubk	uuuuuuu	3.686	0.000114	TIA1	3.9431	MTUS1	MTUS1:E056	RBPmap
365	chr8:140658264	araaaam	auaaaaa	3.686	0.000114	ABPC1	3.9431	PTK2	PTK2:E001	RBPmap
365	chr8:140658264	araaaam	auaaaaa	3.686	0.000114	SART3	3.9431	PTK2	PTK2:E001	RBPmap
59	chr8:140669794	araaaam	agaaaaa	3.686	0.000114	SART3	3.9431	PTK2	PTK2:E021	RBPmap
224	chr7:105143307	uauguuu	uuuguuu	3.686	0.000114	CELF1	3.9431	SRPK2	SRPK2:E025	RBPmap
877	chr16:1364082	vmahwca	aaauaca	3.685	0.000114	IGF2BP2	3.9431	UNKL	UNKL:E002	RBPmap
68	chr6:41941019	gcgcgcg	gggcgcg	3.684	0.000115	PPRC1	3.9393	CCND3	CCND3:E024	CisRBP
30	chr3:48694854	ccaaauu	caaaauc	3.684	0.000115	HNRNPR	3.9393	IP6K2	IP6K2:E034	CisRBP
686	chr17:78203437	uacaca	gacaca	3.684	0.000115	HNRNPL	3.9393	AFMID	AFMID:E017	RBPmap
316	chr14:21264145	uauaga	aauaga	3.683	0.000115	UNK	3.9393	HNRNPC	HNRNPC:E061	RBPmap
274	chr8:17723514	huuuuuk	uuuuuuu	3.684	0.000115	HNRNPCL1	3.9393	MTUS1	MTUS1:E056	RBPmap
275	chr8:17723515	huuuuuk	uuuuuuu	3.684	0.000115	HNRNPCL1	3.9393	MTUS1	MTUS1:E056	RBPmap
880	chr16:1364085	uacaca	uacaaa	3.684	0.000115	HNRNPL	3.9393	UNKL	UNKL:E002	RBPmap
1382	chr14:21210517	uaaua	uaaua	3.682	0.000116	ZFP36	3.93554	HNRNPC	HNRNPC:E001	RBPmap
103	chr14:21262871	raaaacm	aaaaaca	3.682	0.000116	ABPC3	3.93554	HNRNPC	HNRNPC:E055	RBPmap
99	chr14:21262867	aaaaaar	auaaaaa	3.682	0.000116	ABPC4	3.93554	HNRNPC	HNRNPC:E055	RBPmap
113	chr14:21262881	aaaaaar	auaaaaa	3.682	0.000116	ABPC4	3.93554	HNRNPC	HNRNPC:E055	RBPmap
217	chr14:21263209	uaaua	uauua	3.682	0.000116	ZFP36	3.93554	HNRNPC	HNRNPC:E056	RBPmap
77	chr14:21263659	raaaacm	aaaaaca	3.682	0.000116	ABPC3	3.93554	HNRNPC	HNRNPC:E059	RBPmap
18	chr8:17723851	aaaaaar	acaaaaa	3.682	0.000116	ABPC4	3.93554	MTUS1	MTUS1:E058	RBPmap
366	chr8:140658265	aaaaaar	uaaaaaa	3.682	0.000116	ABPC4	3.93554	PTK2	PTK2:E001	RBPmap
5	chr8:140718360	gcgcagc	cugcagc	3.681	0.000116	MBNL1	3.93554	PTK2	PTK2:E047	RBPmap
14	chr8:140718369	gcgcagc	cugcagc	3.681	0.000116	MBNL1	3.93554	PTK2	PTK2:E047	RBPmap
30	chr16:1370262	gcgag	gcgag	3.682	0.000116	EIF4G2	3.93554	UNKL	UNKL:E018	RBPmap
62	chr16:1385269	gcgcagc	gggcagc	3.681	0.000116	MBNL1	3.93554	UNKL	UNKL:E026	RBPmap
108	chr14:21262876	caaaaag	caaaaau	3.679	0.000117	SYNCRIP	3.93181	HNRNPC	HNRNPC:E055	CisRBP
102	chr6:41935997	gckgghm	gcuggag	3.679	0.000117	SAMD4A	3.93181	CCND3	CCND3:E006	RBPmap
40	chr6:42048748	gargag	gaggag	3.68	0.000117	HNRNPH1	3.93181	CCND3	CCND3:E041	RBPmap
223	chr14:21263215	uauaag	uauaau	3.679	0.000117	RR3	3.93181	HNRNPC	HNRNPC:E056	RBPmap
234	chr3:48688236	acacag	acagag	3.679	0.000117	CNOT4	3.93181	IP6K2	IP6K2:E001	RBPmap
121	chr3:48694992	gagug	gagug	3.679	0.000117	TARDBP	3.93181	IP6K2	IP6K2:E035	RBPmap
274	chr8:17723514	huuuuuk	uuuuuuu	3.679	0.000117	HNRNPC	3.93181	MTUS1	MTUS1:E056	RBPmap
275	chr8:17723515	huuuuuk	uuuuuuu	3.679	0.000117	HNRNPC	3.93181	MTUS1	MTUS1:E056	RBPmap
97	chr8:140669832	auaaav	cauaaa	3.679	0.000117	KHDRBS3	3.93181	PTK2	PTK2:E021	RBPmap
146	chr1:52992943	uauguau	caugucu	3.68	0.000117	FUBP1	3.93181	RRAS2	RRAS2:E005	RBPmap
101	chr17:76048071	acacag	acacaa	3.679	0.000117	CNOT4	3.93181	SRP68	SRP68:E017	RBPmap
44	chr7:105117569	acacag	acacaa	3.679	0.000117	CNOT4	3.93181	SRPK2	SRPK2:E012	RBPmap
49	chr7:105117574	acacag	acacaa	3.679	0.000117	CNOT4	3.93181	SRPK2	SRPK2:E012	RBPmap
14	chr14:21263324	aaaaaaa	caaaaaa	3.676	0.000118	PABPC4	3.92812	HNRNPC	HNRNPC:E057	CisRBP
16	chr14:21263326	aaaaaaa	aaaaaau	3.676	0.000118	PABPC4	3.92812	HNRNPC	HNRNPC:E057	CisRBP
71	chr14:21263653	aaaaaaa	uaaaaaa	3.676	0.000118	PABPC4	3.92812	HNRNPC	HNRNPC:E059	CisRBP
167	chr3:48693687	acacaaa	acaaaac	3.676	0.000118	ENSG00000215042	3.92812	IP6K2	IP6K2:E019	CisRBP
43	chr3:48715460	auugcaca	cuggcaca	3.677	0.000118	SNRPB2	3.92812	IP6K2	IP6K2:E049	CisRBP
1046	chr8:17654544	aaaaaaa	aaaaaaa	3.676	0.000118	PABPC4	3.92812	MTUS1	MTUS1:E016	CisRBP
28	chr8:17674864	aaaaaaa	gaaaaaa	3.676	0.000118	PABPC4	3.92812	MTUS1	MTUS1:E027	CisRBP
32	chr8:17674868	aaaaaaa	aaaaaau	3.676	0.000118	PABPC4	3.92812	MTUS1	MTUS1:E027	CisRBP
134	chr17:76041112	acacaaa	acaaaac	3.676	0.000118	ENSG00000215042	3.92812	SRP68	SRP68:E009	CisRBP
139	chr17:76041117	acacaaa	acaaaac	3.676	0.000118	ENSG00000215042	3.92812	SRP68	SRP68:E009	CisRBP
63	chr8:17674899	acacrav	acacaau	3.676	0.000118	HNRNPL	3.92812	MTUS1	MTUS1:E027	RBPmap
77	chr8:17753793	uuuuuuuuu	uuuucuuuu	3.677	0.000118	RBM24	3.92812	MTUS1	MTUS1:E062	RBPmap
59	chr8:140669794	araaaam	agaaaaa	3.676	0.000118	ABPC1	3.92812	PTK2	PTK2:E021	RBPmap
160	chr8:141001097	agcccc	cgcccc	3.678	0.000118	CBP1	3.92812	PTK2	PTK2:E139	RBPmap
59	chr11:14358821	cgccg	agccg	3.676	0.000118	EIF4G2	3.92812	RRAS2	RRAS2:E023	RBPmap
142	chr11:14358904	cgccg	agccg	3.676	0.000118	EIF4G2	3.92812	RRAS2	RRAS2:E023	RBPmap
130	chr7:105399285	wugcacr	uugcaga	3.676	0.000118	SNRPA	3.92812	SRPK2	SRPK2:E053	RBPmap
74	chr16:1385281	gggggggg	gggggagg	3.676	0.000118	EWSR1	3.92812	UNKL	UNKL:E026	RBPmap
126	chr14:21262894	aaaauaa	aaaauac	3.675	0.000119	NUPL2	3.92445	HNRNPC	HNRNPC:E055	RBPmap
296	chr14:21263288	aaaauaa	aaaaaaa	3.675	0.000119	NUPL2	3.92445	HNRNPC	HNRNPC:E056	RBPmap
297	chr14:21263289	aaaauaa	aaaaaaa	3.675	0.000119	NUPL2	3.92445	HNRNPC	HNRNPC:E056	RBPmap
298	chr14:21263290	aaaauaa	aaaaaaa	3.675	0.000119	NUPL2	3.92445	HNRNPC	HNRNPC:E056	RBPmap
11	chr8:17723844	aaaauaa	aaaaaaa	3.675	0.000119	NUPL2	3.92445	MTUS1	MTUS1:E058	RBPmap
12	chr8:17723845	aaaauaa	aaaaaaa	3.675	0.000119	NUPL2	3.92445	MTUS1	MTUS1:E058	RBPmap
194	chr8:140659266	aaaauaa	aaaaaaa	3.675	0.000119	NUPL2	3.92445	PTK2	PTK2:E008	RBPmap
1281	chr8:140669705	gacaga	cacaaa	3.674	0.000119	CNOT4	3.92445	PTK2	PTK2:E019	RBPmap
33	chr8:140746893	huuuuuk	uuuuuuu	3.675	0.000119	HNRNPCL1	3.92445	PTK2	PTK2:E066	RBPmap
34	chr8:140746894	huuuuuk	uuuuuuu	3.675	0.000119	HNRNPCL1	3.92445	PTK2	PTK2:E066	RBPmap
35	chr8:140746895	huuuuuk	uuuuuuu	3.675	0.000119	HNRNPCL1	3.92445	PTK2	PTK2:E066	RBPmap
96	chr8:140890699	ugugukk	uguguga	3.675	0.000119	BRUNOL5	3.92445	PTK2	PTK2:E116	RBPmap
1387	chr14:21210522	amahwca	aaauaca	3.672	0.00012	IGF2BP3	3.92082	HNRNPC	HNRNPC:E001	RBPmap
79	chr3:48693032	uuguuu	uuguuu	3.673	0.00012	DAZ3	3.92082	IP6K2	IP6K2:E005	RBPmap
1093	chr8:17644896	uagkwwr	gagguag	3.672	0.00012	DAZAP1	3.92082	MTUS1	MTUS1:E003	RBPmap
365	chr8:140658264	aaaaaar	auaaaaa	3.673	0.00012	ABPC4	3.92082	PTK2	PTK2:E001	RBPmap
1274	chr8:140669698	amahwca	acagaca	3.672	0.00012	IGF2BP3	3.92082	PTK2	PTK2:E019	RBPmap
75	chr16:1367787	gggugggg	ggaugggg	3.672	0.00012	ILF2	3.92082	UNKL	UNKL:E014	RBPmap
103	chr14:21262871	gaaaacc	aaaaaca	3.67	0.000121	PABPC3	3.91721	HNRNPC	HNRNPC:E055	CisRBP
77	chr14:21263659	gaaaacc	aaaaaca	3.67	0.000121	PABPC3	3.91721	HNRNPC	HNRNPC:E059	CisRBP
194	chr8:140659266	agaaaaa	aaaaaaa	3.67	0.000121	PABPC1	3.91721	PTK2	PTK2:E008	CisRBP
245	chr17:78207650	auauau	uuauau	3.67	0.000121	RBMS3	3.91721	AFMID	AFMID:E034	RBPmap
1103	chr14:21210238	uacaca	aacaca	3.671	0.000121	HNRNPL	3.91721	HNRNPC	HNRNPC:E001	RBPmap
146	chr14:21230512	rausawd	aaucacu	3.671	0.000121	RBM46	3.91721	HNRNPC	HNRNPC:E036	RBPmap
250	chr14:21263242	uuaaca	guaaca	3.671	0.000121	SF1	3.91721	HNRNPC	HNRNPC:E056	RBPmap
1264	chr8:17645067	uuuduuu	uuaguuu	3.67	0.000121	ZC3H14	3.91721	MTUS1	MTUS1:E003	RBPmap
101	chr8:17723934	vmahwca	caaaaca	3.671	0.000121	IGF2BP2	3.91721	MTUS1	MTUS1:E058	RBPmap
161	chr8:141001098	gcccc	gcccc	3.67	0.000121	SRSF5	3.91721	PTK2	PTK2:E139	RBPmap
212	chr17:76043586	uukruuu	uuuguuu	3.67	0.000121	HuR	3.91721	SRP68	SRP68:E010	RBPmap
752	chr16:1365763	uacaca	cacaua	3.671	0.000121	HNRNPL	3.91721	UNKL	UNKL:E006	RBPmap
239	chr17:78207644	uaaaa	uaaaa	3.669	0.000122	HNRNPDL	3.91364	AFMID	AFMID:E034	RBPmap
84	chr3:48694428	uuuaa	uuuaa	3.669	0.000122	RBM15B	3.91364	IP6K2	IP6K2:E027	RBPmap
135	chr1:52992932	uaaaa	uaaaa	3.669	0.000122	HNRNPDL	3.91364	RRAS2	RRAS2:E005	RBPmap
139	chr17:76038923	uaaaa	uaaaa	3.669	0.000122	HNRNPDL	3.91364	SRP68	SRP68:E002	RBPmap
91	chr16:1363296	uuuaa	uuuaa	3.669	0.000122	RBM15B	3.91364	UNKL	UNKL:E002	RBPmap
100	chr14:21262868	aaaaaaa	uaaaaaa	3.667	0.000123	PABPC4	3.91009	HNRNPC	HNRNPC:E055	CisRBP
114	chr14:21262882	aaaaaaa	uaaaaaa	3.667	0.000123	PABPC4	3.91009	HNRNPC	HNRNPC:E055	CisRBP
11	chr14:21263347	aaaaaaa	acaaaaa	3.667	0.000123	PABPC4	3.91009	HNRNPC	HNRNPC:E058	CisRBP
638	chr14:21264467	aaaaaaa	aaaaaaa	3.667	0.000123	PABPC4	3.91009	HNRNPC	HNRNPC:E061	CisRBP
27	chr8:17674863	aaaaaaa	agaaaaa	3.667	0.000123	PABPC4	3.91009	MTUS1	MTUS1:E027	CisRBP
166	chr8:141001103	gcgcgcg	gcgcccg	3.667	0.000123	PPRC1	3.91009	PTK2	PTK2:E139	CisRBP
315	chr6:41935299	aauaaa	aauaaa	3.667	0.000123	KHDRBS2	3.91009	CCND3	CCND3:E004	RBPmap
58	chr14:21262756	aggaudr	aggagga	3.667	0.000123	G3BP2	3.91009	HNRNPC	HNRNPC:E054	RBPmap
61	chr14:21262759	aggaudr	aggaaga	3.667	0.000123	G3BP2	3.91009	HNRNPC	HNRNPC:E054	RBPmap
122	chr14:21262890	aauaaa	auuaaa	3.667	0.000123	KHDRBS3	3.91009	HNRNPC	HNRNPC:E055	RBPmap
93	chr3:48688095	aauaaa	aauaaa	3.667	0.000123	KHDRBS2	3.91009	IP6K2	IP6K2:E001	RBPmap
97	chr3:48688099	aauaaa	aauaaa	3.667	0.000123	KHDRBS2	3.91009	IP6K2	IP6K2:E001	RBPmap
75	chr3:48693028	uuuuubk	uuuuuug	3.667	0.000123	TIA1	3.91009	IP6K2	IP6K2:E005	RBPmap
15	chr3:48694189	gggaa	gggaa	3.667	0.000123	SRSF9	3.91009	IP6K2	IP6K2:E025	RBPmap
14	chr3:48694539	uauaag	uauaaa	3.667	0.000123	RR3	3.91009	IP6K2	IP6K2:E029	RBPmap
82	chr3:48694953	gragga	ggagaa	3.667	0.000123	SRSF1	3.91009	IP6K2	IP6K2:E035	RBPmap
132	chr3:48740337	gguugguu	ugcugguu	3.667	0.000123	HNRNP	3.91009	IP6K2	IP6K2:E072	RBPmap
1254	chr8:17645057	gguugguu	aguuaguu	3.667	0.000123	HNRNP	3.91009	MTUS1	MTUS1:E003	RBPmap
1258	chr8:17645061	gguugguu	aguuaguu	3.667	0.000123	HNRNP	3.91009	MTUS1	MTUS1:E003	RBPmap
1262	chr8:17645065	gguugguu	aguuaguu	3.667	0.000123	HNRNP	3.91009	MTUS1	MTUS1:E003	RBPmap
261	chr8:17723501	uuuuuyc	guuuuuc	3.667	0.000123	U2AF2	3.91009	MTUS1	MTUS1:E056	RBPmap
78	chr8:140890393	aauaaa	aauaaa	3.667	0.000123	KHDRBS2	3.91009	PTK2	PTK2:E113	RBPmap
166	chr8:141001103	ssgcgcs	gcgcccg	3.667	0.000123	RC1	3.91009	PTK2	PTK2:E139	RBPmap
110	chr17:76072454	gcgcagc	ccgccgc	3.667	0.000123	MBNL1	3.91009	SRP68	SRP68:E040	RBPmap
506	chr7:105143836	araaaam	agaaaaa	3.667	0.000123	SART3	3.91009	SRPK2	SRPK2:E026	RBPmap
755	chr16:1365766	cuauaa	auauaa	3.667	0.000123	ZNF326	3.91009	UNKL	UNKL:E006	RBPmap
75	chr16:1367787	gggagggg	ggaugggg	3.667	0.000123	HNRNPF	3.91009	UNKL	UNKL:E014	RBPmap
38	chr16:1379159	kgacarg	ggacaag	3.667	0.000123	FMR1	3.91009	UNKL	UNKL:E021	RBPmap
12	chr16:1414709	ssgcgcs	cagcgcg	3.667	0.000123	RC1	3.91009	UNKL	UNKL:E049	RBPmap
10	chr16:1414730	ssgcgcs	gcgcccc	3.667	0.000123	RC1	3.91009	UNKL	UNKL:E050	RBPmap
781	chr16:1365792	aaaaaaa	uaaaaaa	3.664	0.000124	PABPC4	3.90658	UNKL	UNKL:E006	CisRBP
248	chr14:21263240	uaaua	uagua	3.664	0.000124	ZFP36	3.90658	HNRNPC	HNRNPC:E056	RBPmap
19	chr14:21263355	aaaaaar	aaaaaua	3.664	0.000124	ABPC4	3.90658	HNRNPC	HNRNPC:E058	RBPmap
781	chr16:1365792	aaaaaar	uaaaaaa	3.664	0.000124	ABPC4	3.90658	UNKL	UNKL:E006	RBPmap
63	chr8:17674899	acacaaa	acacaau	3.662	0.000125	ENSG00000215042	3.90309	MTUS1	MTUS1:E027	CisRBP
90	chr8:17723923	aacauca	aacaaca	3.662	0.000125	CSDA	3.90309	MTUS1	MTUS1:E058	CisRBP
80	chr3:48693033	ugugukk	uguuugu	3.663	0.000125	BRUNOL5	3.90309	IP6K2	IP6K2:E005	RBPmap
197	chr8:140659269	aaaauaa	aaaacaa	3.662	0.000125	NUPL2	3.90309	PTK2	PTK2:E008	RBPmap
202	chr8:140659274	aaaauaa	aaaacaa	3.662	0.000125	NUPL2	3.90309	PTK2	PTK2:E008	RBPmap
363	chr11:14359125	cgcgc	uacgc	3.663	0.000125	FUS	3.90309	RRAS2	RRAS2:E023	RBPmap
7	chr17:76039557	acacrav	acacaag	3.662	0.000125	HNRNPL	3.90309	SRP68	SRP68:E005	RBPmap
225	chr7:105143308	uuguuu	uuguuu	3.663	0.000125	DAZ3	3.90309	SRPK2	SRPK2:E025	RBPmap
782	chr16:1365793	aaaauaa	aaaaaaa	3.662	0.000125	NUPL2	3.90309	UNKL	UNKL:E006	RBPmap
783	chr16:1365794	aaaauaa	aaaaaaa	3.662	0.000125	NUPL2	3.90309	UNKL	UNKL:E006	RBPmap
784	chr16:1365795	aaaauaa	aaaaaaa	3.662	0.000125	NUPL2	3.90309	UNKL	UNKL:E006	RBPmap
365	chr8:140658264	agaaaaa	auaaaaa	3.66	0.000126	PABPC1	3.89963	PTK2	PTK2:E001	CisRBP
62	chr6:42010899	uuuuuub	uuuuuua	3.661	0.000126	RALY	3.89963	CCND3	CCND3:E030	RBPmap
1381	chr14:21210516	auaaaav	auaauaa	3.66	0.000126	KHDRBS1	3.89963	HNRNPC	HNRNPC:E001	RBPmap
12	chr16:1414732	gcccc	gcccc	3.661	0.000126	SRSF5	3.89963	UNKL	UNKL:E050	RBPmap
99	chr14:21262867	aaaaaaa	auaaaaa	3.658	0.000127	PABPC4	3.8962	HNRNPC	HNRNPC:E055	CisRBP
113	chr14:21262881	aaaaaaa	auaaaaa	3.658	0.000127	PABPC4	3.8962	HNRNPC	HNRNPC:E055	CisRBP
693	chr7:105117069	ccaaauu	caaaauc	3.658	0.000127	HNRNPR	3.8962	SRPK2	SRPK2:E005	CisRBP
77	chr14:21263659	vmahwca	aaaaaca	3.658	0.000127	IGF2BP2	3.8962	HNRNPC	HNRNPC:E059	RBPmap
163	chr3:48693683	vmahwca	gcaaaca	3.658	0.000127	IGF2BP2	3.8962	IP6K2	IP6K2:E019	RBPmap
4	chr3:48694828	uacaca	aacaua	3.658	0.000127	HNRNPL	3.8962	IP6K2	IP6K2:E034	RBPmap
1268	chr8:17645071	uuuguuu	uuuguuu	3.658	0.000127	BOLL	3.8962	MTUS1	MTUS1:E003	RBPmap
308	chr8:140658937	auauau	uuauau	3.659	0.000127	RBMS3	3.8962	PTK2	PTK2:E006	RBPmap
193	chr8:140659265	raaaacm	gaaaaaa	3.659	0.000127	ABPC3	3.8962	PTK2	PTK2:E008	RBPmap
155	chr8:140735441	uacaca	cccaca	3.658	0.000127	HNRNPL	3.8962	PTK2	PTK2:E051	RBPmap
32	chr8:140746892	huuuuuk	cuuuuuu	3.658	0.000127	HNRNPCL1	3.8962	PTK2	PTK2:E066	RBPmap
39	chr17:76040941	ugcaca	cgcacu	3.658	0.000127	SNRPA	3.8962	SRP68	SRP68:E008	RBPmap
45	chr7:105110748	uauaga	uauagg	3.659	0.000127	UNK	3.8962	SRPK2	SRPK2:E001	RBPmap
494	chr7:105143824	caaagg	caaagg	3.659	0.000127	NUPL2	3.8962	SRPK2	SRPK2:E026	RBPmap
93	chr7:105142429	aucaacg	uucaucu	3.656	0.000128	SRSF3	3.89279	SRPK2	SRPK2:E024	CisRBP
506	chr7:105143836	agaaaaa	agaaaaa	3.657	0.000128	PABPC1	3.89279	SRPK2	SRPK2:E026	CisRBP
79	chr14:21209214	hauaua	cauaua	3.656	0.000128	RBMS3	3.89279	HNRNPC	HNRNPC:E001	RBPmap
43	chr8:17722032	caacaca	caaaaca	3.657	0.000128	IGF2BP2	3.89279	MTUS1	MTUS1:E052	RBPmap
41	chr8:140765012	auuaau	auuaau	3.656	0.000128	ZCRB1	3.89279	PTK2	PTK2:E081	RBPmap
165	chr8:140879326	wuaauur	auaauua	3.656	0.000128	A1CF	3.89279	PTK2	PTK2:E106	RBPmap
22	chr8:141002132	gggugggg	gggugggg	3.656	0.000128	ILF2	3.89279	PTK2	PTK2:E153	RBPmap
506	chr7:105143836	araaaam	agaaaaa	3.657	0.000128	ABPC1	3.89279	SRPK2	SRPK2:E026	RBPmap
81	chr16:1367793	gggaggg	gggaggg	3.656	0.000128	HNRNPH2	3.89279	UNKL	UNKL:E014	RBPmap
17	chr16:1414737	agcccc	cgcccc	3.656	0.000128	CBP1	3.89279	UNKL	UNKL:E050	RBPmap
295	chr14:21263287	aaaaaar	uaaaaaa	3.655	0.000129	ABPC4	3.88941	HNRNPC	HNRNPC:E056	RBPmap
1287	chr8:17645090	auuagu	auuagg	3.654	0.000129	HNRNPA0	3.88941	MTUS1	MTUS1:E003	RBPmap
195	chr8:140659267	aaaaaar	aaaaaac	3.655	0.000129	ABPC4	3.88941	PTK2	PTK2:E008	RBPmap
196	chr8:140659268	aaaaaar	aaaaaca	3.655	0.000129	ABPC4	3.88941	PTK2	PTK2:E008	RBPmap
69	chr8:140764490	acacag	acacag	3.654	0.000129	CNOT4	3.88941	PTK2	PTK2:E080	RBPmap
80	chr16:1367792	ggggag	ggggag	3.655	0.000129	RBM25	3.88941	UNKL	UNKL:E014	RBPmap
266	chr6:41941427	gggagggg	ggaggggg	3.652	0.00013	HNRNPF	3.88606	CCND3	CCND3:E025	RBPmap
75	chr3:48693028	uuuuuub	uuuuuug	3.652	0.00013	RALY	3.88606	IP6K2	IP6K2:E005	RBPmap
104	chr17:76072448	gcgcagc	ccgccgc	3.653	0.00013	MBNL1	3.88606	SRP68	SRP68:E040	RBPmap
107	chr17:76072451	gcgcagc	ccgccgc	3.653	0.00013	MBNL1	3.88606	SRP68	SRP68:E040	RBPmap
754	chr16:1365765	uauauag	cauauaa	3.653	0.00013	DAZAP1	3.88606	UNKL	UNKL:E006	RBPmap
18	chr8:17723851	agaaaaa	acaaaaa	3.65	0.000131	PABPC1	3.88273	MTUS1	MTUS1:E058	CisRBP
141	chr8:140658770	caaaaag	caaaaaa	3.65	0.000131	SYNCRIP	3.88273	PTK2	PTK2:E006	CisRBP
59	chr8:140669794	agaaaaa	agaaaaa	3.65	0.000131	PABPC1	3.88273	PTK2	PTK2:E021	CisRBP
1266	chr8:17645069	gguugguu	aguuuguu	3.651	0.000131	HNRNP	3.88273	MTUS1	MTUS1:E003	RBPmap
94	chr8:140890697	ugugukk	ggugugu	3.65	0.000131	BRUNOL5	3.88273	PTK2	PTK2:E116	RBPmap
371	chr11:14359133	cgcgc	uccgc	3.651	0.000131	FUS	3.88273	RRAS2	RRAS2:E023	RBPmap
7	chr17:76039557	acacaaa	acacaag	3.648	0.000132	ENSG00000215042	3.87943	SRP68	SRP68:E005	CisRBP
101	chr17:76048071	acacaaa	acacaaa	3.648	0.000132	ENSG00000215042	3.87943	SRP68	SRP68:E017	CisRBP
563	chr16:1365574	aacauca	aacaucu	3.649	0.000132	CSDA	3.87943	UNKL	UNKL:E006	CisRBP
72	chr6:41941023	rygcgcb	gcgcgcc	3.649	0.000132	RBM8A	3.87943	CCND3	CCND3:E024	RBPmap
254	chr6:41941415	gggggggg	gggagcgg	3.648	0.000132	EWSR1	3.87943	CCND3	CCND3:E025	RBPmap
119	chr14:21262887	aaaauaa	aaaauua	3.649	0.000132	NUPL2	3.87943	HNRNPC	HNRNPC:E055	RBPmap
211	chr8:17644014	uauauua	uauauua	3.648	0.000132	RC3H1	3.87943	MTUS1	MTUS1:E003	RBPmap
90	chr8:17723923	aacaucd	aacaaca	3.649	0.000132	YBX1	3.87943	MTUS1	MTUS1:E058	RBPmap
67	chr8:140658471	auauau	uuauau	3.648	0.000132	RBMS3	3.87943	PTK2	PTK2:E005	RBPmap
60	chr8:140669795	raaaacm	gaaaaac	3.648	0.000132	ABPC3	3.87943	PTK2	PTK2:E021	RBPmap
78	chr7:105117465	auauau	uuauau	3.648	0.000132	RBMS3	3.87943	SRPK2	SRPK2:E009	RBPmap
563	chr16:1365574	aacaucd	aacaucu	3.649	0.000132	YBX1	3.87943	UNKL	UNKL:E006	RBPmap
205	chr6:41941724	gcgcgcg	gggcgcg	3.646	0.000133	PPRC1	3.87615	CCND3	CCND3:E027	CisRBP
45	chr6:41941811	gcgcgcg	gcgcccc	3.646	0.000133	PPRC1	3.87615	CCND3	CCND3:E029	CisRBP
88	chr14:21263754	guuggaa	ucuggaa	3.647	0.000133	EIF4B	3.87615	HNRNPC	HNRNPC:E060	CisRBP
5	chr14:21263587	araaaam	agaaaaa	3.647	0.000133	SART3	3.87615	HNRNPC	HNRNPC:E059	RBPmap
9	chr8:140718364	agcagc	agccgc	3.646	0.000133	SRSF8	3.87615	PTK2	PTK2:E047	RBPmap
8	chr11:14337008	araaaam	agaaaaa	3.647	0.000133	SART3	3.87615	RRAS2	RRAS2:E017	RBPmap
13	chr14:21211319	uacaca	gacaca	3.645	0.000134	HNRNPL	3.8729	HNRNPC	HNRNPC:E018	RBPmap
6	chr14:21211312	vmahwca	agaaaca	3.644	0.000134	IGF2BP2	3.8729	HNRNPC	HNRNPC:E018	RBPmap
10	chr14:21211316	vmahwca	acagaca	3.644	0.000134	IGF2BP2	3.8729	HNRNPC	HNRNPC:E018	RBPmap
55	chr8:17753771	uuguuu	uuguuu	3.644	0.000134	DAZ3	3.8729	MTUS1	MTUS1:E062	RBPmap
298	chr8:140658927	kauauas	aauauag	3.644	0.000134	RBMS1	3.8729	PTK2	PTK2:E006	RBPmap
578	chr1:52992401	vmahwca	aaaaaca	3.644	0.000134	IGF2BP2	3.8729	RRAS2	RRAS2:E003	RBPmap
19	chr17:76061593	gragga	ggagga	3.645	0.000134	SRSF1	3.8729	SRP68	SRP68:E030	RBPmap
78	chr16:1367790	ugggrad	uggggga	3.645	0.000134	ESRP2	3.8729	UNKL	UNKL:E014	RBPmap
53	chr16:1394183	gcgcgu	gcgcau	3.644	0.000134	RBM4	3.8729	UNKL	UNKL:E029	RBPmap
5	chr16:1414060	vmahwca	aaacaca	3.644	0.000134	IGF2BP2	3.8729	UNKL	UNKL:E045	RBPmap
107	chr14:21262875	amahwca	acaaaaa	3.642	0.000135	IGF2BP3	3.86967	HNRNPC	HNRNPC:E055	RBPmap
77	chr14:21263659	amahwca	aaaaaca	3.642	0.000135	IGF2BP3	3.86967	HNRNPC	HNRNPC:E059	RBPmap
9	chr8:17653194	uuuuuu	cuuuuu	3.643	0.000135	CPEB4	3.86967	MTUS1	MTUS1:E014	RBPmap
32	chr8:140746892	huuuuuk	cuuuuuu	3.643	0.000135	HNRNPC	3.86967	PTK2	PTK2:E066	RBPmap
33	chr8:140746893	huuuuuk	uuuuuuu	3.643	0.000135	HNRNPC	3.86967	PTK2	PTK2:E066	RBPmap
34	chr8:140746894	huuuuuk	uuuuuuu	3.643	0.000135	HNRNPC	3.86967	PTK2	PTK2:E066	RBPmap
35	chr8:140746895	huuuuuk	uuuuuuu	3.643	0.000135	HNRNPC	3.86967	PTK2	PTK2:E066	RBPmap
159	chr8:141001096	gcccc	gcgcc	3.643	0.000135	SRSF5	3.86967	PTK2	PTK2:E139	RBPmap
166	chr8:141001103	gcccc	gcgcc	3.643	0.000135	SRSF5	3.86967	PTK2	PTK2:E139	RBPmap
155	chr1:52992952	auauaa	guauau	3.643	0.000135	RBMS2	3.86967	RRAS2	RRAS2:E005	RBPmap
251	chr1:52993219	cuuucu	cuuucu	3.642	0.000135	TB3	3.86967	RRAS2	RRAS2:E007	RBPmap
225	chr7:105116601	cuauaa	cuauau	3.642	0.000135	ZNF326	3.86967	SRPK2	SRPK2:E005	RBPmap
19	chr14:21263355	aaaaaaa	aaaaaua	3.64	0.000136	PABPC4	3.86646	HNRNPC	HNRNPC:E058	CisRBP
18	chr8:17723851	aaaaaaa	acaaaaa	3.64	0.000136	PABPC4	3.86646	MTUS1	MTUS1:E058	CisRBP
366	chr8:140658265	aaaaaaa	uaaaaaa	3.64	0.000136	PABPC4	3.86646	PTK2	PTK2:E001	CisRBP
2	chr3:48694176	gggaa	gggaa	3.64	0.000136	SRSF9	3.86646	IP6K2	IP6K2:E025	RBPmap
83	chr3:48694323	acacag	acagag	3.641	0.000136	CNOT4	3.86646	IP6K2	IP6K2:E026	RBPmap
94	chr3:48695515	amayama	acaaaca	3.64	0.000136	HNRNPL	3.86646	IP6K2	IP6K2:E041	RBPmap
1139	chr8:17644942	garggwr	aaaggaa	3.641	0.000136	RBM5	3.86646	MTUS1	MTUS1:E003	RBPmap
30	chr8:140718385	gcagc	gcagc	3.64	0.000136	SRSF5	3.86646	PTK2	PTK2:E047	RBPmap
133	chr1:52991956	amayama	aaacaaa	3.64	0.000136	HNRNPL	3.86646	RRAS2	RRAS2:E003	RBPmap
15	chr16:1379660	ssgcgcs	ccgcgcc	3.641	0.000136	RC1	3.86646	UNKL	UNKL:E024	RBPmap
4	chr17:76060394	agagaaa	agagaga	3.639	0.000137	Fusip1	3.86328	SRP68	SRP68:E024	CisRBP
8	chr14:21230905	araaga	agaaga	3.639	0.000137	ABPN1	3.86328	HNRNPC	HNRNPC:E037	RBPmap
78	chr3:48693031	uuuduuu	uuuguuu	3.639	0.000137	ZC3H14	3.86328	IP6K2	IP6K2:E005	RBPmap
170	chr8:140735214	ccccacccc	cccccaccc	3.639	0.000137	CBP2	3.86328	PTK2	PTK2:E049	RBPmap
353	chr11:14359115	cgcgc	cgcgc	3.639	0.000137	FUS	3.86328	RRAS2	RRAS2:E023	RBPmap
37	chr16:1367128	gcgcagc	cugcagc	3.639	0.000137	MBNL1	3.86328	UNKL	UNKL:E010	RBPmap
74	chr16:1385281	ggggg	ggggg	3.638	0.000137	RBM24	3.86328	UNKL	UNKL:E026	RBPmap
193	chr8:140659265	gaaaacc	gaaaaaa	3.636	0.000138	PABPC3	3.86012	PTK2	PTK2:E008	CisRBP
56	chr6:41940465	agcagc	ugcaga	3.636	0.000138	SRSF2	3.86012	CCND3	CCND3:E021	RBPmap
4	chr14:21263340	aaaaaar	uaaaaaa	3.636	0.000138	ABPC4	3.86012	HNRNPC	HNRNPC:E058	RBPmap
5	chr14:21263587	araaaam	agaaaaa	3.637	0.000138	ABPC1	3.86012	HNRNPC	HNRNPC:E059	RBPmap
76	chr3:48693255	uukruuu	uuguuuu	3.637	0.000138	HuR	3.86012	IP6K2	IP6K2:E012	RBPmap
593	chr8:17644396	uguanaua	uguagauu	3.636	0.000138	UM2	3.86012	MTUS1	MTUS1:E003	RBPmap
15	chr8:17723848	aaaauaa	aaaacaa	3.636	0.000138	NUPL2	3.86012	MTUS1	MTUS1:E058	RBPmap
77	chr8:140890392	uaauua	uaauaa	3.636	0.000138	A1CF	3.86012	PTK2	PTK2:E113	RBPmap
8	chr11:14337008	araaaam	agaaaaa	3.637	0.000138	ABPC1	3.86012	RRAS2	RRAS2:E017	RBPmap
35	chr7:105388825	gcgcgss	gggcggg	3.637	0.000138	RBM4	3.86012	SRPK2	SRPK2:E048	RBPmap
786	chr16:1365797	raaaacm	aaaaaca	3.636	0.000138	ABPC3	3.86012	UNKL	UNKL:E006	RBPmap
92	chr6:41941611	rygcgcb	gggcgcg	3.635	0.000139	RBM8A	3.85699	CCND3	CCND3:E027	RBPmap
1269	chr8:17645072	uuguuu	uuguuu	3.635	0.000139	DAZ3	3.85699	MTUS1	MTUS1:E003	RBPmap
41	chr8:17645702	uuuuuu	uuuuuu	3.635	0.000139	CPEB4	3.85699	MTUS1	MTUS1:E004	RBPmap
42	chr8:17645703	uuuuuu	uuuuuu	3.635	0.000139	CPEB4	3.85699	MTUS1	MTUS1:E004	RBPmap
53	chr8:17645714	uuuuuu	uuuuuu	3.635	0.000139	CPEB4	3.85699	MTUS1	MTUS1:E004	RBPmap
54	chr8:17645715	uuuuuu	uuuuuu	3.635	0.000139	CPEB4	3.85699	MTUS1	MTUS1:E004	RBPmap
173	chr8:141001110	gcccc	gcgcc	3.635	0.000139	SRSF5	3.85699	PTK2	PTK2:E139	RBPmap
79	chr7:105117466	hauaua	uauaua	3.635	0.000139	RBMS3	3.85699	SRPK2	SRPK2:E009	RBPmap
754	chr16:1365765	hauaua	cauaua	3.635	0.000139	RBMS3	3.85699	UNKL	UNKL:E006	RBPmap
318	chr6:41935302	grhuuaa	aaauuaa	3.634	0.00014	ZCRB1	3.85387	CCND3	CCND3:E004	RBPmap
186	chr3:48693706	acacrav	acaagac	3.634	0.00014	HNRNPL	3.85387	IP6K2	IP6K2:E019	RBPmap
135	chr3:48695006	gggaggg	gggaugg	3.633	0.00014	HNRNPH2	3.85387	IP6K2	IP6K2:E035	RBPmap
32	chr8:17753748	uucauaa	uucauaa	3.633	0.00014	NOVA1	3.85387	MTUS1	MTUS1:E062	RBPmap
1259	chr8:140669683	uauaga	gauaga	3.634	0.00014	UNK	3.85387	PTK2	PTK2:E019	RBPmap
295	chr14:21263287	aaaaaaa	uaaaaaa	3.631	0.000141	PABPC4	3.85078	HNRNPC	HNRNPC:E056	CisRBP
41	chr3:48694865	ccaaauu	ucaaauc	3.632	0.000141	HNRNPR	3.85078	IP6K2	IP6K2:E034	CisRBP
365	chr8:140658264	aaaaaaa	auaaaaa	3.631	0.000141	PABPC4	3.85078	PTK2	PTK2:E001	CisRBP
24	chr11:14354436	ccaaauu	ccaaacu	3.632	0.000141	HNRNPR	3.85078	RRAS2	RRAS2:E019	CisRBP
64	chr14:21211370	ccacc	ccacc	3.632	0.000141	RBM6	3.85078	HNRNPC	HNRNPC:E018	RBPmap
67	chr14:21211373	ccacc	ccacc	3.632	0.000141	RBM6	3.85078	HNRNPC	HNRNPC:E018	RBPmap
17	chr3:48689554	ugcaca	cgcaca	3.632	0.000141	SNRPA	3.85078	IP6K2	IP6K2:E002	RBPmap
96	chr3:48694967	ggagwd	gggagg	3.632	0.000141	SRSF2	3.85078	IP6K2	IP6K2:E035	RBPmap
41	chr8:17645702	huuuuuk	uuuuuuu	3.632	0.000141	HNRNPCL1	3.85078	MTUS1	MTUS1:E004	RBPmap
53	chr8:17645714	huuuuuk	uuuuuuu	3.632	0.000141	HNRNPCL1	3.85078	MTUS1	MTUS1:E004	RBPmap
73	chr8:140669808	aauaaa	aauaaa	3.632	0.000141	KHDRBS2	3.85078	PTK2	PTK2:E021	RBPmap
29	chr8:140746889	uuuguuu	uuucuuu	3.632	0.000141	BOLL	3.85078	PTK2	PTK2:E066	RBPmap
13	chr8:140764434	uacaca	cacaca	3.632	0.000141	HNRNPL	3.85078	PTK2	PTK2:E080	RBPmap
224	chr7:105143307	uuuguuu	uuuguuu	3.632	0.000141	BOLL	3.85078	SRPK2	SRPK2:E025	RBPmap
6	chr16:1414061	uacaca	aacaca	3.632	0.000141	HNRNPL	3.85078	UNKL	UNKL:E045	RBPmap
55	chr6:41941574	gckgghm	gcugguc	3.63	0.000142	SAMD4A	3.84771	CCND3	CCND3:E027	RBPmap
1387	chr14:21210522	vmahwca	aaauaca	3.63	0.000142	IGF2BP2	3.84771	HNRNPC	HNRNPC:E001	RBPmap
44	chr14:21262812	caacaca	ccacaca	3.629	0.000142	IGF2BP2	3.84771	HNRNPC	HNRNPC:E055	RBPmap
85	chr14:21262853	auaaaav	augaaag	3.629	0.000142	KHDRBS1	3.84771	HNRNPC	HNRNPC:E055	RBPmap
203	chr14:21263195	aucac	aucac	3.629	0.000142	NOVA1	3.84771	HNRNPC	HNRNPC:E056	RBPmap
78	chr3:48693031	uauguuu	uuuguuu	3.629	0.000142	CELF1	3.84771	IP6K2	IP6K2:E005	RBPmap
50	chr8:17643853	acgac	acuac	3.63	0.000142	RBM45	3.84771	MTUS1	MTUS1:E003	RBPmap
124	chr8:17755561	aygacr	caugac	3.629	0.000142	FXR1	3.84771	MTUS1	MTUS1:E064	RBPmap
52	chr17:76067268	guguua	cuguua	3.629	0.000142	BOLL	3.84771	SRP68	SRP68:E035	RBPmap
84	chr16:1363289	aaaaaaa	aaaaaaa	3.627	0.000143	PABPC4	3.84466	UNKL	UNKL:E002	CisRBP
48	chr6:41941814	ssgcgcs	ccccgcc	3.628	0.000143	RC1	3.84466	CCND3	CCND3:E029	RBPmap
268	chr14:21210880	augaa	augaa	3.627	0.000143	RR3	3.84466	HNRNPC	HNRNPC:E007	RBPmap
272	chr14:21210884	augaa	augaa	3.627	0.000143	RR3	3.84466	HNRNPC	HNRNPC:E007	RBPmap
6	chr14:21211312	amahwca	agaaaca	3.627	0.000143	IGF2BP3	3.84466	HNRNPC	HNRNPC:E018	RBPmap
57	chr3:48693236	uguaag	aguaac	3.627	0.000143	SFPQ	3.84466	IP6K2	IP6K2:E012	RBPmap
10	chr3:48694834	amahwca	aaacaca	3.627	0.000143	IGF2BP3	3.84466	IP6K2	IP6K2:E034	RBPmap
10	chr8:17723843	aaaaaar	uaaaaaa	3.627	0.000143	ABPC4	3.84466	MTUS1	MTUS1:E058	RBPmap
205	chr8:140659277	araaaam	acaaaaa	3.627	0.000143	ABPC1	3.84466	PTK2	PTK2:E008	RBPmap
205	chr8:140659277	araaaam	acaaaaa	3.627	0.000143	SART3	3.84466	PTK2	PTK2:E008	RBPmap
275	chr8:140662922	aaaaaar	aaaaaag	3.627	0.000143	ABPC4	3.84466	PTK2	PTK2:E013	RBPmap
33	chr8:140746893	uuuuauu	uuuuuuu	3.628	0.000143	TRNAU1AP	3.84466	PTK2	PTK2:E066	RBPmap
34	chr8:140746894	uuuuauu	uuuuuuu	3.628	0.000143	TRNAU1AP	3.84466	PTK2	PTK2:E066	RBPmap
35	chr8:140746895	uuuuauu	uuuuuuu	3.628	0.000143	TRNAU1AP	3.84466	PTK2	PTK2:E066	RBPmap
27	chr8:140770826	araaaam	agaaaaa	3.627	0.000143	ABPC1	3.84466	PTK2	PTK2:E084	RBPmap
27	chr8:140770826	araaaam	agaaaaa	3.627	0.000143	SART3	3.84466	PTK2	PTK2:E084	RBPmap
572	chr1:52992395	amahwca	acaaaca	3.627	0.000143	IGF2BP3	3.84466	RRAS2	RRAS2:E003	RBPmap
76	chr11:14308282	augaa	augaa	3.627	0.000143	RR3	3.84466	RRAS2	RRAS2:E016	RBPmap
80	chr11:14308286	augaa	augaa	3.627	0.000143	RR3	3.84466	RRAS2	RRAS2:E016	RBPmap
157	chr17:76060547	augaa	augaa	3.627	0.000143	RR3	3.84466	SRP68	SRP68:E024	RBPmap
4	chr17:76060394	agagavm	agagaga	3.627	0.000143	SRSF10	3.84466	SRP68	SRP68:E024	RBPmap
200	chr16:1363405	amayama	acauaca	3.627	0.000143	HNRNPL	3.84466	UNKL	UNKL:E002	RBPmap
84	chr16:1363289	aaaaaar	aaaaaaa	3.627	0.000143	ABPC4	3.84466	UNKL	UNKL:E002	RBPmap
9	chr16:1414064	amahwca	acagaca	3.627	0.000143	IGF2BP3	3.84466	UNKL	UNKL:E045	RBPmap
57	chr3:48693326	aacauca	aauauca	3.625	0.000144	YB-1	3.84164	IP6K2	IP6K2:E013	CisRBP
372	chr8:140658271	agaagac	aaaagaa	3.626	0.000144	PABPN1	3.84164	PTK2	PTK2:E001	CisRBP
206	chr8:140659278	caaaaag	caaaaaa	3.625	0.000144	SYNCRIP	3.84164	PTK2	PTK2:E008	CisRBP
60	chr8:140669795	gaaaacc	gaaaaac	3.625	0.000144	PABPC3	3.84164	PTK2	PTK2:E021	CisRBP
127	chr7:105142463	acuuucu	ucuuucu	3.625	0.000144	ROD1	3.84164	SRPK2	SRPK2:E024	CisRBP
786	chr16:1365797	gaaaacc	aaaaaca	3.625	0.000144	PABPC3	3.84164	UNKL	UNKL:E006	CisRBP
38	chr6:41940623	gggggg	gugggg	3.626	0.000144	HNRNPH2	3.84164	CCND3	CCND3:E023	RBPmap
87	chr6:41941606	gcgcgss	gcccggg	3.626	0.000144	RBM4	3.84164	CCND3	CCND3:E027	RBPmap
1131	chr8:17644934	caaagg	gaaagg	3.625	0.000144	NUPL2	3.84164	MTUS1	MTUS1:E003	RBPmap
1138	chr8:17644941	caaagg	aaaagg	3.625	0.000144	NUPL2	3.84164	MTUS1	MTUS1:E003	RBPmap
47	chr8:17653471	cuuucu	uuuucu	3.625	0.000144	TBP3	3.84164	MTUS1	MTUS1:E015	RBPmap
446	chr8:17754162	uguauug	ugucuug	3.625	0.000144	HNRNPU	3.84164	MTUS1	MTUS1:E062	RBPmap
154	chr1:52992951	uauauag	uguauau	3.625	0.000144	DAZAP1	3.84164	RRAS2	RRAS2:E005	RBPmap
135	chr17:76041113	raaaacm	caaaaca	3.625	0.000144	ABPC3	3.84164	SRP68	SRP68:E009	RBPmap
140	chr17:76041118	raaaacm	caaaaca	3.625	0.000144	ABPC3	3.84164	SRP68	SRP68:E009	RBPmap
44	chr7:105110747	auauau	cuauag	3.625	0.000144	RBMS3	3.84164	SRPK2	SRPK2:E001	RBPmap
770	chr7:105117146	uauauag	cauauag	3.625	0.000144	DAZAP1	3.84164	SRPK2	SRPK2:E005	RBPmap
215	chr7:105143298	uuuuuu	uuuuuu	3.626	0.000144	CPEB4	3.84164	SRPK2	SRPK2:E025	RBPmap
58	chr7:105388848	gcgcgss	acgcggg	3.626	0.000144	RBM4	3.84164	SRPK2	SRPK2:E048	RBPmap
315	chr16:1398619	kgacarg	agacagg	3.625	0.000144	FMR1	3.84164	UNKL	UNKL:E032	RBPmap
266	chr6:41941427	ggggggg	ggagggg	3.624	0.000145	TAF15	3.83863	CCND3	CCND3:E025	RBPmap
101	chr14:21262869	rauaaam	aaaaaaa	3.624	0.000145	KHDRBS2	3.83863	HNRNPC	HNRNPC:E055	RBPmap
115	chr14:21262883	rauaaam	aaaaaaa	3.624	0.000145	KHDRBS2	3.83863	HNRNPC	HNRNPC:E055	RBPmap
116	chr14:21262884	rauaaam	aaaaaaa	3.624	0.000145	KHDRBS2	3.83863	HNRNPC	HNRNPC:E055	RBPmap
14	chr7:105203746	aggag	aggag	3.624	0.000145	SRSF9	3.83863	SRPK2	SRPK2:E040	RBPmap
17	chr7:105203749	aggag	aggag	3.624	0.000145	SRSF9	3.83863	SRPK2	SRPK2:E040	RBPmap
29	chr7:105203761	aggag	aggag	3.624	0.000145	SRSF9	3.83863	SRPK2	SRPK2:E040	RBPmap
20	chr14:21263356	aaaauaa	aaaauag	3.623	0.000146	NUPL2	3.83565	HNRNPC	HNRNPC:E058	RBPmap
40	chr8:17645701	huuuuuk	cuuuuuu	3.623	0.000146	HNRNPCL1	3.83565	MTUS1	MTUS1:E004	RBPmap
52	chr8:17645713	huuuuuk	cuuuuuu	3.623	0.000146	HNRNPCL1	3.83565	MTUS1	MTUS1:E004	RBPmap
84	chr8:17676359	ccccacccc	ccccucgca	3.623	0.000146	CBP2	3.83565	MTUS1	MTUS1:E034	RBPmap
170	chr3:48693690	acacaaa	aaacaaa	3.62	0.000147	ENSG00000215042	3.83268	IP6K2	IP6K2:E019	CisRBP
186	chr3:48693706	acacaaa	acaagac	3.62	0.000147	ENSG00000215042	3.83268	IP6K2	IP6K2:E019	CisRBP
1692	chr8:17645495	acacaca	acaucca	3.62	0.000147	hnRNPLL	3.83268	MTUS1	MTUS1:E003	CisRBP
[truncated: 56,881 more rows]
