# Supplementary material for: The Oncogenic PI3K-Induced Transcriptomic Landscape Reveals Key Functions in Splicing and Gene Expression Regulation
Source: Oxford University Press journal article supplement (doi:10.1158/0008-5472.can-22-0446), 2022-04-20
Supplement: can-22-0446-sst10.xlsx [file can-22-0446-sst10.xlsx]

## Sheet: Table S10 on_pre GDC0077
txid	symbol	baseMean	FDR_significant	stat	pvalue	padj	log2FoldChange	description
AL121845.2	AL121845.2	177.032	TRUE	9.07168	1.17194e-19	4.96445e-15	8.31408	condition on vs pre
AC005077.2	AC005077.2	177.491	TRUE	7.96045	1.71417e-15	3.6307e-11	4.65663	condition on vs pre
CYP2D7	CYP2D7	4400.32	TRUE	7.86854	3.5879e-15	5.06623e-11	3.72302	condition on vs pre
ADORA2A-AS1	ADORA2A-AS1	734.768	TRUE	7.53019	5.06664e-14	5.3657e-10	3.62841	condition on vs pre
DUX4L24	DUX4L24	61.4286	TRUE	-7.39124	1.45471e-13	1.23246e-09	-23.961	condition on vs pre
SDC2	SDC2	5444.18	TRUE	7.33337	2.24444e-13	1.58461e-09	3.47982	condition on vs pre
BCRP2	BCRP2	404.066	TRUE	-7.28661	3.17843e-13	1.92345e-09	-2.09628	condition on vs pre
SLC6A1-AS1	SLC6A1-AS1	54.4548	TRUE	7.22729	4.92741e-13	2.60913e-09	4.34803	condition on vs pre
SLC25A27	SLC25A27	783.728	TRUE	7.19409	6.28767e-13	2.66352e-09	2.58503	condition on vs pre
SNTB1	SNTB1	4205.64	TRUE	7.20225	5.92255e-13	2.66352e-09	3.12354	condition on vs pre
GPR19	GPR19	62.157	TRUE	-7.1548	8.37947e-13	3.22693e-09	-3.13004	condition on vs pre
ACSL1	ACSL1	29294.1	TRUE	7.11945	1.08355e-12	3.82504e-09	3.40887	condition on vs pre
FTOP1	FTOP1	177.136	TRUE	7.07903	1.45167e-12	4.73032e-09	3.24607	condition on vs pre
ITIH4-AS1	ITIH4-AS1	48.7197	TRUE	7.01208	2.34793e-12	7.10435e-09	4.32679	condition on vs pre
AC006254.1	AC006254.1	4992.34	TRUE	6.98047	2.94198e-12	7.78909e-09	3.84661	condition on vs pre
AC009963.2	AC009963.2	85.307	TRUE	6.98476	2.85346e-12	7.78909e-09	4.49686	condition on vs pre
ADORA1	ADORA1	206.232	TRUE	-6.95493	3.52745e-12	7.86455e-09	-2.75171	condition on vs pre
ALOX5AP	ALOX5AP	412.237	TRUE	-6.9604	3.39307e-12	7.86455e-09	-1.70166	condition on vs pre
ASPG	ASPG	3630.85	TRUE	6.95601	3.5004e-12	7.86455e-09	3.55437	condition on vs pre
AC009084.3	AC009084.3	83.7412	TRUE	6.91181	4.78508e-12	9.21368e-09	4.43628	condition on vs pre
CBS	CBS	4056.79	TRUE	6.92501	4.35941e-12	9.21368e-09	2.84668	condition on vs pre
MLXIPL	MLXIPL	6405.81	TRUE	6.91533	4.66783e-12	9.21368e-09	3.10421	condition on vs pre
PLIN1	PLIN1	1107.29	TRUE	6.86349	6.72006e-12	1.23769e-08	3.19211	condition on vs pre
COL18A1	COL18A1	31693.1	TRUE	6.84323	7.74267e-12	1.31195e-08	3.40038	condition on vs pre
SLC22A25	SLC22A25	2117.94	TRUE	6.84526	7.6339e-12	1.31195e-08	4.01123	condition on vs pre
FAM83A	FAM83A	149.192	TRUE	-6.8237	8.87254e-12	1.44558e-08	-3.98151	condition on vs pre
CCNB2	CCNB2	428.52	TRUE	-6.80438	1.01484e-11	1.59221e-08	-2.37971	condition on vs pre
XYLB	XYLB	2184.11	TRUE	6.77534	1.24118e-11	1.87777e-08	2.13785	condition on vs pre
AC012313.9	AC012313.9	131.506	TRUE	6.74905	1.48817e-11	2.10135e-08	3.51038	condition on vs pre
SLC16A13	SLC16A13	428.872	TRUE	6.74953	1.48329e-11	2.10135e-08	2.53421	condition on vs pre
LCAT	LCAT	1872.19	TRUE	6.72072	1.80835e-11	2.39385e-08	3.21865	condition on vs pre
SARDH	SARDH	5702.54	TRUE	6.72359	1.77299e-11	2.39385e-08	3.36125	condition on vs pre
PLGLB1	PLGLB1	2064.56	TRUE	6.66679	2.61454e-11	3.3562e-08	3.10475	condition on vs pre
LINC01093	LINC01093	584.743	TRUE	6.65362	2.85975e-11	3.563e-08	5.42766	condition on vs pre
MST1P2	MST1P2	2275.41	TRUE	6.63459	3.25403e-11	3.9384e-08	4.04044	condition on vs pre
CROCCP2	CROCCP2	2597.21	TRUE	6.62349	3.50824e-11	4.12813e-08	1.67818	condition on vs pre
STRA6	STRA6	327.587	TRUE	-6.57927	4.72768e-11	5.41268e-08	-3.97728	condition on vs pre
ABCC2	ABCC2	6227.82	TRUE	6.57428	4.88878e-11	5.44984e-08	3.91063	condition on vs pre
GHR	GHR	7258.63	TRUE	6.54294	6.03192e-11	6.55175e-08	3.12828	condition on vs pre
OAF	OAF	4332.76	TRUE	6.53403	6.40232e-11	6.78022e-08	3.26033	condition on vs pre
CFAP45	CFAP45	167.592	TRUE	-6.51867	7.09348e-11	7.32895e-08	-2.44536	condition on vs pre
ANPEP	ANPEP	10623.5	TRUE	6.5126	7.38614e-11	7.44963e-08	4.00712	condition on vs pre
FAM81A	FAM81A	84.7026	TRUE	-6.5088	7.57522e-11	7.46265e-08	-2.42271	condition on vs pre
GLYCTK	GLYCTK	7504.68	TRUE	6.49598	8.24922e-11	7.94194e-08	4.12615	condition on vs pre
AC080128.1	AC080128.1	1498.79	TRUE	6.46857	9.89336e-11	8.91686e-08	4.91652	condition on vs pre
DMGDH	DMGDH	4699.52	TRUE	6.47026	9.78363e-11	8.91686e-08	4.24373	condition on vs pre
LIPG	LIPG	9049.47	TRUE	6.47007	9.79558e-11	8.91686e-08	3.25976	condition on vs pre
AL022314.1	AL022314.1	24.2184	TRUE	6.458	1.06095e-10	9.36309e-08	3.5066	condition on vs pre
AP001880.2	AP001880.2	302.976	TRUE	6.4493	1.12371e-10	9.52028e-08	4.72305	condition on vs pre
IGF2	IGF2	17026.4	TRUE	6.45164	1.10648e-10	9.52028e-08	4.62869	condition on vs pre
POR	POR	6571.18	TRUE	6.43556	1.23019e-10	1.0218e-07	2.25345	condition on vs pre
IL6R	IL6R	5505.49	TRUE	6.42504	1.31833e-10	1.07396e-07	2.96992	condition on vs pre
SGK2	SGK2	1589.55	TRUE	6.41452	1.41264e-10	1.12907e-07	3.43641	condition on vs pre
SLC17A9	SLC17A9	2642.48	TRUE	6.40754	1.47888e-10	1.16012e-07	3.59	condition on vs pre
DBH-AS1	DBH-AS1	828.337	TRUE	6.40404	1.5132e-10	1.16547e-07	3.42066	condition on vs pre
CNGA1	CNGA1	378.61	TRUE	6.39041	1.65436e-10	1.25144e-07	2.60743	condition on vs pre
CCDC33	CCDC33	68.992	TRUE	-6.36876	1.90565e-10	1.41623e-07	-4.45469	condition on vs pre
CD302	CD302	5556.58	TRUE	6.34465	2.22934e-10	1.62822e-07	2.59053	condition on vs pre
TUBBP10	TUBBP10	295.176	TRUE	6.3382	2.3246e-10	1.66902e-07	3.57299	condition on vs pre
EXOC3L4	EXOC3L4	1108.1	TRUE	6.28742	3.22791e-10	2.27896e-07	3.37549	condition on vs pre
C2orf72	C2orf72	4186.56	TRUE	6.26038	3.84031e-10	2.58221e-07	2.87098	condition on vs pre
MST1	MST1	9793.5	TRUE	6.26092	3.82708e-10	2.58221e-07	3.27775	condition on vs pre
PIFO	PIFO	179.718	TRUE	-6.26471	3.7351e-10	2.58221e-07	-3.22523	condition on vs pre
WDR81	WDR81	2644.19	TRUE	6.25629	3.94235e-10	2.6094e-07	1.74315	condition on vs pre
PNPLA3	PNPLA3	1976.7	TRUE	6.25231	4.04436e-10	2.63574e-07	3.13698	condition on vs pre
ACSL5	ACSL5	3872	TRUE	6.23941	4.39214e-10	2.81902e-07	2.47559	condition on vs pre
SKA3	SKA3	266.369	TRUE	-6.23218	4.5998e-10	2.90824e-07	-2.58758	condition on vs pre
ADGRA3	ADGRA3	5812.82	TRUE	6.21969	4.98139e-10	2.93079e-07	1.85948	condition on vs pre
ADGRG7	ADGRG7	589.332	TRUE	6.22024	4.96382e-10	2.93079e-07	4.57845	condition on vs pre
CAPN3	CAPN3	685.811	TRUE	6.22375	4.85418e-10	2.93079e-07	2.54279	condition on vs pre
FYTTD1P1	FYTTD1P1	356.087	TRUE	6.22339	4.8653e-10	2.93079e-07	4.78311	condition on vs pre
UMODL1	UMODL1	103.293	TRUE	-6.22733	4.74458e-10	2.93079e-07	-2.61129	condition on vs pre
C5orf46	C5orf46	44.2699	TRUE	-6.2165	5.0838e-10	2.95007e-07	-4.11577	condition on vs pre
BHMT2	BHMT2	9771.15	TRUE	6.20501	5.46927e-10	3.13086e-07	3.98949	condition on vs pre
PLGLA	PLGLA	739.572	TRUE	6.18774	6.10321e-10	3.44717e-07	4.58128	condition on vs pre
LIPC-AS1	LIPC-AS1	253.836	TRUE	6.17483	6.62353e-10	3.69184e-07	3.88523	condition on vs pre
AGXT	AGXT	31531.9	TRUE	6.17023	6.81921e-10	3.75154e-07	5.11918	condition on vs pre
PBK	PBK	184.869	TRUE	-6.16529	7.03521e-10	3.82075e-07	-2.62062	condition on vs pre
MPDZ	MPDZ	5882.49	TRUE	6.15558	7.4803e-10	4.01105e-07	1.94298	condition on vs pre
PTTG1	PTTG1	744.226	TRUE	-6.15329	7.58908e-10	4.01851e-07	-3.15017	condition on vs pre
BACE1	BACE1	1964.52	TRUE	6.14754	7.8694e-10	4.1155e-07	1.86283	condition on vs pre
ARL4AP3	ARL4AP3	139.776	TRUE	6.14306	8.09445e-10	4.18157e-07	4.88846	condition on vs pre
AC009879.3	AC009879.3	365.515	TRUE	6.12752	8.92588e-10	4.55553e-07	4.11693	condition on vs pre
PROZ	PROZ	938.07	TRUE	6.11663	9.55748e-10	4.78748e-07	3.36494	condition on vs pre
SLC51A	SLC51A	1243.21	TRUE	6.11582	9.60639e-10	4.78748e-07	2.6418	condition on vs pre
C2	C2	12612.9	TRUE	6.09857	1.07019e-09	5.21082e-07	3.29635	condition on vs pre
H19	H19	22437.6	TRUE	6.09989	1.06142e-09	5.21082e-07	5.01674	condition on vs pre
CENPA	CENPA	137.696	TRUE	-6.09322	1.10664e-09	5.32709e-07	-3.0997	condition on vs pre
GPT	GPT	2794.96	TRUE	6.08153	1.19044e-09	5.6661e-07	3.27726	condition on vs pre
CDC25C	CDC25C	185.894	TRUE	-6.07222	1.26155e-09	5.93782e-07	-2.60746	condition on vs pre
AL512662.2	AL512662.2	53.1271	TRUE	6.06747	1.2994e-09	6.04877e-07	3.401	condition on vs pre
SLC25A18	SLC25A18	1376.64	TRUE	6.06137	1.34968e-09	6.21453e-07	3.29271	condition on vs pre
DIO1	DIO1	1899.99	TRUE	6.05647	1.39145e-09	6.33796e-07	2.84878	condition on vs pre
ABCB11	ABCB11	7159.93	TRUE	6.05289	1.42267e-09	6.41126e-07	2.78521	condition on vs pre
AC021146.9	AC021146.9	32.9894	TRUE	6.04716	1.4742e-09	6.57352e-07	5.74191	condition on vs pre
DSPP	DSPP	46.4247	TRUE	-6.03375	1.60194e-09	7.06871e-07	-3.40728	condition on vs pre
AC114812.4	AC114812.4	54.8106	TRUE	6.0262	1.67857e-09	7.33052e-07	4.14209	condition on vs pre
CYP3A5	CYP3A5	24475	TRUE	6.01989	1.74539e-09	7.46833e-07	2.84365	condition on vs pre
HMMR	HMMR	347.682	TRUE	-6.02108	1.73254e-09	7.46833e-07	-2.33496	condition on vs pre
ABCA5	ABCA5	2790.29	TRUE	6.0114	1.83926e-09	7.69574e-07	2.15837	condition on vs pre
AC013444.2	AC013444.2	39.8921	TRUE	6.00905	1.8661e-09	7.69574e-07	3.34791	condition on vs pre
CYP2D6	CYP2D6	5116.11	TRUE	6.01023	1.85265e-09	7.69574e-07	3.93215	condition on vs pre
EHBP1	EHBP1	3990.99	TRUE	6.00861	1.8712e-09	7.69574e-07	2.14117	condition on vs pre
NAGS	NAGS	1068.44	TRUE	6.00545	1.90808e-09	7.77193e-07	3.57703	condition on vs pre
AL391117.1	AL391117.1	140.135	TRUE	5.98962	2.10332e-09	8.4856e-07	3.36983	condition on vs pre
NADK2-AS1	NADK2-AS1	145.268	TRUE	5.98722	2.13457e-09	8.53044e-07	2.24165	condition on vs pre
UPB1	UPB1	6761.8	TRUE	5.98021	2.22847e-09	8.82244e-07	4.09864	condition on vs pre
CES2	CES2	10820.3	TRUE	5.97517	2.29844e-09	9.00908e-07	3.47108	condition on vs pre
GPR17	GPR17	163	TRUE	5.97378	2.31815e-09	9.00908e-07	2.29785	condition on vs pre
MTND4P20	MTND4P20	2267.85	TRUE	5.97053	2.36491e-09	9.10728e-07	5.1823	condition on vs pre
ACAA1	ACAA1	8041.42	TRUE	5.9624	2.48561e-09	9.48584e-07	2.71893	condition on vs pre
CCT8P1	CCT8P1	627.232	TRUE	5.95878	2.54132e-09	9.61188e-07	2.40519	condition on vs pre
TPT1P12	TPT1P12	59.0549	TRUE	5.95331	2.6277e-09	9.85061e-07	3.74525	condition on vs pre
CCNB1	CCNB1	1415.74	TRUE	-5.94905	2.69699e-09	9.93453e-07	-2.51616	condition on vs pre
SLC10A1	SLC10A1	4836.05	TRUE	5.94984	2.68406e-09	9.93453e-07	3.89918	condition on vs pre
NUGGC	NUGGC	1841.46	TRUE	5.94604	2.74713e-09	1.0032e-06	2.45484	condition on vs pre
TFDP3	TFDP3	86.2009	TRUE	-5.9417	2.82074e-09	1.02127e-06	-3.44669	condition on vs pre
AKR1C8P	AKR1C8P	1504.22	TRUE	5.93111	3.00889e-09	1.0753e-06	5.04655	condition on vs pre
HAAO	HAAO	2842.87	TRUE	5.93047	3.02072e-09	1.0753e-06	3.36478	condition on vs pre
AC012651.1	AC012651.1	628.301	TRUE	5.92666	3.0916e-09	1.09136e-06	2.57499	condition on vs pre
SLC13A5	SLC13A5	10546.9	TRUE	5.925	3.12289e-09	1.0933e-06	3.37851	condition on vs pre
AC008132.1	AC008132.1	270.346	TRUE	-5.92236	3.17362e-09	1.10195e-06	-2.31979	condition on vs pre
NHSL1	NHSL1	3001.16	TRUE	5.91966	3.22607e-09	1.11105e-06	2.14969	condition on vs pre
FAIM2	FAIM2	230.152	TRUE	-5.91592	3.30018e-09	1.12741e-06	-3.08578	condition on vs pre
DMBX1	DMBX1	64.3107	TRUE	-5.91235	3.37263e-09	1.14294e-06	-2.48716	condition on vs pre
LINC01147	LINC01147	34.7137	TRUE	5.89801	3.6791e-09	1.23691e-06	4.43484	condition on vs pre
C3orf14	C3orf14	742.911	TRUE	-5.8963	3.71749e-09	1.23997e-06	-2.4717	condition on vs pre
PFKFB1	PFKFB1	941.065	TRUE	5.89051	3.85e-09	1.27414e-06	4.07323	condition on vs pre
TPRG1-AS1	TPRG1-AS1	174.968	TRUE	5.8884	3.89952e-09	1.28052e-06	2.83934	condition on vs pre
OXER1	OXER1	509.948	TRUE	5.88482	3.98478e-09	1.29846e-06	2.3548	condition on vs pre
ARTN	ARTN	173.715	TRUE	-5.88181	4.05808e-09	1.30749e-06	-2.20449	condition on vs pre
SHANK1	SHANK1	98.2476	TRUE	-5.88115	4.07422e-09	1.30749e-06	-2.90067	condition on vs pre
PSAT1	PSAT1	1849.45	TRUE	5.87697	4.1784e-09	1.33084e-06	3.40282	condition on vs pre
PLIN4	PLIN4	1920.37	TRUE	5.87517	4.22416e-09	1.33537e-06	3.01919	condition on vs pre
SLC10A5	SLC10A5	542.005	TRUE	5.86709	4.43516e-09	1.39169e-06	2.27773	condition on vs pre
PBLD	PBLD	6221.74	TRUE	5.86146	4.58828e-09	1.42915e-06	3.23831	condition on vs pre
AL445183.3	AL445183.3	68.9752	TRUE	5.84769	4.98452e-09	1.54123e-06	2.90995	condition on vs pre
AADAT	AADAT	719.593	TRUE	5.83256	5.45836e-09	1.67552e-06	3.4308	condition on vs pre
HIST2H3C	HIST2H3C	14709.4	TRUE	-5.82808	5.60694e-09	1.70818e-06	-3.17816	condition on vs pre
TMEM61	TMEM61	55.5381	TRUE	-5.82694	5.64541e-09	1.70818e-06	-2.6895	condition on vs pre
RDH16	RDH16	9625.88	TRUE	5.8228	5.78711e-09	1.73864e-06	3.61849	condition on vs pre
CCL16	CCL16	1161.51	TRUE	5.82144	5.83415e-09	1.74043e-06	2.96587	condition on vs pre
TUBE1	TUBE1	1467.78	TRUE	5.81985	5.88988e-09	1.74476e-06	1.66633	condition on vs pre
ATP2B2	ATP2B2	2721.44	TRUE	5.80785	6.32804e-09	1.8409e-06	4.4976	condition on vs pre
CBSL	CBSL	3388.46	TRUE	5.80793	6.3251e-09	1.8409e-06	3.83279	condition on vs pre
CYP2C18	CYP2C18	2466.31	TRUE	5.80741	6.34479e-09	1.8409e-06	4.54424	condition on vs pre
CDKN3	CDKN3	262.246	TRUE	-5.79313	6.90856e-09	1.99084e-06	-2.77914	condition on vs pre
SORD2P	SORD2P	1332.93	TRUE	5.79193	6.95836e-09	1.99164e-06	3.00714	condition on vs pre
AC007493.1	AC007493.1	81.3577	TRUE	-5.78693	7.16829e-09	2.03796e-06	-3.85664	condition on vs pre
CLEC4M	CLEC4M	1786.16	TRUE	5.77416	7.73371e-09	2.18405e-06	4.1778	condition on vs pre
SLC35D1	SLC35D1	4418.89	TRUE	5.76842	8.00168e-09	2.24476e-06	2.13182	condition on vs pre
LDHD	LDHD	2239.54	TRUE	5.75716	8.55389e-09	2.38389e-06	3.08062	condition on vs pre
HPX	HPX	58885.1	TRUE	5.75337	8.74816e-09	2.4221e-06	4.25562	condition on vs pre
ADRA1A	ADRA1A	5175.06	TRUE	5.74748	9.05856e-09	2.49175e-06	3.90041	condition on vs pre
CFI	CFI	8683.43	TRUE	5.74159	9.37943e-09	2.53695e-06	3.69387	condition on vs pre
KHK	KHK	4400.78	TRUE	5.74161	9.37826e-09	2.53695e-06	4.02864	condition on vs pre
MOGAT2	MOGAT2	2506.51	TRUE	5.74117	9.40255e-09	2.53695e-06	3.57498	condition on vs pre
AKR7L	AKR7L	847.704	TRUE	5.7289	1.01082e-08	2.68008e-06	2.87311	condition on vs pre
ATP8A2	ATP8A2	394.387	TRUE	-5.7296	1.00671e-08	2.68008e-06	-5.14217	condition on vs pre
KPNA2	KPNA2	1757.49	TRUE	-5.72862	1.01252e-08	2.68008e-06	-1.88423	condition on vs pre
PRKAB2	PRKAB2	2873.32	TRUE	5.7276	1.01861e-08	2.68008e-06	2.07258	condition on vs pre
SERPIND1	SERPIND1	12557.2	TRUE	5.72311	1.0459e-08	2.73236e-06	4.38306	condition on vs pre
TDO2	TDO2	8132.25	TRUE	5.72223	1.05138e-08	2.73236e-06	4.62421	condition on vs pre
CLU	CLU	64334.2	TRUE	5.71847	1.0749e-08	2.77646e-06	3.49991	condition on vs pre
GCH1	GCH1	1390.6	TRUE	5.71538	1.09456e-08	2.81011e-06	2.27462	condition on vs pre
ACSM2A	ACSM2A	8765.95	TRUE	5.71145	1.12018e-08	2.84144e-06	4.05576	condition on vs pre
IGFALS	IGFALS	4126.72	TRUE	5.71193	1.117e-08	2.84144e-06	3.87811	condition on vs pre
LINC02499	LINC02499	1135.87	TRUE	5.70243	1.1811e-08	2.97813e-06	5.36231	condition on vs pre
CYP4A22	CYP4A22	4084.37	TRUE	5.69972	1.20002e-08	2.99197e-06	3.62942	condition on vs pre
ECHDC2	ECHDC2	12471.1	TRUE	5.69909	1.2045e-08	2.99197e-06	1.9982	condition on vs pre
ERRFI1	ERRFI1	10775.7	TRUE	5.69862	1.20778e-08	2.99197e-06	2.62056	condition on vs pre
HAL	HAL	3094.5	TRUE	5.69499	1.23377e-08	3.03858e-06	4.57735	condition on vs pre
BUB1	BUB1	685.171	TRUE	-5.6846	1.31116e-08	3.21052e-06	-2.49705	condition on vs pre
MIR122HG	MIR122HG	7743.74	TRUE	5.67792	1.3634e-08	3.31925e-06	4.34977	condition on vs pre
AC011498.4	AC011498.4	554.705	TRUE	5.66838	1.44152e-08	3.45334e-06	1.9174	condition on vs pre
ALDH2	ALDH2	30652.9	TRUE	5.66821	1.44293e-08	3.45334e-06	3.37445	condition on vs pre
AP000355.1	AP000355.1	108.184	TRUE	5.66997	1.4282e-08	3.45334e-06	4.15123	condition on vs pre
SF3A3P1	SF3A3P1	154.656	TRUE	5.66643	1.45803e-08	3.46986e-06	1.47806	condition on vs pre
CDK1	CDK1	662.054	TRUE	-5.66509	1.46948e-08	3.47757e-06	-2.49149	condition on vs pre
ETFDH	ETFDH	3949.49	TRUE	5.65695	1.54083e-08	3.58721e-06	2.40864	condition on vs pre
METTL7A	METTL7A	14458.5	TRUE	5.65597	1.54968e-08	3.58721e-06	3.33951	condition on vs pre
RASGEF1B	RASGEF1B	2205.54	TRUE	5.65788	1.53257e-08	3.58721e-06	1.69347	condition on vs pre
SIK2	SIK2	6565.76	TRUE	5.65672	1.54289e-08	3.58721e-06	1.75965	condition on vs pre
SLC37A4	SLC37A4	4746.7	TRUE	5.65311	1.5757e-08	3.62761e-06	2.7786	condition on vs pre
STEAP3	STEAP3	7653.67	TRUE	5.64785	1.62467e-08	3.72014e-06	2.65727	condition on vs pre
ALDH8A1	ALDH8A1	4398.37	TRUE	5.64396	1.66178e-08	3.76837e-06	3.37665	condition on vs pre
CDCA3	CDCA3	417.35	TRUE	-5.64371	1.66425e-08	3.76837e-06	-2.12483	condition on vs pre
MYO1B	MYO1B	11759.8	TRUE	5.64287	1.67242e-08	3.76837e-06	2.73892	condition on vs pre
CYP4A11	CYP4A11	14173.1	TRUE	5.64121	1.68862e-08	3.78475e-06	4.41315	condition on vs pre
AP006248.3	AP006248.3	81.6639	TRUE	5.63896	1.71084e-08	3.81436e-06	4.16167	condition on vs pre
PAFAH1B3	PAFAH1B3	1710.59	TRUE	-5.63657	1.7347e-08	3.82727e-06	-2.10404	condition on vs pre
TTPA	TTPA	2274.32	TRUE	5.63679	1.73251e-08	3.82727e-06	4.00339	condition on vs pre
ACAD11	ACAD11	3958.99	TRUE	5.63002	1.80191e-08	3.93458e-06	2.36184	condition on vs pre
GCKR	GCKR	2398.41	TRUE	5.63054	1.79645e-08	3.93458e-06	4.61056	condition on vs pre
RXRA	RXRA	10184.1	TRUE	5.62889	1.81371e-08	3.94002e-06	2.18212	condition on vs pre
ALDH5A1	ALDH5A1	4192.93	TRUE	5.62514	1.85354e-08	3.96555e-06	2.52196	condition on vs pre
SLC22A1	SLC22A1	14155.6	TRUE	5.62592	1.84523e-08	3.96555e-06	4.89016	condition on vs pre
TPX2	TPX2	1249.31	TRUE	-5.6255	1.84968e-08	3.96555e-06	-1.63831	condition on vs pre
BMS1P21	BMS1P21	50.9151	TRUE	5.62422	1.86346e-08	3.96673e-06	3.75244	condition on vs pre
AC084871.2	AC084871.2	80.1519	TRUE	5.61969	1.91295e-08	3.99266e-06	2.95073	condition on vs pre
FAM20A	FAM20A	3041.76	TRUE	5.62183	1.88946e-08	3.99266e-06	2.90719	condition on vs pre
GLDC	GLDC	2746.87	TRUE	5.61881	1.92277e-08	3.99266e-06	3.26769	condition on vs pre
HSD17B6	HSD17B6	9883.86	TRUE	5.61884	1.92247e-08	3.99266e-06	4.53399	condition on vs pre
MAF	MAF	3477.89	TRUE	5.61984	1.91138e-08	3.99266e-06	2.20534	condition on vs pre
ABCC8	ABCC8	656.219	TRUE	-5.61497	1.96601e-08	4.02329e-06	-2.26994	condition on vs pre
CYP8B1	CYP8B1	10362.1	TRUE	5.61544	1.96063e-08	4.02329e-06	4.78	condition on vs pre
MLYCD	MLYCD	2660.85	TRUE	5.615	1.96557e-08	4.02329e-06	1.86412	condition on vs pre
AC007319.1	AC007319.1	203.306	TRUE	5.60954	2.02865e-08	4.11176e-06	3.38174	condition on vs pre
NDUFA6-DT	NDUFA6-DT	1838.65	TRUE	5.61031	2.01966e-08	4.11176e-06	2.18996	condition on vs pre
CYP2C9	CYP2C9	28821.6	TRUE	5.60766	2.05083e-08	4.13691e-06	4.86159	condition on vs pre
ACADS	ACADS	3736.82	TRUE	5.60505	2.0819e-08	4.17969e-06	3.12759	condition on vs pre
ABTB2	ABTB2	1118.3	TRUE	5.59965	2.14784e-08	4.28166e-06	2.27755	condition on vs pre
H2AFX	H2AFX	807.638	TRUE	-5.59843	2.16301e-08	4.28166e-06	-1.72239	condition on vs pre
SLC43A1	SLC43A1	2159.98	TRUE	5.59884	2.15793e-08	4.28166e-06	3.13946	condition on vs pre
SERPINA9	SERPINA9	112.891	TRUE	-5.59312	2.23031e-08	4.37399e-06	-2.9647	condition on vs pre
SLC46A3	SLC46A3	1909.09	TRUE	5.5934	2.22664e-08	4.37399e-06	2.0618	condition on vs pre
PLK1	PLK1	648.735	TRUE	-5.58888	2.28538e-08	4.46133e-06	-2.12095	condition on vs pre
HIST1H2BH	HIST1H2BH	4835.2	TRUE	-5.58797	2.29739e-08	4.46422e-06	-2.75158	condition on vs pre
CDC25A	CDC25A	228.44	TRUE	-5.58431	2.34624e-08	4.53831e-06	-2.18568	condition on vs pre
DNAJC25	DNAJC25	920.884	TRUE	5.57895	2.41968e-08	4.65909e-06	2.21121	condition on vs pre
AC019181.1	AC019181.1	60.7624	TRUE	5.57604	2.46055e-08	4.71636e-06	2.17953	condition on vs pre
ACACB	ACACB	9117.49	TRUE	5.57038	2.54178e-08	4.82835e-06	2.46656	condition on vs pre
APOE	APOE	89873.2	TRUE	5.57052	2.53982e-08	4.82835e-06	2.93052	condition on vs pre
TANGO6	TANGO6	1254.65	TRUE	5.56826	2.57289e-08	4.86563e-06	1.89028	condition on vs pre
EGR3	EGR3	145.007	TRUE	-5.56253	2.65891e-08	5.00596e-06	-2.09503	condition on vs pre
AL133215.2	AL133215.2	49.0392	TRUE	-5.56115	2.68008e-08	5.02349e-06	-2.35439	condition on vs pre
FZD5	FZD5	2797.16	TRUE	5.56032	2.69288e-08	5.02525e-06	2.94087	condition on vs pre
NCAPH	NCAPH	428.419	TRUE	-5.55924	2.70951e-08	5.0341e-06	-2.37403	condition on vs pre
AL359915.1	AL359915.1	82.4283	TRUE	5.55839	2.7228e-08	5.0367e-06	3.48529	condition on vs pre
FRRS1	FRRS1	1609.67	TRUE	5.55655	2.75163e-08	5.06791e-06	2.13639	condition on vs pre
AC091230.1	AC091230.1	67.5796	TRUE	-5.55516	2.77361e-08	5.08627e-06	-2.6357	condition on vs pre
AC104958.1	AC104958.1	256.001	TRUE	5.55437	2.78607e-08	5.08711e-06	3.00607	condition on vs pre
AC114812.1	AC114812.1	74.8221	TRUE	5.54657	2.91329e-08	5.27392e-06	4.07983	condition on vs pre
AP000962.2	AP000962.2	129.036	TRUE	5.54669	2.9113e-08	5.27392e-06	1.69446	condition on vs pre
GALT	GALT	2483.42	TRUE	5.53901	3.04182e-08	5.48317e-06	2.70722	condition on vs pre
RNF128	RNF128	1907.06	TRUE	5.53729	3.0718e-08	5.51376e-06	2.89216	condition on vs pre
RN7SKP296	RN7SKP296	35.3649	TRUE	5.53643	3.08692e-08	5.5175e-06	3.17471	condition on vs pre
MST1L	MST1L	2218.01	TRUE	5.53305	3.14714e-08	5.60152e-06	3.19506	condition on vs pre
ATF7IP2	ATF7IP2	1824.19	TRUE	5.53231	3.16042e-08	5.60162e-06	1.60711	condition on vs pre
AC005224.4	AC005224.4	169.444	TRUE	5.52923	3.21637e-08	5.67561e-06	2.91803	condition on vs pre
AC254562.2	AC254562.2	191.81	TRUE	5.52725	3.2528e-08	5.67561e-06	2.75201	condition on vs pre
ATF5	ATF5	6343.74	TRUE	5.5271	3.25576e-08	5.67561e-06	3.73235	condition on vs pre
OSGIN1	OSGIN1	1402.93	TRUE	5.52815	3.23622e-08	5.67561e-06	3.19943	condition on vs pre
TTC38	TTC38	4555.53	TRUE	5.52454	3.30349e-08	5.73521e-06	2.70031	condition on vs pre
HPN-AS1	HPN-AS1	168.562	TRUE	5.5229	3.33446e-08	5.76534e-06	2.25834	condition on vs pre
CHDH	CHDH	5746.17	TRUE	5.52139	3.36336e-08	5.79168e-06	1.62646	condition on vs pre
MARCH10	MARCH10	57.6132	TRUE	-5.5164	3.46006e-08	5.91632e-06	-3.56902	condition on vs pre
TRPM8	TRPM8	1227.16	TRUE	5.51622	3.46368e-08	5.91632e-06	3.12504	condition on vs pre
LRRC3	LRRC3	1709.5	TRUE	5.51094	3.56915e-08	6.072e-06	2.62834	condition on vs pre
LINC01146	LINC01146	1230.48	TRUE	5.50891	3.61053e-08	6.11783e-06	4.30441	condition on vs pre
AMN	AMN	1925.28	TRUE	5.50554	3.68045e-08	6.1868e-06	3.93308	condition on vs pre
FBXO31	FBXO31	2192.99	TRUE	5.50621	3.66638e-08	6.1868e-06	2.0297	condition on vs pre
PQLC1	PQLC1	3056.18	TRUE	5.50308	3.73221e-08	6.24185e-06	2.33059	condition on vs pre
SLC27A2	SLC27A2	4066.2	TRUE	5.50258	3.74266e-08	6.24185e-06	3.09296	condition on vs pre
AL663070.1	AL663070.1	234.595	TRUE	5.49653	3.87338e-08	6.43451e-06	3.19643	condition on vs pre
RPL7L1P3	RPL7L1P3	94.5471	TRUE	5.48657	4.09821e-08	6.78141e-06	2.2473	condition on vs pre
GIHCG	GIHCG	153.829	TRUE	-5.48087	4.23249e-08	6.97637e-06	-2.10612	condition on vs pre
MAGOH2P	MAGOH2P	57.6107	TRUE	5.47858	4.28757e-08	7.03976e-06	2.60205	condition on vs pre
GPER1	GPER1	688.418	TRUE	5.47699	4.32633e-08	7.07597e-06	1.92635	condition on vs pre
AL121845.3	AL121845.3	1251.59	TRUE	5.47269	4.4326e-08	7.2219e-06	2.39729	condition on vs pre
SERPINA10	SERPINA10	9643.56	TRUE	5.46899	4.52616e-08	7.34608e-06	4.09919	condition on vs pre
AGMAT	AGMAT	3534.46	TRUE	5.46496	4.63003e-08	7.48598e-06	2.95116	condition on vs pre
KDM8	KDM8	1787.98	TRUE	5.4639	4.65798e-08	7.50254e-06	2.96058	condition on vs pre
HIST1H1D	HIST1H1D	5825.67	TRUE	-5.45963	4.77141e-08	7.59855e-06	-2.53113	condition on vs pre
KLKB1	KLKB1	3870.88	TRUE	5.45989	4.76416e-08	7.59855e-06	4.40365	condition on vs pre
SLC39A14	SLC39A14	18623.3	TRUE	5.46031	4.75296e-08	7.59855e-06	3.68754	condition on vs pre
AMT	AMT	1550.26	TRUE	5.45759	4.82635e-08	7.65726e-06	1.87513	condition on vs pre
CENPM	CENPM	297.863	TRUE	-5.45589	4.87283e-08	7.70216e-06	-2.28364	condition on vs pre
FBXO17	FBXO17	1262.68	TRUE	5.45409	4.92252e-08	7.75179e-06	2.32258	condition on vs pre
SLC19A3	SLC19A3	1324.4	TRUE	5.45256	4.96504e-08	7.78978e-06	2.73941	condition on vs pre
FTCD-AS1	FTCD-AS1	77.5093	TRUE	5.45063	5.0191e-08	7.84553e-06	4.69839	condition on vs pre
HEPACAM	HEPACAM	637.49	TRUE	5.44396	5.21076e-08	8.05595e-06	5.00605	condition on vs pre
SERPINF1	SERPINF1	10866.9	TRUE	5.44404	5.20862e-08	8.05595e-06	3.06403	condition on vs pre
SPOCK1	SPOCK1	343.159	TRUE	-5.44472	5.18867e-08	8.05595e-06	-4.13341	condition on vs pre
AGT	AGT	25807.5	TRUE	5.44244	5.25563e-08	8.09577e-06	4.00803	condition on vs pre
CDH2	CDH2	2353.18	TRUE	5.44138	5.28701e-08	8.11461e-06	2.75013	condition on vs pre
MELK	MELK	307.307	TRUE	-5.4397	5.33693e-08	8.16165e-06	-2.19296	condition on vs pre
C16orf70	C16orf70	1752.99	TRUE	5.43622	5.4422e-08	8.2927e-06	1.76128	condition on vs pre
SLC38A3	SLC38A3	6052.23	TRUE	5.426	5.76294e-08	8.74996e-06	4.12971	condition on vs pre
SHMT1	SHMT1	8612.72	TRUE	5.42534	5.78431e-08	8.75104e-06	2.9665	condition on vs pre
AP006248.4	AP006248.4	151.562	TRUE	5.41857	6.00778e-08	9.02467e-06	2.72192	condition on vs pre
NAT2	NAT2	630.041	TRUE	5.41862	6.00609e-08	9.02467e-06	4.1664	condition on vs pre
SLC38A4	SLC38A4	13276	TRUE	5.41396	6.16461e-08	9.22753e-06	4.59176	condition on vs pre
NR1I2	NR1I2	3771.49	TRUE	5.40511	6.47691e-08	9.66086e-06	4.62931	condition on vs pre
AL157400.5	AL157400.5	178.678	TRUE	5.40175	6.59954e-08	9.80924e-06	2.70822	condition on vs pre
CCNA2	CCNA2	527.301	TRUE	-5.39885	6.70699e-08	9.81444e-06	-2.03715	condition on vs pre
CYP1A2	CYP1A2	11514.4	TRUE	5.39918	6.69467e-08	9.81444e-06	4.423	condition on vs pre
DRP2	DRP2	154.16	TRUE	-5.39853	6.71889e-08	9.81444e-06	-3.11602	condition on vs pre
TTPAL	TTPAL	3372.44	TRUE	5.39994	6.66648e-08	9.81444e-06	1.53026	condition on vs pre
UGT1A4	UGT1A4	4565.58	TRUE	5.40079	6.6349e-08	9.81444e-06	4.72602	condition on vs pre
NCAPGP1	NCAPGP1	111.806	TRUE	5.39568	6.82634e-08	9.93713e-06	2.84931	condition on vs pre
ADAMTS13	ADAMTS13	990.397	TRUE	5.38824	7.11494e-08	1.03218e-05	2.2373	condition on vs pre
HIST1H3F	HIST1H3F	4330.19	TRUE	-5.3791	7.48588e-08	1.08228e-05	-2.92956	condition on vs pre
PROC	PROC	6103.22	TRUE	5.3782	7.52347e-08	1.08402e-05	4.38576	condition on vs pre
GSTA7P	GSTA7P	44.2567	TRUE	5.37422	7.69165e-08	1.1045e-05	5.3963	condition on vs pre
EHHADH	EHHADH	8324.22	TRUE	5.37285	7.75008e-08	1.10912e-05	3.55042	condition on vs pre
HLF	HLF	2012.17	TRUE	5.37178	7.79615e-08	1.11196e-05	3.60375	condition on vs pre
HIST1H1B	HIST1H1B	6873.94	TRUE	-5.37036	7.85813e-08	1.11704e-05	-2.94986	condition on vs pre
FIBCD1	FIBCD1	63.2165	TRUE	-5.36902	7.91639e-08	1.12156e-05	-3.58669	condition on vs pre
C5	C5	19015.2	TRUE	5.36811	7.95654e-08	1.12349e-05	3.8979	condition on vs pre
ANGPTL3	ANGPTL3	6845.66	TRUE	5.36549	8.07275e-08	1.13611e-05	3.9568	condition on vs pre
ATRN	ATRN	8146.33	TRUE	5.36304	8.18332e-08	1.14786e-05	1.63429	condition on vs pre
ALDH4A1	ALDH4A1	7547.62	TRUE	5.3568	8.47084e-08	1.18037e-05	3.19431	condition on vs pre
CKAP2L	CKAP2L	360.099	TRUE	-5.35709	8.45718e-08	1.18037e-05	-2.19587	condition on vs pre
PGLYRP2	PGLYRP2	6662.1	TRUE	5.3529	8.65563e-08	1.20217e-05	3.33244	condition on vs pre
LPCAT3	LPCAT3	2142.01	TRUE	5.35136	8.72963e-08	1.20848e-05	1.45652	condition on vs pre
H6PD	H6PD	16104.3	TRUE	5.34784	8.90081e-08	1.22817e-05	2.53493	condition on vs pre
EIF2S2P2	EIF2S2P2	183.913	TRUE	5.34318	9.13314e-08	1.25613e-05	3.30921	condition on vs pre
PDLIM1P4	PDLIM1P4	89.3359	TRUE	5.34236	9.17459e-08	1.25775e-05	2.29772	condition on vs pre
GPAM	GPAM	10153	TRUE	5.3415	9.21812e-08	1.25964e-05	3.44462	condition on vs pre
BHMT	BHMT	20256.7	TRUE	5.34007	9.29108e-08	1.26553e-05	4.85305	condition on vs pre
DBH	DBH	820.771	TRUE	5.33885	9.3538e-08	1.26999e-05	3.26958	condition on vs pre
LMO7	LMO7	3093.61	TRUE	5.33803	9.39639e-08	1.2717e-05	1.57394	condition on vs pre
SH3BGRL2	SH3BGRL2	2097.3	TRUE	5.33582	9.51137e-08	1.28316e-05	2.98852	condition on vs pre
ABCG5	ABCG5	2461.01	TRUE	5.3323	9.69762e-08	1.30413e-05	4.33628	condition on vs pre
LINC01122	LINC01122	50.5825	TRUE	-5.32701	9.98428e-08	1.33843e-05	-2.76226	condition on vs pre
ASS1	ASS1	20188.6	TRUE	5.32455	1.01204e-07	1.34815e-05	3.42152	condition on vs pre
COBLL1	COBLL1	7813.47	TRUE	5.32505	1.00926e-07	1.34815e-05	2.03677	condition on vs pre
PCK2	PCK2	11647.8	TRUE	5.32355	1.01762e-07	1.35133e-05	2.91894	condition on vs pre
SLC7A2	SLC7A2	14362.5	TRUE	5.32274	1.02217e-07	1.35313e-05	4.49808	condition on vs pre
ACSM2B	ACSM2B	8775.85	TRUE	5.31684	1.05583e-07	1.39334e-05	4.09171	condition on vs pre
FTCD	FTCD	14038.2	TRUE	5.31382	1.07352e-07	1.41228e-05	4.90065	condition on vs pre
C11orf54	C11orf54	4210.55	TRUE	5.31237	1.08209e-07	1.41477e-05	2.21841	condition on vs pre
C1RL	C1RL	6683.89	TRUE	5.3126	1.08075e-07	1.41477e-05	2.3261	condition on vs pre
AC139783.1	AC139783.1	65.0127	TRUE	5.3104	1.09383e-07	1.42572e-05	2.30852	condition on vs pre
TROAP	TROAP	382.811	TRUE	-5.30879	1.10357e-07	1.43399e-05	-2.55763	condition on vs pre
AC129507.2	AC129507.2	42.9259	TRUE	5.30613	1.11975e-07	1.45057e-05	3.07771	condition on vs pre
AL450384.1	AL450384.1	35.3887	TRUE	5.30221	1.14409e-07	1.47758e-05	2.67224	condition on vs pre
LINC02637	LINC02637	207.052	TRUE	5.29701	1.17712e-07	1.51562e-05	3.48312	condition on vs pre
CDHR5	CDHR5	3250.05	TRUE	5.29581	1.18488e-07	1.52099e-05	3.72924	condition on vs pre
RANBP3L	RANBP3L	507.482	TRUE	5.29371	1.19858e-07	1.53393e-05	2.68165	condition on vs pre
PALM2	PALM2	1275.53	TRUE	5.29212	1.20908e-07	1.5427e-05	2.56245	condition on vs pre
ASIC1	ASIC1	177.034	TRUE	-5.28523	1.25547e-07	1.59709e-05	-2.58972	condition on vs pre
AC012065.3	AC012065.3	46.8274	TRUE	5.27828	1.30401e-07	1.64448e-05	2.98178	condition on vs pre
AKR1C5P	AKR1C5P	214.445	TRUE	5.27832	1.30371e-07	1.64448e-05	4.55295	condition on vs pre
SVOPL	SVOPL	69.6398	TRUE	-5.27823	1.30437e-07	1.64448e-05	-2.88526	condition on vs pre
AP000925.1	AP000925.1	201.858	TRUE	5.27479	1.3291e-07	1.67068e-05	2.23744	condition on vs pre
TMPRSS6	TMPRSS6	4891.38	TRUE	5.27389	1.33562e-07	1.67392e-05	3.42535	condition on vs pre
AQP9	AQP9	7151.94	TRUE	5.27276	1.34387e-07	1.67928e-05	3.89206	condition on vs pre
FP325332.1	FP325332.1	454.183	TRUE	5.26867	1.37412e-07	1.70867e-05	2.04344	condition on vs pre
SERPING1	SERPING1	29910.6	TRUE	5.2685	1.37545e-07	1.70867e-05	3.83505	condition on vs pre
LINC02036	LINC02036	68.4751	TRUE	-5.26707	1.38622e-07	1.71701e-05	-2.39127	condition on vs pre
AC015908.1	AC015908.1	11.4299	TRUE	5.2572	1.46265e-07	1.8064e-05	4.31571	condition on vs pre
CNDP1	CNDP1	1773.57	TRUE	5.25421	1.4866e-07	1.83064e-05	3.90509	condition on vs pre
AL139011.2	AL139011.2	822.813	TRUE	5.25029	1.51863e-07	1.86466e-05	1.85614	condition on vs pre
TSHZ2	TSHZ2	2028.27	TRUE	5.2461	1.55352e-07	1.90198e-05	2.29352	condition on vs pre
GPD1	GPD1	2779.63	TRUE	5.24356	1.57506e-07	1.91177e-05	3.9933	condition on vs pre
KLF12	KLF12	2388.66	TRUE	5.24387	1.57244e-07	1.91177e-05	1.90424	condition on vs pre
RDH10	RDH10	2732.62	TRUE	5.24401	1.57125e-07	1.91177e-05	1.56491	condition on vs pre
GPLD1	GPLD1	2780.92	TRUE	5.2423	1.58589e-07	1.91942e-05	3.03156	condition on vs pre
ASPDH	ASPDH	797.859	TRUE	5.24009	1.60501e-07	1.93153e-05	3.37102	condition on vs pre
EFHC2	EFHC2	99.0331	TRUE	-5.24036	1.60267e-07	1.93153e-05	-2.87655	condition on vs pre
F12	F12	10708.6	TRUE	5.23642	1.63721e-07	1.9647e-05	3.58614	condition on vs pre
MTMR10	MTMR10	2550.24	TRUE	5.23244	1.67286e-07	2.0018e-05	1.44476	condition on vs pre
CFH	CFH	42190.2	TRUE	5.22971	1.69774e-07	2.02586e-05	3.92075	condition on vs pre
SHLD2P1	SHLD2P1	483.877	TRUE	5.22901	1.70417e-07	2.02782e-05	2.80507	condition on vs pre
RPL7AP34	RPL7AP34	352.868	TRUE	5.228	1.71353e-07	2.03325e-05	4.49816	condition on vs pre
AC012313.10	AC012313.10	295.517	TRUE	5.22562	1.73572e-07	2.04822e-05	2.65369	condition on vs pre
DAPK1-IT1	DAPK1-IT1	54.5053	TRUE	5.22561	1.73582e-07	2.04822e-05	1.9129	condition on vs pre
TREML4	TREML4	39.8832	TRUE	-5.22452	1.74609e-07	2.05462e-05	-2.78556	condition on vs pre
HS3ST3B1	HS3ST3B1	2202.33	TRUE	5.22271	1.76319e-07	2.06899e-05	3.20037	condition on vs pre
ASGR1	ASGR1	6158.98	TRUE	5.22046	1.78475e-07	2.08851e-05	4.21172	condition on vs pre
TMSB10	TMSB10	21876.1	TRUE	-5.21906	1.79836e-07	2.09863e-05	-1.80153	condition on vs pre
GDA	GDA	1698.91	TRUE	5.21843	1.80449e-07	2.1e-05	3.07245	condition on vs pre
AC002996.1	AC002996.1	6888.1	TRUE	5.2176	1.81258e-07	2.10363e-05	4.49788	condition on vs pre
ZBTB16	ZBTB16	2054.44	TRUE	5.21152	1.87301e-07	2.16783e-05	3.07087	condition on vs pre
CYP3A43	CYP3A43	1012.43	TRUE	5.2101	1.88738e-07	2.17406e-05	4.27329	condition on vs pre
SELENOO	SELENOO	2696.23	TRUE	5.20998	1.88866e-07	2.17406e-05	2.09023	condition on vs pre
CLUH	CLUH	7814.22	TRUE	5.20899	1.89867e-07	2.17966e-05	1.94875	condition on vs pre
AQP3	AQP3	1804.01	TRUE	5.20671	1.92216e-07	2.20067e-05	3.18407	condition on vs pre
AC012313.3	AC012313.3	493.385	TRUE	5.20489	1.94108e-07	2.20986e-05	2.60259	condition on vs pre
AFM	AFM	11131.1	TRUE	5.20462	1.94395e-07	2.20986e-05	5.18866	condition on vs pre
NUF2	NUF2	268.018	TRUE	-5.20444	1.94584e-07	2.20986e-05	-2.23818	condition on vs pre
TMEM86B	TMEM86B	258.839	TRUE	5.20386	1.95188e-07	2.21079e-05	2.11436	condition on vs pre
PON3	PON3	4004.42	TRUE	5.20147	1.97722e-07	2.23352e-05	3.73646	condition on vs pre
A1BG	A1BG	21634.8	TRUE	5.19606	2.03553e-07	2.28114e-05	3.92849	condition on vs pre
HSP90B2P	HSP90B2P	191.358	TRUE	5.19635	2.03241e-07	2.28114e-05	2.03171	condition on vs pre
LINC02484	LINC02484	118.195	TRUE	5.19664	2.02924e-07	2.28114e-05	4.11535	condition on vs pre
CDCA5	CDCA5	316.239	TRUE	-5.19552	2.04149e-07	2.28178e-05	-2.03479	condition on vs pre
CBR3	CBR3	386.963	TRUE	-5.1917	2.08381e-07	2.32295e-05	-1.88021	condition on vs pre
PCSK6	PCSK6	7394.13	TRUE	5.19119	2.08959e-07	2.32329e-05	2.27467	condition on vs pre
PXDC1	PXDC1	2346.77	TRUE	5.1898	2.10516e-07	2.33447e-05	2.43406	condition on vs pre
KRT17P8	KRT17P8	526.65	TRUE	5.18467	2.16399e-07	2.39344e-05	3.82079	condition on vs pre
NADK2	NADK2	6391.87	TRUE	5.1832	2.18116e-07	2.40615e-05	2.29348	condition on vs pre
AC074250.1	AC074250.1	35.0367	TRUE	5.18152	2.20088e-07	2.4216e-05	4.69167	condition on vs pre
MRPL23-AS1	MRPL23-AS1	67.7845	TRUE	5.1789	2.23198e-07	2.44946e-05	2.56764	condition on vs pre
FMO3	FMO3	9599.44	TRUE	5.17817	2.24078e-07	2.45275e-05	3.83161	condition on vs pre
AC084871.1	AC084871.1	152.725	TRUE	5.17594	2.26764e-07	2.46746e-05	2.74517	condition on vs pre
GPT2	GPT2	3770.45	TRUE	5.17561	2.27169e-07	2.46746e-05	2.04324	condition on vs pre
KRT17	KRT17	77.0433	TRUE	-5.17638	2.26226e-07	2.46746e-05	-2.9537	condition on vs pre
MDN1	MDN1	11359.6	TRUE	5.17497	2.27943e-07	2.46954e-05	1.89467	condition on vs pre
DUX4L25	DUX4L25	362.816	TRUE	-5.17265	2.30793e-07	2.49404e-05	-7.93619	condition on vs pre
CYP2A6	CYP2A6	19647.5	TRUE	5.16952	2.34702e-07	2.51702e-05	4.84343	condition on vs pre
GRB14	GRB14	1283.79	TRUE	5.16956	2.34641e-07	2.51702e-05	2.80201	condition on vs pre
UGT1A3	UGT1A3	729.612	TRUE	5.17033	2.33682e-07	2.51702e-05	3.8258	condition on vs pre
FBXW11P1	FBXW11P1	219.573	TRUE	5.16739	2.3738e-07	2.53931e-05	2.7673	condition on vs pre
PALMD	PALMD	1615.88	TRUE	5.16081	2.45878e-07	2.62358e-05	2.41164	condition on vs pre
SLC6A1	SLC6A1	5863.34	TRUE	5.15942	2.47722e-07	2.63662e-05	3.0348	condition on vs pre
ACAA2	ACAA2	12401.1	TRUE	5.1576	2.50138e-07	2.64961e-05	3.21551	condition on vs pre
MASP2	MASP2	4159.46	TRUE	5.15756	2.50193e-07	2.64961e-05	3.81824	condition on vs pre
PCSK9	PCSK9	805.696	TRUE	5.15672	2.51315e-07	2.65485e-05	4.05082	condition on vs pre
NMNAT2	NMNAT2	278.733	TRUE	-5.15576	2.526e-07	2.66179e-05	-3.57304	condition on vs pre
LINC02362	LINC02362	1765.05	TRUE	5.15523	2.53323e-07	2.66278e-05	2.23637	condition on vs pre
MCM10	MCM10	357.636	TRUE	-5.15433	2.54538e-07	2.66893e-05	-2.6513	condition on vs pre
C16orf74	C16orf74	173.269	TRUE	-5.15291	2.56468e-07	2.67188e-05	-1.8751	condition on vs pre
MAP2K1	MAP2K1	2748	TRUE	5.15305	2.56287e-07	2.67188e-05	1.85354	condition on vs pre
PLA2G3	PLA2G3	82.7262	TRUE	-5.15274	2.56712e-07	2.67188e-05	-2.43298	condition on vs pre
SLC39A5	SLC39A5	2198.69	TRUE	5.14901	2.61859e-07	2.71878e-05	3.96909	condition on vs pre
CLDN1	CLDN1	5735.09	TRUE	5.14795	2.63345e-07	2.72752e-05	2.98954	condition on vs pre
ALDH1L1	ALDH1L1	15076.5	TRUE	5.14654	2.65336e-07	2.73477e-05	4.07647	condition on vs pre
CLPX	CLPX	4300.2	TRUE	5.14658	2.65283e-07	2.73477e-05	1.44131	condition on vs pre
PDK4	PDK4	6683.32	TRUE	5.14606	2.66013e-07	2.73509e-05	3.25417	condition on vs pre
AL163636.1	AL163636.1	129.77	TRUE	5.14527	2.67136e-07	2.73998e-05	3.44835	condition on vs pre
ANG	ANG	7719.44	TRUE	5.13963	2.7528e-07	2.8167e-05	3.86217	condition on vs pre
SHPK	SHPK	2325.22	TRUE	5.13712	2.78988e-07	2.84776e-05	1.64652	condition on vs pre
BCO2	BCO2	2587.38	TRUE	5.13588	2.80825e-07	2.85963e-05	3.23753	condition on vs pre
PPARA	PPARA	8483.01	TRUE	5.13235	2.86148e-07	2.90684e-05	1.96087	condition on vs pre
AP001781.1	AP001781.1	278.959	TRUE	5.1316	2.87295e-07	2.91151e-05	3.64529	condition on vs pre
ABCC3	ABCC3	6491.49	TRUE	5.13097	2.88253e-07	2.91424e-05	2.31472	condition on vs pre
HGFAC	HGFAC	3631.84	TRUE	5.13042	2.89101e-07	2.91586e-05	4.39409	condition on vs pre
RACGAP1	RACGAP1	929.795	TRUE	-5.12913	2.9109e-07	2.92894e-05	-1.60882	condition on vs pre
SLCO2B1	SLCO2B1	11794.2	TRUE	5.12776	2.93216e-07	2.94334e-05	2.60225	condition on vs pre
SULT2A1	SULT2A1	5585.35	TRUE	5.12706	2.94309e-07	2.94733e-05	4.31639	condition on vs pre
SCN5A	SCN5A	116.127	TRUE	-5.12559	2.96614e-07	2.96341e-05	-2.52947	condition on vs pre
ACOT12	ACOT12	1407.93	TRUE	5.12472	2.97978e-07	2.97003e-05	4.46297	condition on vs pre
ACADM	ACADM	3798.06	TRUE	5.1238	2.9944e-07	2.97761e-05	1.88044	condition on vs pre
SPRYD4	SPRYD4	3005.6	TRUE	5.11905	3.07081e-07	3.04643e-05	1.55443	condition on vs pre
VIL1	VIL1	996.04	TRUE	5.11611	3.11909e-07	3.08709e-05	2.96571	condition on vs pre
CHRNA4	CHRNA4	1127.87	TRUE	5.11233	3.18217e-07	3.14219e-05	4.37983	condition on vs pre
ANGPTL8	ANGPTL8	735.198	TRUE	5.11064	3.2107e-07	3.15565e-05	3.88609	condition on vs pre
HORMAD2-AS1	HORMAD2-AS1	149.411	TRUE	5.11068	3.21007e-07	3.15565e-05	4.58197	condition on vs pre
MOCS1	MOCS1	1287.11	TRUE	5.1071	3.27135e-07	3.20782e-05	2.18772	condition on vs pre
GCLC	GCLC	3688.6	TRUE	5.10403	3.32492e-07	3.25282e-05	1.37898	condition on vs pre
FAM8A1	FAM8A1	3465.89	TRUE	5.10307	3.34192e-07	3.2568e-05	1.42426	condition on vs pre
ZGPAT	ZGPAT	3148.53	TRUE	5.10293	3.34437e-07	3.2568e-05	2.26114	condition on vs pre
PIMREG	PIMREG	137.584	TRUE	-5.09897	3.41511e-07	3.31183e-05	-1.88948	condition on vs pre
TST	TST	4377.33	TRUE	5.09889	3.41652e-07	3.31183e-05	3.03408	condition on vs pre
AC099668.1	AC099668.1	68.0508	TRUE	5.09593	3.47035e-07	3.35634e-05	2.28031	condition on vs pre
PROS1	PROS1	5876.91	TRUE	5.09444	3.49766e-07	3.37504e-05	3.44571	condition on vs pre
DEPDC7	DEPDC7	779.218	TRUE	5.09337	3.51748e-07	3.38646e-05	3.63462	condition on vs pre
ECM2	ECM2	1386.41	TRUE	5.09245	3.53462e-07	3.39524e-05	2.40437	condition on vs pre
AL138847.2	AL138847.2	332.781	TRUE	5.0904	3.57314e-07	3.42447e-05	2.47216	condition on vs pre
SEMA4G	SEMA4G	1480.11	TRUE	5.08946	3.59089e-07	3.43371e-05	1.86089	condition on vs pre
AC009119.1	AC009119.1	74.9992	TRUE	-5.08668	3.64384e-07	3.4765e-05	-1.956	condition on vs pre
KRTAP10-5	KRTAP10-5	27.1656	TRUE	-5.08451	3.6858e-07	3.50863e-05	-4.69185	condition on vs pre
RIIAD1	RIIAD1	121.049	TRUE	-5.08076	3.75927e-07	3.57055e-05	-2.98573	condition on vs pre
CYP4F3	CYP4F3	11746.8	TRUE	5.07962	3.78185e-07	3.58396e-05	4.39831	condition on vs pre
WFDC3	WFDC3	44.3576	TRUE	-5.07906	3.79297e-07	3.58647e-05	-2.25037	condition on vs pre
VNN1	VNN1	4282	TRUE	5.07669	3.84059e-07	3.62341e-05	3.96526	condition on vs pre
AC087468.1	AC087468.1	41.5304	TRUE	5.07582	3.85827e-07	3.62395e-05	3.79819	condition on vs pre
TMEM82	TMEM82	271.048	TRUE	5.07618	3.85096e-07	3.62395e-05	3.8234	condition on vs pre
AC123768.5	AC123768.5	58.9485	TRUE	-5.07343	3.90707e-07	3.65746e-05	-2.0091	condition on vs pre
SLC47A1P2	SLC47A1P2	54.3791	TRUE	5.07323	3.91121e-07	3.65746e-05	3.60233	condition on vs pre
AC026803.3	AC026803.3	273.657	TRUE	5.07019	3.97426e-07	3.7063e-05	3.74525	condition on vs pre
RPS3AP54	RPS3AP54	25.4642	TRUE	5.06987	3.98094e-07	3.7063e-05	3.37962	condition on vs pre
STEAP3-AS1	STEAP3-AS1	254.26	TRUE	5.06899	3.99936e-07	3.70715e-05	2.01949	condition on vs pre
TAT	TAT	26094.6	TRUE	5.06925	3.99396e-07	3.70715e-05	4.09582	condition on vs pre
APOA5	APOA5	9536.07	TRUE	5.06809	4.01826e-07	3.71654e-05	5.00585	condition on vs pre
CFHR4	CFHR4	1881.01	TRUE	5.06691	4.0433e-07	3.73155e-05	4.3514	condition on vs pre
DEPDC1B	DEPDC1B	218.438	TRUE	-5.06514	4.08093e-07	3.75809e-05	-2.31183	condition on vs pre
AL391095.2	AL391095.2	69.5513	TRUE	5.06435	4.09797e-07	3.76559e-05	4.26872	condition on vs pre
APOD	APOD	2839.67	TRUE	-5.06263	4.13519e-07	3.78896e-05	-2.82535	condition on vs pre
GCNT1P3	GCNT1P3	60.4553	TRUE	5.06235	4.14128e-07	3.78896e-05	2.95739	condition on vs pre
ARHGEF10L	ARHGEF10L	5480.78	TRUE	5.06191	4.1508e-07	3.78949e-05	2.38296	condition on vs pre
ATP6V0A4	ATP6V0A4	161.243	TRUE	-5.06016	4.18914e-07	3.79992e-05	-4.99085	condition on vs pre
AVPR1A	AVPR1A	2212.82	TRUE	5.06031	4.18575e-07	3.79992e-05	3.45623	condition on vs pre
HYAL1	HYAL1	2607.9	TRUE	5.06092	4.17244e-07	3.79992e-05	3.32576	condition on vs pre
MBL2	MBL2	3578.84	TRUE	5.05796	4.23772e-07	3.83577e-05	5.06643	condition on vs pre
MFSD2A	MFSD2A	3030.18	TRUE	5.05198	4.37246e-07	3.9493e-05	3.16585	condition on vs pre
TATDN2P1	TATDN2P1	40.8301	TRUE	-5.05094	4.39651e-07	3.96256e-05	-3.42921	condition on vs pre
AC109809.1	AC109809.1	28.7538	TRUE	5.04924	4.43567e-07	3.98938e-05	2.84303	condition on vs pre
AC027796.3	AC027796.3	429.017	TRUE	5.04372	4.56561e-07	4.09754e-05	1.59736	condition on vs pre
AC242426.2	AC242426.2	114.483	TRUE	5.04144	4.62034e-07	4.10369e-05	2.02258	condition on vs pre
CAT	CAT	14710.4	TRUE	5.03958	4.6655e-07	4.10369e-05	2.47895	condition on vs pre
CYP27A1	CYP27A1	10748.9	TRUE	5.04059	4.64099e-07	4.10369e-05	2.70039	condition on vs pre
CYP2A7	CYP2A7	1158.94	TRUE	5.04186	4.61029e-07	4.10369e-05	3.72691	condition on vs pre
DDX11-AS1	DDX11-AS1	91.8702	TRUE	-5.0396	4.66508e-07	4.10369e-05	-1.67327	condition on vs pre
GNMT	GNMT	3742.78	TRUE	5.04178	4.61224e-07	4.10369e-05	4.25518	condition on vs pre
RPL17P11	RPL17P11	61.7785	TRUE	5.03999	4.65566e-07	4.10369e-05	3.84398	condition on vs pre
SLC17A2	SLC17A2	1555.32	TRUE	5.04018	4.65099e-07	4.10369e-05	4.91994	condition on vs pre
SLCO1B3	SLCO1B3	2982.15	TRUE	5.03985	4.65888e-07	4.10369e-05	4.78091	condition on vs pre
SYNE3	SYNE3	2129.36	TRUE	5.03942	4.66934e-07	4.10369e-05	1.6569	condition on vs pre
AL080248.1	AL080248.1	62.2062	TRUE	5.03755	4.71517e-07	4.13539e-05	5.31715	condition on vs pre
NPHP1	NPHP1	478.111	TRUE	-5.03025	4.89845e-07	4.28725e-05	-1.56678	condition on vs pre
CXCL2	CXCL2	1433.81	TRUE	5.02547	5.02191e-07	4.38625e-05	3.87921	condition on vs pre
AC133548.2	AC133548.2	77.0644	TRUE	-5.02136	5.1308e-07	4.45381e-05	-3.45379	condition on vs pre
ACO1	ACO1	5099.81	TRUE	5.02143	5.1289e-07	4.45381e-05	2.52742	condition on vs pre
KIFC3	KIFC3	2287.63	TRUE	5.02167	5.12236e-07	4.45381e-05	2.53195	condition on vs pre
PANK1	PANK1	2367.54	TRUE	5.01764	5.23096e-07	4.53146e-05	3.02227	condition on vs pre
MYBL2	MYBL2	642.404	TRUE	-5.0172	5.24287e-07	4.53251e-05	-2.41736	condition on vs pre
KF456110.1	KF456110.1	51.719	TRUE	5.0163	5.26762e-07	4.54464e-05	2.43162	condition on vs pre
SLC16A2	SLC16A2	3002.06	TRUE	5.01321	5.35304e-07	4.60894e-05	2.36154	condition on vs pre
AP000781.2	AP000781.2	45.0871	TRUE	5.01242	5.37508e-07	4.61853e-05	3.14973	condition on vs pre
AL161669.1	AL161669.1	37.2346	TRUE	5.00985	5.44725e-07	4.67107e-05	3.75506	condition on vs pre
SEC16B	SEC16B	1339.91	TRUE	5.00707	5.52638e-07	4.72935e-05	2.13132	condition on vs pre
AC004022.1	AC004022.1	127.364	TRUE	5.00363	5.62613e-07	4.74999e-05	3.5324	condition on vs pre
AC009319.1	AC009319.1	61.4895	TRUE	5.00528	5.57813e-07	4.74999e-05	2.2277	condition on vs pre
APOF	APOF	4111.62	TRUE	5.00393	5.61723e-07	4.74999e-05	4.14713	condition on vs pre
GLYCTK-AS1	GLYCTK-AS1	71.7447	TRUE	5.0051	5.58319e-07	4.74999e-05	1.97156	condition on vs pre
HGD	HGD	5534.45	TRUE	5.00492	5.58854e-07	4.74999e-05	3.33227	condition on vs pre
LRP1	LRP1	49178.8	TRUE	5.00353	5.62898e-07	4.74999e-05	2.17632	condition on vs pre
NUSAP1	NUSAP1	1135.25	TRUE	-5.00459	5.59801e-07	4.74999e-05	-1.72994	condition on vs pre
F11	F11	3937.86	TRUE	4.9989	5.76582e-07	4.85578e-05	4.78892	condition on vs pre
COX6B1P4	COX6B1P4	123.767	TRUE	4.99837	5.78177e-07	4.85955e-05	4.93958	condition on vs pre
AC055854.1	AC055854.1	225.798	TRUE	-4.99693	5.82508e-07	4.87812e-05	-4.22603	condition on vs pre
CPB2-AS1	CPB2-AS1	812.645	TRUE	4.99687	5.82689e-07	4.87812e-05	2.17332	condition on vs pre
DEPDC1	DEPDC1	371.824	TRUE	-4.99454	5.89766e-07	4.92763e-05	-2.04194	condition on vs pre
ABCG8	ABCG8	4696.46	TRUE	4.99347	5.93038e-07	4.94521e-05	3.54883	condition on vs pre
ABHD2	ABHD2	25823	TRUE	4.98906	6.06735e-07	5.04711e-05	1.98193	condition on vs pre
PZP	PZP	5472	TRUE	4.98877	6.0764e-07	5.04711e-05	4.19958	condition on vs pre
CDC20	CDC20	530.415	TRUE	-4.98813	6.09674e-07	5.05409e-05	-2.46463	condition on vs pre
OTOP3	OTOP3	25.5731	TRUE	-4.98758	6.11411e-07	5.05859e-05	-3.4018	condition on vs pre
CPN2	CPN2	4848.85	TRUE	4.98654	6.1469e-07	5.06923e-05	4.11234	condition on vs pre
GPR146	GPR146	417.405	TRUE	4.98642	6.1509e-07	5.06923e-05	1.34808	condition on vs pre
EVA1A	EVA1A	1035.19	TRUE	4.98249	6.27703e-07	5.16313e-05	3.29432	condition on vs pre
C3	C3	295254	TRUE	4.9815	6.30923e-07	5.16954e-05	3.6318	condition on vs pre
CES1	CES1	28550.5	TRUE	4.98186	6.29768e-07	5.16954e-05	4.51032	condition on vs pre
CCNE1	CCNE1	139.361	TRUE	-4.9755	6.50785e-07	5.31912e-05	-2.03141	condition on vs pre
MBL1P	MBL1P	205.958	TRUE	4.97499	6.52506e-07	5.31912e-05	2.92105	condition on vs pre
UGT1A1	UGT1A1	5465.33	TRUE	4.97486	6.52945e-07	5.31912e-05	4.44607	condition on vs pre
DLSTP1	DLSTP1	279.491	TRUE	4.97381	6.56484e-07	5.33768e-05	1.78	condition on vs pre
ADGRL2	ADGRL2	2448	TRUE	4.9724	6.61301e-07	5.36655e-05	2.33118	condition on vs pre
AC007491.1	AC007491.1	25.472	TRUE	-4.97123	6.6528e-07	5.37435e-05	-3.557	condition on vs pre
DHODH	DHODH	2723.04	TRUE	4.971	6.66069e-07	5.37435e-05	2.57099	condition on vs pre
E2F7	E2F7	274.525	TRUE	-4.97156	6.64169e-07	5.37435e-05	-2.34353	condition on vs pre
CEBPA	CEBPA	5156.27	TRUE	4.97044	6.68025e-07	5.37989e-05	2.4643	condition on vs pre
PKP1	PKP1	437.303	TRUE	-4.96733	6.78797e-07	5.45627e-05	-4.13207	condition on vs pre
EGFR	EGFR	5736.92	TRUE	4.96654	6.81578e-07	5.46824e-05	3.14978	condition on vs pre
HIST3H2A	HIST3H2A	750.974	TRUE	-4.96608	6.83203e-07	5.47092e-05	-2.94109	condition on vs pre
FGG	FGG	129332	TRUE	4.96279	6.94867e-07	5.55383e-05	4.49441	condition on vs pre
TFR2	TFR2	12709.6	TRUE	4.95689	7.16319e-07	5.71343e-05	4.10231	condition on vs pre
UGP2	UGP2	10948.1	TRUE	4.95656	7.17533e-07	5.71343e-05	2.51596	condition on vs pre
GJB1	GJB1	3870.36	TRUE	4.95328	7.29727e-07	5.78876e-05	3.41037	condition on vs pre
TIGD2	TIGD2	1118.45	TRUE	4.95336	7.2941e-07	5.78876e-05	1.66288	condition on vs pre
CDCA2	CDCA2	275.68	TRUE	-4.95205	7.34367e-07	5.81467e-05	-2.30704	condition on vs pre
CES1P1	CES1P1	507.369	TRUE	4.94898	7.46027e-07	5.89598e-05	7.10157	condition on vs pre
ALAD	ALAD	4779.52	TRUE	4.94768	7.51017e-07	5.92437e-05	1.97764	condition on vs pre
AC020978.5	AC020978.5	654.713	TRUE	4.94682	7.54351e-07	5.9396e-05	2.37416	condition on vs pre
AL645922.1	AL645922.1	269.795	TRUE	4.94557	7.59198e-07	5.96668e-05	3.36989	condition on vs pre
SORD	SORD	9164.08	TRUE	4.94412	7.64872e-07	6.00014e-05	2.81961	condition on vs pre
FMO5	FMO5	7864.3	TRUE	4.94336	7.67872e-07	6.01254e-05	2.7086	condition on vs pre
ARID3C	ARID3C	131.202	TRUE	4.942	7.73271e-07	6.04364e-05	3.80404	condition on vs pre
FAM135B	FAM135B	196.009	TRUE	-4.94076	7.78196e-07	6.05977e-05	-2.36651	condition on vs pre
TRIM55	TRIM55	729.388	TRUE	4.94097	7.77334e-07	6.05977e-05	4.23362	condition on vs pre
FUOM	FUOM	1594.79	TRUE	4.93799	7.8933e-07	6.13519e-05	3.69418	condition on vs pre
AC093225.1	AC093225.1	280.599	TRUE	4.93594	7.97675e-07	6.18272e-05	2.42233	condition on vs pre
ATP2B3	ATP2B3	105.135	TRUE	-4.93577	7.98364e-07	6.18272e-05	-3.1672	condition on vs pre
FAM242F	FAM242F	36.6322	TRUE	-4.93237	8.12371e-07	6.27972e-05	-3.48499	condition on vs pre
HHIP	HHIP	880.439	TRUE	4.9317	8.15161e-07	6.28981e-05	1.93683	condition on vs pre
PHYH	PHYH	5473.19	TRUE	4.93012	8.21779e-07	6.32934e-05	2.81635	condition on vs pre
N4BP2L1	N4BP2L1	2183.32	TRUE	4.92872	8.27702e-07	6.36339e-05	2.26951	condition on vs pre
HOXC13	HOXC13	392.905	TRUE	-4.92273	8.53459e-07	6.54953e-05	-2.76262	condition on vs pre
CHAD	CHAD	567.661	TRUE	4.91952	8.67569e-07	6.62182e-05	2.19441	condition on vs pre
SCARB1	SCARB1	5596.46	TRUE	4.91963	8.67066e-07	6.62182e-05	2.01892	condition on vs pre
SHLD2P3	SHLD2P3	112.943	TRUE	4.92002	8.65354e-07	6.62182e-05	2.69283	condition on vs pre
CLRN3	CLRN3	271.673	TRUE	4.91774	8.75511e-07	6.65844e-05	4.08349	condition on vs pre
TENM1	TENM1	1941.54	TRUE	4.91798	8.74409e-07	6.65844e-05	3.76023	condition on vs pre
FOLH1B	FOLH1B	254.235	TRUE	4.91664	8.80411e-07	6.68371e-05	3.34855	condition on vs pre
SFXN5	SFXN5	3330.61	TRUE	4.91621	8.82379e-07	6.68595e-05	2.01475	condition on vs pre
SMKR1	SMKR1	56.1786	TRUE	-4.91588	8.83864e-07	6.68595e-05	-2.26223	condition on vs pre
SLC9A3R2	SLC9A3R2	3766.93	TRUE	4.91433	8.90849e-07	6.72679e-05	1.75839	condition on vs pre
NR1I3	NR1I3	2600.58	TRUE	4.91383	8.93163e-07	6.73225e-05	2.85222	condition on vs pre
AC091057.6	AC091057.6	295.545	TRUE	-4.91245	8.99454e-07	6.76763e-05	-1.58458	condition on vs pre
TM6SF2	TM6SF2	668.579	TRUE	4.90917	9.14603e-07	6.86942e-05	3.65971	condition on vs pre
ERLIN1	ERLIN1	2606.04	TRUE	4.90692	9.25188e-07	6.93261e-05	1.77143	condition on vs pre
PTPRR	PTPRR	74.7792	TRUE	-4.90668	9.2629e-07	6.93261e-05	-2.51707	condition on vs pre
GBP7	GBP7	1567.78	TRUE	4.90589	9.30031e-07	6.94833e-05	4.47716	condition on vs pre
DOK4	DOK4	750.379	TRUE	4.90341	9.41865e-07	7.01859e-05	1.87679	condition on vs pre
SLC25A42	SLC25A42	1544.38	TRUE	4.90323	9.42748e-07	7.01859e-05	2.16653	condition on vs pre
TAT-AS1	TAT-AS1	145.585	TRUE	4.90262	9.45651e-07	7.02785e-05	3.81689	condition on vs pre
PLK4	PLK4	281.986	TRUE	-4.90195	9.48923e-07	7.03981e-05	-1.75308	condition on vs pre
AP002414.2	AP002414.2	335.998	TRUE	4.9009	9.54007e-07	7.06516e-05	1.94178	condition on vs pre
GJB2	GJB2	782.337	TRUE	4.89722	9.72012e-07	7.18593e-05	3.14926	condition on vs pre
SOWAHB	SOWAHB	945.29	TRUE	4.89612	9.77466e-07	7.20112e-05	2.27867	condition on vs pre
Z97653.2	Z97653.2	66.1771	TRUE	-4.89638	9.76161e-07	7.20112e-05	-2.65268	condition on vs pre
ACSM5	ACSM5	5270.14	TRUE	4.8938	9.89072e-07	7.25846e-05	3.90074	condition on vs pre
HS1BP3-IT1	HS1BP3-IT1	67.4784	TRUE	4.89374	9.89365e-07	7.25846e-05	2.83414	condition on vs pre
SERPINA11	SERPINA11	5625.97	TRUE	4.89354	9.9039e-07	7.25846e-05	3.2673	condition on vs pre
GATM	GATM	30960	TRUE	4.89269	9.94646e-07	7.27706e-05	3.57298	condition on vs pre
AC099066.2	AC099066.2	37.4713	TRUE	-4.89215	9.97396e-07	7.2846e-05	-2.63856	condition on vs pre
PLIN5	PLIN5	2319.46	TRUE	4.88751	1.02119e-06	7.44551e-05	2.83621	condition on vs pre
APOL1	APOL1	5352.27	TRUE	4.88512	1.03365e-06	7.52341e-05	2.01409	condition on vs pre
C1R	C1R	37212.7	TRUE	4.88434	1.03778e-06	7.54054e-05	3.52666	condition on vs pre
AC007637.1	AC007637.1	151.603	TRUE	4.88327	1.04342e-06	7.55683e-05	2.31065	condition on vs pre
LBP	LBP	10409.9	TRUE	4.88324	1.04359e-06	7.55683e-05	4.12331	condition on vs pre
CD164L2	CD164L2	32.7046	TRUE	-4.88215	1.04934e-06	7.5855e-05	-2.34692	condition on vs pre
C8G	C8G	2059.19	TRUE	4.88137	1.0535e-06	7.60257e-05	3.80878	condition on vs pre
AL138720.1	AL138720.1	36.4878	TRUE	-4.8801	1.06034e-06	7.63898e-05	-2.0593	condition on vs pre
DAPK1	DAPK1	4340.01	TRUE	4.87568	1.08437e-06	7.79879e-05	1.94781	condition on vs pre
SDS	SDS	2995.24	TRUE	4.87407	1.09321e-06	7.84907e-05	3.06753	condition on vs pre
ZMAT4	ZMAT4	63.3024	TRUE	-4.87301	1.0991e-06	7.87803e-05	-3.57355	condition on vs pre
APOL6	APOL6	9976.47	TRUE	4.86843	1.12489e-06	8.04923e-05	1.64791	condition on vs pre
MOGAT3	MOGAT3	572.859	TRUE	4.86774	1.1288e-06	8.06357e-05	1.97692	condition on vs pre
AC106897.1	AC106897.1	22.1295	TRUE	-4.86704	1.13284e-06	8.06529e-05	-2.57272	condition on vs pre
HNF4A	HNF4A	5731.05	TRUE	4.86704	1.13285e-06	8.06529e-05	4.35705	condition on vs pre
AC093833.1	AC093833.1	20.2327	TRUE	-4.86603	1.13864e-06	8.08832e-05	-4.85427	condition on vs pre
MT1X	MT1X	7020.16	TRUE	4.86581	1.1399e-06	8.08832e-05	4.00615	condition on vs pre
KIF20A	KIF20A	832.157	TRUE	-4.86537	1.14244e-06	8.0928e-05	-2.51685	condition on vs pre
CACNA1S	CACNA1S	34.4517	TRUE	-4.86243	1.15955e-06	8.18665e-05	-3.95735	condition on vs pre
GLTPD2	GLTPD2	689.211	TRUE	4.86244	1.15948e-06	8.18665e-05	3.26783	condition on vs pre
AC007098.2	AC007098.2	25.7432	TRUE	4.86098	1.16807e-06	8.23308e-05	2.29999	condition on vs pre
KIF23	KIF23	749.759	TRUE	-4.86031	1.172e-06	8.24702e-05	-2.24013	condition on vs pre
SMOC1	SMOC1	1461.83	TRUE	4.85653	1.19462e-06	8.39228e-05	3.34289	condition on vs pre
FAM99A	FAM99A	2241.58	TRUE	4.85574	1.19941e-06	8.41195e-05	4.64538	condition on vs pre
BCAS4	BCAS4	2516.79	TRUE	-4.85401	1.2099e-06	8.47148e-05	-1.35673	condition on vs pre
GOLIM4	GOLIM4	3465.49	TRUE	4.8501	1.23402e-06	8.62614e-05	1.55829	condition on vs pre
CLCN3P1	CLCN3P1	147.533	TRUE	-4.84827	1.24543e-06	8.68835e-05	-1.83069	condition on vs pre
LRP5	LRP5	7642.82	TRUE	4.84802	1.24702e-06	8.68835e-05	2.16674	condition on vs pre
KCNQ3	KCNQ3	200.561	TRUE	-4.84726	1.25181e-06	8.70735e-05	-2.29415	condition on vs pre
CYP2C19	CYP2C19	5359.28	TRUE	4.84628	1.25799e-06	8.73601e-05	3.49719	condition on vs pre
MUC20	MUC20	1390.89	TRUE	4.84376	1.27405e-06	8.83307e-05	2.41937	condition on vs pre
AC084781.1	AC084781.1	66.7092	TRUE	4.8392	1.30361e-06	9.00143e-05	4.15026	condition on vs pre
PALM3	PALM3	358.755	TRUE	4.83954	1.30138e-06	9.00143e-05	2.77167	condition on vs pre
SLC22A3	SLC22A3	930.453	TRUE	4.83904	1.30471e-06	9.00143e-05	3.75861	condition on vs pre
CHST13	CHST13	604.989	TRUE	4.83781	1.3128e-06	9.04105e-05	3.44942	condition on vs pre
PGM1	PGM1	6617.7	TRUE	4.83752	1.31472e-06	9.04105e-05	2.38329	condition on vs pre
ANKRD24	ANKRD24	298.842	TRUE	4.83461	1.33408e-06	9.15932e-05	1.64598	condition on vs pre
F10	F10	2269.11	TRUE	4.8342	1.33682e-06	9.16327e-05	3.41849	condition on vs pre
DDI2	DDI2	7645.3	TRUE	4.83236	1.34923e-06	9.23343e-05	1.44263	condition on vs pre
AC007238.1	AC007238.1	46.9202	TRUE	-4.83151	1.35501e-06	9.2392e-05	-3.51241	condition on vs pre
APBA1	APBA1	2574.98	TRUE	4.8316	1.35442e-06	9.2392e-05	2.71994	condition on vs pre
RPL7AP66	RPL7AP66	17.2838	TRUE	-4.83127	1.35662e-06	9.2392e-05	-2.94528	condition on vs pre
DPYS	DPYS	7742.22	TRUE	4.83064	1.36097e-06	9.25392e-05	4.5372	condition on vs pre
G0S2	G0S2	1636.91	TRUE	4.82954	1.36848e-06	9.29006e-05	3.55877	condition on vs pre
AC087164.2	AC087164.2	405.848	TRUE	4.82673	1.38796e-06	9.40727e-05	3.06431	condition on vs pre
KCNK9	KCNK9	66.6351	TRUE	-4.82601	1.39295e-06	9.41453e-05	-3.39339	condition on vs pre
PKLR	PKLR	2810.73	TRUE	4.82594	1.39348e-06	9.41453e-05	4.55306	condition on vs pre
LINC01615	LINC01615	23.2915	TRUE	-4.82473	1.40194e-06	9.44158e-05	-4.42204	condition on vs pre
RHEBP2	RHEBP2	89.923	TRUE	4.82487	1.40095e-06	9.44158e-05	3.49435	condition on vs pre
F5	F5	12918.1	TRUE	4.8243	1.40497e-06	9.44696e-05	3.75891	condition on vs pre
AURKA	AURKA	483.428	TRUE	-4.82222	1.41966e-06	9.50769e-05	-1.87154	condition on vs pre
CFHR3	CFHR3	7628.34	TRUE	4.82185	1.42236e-06	9.50769e-05	4.52938	condition on vs pre
MT1H	MT1H	1839.08	TRUE	4.82151	1.42476e-06	9.50769e-05	4.56105	condition on vs pre
SLC43A3	SLC43A3	2942.49	TRUE	4.82144	1.42522e-06	9.50769e-05	2.46425	condition on vs pre
UBE2C	UBE2C	705.121	TRUE	-4.82254	1.41741e-06	9.50769e-05	-2.83946	condition on vs pre
FOXJ1	FOXJ1	97.687	TRUE	-4.81736	1.45468e-06	9.68898e-05	-3.97651	condition on vs pre
BPIFA2	BPIFA2	14.9171	TRUE	-4.81682	1.45862e-06	9.69992e-05	-5.12942	condition on vs pre
ENPEP	ENPEP	1661.24	TRUE	4.81639	1.4618e-06	9.70585e-05	2.76054	condition on vs pre
CA5A	CA5A	2564.3	TRUE	4.81351	1.483e-06	9.83117e-05	3.09133	condition on vs pre
ST3GAL2	ST3GAL2	2249.81	TRUE	4.80985	1.51044e-06	9.99744e-05	1.4632	condition on vs pre
CEP55	CEP55	351.328	TRUE	-4.80691	1.53281e-06	0.000101001	-2.25631	condition on vs pre
HIST3H2BB	HIST3H2BB	1651.46	TRUE	-4.80744	1.52874e-06	0.000101001	-2.26985	condition on vs pre
TMEM176B	TMEM176B	10353.5	TRUE	4.80687	1.53309e-06	0.000101001	3.49625	condition on vs pre
F11-AS1	F11-AS1	247.566	TRUE	4.80483	1.54884e-06	0.00010188	3.95224	condition on vs pre
KANSL1L	KANSL1L	1595.52	TRUE	4.80331	1.56066e-06	0.000102339	1.39221	condition on vs pre
UROC1	UROC1	2715.58	TRUE	4.8035	1.55912e-06	0.000102339	4.48744	condition on vs pre
AL445493.3	AL445493.3	56.2342	TRUE	4.80227	1.56878e-06	0.000102396	3.97805	condition on vs pre
LIPC	LIPC	3386.67	TRUE	4.80254	1.56665e-06	0.000102396	3.43084	condition on vs pre
SLC41A2	SLC41A2	3844.65	TRUE	4.80232	1.56835e-06	0.000102396	2.54354	condition on vs pre
SHANK3	SHANK3	1841.22	TRUE	4.79774	1.60469e-06	0.000104579	2.05722	condition on vs pre
CLDN14	CLDN14	607.425	TRUE	4.79693	1.61113e-06	0.000104747	3.32088	condition on vs pre
EXO1	EXO1	456.251	TRUE	-4.79649	1.61468e-06	0.000104747	-2.14359	condition on vs pre
IL1RAP	IL1RAP	2978.2	TRUE	4.79665	1.61343e-06	0.000104747	2.43225	condition on vs pre
ITIH3	ITIH3	30854.1	TRUE	4.79575	1.6207e-06	0.000104976	4.33517	condition on vs pre
LGI2	LGI2	97.9158	TRUE	-4.79465	1.62956e-06	0.000105346	-1.72153	condition on vs pre
SCG5	SCG5	212.173	TRUE	4.79443	1.63138e-06	0.000105346	2.87736	condition on vs pre
ARG1	ARG1	8267.38	TRUE	4.79311	1.64215e-06	0.00010588	4.19532	condition on vs pre
AL160269.1	AL160269.1	288.812	TRUE	4.78548	1.70578e-06	0.000109815	3.06569	condition on vs pre
CYP3A4	CYP3A4	38601.2	TRUE	4.78323	1.72499e-06	0.000110884	4.42726	condition on vs pre
LIME1	LIME1	1664.51	TRUE	4.78289	1.72797e-06	0.000110907	2.5721	condition on vs pre
TMEM238L	TMEM238L	34.4269	TRUE	4.78101	1.74414e-06	0.000111775	2.49499	condition on vs pre
HS3ST3A1	HS3ST3A1	320.81	TRUE	4.78069	1.74697e-06	0.000111788	3.04035	condition on vs pre
AL139174.1	AL139174.1	85.6156	TRUE	4.77717	1.77776e-06	0.000113415	2.38554	condition on vs pre
C1S	C1S	41934.1	TRUE	4.77726	1.77701e-06	0.000113415	3.41227	condition on vs pre
CRYZL2P-SEC16B	CRYZL2P-SEC16B	2215.41	TRUE	4.77651	1.78362e-06	0.000113618	2.01581	condition on vs pre
AC099329.2	AC099329.2	315.948	TRUE	4.77619	1.78647e-06	0.000113628	1.4895	condition on vs pre
PIK3C2G	PIK3C2G	1936.82	TRUE	4.77433	1.80306e-06	0.000114512	3.34219	condition on vs pre
A1CF	A1CF	13036.1	TRUE	4.77389	1.80702e-06	0.000114592	4.37937	condition on vs pre
MTCO3P42	MTCO3P42	17.1572	TRUE	-4.77229	1.82147e-06	0.000115336	-5.74438	condition on vs pre
PIPOX	PIPOX	5680.36	TRUE	4.77102	1.83298e-06	0.000115891	3.51083	condition on vs pre
EPB41L4B	EPB41L4B	2020.63	TRUE	4.76913	1.85019e-06	0.000116805	2.16153	condition on vs pre
PPFIA4	PPFIA4	1294.99	TRUE	-4.76754	1.86485e-06	0.000117555	-3.45982	condition on vs pre
CYP2C8	CYP2C8	21210.7	TRUE	4.76652	1.87432e-06	0.000117976	4.5961	condition on vs pre
NR0B2	NR0B2	779.002	TRUE	4.76602	1.87898e-06	0.000118094	4.37156	condition on vs pre
LEPR	LEPR	4678.28	TRUE	4.76192	1.91763e-06	0.000120345	2.79607	condition on vs pre
ARSH	ARSH	26.1112	TRUE	-4.75989	1.937e-06	0.000121201	-2.97513	condition on vs pre
CREB3L3	CREB3L3	2419.36	TRUE	4.75996	1.93632e-06	0.000121201	4.43079	condition on vs pre
GLS2	GLS2	3953.75	TRUE	4.75845	1.95085e-06	0.000121583	3.93145	condition on vs pre
RARRES2	RARRES2	8426.76	TRUE	4.75891	1.9464e-06	0.000121583	3.37129	condition on vs pre
TYRO3P	TYRO3P	380.741	TRUE	4.75836	1.95171e-06	0.000121583	1.49551	condition on vs pre
MIA2	MIA2	4943.62	TRUE	4.7571	1.96397e-06	0.000121809	1.86099	condition on vs pre
SLC25A47	SLC25A47	5144.16	TRUE	4.75718	1.96317e-06	0.000121809	4.67424	condition on vs pre
UGT2B10	UGT2B10	6233.1	TRUE	4.75736	1.96137e-06	0.000121809	4.75287	condition on vs pre
ANLN	ANLN	1058.81	TRUE	-4.75622	1.97254e-06	0.000122162	-2.46569	condition on vs pre
FGA	FGA	274723	TRUE	4.7541	1.99329e-06	0.000123107	4.93284	condition on vs pre
FGB	FGB	152983	TRUE	4.75407	1.99361e-06	0.000123107	4.40787	condition on vs pre
AC020931.1	AC020931.1	123.771	TRUE	4.75192	2.0149e-06	0.0001237	2.1339	condition on vs pre
AC069294.1	AC069294.1	43.465	TRUE	4.75221	2.01208e-06	0.0001237	3.87919	condition on vs pre
AC099509.1	AC099509.1	54.5525	TRUE	4.75234	2.01077e-06	0.0001237	2.54895	condition on vs pre
MTSS1	MTSS1	5584.49	TRUE	4.75193	2.01481e-06	0.0001237	1.55141	condition on vs pre
AP000962.1	AP000962.1	25.1166	TRUE	4.75031	2.03101e-06	0.000124509	2.56614	condition on vs pre
SLC28A1	SLC28A1	1719.47	TRUE	4.74857	2.04864e-06	0.000125408	4.49776	condition on vs pre
IPO8P1	IPO8P1	42.3299	TRUE	-4.74773	2.05709e-06	0.000125744	-3.38418	condition on vs pre
KLF15	KLF15	1865.21	TRUE	4.74621	2.07265e-06	0.000126512	3.736	condition on vs pre
ABCA8	ABCA8	3856.45	TRUE	4.74489	2.0862e-06	0.000127156	3.2274	condition on vs pre
DGAT2	DGAT2	5972.24	TRUE	4.74435	2.09174e-06	0.000127311	3.18748	condition on vs pre
ABHD15	ABHD15	1551.93	TRUE	4.74123	2.12419e-06	0.000128802	1.6693	condition on vs pre
CCND2P1	CCND2P1	384.085	TRUE	4.74083	2.12841e-06	0.000128802	3.73361	condition on vs pre
TLX2	TLX2	60.2666	TRUE	-4.74101	2.1265e-06	0.000128802	-2.39702	condition on vs pre
WWC2	WWC2	2814.5	TRUE	4.74151	2.12132e-06	0.000128802	1.87637	condition on vs pre
RGN	RGN	3470.9	TRUE	4.73776	2.16094e-06	0.000130584	3.9336	condition on vs pre
MSRA	MSRA	745.321	TRUE	4.73645	2.17495e-06	0.000131244	2.56025	condition on vs pre
FDPSP3	FDPSP3	44.7319	TRUE	4.73123	2.23161e-06	0.000134471	2.08353	condition on vs pre
AC025279.2	AC025279.2	103.731	TRUE	4.72993	2.24592e-06	0.000135141	3.00271	condition on vs pre
AC244100.4	AC244100.4	33.8286	TRUE	4.72933	2.25257e-06	0.000135349	4.57598	condition on vs pre
RMDN2	RMDN2	647.877	TRUE	4.72679	2.281e-06	0.000136863	1.61218	condition on vs pre
FNDC3A	FNDC3A	6093.68	TRUE	4.7254	2.29665e-06	0.000137608	1.23671	condition on vs pre
PHLPP1	PHLPP1	2241.66	TRUE	4.72215	2.33369e-06	0.000139572	1.81459	condition on vs pre
RPL7AP15	RPL7AP15	135.488	TRUE	4.72194	2.33603e-06	0.000139572	2.25081	condition on vs pre
GGCT	GGCT	1772.85	TRUE	-4.72008	2.35757e-06	0.000140661	-1.53525	condition on vs pre
F7	F7	2861.69	TRUE	4.71871	2.37345e-06	0.000141409	2.64968	condition on vs pre
KLB	KLB	2255.72	TRUE	4.71574	2.40831e-06	0.000143284	2.20418	condition on vs pre
FUNDC1	FUNDC1	472.8	TRUE	-4.71532	2.41337e-06	0.000143384	-1.59259	condition on vs pre
SLC22A10	SLC22A10	920.797	TRUE	4.71462	2.4216e-06	0.000143671	3.83098	condition on vs pre
NEURL2	NEURL2	199.598	TRUE	4.71419	2.42675e-06	0.000143775	2.29493	condition on vs pre
AL358232.1	AL358232.1	17.3538	TRUE	4.71148	2.45929e-06	0.0001455	3.40928	condition on vs pre
SLC6A13	SLC6A13	447.001	TRUE	4.71021	2.47465e-06	0.000146205	3.67385	condition on vs pre
SPC24	SPC24	564.059	TRUE	-4.70872	2.49279e-06	0.000147071	-1.47387	condition on vs pre
ABHD6	ABHD6	1044.56	TRUE	4.70737	2.50931e-06	0.00014784	2.28207	condition on vs pre
KLF9	KLF9	2702.89	TRUE	4.70512	2.53713e-06	0.000149271	1.80994	condition on vs pre
THAP12P7	THAP12P7	154.324	TRUE	4.70448	2.54514e-06	0.000149535	1.8056	condition on vs pre
AC096633.1	AC096633.1	63.4843	TRUE	4.70272	2.56715e-06	0.000150619	3.17368	condition on vs pre
HRASLS	HRASLS	39.7818	TRUE	-4.70161	2.58124e-06	0.000151045	-2.55933	condition on vs pre
SPATA25	SPATA25	89.7955	TRUE	4.70158	2.58154e-06	0.000151045	1.95247	condition on vs pre
KLC4	KLC4	2931.46	TRUE	4.69864	2.61897e-06	0.000152813	1.66026	condition on vs pre
NHLH1	NHLH1	41.1159	TRUE	-4.69874	2.61769e-06	0.000152813	-2.40587	condition on vs pre
CYP4V2	CYP4V2	10010.3	TRUE	4.6981	2.6259e-06	0.000153007	1.79671	condition on vs pre
FOXO1	FOXO1	1788.75	TRUE	4.69679	2.6428e-06	0.000153779	1.61461	condition on vs pre
CST6	CST6	285.45	TRUE	-4.69564	2.65774e-06	0.000154359	-3.62321	condition on vs pre
HJV	HJV	1731.52	TRUE	4.69546	2.66004e-06	0.000154359	4.2814	condition on vs pre
HSD17B13	HSD17B13	7623.64	TRUE	4.69348	2.68595e-06	0.000155649	3.12203	condition on vs pre
ABCB4	ABCB4	4775.57	TRUE	4.69096	2.71923e-06	0.000157363	3.72019	condition on vs pre
SLC47A1	SLC47A1	3102.38	TRUE	4.69038	2.72703e-06	0.000157598	2.70772	condition on vs pre
JPT1	JPT1	1615.72	TRUE	-4.68678	2.7754e-06	0.000160175	-1.46148	condition on vs pre
NPC1L1	NPC1L1	1327.98	TRUE	4.68395	2.814e-06	0.000162182	3.57493	condition on vs pre
C3P1	C3P1	6294.98	TRUE	4.68277	2.83031e-06	0.000162558	4.74356	condition on vs pre
CPB2	CPB2	10173.1	TRUE	4.68264	2.83203e-06	0.000162558	4.47743	condition on vs pre
DNAJB3	DNAJB3	198.315	TRUE	4.68281	2.82966e-06	0.000162558	3.33665	condition on vs pre
AOC4P	AOC4P	628.01	TRUE	4.68208	2.8398e-06	0.000162783	3.63784	condition on vs pre
SLC30A10	SLC30A10	3695.43	TRUE	4.68146	2.84834e-06	0.000163052	4.24059	condition on vs pre
CFAP57	CFAP57	693.085	TRUE	4.68076	2.85813e-06	0.000163392	2.61221	condition on vs pre
NPM1P11	NPM1P11	72.7724	TRUE	4.67948	2.87607e-06	0.000164196	3.79545	condition on vs pre
AC087273.1	AC087273.1	29.2008	TRUE	4.67903	2.88242e-06	0.000164337	4.20888	condition on vs pre
RPL39L	RPL39L	555.631	TRUE	-4.67804	2.89635e-06	0.000164909	-1.99238	condition on vs pre
PC	PC	7757.43	TRUE	4.67745	2.90461e-06	0.000165157	2.52024	condition on vs pre
BFSP1	BFSP1	119.554	TRUE	-4.67591	2.92646e-06	0.000166177	-2.50412	condition on vs pre
LINC01711	LINC01711	12.5212	TRUE	-4.67386	2.95591e-06	0.000167444	-3.84155	condition on vs pre
NT5E	NT5E	2045.92	TRUE	4.67353	2.96064e-06	0.000167444	2.5685	condition on vs pre
TMEM121	TMEM121	329.792	TRUE	-4.67359	2.95976e-06	0.000167444	-1.46561	condition on vs pre
AC005089.1	AC005089.1	297.454	TRUE	4.67275	2.97197e-06	0.000167524	2.11881	condition on vs pre
AC134312.1	AC134312.1	398.717	TRUE	4.67308	2.96723e-06	0.000167524	1.59209	condition on vs pre
FOXN3	FOXN3	3622.83	TRUE	4.67261	2.97392e-06	0.000167524	1.66155	condition on vs pre
ASL	ASL	5608.61	TRUE	4.67215	2.98065e-06	0.00016768	2.4842	condition on vs pre
CFHR2	CFHR2	7319.39	TRUE	4.67087	2.99928e-06	0.000167688	2.75918	condition on vs pre
GCGR	GCGR	1944.84	TRUE	4.67136	2.99209e-06	0.000167688	4.30062	condition on vs pre
IVL	IVL	70.7173	TRUE	-4.67078	3.00057e-06	0.000167688	-3.7304	condition on vs pre
MARC2	MARC2	3100.93	TRUE	4.6712	2.9945e-06	0.000167688	1.99309	condition on vs pre
SPP1	SPP1	7981.59	TRUE	-4.67138	2.99184e-06	0.000167688	-3.16138	condition on vs pre
TREM1	TREM1	244.543	TRUE	-4.67003	3.01151e-06	0.000168077	-2.28617	condition on vs pre
BDH1	BDH1	7342.24	TRUE	4.66935	3.02152e-06	0.000168414	2.58539	condition on vs pre
CPED1	CPED1	2631.51	TRUE	4.66811	3.0398e-06	0.000168988	2.29739	condition on vs pre
ZCCHC14	ZCCHC14	2985.73	TRUE	4.66837	3.03601e-06	0.000168988	1.82657	condition on vs pre
ABCA6	ABCA6	7889.8	TRUE	4.66582	3.07384e-06	0.000169988	3.07546	condition on vs pre
CFL2	CFL2	2494.48	TRUE	4.66659	3.06241e-06	0.000169988	2.37637	condition on vs pre
CNN1	CNN1	163.922	TRUE	-4.66583	3.07373e-06	0.000169988	-2.25503	condition on vs pre
KIF4A	KIF4A	466.394	TRUE	-4.66636	3.06589e-06	0.000169988	-2.25075	condition on vs pre
AC008760.2	AC008760.2	864.467	TRUE	4.6655	3.07868e-06	0.000170034	3.55726	condition on vs pre
HABP2	HABP2	8968.72	TRUE	4.66452	3.09336e-06	0.000170401	4.04263	condition on vs pre
TUT7	TUT7	4426.42	TRUE	4.66455	3.09286e-06	0.000170401	1.51869	condition on vs pre
ADH6	ADH6	6537.27	TRUE	4.66017	3.15953e-06	0.000173819	4.36754	condition on vs pre
HEPN1	HEPN1	27.5615	TRUE	4.65984	3.16461e-06	0.000173873	7.26916	condition on vs pre
KISS1R	KISS1R	34.942	TRUE	-4.65759	3.19928e-06	0.00017555	-4.43284	condition on vs pre
UGT2B27P	UGT2B27P	518.922	TRUE	4.65664	3.21414e-06	0.000176137	4.61034	condition on vs pre
ADGRF5P1	ADGRF5P1	72.4301	TRUE	-4.65626	3.22e-06	0.000176231	-2.07909	condition on vs pre
AC087632.1	AC087632.1	309.987	TRUE	-4.65577	3.2277e-06	0.000176424	-3.41531	condition on vs pre
SORBS2	SORBS2	6730.81	TRUE	4.65516	3.23724e-06	0.000176717	1.912	condition on vs pre
AL121888.1	AL121888.1	68.5788	TRUE	-4.65476	3.24363e-06	0.000176838	-2.85385	condition on vs pre
IDO2	IDO2	741.532	TRUE	4.65348	3.26376e-06	0.000177707	3.4225	condition on vs pre
PCLAF	PCLAF	809.346	TRUE	-4.65314	3.26919e-06	0.000177774	-1.2626	condition on vs pre
MT1E	MT1E	5298.36	TRUE	4.65283	3.27416e-06	0.000177816	3.70258	condition on vs pre
RIDA	RIDA	5102.1	TRUE	4.65008	3.31811e-06	0.000179972	2.8284	condition on vs pre
MBNL3	MBNL3	5077.6	TRUE	4.64796	3.35235e-06	0.000181597	2.44238	condition on vs pre
AC073957.3	AC073957.3	1363.95	TRUE	4.6475	3.35979e-06	0.000181767	1.42203	condition on vs pre
TNNI3	TNNI3	46.7304	TRUE	-4.64496	3.40136e-06	0.000183782	-3.99199	condition on vs pre
AC020658.3	AC020658.3	39.1613	TRUE	-4.64381	3.42034e-06	0.000183795	-2.6494	condition on vs pre
DPYD	DPYD	4517.49	TRUE	4.6442	3.41391e-06	0.000183795	2.03235	condition on vs pre
OR10Q1	OR10Q1	21.4304	TRUE	-4.64364	3.4233e-06	0.000183795	-4.38637	condition on vs pre
UGT1A2P	UGT1A2P	126.094	TRUE	4.64411	3.41539e-06	0.000183795	3.57428	condition on vs pre
ZBBX	ZBBX	20.4937	TRUE	-4.64456	3.40805e-06	0.000183795	-4.69636	condition on vs pre
NR1H4	NR1H4	2082.31	TRUE	4.64207	3.44932e-06	0.000184958	4.1824	condition on vs pre
CUX2	CUX2	1790.8	TRUE	4.6409	3.46893e-06	0.000185774	3.77171	condition on vs pre
HSD17B11	HSD17B11	2318.47	TRUE	4.64018	3.48104e-06	0.000186187	2.63805	condition on vs pre
SLCO1B7	SLCO1B7	129.411	TRUE	4.63969	3.48928e-06	0.000186393	4.81087	condition on vs pre
SPAG9	SPAG9	5634.94	TRUE	4.63893	3.50218e-06	0.000186846	1.23764	condition on vs pre
ENTPD8	ENTPD8	309.154	TRUE	4.63671	3.54005e-06	0.000188629	1.90359	condition on vs pre
ERVV-1	ERVV-1	69.6567	TRUE	-4.63358	3.59393e-06	0.000191259	-3.05293	condition on vs pre
AC129492.1	AC129492.1	1395.94	TRUE	4.632	3.62155e-06	0.000192246	1.96983	condition on vs pre
MOGAT1	MOGAT1	137.074	TRUE	4.63211	3.61957e-06	0.000192246	3.93516	condition on vs pre
IL27	IL27	150.332	TRUE	4.63062	3.64568e-06	0.000193043	3.70119	condition on vs pre
PAH	PAH	18585.9	TRUE	4.63075	3.64339e-06	0.000193043	4.32083	condition on vs pre
DMRTA1	DMRTA1	802.688	TRUE	4.62897	3.67493e-06	0.000194349	3.03146	condition on vs pre
SLC27A5	SLC27A5	19698.6	TRUE	4.62683	3.71296e-06	0.000196116	2.96693	condition on vs pre
DST	DST	30613.2	TRUE	4.62554	3.73622e-06	0.000196792	1.53033	condition on vs pre
FMR1	FMR1	2422.05	TRUE	4.62535	3.73971e-06	0.000196792	1.2185	condition on vs pre
FURIN	FURIN	10982.3	TRUE	4.62549	3.73714e-06	0.000196792	2.4159	condition on vs pre
AKR1C4	AKR1C4	3411.35	TRUE	4.62446	3.75573e-06	0.00019739	4.37484	condition on vs pre
AC066616.2	AC066616.2	95.4213	TRUE	4.62216	3.79762e-06	0.000199098	3.25619	condition on vs pre
RIBC2	RIBC2	161.751	TRUE	-4.62236	3.79397e-06	0.000199098	-2.2504	condition on vs pre
NTSR1	NTSR1	112.159	TRUE	4.62069	3.82471e-06	0.00020027	2.68419	condition on vs pre
AP000550.1	AP000550.1	247.313	TRUE	-4.61933	3.84975e-06	0.000201332	-1.86496	condition on vs pre
PPP2R1B	PPP2R1B	5482.21	TRUE	4.61795	3.87541e-06	0.000202424	2.25471	condition on vs pre
F9	F9	9308.07	TRUE	4.61724	3.88881e-06	0.000202874	4.62121	condition on vs pre
AC106739.1	AC106739.1	109.076	TRUE	4.61625	3.90727e-06	0.000203587	1.89639	condition on vs pre
AC097063.1	AC097063.1	112.478	TRUE	4.6113	4.00161e-06	0.00020799	2.51345	condition on vs pre
KCNT2	KCNT2	881.478	TRUE	4.61147	3.99829e-06	0.00020799	2.85697	condition on vs pre
HMGN2P47	HMGN2P47	34.0949	TRUE	4.61075	4.01217e-06	0.000208284	4.5022	condition on vs pre
HIST1H2BI	HIST1H2BI	2285.99	TRUE	-4.61	4.02674e-06	0.000208529	-2.85445	condition on vs pre
LINC01665	LINC01665	45.8538	TRUE	-4.61006	4.02556e-06	0.000208529	-5.1261	condition on vs pre
CAP2P1	CAP2P1	101.707	TRUE	4.607	4.08515e-06	0.000211295	1.40816	condition on vs pre
AL445190.1	AL445190.1	15.3522	TRUE	4.60591	4.10674e-06	0.000211895	3.23857	condition on vs pre
CICP19	CICP19	38.6335	TRUE	-4.60611	4.10275e-06	0.000211895	-4.52907	condition on vs pre
ABLIM3	ABLIM3	3737.27	TRUE	4.60411	4.14225e-06	0.000213347	1.79339	condition on vs pre
FABP6	FABP6	38.2234	TRUE	-4.60373	4.15e-06	0.000213347	-3.76209	condition on vs pre
ZNF365	ZNF365	226.592	TRUE	-4.60384	4.14776e-06	0.000213347	-3.03413	condition on vs pre
ALDH1B1	ALDH1B1	3915.58	TRUE	4.60159	4.19277e-06	0.000215285	2.45576	condition on vs pre
MYRIP	MYRIP	1399.37	TRUE	4.60078	4.20914e-06	0.000215864	2.57816	condition on vs pre
SORBS1	SORBS1	3346.9	TRUE	4.59878	4.2498e-06	0.000217685	1.48623	condition on vs pre
AC005538.3	AC005538.3	54.4646	TRUE	4.59782	4.26929e-06	0.00021804	2.99398	condition on vs pre
BACH2	BACH2	576.026	TRUE	4.59807	4.26432e-06	0.00021804	2.20983	condition on vs pre
MAMDC4	MAMDC4	1612.25	TRUE	4.59768	4.27216e-06	0.00021804	2.00408	condition on vs pre
ABCA1	ABCA1	12472.3	TRUE	4.59613	4.30405e-06	0.000219077	2.29686	condition on vs pre
BUB1B	BUB1B	497.528	TRUE	-4.59569	4.31318e-06	0.000219077	-2.27006	condition on vs pre
NEU4	NEU4	980.447	TRUE	4.59593	4.30817e-06	0.000219077	3.4823	condition on vs pre
TJP2	TJP2	6224.1	TRUE	4.59576	4.31178e-06	0.000219077	1.48915	condition on vs pre
CAPN5	CAPN5	1682.83	TRUE	4.59534	4.32048e-06	0.000219185	2.88386	condition on vs pre
CYP2B6	CYP2B6	4736.77	TRUE	4.59271	4.37525e-06	0.000221698	3.90918	condition on vs pre
AC005336.1	AC005336.1	437.532	TRUE	4.58773	4.48097e-06	0.000226784	3.1641	condition on vs pre
CPNE8	CPNE8	651.95	TRUE	4.58615	4.51487e-06	0.000228227	2.39514	condition on vs pre
ACMSD	ACMSD	1685.37	TRUE	4.58365	4.56921e-06	0.00023015	3.70888	condition on vs pre
AGXT2	AGXT2	1851.93	TRUE	4.58407	4.5602e-06	0.00023015	4.17701	condition on vs pre
MRPS36P4	MRPS36P4	25.9495	TRUE	4.58374	4.56723e-06	0.00023015	3.31345	condition on vs pre
MT1M	MT1M	890.799	TRUE	4.5834	4.57476e-06	0.000230156	4.30745	condition on vs pre
CD14	CD14	7812.85	TRUE	4.58284	4.58698e-06	0.000230497	2.80121	condition on vs pre
HIST1H2AB	HIST1H2AB	1252.33	TRUE	-4.58036	4.64178e-06	0.000232249	-2.6913	condition on vs pre
LRRC10B	LRRC10B	53.0081	TRUE	-4.58027	4.64378e-06	0.000232249	-2.72828	condition on vs pre
PALM2-AKAP2	PALM2-AKAP2	1509.64	TRUE	4.58041	4.64076e-06	0.000232249	3.16743	condition on vs pre
RPS2P7	RPS2P7	13.6043	TRUE	-4.58058	4.63696e-06	0.000232249	-4.68476	condition on vs pre
AP003031.1	AP003031.1	20.7171	TRUE	4.57981	4.65396e-06	0.000232484	3.29502	condition on vs pre
AC009166.1	AC009166.1	18.0584	TRUE	4.57546	4.75166e-06	0.00023632	4.33463	condition on vs pre
HNRNPH1P3	HNRNPH1P3	22.4019	TRUE	-4.57563	4.74788e-06	0.00023632	-4.09829	condition on vs pre
QRSL1P1	QRSL1P1	90.4937	TRUE	4.5754	4.75306e-06	0.00023632	3.67649	condition on vs pre
RBM22P1	RBM22P1	15.9383	TRUE	-4.57563	4.74792e-06	0.00023632	-4.3387	condition on vs pre
AC091675.1	AC091675.1	28.4741	TRUE	4.57479	4.76689e-06	0.000236729	4.35471	condition on vs pre
TIGD3	TIGD3	56.3215	TRUE	-4.57408	4.78318e-06	0.00023726	-1.99467	condition on vs pre
ADGRG6	ADGRG6	5194.09	TRUE	4.57374	4.79086e-06	0.000237363	2.89364	condition on vs pre
CDC45	CDC45	238.188	TRUE	-4.5711	4.85172e-06	0.000239818	-2.07585	condition on vs pre
PRAC2	PRAC2	36.7216	TRUE	-4.57111	4.85157e-06	0.000239818	-4.30393	condition on vs pre
CDH23	CDH23	1551.33	TRUE	4.56587	4.97424e-06	0.000245587	2.6389	condition on vs pre
MICU3	MICU3	499.867	TRUE	4.56488	4.99771e-06	0.000246459	2.5948	condition on vs pre
LINGO1-AS1	LINGO1-AS1	31.2905	TRUE	-4.56232	5.05919e-06	0.000249201	-3.73742	condition on vs pre
CFAP61	CFAP61	100.073	TRUE	-4.56179	5.07188e-06	0.000249535	-2.02487	condition on vs pre
AC111000.1	AC111000.1	87.4832	TRUE	4.56072	5.09775e-06	0.000250517	3.57086	condition on vs pre
ACADL	ACADL	1718.51	TRUE	4.55896	5.14065e-06	0.000252332	2.25297	condition on vs pre
CFB	CFB	65314.6	TRUE	4.55818	5.15977e-06	0.000252978	2.3689	condition on vs pre
LRRC28	LRRC28	3313.46	TRUE	4.55742	5.17864e-06	0.00025361	1.39015	condition on vs pre
AC106886.2	AC106886.2	168.926	TRUE	-4.55651	5.20108e-06	0.000254415	-2.496	condition on vs pre
ARMC3	ARMC3	85.4258	TRUE	-4.55587	5.21687e-06	0.000254892	-2.33876	condition on vs pre
HOXB13	HOXB13	255.127	TRUE	-4.55057	5.35004e-06	0.000261098	-3.61392	condition on vs pre
TMEM125	TMEM125	611.393	TRUE	-4.55032	5.35656e-06	0.000261115	-2.07526	condition on vs pre
KCTD9P4	KCTD9P4	103.134	TRUE	4.55006	5.36303e-06	0.00026113	3.28165	condition on vs pre
CTXND1	CTXND1	677.672	TRUE	4.54951	5.37703e-06	0.000261511	2.12323	condition on vs pre
PLS3	PLS3	3899.32	TRUE	4.54922	5.38447e-06	0.000261573	2.30526	condition on vs pre
AC010307.3	AC010307.3	58.1804	TRUE	-4.54875	5.3966e-06	0.000261862	-2.88575	condition on vs pre
LINC01767	LINC01767	102.46	TRUE	4.54833	5.40742e-06	0.000262087	3.26578	condition on vs pre
THRSP	THRSP	2150.95	TRUE	4.54746	5.42962e-06	0.000262862	3.02188	condition on vs pre
SCLY	SCLY	1468.59	TRUE	4.54629	5.45991e-06	0.000264026	1.31516	condition on vs pre
AC243836.1	AC243836.1	44.4723	TRUE	4.54293	5.54769e-06	0.000267965	3.10535	condition on vs pre
SNX29P2	SNX29P2	317.934	TRUE	4.54143	5.58738e-06	0.000269575	2.20401	condition on vs pre
CFHR1	CFHR1	8591.06	TRUE	4.54092	5.60082e-06	0.000269916	3.69565	condition on vs pre
FAM230G	FAM230G	48.4545	TRUE	-4.54018	5.62063e-06	0.000270456	-4.10771	condition on vs pre
MAN1A1	MAN1A1	7843.83	TRUE	4.54002	5.62478e-06	0.000270456	2.39659	condition on vs pre
FP671120.2	FP671120.2	4015.93	TRUE	-4.53931	5.64396e-06	0.00027107	-13.0841	condition on vs pre
F13B	F13B	2792.02	TRUE	4.539	5.65219e-06	0.00027109	4.4262	condition on vs pre
IMPA1	IMPA1	1126.67	TRUE	4.53881	5.65717e-06	0.00027109	1.54511	condition on vs pre
COL4A6	COL4A6	135.401	TRUE	-4.53836	5.66922e-06	0.00027136	-2.09759	condition on vs pre
SMLR1	SMLR1	1303.04	TRUE	4.53733	5.69714e-06	0.000272389	3.86108	condition on vs pre
NAT8L	NAT8L	142.353	TRUE	-4.53566	5.7424e-06	0.000274155	-2.41062	condition on vs pre
SLC9B2	SLC9B2	1034.59	TRUE	4.53549	5.74702e-06	0.000274155	2.93599	condition on vs pre
LMAN1L	LMAN1L	35.9572	TRUE	-4.53443	5.77587e-06	0.000275221	-2.62985	condition on vs pre
AC108941.2	AC108941.2	33.6336	TRUE	4.53013	5.89463e-06	0.000280564	4.8047	condition on vs pre
SMUG1P1	SMUG1P1	86.1501	TRUE	4.52972	5.9063e-06	0.000280805	4.58226	condition on vs pre
AP001783.1	AP001783.1	53.1194	TRUE	4.52907	5.92426e-06	0.000281037	5.06775	condition on vs pre
SHF	SHF	610.995	TRUE	4.52907	5.92446e-06	0.000281037	1.73436	condition on vs pre
HIST2H2AA4	HIST2H2AA4	2151.18	TRUE	-4.52784	5.95892e-06	0.000282356	-1.92612	condition on vs pre
DDTL	DDTL	493.777	TRUE	4.52741	5.97105e-06	0.000282614	1.79025	condition on vs pre
KANK1	KANK1	7024.42	TRUE	4.52315	6.09263e-06	0.000288047	1.71442	condition on vs pre
MLIP	MLIP	1248.68	TRUE	4.52289	6.10004e-06	0.000288075	3.86418	condition on vs pre
RHNO1	RHNO1	702.444	TRUE	-4.52178	6.13208e-06	0.000289266	-1.38048	condition on vs pre
ECHDC3	ECHDC3	2329.51	TRUE	4.52119	6.14916e-06	0.000289749	2.201	condition on vs pre
RBP5	RBP5	2585.1	TRUE	4.51887	6.21719e-06	0.000292629	2.68143	condition on vs pre
S100A11	S100A11	4846.76	TRUE	-4.51739	6.26079e-06	0.000294354	-1.79913	condition on vs pre
HIST1H3B	HIST1H3B	9276.31	TRUE	-4.51695	6.27369e-06	0.000294634	-2.85988	condition on vs pre
SLC2A1-AS1	SLC2A1-AS1	108.427	TRUE	-4.5161	6.2989e-06	0.00029549	-2.00192	condition on vs pre
AP006248.2	AP006248.2	61.0974	TRUE	4.51398	6.36237e-06	0.000298138	4.20212	condition on vs pre
CIDEB	CIDEB	3639.14	TRUE	4.51344	6.37856e-06	0.000298566	3.53401	condition on vs pre
AC115619.1	AC115619.1	915.498	TRUE	4.5123	6.41276e-06	0.000299835	4.21839	condition on vs pre
PHBP8	PHBP8	32.8578	TRUE	4.51035	6.47206e-06	0.000302274	4.40269	condition on vs pre
REM2	REM2	100.077	TRUE	-4.50995	6.48431e-06	0.000302513	-1.4573	condition on vs pre
LINC01348	LINC01348	1439.67	TRUE	4.50952	6.49731e-06	0.000302786	2.51177	condition on vs pre
RRM2	RRM2	1402.17	TRUE	-4.50929	6.50459e-06	0.000302792	-1.58531	condition on vs pre
CYP7B1	CYP7B1	2221.92	TRUE	4.50804	6.54305e-06	0.000303915	2.65367	condition on vs pre
TMEM220	TMEM220	1194.5	TRUE	4.50807	6.54206e-06	0.000303915	3.07334	condition on vs pre
MT1JP	MT1JP	60.4624	TRUE	4.50568	6.61602e-06	0.000306968	2.93202	condition on vs pre
KIF2C	KIF2C	439.492	TRUE	-4.50521	6.63072e-06	0.000307313	-2.0068	condition on vs pre
AC132154.1	AC132154.1	113.297	TRUE	-4.50379	6.67537e-06	0.000309044	-2.66772	condition on vs pre
HPN	HPN	8878.08	TRUE	4.50308	6.69746e-06	0.00030939	2.36594	condition on vs pre
NR1H3	NR1H3	1796.3	TRUE	4.50324	6.69249e-06	0.00030939	1.64641	condition on vs pre
C4B	C4B	70964.7	TRUE	4.50086	6.76787e-06	0.000312303	1.60968	condition on vs pre
HOTTIP	HOTTIP	58.9455	TRUE	-4.49973	6.80412e-06	0.000313634	-2.76095	condition on vs pre
SULT1E1	SULT1E1	655.38	TRUE	4.49692	6.89446e-06	0.000317452	4.40202	condition on vs pre
CPN1	CPN1	1028.24	TRUE	4.49501	6.9567e-06	0.000319971	4.38821	condition on vs pre
FES	FES	1207.29	TRUE	4.49415	6.98474e-06	0.000320912	2.16604	condition on vs pre
ECHDC1	ECHDC1	1116.67	TRUE	4.49249	7.03965e-06	0.000323084	1.52784	condition on vs pre
MPP2	MPP2	304.583	TRUE	-4.49068	7.09966e-06	0.000325486	-3.29081	condition on vs pre
KCNJ8	KCNJ8	939.714	TRUE	4.49036	7.11036e-06	0.000325624	2.47084	condition on vs pre
SLC12A5	SLC12A5	171.256	TRUE	-4.48829	7.17978e-06	0.000328448	-2.0084	condition on vs pre
AC093583.1	AC093583.1	191.152	TRUE	4.48762	7.20241e-06	0.000329128	1.59201	condition on vs pre
GBA3	GBA3	1905.75	TRUE	4.48649	7.24072e-06	0.000330522	3.96994	condition on vs pre
RRAS2	RRAS2	1079.75	TRUE	4.4856	7.27103e-06	0.000331548	1.84955	condition on vs pre
SORCS1	SORCS1	392.969	TRUE	-4.48507	7.28896e-06	0.000332008	-3.49179	condition on vs pre
HOXD1	HOXD1	18.452	TRUE	-4.48356	7.34076e-06	0.000334008	-3.02803	condition on vs pre
GNE	GNE	6206.17	TRUE	4.48303	7.35909e-06	0.000334483	1.91586	condition on vs pre
PCDH8	PCDH8	38.8337	TRUE	-4.48262	7.37323e-06	0.000334767	-4.30544	condition on vs pre
HSD11B1	HSD11B1	4603.63	TRUE	4.48106	7.42729e-06	0.00033686	3.63138	condition on vs pre
ZBTB44	ZBTB44	3004.99	TRUE	4.48083	7.43541e-06	0.000336868	1.052	condition on vs pre
AC015908.3	AC015908.3	64.427	TRUE	4.47838	7.52115e-06	0.000340025	3.60445	condition on vs pre
ATP11A	ATP11A	2974.64	TRUE	4.47858	7.51404e-06	0.000340025	1.59499	condition on vs pre
PINK1	PINK1	3361.31	TRUE	4.47742	7.55519e-06	0.0003412	1.78718	condition on vs pre
ABCC6	ABCC6	6416.91	TRUE	4.47692	7.57272e-06	0.000341627	2.73813	condition on vs pre
AADACP1	AADACP1	169.916	TRUE	4.4761	7.60186e-06	0.000342577	3.73886	condition on vs pre
CNTLN	CNTLN	1486.88	TRUE	4.47421	7.66951e-06	0.000343686	2.11628	condition on vs pre
CYCSP38	CYCSP38	51.7891	TRUE	4.47463	7.65439e-06	0.000343686	1.97934	condition on vs pre
GIPC2	GIPC2	565.051	TRUE	4.47411	7.67287e-06	0.000343686	3.35526	condition on vs pre
HIST1H4A	HIST1H4A	1942.18	TRUE	-4.47385	7.68252e-06	0.000343686	-2.71877	condition on vs pre
IGF2-AS	IGF2-AS	175.78	TRUE	4.47517	7.63519e-06	0.000343686	3.66601	condition on vs pre
SPA17	SPA17	262.717	TRUE	-4.47415	7.67164e-06	0.000343686	-1.27222	condition on vs pre
TP53TG3	TP53TG3	86.3031	TRUE	-4.47382	7.68327e-06	0.000343686	-5.31727	condition on vs pre
SLC2A12	SLC2A12	280.195	TRUE	4.47343	7.69764e-06	0.000343966	1.96844	condition on vs pre
AC010280.3	AC010280.3	56.1787	TRUE	4.4726	7.72751e-06	0.000344574	4.30423	condition on vs pre
RPSAP70	RPSAP70	84.6958	TRUE	4.4728	7.72006e-06	0.000344574	3.37486	condition on vs pre
GAS2	GAS2	795.342	TRUE	4.47224	7.74055e-06	0.000344792	3.16649	condition on vs pre
CENPF	CENPF	3893.03	TRUE	-4.47177	7.75739e-06	0.00034518	-2.09407	condition on vs pre
CNKSR3	CNKSR3	7698.57	TRUE	4.47083	7.7917e-06	0.000345765	1.88205	condition on vs pre
LINC01268	LINC01268	242.382	TRUE	4.47084	7.79141e-06	0.000345765	1.87494	condition on vs pre
PLGLB2	PLGLB2	5166.75	TRUE	4.47074	7.79503e-06	0.000345765	4.23121	condition on vs pre
DPF1	DPF1	57.7344	TRUE	-4.47021	7.81428e-06	0.000346256	-2.26266	condition on vs pre
GLUD1	GLUD1	15913.4	TRUE	4.46862	7.87262e-06	0.000348347	1.74293	condition on vs pre
HMGCS2	HMGCS2	30869.3	TRUE	4.46847	7.8781e-06	0.000348347	3.45966	condition on vs pre
PON1	PON1	6195.07	TRUE	4.46825	7.88613e-06	0.000348347	4.08104	condition on vs pre
OPN1MW3	OPN1MW3	48.1298	TRUE	-4.4658	7.97709e-06	0.000351997	-4.42458	condition on vs pre
LEAP2	LEAP2	3646.68	TRUE	4.46539	7.99234e-06	0.000352303	3.20392	condition on vs pre
AC021483.1	AC021483.1	46.7578	TRUE	4.46479	8.01477e-06	0.000352925	2.0359	condition on vs pre
KCNH1-IT1	KCNH1-IT1	17.3423	TRUE	-4.46385	8.04996e-06	0.000354106	-3.9939	condition on vs pre
AC006249.1	AC006249.1	40.8165	TRUE	4.46267	8.09449e-06	0.000354668	2.8386	condition on vs pre
AL161793.1	AL161793.1	20.0041	TRUE	-4.4624	8.10459e-06	0.000354668	-3.80787	condition on vs pre
BCHE	BCHE	2431.55	TRUE	4.46295	8.08371e-06	0.000354668	4.06193	condition on vs pre
PRODH2	PRODH2	2160.9	TRUE	4.46244	8.10302e-06	0.000354668	4.34892	condition on vs pre
TBX15	TBX15	488.914	TRUE	4.46315	8.0762e-06	0.000354668	3.91211	condition on vs pre
ZC3H12C	ZC3H12C	1018.06	TRUE	4.4602	8.18814e-06	0.000357954	2.00294	condition on vs pre
TPRG1	TPRG1	1400.21	TRUE	4.45931	8.22242e-06	0.000359083	2.04263	condition on vs pre
ARHGAP20	ARHGAP20	219.237	TRUE	4.45852	8.25291e-06	0.000359716	2.28111	condition on vs pre
TUBAP4	TUBAP4	16.2862	TRUE	4.45849	8.25392e-06	0.000359716	2.69882	condition on vs pre
VAV2	VAV2	2344.15	TRUE	4.45822	8.26421e-06	0.000359795	1.7371	condition on vs pre
AL583722.1	AL583722.1	49.3003	TRUE	-4.458	8.27295e-06	0.000359805	-2.01574	condition on vs pre
FCN2	FCN2	809.682	TRUE	4.45496	8.39106e-06	0.000364568	3.92679	condition on vs pre
UBE2T	UBE2T	451.293	TRUE	-4.45403	8.42743e-06	0.000365773	-2.53078	condition on vs pre
HNF1A	HNF1A	1102.39	TRUE	4.45323	8.45876e-06	0.000366757	1.84585	condition on vs pre
LINC01315	LINC01315	77.835	TRUE	-4.45224	8.4981e-06	0.000368086	-2.5022	condition on vs pre
AL161740.1	AL161740.1	84.0566	TRUE	4.44846	8.649e-06	0.000374239	4.60084	condition on vs pre
PLA2G2A	PLA2G2A	667.028	TRUE	4.44593	8.75121e-06	0.000378276	3.97974	condition on vs pre
CLDN23	CLDN23	351.927	TRUE	4.44244	8.89463e-06	0.000384083	1.33027	condition on vs pre
AC105918.1	AC105918.1	38.2272	TRUE	4.44189	8.91733e-06	0.000384353	3.55898	condition on vs pre
SLC8A2	SLC8A2	126.509	TRUE	-4.44185	8.91904e-06	0.000384353	-3.95609	condition on vs pre
GALNT2	GALNT2	6918.47	TRUE	4.44081	8.96211e-06	0.00038548	1.468	condition on vs pre
PRKCA	PRKCA	1875.19	TRUE	4.44078	8.96338e-06	0.00038548	1.78194	condition on vs pre
SYT8	SYT8	114.522	TRUE	-4.43841	9.06262e-06	0.000389353	-2.88655	condition on vs pre
TPPP2	TPPP2	139.546	TRUE	4.43587	9.17006e-06	0.000393569	3.43971	condition on vs pre
RNFT1P2	RNFT1P2	36.7874	TRUE	4.43532	9.19356e-06	0.000394179	3.55809	condition on vs pre
COL25A1	COL25A1	204.722	TRUE	4.43346	9.27335e-06	0.000396613	2.45832	condition on vs pre
GADD45A	GADD45A	1232.38	TRUE	4.43371	9.26263e-06	0.000396613	2.03387	condition on vs pre
PECR	PECR	2707.17	TRUE	4.43334	9.27843e-06	0.000396613	2.36013	condition on vs pre
HPR	HPR	3939.24	TRUE	4.43307	9.28991e-06	0.000396704	4.18287	condition on vs pre
AL138789.1	AL138789.1	14.8081	TRUE	-4.43113	9.37397e-06	0.000399636	-3.0158	condition on vs pre
TLE1	TLE1	3542.8	TRUE	4.43105	9.37746e-06	0.000399636	1.24084	condition on vs pre
ORM1	ORM1	86113.3	TRUE	4.43024	9.41285e-06	0.000400741	4.54275	condition on vs pre
COQ8A	COQ8A	3310.91	TRUE	4.42939	9.45002e-06	0.00040192	1.47385	condition on vs pre
ADHFE1	ADHFE1	1144.53	TRUE	4.42528	9.63182e-06	0.000409241	2.93342	condition on vs pre
LYNX1	LYNX1	1176.85	TRUE	4.42456	9.66372e-06	0.000410185	1.88136	condition on vs pre
LYPD3	LYPD3	256.394	TRUE	-4.42234	9.76398e-06	0.000413612	-1.39427	condition on vs pre
METTL7B	METTL7B	1437.9	TRUE	4.42254	9.75494e-06	0.000413612	4.11955	condition on vs pre
ATP13A5	ATP13A5	194.756	TRUE	-4.42206	9.77633e-06	0.000413722	-4.6598	condition on vs pre
AL157786.1	AL157786.1	137.785	TRUE	4.41962	9.88725e-06	0.000417165	1.87194	condition on vs pre
CCDC151	CCDC151	68.1668	TRUE	-4.41987	9.87581e-06	0.000417165	-1.865	condition on vs pre
SLC16A10	SLC16A10	1036.89	TRUE	4.41983	9.87774e-06	0.000417165	2.2815	condition on vs pre
CENPU	CENPU	517.633	TRUE	-4.41433	1.01325e-05	0.000427088	-1.54097	condition on vs pre
AC079753.1	AC079753.1	68.7441	TRUE	-4.41196	1.02439e-05	0.000431353	-2.02278	condition on vs pre
AC022335.1	AC022335.1	37.2151	TRUE	4.41108	1.02856e-05	0.000432253	4.09232	condition on vs pre
HIST2H4A	HIST2H4A	16273	TRUE	-4.41108	1.02857e-05	0.000432253	-2.51073	condition on vs pre
FGD4	FGD4	2702.32	TRUE	4.4095	1.03608e-05	0.000434979	1.47479	condition on vs pre
RMI2	RMI2	345.044	TRUE	-4.40647	1.0507e-05	0.000440681	-2.06883	condition on vs pre
SMO	SMO	1397.39	TRUE	4.40566	1.05463e-05	0.00044189	1.77819	condition on vs pre
FNDC4	FNDC4	831.045	TRUE	4.40531	1.05634e-05	0.000442169	2.94686	condition on vs pre
ATP7B	ATP7B	2457.93	TRUE	4.40453	1.06013e-05	0.000442892	1.62662	condition on vs pre
BCRP7	BCRP7	24.163	TRUE	-4.40453	1.06016e-05	0.000442892	-3.09827	condition on vs pre
MCM2	MCM2	1539.85	TRUE	-4.40309	1.06721e-05	0.000445401	-1.43491	condition on vs pre
AC104964.1	AC104964.1	56.0462	TRUE	4.40205	1.07231e-05	0.000447086	2.32675	condition on vs pre
PROX1	PROX1	9289.61	TRUE	4.40107	1.07717e-05	0.000448672	3.91078	condition on vs pre
AC099508.2	AC099508.2	74.3949	TRUE	4.40057	1.07968e-05	0.000449278	2.13363	condition on vs pre
AC099677.1	AC099677.1	169.793	TRUE	4.40011	1.08195e-05	0.00044955	2.2542	condition on vs pre
GTSE1	GTSE1	297.552	TRUE	-4.40001	1.08246e-05	0.00044955	-2.03626	condition on vs pre
PKNOX2	PKNOX2	187.56	TRUE	-4.39767	1.0942e-05	0.000453979	-2.36805	condition on vs pre
CYP4F11	CYP4F11	2662.14	TRUE	4.39709	1.0971e-05	0.000454295	2.68287	condition on vs pre
MED12L	MED12L	293.11	TRUE	-4.39715	1.09684e-05	0.000454295	-1.81122	condition on vs pre
RNA5SP46	RNA5SP46	8.45059	TRUE	4.39446	1.11051e-05	0.000459397	3.89495	condition on vs pre
DTL	DTL	910.282	TRUE	-4.39294	1.11827e-05	0.000461747	-2.18054	condition on vs pre
VEPH1	VEPH1	143.598	TRUE	-4.39292	1.11837e-05	0.000461747	-1.81864	condition on vs pre
ACOX1	ACOX1	14882	TRUE	4.39213	1.12246e-05	0.000462536	2.19752	condition on vs pre
CD1D	CD1D	386.113	TRUE	4.39223	1.12196e-05	0.000462536	2.64285	condition on vs pre
LPIN2	LPIN2	6622.44	TRUE	4.3896	1.13558e-05	0.000467032	2.25338	condition on vs pre
RNF2P1	RNF2P1	53.8959	TRUE	4.38966	1.1353e-05	0.000467032	2.49913	condition on vs pre
AURKB	AURKB	197.588	TRUE	-4.38876	1.13996e-05	0.000467926	-1.91465	condition on vs pre
SERTAD4-AS1	SERTAD4-AS1	57.5637	TRUE	-4.38895	1.139e-05	0.000467926	-2.26566	condition on vs pre
AC026362.2	AC026362.2	304.454	TRUE	4.38794	1.14431e-05	0.000469257	1.36242	condition on vs pre
NSUN6	NSUN6	1631.85	TRUE	4.38583	1.15543e-05	0.000473357	1.73907	condition on vs pre
STMN1	STMN1	2362.58	TRUE	-4.3853	1.15827e-05	0.000474061	-1.6754	condition on vs pre
AC011389.1	AC011389.1	69.4159	TRUE	-4.38363	1.16717e-05	0.000477245	-3.12747	condition on vs pre
INHBC	INHBC	2955.74	TRUE	4.38318	1.16957e-05	0.000477766	4.23153	condition on vs pre
AC009166.2	AC009166.2	91.1791	TRUE	4.3815	1.17865e-05	0.000481008	2.76126	condition on vs pre
CCNG1P1	CCNG1P1	71.68	TRUE	4.38087	1.18204e-05	0.000481068	3.49358	condition on vs pre
FXYD1	FXYD1	1402.43	TRUE	4.38118	1.18038e-05	0.000481068	3.72831	condition on vs pre
TEKT5	TEKT5	93.2012	TRUE	-4.38084	1.1822e-05	0.000481068	-1.77133	condition on vs pre
BMS1P10	BMS1P10	270.546	TRUE	4.3803	1.18514e-05	0.000481803	3.32975	condition on vs pre
LINC01370	LINC01370	208.666	TRUE	4.38001	1.18676e-05	0.000481999	4.22242	condition on vs pre
OGDHL	OGDHL	4249.94	TRUE	4.37888	1.19292e-05	0.000484036	3.79847	condition on vs pre
GABARAPL1	GABARAPL1	1932.63	TRUE	4.37603	1.20861e-05	0.000489934	2.12443	condition on vs pre
PKD1L3	PKD1L3	224.849	TRUE	4.37571	1.2104e-05	0.000490187	2.53335	condition on vs pre
NLRX1	NLRX1	793.461	TRUE	4.37484	1.21522e-05	0.000491673	1.24656	condition on vs pre
FAM20C	FAM20C	2173.4	TRUE	4.3739	1.22048e-05	0.000493329	1.73285	condition on vs pre
AL596087.1	AL596087.1	32.4283	TRUE	-4.37183	1.23208e-05	0.000497544	-3.84564	condition on vs pre
RASSF10	RASSF10	363.171	TRUE	-4.37105	1.23651e-05	0.000498854	-1.32336	condition on vs pre
AP003471.1	AP003471.1	555.895	TRUE	4.36998	1.24258e-05	0.000500825	3.69735	condition on vs pre
AZGP1P2	AZGP1P2	60.0159	TRUE	4.36899	1.24825e-05	0.000502633	3.56755	condition on vs pre
AC011199.1	AC011199.1	39.7361	TRUE	-4.36868	1.24998e-05	0.000502854	-2.60725	condition on vs pre
SLC13A3	SLC13A3	596.253	TRUE	4.36813	1.25316e-05	0.000503656	2.52659	condition on vs pre
HOXD9	HOXD9	79.9562	TRUE	-4.36683	1.26061e-05	0.000506168	-2.26566	condition on vs pre
TMEM176A	TMEM176A	8493.67	TRUE	4.36519	1.2701e-05	0.000509494	3.50516	condition on vs pre
AC010624.2	AC010624.2	18.9872	TRUE	-4.36457	1.27375e-05	0.000510477	-3.69217	condition on vs pre
RPL3P8	RPL3P8	39.2532	TRUE	-4.36427	1.27551e-05	0.000510697	-4.90387	condition on vs pre
FOXA3	FOXA3	492.728	TRUE	4.3625	1.28583e-05	0.000514342	3.5352	condition on vs pre
SLC25A25	SLC25A25	1662.59	TRUE	4.36157	1.2913e-05	0.000516046	2.02662	condition on vs pre
SEPT14P12	SEPT14P12	23.0803	TRUE	-4.35972	1.3023e-05	0.000519952	-2.98146	condition on vs pre
CTIF	CTIF	2326.9	TRUE	4.35912	1.30589e-05	0.000520892	1.43859	condition on vs pre
AC104964.4	AC104964.4	267.647	TRUE	4.35828	1.31089e-05	0.000522394	2.15947	condition on vs pre
MAD2L1	MAD2L1	527.518	TRUE	-4.35721	1.3173e-05	0.000523966	-1.84611	condition on vs pre
ZWINT	ZWINT	890.266	TRUE	-4.35734	1.31655e-05	0.000523966	-2.11764	condition on vs pre
ABAT	ABAT	13079.2	TRUE	4.35653	1.32142e-05	0.000525108	2.47856	condition on vs pre
CGB7	CGB7	84.915	TRUE	-4.35621	1.32335e-05	0.000525385	-1.92721	condition on vs pre
CRYAA	CRYAA	121.625	TRUE	4.35466	1.33271e-05	0.000528604	4.26019	condition on vs pre
AC137056.2	AC137056.2	661.179	TRUE	4.3534	1.3404e-05	0.000531158	4.00623	condition on vs pre
AF201337.1	AF201337.1	12.6447	TRUE	-4.35019	1.3602e-05	0.000538499	-4.84918	condition on vs pre
AC080038.4	AC080038.4	127.516	TRUE	-4.3493	1.36573e-05	0.000539682	-1.94513	condition on vs pre
DPYD-AS1	DPYD-AS1	81.6245	TRUE	4.34939	1.36515e-05	0.000539682	2.18399	condition on vs pre
PNMA6A	PNMA6A	185.871	TRUE	4.34869	1.36955e-05	0.000540683	2.61937	condition on vs pre
ACTA1	ACTA1	83.7551	TRUE	-4.3479	1.3745e-05	0.000542133	-1.9907	condition on vs pre
IRX6	IRX6	28.7606	TRUE	-4.34596	1.38669e-05	0.000546434	-3.6036	condition on vs pre
THNSL1	THNSL1	769.459	TRUE	4.34575	1.38799e-05	0.000546439	1.6015	condition on vs pre
KRT86	KRT86	64.1242	TRUE	-4.34452	1.39579e-05	0.000548996	-1.86801	condition on vs pre
AL158823.1	AL158823.1	22.4478	TRUE	4.3431	1.40484e-05	0.000552045	2.89807	condition on vs pre
AQP7P1	AQP7P1	72.5836	TRUE	4.34214	1.41101e-05	0.000553954	4.01659	condition on vs pre
DHRS3	DHRS3	4766.16	TRUE	4.34123	1.41687e-05	0.000555743	1.60856	condition on vs pre
AC009093.6	AC009093.6	77.3009	TRUE	4.34062	1.4208e-05	0.000556765	1.88855	condition on vs pre
MMUT	MMUT	4502.96	TRUE	4.3397	1.42677e-05	0.000558589	1.9388	condition on vs pre
GPR88	GPR88	380.35	TRUE	4.33885	1.43228e-05	0.000560229	3.12033	condition on vs pre
OR52E5	OR52E5	192.886	TRUE	-4.33748	1.44123e-05	0.00056321	-4.05748	condition on vs pre
INHBE	INHBE	2455.99	TRUE	4.33677	1.44592e-05	0.00056452	3.79136	condition on vs pre
TIAF1	TIAF1	634.73	TRUE	4.33654	1.44743e-05	0.00056459	1.42038	condition on vs pre
ABCC6P1	ABCC6P1	1309.4	TRUE	4.33617	1.44985e-05	0.000565017	3.23851	condition on vs pre
TP73	TP73	277.518	TRUE	-4.33534	1.45534e-05	0.000566634	-1.45005	condition on vs pre
ALDH6A1	ALDH6A1	20460.7	TRUE	4.33494	1.45797e-05	0.000567136	1.97836	condition on vs pre
PSRC1	PSRC1	210.163	TRUE	-4.33463	1.46007e-05	0.000567433	-1.64754	condition on vs pre
AP005060.1	AP005060.1	258.521	TRUE	4.33423	1.46269e-05	0.00056793	1.96582	condition on vs pre
CGNL1	CGNL1	5851.73	TRUE	4.33259	1.47363e-05	0.000571653	1.60188	condition on vs pre
RETSAT	RETSAT	4785.7	TRUE	4.331	1.48434e-05	0.000575281	1.3535	condition on vs pre
AL022722.1	AL022722.1	100.732	TRUE	4.33049	1.48781e-05	0.000576099	2.22098	condition on vs pre
AL161668.4	AL161668.4	97.6499	TRUE	4.3268	1.51293e-05	0.00058529	3.85908	condition on vs pre
BTG1P1	BTG1P1	33.5488	TRUE	4.32563	1.52093e-05	0.000587492	2.63888	condition on vs pre
PRR7	PRR7	191.948	TRUE	-4.32557	1.5214e-05	0.000587492	-1.9704	condition on vs pre
PARPBP	PARPBP	208.941	TRUE	-4.32523	1.52376e-05	0.000587867	-1.48451	condition on vs pre
CYP39A1	CYP39A1	1136.37	TRUE	4.32452	1.52864e-05	0.000589214	3.3505	condition on vs pre
SEC14L2	SEC14L2	5462.14	TRUE	4.32304	1.53896e-05	0.000592652	2.09599	condition on vs pre
MAOA	MAOA	4140.29	TRUE	4.32262	1.54187e-05	0.000593236	3.50366	condition on vs pre
HAO2	HAO2	3855.77	TRUE	4.32207	1.54574e-05	0.000594082	4.15449	condition on vs pre
SERBP1P6	SERBP1P6	137.937	TRUE	4.32191	1.54688e-05	0.000594082	2.19462	condition on vs pre
ALPL	ALPL	1455.66	TRUE	4.32042	1.55729e-05	0.000597541	2.47732	condition on vs pre
OR52N3P	OR52N3P	61.4403	TRUE	-4.31933	1.565e-05	0.000599955	-3.14524	condition on vs pre
OSBP	OSBP	4888.39	TRUE	4.31904	1.56708e-05	0.000600142	1.32511	condition on vs pre
RNF183	RNF183	68.9149	TRUE	-4.31887	1.56832e-05	0.000600142	-2.89198	condition on vs pre
AC007298.2	AC007298.2	51.5047	TRUE	4.3182	1.5731e-05	0.000601426	3.24969	condition on vs pre
ZFHX4	ZFHX4	2307.41	TRUE	4.31765	1.577e-05	0.000602373	2.25308	condition on vs pre
ACSS3	ACSS3	2819.3	TRUE	4.31715	1.58057e-05	0.000602651	1.67521	condition on vs pre
RDH5	RDH5	1208.87	TRUE	4.31718	1.58036e-05	0.000602651	2.197	condition on vs pre
HK2P1	HK2P1	24.7206	TRUE	-4.31596	1.5891e-05	0.000604983	-4.11325	condition on vs pre
TEC	TEC	311.405	TRUE	4.3159	1.58954e-05	0.000604983	1.70131	condition on vs pre
BAAT	BAAT	10839.4	TRUE	4.31525	1.59424e-05	0.000605682	4.03518	condition on vs pre
RPS4XP5	RPS4XP5	86.6351	TRUE	4.31539	1.59321e-05	0.000605682	2.02967	condition on vs pre
ALDH1L1-AS2	ALDH1L1-AS2	164.727	TRUE	4.31485	1.59709e-05	0.000606223	4.21923	condition on vs pre
ANGPTL6	ANGPTL6	342.619	TRUE	4.31388	1.60415e-05	0.000608358	3.00111	condition on vs pre
PDIA5	PDIA5	2250.2	TRUE	4.31293	1.61107e-05	0.000609887	1.6464	condition on vs pre
PHLDB3	PHLDB3	907.4	TRUE	4.31298	1.61069e-05	0.000609887	0.963357	condition on vs pre
TBC1D2B	TBC1D2B	4651.82	TRUE	4.31107	1.62466e-05	0.000614483	1.57188	condition on vs pre
TDRD15	TDRD15	190.783	TRUE	4.31055	1.62852e-05	0.000615393	3.123	condition on vs pre
SELENOM	SELENOM	4482.41	TRUE	-4.30802	1.64725e-05	0.000621919	-1.7225	condition on vs pre
XDH	XDH	4482.08	TRUE	4.30603	1.66213e-05	0.000626978	3.64234	condition on vs pre
NDRG2	NDRG2	5528.92	TRUE	4.30511	1.66904e-05	0.000629022	1.77688	condition on vs pre
COL11A1	COL11A1	597.061	TRUE	-4.30449	1.6737e-05	0.000630219	-3.82945	condition on vs pre
SERPINA4	SERPINA4	4883.48	TRUE	4.30409	1.67675e-05	0.000630806	3.84142	condition on vs pre
HSD17B4	HSD17B4	10176.8	TRUE	4.30082	1.70165e-05	0.000639608	1.22931	condition on vs pre
AGPAT3	AGPAT3	7108.64	TRUE	4.29892	1.71636e-05	0.000644562	1.39127	condition on vs pre
CCDC152	CCDC152	1615.49	TRUE	4.29322	1.76101e-05	0.000660745	2.56664	condition on vs pre
FAM133A	FAM133A	43.0497	TRUE	-4.29184	1.77195e-05	0.000663673	-3.15231	condition on vs pre
ZADH2	ZADH2	2101.07	TRUE	4.29199	1.77083e-05	0.000663673	1.27788	condition on vs pre
AC126614.1	AC126614.1	53.81	TRUE	4.28996	1.78702e-05	0.000668428	1.80977	condition on vs pre
NTM	NTM	408.331	TRUE	-4.28971	1.78907e-05	0.000668428	-2.5027	condition on vs pre
PID1	PID1	1137	TRUE	4.28967	1.78937e-05	0.000668428	3.26119	condition on vs pre
ARHGEF26	ARHGEF26	2189.5	TRUE	4.2892	1.79314e-05	0.000668813	1.70748	condition on vs pre
DLG5-AS1	DLG5-AS1	87.8041	TRUE	-4.28915	1.79356e-05	0.000668813	-1.81268	condition on vs pre
ELMO1	ELMO1	2169.96	TRUE	4.28878	1.79659e-05	0.000669351	1.42295	condition on vs pre
AC092118.1	AC092118.1	69.4257	TRUE	4.2882	1.80127e-05	0.000669916	2.39071	condition on vs pre
KYAT1	KYAT1	230.616	TRUE	4.28833	1.80021e-05	0.000669916	1.44884	condition on vs pre
C8B	C8B	12807.1	TRUE	4.28687	1.81209e-05	0.000673351	4.40076	condition on vs pre
HAO2-IT1	HAO2-IT1	24.5508	TRUE	4.286	1.81923e-05	0.00067541	4.11504	condition on vs pre
TMEM59L	TMEM59L	27.6444	TRUE	-4.28534	1.82463e-05	0.000676821	-2.81629	condition on vs pre
AC114812.3	AC114812.3	57.5673	TRUE	4.28504	1.82708e-05	0.000677139	3.68816	condition on vs pre
SLC44A3-AS1	SLC44A3-AS1	741.347	TRUE	-4.28444	1.83201e-05	0.000678373	-1.4323	condition on vs pre
DKK2	DKK2	94.3801	TRUE	-4.28185	1.85345e-05	0.000685711	-2.55955	condition on vs pre
AC009005.1	AC009005.1	98.7511	TRUE	-4.27816	1.88442e-05	0.000696561	-2.05432	condition on vs pre
CPS1	CPS1	58908.9	TRUE	4.27796	1.88617e-05	0.000696601	3.34311	condition on vs pre
GLYAT	GLYAT	3693.21	TRUE	4.27771	1.88825e-05	0.000696762	4.30697	condition on vs pre
AC022816.1	AC022816.1	154.441	TRUE	4.277	1.89431e-05	0.000698389	1.79043	condition on vs pre
YRDCP1	YRDCP1	57.9597	TRUE	4.27627	1.90049e-05	0.000700059	1.90411	condition on vs pre
KRT37	KRT37	29.5397	TRUE	-4.2751	1.91051e-05	0.000703138	-3.24097	condition on vs pre
SPON2	SPON2	1576.98	TRUE	4.27335	1.92555e-05	0.000708056	1.53835	condition on vs pre
FAM205BP	FAM205BP	28.0937	TRUE	-4.27281	1.93028e-05	0.000709182	-2.06319	condition on vs pre
PLPP3	PLPP3	4256.37	TRUE	4.2715	1.94167e-05	0.000712746	2.06047	condition on vs pre
AC107075.1	AC107075.1	29.9637	TRUE	4.2706	1.94951e-05	0.000715005	3.19235	condition on vs pre
LINC02475	LINC02475	65.2684	TRUE	-4.27033	1.95185e-05	0.000715246	-2.50792	condition on vs pre
HDAC6	HDAC6	4572.6	TRUE	4.2701	1.95382e-05	0.000715347	1.39747	condition on vs pre
SAMD4A	SAMD4A	2170.62	TRUE	4.26943	1.95969e-05	0.000716878	1.5245	condition on vs pre
SEC24AP1	SEC24AP1	228.239	TRUE	4.26884	1.96488e-05	0.000718156	2.68023	condition on vs pre
IVD	IVD	7591.35	TRUE	4.26684	1.98261e-05	0.000723387	1.49169	condition on vs pre
ZNF668	ZNF668	533.701	TRUE	-4.2669	1.98208e-05	0.000723387	-1.16337	condition on vs pre
GACAT3	GACAT3	30.5114	TRUE	-4.2648	2.00083e-05	0.000729407	-3.36695	condition on vs pre
NCAPG	NCAPG	525.691	TRUE	-4.26273	2.0194e-05	0.000735546	-2.02734	condition on vs pre
HPCAL4	HPCAL4	33.4473	TRUE	-4.2604	2.0406e-05	0.000742626	-2.69729	condition on vs pre
SCN9A	SCN9A	1495.21	TRUE	4.26014	2.04295e-05	0.000742845	1.56558	condition on vs pre
IGF1	IGF1	1558.24	TRUE	4.25936	2.05017e-05	0.000744831	3.23507	condition on vs pre
QPRT	QPRT	3325.29	TRUE	4.25829	2.05996e-05	0.000747107	2.25388	condition on vs pre
SOX5	SOX5	1601.71	TRUE	4.25834	2.05955e-05	0.000747107	3.02417	condition on vs pre
PCDHA3	PCDHA3	126.507	TRUE	-4.25769	2.06551e-05	0.000747876	-2.72655	condition on vs pre
SORBS3	SORBS3	1559.04	TRUE	4.25768	2.06561e-05	0.000747876	1.6191	condition on vs pre
AGTR1	AGTR1	981.128	TRUE	4.25694	2.07242e-05	0.000749698	3.4501	condition on vs pre
AC012501.2	AC012501.2	37.7228	TRUE	-4.25599	2.08123e-05	0.000752243	-3.67032	condition on vs pre
ACADVL	ACADVL	15176.8	TRUE	4.25565	2.08446e-05	0.000752768	1.9249	condition on vs pre
AP001065.1	AP001065.1	92.197	TRUE	4.25445	2.09563e-05	0.000756159	2.5432	condition on vs pre
CRIP3	CRIP3	284.12	TRUE	4.25224	2.11647e-05	0.000763027	2.99209	condition on vs pre
AL391669.1	AL391669.1	26.9649	TRUE	4.25142	2.12416e-05	0.000765148	2.23261	condition on vs pre
AC064862.3	AC064862.3	31.9938	TRUE	-4.25078	2.13031e-05	0.000766711	-4.04784	condition on vs pre
AP006285.2	AP006285.2	42.667	TRUE	4.25038	2.1341e-05	0.000767423	3.8314	condition on vs pre
PCAT6	PCAT6	108.618	TRUE	-4.2489	2.14826e-05	0.000771862	-2.07032	condition on vs pre
PAX1	PAX1	50.3064	TRUE	-4.2479	2.15781e-05	0.000774144	-2.94031	condition on vs pre
SPAG17	SPAG17	351.243	TRUE	-4.24786	2.15827e-05	0.000774144	-2.11565	condition on vs pre
CTH	CTH	896.407	TRUE	4.24674	2.16901e-05	0.000777338	2.50166	condition on vs pre
RAB17	RAB17	1977.61	TRUE	4.24598	2.17639e-05	0.000779326	1.5647	condition on vs pre
AL356473.1	AL356473.1	21.0018	TRUE	-4.24561	2.18004e-05	0.000779971	-5.39469	condition on vs pre
AKR1C6P	AKR1C6P	131.838	TRUE	4.24387	2.19697e-05	0.000784704	4.13448	condition on vs pre
POLRMT	POLRMT	2212.12	TRUE	4.24396	2.19614e-05	0.000784704	1.04127	condition on vs pre
KIF15	KIF15	409.332	TRUE	-4.24344	2.20121e-05	0.000785555	-2.03712	condition on vs pre
UGT2B7	UGT2B7	9431.32	TRUE	4.2419	2.21638e-05	0.000790302	4.12948	condition on vs pre
RF01293	RF01293	33.5127	TRUE	4.24157	2.21965e-05	0.000790803	2.46146	condition on vs pre
AC074134.1	AC074134.1	13.5963	TRUE	-4.24021	2.23311e-05	0.000794932	-3.85636	condition on vs pre
IL17B	IL17B	15.1333	TRUE	-4.23933	2.2419e-05	0.000797389	-3.74343	condition on vs pre
TFPI	TFPI	13601	TRUE	4.23909	2.24423e-05	0.000797548	2.45372	condition on vs pre
C19orf66	C19orf66	4313.53	TRUE	4.23856	2.24955e-05	0.000798291	1.18254	condition on vs pre
C2-AS1	C2-AS1	66.7963	TRUE	4.2384	2.2512e-05	0.000798291	2.51585	condition on vs pre
SLC6A10P	SLC6A10P	146.577	TRUE	-4.23832	2.25197e-05	0.000798291	-2.42821	condition on vs pre
AC016205.1	AC016205.1	37.9366	TRUE	-4.23722	2.26304e-05	0.000801543	-2.06496	condition on vs pre
AL391097.1	AL391097.1	59.4699	TRUE	4.23596	2.27575e-05	0.000804698	1.6395	condition on vs pre
FAM83D	FAM83D	630.027	TRUE	-4.23599	2.27549e-05	0.000804698	-2.20606	condition on vs pre
AC104964.3	AC104964.3	326.279	TRUE	4.2346	2.28954e-05	0.0008089	1.90479	condition on vs pre
PRG4	PRG4	3955.99	TRUE	4.23434	2.29229e-05	0.000809197	3.70512	condition on vs pre
FAM151A	FAM151A	212.497	TRUE	4.23396	2.29615e-05	0.000809885	2.98529	condition on vs pre
CPT2	CPT2	3505.11	TRUE	4.23375	2.29823e-05	0.000809943	1.42245	condition on vs pre
AC023593.1	AC023593.1	36.564	TRUE	-4.23331	2.30278e-05	0.000810872	-1.99221	condition on vs pre
CPOX	CPOX	881.444	TRUE	4.23307	2.30526e-05	0.000811073	1.44733	condition on vs pre
PLIN2	PLIN2	5433.39	TRUE	4.23092	2.32742e-05	0.00081819	1.78549	condition on vs pre
PYCR1	PYCR1	2103.38	TRUE	-4.23019	2.33495e-05	0.000820157	-1.91208	condition on vs pre
PHF19	PHF19	760.425	TRUE	-4.22947	2.34242e-05	0.000822098	-1.28837	condition on vs pre
OR10J6P	OR10J6P	416.965	TRUE	4.22898	2.34757e-05	0.000823225	3.90051	condition on vs pre
CDCA8	CDCA8	265.894	TRUE	-4.22786	2.35924e-05	0.000825786	-1.88668	condition on vs pre
FAM183A	FAM183A	19.8505	TRUE	-4.22784	2.3595e-05	0.000825786	-2.41709	condition on vs pre
HNRNPA1P73	HNRNPA1P73	35.4524	TRUE	-4.22772	2.36073e-05	0.000825786	-2.80841	condition on vs pre
HES6	HES6	170.647	TRUE	-4.22675	2.37091e-05	0.000828666	-1.39267	condition on vs pre
ARHGEF12	ARHGEF12	16337.3	TRUE	4.22645	2.37402e-05	0.000829068	1.11731	condition on vs pre
OTC	OTC	2066.26	TRUE	4.22392	2.40091e-05	0.000837768	4.27618	condition on vs pre
AMFR	AMFR	6877.34	TRUE	4.22277	2.41314e-05	0.00084134	1.21199	condition on vs pre
MPST	MPST	6979.63	TRUE	4.22199	2.42158e-05	0.000843591	2.07638	condition on vs pre
MMAA	MMAA	1016.03	TRUE	4.22089	2.43339e-05	0.000847006	1.34927	condition on vs pre
LINC01702	LINC01702	155.531	TRUE	4.22013	2.44165e-05	0.000849184	3.0465	condition on vs pre
KIAA1549L	KIAA1549L	154.309	TRUE	-4.21977	2.44556e-05	0.000849847	-2.94731	condition on vs pre
AC010200.2	AC010200.2	22.4057	TRUE	4.21881	2.45591e-05	0.000852743	3.81752	condition on vs pre
TNFRSF10D	TNFRSF10D	405.392	TRUE	4.21845	2.45987e-05	0.000853419	1.79906	condition on vs pre
AL391256.1	AL391256.1	23.4217	TRUE	-4.21676	2.47832e-05	0.000858416	-4.09554	condition on vs pre
AP001781.2	AP001781.2	14.7926	TRUE	-4.21691	2.47669e-05	0.000858416	-5.42457	condition on vs pre
MAOB	MAOB	4425.23	TRUE	4.21581	2.48883e-05	0.000861351	1.83882	condition on vs pre
DUSP27	DUSP27	78.5788	TRUE	-4.21558	2.49142e-05	0.000861542	-2.70188	condition on vs pre
AC025271.2	AC025271.2	48.3986	TRUE	4.21337	2.51584e-05	0.000869278	1.79997	condition on vs pre
RN7SL164P	RN7SL164P	13.7836	TRUE	-4.2128	2.52226e-05	0.000870787	-3.20059	condition on vs pre
AC022182.3	AC022182.3	42.8803	TRUE	-4.21024	2.55097e-05	0.000877837	-2.23882	condition on vs pre
AC130456.4	AC130456.4	30.2437	TRUE	-4.21044	2.5487e-05	0.000877837	-3.87035	condition on vs pre
GLRA4	GLRA4	29.2726	TRUE	-4.21076	2.54515e-05	0.000877837	-3.67662	condition on vs pre
HASPIN	HASPIN	127.809	TRUE	-4.21039	2.54925e-05	0.000877837	-1.7595	condition on vs pre
SPANXD	SPANXD	22.3199	TRUE	-4.2095	2.55939e-05	0.00088002	-4.15414	condition on vs pre
LRRC4C	LRRC4C	269.802	TRUE	-4.20929	2.5617e-05	0.000880097	-1.85754	condition on vs pre
CDC14B	CDC14B	2491.44	TRUE	4.20649	2.59367e-05	0.000890361	1.74515	condition on vs pre
HNF1A-AS1	HNF1A-AS1	2356.31	TRUE	4.20611	2.59799e-05	0.000891123	1.84732	condition on vs pre
AC005077.1	AC005077.1	65.2051	TRUE	4.20486	2.61239e-05	0.00089509	2.34476	condition on vs pre
RAPGEF2	RAPGEF2	3394.09	TRUE	4.20474	2.61379e-05	0.00089509	1.32856	condition on vs pre
CYP4F12	CYP4F12	1459.52	TRUE	4.20442	2.61748e-05	0.000895632	3.46961	condition on vs pre
LINC01558	LINC01558	248.849	TRUE	4.20349	2.62831e-05	0.000898612	2.09082	condition on vs pre
AC105910.1	AC105910.1	52.1228	TRUE	4.2028	2.63633e-05	0.000900627	3.30803	condition on vs pre
ATP11C	ATP11C	2583.55	TRUE	4.20196	2.64619e-05	0.000901813	1.95407	condition on vs pre
ATP2A1-AS1	ATP2A1-AS1	44.1897	TRUE	-4.20198	2.64596e-05	0.000901813	-2.20866	condition on vs pre
LINC02532	LINC02532	1952.6	TRUE	4.20218	2.64362e-05	0.000901813	3.33136	condition on vs pre
SLC25A20	SLC25A20	1980.08	TRUE	4.2008	2.65978e-05	0.000905716	2.33426	condition on vs pre
BPIFB2	BPIFB2	664.421	TRUE	-4.19853	2.68648e-05	0.000913337	-3.07792	condition on vs pre
NACAD	NACAD	99.6454	TRUE	-4.19868	2.68474e-05	0.000913337	-2.04529	condition on vs pre
DSCC1	DSCC1	198.193	TRUE	-4.19823	2.69014e-05	0.000913848	-1.51214	condition on vs pre
PLP2	PLP2	916.542	TRUE	-4.19726	2.7016e-05	0.000917007	-1.55308	condition on vs pre
ARNTL	ARNTL	1401.03	TRUE	4.19599	2.71685e-05	0.000921446	1.06318	condition on vs pre
UPK1A	UPK1A	36.2796	TRUE	-4.19573	2.71989e-05	0.000921737	-4.25719	condition on vs pre
KRTAP4-8	KRTAP4-8	28.179	TRUE	-4.19536	2.72442e-05	0.000922537	-3.84311	condition on vs pre
PCYT2	PCYT2	2979.28	TRUE	4.1947	2.73235e-05	0.000924267	1.88185	condition on vs pre
SHISA2	SHISA2	393.704	TRUE	-4.19457	2.7339e-05	0.000924267	-3.93079	condition on vs pre
AGMO	AGMO	1543.07	TRUE	4.19259	2.75792e-05	0.000931645	3.56592	condition on vs pre
E2F8	E2F8	199.938	TRUE	-4.18987	2.79112e-05	0.000942109	-2.14701	condition on vs pre
AL392023.2	AL392023.2	341.232	TRUE	-4.18916	2.79993e-05	0.00094358	-1.64682	condition on vs pre
BX547991.1	BX547991.1	87.4471	TRUE	4.18932	2.79797e-05	0.00094358	3.43529	condition on vs pre
CORO6	CORO6	139.293	TRUE	-4.187	2.82668e-05	0.000951838	-1.57902	condition on vs pre
DIAPH2	DIAPH2	2140.45	TRUE	4.18614	2.83733e-05	0.000954662	1.78323	condition on vs pre
SPEF1	SPEF1	110.705	TRUE	-4.18567	2.84331e-05	0.000955409	-1.91351	condition on vs pre
TTC7B	TTC7B	1493.78	TRUE	4.18561	2.84406e-05	0.000955409	1.31724	condition on vs pre
NUCB1	NUCB1	7159.7	TRUE	4.18344	2.87129e-05	0.000963794	1.55734	condition on vs pre
C4BPA	C4BPA	20048	TRUE	4.18307	2.87602e-05	0.000964617	4.34443	condition on vs pre
LRG1	LRG1	14604.4	TRUE	4.18233	2.88532e-05	0.000966969	2.69367	condition on vs pre
AC091117.2	AC091117.2	18.1246	TRUE	4.18141	2.89712e-05	0.000969522	2.73566	condition on vs pre
EPHX2	EPHX2	5415.52	TRUE	4.18138	2.89751e-05	0.000969522	2.26865	condition on vs pre
CKMT2	CKMT2	330	TRUE	4.181	2.90233e-05	0.000970367	1.21857	condition on vs pre
RDX	RDX	2865.3	TRUE	4.18039	2.91007e-05	0.000972188	1.25367	condition on vs pre
KRT80	KRT80	529.336	TRUE	-4.17973	2.91858e-05	0.000974262	-2.89791	condition on vs pre
CCDC198	CCDC198	806.105	TRUE	4.17856	2.93364e-05	0.00097852	2.09198	condition on vs pre
APOM	APOM	2755.08	TRUE	4.17796	2.94141e-05	0.000980337	3.52788	condition on vs pre
FN3K	FN3K	1098.52	TRUE	4.17724	2.95062e-05	0.000981906	1.15652	condition on vs pre
SP8	SP8	31.8655	TRUE	-4.17723	2.95075e-05	0.000981906	-3.6475	condition on vs pre
PHETA1	PHETA1	435.126	TRUE	4.17582	2.9691e-05	0.000987239	1.30234	condition on vs pre
CTSO	CTSO	1958.1	TRUE	4.17547	2.97375e-05	0.000988008	1.92698	condition on vs pre
AL096829.1	AL096829.1	33.6078	TRUE	-4.17298	3.00637e-05	0.000998064	-2.8935	condition on vs pre
EIF4E1B	EIF4E1B	65.706	TRUE	-4.17217	3.01715e-05	0.00100086	-4.11999	condition on vs pre
HOXD-AS2	HOXD-AS2	107.394	TRUE	-4.17179	3.0221e-05	0.00100171	-3.17908	condition on vs pre
DIRAS1	DIRAS1	118.655	TRUE	-4.1715	3.02606e-05	0.00100224	-2.48127	condition on vs pre
KLHL21	KLHL21	2059.85	TRUE	4.17032	3.04168e-05	0.00100663	1.1524	condition on vs pre
FIRRE	FIRRE	454.128	TRUE	-4.16982	3.04838e-05	0.00100806	-1.49173	condition on vs pre
AC007012.2	AC007012.2	26.7146	TRUE	-4.16949	3.05278e-05	0.00100873	-4.01546	condition on vs pre
CYP2J2	CYP2J2	2397.47	TRUE	4.16878	3.06234e-05	0.00100952	2.82321	condition on vs pre
RPL23AP57	RPL23AP57	27.0449	TRUE	4.16901	3.05931e-05	0.00100952	4.23907	condition on vs pre
SYNGR3	SYNGR3	136.181	TRUE	-4.16892	3.06048e-05	0.00100952	-2.49394	condition on vs pre
LINC01929	LINC01929	18.1034	TRUE	-4.16786	3.07471e-05	0.00101281	-3.39145	condition on vs pre
OIT3	OIT3	1372.81	TRUE	4.16616	3.09769e-05	0.00101959	3.80389	condition on vs pre
RRN3P1	RRN3P1	850.649	TRUE	4.16509	3.11232e-05	0.00102361	1.37151	condition on vs pre
CHI3L2	CHI3L2	576.959	TRUE	-4.16397	3.12767e-05	0.00102786	-2.53694	condition on vs pre
AC016026.1	AC016026.1	906.638	TRUE	4.16368	3.13157e-05	0.00102835	2.12697	condition on vs pre
CLEC4G	CLEC4G	668.562	TRUE	4.16344	3.13486e-05	0.00102863	4.22291	condition on vs pre
AC104170.1	AC104170.1	70.6169	TRUE	4.16164	3.15976e-05	0.001036	2.59985	condition on vs pre
AL353718.1	AL353718.1	46.2976	TRUE	4.16055	3.17476e-05	0.00103789	4.20268	condition on vs pre
GNAZ	GNAZ	313.232	TRUE	-4.16051	3.17533e-05	0.00103789	-2.26878	condition on vs pre
LIMS2	LIMS2	873.913	TRUE	4.16058	3.1744e-05	0.00103789	1.97328	condition on vs pre
SLC6A12	SLC6A12	1439.52	TRUE	4.16098	3.1689e-05	0.00103789	3.14252	condition on vs pre
APOC1	APOC1	50706.1	TRUE	4.16014	3.18056e-05	0.0010388	3.52631	condition on vs pre
ATP13A3	ATP13A3	8797.98	TRUE	4.15988	3.18422e-05	0.00103919	1.49685	condition on vs pre
C6orf223	C6orf223	81.0953	TRUE	-4.15914	3.19447e-05	0.00104173	-2.13691	condition on vs pre
AC091614.2	AC091614.2	20.106	TRUE	4.1586	3.20209e-05	0.00104341	3.3665	condition on vs pre
NID1	NID1	5180.15	TRUE	4.15808	3.20935e-05	0.00104465	1.93262	condition on vs pre
TKFC	TKFC	4964.23	TRUE	4.15798	3.2108e-05	0.00104465	1.87312	condition on vs pre
CLCNKB	CLCNKB	13.5234	TRUE	-4.15756	3.2167e-05	0.00104576	-3.58848	condition on vs pre
LINC02620	LINC02620	36.806	TRUE	-4.15586	3.24063e-05	0.00105273	-4.19581	condition on vs pre
AC008750.5	AC008750.5	31.2917	TRUE	4.15513	3.25106e-05	0.00105291	2.15397	condition on vs pre
ENTPD3	ENTPD3	328.037	TRUE	-4.15515	3.25068e-05	0.00105291	-1.46422	condition on vs pre
GOT1	GOT1	3675.8	TRUE	4.15512	3.25113e-05	0.00105291	2.01991	condition on vs pre
MYO7A	MYO7A	1723.12	TRUE	4.15565	3.24371e-05	0.00105291	2.16912	condition on vs pre
MT1F	MT1F	1835.1	TRUE	4.15403	3.26667e-05	0.00105714	3.4264	condition on vs pre
NR3C2	NR3C2	1155.89	TRUE	4.15363	3.27248e-05	0.00105821	2.20414	condition on vs pre
KIFC1	KIFC1	573.449	TRUE	-4.15225	3.29225e-05	0.00106298	-1.98201	condition on vs pre
LIN7A	LIN7A	1090.79	TRUE	4.15226	3.29208e-05	0.00106298	2.14325	condition on vs pre
ARHGEF40	ARHGEF40	3792.65	TRUE	4.151	3.31028e-05	0.00106799	1.44584	condition on vs pre
PLEKHB1	PLEKHB1	464.553	TRUE	-4.15013	3.32287e-05	0.00107123	-2.20721	condition on vs pre
KIF3C	KIF3C	357.669	TRUE	-4.1494	3.33355e-05	0.00107386	-1.28804	condition on vs pre
NAPRT	NAPRT	2643.28	TRUE	4.14881	3.34208e-05	0.00107579	1.93794	condition on vs pre
MMACHC	MMACHC	1627.24	TRUE	4.1482	3.35097e-05	0.00107783	1.35759	condition on vs pre
LINC01132	LINC01132	149.942	TRUE	-4.14755	3.36054e-05	0.00108009	-2.07321	condition on vs pre
LAMC2	LAMC2	613.999	TRUE	-4.14592	3.38457e-05	0.00108699	-1.95617	condition on vs pre
ATOH8	ATOH8	866.289	TRUE	4.14524	3.39463e-05	0.00108866	2.90898	condition on vs pre
GHRHR	GHRHR	26.9266	TRUE	-4.14522	3.39491e-05	0.00108866	-2.78017	condition on vs pre
RNU1-70P	RNU1-70P	448.217	TRUE	4.14438	3.40733e-05	0.00109181	4.14177	condition on vs pre
BRSK1	BRSK1	300.964	TRUE	-4.14365	3.41818e-05	0.00109248	-2.69896	condition on vs pre
EWSAT1	EWSAT1	206.444	TRUE	-4.14405	3.41222e-05	0.00109248	-2.19348	condition on vs pre
GDF7	GDF7	998.627	TRUE	4.14355	3.41971e-05	0.00109248	2.24352	condition on vs pre
SHC2	SHC2	1580.6	TRUE	4.14369	3.41764e-05	0.00109248	1.87754	condition on vs pre
FGL1	FGL1	20636.3	TRUE	4.14308	3.42671e-05	0.00109389	4.3156	condition on vs pre
IGFBP4	IGFBP4	18877.8	TRUE	4.14207	3.4419e-05	0.00109791	2.05387	condition on vs pre
TNP2	TNP2	45.1684	TRUE	-4.14136	3.4525e-05	0.00110046	-3.14618	condition on vs pre
APOOL	APOOL	1510.3	TRUE	4.14108	3.45675e-05	0.00110099	0.926254	condition on vs pre
IL1R1	IL1R1	5919.01	TRUE	4.1403	3.46846e-05	0.00110389	1.88896	condition on vs pre
WDR59	WDR59	2322.81	TRUE	4.13916	3.48581e-05	0.00110858	1.00781	condition on vs pre
TRPV1	TRPV1	1795.85	TRUE	4.1381	3.50193e-05	0.00111287	1.37477	condition on vs pre
AC114811.2	AC114811.2	115.53	TRUE	-4.13745	3.51185e-05	0.00111435	-2.00915	condition on vs pre
KRT18P28	KRT18P28	15.7842	TRUE	-4.13758	3.50993e-05	0.00111435	-4.62074	condition on vs pre
AC007098.1	AC007098.1	115.264	TRUE	4.13715	3.51645e-05	0.00111497	1.61849	condition on vs pre
PTP4A1	PTP4A1	4254.58	TRUE	4.13644	3.52733e-05	0.00111752	1.9453	condition on vs pre
SORL1	SORL1	20701.6	TRUE	4.13628	3.52975e-05	0.00111752	1.44781	condition on vs pre
AL359715.3	AL359715.3	110.548	TRUE	4.13521	3.54624e-05	0.00112065	1.6288	condition on vs pre
LINC00659	LINC00659	50.3903	TRUE	4.13524	3.54581e-05	0.00112065	3.32812	condition on vs pre
LRFN2	LRFN2	53.5681	TRUE	-4.13513	3.54757e-05	0.00112065	-2.44564	condition on vs pre
PHLDA2	PHLDA2	118.527	TRUE	-4.13451	3.55714e-05	0.00112283	-2.5326	condition on vs pre
CCR3	CCR3	35.0805	TRUE	-4.13416	3.56256e-05	0.00112355	-2.44981	condition on vs pre
KCNH2	KCNH2	99.0114	TRUE	-4.13402	3.5647e-05	0.00112355	-2.18314	condition on vs pre
GSTA1	GSTA1	15886.8	TRUE	4.13343	3.5739e-05	0.00112561	5.17651	condition on vs pre
TNFSF14	TNFSF14	1826.5	TRUE	4.13279	3.58387e-05	0.00112791	1.69338	condition on vs pre
NDP	NDP	127.255	TRUE	-4.1317	3.60087e-05	0.00113242	-4.41643	condition on vs pre
DMP1	DMP1	30.2181	TRUE	-4.13133	3.60674e-05	0.00113342	-2.71449	condition on vs pre
AC012085.2	AC012085.2	267.654	TRUE	4.12986	3.62985e-05	0.00113984	1.52358	condition on vs pre
HPGD	HPGD	1416.25	TRUE	4.12967	3.6329e-05	0.00113995	3.36717	condition on vs pre
RPS4XP18	RPS4XP18	25.6966	TRUE	4.1291	3.64184e-05	0.00114191	3.25771	condition on vs pre
AL139161.2	AL139161.2	63.2543	TRUE	4.12745	3.66809e-05	0.00114844	2.98557	condition on vs pre
TTC21B	TTC21B	1555.51	TRUE	4.1276	3.66576e-05	0.00114844	1.21649	condition on vs pre
H2BFM	H2BFM	53.9238	TRUE	-4.12724	3.67142e-05	0.00114863	-2.26677	condition on vs pre
CYP4F2	CYP4F2	3972.37	TRUE	4.12695	3.67604e-05	0.00114923	4.02043	condition on vs pre
KIF11	KIF11	832.581	TRUE	-4.12532	3.70223e-05	0.00115656	-1.59912	condition on vs pre
PPP1R1A	PPP1R1A	1368.81	TRUE	4.12464	3.71321e-05	0.00115914	2.66302	condition on vs pre
C2CD4C	C2CD4C	66.0395	TRUE	-4.12189	3.75776e-05	0.0011694	-1.70192	condition on vs pre
CENPE	CENPE	710.927	TRUE	-4.12202	3.75563e-05	0.0011694	-1.92327	condition on vs pre
ESRP2	ESRP2	3172.9	TRUE	4.12176	3.75989e-05	0.0011694	1.3284	condition on vs pre
MBD3L3	MBD3L3	18.5475	TRUE	-4.1221	3.75427e-05	0.0011694	-5.34004	condition on vs pre
NEUROG1	NEUROG1	24.0734	TRUE	-4.12217	3.75318e-05	0.0011694	-4.23693	condition on vs pre
PA2G4P4	PA2G4P4	254.518	TRUE	4.12041	3.78191e-05	0.00117539	1.45442	condition on vs pre
GPR87	GPR87	32.9274	TRUE	-4.11914	3.80285e-05	0.00118103	-2.49907	condition on vs pre
AC137056.1	AC137056.1	82.7217	TRUE	4.11868	3.81057e-05	0.00118256	3.87898	condition on vs pre
AC083837.1	AC083837.1	632.113	TRUE	4.11824	3.8178e-05	0.00118394	1.44952	condition on vs pre
ENPP7	ENPP7	256.546	TRUE	4.11715	3.83579e-05	0.00118778	2.4579	condition on vs pre
ST3GAL6	ST3GAL6	1062.43	TRUE	4.11717	3.8355e-05	0.00118778	2.09583	condition on vs pre
LINC02575	LINC02575	58.9421	TRUE	4.11586	3.85744e-05	0.00119361	2.98952	condition on vs pre
FHL2	FHL2	2530.29	TRUE	-4.11428	3.88383e-05	0.0012009	-1.82066	condition on vs pre
FAM83G	FAM83G	1797.66	TRUE	4.11365	3.89457e-05	0.00120334	1.50807	condition on vs pre
AL590714.1	AL590714.1	125.763	TRUE	-4.11299	3.90569e-05	0.00120502	-1.89013	condition on vs pre
LGR4	LGR4	2892.09	TRUE	4.11311	3.90371e-05	0.00120502	1.88074	condition on vs pre
STS	STS	1246.21	TRUE	4.11103	3.93898e-05	0.0012144	1.50294	condition on vs pre
AC009974.2	AC009974.2	140.153	TRUE	4.11033	3.95094e-05	0.00121721	1.90707	condition on vs pre
CCDC68	CCDC68	445.447	TRUE	4.10956	3.96413e-05	0.00121963	1.89972	condition on vs pre
DLGAP5	DLGAP5	329.615	TRUE	-4.10953	3.96458e-05	0.00121963	-2.27992	condition on vs pre
LINC02473	LINC02473	80.1745	TRUE	-4.10811	3.98908e-05	0.00122628	-2.23239	condition on vs pre
NANOGP4	NANOGP4	134.741	TRUE	4.10713	4.00614e-05	0.00123063	2.10702	condition on vs pre
NDFIP1P1	NDFIP1P1	33.0067	TRUE	4.1065	4.01696e-05	0.00123306	3.17826	condition on vs pre
DPYD-AS2	DPYD-AS2	70.1129	TRUE	4.10621	4.0221e-05	0.00123374	2.01693	condition on vs pre
AMACR	AMACR	2621.53	TRUE	4.1053	4.03789e-05	0.00123769	2.12148	condition on vs pre
RPL7AP6	RPL7AP6	59.9997	TRUE	4.10414	4.05824e-05	0.00124303	3.11623	condition on vs pre
AC092134.1	AC092134.1	22.4612	TRUE	4.10356	4.06839e-05	0.00124386	2.69824	condition on vs pre
AL031777.1	AL031777.1	19.7719	TRUE	-4.10315	4.07561e-05	0.00124386	-2.44651	condition on vs pre
ESRRA	ESRRA	1603.66	TRUE	4.10324	4.07404e-05	0.00124386	1.30135	condition on vs pre
OR2W6P	OR2W6P	24.7363	TRUE	-4.10348	4.06985e-05	0.00124386	-3.08257	condition on vs pre
PEMT	PEMT	1905.05	TRUE	4.10374	4.06522e-05	0.00124386	2.46044	condition on vs pre
DUSP15	DUSP15	78.9356	TRUE	-4.10276	4.08252e-05	0.00124417	-1.60247	condition on vs pre
FUBP3	FUBP3	2124.21	TRUE	4.10289	4.08022e-05	0.00124417	1.14574	condition on vs pre
ALDH1A1	ALDH1A1	13354.4	TRUE	4.10174	4.10057e-05	0.00124877	3.02879	condition on vs pre
CCDC110	CCDC110	126.509	TRUE	-4.09982	4.1348e-05	0.00125829	-1.52544	condition on vs pre
TMED5	TMED5	4089.73	TRUE	4.09876	4.15361e-05	0.00126311	1.16832	condition on vs pre
RAB25	RAB25	2211.87	TRUE	-4.09823	4.16313e-05	0.0012651	-1.71227	condition on vs pre
PYCARD	PYCARD	2408.29	TRUE	-4.09523	4.21742e-05	0.00128067	-1.75669	condition on vs pre
PAX2	PAX2	75.6274	TRUE	-4.09483	4.22487e-05	0.00128202	-2.65579	condition on vs pre
CENPH	CENPH	331.944	TRUE	-4.09231	4.27098e-05	0.00129416	-1.36701	condition on vs pre
LINC01485	LINC01485	291.195	TRUE	4.09232	4.27085e-05	0.00129416	3.22118	condition on vs pre
ARHGAP40	ARHGAP40	113.789	TRUE	-4.09	4.31371e-05	0.00130617	-4.11356	condition on vs pre
KRTAP12-2	KRTAP12-2	14.7059	TRUE	-4.08774	4.35599e-05	0.00131803	-3.95251	condition on vs pre
CNTNAP3P2	CNTNAP3P2	96.2951	TRUE	4.08619	4.38514e-05	0.0013259	4.14993	condition on vs pre
ACKR2	ACKR2	538.569	TRUE	4.08576	4.39325e-05	0.00132741	1.83221	condition on vs pre
IGFBP3	IGFBP3	5857.2	TRUE	4.08523	4.40329e-05	0.00132949	1.88711	condition on vs pre
MTCO3P4	MTCO3P4	12.3914	TRUE	-4.08451	4.41704e-05	0.00133269	-4.12829	condition on vs pre
CENPI	CENPI	273.301	TRUE	-4.08394	4.42781e-05	0.00133457	-1.57762	condition on vs pre
SERPINF2	SERPINF2	24779.8	TRUE	4.08385	4.42956e-05	0.00133457	5.12852	condition on vs pre
NAT8	NAT8	571.01	TRUE	4.08331	4.4398e-05	0.0013367	2.95872	condition on vs pre
MASP1	MASP1	6233.88	TRUE	4.08285	4.44865e-05	0.00133842	3.58697	condition on vs pre
HOXC13-AS	HOXC13-AS	57.8711	TRUE	-4.0814	4.47646e-05	0.00134583	-2.31802	condition on vs pre
HAGLR	HAGLR	179.176	TRUE	-4.0809	4.48622e-05	0.00134781	-2.59684	condition on vs pre
PTPRD	PTPRD	1078.85	TRUE	4.08069	4.49017e-05	0.00134804	2.58201	condition on vs pre
LONP2	LONP2	12502.2	TRUE	4.08043	4.49528e-05	0.00134862	1.5592	condition on vs pre
AKR1C3	AKR1C3	2020.32	TRUE	4.07505	4.60042e-05	0.00137918	2.36855	condition on vs pre
OAZ3	OAZ3	649.537	TRUE	-4.07129	4.67544e-05	0.00140068	-1.78446	condition on vs pre
ATP5MC1P4	ATP5MC1P4	19.1335	TRUE	-4.07017	4.69784e-05	0.0014064	-2.62928	condition on vs pre
MAFG-DT	MAFG-DT	140.112	TRUE	-4.0699	4.70341e-05	0.00140707	-1.72506	condition on vs pre
AC009093.10	AC009093.10	159.643	TRUE	4.06956	4.71012e-05	0.00140808	1.94639	condition on vs pre
SMIM24	SMIM24	107.672	TRUE	4.0678	4.74598e-05	0.0014178	3.93023	condition on vs pre
KIF18B	KIF18B	872.632	TRUE	-4.06722	4.75774e-05	0.0014202	-1.2231	condition on vs pre
OR56B1	OR56B1	80.4415	TRUE	-4.06707	4.7607e-05	0.0014202	-2.21459	condition on vs pre
SALL1	SALL1	1366.38	TRUE	4.06688	4.76472e-05	0.00142039	3.93401	condition on vs pre
AP000769.3	AP000769.3	21.1444	TRUE	-4.06641	4.77422e-05	0.00142223	-3.78823	condition on vs pre
SCP2	SCP2	11832.5	TRUE	4.06617	4.77923e-05	0.00142272	1.74286	condition on vs pre
CXCL17	CXCL17	110.078	TRUE	-4.06572	4.78834e-05	0.00142443	-2.55673	condition on vs pre
MTCYBP12	MTCYBP12	12.4816	TRUE	-4.06471	4.80922e-05	0.00142964	-4.54209	condition on vs pre
PES1P2	PES1P2	21.6237	TRUE	-4.06332	4.83801e-05	0.00143719	-3.73555	condition on vs pre
CKMT1A	CKMT1A	446.851	TRUE	-4.06304	4.84376e-05	0.00143789	-2.74262	condition on vs pre
AL022313.2	AL022313.2	11.4	TRUE	-4.06118	4.88255e-05	0.00144839	-3.26216	condition on vs pre
FAM71F1	FAM71F1	51.0842	TRUE	-4.05964	4.91484e-05	0.00145695	-2.39446	condition on vs pre
NEK2	NEK2	832.853	TRUE	-4.05866	4.93543e-05	0.00146203	-1.85268	condition on vs pre
SLC38A10	SLC38A10	7203.48	TRUE	4.05848	4.93929e-05	0.00146215	1.45158	condition on vs pre
EXTL1	EXTL1	75.2581	TRUE	-4.05714	4.96782e-05	0.00146957	-2.52384	condition on vs pre
RPL21P23	RPL21P23	27.7057	TRUE	4.05679	4.97528e-05	0.00147075	2.23379	condition on vs pre
AC112721.2	AC112721.2	25.1729	TRUE	-4.05474	5.01893e-05	0.00148158	-3.49776	condition on vs pre
RPS2P46	RPS2P46	52.5323	TRUE	-4.05489	5.01585e-05	0.00148158	-3.1981	condition on vs pre
PCOLCE2	PCOLCE2	265.462	TRUE	4.05453	5.02355e-05	0.00148191	2.71791	condition on vs pre
AC010307.4	AC010307.4	10.3662	TRUE	-4.05283	5.06014e-05	0.00149063	-4.27043	condition on vs pre
AC010608.3	AC010608.3	13.942	TRUE	-4.05297	5.0571e-05	0.00149063	-4.53419	condition on vs pre
AP000356.2	AP000356.2	275.452	TRUE	-4.05082	5.10394e-05	0.00150249	-1.24763	condition on vs pre
ACBD4	ACBD4	2265.25	TRUE	4.05062	5.10829e-05	0.00150272	1.69752	condition on vs pre
AC005592.1	AC005592.1	24.8562	TRUE	-4.0502	5.11746e-05	0.00150412	-3.25629	condition on vs pre
RGPD3	RGPD3	237.931	TRUE	4.05007	5.12013e-05	0.00150412	2.08774	condition on vs pre
PDZD8	PDZD8	4303.34	TRUE	4.04958	5.13101e-05	0.00150627	1.38952	condition on vs pre
NNMT	NNMT	8511.34	TRUE	4.04857	5.15312e-05	0.00151171	3.21759	condition on vs pre
OXCT1-AS1	OXCT1-AS1	48.1099	TRUE	-4.04791	5.16772e-05	0.00151495	-1.92096	condition on vs pre
AC027237.3	AC027237.3	91.042	TRUE	-4.04643	5.20042e-05	0.00152243	-2.13314	condition on vs pre
CDO1	CDO1	4075.03	TRUE	4.04656	5.19761e-05	0.00152243	3.83934	condition on vs pre
MET	MET	3686.97	TRUE	4.0456	5.21901e-05	0.00152681	3.10561	condition on vs pre
LINC01931	LINC01931	59.7414	TRUE	4.04534	5.22481e-05	0.00152746	2.59838	condition on vs pre
LINC02160	LINC02160	14.8115	TRUE	4.04481	5.23659e-05	0.00152984	4.37845	condition on vs pre
FAM184A	FAM184A	412.983	TRUE	4.04327	5.27105e-05	0.00153885	1.76463	condition on vs pre
AC092810.1	AC092810.1	23.255	TRUE	-4.04205	5.29867e-05	0.00154094	-4.05405	condition on vs pre
AC244100.3	AC244100.3	219.011	TRUE	4.04224	5.29428e-05	0.00154094	3.67886	condition on vs pre
ICAM5	ICAM5	85.588	TRUE	-4.04238	5.29124e-05	0.00154094	-1.95265	condition on vs pre
MS4A15	MS4A15	47.1631	TRUE	-4.04238	5.29125e-05	0.00154094	-3.14905	condition on vs pre
SLC17A3	SLC17A3	325.771	TRUE	4.0422	5.29518e-05	0.00154094	3.88559	condition on vs pre
UGT1A9	UGT1A9	1824.9	TRUE	4.04199	5.30003e-05	0.00154094	4.06721	condition on vs pre
AL158212.5	AL158212.5	221.199	TRUE	4.04088	5.32508e-05	0.00154716	1.6734	condition on vs pre
AC108472.1	AC108472.1	116.922	TRUE	4.04058	5.33182e-05	0.00154805	1.97374	condition on vs pre
PLA2G12B	PLA2G12B	703.752	TRUE	4.03893	5.3695e-05	0.00155793	3.8753	condition on vs pre
ACOX2	ACOX2	4685.44	TRUE	4.0386	5.37718e-05	0.00155909	2.06099	condition on vs pre
FBP1	FBP1	9231.95	TRUE	4.03614	5.43371e-05	0.0015744	2.64472	condition on vs pre
TPRG1-AS2	TPRG1-AS2	18.8433	TRUE	4.03564	5.44537e-05	0.0015767	2.65108	condition on vs pre
AL512625.3	AL512625.3	218.74	TRUE	-4.03541	5.45076e-05	0.00157718	-1.44683	condition on vs pre
CCDC153	CCDC153	77.8957	TRUE	-4.03396	5.48443e-05	0.00158584	-1.66022	condition on vs pre
CDIP1	CDIP1	683.934	TRUE	4.03141	5.54426e-05	0.00160205	1.06962	condition on vs pre
LYZL2	LYZL2	13.1227	TRUE	-4.03035	5.56934e-05	0.0016082	-3.66101	condition on vs pre
AC099786.2	AC099786.2	10.8691	TRUE	-4.02963	5.58655e-05	0.00161159	-4.49001	condition on vs pre
VWA8	VWA8	3984.92	TRUE	4.02954	5.58868e-05	0.00161159	1.22197	condition on vs pre
GLT1D1	GLT1D1	478.328	TRUE	4.02908	5.59949e-05	0.00161361	3.16082	condition on vs pre
PTPRH	PTPRH	496.574	TRUE	4.02884	5.60517e-05	0.00161414	2.72866	condition on vs pre
ARID4A	ARID4A	1969.39	TRUE	4.02819	5.62077e-05	0.00161754	1.13698	condition on vs pre
RAB43	RAB43	2862.61	TRUE	4.02701	5.64906e-05	0.00162458	1.4717	condition on vs pre
C17orf100	C17orf100	214.187	TRUE	4.02671	5.65635e-05	0.00162557	1.94155	condition on vs pre
AC004832.5	AC004832.5	95.1806	TRUE	4.02508	5.69548e-05	0.0016357	1.87635	condition on vs pre
AC008622.2	AC008622.2	57.8269	TRUE	-4.02387	5.72485e-05	0.00164303	-2.35997	condition on vs pre
AC241584.2	AC241584.2	290.825	TRUE	4.02302	5.74563e-05	0.00164787	4.04071	condition on vs pre
GPR3	GPR3	33.507	TRUE	-4.02124	5.78914e-05	0.00165923	-2.06129	condition on vs pre
SAMM50P1	SAMM50P1	52.2632	TRUE	4.01988	5.82274e-05	0.00166773	2.28519	condition on vs pre
HIST2H2AB	HIST2H2AB	3183.92	TRUE	-4.01889	5.84738e-05	0.00167365	-2.17058	condition on vs pre
OR11L1	OR11L1	24.2466	TRUE	-4.01743	5.88358e-05	0.00168174	-3.14898	condition on vs pre
PADI1	PADI1	90.8872	TRUE	-4.01756	5.88048e-05	0.00168174	-2.78437	condition on vs pre
KRT32	KRT32	19.3888	TRUE	-4.01653	5.90625e-05	0.00168708	-3.44192	condition on vs pre
AC090772.1	AC090772.1	76.3061	TRUE	4.01611	5.91661e-05	0.0016889	1.50028	condition on vs pre
AL161636.1	AL161636.1	27.0852	TRUE	-4.01585	5.92321e-05	0.00168965	-4.1063	condition on vs pre
AC009102.2	AC009102.2	36.3915	TRUE	4.01406	5.96824e-05	0.00169927	2.34926	condition on vs pre
EDARADD	EDARADD	1750.26	TRUE	-4.0142	5.96486e-05	0.00169927	-2.00512	condition on vs pre
HOGA1	HOGA1	1541.09	TRUE	4.01403	5.96896e-05	0.00169927	1.98837	condition on vs pre
BCYRN1	BCYRN1	29029	TRUE	-4.01356	5.98102e-05	0.00169958	-2.69045	condition on vs pre
MSMB	MSMB	15.8494	TRUE	-4.0135	5.98252e-05	0.00169958	-3.90938	condition on vs pre
SYPL2	SYPL2	239.993	TRUE	4.01336	5.98611e-05	0.00169958	2.76501	condition on vs pre
TSHZ1	TSHZ1	1459.36	TRUE	4.01343	5.98419e-05	0.00169958	1.27933	condition on vs pre
PODXL2	PODXL2	834.168	TRUE	-4.01247	6.00866e-05	0.00170484	-1.30627	condition on vs pre
INSR	INSR	11569.4	TRUE	4.01195	6.02194e-05	0.00170632	1.38682	condition on vs pre
P4HB	P4HB	31175.6	TRUE	4.01208	6.01854e-05	0.00170632	1.22233	condition on vs pre
RN7SL130P	RN7SL130P	35.9019	TRUE	4.01124	6.04005e-05	0.00171031	1.82449	condition on vs pre
CNNM2	CNNM2	1579.91	TRUE	4.0101	6.06926e-05	0.00171629	0.90379	condition on vs pre
IHH	IHH	71.0764	TRUE	4.01022	6.06633e-05	0.00171629	3.38181	condition on vs pre
ITGA5	ITGA5	2918.87	TRUE	4.00939	6.08748e-05	0.00172029	1.14321	condition on vs pre
KYNU	KYNU	8107.79	TRUE	4.00918	6.09287e-05	0.00172067	1.73073	condition on vs pre
ZNF695	ZNF695	189.776	TRUE	-4.00833	6.11489e-05	0.00172573	-2.45903	condition on vs pre
MTCYBP21	MTCYBP21	57.2838	TRUE	4.00733	6.14099e-05	0.00173195	2.44433	condition on vs pre
AC010997.6	AC010997.6	348.252	TRUE	4.00653	6.16164e-05	0.00173661	1.79846	condition on vs pre
AMMECR1LP1	AMMECR1LP1	29.3611	TRUE	-4.00636	6.16628e-05	0.00173672	-2.51303	condition on vs pre
UBE2S	UBE2S	821.309	TRUE	-4.00621	6.17021e-05	0.00173672	-1.89028	condition on vs pre
PNCK	PNCK	236.57	TRUE	-4.00598	6.17611e-05	0.00173722	-2.70052	condition on vs pre
RHPN1-AS1	RHPN1-AS1	119.218	TRUE	-4.00377	6.23405e-05	0.00175236	-1.36952	condition on vs pre
CLVS1	CLVS1	138.708	TRUE	-4.00328	6.2469e-05	0.00175481	-1.77702	condition on vs pre
AC133539.1	AC133539.1	26.7469	TRUE	4.00309	6.25197e-05	0.00175507	4.00216	condition on vs pre
RCL1	RCL1	1991.19	TRUE	4.00281	6.25949e-05	0.00175602	1.66878	condition on vs pre
LINC02037	LINC02037	100.646	TRUE	4.00179	6.28644e-05	0.00176241	2.54139	condition on vs pre
MTHFD1	MTHFD1	9964.9	TRUE	4.00162	6.29115e-05	0.00176256	1.63633	condition on vs pre
C15orf65	C15orf65	49.099	TRUE	-4.00132	6.2991e-05	0.00176334	-1.45335	condition on vs pre
NECAB2	NECAB2	123.016	TRUE	4.00104	6.3064e-05	0.00176334	2.63389	condition on vs pre
SLC6A3	SLC6A3	34.61	TRUE	-4.0011	6.30486e-05	0.00176334	-3.56231	condition on vs pre
CNGA3	CNGA3	63.3144	TRUE	-4.00031	6.32589e-05	0.00176658	-3.47684	condition on vs pre
KIAA1210	KIAA1210	138.458	TRUE	-4.00014	6.33049e-05	0.00176658	-2.08124	condition on vs pre
SLC30A1	SLC30A1	5773.07	TRUE	4.00021	6.3286e-05	0.00176658	1.33737	condition on vs pre
AC009974.1	AC009974.1	56.0581	TRUE	3.99997	6.33499e-05	0.00176667	2.48375	condition on vs pre
MAPK6P1	MAPK6P1	29.4838	TRUE	-3.99963	6.34408e-05	0.00176804	-3.08396	condition on vs pre
AC009086.2	AC009086.2	569.442	TRUE	3.99721	6.40937e-05	0.00178465	3.06743	condition on vs pre
PGRMC1	PGRMC1	9261.49	TRUE	3.99711	6.41211e-05	0.00178465	1.56969	condition on vs pre
REXO1L6P	REXO1L6P	373.247	TRUE	-3.99645	6.42997e-05	0.00178844	-2.89393	condition on vs pre
AOX1	AOX1	32110.7	TRUE	3.99518	6.46453e-05	0.00179688	3.49779	condition on vs pre
FDX1	FDX1	1184.15	TRUE	3.99484	6.47371e-05	0.00179825	1.77869	condition on vs pre
AC103591.1	AC103591.1	31.0966	TRUE	3.99448	6.48368e-05	0.00179946	3.39397	condition on vs pre
RAB9B	RAB9B	58.4367	TRUE	-3.99437	6.48657e-05	0.00179946	-1.56366	condition on vs pre
AP006216.3	AP006216.3	10.4335	TRUE	3.99355	6.50919e-05	0.00180455	4.57922	condition on vs pre
LPA	LPA	13170.7	TRUE	3.99302	6.52382e-05	0.00180743	5.16395	condition on vs pre
AP001025.1	AP001025.1	16.1136	TRUE	-3.99271	6.53216e-05	0.00180855	-2.96839	condition on vs pre
NFE2L1	NFE2L1	9661.35	TRUE	3.99211	6.54883e-05	0.00181199	1.31892	condition on vs pre
RIN3	RIN3	1288.29	TRUE	3.9919	6.5547e-05	0.00181242	1.43706	condition on vs pre
LINC02548	LINC02548	14.5325	TRUE	-3.99161	6.56252e-05	0.0018134	-4.4934	condition on vs pre
FMO4	FMO4	736.613	TRUE	3.98975	6.6144e-05	0.00182655	1.77929	condition on vs pre
MMP15	MMP15	1914.1	TRUE	3.98957	6.61924e-05	0.00182669	1.43603	condition on vs pre
AC009102.3	AC009102.3	55.5569	TRUE	3.98866	6.64473e-05	0.00182699	2.72323	condition on vs pre
ADAMTS7P1	ADAMTS7P1	31.7115	TRUE	-3.9889	6.63798e-05	0.00182699	-3.19836	condition on vs pre
LINC00460	LINC00460	39.0058	TRUE	-3.98861	6.64619e-05	0.00182699	-3.23023	condition on vs pre
SEC14L4	SEC14L4	1200.57	TRUE	3.98895	6.63659e-05	0.00182699	1.84915	condition on vs pre
SEPSECS	SEPSECS	1755.5	TRUE	3.98931	6.62646e-05	0.00182699	1.55939	condition on vs pre
UBA52P8	UBA52P8	86.6282	TRUE	3.98891	6.63781e-05	0.00182699	1.69102	condition on vs pre
HECTD1	HECTD1	13268.9	TRUE	3.98843	6.6513e-05	0.00182721	1.12482	condition on vs pre
PDXP	PDXP	788.552	TRUE	3.98806	6.66159e-05	0.00182885	1.8969	condition on vs pre
AC009119.3	AC009119.3	19.4786	TRUE	3.98789	6.66626e-05	0.00182895	2.11826	condition on vs pre
AL078459.1	AL078459.1	140.978	TRUE	3.98655	6.70401e-05	0.00183811	1.26971	condition on vs pre
LINC00511	LINC00511	426.053	TRUE	-3.98636	6.70938e-05	0.0018384	-1.5725	condition on vs pre
HS6ST3	HS6ST3	447.597	TRUE	-3.98545	6.73515e-05	0.00184426	-2.69348	condition on vs pre
TOP2A	TOP2A	4624.72	TRUE	-3.98512	6.74446e-05	0.00184562	-2.66226	condition on vs pre
STMN2	STMN2	185.409	TRUE	-3.9847	6.75664e-05	0.00184776	-2.45235	condition on vs pre
ITPRID2	ITPRID2	7001.97	TRUE	3.98445	6.76367e-05	0.00184849	1.15716	condition on vs pre
GRHPR	GRHPR	11127.9	TRUE	3.9833	6.79654e-05	0.00185628	2.24829	condition on vs pre
GJA5	GJA5	161.754	TRUE	-3.98301	6.80486e-05	0.00185735	-1.64123	condition on vs pre
LINC01780	LINC01780	30.4567	TRUE	3.98273	6.81281e-05	0.00185832	3.42719	condition on vs pre
GGT3P	GGT3P	31.4589	TRUE	-3.982	6.83365e-05	0.00186281	-2.29995	condition on vs pre
TEDC2	TEDC2	310.868	TRUE	-3.97993	6.89366e-05	0.00187796	-1.72177	condition on vs pre
MLF1	MLF1	425.977	TRUE	-3.97932	6.91134e-05	0.00188156	-1.78591	condition on vs pre
LYPD1	LYPD1	83.3709	TRUE	-3.97916	6.91586e-05	0.00188158	-1.90385	condition on vs pre
NPM1P24	NPM1P24	43.1929	TRUE	3.9769	6.98203e-05	0.00189837	1.89321	condition on vs pre
PLAC1	PLAC1	34.1707	TRUE	-3.97642	6.99593e-05	0.00190093	-2.59894	condition on vs pre
AC009119.2	AC009119.2	163.532	TRUE	3.97608	7.00603e-05	0.00190171	1.75825	condition on vs pre
KIF18A	KIF18A	289.02	TRUE	-3.97602	7.00777e-05	0.00190171	-2.04311	condition on vs pre
TUBB8	TUBB8	104.281	TRUE	-3.97536	7.02743e-05	0.00190582	-2.02963	condition on vs pre
PICART1	PICART1	33.1454	TRUE	-3.97474	7.04577e-05	0.00190957	-2.57452	condition on vs pre
KRT74	KRT74	23.8557	TRUE	-3.97436	7.05689e-05	0.00191136	-4.38994	condition on vs pre
NKILA	NKILA	131.404	TRUE	-3.97415	7.06324e-05	0.00191186	-1.55808	condition on vs pre
MTIF2P1	MTIF2P1	76.8752	TRUE	3.97359	7.07984e-05	0.00191513	3.04288	condition on vs pre
RAD51AP1	RAD51AP1	255.773	TRUE	-3.97257	7.11006e-05	0.00192208	-1.30731	condition on vs pre
PCSK1N	PCSK1N	53.0697	TRUE	-3.97218	7.12189e-05	0.00192405	-2.88904	condition on vs pre
APOC2	APOC2	22441.3	TRUE	3.9719	7.1302e-05	0.00192506	3.66344	condition on vs pre
MFAP3L	MFAP3L	2103.01	TRUE	3.97076	7.16448e-05	0.00193309	2.50608	condition on vs pre
ABHD17AP3	ABHD17AP3	23.427	TRUE	-3.97028	7.1787e-05	0.00193569	-2.64606	condition on vs pre
RPRM	RPRM	20.5625	TRUE	-3.96971	7.19597e-05	0.00193911	-3.43906	condition on vs pre
SPINK8	SPINK8	98.9382	TRUE	-3.96836	7.23681e-05	0.00194888	-3.01801	condition on vs pre
AC010280.2	AC010280.2	34.9424	TRUE	3.96779	7.25431e-05	0.00195235	4.05851	condition on vs pre
LINC01666	LINC01666	116.049	TRUE	-3.96747	7.26408e-05	0.00195374	-3.48544	condition on vs pre
AL391427.1	AL391427.1	84.5889	TRUE	3.96722	7.27165e-05	0.00195453	2.30299	condition on vs pre
DDN	DDN	56.3247	TRUE	-3.96682	7.28388e-05	0.00195658	-2.45668	condition on vs pre
BPHL	BPHL	2944.76	TRUE	3.9663	7.29979e-05	0.00195961	1.68874	condition on vs pre
LINC02027	LINC02027	109.235	TRUE	3.96587	7.31285e-05	0.00196187	4.16918	condition on vs pre
LRRC2	LRRC2	512.254	TRUE	3.96549	7.32441e-05	0.00196373	2.01965	condition on vs pre
AL360181.1	AL360181.1	14.1392	TRUE	3.96525	7.33193e-05	0.0019645	3.3825	condition on vs pre
IL11RA	IL11RA	618.276	TRUE	3.96496	7.34081e-05	0.00196564	1.54843	condition on vs pre
ECHS1	ECHS1	12699.6	TRUE	3.96447	7.35606e-05	0.00196795	2.32643	condition on vs pre
ZCCHC24	ZCCHC24	2194.93	TRUE	3.96438	7.35874e-05	0.00196795	1.6683	condition on vs pre
ELFN1	ELFN1	758.097	TRUE	3.96156	7.4462e-05	0.00199009	2.77227	condition on vs pre
URAHP	URAHP	252.709	TRUE	3.96116	7.45862e-05	0.00199215	1.57731	condition on vs pre
FLYWCH2	FLYWCH2	905.233	TRUE	-3.96083	7.46896e-05	0.00199365	-1.37768	condition on vs pre
BECN2	BECN2	25.5695	TRUE	-3.95999	7.49516e-05	0.00199939	-2.82502	condition on vs pre
CDC20B	CDC20B	181.05	TRUE	-3.95916	7.52153e-05	0.00200516	-2.71998	condition on vs pre
AL138878.2	AL138878.2	30.3853	TRUE	-3.95834	7.54712e-05	0.00201071	-2.80847	condition on vs pre
KRT6B	KRT6B	24.8216	TRUE	-3.95699	7.59011e-05	0.0020209	-4.41217	condition on vs pre
AC097059.1	AC097059.1	31.9161	TRUE	-3.95581	7.62762e-05	0.00202706	-2.68975	condition on vs pre
AC112721.1	AC112721.1	20.1517	TRUE	-3.95599	7.62181e-05	0.00202706	-3.61223	condition on vs pre
ZBTB48	ZBTB48	1190.57	TRUE	3.95588	7.62527e-05	0.00202706	1.37897	condition on vs pre
RGPD2	RGPD2	1978.9	TRUE	3.95493	7.65558e-05	0.00203322	1.69024	condition on vs pre
CIB3	CIB3	16.5317	TRUE	-3.95412	7.68154e-05	0.00203883	-3.41361	condition on vs pre
GOT2	GOT2	6138.16	TRUE	3.95332	7.70729e-05	0.00204439	1.59441	condition on vs pre
LHX1	LHX1	62.0351	TRUE	-3.9528	7.72406e-05	0.0020474	-4.00878	condition on vs pre
LINC02076	LINC02076	102.094	TRUE	-3.95267	7.7283e-05	0.0020474	-1.90888	condition on vs pre
ABCD4	ABCD4	1731.01	TRUE	3.95215	7.74522e-05	0.0020506	1.16434	condition on vs pre
MYOM1	MYOM1	2348.61	TRUE	3.95178	7.75731e-05	0.00205251	2.8231	condition on vs pre
ACRV1	ACRV1	24.338	TRUE	-3.95115	7.77763e-05	0.0020566	-2.61849	condition on vs pre
DUX4L33	DUX4L33	41.9627	TRUE	-3.95098	7.78304e-05	0.00205675	-3.8971	condition on vs pre
AADAC	AADAC	3797.52	TRUE	3.95081	7.78863e-05	0.00205695	3.91415	condition on vs pre
DPCD	DPCD	566.144	TRUE	-3.95029	7.80568e-05	0.00206016	-1.49498	condition on vs pre
AC104394.1	AC104394.1	88.1917	TRUE	3.9501	7.81173e-05	0.00206048	4.20788	condition on vs pre
HIST2H3D	HIST2H3D	2229.36	TRUE	-3.94954	7.8302e-05	0.00206397	-2.67172	condition on vs pre
HP	HP	441234	TRUE	3.9494	7.83473e-05	0.00206397	4.95006	condition on vs pre
ZC3H13	ZC3H13	4274.68	TRUE	3.94901	7.84766e-05	0.00206609	1.27986	condition on vs pre
OR7E11P	OR7E11P	72.1565	TRUE	-3.94757	7.8949e-05	0.00207724	-1.71807	condition on vs pre
INSRR	INSRR	45.2973	TRUE	-3.94612	7.94272e-05	0.00208853	-2.8346	condition on vs pre
MIR194-2HG	MIR194-2HG	759.322	TRUE	3.94572	7.9561e-05	0.00209068	1.67279	condition on vs pre
NME5	NME5	102.912	TRUE	-3.94558	7.9608e-05	0.00209068	-1.45365	condition on vs pre
AP000919.1	AP000919.1	157.321	TRUE	3.9451	7.97657e-05	0.00209353	1.71301	condition on vs pre
PRSS30P	PRSS30P	175.344	TRUE	-3.94494	7.98186e-05	0.00209362	-1.5135	condition on vs pre
LINC02153	LINC02153	66.7916	TRUE	3.94417	8.00782e-05	0.00209911	3.46229	condition on vs pre
SERPINB5	SERPINB5	70.6931	TRUE	-3.94402	8.0127e-05	0.00209911	-3.88326	condition on vs pre
MYO18A	MYO18A	7452.88	TRUE	3.943	8.04689e-05	0.00210546	1.61167	condition on vs pre
OR51E1	OR51E1	34.7499	TRUE	-3.9431	8.04351e-05	0.00210546	-2.68401	condition on vs pre
GATA4	GATA4	721.064	TRUE	3.94218	8.07445e-05	0.00210876	2.82677	condition on vs pre
GNAT1	GNAT1	86.8071	TRUE	3.94228	8.07106e-05	0.00210876	3.37978	condition on vs pre
MND1	MND1	64.6873	TRUE	-3.94229	8.07063e-05	0.00210876	-1.91719	condition on vs pre
SRRM1P3	SRRM1P3	100.508	TRUE	-3.94195	8.0823e-05	0.00210951	-1.53998	condition on vs pre
GNAO1	GNAO1	2049.69	TRUE	3.94068	8.12495e-05	0.00211934	3.17648	condition on vs pre
NR5A2	NR5A2	1570.09	TRUE	3.94049	8.13146e-05	0.00211973	2.42888	condition on vs pre
TENT4B	TENT4B	978.026	TRUE	3.9403	8.13808e-05	0.00212016	1.17825	condition on vs pre
AC002407.1	AC002407.1	67.5077	TRUE	-3.93987	8.15252e-05	0.00212261	-2.73694	condition on vs pre
TMEM106C	TMEM106C	2661.28	TRUE	-3.93809	8.21315e-05	0.00213708	-1.48168	condition on vs pre
AKR1D1	AKR1D1	4361.41	TRUE	3.93736	8.23815e-05	0.00214227	3.48188	condition on vs pre
DHTKD1	DHTKD1	8484.3	TRUE	3.93704	8.24945e-05	0.00214389	1.8064	condition on vs pre
IDH1	IDH1	9656.98	TRUE	3.93673	8.25999e-05	0.00214532	1.43111	condition on vs pre
HOXD8	HOXD8	179.842	TRUE	-3.93645	8.2697e-05	0.00214652	-2.40306	condition on vs pre
LINC01817	LINC01817	21.3857	TRUE	3.93607	8.2827e-05	0.00214727	3.9865	condition on vs pre
TUBB8P7	TUBB8P7	38.7308	TRUE	-3.93609	8.28202e-05	0.00214727	-2.27385	condition on vs pre
EIF4EBP2	EIF4EBP2	9167.25	TRUE	3.93494	8.32171e-05	0.00215606	1.00459	condition on vs pre
AC004593.1	AC004593.1	83.2144	TRUE	3.93277	8.39713e-05	0.00217162	2.38793	condition on vs pre
C1QL4	C1QL4	18.8763	TRUE	-3.93284	8.3948e-05	0.00217162	-3.03426	condition on vs pre
ZIK1	ZIK1	193.602	TRUE	-3.93306	8.38717e-05	0.00217162	-1.49579	condition on vs pre
OR2T5	OR2T5	14.9971	TRUE	-3.93152	8.44104e-05	0.00218164	-3.97177	condition on vs pre
ITGA1	ITGA1	8429.16	TRUE	3.93046	8.4784e-05	0.00218996	1.48777	condition on vs pre
AC012613.2	AC012613.2	526.995	TRUE	3.92954	8.51088e-05	0.00219701	1.48489	condition on vs pre
HOXA13	HOXA13	106.233	TRUE	-3.92725	8.59212e-05	0.00221663	-2.74471	condition on vs pre
U91319.1	U91319.1	72.8152	TRUE	3.92677	8.60937e-05	0.00221973	2.55438	condition on vs pre
AL807752.3	AL807752.3	19.5874	TRUE	-3.92587	8.64169e-05	0.00222671	-5.59145	condition on vs pre
ART4	ART4	1766.22	TRUE	3.92542	8.65779e-05	0.0022295	2.32082	condition on vs pre
SLC6A17	SLC6A17	72.2552	TRUE	-3.92489	8.6771e-05	0.00223312	-2.28968	condition on vs pre
AGFG2	AGFG2	2164.33	TRUE	3.92412	8.70457e-05	0.00223611	2.03741	condition on vs pre
NLRP3P1	NLRP3P1	38.4028	TRUE	-3.92422	8.70122e-05	0.00223611	-2.65419	condition on vs pre
PTHLH	PTHLH	64.186	TRUE	-3.92431	8.69777e-05	0.00223611	-2.34527	condition on vs pre
POFUT1	POFUT1	4604.3	TRUE	3.9228	8.75266e-05	0.00224574	0.992087	condition on vs pre
TMSB15A	TMSB15A	30.4743	TRUE	-3.92289	8.74941e-05	0.00224574	-3.58813	condition on vs pre
ACOT13	ACOT13	2481.06	TRUE	3.92228	8.77134e-05	0.00224917	1.61957	condition on vs pre
PTPN3	PTPN3	3475.39	TRUE	3.9214	8.80356e-05	0.00225607	1.2668	condition on vs pre
AL080317.2	AL080317.2	128.467	TRUE	3.91962	8.86886e-05	0.00227143	1.41891	condition on vs pre
AC006160.1	AC006160.1	258.226	TRUE	3.91862	8.9058e-05	0.00227951	1.10638	condition on vs pre
PDE11A	PDE11A	1134.78	TRUE	3.91809	8.92538e-05	0.00228314	2.24101	condition on vs pre
CAMKV	CAMKV	59.0868	TRUE	-3.91773	8.93886e-05	0.00228383	-3.36271	condition on vs pre
SLC7A9	SLC7A9	319.933	TRUE	3.91775	8.93802e-05	0.00228383	2.00332	condition on vs pre
ANK1	ANK1	186.332	TRUE	-3.91751	8.9469e-05	0.00228451	-2.11005	condition on vs pre
SLC35B4	SLC35B4	1278.22	TRUE	3.91704	8.96424e-05	0.00228756	1.16046	condition on vs pre
CNR1	CNR1	131.237	TRUE	-3.91658	8.9813e-05	0.00229053	-2.70121	condition on vs pre
RPS2P36	RPS2P36	71.6521	TRUE	3.9164	8.98824e-05	0.00229092	2.3403	condition on vs pre
PRAP1	PRAP1	4037.73	TRUE	3.91617	8.99662e-05	0.00229168	3.98834	condition on vs pre
CTNNA3	CTNNA3	539.037	TRUE	3.91533	9.02822e-05	0.00229696	2.86491	condition on vs pre
IGFL2	IGFL2	45.911	TRUE	-3.91537	9.02649e-05	0.00229696	-2.93039	condition on vs pre
ANKRD62P1	ANKRD62P1	172.843	TRUE	-3.91481	9.04741e-05	0.00229972	-3.58657	condition on vs pre
DCAF11	DCAF11	7551.22	TRUE	3.91475	9.04991e-05	0.00229972	1.73912	condition on vs pre
CGN	CGN	3958.91	TRUE	3.91362	9.09211e-05	0.00230906	1.63071	condition on vs pre
SLC23A2	SLC23A2	6200.19	TRUE	3.91304	9.11424e-05	0.00231329	1.80528	condition on vs pre
TMEM140	TMEM140	1643.98	TRUE	3.91278	9.1239e-05	0.00231436	1.546	condition on vs pre
RPL7AP11	RPL7AP11	21.3735	TRUE	-3.91179	9.16161e-05	0.00232253	-2.41355	condition on vs pre
NOS2P1	NOS2P1	69.6709	TRUE	-3.9112	9.18387e-05	0.00232678	-1.95028	condition on vs pre
SPP2	SPP2	2035.27	TRUE	3.90945	9.25051e-05	0.00234226	1.97399	condition on vs pre
AC005549.1	AC005549.1	19.3916	TRUE	-3.90908	9.26496e-05	0.00234452	-3.81747	condition on vs pre
C6orf99	C6orf99	77.1367	TRUE	-3.90785	9.31199e-05	0.00235502	-1.92444	condition on vs pre
ANO1	ANO1	5107.43	TRUE	3.90578	9.39223e-05	0.00237389	1.34392	condition on vs pre
BBOX1	BBOX1	738.574	TRUE	3.90545	9.40506e-05	0.00237572	3.69384	condition on vs pre
AC092809.4	AC092809.4	69.7399	TRUE	-3.90528	9.41167e-05	0.00237597	-1.71702	condition on vs pre
CACNG3	CACNG3	47.3182	TRUE	-3.90509	9.41918e-05	0.00237645	-3.78524	condition on vs pre
DDC	DDC	644.127	TRUE	3.90479	9.43072e-05	0.00237795	3.64254	condition on vs pre
GLYATL1	GLYATL1	5137.91	TRUE	3.90371	9.47311e-05	0.00238721	2.73712	condition on vs pre
AP1M1	AP1M1	3933.71	TRUE	3.90271	9.5123e-05	0.00239566	1.1396	condition on vs pre
MTMR4	MTMR4	4529.01	TRUE	3.89984	9.62571e-05	0.00242278	1.51821	condition on vs pre
SLC25A13	SLC25A13	3147.19	TRUE	3.89948	9.63982e-05	0.00242489	1.97584	condition on vs pre
ANKS4B	ANKS4B	1227.61	TRUE	3.89776	9.70847e-05	0.00243927	1.87361	condition on vs pre
MTND5P19	MTND5P19	78.6069	TRUE	-3.89788	9.7038e-05	0.00243927	-1.76339	condition on vs pre
ALDH1A2	ALDH1A2	425.237	TRUE	3.89735	9.72503e-05	0.00244198	2.80584	condition on vs pre
AC008549.2	AC008549.2	65.6323	TRUE	3.89677	9.74833e-05	0.00244616	1.70143	condition on vs pre
FA2H	FA2H	68.6572	TRUE	-3.89651	9.75902e-05	0.00244616	-2.08427	condition on vs pre
SIGMAR1	SIGMAR1	2117.69	TRUE	3.89659	9.75572e-05	0.00244616	1.70794	condition on vs pre
TH	TH	110.636	TRUE	3.8961	9.77552e-05	0.00244885	2.69144	condition on vs pre
AC079210.1	AC079210.1	12.9345	TRUE	3.89498	9.82073e-05	0.00245872	2.76643	condition on vs pre
DIPK1A	DIPK1A	500.926	TRUE	3.89456	9.83752e-05	0.00246147	1.48335	condition on vs pre
GABRA3	GABRA3	78.3136	TRUE	-3.89386	9.86627e-05	0.0024643	-3.33611	condition on vs pre
SMPDL3A	SMPDL3A	962.599	TRUE	3.89396	9.86203e-05	0.0024643	1.79632	condition on vs pre
STAB1	STAB1	8327.93	TRUE	3.89397	9.86149e-05	0.0024643	1.89472	condition on vs pre
APOA2	APOA2	59925.4	TRUE	3.89269	9.914e-05	0.00247378	4.28856	condition on vs pre
TCTEX1D2	TCTEX1D2	279.493	TRUE	-3.89264	9.9159e-05	0.00247378	-1.42404	condition on vs pre
UHRF1	UHRF1	1197.38	TRUE	-3.89214	9.93654e-05	0.00247747	-1.76334	condition on vs pre
IFT22	IFT22	1466.7	TRUE	-3.89181	9.94988e-05	0.00247933	-1.09115	condition on vs pre
PARP4	PARP4	3869.8	TRUE	3.89147	9.96389e-05	0.00248136	1.43959	condition on vs pre
ONECUT1	ONECUT1	1570.47	TRUE	3.89132	9.97003e-05	0.00248144	3.23688	condition on vs pre
CRIP2	CRIP2	3519.57	TRUE	-3.89082	9.9907e-05	0.00248512	-1.46248	condition on vs pre
PCCA	PCCA	4025.1	TRUE	3.89062	9.99879e-05	0.00248567	1.07927	condition on vs pre
ACKR4	ACKR4	206.555	TRUE	3.88914	0.000100601	0.00249944	1.2593	condition on vs pre
CHRNB3	CHRNB3	27.4893	TRUE	-3.88848	0.000100875	0.0025048	-4.01564	condition on vs pre
EIF4BP3	EIF4BP3	20.9448	TRUE	-3.88637	0.000101753	0.00252512	-3.12468	condition on vs pre
ORM2	ORM2	18634	TRUE	3.88572	0.000102025	0.00253038	4.11426	condition on vs pre
AC023024.2	AC023024.2	162.032	TRUE	3.88545	0.000102142	0.00253179	2.20973	condition on vs pre
ZP1	ZP1	25.1341	TRUE	-3.88498	0.000102337	0.00253515	-2.4174	condition on vs pre
SPATA17	SPATA17	291.913	TRUE	-3.88426	0.000102642	0.0025412	-1.83781	condition on vs pre
NARSP2	NARSP2	8.43489	TRUE	-3.88189	0.000103648	0.00256463	-4.13612	condition on vs pre
DLC1	DLC1	2513.19	TRUE	3.88086	0.000104086	0.00257395	1.66642	condition on vs pre
C8A	C8A	12492.8	TRUE	3.88069	0.000104162	0.00257433	4.99095	condition on vs pre
AL359893.1	AL359893.1	101.677	TRUE	3.88005	0.000104435	0.00257856	3.69641	condition on vs pre
LINC01471	LINC01471	27.7577	TRUE	-3.87987	0.000104513	0.00257856	-4.62119	condition on vs pre
RASGRF1	RASGRF1	262.034	TRUE	-3.87986	0.000104516	0.00257856	-2.92936	condition on vs pre
AC011352.3	AC011352.3	13.6116	TRUE	-3.87797	0.000105334	0.00259572	-4.10563	condition on vs pre
ACAT1	ACAT1	8401.75	TRUE	3.87801	0.000105315	0.00259572	2.44674	condition on vs pre
Z93929.2	Z93929.2	36.7206	TRUE	-3.8776	0.000105493	0.00259813	-3.63791	condition on vs pre
AC254562.1	AC254562.1	104.344	TRUE	3.87506	0.0001066	0.00262387	2.28644	condition on vs pre
ABHD18	ABHD18	1559.49	TRUE	3.87376	0.000107168	0.00263631	1.07429	condition on vs pre
AC068228.1	AC068228.1	9.80596	TRUE	-3.87361	0.000107234	0.00263642	-4.43083	condition on vs pre
LSR	LSR	4280.49	TRUE	3.87335	0.000107348	0.00263768	1.05847	condition on vs pre
AC091812.3	AC091812.3	185.366	TRUE	-3.87193	0.000107975	0.00264623	-2.80037	condition on vs pre
AC117453.1	AC117453.1	21.8678	TRUE	-3.87232	0.000107804	0.00264623	-2.88042	condition on vs pre
HNF4G	HNF4G	411.105	TRUE	3.87205	0.000107924	0.00264623	2.80076	condition on vs pre
SHH	SHH	594.7	TRUE	3.8721	0.000107904	0.00264623	3.0148	condition on vs pre
STXBP5L	STXBP5L	102.218	TRUE	-3.87186	0.000108008	0.00264623	-2.08411	condition on vs pre
EGLN3P1	EGLN3P1	63.6763	TRUE	3.87135	0.000108233	0.00265022	1.47427	condition on vs pre
FLVCR2	FLVCR2	612.993	TRUE	3.86897	0.000109296	0.00267344	1.53085	condition on vs pre
LCN12	LCN12	229.893	TRUE	3.86894	0.000109308	0.00267344	1.55746	condition on vs pre
LINC01743	LINC01743	12.2153	TRUE	-3.86739	0.000110005	0.00268894	-4.19748	condition on vs pre
CCL23	CCL23	46.6354	TRUE	3.86625	0.000110521	0.00269844	3.02334	condition on vs pre
CPT1A	CPT1A	10438.3	TRUE	3.86632	0.000110489	0.00269844	1.35029	condition on vs pre
LINC02112	LINC02112	22.9705	TRUE	-3.8655	0.000110862	0.00270519	-3.13341	condition on vs pre
SEC14L3	SEC14L3	77.9647	TRUE	3.86511	0.000111038	0.00270793	3.10959	condition on vs pre
LINC01687	LINC01687	237.169	TRUE	3.86483	0.000111165	0.00270946	1.91758	condition on vs pre
CBX2	CBX2	827.068	TRUE	-3.86396	0.000111562	0.00271758	-2.43049	condition on vs pre
FETUB	FETUB	1384.94	TRUE	3.86374	0.000111662	0.00271846	3.914	condition on vs pre
AC004160.1	AC004160.1	347.121	TRUE	3.86197	0.000112478	0.00273423	2.89586	condition on vs pre
ARHGAP42	ARHGAP42	1457.91	TRUE	3.86191	0.000112504	0.00273423	1.76554	condition on vs pre
HIST2H2BF	HIST2H2BF	6247.6	TRUE	-3.86214	0.000112399	0.00273423	-1.83809	condition on vs pre
DENND5B	DENND5B	1747.15	TRUE	3.86141	0.000112732	0.00273822	1.84338	condition on vs pre
AC091182.1	AC091182.1	187.026	TRUE	-3.86089	0.000112973	0.0027425	-2.80433	condition on vs pre
AC118758.3	AC118758.3	2564.06	TRUE	-3.86	0.000113388	0.00274338	-2.75782	condition on vs pre
APOA1-AS	APOA1-AS	52.6974	TRUE	3.86032	0.000113237	0.00274338	2.06634	condition on vs pre
ASPM	ASPM	1701.84	TRUE	-3.86033	0.000113236	0.00274338	-1.74925	condition on vs pre
DLX4	DLX4	55.9793	TRUE	-3.86025	0.000113273	0.00274338	-2.31337	condition on vs pre
GBE1	GBE1	1963.89	TRUE	3.85998	0.000113398	0.00274338	1.75797	condition on vs pre
NFATC3	NFATC3	2537.05	TRUE	3.8601	0.00011334	0.00274338	1.17622	condition on vs pre
LRRC8A	LRRC8A	2870.37	TRUE	3.85979	0.000113483	0.00274387	1.10973	condition on vs pre
AL117351.1	AL117351.1	11.9813	TRUE	3.85879	0.00011395	0.00275358	3.91112	condition on vs pre
HOXA11-AS	HOXA11-AS	33.3261	TRUE	-3.85864	0.000114019	0.00275369	-3.55175	condition on vs pre
MT2A	MT2A	14955.2	TRUE	3.85836	0.000114153	0.00275534	3.00204	condition on vs pre
AC022509.3	AC022509.3	23.0065	TRUE	-3.85735	0.000114623	0.00276043	-2.71822	condition on vs pre
PPP2R2C	PPP2R2C	1020.27	TRUE	-3.85773	0.000114445	0.00276043	-3.38668	condition on vs pre
TRAM2	TRAM2	2518.36	TRUE	3.85744	0.000114581	0.00276043	1.00499	condition on vs pre
ZMYND10	ZMYND10	263.953	TRUE	-3.85735	0.000114624	0.00276043	-1.56269	condition on vs pre
AC003973.2	AC003973.2	93.7374	TRUE	-3.85701	0.000114783	0.00276118	-2.33619	condition on vs pre
SH3PXD2A	SH3PXD2A	5262.66	TRUE	3.857	0.000114786	0.00276118	1.57207	condition on vs pre
CADM1	CADM1	2053.39	TRUE	3.85517	0.00011565	0.00277724	1.49338	condition on vs pre
ETNPPL	ETNPPL	771.239	TRUE	3.85524	0.000115616	0.00277724	3.24191	condition on vs pre
NAPEPLD	NAPEPLD	1321.54	TRUE	3.85517	0.000115649	0.00277724	1.12038	condition on vs pre
ELOA	ELOA	2554.39	TRUE	3.85421	0.000116103	0.00278653	1.05586	condition on vs pre
DIAPH1	DIAPH1	6087.6	TRUE	3.85318	0.000116594	0.00279673	1.19624	condition on vs pre
LINC01018	LINC01018	2225.65	TRUE	3.85197	0.000117169	0.00280894	3.77858	condition on vs pre
AC025263.3	AC025263.3	13.7377	TRUE	-3.85167	0.000117317	0.0028109	-3.60498	condition on vs pre
ZDHHC14	ZDHHC14	1018.59	TRUE	3.84993	0.000118149	0.00282924	1.33478	condition on vs pre
ETFB	ETFB	7359.37	TRUE	3.84938	0.000118419	0.00283249	2.17058	condition on vs pre
LINC01612	LINC01612	13.6547	TRUE	3.84951	0.000118353	0.00283249	3.94082	condition on vs pre
TACR2	TACR2	86.9312	TRUE	-3.84915	0.000118529	0.00283353	-1.28075	condition on vs pre
DBET	DBET	1518.7	TRUE	-3.8484	0.000118891	0.0028394	-2.75838	condition on vs pre
SLC25A10	SLC25A10	2272.96	TRUE	3.84837	0.000118909	0.0028394	1.35726	condition on vs pre
FOXF2	FOXF2	53.9247	TRUE	-3.84669	0.000119723	0.00285723	-2.70107	condition on vs pre
VNN3	VNN3	393.275	TRUE	3.8435	0.000121293	0.00289308	2.0842	condition on vs pre
CFHR5	CFHR5	1974.15	TRUE	3.84319	0.000121446	0.00289347	3.77284	condition on vs pre
DHRS1	DHRS1	2061.14	TRUE	3.84327	0.000121404	0.00289347	1.65195	condition on vs pre
SPX	SPX	176.928	TRUE	3.84278	0.000121646	0.0028966	2.84327	condition on vs pre
CPS1-IT1	CPS1-IT1	608.416	TRUE	3.84219	0.000121943	0.00290172	3.5085	condition on vs pre
HSPE1P19	HSPE1P19	29.2235	TRUE	3.84208	0.000121998	0.00290172	3.28511	condition on vs pre
CICP11	CICP11	33.9768	TRUE	-3.84187	0.000122101	0.00290253	-3.15618	condition on vs pre
ABCA9	ABCA9	2072.97	TRUE	3.84117	0.000122447	0.00290913	1.82434	condition on vs pre
AC027237.1	AC027237.1	17.4599	TRUE	-3.84083	0.000122619	0.00291158	-3.05645	condition on vs pre
CR936218.2	CR936218.2	96.1135	TRUE	3.84024	0.000122915	0.00291698	2.41745	condition on vs pre
DUX4	DUX4	739.935	TRUE	-3.83919	0.00012344	0.0029278	-2.74969	condition on vs pre
RHEBP1	RHEBP1	249.235	TRUE	3.83898	0.000123546	0.00292866	2.57389	condition on vs pre
C1RL-AS1	C1RL-AS1	1154.87	TRUE	3.83741	0.000124338	0.0029458	1.79959	condition on vs pre
AC004066.2	AC004066.2	21.4413	TRUE	-3.83696	0.000124568	0.0029496	-2.09634	condition on vs pre
TUBA3C	TUBA3C	14.4922	TRUE	-3.83681	0.000124643	0.00294972	-4.43522	condition on vs pre
SEPT3	SEPT3	289.648	TRUE	-3.83582	0.000125147	0.00295999	-2.35025	condition on vs pre
OR13G1	OR13G1	110.436	TRUE	-3.83552	0.000125298	0.0029619	-2.54709	condition on vs pre
AC020937.1	AC020937.1	56.7387	TRUE	3.83474	0.000125697	0.00296968	3.41746	condition on vs pre
CCDC144NL-AS1	CCDC144NL-AS1	382.046	TRUE	-3.83378	0.000126191	0.0029797	-1.55409	condition on vs pre
SLC17A1	SLC17A1	324.444	TRUE	3.83346	0.000126353	0.00298185	3.91198	condition on vs pre
BPIFA4P	BPIFA4P	48.726	TRUE	-3.83275	0.000126717	0.00298879	-2.71204	condition on vs pre
HNRNPA3P8	HNRNPA3P8	12.0592	TRUE	-3.83221	0.000126997	0.00299206	-4.04708	condition on vs pre
RPL31P20	RPL31P20	52.8673	TRUE	3.83228	0.000126962	0.00299206	1.45891	condition on vs pre
AC108751.5	AC108751.5	210.649	TRUE	3.83197	0.000127124	0.00299338	3.13351	condition on vs pre
AC005702.3	AC005702.3	8.0006	TRUE	-3.83133	0.000127453	0.00299947	-5.37045	condition on vs pre
GSTO2	GSTO2	964.999	TRUE	-3.83065	0.000127806	0.00300609	-1.08432	condition on vs pre
WDR78	WDR78	461.724	TRUE	-3.83029	0.000127991	0.00300878	-1.26701	condition on vs pre
MIR4697HG	MIR4697HG	195.698	TRUE	-3.83008	0.000128104	0.00300976	-1.95172	condition on vs pre
FUT6	FUT6	634.217	TRUE	3.82944	0.000128436	0.00301588	1.39287	condition on vs pre
BIK	BIK	371.551	TRUE	-3.82914	0.00012859	0.00301785	-1.65983	condition on vs pre
UGT3A1	UGT3A1	1659.83	TRUE	3.82815	0.000129108	0.00302832	3.62418	condition on vs pre
SRSF1P1	SRSF1P1	20.5347	TRUE	-3.82773	0.000129331	0.00303187	-3.47116	condition on vs pre
CCDC136	CCDC136	147.824	TRUE	-3.82707	0.000129679	0.00303836	-1.56678	condition on vs pre
CASC2	CASC2	266.721	TRUE	-3.82652	0.000129967	0.0030434	-1.07295	condition on vs pre
CA8	CA8	712.019	TRUE	-3.8262	0.000130137	0.00304531	-2.19134	condition on vs pre
CTSZ	CTSZ	8003.71	TRUE	3.82596	0.000130264	0.00304531	1.16231	condition on vs pre
TMEM237	TMEM237	791.259	TRUE	-3.826	0.000130241	0.00304531	-1.15938	condition on vs pre
PLSCR4	PLSCR4	1369.01	TRUE	3.82503	0.000130756	0.00305514	1.9426	condition on vs pre
AC099521.1	AC099521.1	14.9821	TRUE	-3.82476	0.000130898	0.0030563	-3.422	condition on vs pre
FAM149A	FAM149A	964.337	TRUE	3.82457	0.000131	0.0030563	2.54508	condition on vs pre
SLC22A7	SLC22A7	8342.7	TRUE	3.82453	0.000131023	0.0030563	4.8538	condition on vs pre
CSAD	CSAD	3151.05	TRUE	3.82392	0.000131349	0.00305958	1.27379	condition on vs pre
GPR143	GPR143	176.604	TRUE	-3.82386	0.00013138	0.00305958	-1.16134	condition on vs pre
PCDHA2	PCDHA2	79.378	TRUE	-3.82408	0.000131264	0.00305958	-3.06261	condition on vs pre
AC008060.1	AC008060.1	22.8316	TRUE	-3.82348	0.000131584	0.0030597	-3.6859	condition on vs pre
AC087591.1	AC087591.1	9.2118	TRUE	-3.82344	0.000131601	0.0030597	-4.42651	condition on vs pre
TMEM37	TMEM37	1365.64	TRUE	3.82347	0.000131588	0.0030597	2.54411	condition on vs pre
MTTP	MTTP	4458.3	TRUE	3.82306	0.000131806	0.00306277	3.57674	condition on vs pre
KPRP	KPRP	53.8948	TRUE	-3.822	0.000132373	0.00307259	-3.65876	condition on vs pre
LHX8	LHX8	21.1137	TRUE	-3.82202	0.000132362	0.00307259	-3.67935	condition on vs pre
BNIP3P5	BNIP3P5	21.2271	TRUE	3.82172	0.000132523	0.00307429	2.61174	condition on vs pre
CIT	CIT	924.632	TRUE	-3.82159	0.000132592	0.00307429	-1.09748	condition on vs pre
AC021242.2	AC021242.2	89.7148	TRUE	3.82105	0.000132885	0.0030794	3.55194	condition on vs pre
IDNK	IDNK	549.693	TRUE	3.82031	0.000133286	0.00308699	1.93881	condition on vs pre
ACSM3	ACSM3	2361.55	TRUE	3.81911	0.000133933	0.0030969	2.55674	condition on vs pre
HIST1H3G	HIST1H3G	2511.73	TRUE	-3.81918	0.000133895	0.0030969	-2.69131	condition on vs pre
SDHA	SDHA	8511.44	TRUE	3.81938	0.000133788	0.0030969	1.04915	condition on vs pre
OR7A10	OR7A10	19.32	TRUE	-3.81836	0.00013434	0.00310462	-3.87292	condition on vs pre
CRYAB	CRYAB	151.975	TRUE	-3.81822	0.000134417	0.0031047	-1.34347	condition on vs pre
DSCAM-AS1	DSCAM-AS1	3648.16	TRUE	-3.81755	0.000134786	0.00311153	-1.9774	condition on vs pre
WASF3	WASF3	324.79	TRUE	3.81722	0.000134964	0.00311395	1.94523	condition on vs pre
AC009336.2	AC009336.2	80.0407	TRUE	-3.81689	0.000135146	0.00311645	-3.64513	condition on vs pre
ZNF488	ZNF488	33.0187	TRUE	-3.81607	0.000135592	0.00312503	-2.47128	condition on vs pre
ATG2B	ATG2B	4424.96	TRUE	3.81518	0.000136085	0.00313469	1.31886	condition on vs pre
CCDC160	CCDC160	178.445	TRUE	-3.81426	0.000136592	0.00314261	-2.19066	condition on vs pre
PKMYT1	PKMYT1	538.469	TRUE	-3.81402	0.000136726	0.00314261	-2.11503	condition on vs pre
SC5D	SC5D	3906.16	TRUE	3.8141	0.000136681	0.00314261	2.01706	condition on vs pre
TBC1D2	TBC1D2	1246.21	TRUE	3.81403	0.00013672	0.00314261	1.09718	condition on vs pre
ACBD5	ACBD5	2783.94	TRUE	3.81324	0.000137155	0.00315077	1.41624	condition on vs pre
SLC38A11	SLC38A11	253.341	TRUE	3.81275	0.00013743	0.00315538	2.12325	condition on vs pre
AL022313.4	AL022313.4	21.8205	TRUE	-3.8125	0.000137566	0.00315678	-3.93568	condition on vs pre
KRTAP10-12	KRTAP10-12	20.2901	TRUE	-3.81173	0.000137996	0.00316494	-3.7536	condition on vs pre
CYP2C58P	CYP2C58P	23.6495	TRUE	3.81089	0.000138468	0.00317405	3.33206	condition on vs pre
AC005840.3	AC005840.3	22.2548	TRUE	-3.8098	0.000139081	0.00318618	-2.26716	condition on vs pre
NHLH2	NHLH2	51.6337	TRUE	-3.80968	0.000139148	0.00318618	-3.01836	condition on vs pre
FBXL4	FBXL4	2490.45	TRUE	3.80933	0.000139342	0.00318892	1.19012	condition on vs pre
CENPV	CENPV	682.617	TRUE	3.80844	0.000139844	0.00319867	1.44601	condition on vs pre
GATA6	GATA6	527	TRUE	3.80777	0.000140223	0.00320561	1.28185	condition on vs pre
AC016682.1	AC016682.1	131.484	TRUE	3.80763	0.000140303	0.00320571	2.76013	condition on vs pre
ADI1	ADI1	12837.5	TRUE	3.80722	0.000140537	0.00320933	2.22572	condition on vs pre
HOPX	HOPX	775.674	TRUE	-3.8067	0.000140834	0.00321436	-1.80109	condition on vs pre
NUDT7	NUDT7	393.045	TRUE	3.80629	0.000141067	0.00321796	2.10504	condition on vs pre
ALDH3A2	ALDH3A2	6667.5	TRUE	3.80569	0.000141411	0.00322059	1.65995	condition on vs pre
ASB10	ASB10	19.3589	TRUE	-3.80576	0.00014137	0.00322059	-4.23961	condition on vs pre
TTC39C	TTC39C	3386.76	TRUE	3.8059	0.00014129	0.00322059	1.4321	condition on vs pre
AL590483.3	AL590483.3	67.2567	TRUE	-3.80538	0.000141587	0.00322258	-2.4795	condition on vs pre
OR13D3P	OR13D3P	41.3927	TRUE	3.80527	0.00014165	0.00322258	2.4113	condition on vs pre
ACADSB	ACADSB	16214.3	TRUE	3.80416	0.000142288	0.00323536	2.29048	condition on vs pre
AF240627.1	AF240627.1	23.3191	TRUE	-3.80288	0.000143025	0.00325037	-3.96361	condition on vs pre
HSPA8P19	HSPA8P19	54.7206	TRUE	3.80216	0.000143441	0.00325806	1.66138	condition on vs pre
PRC1	PRC1	832.578	TRUE	-3.8014	0.000143879	0.00326627	-1.95841	condition on vs pre
DTX4	DTX4	2059.67	TRUE	3.80082	0.000144217	0.00327218	2.04639	condition on vs pre
CENPK	CENPK	409.703	TRUE	-3.79996	0.000144717	0.00328178	-1.34919	condition on vs pre
HBZ	HBZ	14.086	TRUE	-3.79886	0.000145365	0.00329472	-3.23203	condition on vs pre
THSD8	THSD8	117.088	TRUE	-3.79829	0.0001457	0.00330053	-3.40312	condition on vs pre
RDH10-AS1	RDH10-AS1	286.026	TRUE	3.79815	0.000145783	0.00330065	1.42252	condition on vs pre
IFNAR2	IFNAR2	999.114	TRUE	3.79609	0.000146998	0.00332637	1.3137	condition on vs pre
AC106782.5	AC106782.5	38.0044	TRUE	3.79535	0.000147438	0.00333277	2.51039	condition on vs pre
AGR2	AGR2	6820.97	TRUE	-3.79539	0.000147412	0.00333277	-1.99764	condition on vs pre
SUCLA2P3	SUCLA2P3	21.269	TRUE	-3.79425	0.000148089	0.00334571	-2.44832	condition on vs pre
BOK	BOK	2164.7	TRUE	3.79303	0.000148821	0.00336044	1.67267	condition on vs pre
CLPSL2	CLPSL2	30.3924	TRUE	-3.79268	0.000149032	0.00336343	-3.28996	condition on vs pre
AL356417.2	AL356417.2	8.79739	TRUE	-3.79242	0.000149184	0.00336507	-3.49669	condition on vs pre
AKR1C1	AKR1C1	4979.53	TRUE	3.79199	0.000149447	0.0033674	2.67529	condition on vs pre
DYSF	DYSF	2345.31	TRUE	3.79209	0.000149382	0.0033674	1.66366	condition on vs pre
CRLF1	CRLF1	157.008	TRUE	-3.79055	0.000150314	0.00338514	-1.20735	condition on vs pre
GATA6-AS1	GATA6-AS1	142.619	TRUE	3.79027	0.000150481	0.00338533	1.96418	condition on vs pre
MIR3150BHG	MIR3150BHG	183.576	TRUE	-3.79027	0.000150482	0.00338533	-1.70793	condition on vs pre
PAN2	PAN2	3366.61	TRUE	3.78896	0.000151278	0.00340143	1.40828	condition on vs pre
AC006329.2	AC006329.2	33.3353	TRUE	3.78619	0.000152974	0.00343773	3.02341	condition on vs pre
GPR84	GPR84	61.6059	TRUE	-3.78541	0.000153458	0.00344678	-1.70761	condition on vs pre
DAO	DAO	1113.81	TRUE	3.7847	0.000153896	0.0034548	3.61226	condition on vs pre
SS18L1	SS18L1	2071.51	TRUE	3.78351	0.000154634	0.00346953	1.1484	condition on vs pre
APOBEC3B	APOBEC3B	242.035	TRUE	-3.78169	0.000155766	0.00349306	-1.66553	condition on vs pre
CRY2	CRY2	3542	TRUE	3.7795	0.000157141	0.00352204	1.35192	condition on vs pre
AC117489.1	AC117489.1	44.62	TRUE	-3.77921	0.000157328	0.00352437	-1.84061	condition on vs pre
DSG1	DSG1	500.927	TRUE	3.77905	0.000157427	0.00352471	3.35241	condition on vs pre
AC004022.2	AC004022.2	22.7781	TRUE	3.77777	0.000158236	0.00354096	3.02487	condition on vs pre
RTKN2	RTKN2	446.558	TRUE	-3.7767	0.000158922	0.00355443	-2.15267	condition on vs pre
AC073114.1	AC073114.1	18.6503	TRUE	-3.77644	0.000159085	0.00355621	-4.46568	condition on vs pre
IBTK	IBTK	4301.49	TRUE	3.77581	0.000159489	0.00356335	1.02797	condition on vs pre
NEBL-AS1	NEBL-AS1	35.0296	TRUE	-3.77409	0.000160595	0.00358617	-2.02916	condition on vs pre
AC020558.2	AC020558.2	27.2385	TRUE	3.77333	0.000161083	0.00359518	2.27758	condition on vs pre
ASPHD1	ASPHD1	61.9957	TRUE	-3.77274	0.000161466	0.00359993	-1.63962	condition on vs pre
SYT3	SYT3	60.9353	TRUE	-3.77284	0.000161398	0.00359993	-2.46772	condition on vs pre
SEPHS2	SEPHS2	5416.27	TRUE	3.77106	0.000162555	0.00362229	1.69111	condition on vs pre
CDA	CDA	274.027	TRUE	3.77	0.000163248	0.00363392	2.87347	condition on vs pre
MICU1	MICU1	2326.19	TRUE	3.77003	0.000163225	0.00363392	1.25597	condition on vs pre
PTK2B	PTK2B	2210.34	TRUE	3.76793	0.000164604	0.00366217	1.1944	condition on vs pre
HIST1H3C	HIST1H3C	5320.19	TRUE	-3.7673	0.000165025	0.00366962	-2.6602	condition on vs pre
AC126773.2	AC126773.2	19.5689	TRUE	-3.76688	0.0001653	0.00367381	-2.84246	condition on vs pre
IFNAR1	IFNAR1	4453.55	TRUE	3.76663	0.000165465	0.00367554	0.864491	condition on vs pre
CST2	CST2	52.0939	TRUE	-3.76637	0.000165639	0.00367748	-1.85432	condition on vs pre
PRSS48	PRSS48	56.5695	TRUE	3.76559	0.000166157	0.00368705	1.60326	condition on vs pre
HHEX	HHEX	989.829	TRUE	3.76514	0.000166458	0.00369179	2.342	condition on vs pre
AL121827.1	AL121827.1	98.2788	TRUE	3.7649	0.000166614	0.00369331	3.65505	condition on vs pre
SLC22A9	SLC22A9	678.4	TRUE	3.76427	0.000167035	0.00370071	3.67305	condition on vs pre
GABRR1	GABRR1	31.4075	TRUE	-3.76288	0.00016797	0.00371949	-3.25022	condition on vs pre
CTSLP2	CTSLP2	20.9033	TRUE	3.76267	0.000168112	0.00372069	3.57888	condition on vs pre
Z84468.1	Z84468.1	29.5916	TRUE	-3.76245	0.000168258	0.00372197	-2.68842	condition on vs pre
AC017000.1	AC017000.1	24.7285	TRUE	3.76219	0.000168429	0.0037238	3.09282	condition on vs pre
TRPM7	TRPM7	7545.87	TRUE	3.76142	0.000168952	0.00373342	1.26241	condition on vs pre
PDE3B	PDE3B	3518.76	TRUE	3.76088	0.000169316	0.00373951	1.70232	condition on vs pre
AP003025.2	AP003025.2	21.0918	TRUE	-3.76071	0.000169432	0.00374013	-3.17817	condition on vs pre
PPP1R1B	PPP1R1B	2543.99	TRUE	-3.7605	0.000169572	0.00374127	-3.76472	condition on vs pre
CLPSL1	CLPSL1	61.5855	TRUE	-3.76012	0.000169833	0.00374507	-3.28231	condition on vs pre
FAHD2A	FAHD2A	2134.52	TRUE	3.7591	0.000170528	0.0037559	1.55642	condition on vs pre
MTCYBP13	MTCYBP13	19.6092	TRUE	-3.75922	0.000170442	0.0037559	-3.75947	condition on vs pre
SERPINA6	SERPINA6	6596.53	TRUE	3.75901	0.00017059	0.0037559	3.24518	condition on vs pre
U91324.1	U91324.1	136.758	TRUE	3.75879	0.00017074	0.00375726	3.25373	condition on vs pre
HIBCH	HIBCH	2310.51	TRUE	3.75784	0.00017139	0.00376959	1.16383	condition on vs pre
CFAP206	CFAP206	100.102	TRUE	-3.75769	0.000171492	0.00376988	-1.86674	condition on vs pre
CCDC140	CCDC140	29.0954	TRUE	-3.75687	0.000172051	0.00378021	-3.27467	condition on vs pre
AC138150.2	AC138150.2	95.3422	TRUE	-3.75625	0.00017248	0.00378768	-1.27045	condition on vs pre
CLDN2	CLDN2	739.998	TRUE	3.75557	0.00017295	0.00379602	2.68274	condition on vs pre
RN7SKP283	RN7SKP283	22.1551	TRUE	3.75493	0.000173386	0.00380364	3.09237	condition on vs pre
AC092118.2	AC092118.2	29.7861	TRUE	3.75337	0.000174475	0.00382554	1.85224	condition on vs pre
ENPP1	ENPP1	6694.73	TRUE	3.75316	0.000174621	0.00382675	1.16945	condition on vs pre
AL035696.1	AL035696.1	27.6954	TRUE	-3.75286	0.000174831	0.00382938	-3.30213	condition on vs pre
AC129507.3	AC129507.3	48.2345	TRUE	3.75252	0.000175063	0.00383247	1.94315	condition on vs pre
AL133419.1	AL133419.1	14.3289	TRUE	3.75185	0.000175536	0.00384085	3.73835	condition on vs pre
CYP1A1	CYP1A1	307.175	TRUE	3.75152	0.000175765	0.00384387	3.53985	condition on vs pre
SLC26A4-AS1	SLC26A4-AS1	46.7331	TRUE	-3.7498	0.000176975	0.00386833	-2.30671	condition on vs pre
NUP88	NUP88	2364.41	TRUE	3.74965	0.00017708	0.00386863	0.892412	condition on vs pre
LINC01837	LINC01837	46.9446	TRUE	-3.74911	0.000177465	0.00387504	-3.27163	condition on vs pre
RNFT2	RNFT2	803.034	TRUE	-3.74849	0.000177903	0.00388261	-1.48289	condition on vs pre
HELZ	HELZ	7154.09	TRUE	3.74801	0.000178241	0.00388799	1.07682	condition on vs pre
AC078925.4	AC078925.4	36.0673	TRUE	3.74741	0.00017867	0.00389533	2.19338	condition on vs pre
CDIPTOSP	CDIPTOSP	18.233	TRUE	-3.74717	0.000178843	0.00389711	-3.27203	condition on vs pre
MAGI2-AS3	MAGI2-AS3	1223.78	TRUE	3.74669	0.000179181	0.00390246	1.67819	condition on vs pre
AL139010.1	AL139010.1	26.0825	TRUE	-3.74612	0.000179591	0.00390695	-3.28428	condition on vs pre
GYS2	GYS2	3275.9	TRUE	3.74602	0.000179664	0.00390695	4.90069	condition on vs pre
PPEF1	PPEF1	73.9438	TRUE	-3.74617	0.000179554	0.00390695	-1.86923	condition on vs pre
S100P	S100P	2070.31	TRUE	-3.74562	0.000179952	0.0039112	-2.84248	condition on vs pre
ADAMTS6	ADAMTS6	234.519	TRUE	-3.74463	0.000180661	0.00392427	-1.41218	condition on vs pre
AP000462.2	AP000462.2	67.587	TRUE	3.74452	0.000180738	0.00392427	1.92518	condition on vs pre
SNRPGP4	SNRPGP4	48.5818	TRUE	3.74346	0.000181506	0.00393891	1.65793	condition on vs pre
LHX5	LHX5	30.6811	TRUE	-3.74314	0.000181734	0.00394185	-3.68661	condition on vs pre
AC073488.9	AC073488.9	24.9721	TRUE	-3.7424	0.000182272	0.00394757	-4.05332	condition on vs pre
AC092850.1	AC092850.1	38.9424	TRUE	-3.74239	0.000182277	0.00394757	-3.05542	condition on vs pre
CDC42P6	CDC42P6	18.339	TRUE	3.74244	0.000182244	0.00394757	3.26003	condition on vs pre
LINC01554	LINC01554	734.346	TRUE	3.7416	0.00018285	0.00395795	2.01614	condition on vs pre
AC008537.3	AC008537.3	651.755	TRUE	3.74133	0.000183051	0.00396027	1.9862	condition on vs pre
AC130686.1	AC130686.1	37.4437	TRUE	-3.74067	0.000183529	0.0039686	-1.88504	condition on vs pre
ZBTB20-AS5	ZBTB20-AS5	136.481	TRUE	3.74005	0.000183982	0.00397636	1.63964	condition on vs pre
ANXA10	ANXA10	651.829	TRUE	3.73943	0.000184435	0.00398412	3.70632	condition on vs pre
CAMK2N1	CAMK2N1	1276.03	TRUE	3.73912	0.000184667	0.0039871	1.114	condition on vs pre
AC006037.2	AC006037.2	192.389	TRUE	3.73881	0.000184894	0.00398995	3.51208	condition on vs pre
AC112249.1	AC112249.1	59.3163	TRUE	3.73816	0.000185373	0.00399826	3.13002	condition on vs pre
AC239600.2	AC239600.2	17.8379	TRUE	-3.73791	0.000185559	0.00400024	-3.65094	condition on vs pre
BEST4	BEST4	39.2548	TRUE	-3.73671	0.00018644	0.00401456	-1.50219	condition on vs pre
C16orf86	C16orf86	107.552	TRUE	3.73662	0.000186508	0.00401456	1.47855	condition on vs pre
DUSP26	DUSP26	25.8459	TRUE	-3.73684	0.000186347	0.00401456	-2.38006	condition on vs pre
MOCOS	MOCOS	2147.9	TRUE	3.7364	0.00018667	0.00401601	1.54433	condition on vs pre
LINC00173	LINC00173	140.727	TRUE	-3.73445	0.000188126	0.00404529	-2.95017	condition on vs pre
CHODL	CHODL	54.248	TRUE	-3.73372	0.000188669	0.0040549	-3.73788	condition on vs pre
AL031777.3	AL031777.3	5566.29	TRUE	-3.73355	0.000188802	0.0040557	-2.15378	condition on vs pre
MT1G	MT1G	7159.75	TRUE	3.73328	0.000189001	0.00405792	4.67791	condition on vs pre
AL096828.2	AL096828.2	27.3034	TRUE	-3.73294	0.000189258	0.00406137	-3.40517	condition on vs pre
CASC10	CASC10	531.378	TRUE	3.73245	0.000189627	0.00406723	2.57618	condition on vs pre
SCUBE1	SCUBE1	1796.26	TRUE	-3.7321	0.000189891	0.00407083	-1.70718	condition on vs pre
RAB14	RAB14	3617.89	TRUE	3.73091	0.000190786	0.00408796	0.937754	condition on vs pre
TMEM220-AS1	TMEM220-AS1	195.751	TRUE	3.72958	0.000191799	0.00410759	2.95153	condition on vs pre
CD1A	CD1A	37.0129	TRUE	-3.72741	0.000193456	0.00414097	-2.42215	condition on vs pre
AC104809.1	AC104809.1	334.106	TRUE	3.7268	0.00019393	0.00414484	3.03455	condition on vs pre
LRRC73	LRRC73	95.3942	TRUE	-3.72689	0.000193861	0.00414484	-1.57933	condition on vs pre
MYLK2	MYLK2	29.8976	TRUE	-3.72696	0.000193804	0.00414484	-2.52735	condition on vs pre
AL117382.2	AL117382.2	47.2587	TRUE	3.72657	0.000194104	0.00414646	3.67231	condition on vs pre
AL445675.1	AL445675.1	22.3565	TRUE	-3.72632	0.000194297	0.0041485	-4.24446	condition on vs pre
AC087482.1	AC087482.1	340.407	TRUE	3.72527	0.000195103	0.00416361	3.02689	condition on vs pre
AL355096.1	AL355096.1	32.0329	TRUE	3.72505	0.000195273	0.00416514	3.86934	condition on vs pre
LARP1B	LARP1B	2828.2	TRUE	3.72469	0.000195552	0.00416898	1.40867	condition on vs pre
AL360267.1	AL360267.1	14.5204	TRUE	3.72305	0.000196834	0.00419421	4.28117	condition on vs pre
HMGCL	HMGCL	3695.54	TRUE	3.72167	0.000197907	0.00421144	1.8795	condition on vs pre
KREMEN2	KREMEN2	115.727	TRUE	-3.72163	0.000197941	0.00421144	-2.28696	condition on vs pre
TK2	TK2	1690.49	TRUE	3.7218	0.000197811	0.00421144	1.12085	condition on vs pre
CKS2	CKS2	660.948	TRUE	-3.72143	0.000198094	0.00421258	-2.09905	condition on vs pre
LINC02197	LINC02197	380.557	TRUE	3.72008	0.000199159	0.00423311	2.06752	condition on vs pre
KRT12	KRT12	64.4143	TRUE	-3.71855	0.00020037	0.0042567	-3.34722	condition on vs pre
YBX1P9	YBX1P9	13.1555	TRUE	-3.71806	0.000200758	0.00426281	-4.17311	condition on vs pre
TRAM1L1	TRAM1L1	121.121	TRUE	-3.71783	0.000200944	0.00426463	-1.73067	condition on vs pre
IL18R1	IL18R1	288.302	TRUE	3.71731	0.000201353	0.00427117	2.00972	condition on vs pre
AC093423.3	AC093423.3	4.55261	TRUE	3.71691	0.000201671	0.00427577	5.46904	condition on vs pre
BMPER	BMPER	454.159	TRUE	3.7166	0.000201921	0.00427893	2.64076	condition on vs pre
[truncated: 48,368 more rows]

## Sheet: Table S10 on_pre Alpelisib
symbol	baseMean	FDR_significant	stat	pvalue	padj	log2FoldChange	description		Table S10. Differential expressed genes in patient cohorts (GDC0077 and Alpelisib)
BHMT	2530.09	TRUE	-16.8044	2.26495e-63	5.09115e-59	-6.11647	condition on vs pre
SLC22A1	2213.89	TRUE	-16.6547	2.79579e-62	3.14219e-58	-6.18473	condition on vs pre
GJB1	1730.89	TRUE	-16.1491	1.15181e-58	8.63016e-55	-6.53723	condition on vs pre
CPS1	5679.96	TRUE	-15.907	5.66602e-57	3.18402e-53	-5.95654	condition on vs pre
CYP4A11	3655.97	TRUE	-15.8823	8.39917e-57	3.77593e-53	-6.89172	condition on vs pre
CFHR2	3449.94	TRUE	-15.1641	6.11343e-52	2.2903e-48	-6.55109	condition on vs pre
ADH1B	29139.5	TRUE	-15.0376	4.16399e-51	1.33712e-47	-8.11252	condition on vs pre
UGT2B7	1935.02	TRUE	-14.9261	2.22973e-50	6.26498e-47	-7.10671	condition on vs pre
ARG1	2281.6	TRUE	-14.853	6.65377e-50	1.57386e-46	-6.90355	condition on vs pre
PCK1	9388.96	TRUE	-14.8496	7.00179e-50	1.57386e-46	-7.96862	condition on vs pre
PROC	2719.96	TRUE	-14.6697	1.00826e-48	2.06032e-45	-5.95624	condition on vs pre
CYP3A4	13875.1	TRUE	-14.5075	1.08587e-47	2.03402e-44	-7.69365	condition on vs pre
C3	75930.5	TRUE	-14.2317	5.82597e-46	1.00736e-42	-5.39046	condition on vs pre
ADH6	1184.51	TRUE	-14.2057	8.44394e-46	1.31629e-42	-6.83865	condition on vs pre
SERPINF2	11052.4	TRUE	-14.2029	8.78384e-46	1.31629e-42	-6.29225	condition on vs pre
SULT2A1	2588.69	TRUE	-14.1861	1.11765e-45	1.57016e-42	-6.00818	condition on vs pre
TAT	6315.77	TRUE	-14.1009	3.74919e-45	4.95732e-42	-6.17186	condition on vs pre
APOC4-APOC2	2929.54	TRUE	-13.9114	5.40196e-44	6.74585e-41	-6.26976	condition on vs pre
RGN	1709.72	TRUE	-13.8282	1.72191e-43	2.03711e-40	-5.88809	condition on vs pre
SERPINC1	12792	TRUE	-13.7104	8.79883e-43	9.889e-40	-7.67612	condition on vs pre
ITIH3	11307	TRUE	-13.6758	1.4173e-42	1.51705e-39	-7.06241	condition on vs pre
AGXT	11223.3	TRUE	-13.6722	1.48831e-42	1.52065e-39	-7.26305	condition on vs pre
CYP8B1	1671.57	TRUE	-13.4988	1.58932e-41	1.55325e-38	-5.5484	condition on vs pre
CYP4A22	1349.5	TRUE	-13.4066	5.52811e-41	5.17754e-38	-5.47558	condition on vs pre
CYP2C9	6695.12	TRUE	-13.3188	1.80032e-40	1.61871e-37	-6.92963	condition on vs pre
HRG	12354.2	TRUE	-13.242	5.02178e-40	4.34152e-37	-6.72695	condition on vs pre
ACSM2A	2739.26	TRUE	-13.1804	1.13861e-39	9.46605e-37	-5.45803	condition on vs pre
AFM	2296.73	TRUE	-13.1777	1.17915e-39	9.46605e-37	-7.63496	condition on vs pre
APOC4	794.876	TRUE	-13.1679	1.34347e-39	1.04133e-36	-6.83402	condition on vs pre
C6	2879.96	TRUE	-13.0467	6.63507e-39	4.97144e-36	-7.92592	condition on vs pre
HSD17B6	2656.61	TRUE	-13.0268	8.61399e-39	6.24598e-36	-5.01593	condition on vs pre
HAO2	914.238	TRUE	-13.0172	9.77361e-39	6.86535e-36	-7.27039	condition on vs pre
SLC10A1	1522.5	TRUE	-13.004	1.16146e-38	7.91127e-36	-7.65819	condition on vs pre
APOA5	3169.9	TRUE	-12.8544	8.12253e-38	5.36994e-35	-8.1787	condition on vs pre
DPYS	1901.21	TRUE	-12.7511	3.07433e-37	1.97442e-34	-8.08004	condition on vs pre
ALDOB	25823.5	TRUE	-12.7471	3.23637e-37	2.02075e-34	-8.05129	condition on vs pre
ALDH1L1	4217.56	TRUE	-12.6895	6.76024e-37	4.06413e-34	-6.30834	condition on vs pre
CPN2	1106.69	TRUE	-12.6882	6.87058e-37	4.06413e-34	-5.36793	condition on vs pre
AOX1	4995.53	TRUE	-12.6382	1.30077e-36	7.4971e-34	-6.22854	condition on vs pre
PLA2G2A	1294.89	TRUE	-12.6226	1.58577e-36	8.91121e-34	-7.02913	condition on vs pre
ORM1	36086.4	TRUE	-12.6134	1.78056e-36	9.76183e-34	-8.18286	condition on vs pre
HPX	17864.8	TRUE	-12.5662	3.24064e-36	1.73436e-33	-4.7929	condition on vs pre
CYP2C8	5619.34	TRUE	-12.4631	1.18677e-35	6.20379e-33	-7.5553	condition on vs pre
APOM	1865.3	TRUE	-12.3861	3.10899e-35	1.58827e-32	-4.66439	condition on vs pre
ASGR2	4398.19	TRUE	-12.3323	6.06635e-35	3.03021e-32	-7.1045	condition on vs pre
GPX3	6260.77	TRUE	-12.275	1.23327e-34	6.02639e-32	-4.15972	condition on vs pre
NR1I3	932.669	TRUE	-12.2171	2.51793e-34	1.20421e-31	-5.84566	condition on vs pre
APOA1	58916.4	TRUE	-12.0969	1.09656e-33	5.13512e-31	-7.81495	condition on vs pre
SAA4	1980.13	TRUE	-12.078	1.3805e-33	6.33283e-31	-7.48711	condition on vs pre
CYP2E1	23286.5	TRUE	-12.0681	1.55617e-33	6.99593e-31	-6.27277	condition on vs pre
CYP2C19	1017.69	TRUE	-12.043	2.11118e-33	9.30493e-31	-4.9761	condition on vs pre
APOC3	29617.4	TRUE	-12.0318	2.41735e-33	1.04495e-30	-8.14414	condition on vs pre
ACOT12	510.528	TRUE	-11.9195	9.37249e-33	3.975e-30	-7.48202	condition on vs pre
AQP9	1743.77	TRUE	-11.892	1.30188e-32	5.41919e-30	-6.36517	condition on vs pre
CYP39A1	513.807	TRUE	-11.851	2.12752e-32	8.69497e-30	-6.50799	condition on vs pre
C9	4416.7	TRUE	-11.8389	2.45786e-32	9.86568e-30	-8.17297	condition on vs pre
F2	7818.86	TRUE	-11.8041	3.71566e-32	1.44196e-29	-7.56615	condition on vs pre
FABP1	7298.41	TRUE	-11.804	3.72068e-32	1.44196e-29	-7.8774	condition on vs pre
FGL1	13676.6	TRUE	-11.7796	4.97179e-32	1.89417e-29	-7.95394	condition on vs pre
ORM2	10408.9	TRUE	-11.755	6.65292e-32	2.49241e-29	-8.26389	condition on vs pre
SLC39A5	902.367	TRUE	-11.7474	7.28181e-32	2.68329e-29	-5.46171	condition on vs pre
AKR1C4	1082.4	TRUE	-11.7155	1.06195e-31	3.85008e-29	-7.66818	condition on vs pre
SAA1	6566.52	TRUE	-11.6783	1.64472e-31	5.86827e-29	-6.5844	condition on vs pre
HPD	6750.94	TRUE	-11.6637	1.95391e-31	6.86249e-29	-6.89437	condition on vs pre
TF	69768.9	TRUE	-11.6421	2.51692e-31	8.70389e-29	-7.69304	condition on vs pre
ACSM2B	3481.92	TRUE	-11.64	2.57999e-31	8.78683e-29	-6.82072	condition on vs pre
TTR	15941.1	TRUE	-11.6181	3.33525e-31	1.11895e-28	-8.02939	condition on vs pre
SLC22A7	3294.76	TRUE	-11.5951	4.36464e-31	1.44277e-28	-8.11442	condition on vs pre
CYP2B6	1050.29	TRUE	-11.5482	7.53469e-31	2.45456e-28	-5.61951	condition on vs pre
CFHR1	4646.75	TRUE	-11.509	1.18814e-30	3.8153e-28	-5.01974	condition on vs pre
HP	145632	TRUE	-11.5053	1.24045e-30	3.92716e-28	-7.86366	condition on vs pre
SLCO1B3	670.999	TRUE	-11.4723	1.81852e-30	5.67732e-28	-7.98866	condition on vs pre
SERPINA10	2070.61	TRUE	-11.4343	2.81844e-30	8.67848e-28	-5.88529	condition on vs pre
F10	1328.31	TRUE	-11.4076	3.82978e-30	1.15947e-27	-4.84583	condition on vs pre
SLC13A5	3253.51	TRUE	-11.4068	3.86868e-30	1.15947e-27	-5.46567	condition on vs pre
PAH	4898.16	TRUE	-11.3953	4.41321e-30	1.30526e-27	-7.67289	condition on vs pre
ADH1C	5948.09	TRUE	-11.3616	6.49163e-30	1.89505e-27	-7.4521	condition on vs pre
C3P1	2385.42	TRUE	-11.3464	7.73099e-30	2.22791e-27	-7.54361	condition on vs pre
F9	1262.96	TRUE	-11.3434	8.00034e-30	2.27635e-27	-7.50977	condition on vs pre
CYP3A5	3803.77	TRUE	-11.3391	8.40478e-30	2.36153e-27	-4.37996	condition on vs pre
MAT1A	8612.28	TRUE	-11.2508	2.29515e-29	6.36918e-27	-7.38588	condition on vs pre
ITIH2	7370.61	TRUE	-11.2364	2.70033e-29	7.40221e-27	-7.32719	condition on vs pre
ALB	377737	TRUE	-11.233	2.80721e-29	7.51195e-27	-7.98512	condition on vs pre
FTCD	5515.83	TRUE	-11.2332	2.80181e-29	7.51195e-27	-7.01711	condition on vs pre
ADH4	10502.9	TRUE	-11.2158	3.41185e-29	9.02253e-27	-7.47614	condition on vs pre
AMBP	43114	TRUE	-11.1476	7.35921e-29	1.90622e-26	-7.34665	condition on vs pre
SERPINA7	1307.64	TRUE	-11.1473	7.37793e-29	1.90622e-26	-9.42845	condition on vs pre
C8A	2895.89	TRUE	-11.1302	8.94311e-29	2.28435e-26	-7.63946	condition on vs pre
HSD11B1	1888.63	TRUE	-11.1275	9.21451e-29	2.32723e-26	-6.37995	condition on vs pre
HABP2	2021.66	TRUE	-11.0987	1.27316e-28	3.17978e-26	-7.28031	condition on vs pre
GLYAT	838.663	TRUE	-11.0824	1.52763e-28	3.77341e-26	-7.22661	condition on vs pre
MOGAT2	490.764	TRUE	-11.0706	1.74191e-28	4.25594e-26	-7.17146	condition on vs pre
CREB3L3	932.17	TRUE	-11.0668	1.81774e-28	4.39346e-26	-6.91406	condition on vs pre
KLKB1	1159.7	TRUE	-11.0588	1.9869e-28	4.75122e-26	-5.68173	condition on vs pre
APOC2	12701.2	TRUE	-11.0443	2.33675e-28	5.529e-26	-5.76966	condition on vs pre
MLXIPL	4197.51	TRUE	-11.0412	2.41786e-28	5.66132e-26	-5.91933	condition on vs pre
ASGR1	6112.93	TRUE	-11.0328	2.65421e-28	6.15065e-26	-5.6846	condition on vs pre
APOA2	35327.6	TRUE	-11.0226	2.97189e-28	6.81655e-26	-7.85793	condition on vs pre
G6PC	1418.96	TRUE	-10.9763	4.96657e-28	1.12766e-25	-6.58964	condition on vs pre
APOH	21106.5	TRUE	-10.9383	7.56025e-28	1.68793e-25	-7.74441	condition on vs pre
HAO1	1655.49	TRUE	-10.938	7.58437e-28	1.68793e-25	-8.12283	condition on vs pre
MTND4P20	375.435	TRUE	-10.9208	9.16366e-28	2.01942e-25	-6.99556	condition on vs pre
UROC1	583.296	TRUE	-10.9145	9.82823e-28	2.14484e-25	-7.23911	condition on vs pre
PLG	13984.7	TRUE	-10.8845	1.36631e-27	2.95306e-25	-7.38217	condition on vs pre
FAM99A	1653	TRUE	-10.8824	1.39848e-27	2.99381e-25	-7.62364	condition on vs pre
ABCG5	1312.36	TRUE	-10.8779	1.4694e-27	3.08683e-25	-6.67281	condition on vs pre
OGDHL	1324.32	TRUE	-10.8786	1.45863e-27	3.08683e-25	-5.50229	condition on vs pre
GSTA2	1542.8	TRUE	-10.8743	1.52748e-27	3.17913e-25	-7.27351	condition on vs pre
HNF4A	1620.57	TRUE	-10.8326	2.4117e-27	4.97341e-25	-7.10557	condition on vs pre
MASP1	851.383	TRUE	-10.8061	3.21957e-27	6.57905e-25	-4.55034	condition on vs pre
CLDN1	1472.55	TRUE	-10.7652	5.0272e-27	1.01803e-24	-4.22773	condition on vs pre
SLC25A18	838.115	TRUE	-10.7596	5.33893e-27	1.0715e-24	-5.34876	condition on vs pre
APCS	5864.9	TRUE	-10.7314	7.24938e-27	1.44205e-24	-7.93395	condition on vs pre
SLC28A1	452.934	TRUE	-10.7171	8.46489e-27	1.66907e-24	-5.62858	condition on vs pre
FGB	52383.9	TRUE	-10.7017	9.98884e-27	1.95243e-24	-7.64849	condition on vs pre
HSD17B13	1700.96	TRUE	-10.6269	2.23427e-26	4.32947e-24	-4.94267	condition on vs pre
FGA	63375.5	TRUE	-10.6184	2.44636e-26	4.69076e-24	-7.74999	condition on vs pre
SLC38A4	1600.27	TRUE	-10.6178	2.46245e-26	4.69076e-24	-5.94442	condition on vs pre
CES1	9153.08	TRUE	-10.5224	6.80975e-26	1.2863e-23	-5.78399	condition on vs pre
AGT	6019.38	TRUE	-10.5204	6.95459e-26	1.30271e-23	-5.89822	condition on vs pre
UBD	1147.51	TRUE	-10.5068	8.03777e-26	1.49317e-23	-4.26149	condition on vs pre
FGG	39749.9	TRUE	-10.5033	8.34266e-26	1.5371e-23	-7.84464	condition on vs pre
LBP	2455.13	TRUE	-10.4823	1.04156e-25	1.90343e-23	-6.56489	condition on vs pre
C4BPB	2312.7	TRUE	-10.4621	1.28912e-25	2.33685e-23	-4.88556	condition on vs pre
GC	14401.4	TRUE	-10.41	2.2327e-25	4.01494e-23	-8.11908	condition on vs pre
SLC25A47	2061.58	TRUE	-10.3987	2.51429e-25	4.48541e-23	-7.52808	condition on vs pre
METTL7B	500.379	TRUE	-10.3427	4.51564e-25	7.99232e-23	-6.86926	condition on vs pre
ADH1A	6186.9	TRUE	-10.3307	5.11989e-25	8.991e-23	-7.42531	condition on vs pre
ITIH1	11975	TRUE	-10.3268	5.33132e-25	9.28973e-23	-7.6496	condition on vs pre
KNG1	11883.4	TRUE	-10.2988	7.13481e-25	1.23366e-22	-7.9977	condition on vs pre
SLC2A2	1801.16	TRUE	-10.29	7.81791e-25	1.34146e-22	-7.81059	condition on vs pre
APOB	18651.5	TRUE	-10.2764	8.99935e-25	1.53248e-22	-7.80026	condition on vs pre
CYP2A6	9736.05	TRUE	-10.2707	9.54787e-25	1.61366e-22	-8.06409	condition on vs pre
PRAP1	2414.15	TRUE	-10.2159	1.68302e-24	2.8232e-22	-6.77266	condition on vs pre
GBP7	405.598	TRUE	-10.2083	1.82044e-24	3.03109e-22	-6.59892	condition on vs pre
AHSG	19203.5	TRUE	-10.1888	2.22506e-24	3.67756e-22	-7.6734	condition on vs pre
UGT2B15	1924.27	TRUE	-10.1774	2.50085e-24	4.10321e-22	-6.36628	condition on vs pre
FXYD1	777.396	TRUE	-10.1021	5.40458e-24	8.80319e-22	-4.76914	condition on vs pre
BAAT	3723.54	TRUE	-10.0966	5.72103e-24	9.25161e-22	-7.91722	condition on vs pre
A1BG	14821.6	TRUE	-10.075	7.12561e-24	1.14407e-21	-4.18486	condition on vs pre
AC012313.3	1506.21	TRUE	-10.0699	7.50282e-24	1.19609e-21	-4.0744	condition on vs pre
GSTA1	3058.11	TRUE	-9.9988	1.54253e-23	2.44176e-21	-8.07587	condition on vs pre
G0S2	1320.62	TRUE	-9.99467	1.60829e-23	2.52806e-21	-4.55945	condition on vs pre
SAA2	3226.22	TRUE	-9.98744	1.72994e-23	2.70039e-21	-5.97547	condition on vs pre
LPA	542.58	TRUE	-9.93086	3.05619e-23	4.73772e-21	-7.2062	condition on vs pre
CUX2	334.335	TRUE	-9.92612	3.205e-23	4.93438e-21	-6.50089	condition on vs pre
SERPIND1	2635.48	TRUE	-9.92134	3.36207e-23	5.14099e-21	-7.53215	condition on vs pre
INHBE	550.059	TRUE	-9.85543	6.49379e-23	9.86266e-21	-4.77387	condition on vs pre
CYP2D6	1865.21	TRUE	-9.81622	9.58727e-23	1.44633e-20	-4.26193	condition on vs pre
HGFAC	2835.73	TRUE	-9.79994	1.12654e-22	1.68816e-20	-5.89053	condition on vs pre
PCSK9	1644.07	TRUE	-9.79699	1.15995e-22	1.72671e-20	-6.59006	condition on vs pre
AGXT2	366.773	TRUE	-9.79319	1.20433e-22	1.78098e-20	-6.6903	condition on vs pre
HJV	555.751	TRUE	-9.78884	1.25724e-22	1.84707e-20	-7.48274	condition on vs pre
SLPI	547.477	TRUE	-9.76582	1.57838e-22	2.30381e-20	-5.15531	condition on vs pre
C4BPA	7047.33	TRUE	-9.74646	1.91014e-22	2.77007e-20	-7.40511	condition on vs pre
AADAC	963.314	TRUE	-9.72374	2.38847e-22	3.44154e-20	-7.28505	condition on vs pre
GCGR	1018.09	TRUE	-9.71186	2.68407e-22	3.84283e-20	-7.31397	condition on vs pre
PPP1R1A	1227.18	TRUE	-9.66839	4.10778e-22	5.84397e-20	-7.00122	condition on vs pre
A1CF	1074.36	TRUE	-9.66142	4.39731e-22	6.21652e-20	-6.82775	condition on vs pre
MIR122HG	699.137	TRUE	-9.64517	5.15244e-22	7.23853e-20	-5.14474	condition on vs pre
FETUB	762.162	TRUE	-9.63751	5.55195e-22	7.75134e-20	-9.23474	condition on vs pre
HPR	3137.76	TRUE	-9.63061	5.93733e-22	8.23823e-20	-8.09379	condition on vs pre
SAA2-SAA4	489.136	TRUE	-9.53164	1.54819e-21	2.13498e-19	-7.43708	condition on vs pre
ABCC6	1320.19	TRUE	-9.51303	1.85183e-21	2.53813e-19	-4.78974	condition on vs pre
TFR2	4854.41	TRUE	-9.49771	2.14557e-21	2.92291e-19	-5.72933	condition on vs pre
TM4SF5	859.814	TRUE	-9.48024	2.53696e-21	3.43529e-19	-6.63758	condition on vs pre
DBH-AS1	754.681	TRUE	-9.46956	2.81032e-21	3.78266e-19	-3.97819	condition on vs pre
ACMSD	413.559	TRUE	-9.39835	5.54247e-21	7.41569e-19	-5.83367	condition on vs pre
BCHE	544.714	TRUE	-9.37169	7.13798e-21	9.49394e-19	-5.16226	condition on vs pre
LINC00261	400.505	TRUE	-9.36759	7.42041e-21	9.81153e-19	-8.23994	condition on vs pre
SERPINA4	1398.94	TRUE	-9.33962	9.66844e-21	1.27092e-18	-7.9416	condition on vs pre
UGT1A1	2226.45	TRUE	-9.32776	1.08128e-20	1.41308e-18	-5.40925	condition on vs pre
UGT3A1	470.07	TRUE	-9.31172	1.25776e-20	1.63422e-18	-7.2014	condition on vs pre
GCKR	486.132	TRUE	-9.3035	1.35899e-20	1.75559e-18	-4.75135	condition on vs pre
F13B	599.532	TRUE	-9.29044	1.53652e-20	1.9736e-18	-8.00081	condition on vs pre
PRG4	808.269	TRUE	-9.27229	1.82193e-20	2.32689e-18	-6.11053	condition on vs pre
BHMT2	2743.74	TRUE	-9.07288	1.15908e-19	1.47196e-17	-4.64425	condition on vs pre
FMO3	3528.33	TRUE	-9.0617	1.28433e-19	1.62187e-17	-4.59607	condition on vs pre
UGT2B4	2424.04	TRUE	-9.05241	1.3985e-19	1.75618e-17	-6.45743	condition on vs pre
CFI	3798.05	TRUE	-9.02903	1.73204e-19	2.16294e-17	-4.51231	condition on vs pre
PON1	2713.73	TRUE	-9.01674	1.93761e-19	2.40628e-17	-6.61221	condition on vs pre
CFHR3	1912.86	TRUE	-9.0109	2.04381e-19	2.52422e-17	-6.37465	condition on vs pre
NEU4	415.65	TRUE	-8.97473	2.8406e-19	3.48913e-17	-5.22059	condition on vs pre
AC006254.1	2156.16	TRUE	-8.95213	3.48673e-19	4.2595e-17	-3.30433	condition on vs pre
NR1I2	563.565	TRUE	-8.93403	4.10748e-19	4.9907e-17	-6.59584	condition on vs pre
ITIH4	16089.1	TRUE	-8.89668	5.75424e-19	6.95396e-17	-4.82296	condition on vs pre
TDO2	2218.64	TRUE	-8.89044	6.08701e-19	7.31678e-17	-5.68296	condition on vs pre
PRODH2	894.208	TRUE	-8.88952	6.1373e-19	7.338e-17	-7.62682	condition on vs pre
NPC1L1	456.893	TRUE	-8.88885	6.17469e-19	7.34364e-17	-4.09187	condition on vs pre
NR0B2	255.084	TRUE	-8.86812	7.43924e-19	8.80101e-17	-5.90623	condition on vs pre
TMEM82	246.682	TRUE	-8.8667	7.5345e-19	8.86705e-17	-6.29159	condition on vs pre
LIPG	786.952	TRUE	-8.84418	9.22004e-19	1.07942e-16	-4.00951	condition on vs pre
MBL2	317.294	TRUE	-8.80761	1.27844e-18	1.48895e-16	-7.65226	condition on vs pre
UPB1	1759.31	TRUE	-8.79553	1.42372e-18	1.64961e-16	-4.56939	condition on vs pre
INHBC	763.545	TRUE	-8.76216	1.91542e-18	2.20794e-16	-6.79509	condition on vs pre
CFHR5	629.941	TRUE	-8.73246	2.49196e-18	2.84895e-16	-6.95377	condition on vs pre
SERPINA11	1644.65	TRUE	-8.73224	2.49685e-18	2.84895e-16	-5.49196	condition on vs pre
C8B	4052.58	TRUE	-8.71674	2.86338e-18	3.25066e-16	-7.47389	condition on vs pre
ANGPTL3	1812.76	TRUE	-8.69314	3.52553e-18	3.98225e-16	-6.95294	condition on vs pre
PKLR	336.678	TRUE	-8.68744	3.70695e-18	4.16624e-16	-6.47457	condition on vs pre
CXCL2	342.162	TRUE	-8.68102	3.9222e-18	4.38623e-16	-5.13531	condition on vs pre
CYP2A7	957.644	TRUE	-8.6242	6.45432e-18	7.18218e-16	-7.01411	condition on vs pre
CDO1	1315.01	TRUE	-8.61273	7.13388e-18	7.89928e-16	-4.94585	condition on vs pre
GPD1	1749.11	TRUE	-8.59401	8.39878e-18	9.25431e-16	-4.77491	condition on vs pre
GLT1D1	250.025	TRUE	-8.56614	1.07015e-17	1.1734e-15	-8.33626	condition on vs pre
AC115619.1	268.388	TRUE	-8.5295	1.46979e-17	1.60378e-15	-6.25452	condition on vs pre
KLF15	574.035	TRUE	-8.50897	1.75491e-17	1.90565e-15	-4.77196	condition on vs pre
ACOX2	1296.34	TRUE	-8.48844	2.09434e-17	2.26329e-15	-3.3386	condition on vs pre
SLCO1B1	565.204	TRUE	-8.4852	2.15356e-17	2.31616e-15	-7.59137	condition on vs pre
F5	2264.37	TRUE	-8.48445	2.1674e-17	2.31994e-15	-7.30791	condition on vs pre
HAL	633.918	TRUE	-8.46339	2.59705e-17	2.76666e-15	-5.58923	condition on vs pre
SMLR1	336.294	TRUE	-8.44596	3.01554e-17	3.19733e-15	-7.17635	condition on vs pre
KHK	2442.88	TRUE	-8.4353	3.30359e-17	3.4863e-15	-4.27254	condition on vs pre
CYP4F3	2705.99	TRUE	-8.42925	3.4788e-17	3.65404e-15	-6.11916	condition on vs pre
CFB	34174.4	TRUE	-8.40838	4.15707e-17	4.34617e-15	-4.18593	condition on vs pre
ANXA10	409.45	TRUE	-8.38887	4.90826e-17	5.10777e-15	-7.54163	condition on vs pre
AC137056.2	265.584	TRUE	-8.37987	5.29873e-17	5.4887e-15	-9.26354	condition on vs pre
MTTP	732.585	TRUE	-8.36791	5.86482e-17	6.04722e-15	-7.61818	condition on vs pre
MT1G	2232.06	TRUE	-8.33196	7.95166e-17	8.16153e-15	-4.67758	condition on vs pre
C8G	1136.64	TRUE	-8.23431	1.806e-16	1.84523e-14	-4.52317	condition on vs pre
PZP	800.577	TRUE	-8.21122	2.1896e-16	2.22705e-14	-5.80256	condition on vs pre
PLGLB2	1426.87	TRUE	-8.18551	2.71158e-16	2.74553e-14	-4.207	condition on vs pre
NAT8	271.259	TRUE	-8.17935	2.85368e-16	2.87646e-14	-6.20902	condition on vs pre
RTP3	227.683	TRUE	-8.17871	2.86898e-16	2.87897e-14	-7.46067	condition on vs pre
AC087482.1	207.785	TRUE	-8.16679	3.16704e-16	3.16394e-14	-5.74716	condition on vs pre
ATP2B2	801.769	TRUE	-8.16206	3.29348e-16	3.2757e-14	-6.03419	condition on vs pre
DAO	299.425	TRUE	-8.14238	3.87575e-16	3.83784e-14	-8.21119	condition on vs pre
UGT2B10	1494.62	TRUE	-8.10006	5.49311e-16	5.41553e-14	-7.69066	condition on vs pre
AKR1D1	587.293	TRUE	-8.08746	6.092e-16	5.97973e-14	-4.52633	condition on vs pre
PLA2G12B	203.331	TRUE	-8.08351	6.29267e-16	6.14985e-14	-8.4766	condition on vs pre
AQP7	1040.48	TRUE	-8.07185	6.92392e-16	6.73749e-14	-4.50683	condition on vs pre
GYS2	560.652	TRUE	-8.03776	9.1494e-16	8.86467e-14	-9.12996	condition on vs pre
ACSM5	1086.97	TRUE	-8.02242	1.03685e-15	1.00027e-13	-3.8265	condition on vs pre
MLIP	265.361	TRUE	-8.00393	1.20506e-15	1.15758e-13	-4.68534	condition on vs pre
AKR1C2	3301.53	TRUE	-7.99478	1.2981e-15	1.24165e-13	-4.30005	condition on vs pre
CCL19	633.482	TRUE	-7.96833	1.60835e-15	1.53189e-13	-6.34575	condition on vs pre
AMN	1459.55	TRUE	-7.95472	1.79533e-15	1.70276e-13	-5.79624	condition on vs pre
APOC1	29029.2	TRUE	-7.94042	2.01493e-15	1.90301e-13	-3.9327	condition on vs pre
SARDH	698.174	TRUE	-7.93981	2.02491e-15	1.90444e-13	-3.54162	condition on vs pre
OTC	692.939	TRUE	-7.92523	2.27728e-15	2.13287e-13	-7.44043	condition on vs pre
IGFBP1	1367.64	TRUE	-7.89916	2.80788e-15	2.61891e-13	-7.69145	condition on vs pre
SLC27A5	7705.08	TRUE	-7.88983	3.02589e-15	2.81057e-13	-4.31221	condition on vs pre
VNN1	1273.07	TRUE	-7.874	3.43467e-15	3.17714e-13	-5.29514	condition on vs pre
LINC01018	455.197	TRUE	-7.85898	3.87263e-15	3.56758e-13	-4.89973	condition on vs pre
F11	608.547	TRUE	-7.76273	8.3118e-15	7.62583e-13	-6.99888	condition on vs pre
SLC19A3	841.244	TRUE	-7.74112	9.85486e-15	9.00478e-13	-4.05613	condition on vs pre
TNFSF14	728.024	TRUE	-7.73031	1.07285e-14	9.76339e-13	-3.69181	condition on vs pre
MAOB	1930.55	TRUE	-7.71814	1.18036e-14	1.06984e-12	-3.82491	condition on vs pre
VTN	29479.2	TRUE	-7.60298	2.89395e-14	2.61246e-12	-6.74151	condition on vs pre
ALDH1A1	6647.98	TRUE	-7.56735	3.80926e-14	3.42498e-12	-3.96437	condition on vs pre
CPN1	220.553	TRUE	-7.54829	4.41013e-14	3.94944e-12	-7.20095	condition on vs pre
LECT2	766.444	TRUE	-7.53815	4.76675e-14	4.25186e-12	-5.59623	condition on vs pre
AC008760.2	209.431	TRUE	-7.49779	6.49022e-14	5.76629e-12	-5.13611	condition on vs pre
CP	9111.67	TRUE	-7.49301	6.73111e-14	5.95677e-12	-5.36705	condition on vs pre
SRD5A2	286.775	TRUE	-7.48958	6.90932e-14	6.0905e-12	-5.65604	condition on vs pre
AKR1C1	2781.37	TRUE	-7.47313	7.8308e-14	6.87581e-12	-3.58606	condition on vs pre
CCL15-CCL14	311.601	TRUE	-7.43629	1.03555e-13	9.05724e-12	-4.2551	condition on vs pre
TRARG1	472.704	TRUE	-7.42921	1.09245e-13	9.51782e-12	-6.47422	condition on vs pre
TRABD2B	371.511	TRUE	-7.40801	1.28204e-13	1.11265e-11	-3.74624	condition on vs pre
ESM1	960.036	TRUE	7.40243	1.33712e-13	1.15599e-11	4.01151	condition on vs pre
ACADL	346.415	TRUE	-7.34769	2.01669e-13	1.73683e-11	-3.90251	condition on vs pre
NGFR	591.346	TRUE	-7.29894	2.90052e-13	2.48847e-11	-3.17328	condition on vs pre
MT1H	188.31	TRUE	-7.28427	3.23408e-13	2.76409e-11	-7.05426	condition on vs pre
SLC17A2	216.712	TRUE	-7.28085	3.31721e-13	2.8244e-11	-8.51893	condition on vs pre
MT1B	124.661	TRUE	-7.27048	3.58211e-13	3.03844e-11	-6.56974	condition on vs pre
NAT2	191.428	TRUE	-7.24651	4.27644e-13	3.61375e-11	-4.5904	condition on vs pre
DNASE1L3	682.773	TRUE	-7.23738	4.57438e-13	3.85104e-11	-5.14949	condition on vs pre
SLC38A3	1421.04	TRUE	-7.2256	4.98901e-13	4.18444e-11	-4.36722	condition on vs pre
ASPDH	552.849	TRUE	-7.19291	6.34261e-13	5.29997e-11	-4.98431	condition on vs pre
MASP2	1721.86	TRUE	-7.17026	7.48532e-13	6.23167e-11	-4.48353	condition on vs pre
SLC22A25	117.919	TRUE	-7.15757	8.21205e-13	6.81146e-11	-5.86327	condition on vs pre
OR2I1P	1254.96	TRUE	-7.13309	9.81436e-13	8.11055e-11	-4.28497	condition on vs pre
CNTFR	261.795	TRUE	-7.12862	1.01381e-12	8.34741e-11	-4.7028	condition on vs pre
SLC30A10	150.416	TRUE	-7.12136	1.06869e-12	8.76715e-11	-5.7962	condition on vs pre
TM4SF4	2989.58	TRUE	-7.10205	1.22916e-12	1.00469e-10	-6.83097	condition on vs pre
MT1M	254.645	TRUE	-7.0819	1.42191e-12	1.15804e-10	-4.27748	condition on vs pre
CYP2C18	273.048	TRUE	-7.06612	1.59324e-12	1.29288e-10	-6.29368	condition on vs pre
ACSL1	7151.09	TRUE	-7.06463	1.6105e-12	1.30219e-10	-2.86383	condition on vs pre
HSD17B2	1391.53	TRUE	-7.05951	1.67086e-12	1.34615e-10	-4.43409	condition on vs pre
LRG1	5127.19	TRUE	-7.03928	1.93241e-12	1.55131e-10	-3.92202	condition on vs pre
C14orf180	228.482	TRUE	-7.03419	2.00425e-12	1.60325e-10	-7.60821	condition on vs pre
ASPG	781.099	TRUE	-7.02867	2.08515e-12	1.66206e-10	-5.12003	condition on vs pre
CHST9	232.912	TRUE	-7.02161	2.19321e-12	1.74201e-10	-5.55955	condition on vs pre
AKR1C3	1991.72	TRUE	-7.00922	2.39651e-12	1.89679e-10	-2.93247	condition on vs pre
ASS1	9817.41	TRUE	-7.00712	2.43281e-12	1.91876e-10	-4.81983	condition on vs pre
SULT1E1	152.973	TRUE	-6.99309	2.68893e-12	2.11335e-10	-6.42277	condition on vs pre
PIGR	2038.4	TRUE	-6.98205	2.90896e-12	2.27831e-10	-4.78769	condition on vs pre
CLEC4G	211.14	TRUE	-6.92352	4.40568e-12	3.43857e-10	-6.7806	condition on vs pre
TMPRSS6	1499.6	TRUE	-6.90175	5.13671e-12	3.99526e-10	-5.77457	condition on vs pre
TMEM37	994.786	TRUE	-6.89036	5.56511e-12	4.31354e-10	-2.62866	condition on vs pre
CCL21	450.317	TRUE	-6.88769	5.67064e-12	4.38023e-10	-5.7245	condition on vs pre
CDHR5	1327.23	TRUE	-6.87496	6.20084e-12	4.77337e-10	-5.13836	condition on vs pre
APOF	1176.18	TRUE	-6.87234	6.31581e-12	4.84528e-10	-4.97965	condition on vs pre
APOE	77072.6	TRUE	-6.86194	6.79314e-12	5.19375e-10	-2.62753	condition on vs pre
RBP4	33518.3	TRUE	-6.84664	7.56062e-12	5.76093e-10	-6.21841	condition on vs pre
CPB2	2443.46	TRUE	-6.82387	8.86199e-12	6.72973e-10	-6.69139	condition on vs pre
TRIM55	135.808	TRUE	-6.82221	8.96513e-12	6.78513e-10	-7.15594	condition on vs pre
ATOH8	349.572	TRUE	-6.82103	9.0393e-12	6.8183e-10	-4.02998	condition on vs pre
ZNF511-PRAP1	332.508	TRUE	-6.8049	1.01117e-11	7.60171e-10	-6.6874	condition on vs pre
CYP1A2	1611.07	TRUE	-6.80408	1.01694e-11	7.61957e-10	-3.93016	condition on vs pre
SLC17A4	408.968	TRUE	-6.78446	1.16522e-11	8.70159e-10	-6.53713	condition on vs pre
CFH	9862.87	TRUE	-6.78343	1.1736e-11	8.73512e-10	-3.85029	condition on vs pre
PGLYRP2	1299.47	TRUE	-6.77104	1.27856e-11	9.48495e-10	-5.37561	condition on vs pre
LINC01127	156.741	TRUE	-6.76966	1.29084e-11	9.54459e-10	-5.62732	condition on vs pre
C2	5327.96	TRUE	-6.76804	1.30538e-11	9.62045e-10	-3.35307	condition on vs pre
MT1X	2131.88	TRUE	-6.76047	1.37545e-11	1.01037e-09	-2.69	condition on vs pre
MAOA	1902.61	TRUE	-6.74609	1.51878e-11	1.10842e-09	-3.3016	condition on vs pre
PCOLCE2	275.961	TRUE	-6.7462	1.51771e-11	1.10842e-09	-5.23875	condition on vs pre
SLC22A10	152.65	TRUE	-6.73135	1.68097e-11	1.22281e-09	-5.83592	condition on vs pre
CYP4F2	1045.91	TRUE	-6.71573	1.87127e-11	1.35685e-09	-5.31598	condition on vs pre
AC008549.1	128.701	TRUE	-6.71036	1.94146e-11	1.40322e-09	-5.15007	condition on vs pre
FAM99B	128.783	TRUE	-6.70636	1.99536e-11	1.43756e-09	-9.96396	condition on vs pre
ABCA8	1182.54	TRUE	-6.70286	2.04375e-11	1.46771e-09	-3.79313	condition on vs pre
DEPP1	3506.93	TRUE	-6.649	2.95098e-11	2.11248e-09	-2.35823	condition on vs pre
CHRNA4	509.572	TRUE	-6.64076	3.12062e-11	2.22684e-09	-6.04409	condition on vs pre
CYP1A1	120.631	TRUE	-6.6393	3.15179e-11	2.24196e-09	-7.28366	condition on vs pre
CXCL9	1486.76	TRUE	-6.62829	3.39603e-11	2.40807e-09	-3.04246	condition on vs pre
GRB14	1584.13	TRUE	-6.61518	3.71111e-11	2.62322e-09	-4.77915	condition on vs pre
ABCB4	1516.09	TRUE	-6.58188	4.6454e-11	3.27333e-09	-4.99108	condition on vs pre
AC009879.3	408.455	TRUE	-6.57233	4.95333e-11	3.47941e-09	-6.44065	condition on vs pre
IDO2	317.196	TRUE	-6.55863	5.43027e-11	3.80254e-09	-3.74692	condition on vs pre
NR1H4	242.192	TRUE	-6.55661	5.5045e-11	3.84255e-09	-6.74732	condition on vs pre
CLDN2	385.44	TRUE	-6.55055	5.73252e-11	3.98934e-09	-4.76152	condition on vs pre
ADI1	5617.66	TRUE	-6.54476	5.95893e-11	4.1341e-09	-2.4617	condition on vs pre
TMOD1	430.967	TRUE	-6.50923	7.55345e-11	5.2242e-09	-4.33029	condition on vs pre
SRPX	809.106	TRUE	-6.48715	8.74744e-11	6.03144e-09	-3.05461	condition on vs pre
GLTPD2	858.663	TRUE	-6.47242	9.64472e-11	6.62979e-09	-3.74285	condition on vs pre
THRSP	636.408	TRUE	-6.45421	1.08786e-10	7.45517e-09	-4.27907	condition on vs pre
CBS	2351.59	TRUE	-6.45294	1.09703e-10	7.49513e-09	-3.54895	condition on vs pre
ANG	3618.27	TRUE	-6.45028	1.11644e-10	7.60465e-09	-4.38521	condition on vs pre
FOLH1B	106.544	TRUE	-6.44515	1.15487e-10	7.84262e-09	-5.52532	condition on vs pre
FOXA2	175.211	TRUE	-6.42318	1.33454e-10	9.02624e-09	-8.10617	condition on vs pre
RF02101	142.183	TRUE	-6.42288	1.33719e-10	9.02624e-09	-7.65608	condition on vs pre
LINC01595	338.408	TRUE	-6.41338	1.42324e-10	9.57835e-09	-6.65296	condition on vs pre
PROZ	743.941	TRUE	-6.4091	1.46386e-10	9.82227e-09	-4.94019	condition on vs pre
AC006064.6	157.625	TRUE	-6.40249	1.52866e-10	1.02266e-08	-9.47418	condition on vs pre
OXER1	420.713	TRUE	-6.39212	1.63605e-10	1.09125e-08	-3.16503	condition on vs pre
RIDA	2784.36	TRUE	-6.38512	1.71268e-10	1.13898e-08	-2.83291	condition on vs pre
PHYH	2278.06	TRUE	-6.37501	1.82953e-10	1.2131e-08	-2.49937	condition on vs pre
PPP2R1B	3497.19	TRUE	-6.36934	1.8984e-10	1.25506e-08	-2.91695	condition on vs pre
ALPK2	340.691	TRUE	-6.35043	2.14718e-10	1.41538e-08	-4.45321	condition on vs pre
DBH	250.523	TRUE	-6.33813	2.32574e-10	1.5286e-08	-3.77043	condition on vs pre
PIPOX	2020.51	TRUE	-6.33614	2.35593e-10	1.54392e-08	-4.43276	condition on vs pre
IGLV3-9	302.697	TRUE	-6.33474	2.37747e-10	1.55351e-08	-4.27967	condition on vs pre
GATA4	154.81	TRUE	-6.31857	2.64002e-10	1.72007e-08	-5.93304	condition on vs pre
GAMT	3906.62	TRUE	-6.29191	3.13586e-10	2.03722e-08	-2.39379	condition on vs pre
MPPED1	134.274	TRUE	-6.2349	4.52066e-10	2.9284e-08	-4.69184	condition on vs pre
NECAB2	317.629	TRUE	-6.22446	4.83215e-10	3.12118e-08	-4.21794	condition on vs pre
DGAT2	1964.13	TRUE	-6.21795	5.03701e-10	3.24418e-08	-4.33998	condition on vs pre
F12	4786.9	TRUE	-6.20941	5.31836e-10	3.4156e-08	-3.98262	condition on vs pre
ABCG8	793.869	TRUE	-6.17838	6.47628e-10	4.1474e-08	-3.52882	condition on vs pre
LGALS4	1118.63	TRUE	-6.17271	6.71292e-10	4.28673e-08	-3.876	condition on vs pre
XPNPEP2	323.986	TRUE	-6.15608	7.45658e-10	4.74813e-08	-5.10809	condition on vs pre
C1R	25862.1	TRUE	-6.15103	7.69795e-10	4.88798e-08	-3.23326	condition on vs pre
CRP	12215	TRUE	-6.14272	8.11223e-10	5.13653e-08	-6.38879	condition on vs pre
ABCC2	1192.2	TRUE	-6.13502	8.51488e-10	5.37634e-08	-3.55255	condition on vs pre
F11-AS1	108.478	TRUE	-6.12888	8.85012e-10	5.57235e-08	-9.09897	condition on vs pre
TMEM100	150.457	TRUE	-6.11713	9.52741e-10	5.98204e-08	-5.33094	condition on vs pre
PDK4	2282.91	TRUE	-6.1085	1.00572e-09	6.29706e-08	-4.27618	condition on vs pre
SEC16B	515.281	TRUE	-6.10138	1.05157e-09	6.56592e-08	-2.93731	condition on vs pre
IGLV1-51	1388.13	TRUE	-6.10086	1.05496e-09	6.56881e-08	-5.42503	condition on vs pre
CLYBL	516.313	TRUE	-6.09748	1.07752e-09	6.68227e-08	-2.82179	condition on vs pre
LIPC	601.868	TRUE	-6.09724	1.07913e-09	6.68227e-08	-3.38056	condition on vs pre
PDZK1	878.03	TRUE	-6.09554	1.09066e-09	6.73515e-08	-2.80738	condition on vs pre
MST1L	1517.38	TRUE	-6.08813	1.1424e-09	7.03531e-08	-2.50256	condition on vs pre
SLC27A2	1083.18	TRUE	-6.08248	1.18334e-09	7.26752e-08	-2.95152	condition on vs pre
ATF5	4826.36	TRUE	-6.06332	1.33338e-09	8.1667e-08	-2.64193	condition on vs pre
IGLV1-40	2309.82	TRUE	-6.05059	1.4432e-09	8.81531e-08	-3.26532	condition on vs pre
GATM	6351.74	TRUE	-6.02681	1.67225e-09	1.01867e-07	-3.04911	condition on vs pre
RNASE4	1878.48	TRUE	-6.00138	1.95643e-09	1.18855e-07	-2.96348	condition on vs pre
DEFB1	208.804	TRUE	-5.98927	2.10791e-09	1.27713e-07	-5.36941	condition on vs pre
CD36	4340.61	TRUE	-5.98523	2.16089e-09	1.30571e-07	-3.19799	condition on vs pre
HMGCS2	10324.5	TRUE	-5.98292	2.19179e-09	1.32083e-07	-5.80869	condition on vs pre
CRYAA2	106.534	TRUE	-5.96949	2.37991e-09	1.43036e-07	-5.25233	condition on vs pre
RARRES2	10298.1	TRUE	-5.95339	2.62637e-09	1.57428e-07	-2.81565	condition on vs pre
FUOM	797.698	TRUE	-5.94036	2.84405e-09	1.70023e-07	-3.42815	condition on vs pre
C7	3850.37	TRUE	-5.92949	3.03875e-09	1.8118e-07	-4.93654	condition on vs pre
SHMT1	2529.37	TRUE	-5.92152	3.18972e-09	1.89679e-07	-2.21296	condition on vs pre
FABP4	3608.14	TRUE	-5.91925	3.23408e-09	1.91809e-07	-5.0988	condition on vs pre
HAMP	1545.91	TRUE	-5.91731	3.27247e-09	1.93575e-07	-4.78269	condition on vs pre
LINC02499	125.247	TRUE	-5.89653	3.7122e-09	2.1901e-07	-7.16286	condition on vs pre
AL049839.2	2073.01	TRUE	-5.8839	4.00716e-09	2.35177e-07	-5.77757	condition on vs pre
FCN2	151.377	TRUE	-5.88407	4.00305e-09	2.35177e-07	-5.5843	condition on vs pre
SELP	150.928	TRUE	-5.87695	4.17886e-09	2.44616e-07	-4.95326	condition on vs pre
AC073957.2	72.5497	TRUE	-5.87251	4.29243e-09	2.50611e-07	-9.65299	condition on vs pre
PROX1	429.969	TRUE	-5.8537	4.8076e-09	2.79962e-07	-4.16891	condition on vs pre
LEAP2	567.592	TRUE	-5.84855	4.95879e-09	2.8802e-07	-2.99139	condition on vs pre
AC021074.3	92.5985	TRUE	-5.84068	5.19871e-09	3.01177e-07	-5.39252	condition on vs pre
FMO5	1881.95	TRUE	-5.83759	5.29609e-09	3.05245e-07	-2.50384	condition on vs pre
IGKV1D-39	1749.96	TRUE	-5.83784	5.28819e-09	3.05245e-07	-2.40935	condition on vs pre
PFKFB1	337.323	TRUE	-5.81968	5.89616e-09	3.38961e-07	-3.13621	condition on vs pre
GPT	1364.14	TRUE	-5.80976	6.25617e-09	3.5874e-07	-2.63126	condition on vs pre
APOA4	435.183	TRUE	-5.80758	6.33811e-09	3.62514e-07	-6.12103	condition on vs pre
IFIT1	1637.22	TRUE	-5.7995	6.65141e-09	3.79468e-07	-2.16716	condition on vs pre
HYAL1	730.84	TRUE	-5.79566	6.80547e-09	3.87274e-07	-3.37135	condition on vs pre
SERPINA3	36361.1	TRUE	-5.78276	7.3484e-09	4.17114e-07	-5.34188	condition on vs pre
AC068631.1	1266.64	TRUE	-5.77524	7.68444e-09	4.3509e-07	-3.93466	condition on vs pre
ANPEP	4153.76	TRUE	-5.76825	8.01006e-09	4.52387e-07	-3.0191	condition on vs pre
CHIT1	409.209	TRUE	-5.75365	8.73357e-09	4.92013e-07	-3.83605	condition on vs pre
SLC17A3	91.2232	TRUE	-5.75109	8.86721e-09	4.98293e-07	-7.93713	condition on vs pre
HBB	28398	TRUE	-5.73094	9.98746e-09	5.59846e-07	-5.60237	condition on vs pre
CES3	566.573	TRUE	-5.72585	1.02917e-08	5.75467e-07	-3.28376	condition on vs pre
SERPING1	24532.2	TRUE	-5.69038	1.26759e-08	7.0702e-07	-3.33311	condition on vs pre
ADGRG7	115.15	TRUE	-5.67509	1.38619e-08	7.71259e-07	-6.66282	condition on vs pre
GBA3	219.099	TRUE	-5.66771	1.44722e-08	8.03223e-07	-6.40263	condition on vs pre
SDS	2673.34	TRUE	-5.66485	1.47149e-08	8.14685e-07	-2.82679	condition on vs pre
OSGIN1	1450.78	TRUE	-5.6532	1.5749e-08	8.69791e-07	-3.00037	condition on vs pre
CYP4F12	672.486	TRUE	-5.64907	1.61316e-08	8.88741e-07	-3.64272	condition on vs pre
AL121845.2	218.994	TRUE	-5.64784	1.62473e-08	8.92928e-07	-9.22063	condition on vs pre
MST1	6596.17	TRUE	-5.64366	1.66474e-08	9.12683e-07	-2.3408	condition on vs pre
ZNF385B	188.059	TRUE	-5.64259	1.67507e-08	9.1611e-07	-4.35011	condition on vs pre
ABCA6	1009.79	TRUE	-5.62075	1.90132e-08	1.03733e-06	-2.85107	condition on vs pre
C1S	28813.4	TRUE	-5.60207	2.11803e-08	1.15276e-06	-3.336	condition on vs pre
CYP27A1	6954.15	TRUE	-5.59047	2.26454e-08	1.22953e-06	-2.95888	condition on vs pre
C5	2260	TRUE	-5.584	2.3505e-08	1.27312e-06	-2.67262	condition on vs pre
PON3	1233.08	TRUE	-5.58137	2.38634e-08	1.28942e-06	-4.62488	condition on vs pre
EHHADH	1841.03	TRUE	-5.57818	2.4305e-08	1.31014e-06	-2.22699	condition on vs pre
DMGDH	416.429	TRUE	-5.57476	2.47874e-08	1.33295e-06	-2.72832	condition on vs pre
MT1F	805.323	TRUE	-5.55208	2.82283e-08	1.51436e-06	-2.60579	condition on vs pre
GLS2	610.339	TRUE	-5.53694	3.0781e-08	1.64737e-06	-3.68688	condition on vs pre
LTB	774.838	TRUE	-5.52151	3.36103e-08	1.79452e-06	-3.04216	condition on vs pre
AADACP1	91.6031	TRUE	-5.50625	3.66549e-08	1.95244e-06	-6.14141	condition on vs pre
IGSF23	125.52	TRUE	-5.47604	4.34948e-08	2.31129e-06	-6.62157	condition on vs pre
AC138866.1	61.24	TRUE	5.47293	4.42661e-08	2.34673e-06	9.30982	condition on vs pre
TRHDE-AS1	206.515	TRUE	-5.46466	4.63791e-08	2.45297e-06	-4.48616	condition on vs pre
HAAO	1345.45	TRUE	-5.45068	5.01786e-08	2.64768e-06	-3.44648	condition on vs pre
CD3E	484.262	TRUE	-5.44047	5.3139e-08	2.79733e-06	-2.57212	condition on vs pre
LPAL2	141.668	TRUE	-5.42186	5.89808e-08	3.09759e-06	-3.97047	condition on vs pre
FOXA3	360.124	TRUE	-5.41766	6.03826e-08	3.16382e-06	-4.12191	condition on vs pre
SPP2	726.737	TRUE	-5.40631	6.43377e-08	3.36321e-06	-3.56285	condition on vs pre
IGHM	11405.3	TRUE	-5.4029	6.55737e-08	3.41987e-06	-3.7116	condition on vs pre
IL1RAP	500.491	TRUE	-5.35881	8.37712e-08	4.34875e-06	-2.31469	condition on vs pre
LEPR	1115.23	TRUE	-5.359	8.36852e-08	4.34875e-06	-2.80773	condition on vs pre
CTSS	3191.72	TRUE	-5.34161	9.21229e-08	4.77129e-06	-1.8048	condition on vs pre
COLEC10	208.518	TRUE	-5.33603	9.50046e-08	4.90923e-06	-3.73973	condition on vs pre
APOC1P1	934.286	TRUE	-5.33539	9.53401e-08	4.91526e-06	-3.8678	condition on vs pre
TMEM176A	4003.51	TRUE	-5.33009	9.8162e-08	5.04917e-06	-3.59153	condition on vs pre
RDH12	67.4807	TRUE	-5.31991	1.03817e-07	5.32784e-06	-7.58674	condition on vs pre
IGKV1-39	1402.54	TRUE	-5.27663	1.31584e-07	6.73412e-06	-2.36049	condition on vs pre
LINC01702	85.259	TRUE	-5.2763	1.31818e-07	6.73412e-06	-5.07542	condition on vs pre
HGD	2145.92	TRUE	-5.26865	1.37429e-07	7.00484e-06	-4.15719	condition on vs pre
METTL7A	4646.75	TRUE	-5.25643	1.46881e-07	7.46966e-06	-2.03713	condition on vs pre
ANGPTL8	227.43	TRUE	-5.24274	1.58211e-07	8.022e-06	-4.23489	condition on vs pre
CD5L	78.9098	TRUE	-5.24245	1.58456e-07	8.022e-06	-8.44855	condition on vs pre
CFP	487.8	TRUE	-5.23686	1.63333e-07	8.25033e-06	-3.35791	condition on vs pre
AC104461.1	116.525	TRUE	-5.2108	1.88024e-07	9.47622e-06	-3.85171	condition on vs pre
TRPM8	277.582	TRUE	-5.20723	1.91684e-07	9.63909e-06	-3.83896	condition on vs pre
EPDR1	359.028	TRUE	-5.19371	2.06149e-07	1.03433e-05	-2.73681	condition on vs pre
GPAM	2595.93	TRUE	-5.18102	2.20673e-07	1.10474e-05	-2.79697	condition on vs pre
LOXL4	305.18	TRUE	-5.1798	2.22128e-07	1.10956e-05	-2.61971	condition on vs pre
RDH5	571.209	TRUE	-5.16535	2.3999e-07	1.19612e-05	-2.53376	condition on vs pre
SHH	171.823	TRUE	-5.14794	2.63357e-07	1.30679e-05	-3.51109	condition on vs pre
TST	3661.77	TRUE	-5.14818	2.6303e-07	1.30679e-05	-2.85058	condition on vs pre
SLC17A1	85.6879	TRUE	-5.14204	2.71768e-07	1.34555e-05	-6.60971	condition on vs pre
GLYATL1	1689.75	TRUE	-5.13406	2.83561e-07	1.40086e-05	-4.79989	condition on vs pre
AC046185.1	55.4133	TRUE	5.12581	2.96269e-07	1.46042e-05	8.94685	condition on vs pre
AL591485.1	1535.21	TRUE	-5.12173	3.02747e-07	1.48909e-05	-2.74654	condition on vs pre
ABCC6P1	351.848	TRUE	-5.11578	3.12451e-07	1.53346e-05	-5.36938	condition on vs pre
ANGPTL6	180.358	TRUE	-5.11482	3.1404e-07	1.53791e-05	-4.84784	condition on vs pre
RNU1-70P	69.9816	TRUE	-5.07609	3.85272e-07	1.88264e-05	-7.29598	condition on vs pre
FNDC5	474.921	TRUE	-5.07335	3.90867e-07	1.90584e-05	-3.54146	condition on vs pre
MUC3A	739.842	TRUE	-5.0699	3.98035e-07	1.93658e-05	-4.42882	condition on vs pre
CLDN14	237.826	TRUE	-5.06768	4.02689e-07	1.955e-05	-3.75441	condition on vs pre
ABCB1	517.517	TRUE	-5.0632	4.12272e-07	1.99721e-05	-3.31126	condition on vs pre
MST1P2	2041.74	TRUE	-5.05229	4.36535e-07	2.1102e-05	-2.59117	condition on vs pre
PTGR1	2955.32	TRUE	-5.02957	4.91569e-07	2.37114e-05	-1.87223	condition on vs pre
PGM1	2509.63	TRUE	-5.02631	5.00013e-07	2.4067e-05	-1.92008	condition on vs pre
ALDH2	17180.1	TRUE	-5.02127	5.13323e-07	2.46548e-05	-2.6822	condition on vs pre
LINC01370	65.7023	TRUE	-5.01091	5.4172e-07	2.59633e-05	-7.90031	condition on vs pre
BPIFB1	2808.89	TRUE	-5.00691	5.53112e-07	2.64529e-05	-4.05979	condition on vs pre
APOL1	4643.62	TRUE	-4.99966	5.74304e-07	2.735e-05	-1.97731	condition on vs pre
SMIM24	506.481	TRUE	-4.99969	5.74226e-07	2.735e-05	-6.59565	condition on vs pre
CNGA1	168.059	TRUE	-4.99899	5.76322e-07	2.73881e-05	-3.79548	condition on vs pre
LINC01554	376.186	TRUE	-4.99436	5.90306e-07	2.79934e-05	-2.85961	condition on vs pre
AC022613.1	144.17	TRUE	-4.98716	6.12737e-07	2.8996e-05	-5.47263	condition on vs pre
IL1RN	207.523	TRUE	-4.98493	6.19848e-07	2.92709e-05	-3.3319	condition on vs pre
ACSM3	472.345	TRUE	-4.97235	6.61455e-07	3.11702e-05	-2.72037	condition on vs pre
LINC01485	220.063	TRUE	-4.96955	6.71088e-07	3.1558e-05	-3.26698	condition on vs pre
AP001065.1	65.6742	TRUE	-4.95275	7.31727e-07	3.42662e-05	-4.87922	condition on vs pre
CD163	1564.42	TRUE	-4.95314	7.30257e-07	3.42662e-05	-2.27023	condition on vs pre
TPSAB1	1607.84	TRUE	4.9447	7.62599e-07	3.56376e-05	2.83333	condition on vs pre
AC241584.2	48.7413	TRUE	-4.90364	9.40786e-07	4.38734e-05	-7.38088	condition on vs pre
CFHR4	160.025	TRUE	-4.90107	9.5314e-07	4.43575e-05	-4.89005	condition on vs pre
EXOC3L4	819.438	TRUE	-4.89563	9.79918e-07	4.55095e-05	-4.09943	condition on vs pre
CLEC4M	376.309	TRUE	-4.89242	9.96029e-07	4.61624e-05	-3.95523	condition on vs pre
FAM163B	63.431	TRUE	-4.88925	1.01223e-06	4.68165e-05	-6.45738	condition on vs pre
LINC02532	240.065	TRUE	-4.88676	1.02508e-06	4.73138e-05	-3.80497	condition on vs pre
SERPINF1	7923.1	TRUE	-4.8791	1.06571e-06	4.90883e-05	-2.41004	condition on vs pre
CA5A	899.945	TRUE	-4.86409	1.14982e-06	5.2854e-05	-3.05684	condition on vs pre
AC114291.1	133.954	TRUE	-4.85836	1.1836e-06	5.42957e-05	-4.00876	condition on vs pre
PALMD	1034.58	TRUE	-4.85412	1.20923e-06	5.53586e-05	-2.42036	condition on vs pre
IGHV3-48	886.599	TRUE	-4.84856	1.24361e-06	5.68169e-05	-3.52143	condition on vs pre
SLC22A9	162.877	TRUE	-4.84322	1.27752e-06	5.82477e-05	-4.43709	condition on vs pre
PTGDS	1386.22	TRUE	-4.8418	1.28671e-06	5.85477e-05	-3.63683	condition on vs pre
GPC6	612.695	TRUE	-4.83985	1.29938e-06	5.90052e-05	-2.67309	condition on vs pre
LINC01146	169.265	TRUE	-4.83917	1.30386e-06	5.90888e-05	-5.28316	condition on vs pre
LINC01093	125.47	TRUE	-4.83382	1.33936e-06	6.05756e-05	-5.69047	condition on vs pre
B2M	63506.6	TRUE	-4.82865	1.37461e-06	6.20452e-05	-1.58406	condition on vs pre
PLGLB1	780.523	TRUE	-4.82549	1.39661e-06	6.2912e-05	-2.40957	condition on vs pre
LINC00844	56.2113	TRUE	-4.81643	1.46151e-06	6.57035e-05	-6.54074	condition on vs pre
CYP4F11	686.767	TRUE	-4.80569	1.54221e-06	6.91931e-05	-3.59155	condition on vs pre
JCHAIN	4301.88	TRUE	-4.79841	1.59929e-06	7.16114e-05	-3.09889	condition on vs pre
PDE3B	573.414	TRUE	-4.79717	1.60923e-06	7.1913e-05	-2.52621	condition on vs pre
PLA1A	128.952	TRUE	-4.79201	1.65122e-06	7.3643e-05	-3.21837	condition on vs pre
DSG1	59.5143	TRUE	-4.78096	1.74463e-06	7.76549e-05	-7.28336	condition on vs pre
C1QA	4697.02	TRUE	-4.77761	1.77387e-06	7.88004e-05	-1.64637	condition on vs pre
MARCO	213.493	TRUE	-4.77368	1.80891e-06	8.01987e-05	-5.35256	condition on vs pre
CD14	4727.38	TRUE	-4.77245	1.82e-06	8.05314e-05	-2.38816	condition on vs pre
HSD17B11	1361.51	TRUE	-4.77004	1.84194e-06	8.13419e-05	-2.43001	condition on vs pre
CRYZL2P-SEC16B	407.772	TRUE	-4.76961	1.84582e-06	8.13537e-05	-2.48911	condition on vs pre
MT2A	9007.91	TRUE	-4.75889	1.94659e-06	8.56271e-05	-2.2228	condition on vs pre
AARD	1202.34	TRUE	4.74443	2.09095e-06	9.17975e-05	1.90441	condition on vs pre
CNKSR3	1182.9	TRUE	-4.74141	2.12234e-06	9.29941e-05	-2.33114	condition on vs pre
NNMT	4887.01	TRUE	-4.73939	2.1436e-06	9.3743e-05	-2.95914	condition on vs pre
CCL16	562.199	TRUE	-4.72376	2.31529e-06	0.000101055	-3.0285	condition on vs pre
AC244100.2	792.231	TRUE	-4.72214	2.33372e-06	0.000101662	-10.2736	condition on vs pre
GBP5	546.651	TRUE	-4.71582	2.40736e-06	0.000104666	-2.29875	condition on vs pre
C1QB	4161.04	TRUE	-4.71371	2.43249e-06	0.000105555	-1.70172	condition on vs pre
TMEM220	478.97	TRUE	-4.71137	2.46052e-06	0.000106566	-3.2863	condition on vs pre
MYO7A	592.472	TRUE	-4.71062	2.46966e-06	0.000106756	-2.47081	condition on vs pre
IL33	211.671	TRUE	-4.70206	2.57548e-06	0.000111116	-2.97519	condition on vs pre
RBP5	1453.93	TRUE	-4.69965	2.60608e-06	0.000112221	-2.89463	condition on vs pre
IGLC3	12238.6	TRUE	-4.69799	2.62729e-06	0.000112918	-2.79318	condition on vs pre
TMPRSS3	691.917	TRUE	-4.69177	2.70846e-06	0.000116185	-1.97244	condition on vs pre
NOTUM	251.723	TRUE	-4.6824	2.83533e-06	0.000121395	-2.61184	condition on vs pre
MYOM1	1137.8	TRUE	-4.67907	2.88177e-06	0.000123149	-3.24152	condition on vs pre
GDA	366.664	TRUE	-4.66861	3.03242e-06	0.000129341	-2.82453	condition on vs pre
GYG2	653.296	TRUE	-4.65531	3.23488e-06	0.000137715	-4.07861	condition on vs pre
IGLC2	19204.1	TRUE	-4.65333	3.26616e-06	0.000138784	-2.80671	condition on vs pre
PTPRC	1099.72	TRUE	-4.64382	3.42021e-06	0.000145056	-1.76946	condition on vs pre
IL32	5166.84	TRUE	-4.6248	3.74955e-06	0.000158724	-2.73289	condition on vs pre
PPARGC1A	168.268	TRUE	-4.62009	3.83573e-06	0.000162067	-3.81888	condition on vs pre
ABCB11	374.546	TRUE	-4.6135	3.95944e-06	0.00016698	-2.63863	condition on vs pre
ACVR1C	192.671	TRUE	-4.60609	4.10311e-06	0.000172715	-4.85806	condition on vs pre
CBR1	2335.11	TRUE	-4.6036	4.15256e-06	0.00017447	-2.02424	condition on vs pre
MRC1	414.555	TRUE	-4.58879	4.45833e-06	0.000186967	-2.71542	condition on vs pre
UGT1A4	1876.07	TRUE	-4.5746	4.77123e-06	0.000199717	-8.48033	condition on vs pre
MPST	4497.99	TRUE	-4.56558	4.98119e-06	0.000208118	-1.82996	condition on vs pre
GLYCTK	2773.79	TRUE	-4.56511	4.99235e-06	0.000208197	-3.38299	condition on vs pre
CIDEC	402.886	TRUE	-4.56191	5.06898e-06	0.000211001	-5.73289	condition on vs pre
IGKV4-1	3237.14	TRUE	-4.54519	5.4886e-06	0.000228046	-3.15589	condition on vs pre
FXYD2	207.499	TRUE	-4.54176	5.57867e-06	0.00023136	-4.66956	condition on vs pre
IGHV3-33	488.196	TRUE	-4.53968	5.63408e-06	0.000233228	-5.4557	condition on vs pre
DNAJC22	864.297	TRUE	-4.53707	5.7042e-06	0.000235697	-1.98924	condition on vs pre
TMEM176B	6219.86	TRUE	-4.53396	5.78882e-06	0.000238754	-3.18841	condition on vs pre
CRYL1	1874.66	TRUE	-4.53336	5.80537e-06	0.000238998	-1.78225	condition on vs pre
TTPA	286.716	TRUE	-4.52815	5.9501e-06	0.000244509	-4.66361	condition on vs pre
IL2RG	529.793	TRUE	-4.5157	6.31075e-06	0.000258856	-2.06032	condition on vs pre
AC111000.4	74.9205	TRUE	-4.51189	6.42525e-06	0.000263073	-6.32639	condition on vs pre
AL163636.2	1623.96	TRUE	-4.50895	6.51488e-06	0.000266257	-1.93064	condition on vs pre
MAPT	1897.88	TRUE	4.50155	6.74611e-06	0.000275207	2.12578	condition on vs pre
EPHX2	1054.59	TRUE	-4.49043	7.1078e-06	0.000289437	-2.05973	condition on vs pre
CPA3	533.977	TRUE	4.48917	7.1502e-06	0.000290637	2.39881	condition on vs pre
GZMK	226.479	TRUE	-4.4846	7.30496e-06	0.000296392	-2.7156	condition on vs pre
UNC93A	51.3558	TRUE	-4.48176	7.40299e-06	0.000299828	-7.13261	condition on vs pre
IGHG4	1836.06	TRUE	-4.48096	7.43074e-06	0.00030041	-2.49312	condition on vs pre
CAPN5	832.609	TRUE	-4.47815	7.52944e-06	0.000303854	-2.42755	condition on vs pre
GPX2	2092.68	TRUE	-4.47452	7.65817e-06	0.000308495	-4.77568	condition on vs pre
IGHG2	15872.1	TRUE	-4.47339	7.69887e-06	0.00030958	-3.02404	condition on vs pre
TFPI	2159.53	TRUE	-4.4678	7.90275e-06	0.000317211	-2.51164	condition on vs pre
FST	809.082	TRUE	-4.46665	7.94557e-06	0.000318361	-3.89411	condition on vs pre
AC120114.2	38.3474	TRUE	4.45965	8.20935e-06	0.000328345	8.5441	condition on vs pre
NKG7	286.367	TRUE	-4.45279	8.47605e-06	0.00033841	-2.76222	condition on vs pre
CPED1	702.861	TRUE	-4.44856	8.64493e-06	0.00034454	-3.08	condition on vs pre
CCDC78	2146.09	TRUE	4.44735	8.69347e-06	0.000345277	1.53817	condition on vs pre
SLC43A1	1159.27	TRUE	-4.44734	8.69413e-06	0.000345277	-2.08549	condition on vs pre
CYP2J2	895.658	TRUE	-4.44691	8.71125e-06	0.000345346	-2.5627	condition on vs pre
HS3ST3B1	378.072	TRUE	-4.43539	9.19076e-06	0.000363715	-2.63377	condition on vs pre
RDH16	2711.37	TRUE	-4.42189	9.78432e-06	0.000386524	-3.60922	condition on vs pre
IGHV3-15	740.582	TRUE	-4.42102	9.82374e-06	0.0003874	-2.69588	condition on vs pre
HNF1A	155.56	TRUE	-4.41696	1.00097e-05	0.000394044	-2.93755	condition on vs pre
IGHV3-21	1303.48	TRUE	-4.41598	1.00551e-05	0.000394448	-2.99552	condition on vs pre
IGKC	49924.1	TRUE	-4.41609	1.005e-05	0.000394448	-2.54501	condition on vs pre
PIK3AP1	704.313	TRUE	-4.41283	1.0203e-05	0.000399552	-1.80714	condition on vs pre
HLF	514.558	TRUE	-4.4123	1.02277e-05	0.000399822	-3.77508	condition on vs pre
TM6SF2	206.177	TRUE	-4.40993	1.03402e-05	0.000403521	-3.13435	condition on vs pre
MT1E	3745.24	TRUE	-4.40905	1.03827e-05	0.000404475	-2.59953	condition on vs pre
ALDH8A1	1344.2	TRUE	-4.40426	1.06145e-05	0.00041279	-2.92181	condition on vs pre
SELENOP	21770.4	TRUE	-4.4023	1.0711e-05	0.000415825	-1.40954	condition on vs pre
DECR1	3517.1	TRUE	-4.39135	1.12649e-05	0.000436572	-1.60795	condition on vs pre
ACAT1	4829.39	TRUE	-4.39054	1.13071e-05	0.000437454	-2.12514	condition on vs pre
HPN	6307.27	TRUE	-4.38574	1.15592e-05	0.00044644	-3.16973	condition on vs pre
CCL5	1362.51	TRUE	-4.38299	1.17063e-05	0.000450897	-1.71118	condition on vs pre
PI16	628.108	TRUE	-4.38283	1.17147e-05	0.000450897	-4.96964	condition on vs pre
IFI6	7198.72	TRUE	-4.37985	1.18763e-05	0.000456333	-2.28882	condition on vs pre
SPINK1	361.185	TRUE	-4.37867	1.19403e-05	0.000458011	-5.36256	condition on vs pre
SLC16A1	824.976	TRUE	-4.36881	1.24926e-05	0.00047838	-2.03747	condition on vs pre
MBNL3	765.141	TRUE	-4.36789	1.25452e-05	0.000479578	-1.73508	condition on vs pre
SMOC1	285.024	TRUE	-4.36672	1.26127e-05	0.000481337	-3.0871	condition on vs pre
FCAMR	57.2594	TRUE	-4.36542	1.26877e-05	0.000483379	-6.77644	condition on vs pre
LRCOL1	108.697	TRUE	-4.36484	1.27213e-05	0.000483841	-4.91435	condition on vs pre
CLCA2	72.9931	TRUE	-4.35691	1.31914e-05	0.000500871	-5.79973	condition on vs pre
DMTN	388.113	TRUE	-4.35575	1.3261e-05	0.000502667	-2.4004	condition on vs pre
LRRC3	480.458	TRUE	-4.35316	1.3419e-05	0.000507799	-2.71571	condition on vs pre
ACAA2	4941.01	TRUE	-4.3487	1.36949e-05	0.000517368	-2.15241	condition on vs pre
FNDC4	539.23	TRUE	-4.34379	1.40046e-05	0.00052734	-2.78861	condition on vs pre
INPP5J	3706.93	TRUE	4.34377	1.40058e-05	0.00052734	2.06065	condition on vs pre
NTRK2	610.518	TRUE	-4.34266	1.40768e-05	0.000529126	-2.02078	condition on vs pre
ST6GAL1	5006.02	TRUE	-4.34159	1.41456e-05	0.000530825	-3.05722	condition on vs pre
IGKV3-15	1388.59	TRUE	-4.34057	1.42116e-05	0.000532413	-2.20724	condition on vs pre
TNK1	1078.65	TRUE	4.34017	1.42372e-05	0.000532487	2.10135	condition on vs pre
AKR1C6P	60.3955	TRUE	-4.33849	1.43464e-05	0.000535677	-5.81808	condition on vs pre
HNF1B	92.1779	TRUE	-4.33652	1.44756e-05	0.000539605	-4.54971	condition on vs pre
PLIN4	4956.14	TRUE	-4.33284	1.47195e-05	0.000546886	-3.60413	condition on vs pre
UGT2A3	92.7606	TRUE	-4.33317	1.4698e-05	0.000546886	-5.48089	condition on vs pre
S100G	427.541	TRUE	-4.32914	1.49694e-05	0.000554336	-5.52228	condition on vs pre
SLC6A13	314.465	TRUE	-4.32946	1.49478e-05	0.000554336	-4.07494	condition on vs pre
CLEC1B	40.7397	TRUE	-4.32778	1.50623e-05	0.000555944	-6.11761	condition on vs pre
NTRK3	260.281	TRUE	-4.32788	1.50554e-05	0.000555944	-2.32967	condition on vs pre
CXCL13	92.8424	TRUE	-4.32487	1.52624e-05	0.000562408	-4.24155	condition on vs pre
AGMO	469.165	TRUE	-4.32306	1.53881e-05	0.00056611	-4.15134	condition on vs pre
GPR88	87.3004	TRUE	-4.32264	1.54173e-05	0.00056626	-3.72872	condition on vs pre
U91324.1	45.1737	TRUE	-4.31616	1.58768e-05	0.000582184	-8.18989	condition on vs pre
ETNPPL	112.596	TRUE	-4.31126	1.62326e-05	0.000594261	-3.36913	condition on vs pre
BCL11B	204.97	TRUE	-4.31072	1.62722e-05	0.000594743	-2.95058	condition on vs pre
TRAC	531.427	TRUE	-4.30622	1.66064e-05	0.000605972	-2.05564	condition on vs pre
AC006037.2	48.0434	TRUE	-4.30485	1.67101e-05	0.000608691	-7.56953	condition on vs pre
AP003900.1	96.5422	TRUE	-4.30452	1.67351e-05	0.000608691	-7.78148	condition on vs pre
RAMP1	1807.13	TRUE	-4.30216	1.69142e-05	0.000614212	-2.07897	condition on vs pre
AKR1B10	666.015	TRUE	-4.30095	1.70064e-05	0.000616563	-4.5146	condition on vs pre
LYZ	5440.11	TRUE	-4.29595	1.7395e-05	0.000629637	-1.79202	condition on vs pre
KDM8	889.793	TRUE	-4.2911	1.77786e-05	0.000642489	-1.71418	condition on vs pre
CYBB	1379.06	TRUE	-4.28958	1.79015e-05	0.00064589	-1.61397	condition on vs pre
CRHBP	225.789	TRUE	-4.27894	1.87784e-05	0.000676443	-3.91098	condition on vs pre
AQP3	1098.84	TRUE	-4.27182	1.93884e-05	0.000697301	-3.06972	condition on vs pre
SAT2	3225.36	TRUE	-4.27057	1.94971e-05	0.000700089	-1.62816	condition on vs pre
ART4	1369.37	TRUE	-4.26948	1.9593e-05	0.00070027	-4.90302	condition on vs pre
C1QC	4274.51	TRUE	-4.26973	1.95707e-05	0.00070027	-1.4555	condition on vs pre
TSPAN33	643.538	TRUE	-4.26945	1.95956e-05	0.00070027	-2.50571	condition on vs pre
AC083841.1	37.2154	TRUE	-4.26736	1.97804e-05	0.000705248	-6.07127	condition on vs pre
CHST13	235.498	TRUE	-4.26716	1.97976e-05	0.000705248	-3.55423	condition on vs pre
UGT2B17	115.461	TRUE	-4.26533	1.99607e-05	0.000709931	-4.10084	condition on vs pre
TFPI2	2985.34	TRUE	-4.26188	2.02714e-05	0.000719842	-4.11248	condition on vs pre
IGFALS	771.419	TRUE	-4.25896	2.05377e-05	0.000727759	-2.55264	condition on vs pre
TENM4	501.962	TRUE	4.25873	2.05591e-05	0.000727759	2.1818	condition on vs pre
SLAMF7	753.238	TRUE	-4.25746	2.06767e-05	0.000730772	-2.18967	condition on vs pre
EPHX1	9010.63	TRUE	-4.25675	2.07416e-05	0.000731913	-1.47405	condition on vs pre
TRBC2	709.387	TRUE	-4.25574	2.08362e-05	0.000734102	-1.83086	condition on vs pre
CCL2	616.818	TRUE	-4.25357	2.10386e-05	0.000740072	-1.85286	condition on vs pre
C11orf21	220.215	TRUE	-4.25052	2.13274e-05	0.000749058	-2.44456	condition on vs pre
CCDC152	866.049	TRUE	-4.24903	2.147e-05	0.00075289	-1.98869	condition on vs pre
AC008738.3	614.933	TRUE	-4.24607	2.17548e-05	0.000761689	-2.40357	condition on vs pre
CPNE7	8839.27	TRUE	4.24245	2.21093e-05	0.000772896	2.2976	condition on vs pre
AASS	1350.82	TRUE	-4.2413	2.2223e-05	0.000774463	-2.16915	condition on vs pre
CD247	219.295	TRUE	-4.24159	2.21938e-05	0.000774463	-2.54909	condition on vs pre
SFRP5	116.77	TRUE	-4.23935	2.2417e-05	0.000780013	-5.0124	condition on vs pre
XCL1	209.852	TRUE	-4.23844	2.25079e-05	0.000781967	-5.26714	condition on vs pre
CAPN3	638.019	TRUE	-4.23117	2.32482e-05	0.000806438	-1.72141	condition on vs pre
LDHD	1342.72	TRUE	-4.22901	2.34717e-05	0.000812939	-2.64263	condition on vs pre
HORMAD2-AS1	41.1846	TRUE	-4.22558	2.38324e-05	0.000824162	-7.03058	condition on vs pre
ARMCX7P	160.33	TRUE	-4.22262	2.41475e-05	0.000833774	-7.06024	condition on vs pre
SLC6A12	612.025	TRUE	-4.21385	2.51057e-05	0.000865529	-3.41692	condition on vs pre
CYB5A	11791.8	TRUE	-4.2101	2.55257e-05	0.000878664	-1.53387	condition on vs pre
PDZK1IP1	245.261	TRUE	-4.20898	2.56527e-05	0.000881685	-3.02616	condition on vs pre
CTSC	3144	TRUE	-4.2041	2.62119e-05	0.000899529	-2.20252	condition on vs pre
IGKV1-9	836.512	TRUE	-4.19218	2.76287e-05	0.000946704	-2.91275	condition on vs pre
CFL2	1034.33	TRUE	-4.19139	2.77251e-05	0.00094856	-1.82705	condition on vs pre
SALL1	236.349	TRUE	-4.18408	2.86324e-05	0.000978114	-4.46764	condition on vs pre
HLA-A	25561.3	TRUE	-4.17813	2.93918e-05	0.00100253	-1.33761	condition on vs pre
LYNX1	472.457	TRUE	-4.17124	3.02945e-05	0.00103176	-1.87622	condition on vs pre
HNF1A-AS1	313.247	TRUE	-4.16108	3.16745e-05	0.00107712	-2.01221	condition on vs pre
IGHG1	97040.1	TRUE	-4.16061	3.17395e-05	0.0010777	-2.00677	condition on vs pre
AC087164.2	85.0159	TRUE	-4.15734	3.21969e-05	0.00109159	-3.62955	condition on vs pre
CEBPD	2846.65	TRUE	-4.14306	3.42699e-05	0.00116012	-1.42038	condition on vs pre
FOLR2	584.468	TRUE	-4.14268	3.43276e-05	0.00116033	-2.41762	condition on vs pre
HHEX	701.22	TRUE	-4.14021	3.46992e-05	0.00116937	-2.06822	condition on vs pre
PROS1	1747.64	TRUE	-4.14037	3.46751e-05	0.00116937	-2.47023	condition on vs pre
PHGDH	1405.72	TRUE	-4.13468	3.55455e-05	0.00119609	-1.78128	condition on vs pre
CLEC10A	121.429	TRUE	-4.1267	3.68012e-05	0.0012365	-3.40854	condition on vs pre
LYVE1	176.59	TRUE	-4.1243	3.71859e-05	0.00124756	-3.01793	condition on vs pre
NOSTRIN	784.009	TRUE	-4.12395	3.72435e-05	0.00124763	-1.70796	condition on vs pre
DPT	2575.85	TRUE	-4.12201	3.75574e-05	0.00125627	-2.54685	condition on vs pre
TRPV6	240.718	TRUE	-4.11754	3.82932e-05	0.00127898	-2.87845	condition on vs pre
AC132217.1	992.225	TRUE	-4.11062	3.94605e-05	0.00131601	-2.7451	condition on vs pre
ADRA1A	184.037	TRUE	-4.10037	4.12499e-05	0.00137328	-2.56796	condition on vs pre
EGFR	1103.07	TRUE	-4.10009	4.12998e-05	0.00137328	-2.48221	condition on vs pre
IGHV1-2	321.376	TRUE	-4.09785	4.17005e-05	0.00138456	-5.92964	condition on vs pre
C3orf85	31.9073	TRUE	-4.09128	4.29007e-05	0.0014223	-8.26191	condition on vs pre
PRR12	3617.84	TRUE	4.08241	4.4571e-05	0.0014755	1.91611	condition on vs pre
NT5E	702.669	TRUE	-4.07842	4.53434e-05	0.00149887	-2.10242	condition on vs pre
GPR174	153.48	TRUE	-4.07722	4.55783e-05	0.00150442	-2.58964	condition on vs pre
HLA-H	3957.24	TRUE	-4.0762	4.57771e-05	0.00150877	-1.38167	condition on vs pre
CD53	1240.41	TRUE	-4.06773	4.74729e-05	0.00156237	-1.71524	condition on vs pre
GATA6-AS1	130.194	TRUE	-4.05726	4.96521e-05	0.0016317	-2.70086	condition on vs pre
SLC4A4	246.674	TRUE	-4.05495	5.01454e-05	0.0016455	-3.6481	condition on vs pre
LCAT	1462.91	TRUE	-4.05217	5.0744e-05	0.00166272	-1.59724	condition on vs pre
PCK2	5665.63	TRUE	-4.04761	5.1744e-05	0.00169301	-1.5917	condition on vs pre
GPR157	2469.65	TRUE	4.04518	5.22838e-05	0.00170819	1.78434	condition on vs pre
FMO2	822.817	TRUE	-4.04462	5.24081e-05	0.00170977	-2.06066	condition on vs pre
IGHGP	7717.82	TRUE	-4.04285	5.2806e-05	0.00172025	-2.32504	condition on vs pre
APLNR	2151.66	TRUE	-4.04143	5.31256e-05	0.00172816	-1.6476	condition on vs pre
GPT2	3173.64	TRUE	-4.04048	5.33417e-05	0.00173268	-1.67694	condition on vs pre
ANGPTL1	203.955	TRUE	-4.03954	5.35559e-05	0.00173713	-2.41526	condition on vs pre
ERICH5	60.0176	TRUE	-4.03665	5.42193e-05	0.00175611	-5.47996	condition on vs pre
IKZF1	446.908	TRUE	-4.03403	5.48279e-05	0.00177327	-1.829	condition on vs pre
AL139384.1	103.921	TRUE	-4.02756	5.63593e-05	0.00182018	-3.70421	condition on vs pre
COL2A1	976.521	TRUE	4.01859	5.85485e-05	0.00188276	4.03117	condition on vs pre
S100A8	332.65	TRUE	-4.01864	5.85357e-05	0.00188276	-3.74357	condition on vs pre
SEMA4D	2076.69	TRUE	-4.01861	5.85433e-05	0.00188276	-2.33864	condition on vs pre
SERPINA5	4546.77	TRUE	-4.01263	6.00465e-05	0.00192818	-3.77691	condition on vs pre
ANXA13	144.646	TRUE	-4.00704	6.14844e-05	0.00196928	-2.95133	condition on vs pre
TMEM56	964.297	TRUE	-4.00697	6.15016e-05	0.00196928	-2.85881	condition on vs pre
C19orf66	2780.18	TRUE	-4.00605	6.17419e-05	0.00197009	-1.47849	condition on vs pre
FSIP1	1011.34	TRUE	4.00606	6.17403e-05	0.00197009	3.82786	condition on vs pre
IGHG3	16098.5	TRUE	-4.00587	6.17899e-05	0.00197009	-2.43711	condition on vs pre
FP236241.1	154.572	TRUE	4.00474	6.20846e-05	0.00197668	7.18406	condition on vs pre
HOGA1	539.495	TRUE	-4.00375	6.23466e-05	0.00198222	-2.66981	condition on vs pre
ADAMDEC1	187.195	TRUE	-3.99695	6.41645e-05	0.00203713	-2.73419	condition on vs pre
AC136443.1	34.826	TRUE	-3.99162	6.56236e-05	0.00208052	-8.00394	condition on vs pre
SORBS1	2465.56	TRUE	-3.988	6.66324e-05	0.00210952	-2.11265	condition on vs pre
APOL6	2686.65	TRUE	-3.9834	6.79373e-05	0.00214781	-1.79889	condition on vs pre
AP006285.1	30.5306	TRUE	-3.97956	6.90441e-05	0.00217668	-8.19252	condition on vs pre
SLC5A1	176.098	TRUE	-3.97978	6.89796e-05	0.00217668	-4.43718	condition on vs pre
NSG1	143.095	TRUE	3.979	6.92071e-05	0.00217876	4.27079	condition on vs pre
CES2	5651.13	TRUE	-3.97828	6.94163e-05	0.00218229	-2.10364	condition on vs pre
GZMB	103.262	TRUE	-3.97641	6.99631e-05	0.00219641	-3.24767	condition on vs pre
IGFBP3	5890.56	TRUE	-3.97546	7.02438e-05	0.00220215	-1.65152	condition on vs pre
HERC5	285.995	TRUE	-3.97132	7.14766e-05	0.00223768	-2.09169	condition on vs pre
STAB1	5416.52	TRUE	-3.9705	7.17213e-05	0.00224221	-1.44076	condition on vs pre
AC018467.1	49.5292	TRUE	-3.96826	7.23998e-05	0.00226028	-7.74167	condition on vs pre
ATP2A1	240.097	TRUE	3.95646	7.60671e-05	0.00237148	2.26595	condition on vs pre
GCHFR	1208	TRUE	-3.95481	7.65952e-05	0.00238463	-1.65039	condition on vs pre
RTP4	206.112	TRUE	-3.95075	7.79058e-05	0.00242208	-2.1768	condition on vs pre
ROBO2	241.001	TRUE	3.94249	8.06396e-05	0.00250361	4.80388	condition on vs pre
TRBC1	455.348	TRUE	-3.93853	8.19813e-05	0.00254176	-1.9902	condition on vs pre
S100B	128.194	TRUE	-3.93525	8.31098e-05	0.0025732	-4.80582	condition on vs pre
SPX	76.278	TRUE	-3.93215	8.41884e-05	0.00260301	-3.57925	condition on vs pre
SELL	239.724	TRUE	-3.92697	8.60227e-05	0.00265607	-2.62897	condition on vs pre
PAQR9	92.924	TRUE	-3.92499	8.67331e-05	0.00267433	-5.58549	condition on vs pre
ZIC1	611.139	TRUE	-3.92356	8.72512e-05	0.00268662	-4.58376	condition on vs pre
OAS1	1533.33	TRUE	-3.921	8.8182e-05	0.00271157	-1.65928	condition on vs pre
SLC17A9	1834.87	TRUE	-3.91583	9.00944e-05	0.00276659	-2.17313	condition on vs pre
KLK4	212.248	TRUE	3.90702	9.3443e-05	0.0028655	3.44418	condition on vs pre
KCNC3	878.592	TRUE	3.90629	9.37235e-05	0.00287019	1.66978	condition on vs pre
EPSTI1	677.256	TRUE	-3.9053	9.41092e-05	0.00287597	-1.56627	condition on vs pre
SERPINA1	136458	TRUE	-3.90515	9.41682e-05	0.00287597	-6.28594	condition on vs pre
FAM89A	304.415	TRUE	-3.90391	9.46515e-05	0.00288681	-1.94998	condition on vs pre
GABARAPL1	2200.62	TRUE	-3.90263	9.5155e-05	0.00289823	-1.69069	condition on vs pre
MOGAT3	254.587	TRUE	-3.90067	9.59273e-05	0.0029178	-2.51916	condition on vs pre
GNMT	624.906	TRUE	-3.89504	9.81839e-05	0.0029824	-3.57018	condition on vs pre
CAT	5712.05	TRUE	-3.89445	9.84213e-05	0.00298558	-1.3116	condition on vs pre
PLPPR1	97.5492	TRUE	-3.89129	9.97131e-05	0.00302069	-5.24509	condition on vs pre
GPR183	187.291	TRUE	-3.88987	0.000100299	0.00303434	-2.726	condition on vs pre
SLC47A1	989.266	TRUE	-3.88921	0.000100573	0.00303854	-2.14963	condition on vs pre
IGHV3-7	1234.48	TRUE	-3.88707	0.000101463	0.00306004	-2.97527	condition on vs pre
PEMT	1054.93	TRUE	-3.88684	0.000101556	0.00306004	-1.58101	condition on vs pre
IGKV3-20	1698.92	TRUE	-3.87965	0.000104608	0.00314777	-2.8711	condition on vs pre
BST2	8865.96	TRUE	-3.87436	0.000106903	0.00321254	-1.6221	condition on vs pre
AC012065.3	78.3918	TRUE	-3.8706	0.000108567	0.00325818	-3.79272	condition on vs pre
CTSL	5300.03	TRUE	-3.86867	0.000109431	0.00327705	-1.31369	condition on vs pre
FENDRR	172.698	TRUE	-3.86854	0.000109488	0.00327705	-5.51898	condition on vs pre
SRGN	1411.84	TRUE	-3.86325	0.000111889	0.00334446	-1.83131	condition on vs pre
AP002026.1	129.569	TRUE	-3.85755	0.000114531	0.00341889	-2.80564	condition on vs pre
TFEC	293.358	TRUE	-3.85702	0.000114776	0.00342167	-2.00792	condition on vs pre
MMP7	300.498	TRUE	-3.849	0.000118602	0.00353104	-2.41634	condition on vs pre
RCL1	1012.6	TRUE	-3.8471	0.000119525	0.00355383	-1.63561	condition on vs pre
CXCL12	4675.46	TRUE	-3.84447	0.000120811	0.00358257	-1.33092	condition on vs pre
SOD2	11284.9	TRUE	-3.84448	0.000120811	0.00358257	-1.87507	condition on vs pre
SLC26A1	1196.43	TRUE	3.84213	0.00012197	0.00361217	2.30772	condition on vs pre
ADGRD1	258.611	TRUE	-3.83916	0.000123454	0.00365132	-2.25174	condition on vs pre
FYB2	254.533	TRUE	-3.83797	0.000124056	0.00366429	-2.82756	condition on vs pre
ADIPOQ	3438.76	TRUE	-3.83744	0.000124325	0.00366743	-3.58939	condition on vs pre
DHRS9	127.455	TRUE	-3.83498	0.000125573	0.00369938	-2.58979	condition on vs pre
SKAP1	414.49	TRUE	-3.83449	0.000125828	0.00370203	-3.55669	condition on vs pre
SLCO2B1	3262.63	TRUE	-3.83048	0.000127891	0.00375783	-1.88675	condition on vs pre
CDH19	90.2418	TRUE	-3.82447	0.000131052	0.00384566	-6.06357	condition on vs pre
IFI30	7669.74	TRUE	-3.82094	0.000132946	0.00389617	-1.35263	condition on vs pre
A2M	21420.3	TRUE	-3.81317	0.000137193	0.00400321	-2.05351	condition on vs pre
AC109460.4	69.4158	TRUE	-3.81296	0.000137311	0.00400321	-7.23841	condition on vs pre
GALT	1230.76	TRUE	-3.81333	0.000137106	0.00400321	-1.41384	condition on vs pre
S100A9	868.357	TRUE	-3.81376	0.00013687	0.00400321	-3.04048	condition on vs pre
BCO2	506.969	TRUE	-3.803	0.000142952	0.00416228	-2.36238	condition on vs pre
FAM149A	240.109	TRUE	-3.80005	0.000144666	0.00420673	-2.57999	condition on vs pre
FGL2	657.502	TRUE	-3.7975	0.000146166	0.00424484	-1.64899	condition on vs pre
CXCR2P1	74.9559	TRUE	-3.79688	0.000146527	0.00424984	-3.81334	condition on vs pre
FAM47E-STBD1	711.749	TRUE	-3.79503	0.000147625	0.00427618	-2.0887	condition on vs pre
FGF2	172.715	TRUE	-3.79383	0.000148341	0.00428586	-2.662	condition on vs pre
SLC15A1	240.058	TRUE	-3.79399	0.000148245	0.00428586	-2.3429	condition on vs pre
AL627309.5	1417.59	TRUE	3.78854	0.000151536	0.00437256	2.32645	condition on vs pre
UGT2A1	72.5385	TRUE	-3.78763	0.000152092	0.00438299	-3.74277	condition on vs pre
NDUFA6-DT	1017.49	TRUE	-3.78684	0.000152573	0.00439122	-1.78009	condition on vs pre
EFNA2	87.2469	TRUE	-3.78382	0.000154437	0.00443917	-3.70428	condition on vs pre
WFDC2	2279.55	TRUE	-3.77953	0.000157125	0.00451069	-2.62271	condition on vs pre
FAM20A	1138.41	TRUE	-3.77872	0.000157636	0.00451957	-2.48769	condition on vs pre
CYP2A13	44.361	TRUE	-3.77723	0.000158584	0.00454094	-7.29819	condition on vs pre
LTF	1342.69	TRUE	-3.7755	0.000159686	0.00456671	-2.75606	condition on vs pre
ENPP7	111.104	TRUE	-3.77483	0.000160118	0.00456741	-3.90959	condition on vs pre
GNLY	201.887	TRUE	-3.77499	0.000160011	0.00456741	-2.3769	condition on vs pre
MPEG1	1168.93	TRUE	-3.77413	0.000160564	0.00457062	-1.49751	condition on vs pre
PFKFB4	1138.02	TRUE	3.77402	0.000160637	0.00457062	1.52895	condition on vs pre
GLP2R	82.1541	TRUE	-3.768	0.000164561	0.00467636	-4.51143	condition on vs pre
TTC38	2053.97	TRUE	-3.7641	0.00016715	0.00474394	-2.38425	condition on vs pre
CCR5	307.158	TRUE	-3.7616	0.000168828	0.0047675	-1.84482	condition on vs pre
HLA-DRA	14456.6	TRUE	-3.76165	0.000168794	0.0047675	-1.23159	condition on vs pre
IFITM2	11812.8	TRUE	-3.76224	0.000168397	0.0047675	-1.2947	condition on vs pre
MUC5B	8182.9	TRUE	-3.7622	0.000168426	0.0047675	-3.4591	condition on vs pre
MIRLET7BHG	1303.83	TRUE	3.76002	0.000169901	0.00479177	1.81105	condition on vs pre
CD48	483.501	TRUE	-3.7591	0.000170524	0.0048033	-2.05814	condition on vs pre
ADRA1B	213.178	TRUE	-3.75879	0.000170738	0.00480331	-3.51475	condition on vs pre
RHBDL3	221.326	TRUE	-3.75785	0.00017138	0.00481534	-2.54252	condition on vs pre
REEP6	3694.43	TRUE	-3.75682	0.000172085	0.00482912	-1.44331	condition on vs pre
SDC2	2701.23	TRUE	-3.75584	0.000172761	0.00484206	-1.67746	condition on vs pre
AFP	49.3861	TRUE	-3.7499	0.000176903	0.00493966	-7.36974	condition on vs pre
CYP4F23P	620.785	TRUE	3.75016	0.00017672	0.00493966	1.99619	condition on vs pre
GOLT1A	376.704	TRUE	-3.75031	0.000176617	0.00493966	-2.79107	condition on vs pre
IGHA1	5819.61	TRUE	-3.74652	0.000179304	0.0050005	-1.94439	condition on vs pre
AL158066.1	93.6046	TRUE	3.74539	0.000180113	0.00501062	6.70875	condition on vs pre
IFIT3	1241.86	TRUE	-3.74556	0.000179993	0.00501062	-1.41532	condition on vs pre
AC005726.4	49.6448	TRUE	-3.74342	0.000181532	0.00504384	-6.61837	condition on vs pre
AC090340.1	38.191	TRUE	-3.74069	0.000183514	0.00509197	-5.79058	condition on vs pre
TPSD1	198.313	TRUE	3.74041	0.000183717	0.00509197	3.04059	condition on vs pre
MARC2	1931.91	TRUE	-3.73588	0.000187057	0.00517816	-1.44799	condition on vs pre
CIDEB	1909.06	TRUE	-3.73419	0.000188321	0.00520039	-3.17841	condition on vs pre
PLEK2	401.028	TRUE	-3.73419	0.000188323	0.00520039	-2.04962	condition on vs pre
VAMP5	1283.68	TRUE	-3.73376	0.000188642	0.00520282	-1.76135	condition on vs pre
IGKV1-16	1065.35	TRUE	-3.72794	0.000193051	0.00531791	-3.00032	condition on vs pre
AC244100.3	41.4733	TRUE	-3.7214	0.00019812	0.00544417	-5.73321	condition on vs pre
ITM2A	644.773	TRUE	-3.72143	0.0001981	0.00544417	-1.94851	condition on vs pre
ALAS1	2165.18	TRUE	-3.72012	0.000199126	0.00546514	-1.53097	condition on vs pre
CDA	210.843	TRUE	-3.71744	0.000201249	0.00550379	-3.23209	condition on vs pre
DHRS3	3606.78	TRUE	-3.71742	0.000201269	0.00550379	-1.25929	condition on vs pre
HNF4A-AS1	37.6099	TRUE	-3.71779	0.000200975	0.00550379	-5.91022	condition on vs pre
CTH	297.285	TRUE	-3.71579	0.000202567	0.00552596	-2.44191	condition on vs pre
TCF21	145.316	TRUE	-3.71579	0.000202571	0.00552596	-5.50078	condition on vs pre
COL21A1	164.57	TRUE	-3.7126	0.000205144	0.00558937	-2.23018	condition on vs pre
FERMT2	2167.56	TRUE	-3.71219	0.000205473	0.00559156	-1.30997	condition on vs pre
AC080128.1	24.8311	TRUE	-3.71043	0.000206909	0.00562382	-8.09946	condition on vs pre
IGKV1D-33	653.683	TRUE	-3.70325	0.000212857	0.0057785	-3.7173	condition on vs pre
ARMCX2	1387.09	TRUE	3.70183	0.000214052	0.00580392	1.81618	condition on vs pre
TIMP1	13319.5	TRUE	-3.69923	0.000216257	0.00585665	-1.46699	condition on vs pre
ACY3	238.844	TRUE	-3.69719	0.000217997	0.00589668	-4.57986	condition on vs pre
TDRD6	137.027	TRUE	-3.69093	0.000223435	0.0060365	-3.7454	condition on vs pre
IFIH1	886.207	TRUE	-3.68966	0.000224554	0.00605946	-1.88882	condition on vs pre
OIT3	329.466	TRUE	-3.68442	0.000229222	0.00617799	-3.23269	condition on vs pre
SELE	150.893	TRUE	-3.67857	0.000234547	0.00631394	-2.54277	condition on vs pre
ADAMTS6	269.728	TRUE	-3.65662	0.000255564	0.00687149	-1.96258	condition on vs pre
SCARA5	113.823	TRUE	-3.65351	0.00025868	0.00694698	-3.87294	condition on vs pre
SLAMF6	170.289	TRUE	-3.64714	0.000265176	0.00711293	-2.48681	condition on vs pre
HLA-B	34939.1	TRUE	-3.6459	0.000266462	0.0071389	-1.38573	condition on vs pre
PLSCR1	1319.68	TRUE	-3.64433	0.000268087	0.00717389	-1.70031	condition on vs pre
COLEC11	1705.7	TRUE	-3.64067	0.000271933	0.00726815	-3.26317	condition on vs pre
CD1D	179.609	TRUE	-3.64016	0.000272467	0.00727376	-2.81617	condition on vs pre
AOC4P	90.1006	TRUE	-3.63918	0.000273509	0.00729293	-3.01784	condition on vs pre
NKX3-1	357.708	TRUE	-3.63647	0.0002764	0.00736129	-2.98171	condition on vs pre
STEAP4	1453.03	TRUE	-3.63133	0.000281965	0.00750061	-1.97418	condition on vs pre
GSTM1	1136.17	TRUE	-3.62482	0.000289163	0.00768297	-2.51957	condition on vs pre
IGHV3-30	2362.05	TRUE	-3.62201	0.000292322	0.00774859	-1.46361	condition on vs pre
PYGL	1787.73	TRUE	-3.62204	0.000292289	0.00774859	-1.66499	condition on vs pre
CES5A	34.1722	TRUE	-3.62025	0.000294315	0.00778308	-6.05931	condition on vs pre
IDUA	3488.5	TRUE	3.62027	0.000294293	0.00778308	1.63613	condition on vs pre
IGHV1-18	1653.21	TRUE	-3.61792	0.000296977	0.00784425	-3.62815	condition on vs pre
DCPS	1654.37	TRUE	-3.61735	0.000297638	0.00784848	-1.606	condition on vs pre
PLEK	795.381	TRUE	-3.61718	0.000297836	0.00784848	-1.61904	condition on vs pre
SHBG	193.897	TRUE	-3.61302	0.000302655	0.00796614	-4.02039	condition on vs pre
LY75-CD302	85.6665	TRUE	-3.60906	0.000307314	0.0080793	-7.53029	condition on vs pre
CLU	26905	TRUE	-3.6051	0.000312037	0.0081939	-2.18976	condition on vs pre
FAM151A	91.489	TRUE	-3.60294	0.000314638	0.00825256	-4.68817	condition on vs pre
CYP11A1	58.5074	TRUE	-3.60183	0.000315986	0.00826862	-3.80347	condition on vs pre
HLA-J	1013.93	TRUE	-3.60206	0.000315703	0.00826862	-1.78657	condition on vs pre
MT1JP	63.095	TRUE	-3.59971	0.000318577	0.00832672	-4.73396	condition on vs pre
MZB1	1152.35	TRUE	-3.5977	0.000321043	0.0083717	-1.56821	condition on vs pre
NCAM1	348.775	TRUE	-3.59795	0.000320741	0.0083717	-1.9934	condition on vs pre
IRF8	863.187	TRUE	-3.5973	0.00032154	0.00837495	-1.45856	condition on vs pre
LINC00659	28.4254	TRUE	-3.59642	0.000322622	0.0083934	-6.40508	condition on vs pre
KLB	311.757	TRUE	-3.59506	0.000324316	0.00842771	-1.74374	condition on vs pre
SLC1A1	828.634	TRUE	-3.59465	0.000324832	0.00843137	-2.37475	condition on vs pre
TTC36	1193.24	TRUE	-3.59418	0.000325411	0.00843666	-1.71627	condition on vs pre
SH2D4A	1213.37	TRUE	-3.59017	0.000330463	0.00855778	-2.29691	condition on vs pre
CC2D1B	2304.88	TRUE	3.58889	0.000332094	0.00859011	1.59148	condition on vs pre
CD2	328.423	TRUE	-3.58853	0.000332545	0.00859189	-2.12289	condition on vs pre
AL391095.2	32.3816	TRUE	-3.587	0.00033451	0.00863273	-5.28374	condition on vs pre
BIRC3	558.85	TRUE	-3.58629	0.000335414	0.00863623	-2.08904	condition on vs pre
PSCA	6330.36	TRUE	-3.58631	0.000335396	0.00863623	-1.58984	condition on vs pre
AP000355.1	35.1099	TRUE	-3.58554	0.000336383	0.00865128	-5.3209	condition on vs pre
ALDH6A1	3637.01	TRUE	-3.56581	0.000362734	0.00931833	-1.22825	condition on vs pre
JAML	880.546	TRUE	-3.56277	0.000366969	0.00941635	-2.27231	condition on vs pre
AC026803.3	94.1634	TRUE	-3.56052	0.00037012	0.00948116	-2.80342	condition on vs pre
MYRF	290.03	TRUE	-3.56037	0.000370338	0.00948116	-2.70819	condition on vs pre
AC013717.1	77.7005	TRUE	-3.55962	0.000371398	0.00949747	-3.99371	condition on vs pre
TSPAN6	929.956	TRUE	-3.55823	0.000373356	0.00953669	-1.50379	condition on vs pre
IL27	118.412	TRUE	-3.55781	0.000373955	0.00954115	-3.31924	condition on vs pre
IL1R2	75.5212	TRUE	-3.55658	0.000375707	0.00957499	-3.28083	condition on vs pre
ERRFI1	3941.56	TRUE	-3.55158	0.000382925	0.00974788	-1.37001	condition on vs pre
AC131392.1	69.3319	TRUE	3.55104	0.000383716	0.00975698	6.52552	condition on vs pre
PSMC1P1	462.709	TRUE	-3.55072	0.000384173	0.00975756	-2.37864	condition on vs pre
CHRDL1	627.3	TRUE	-3.54509	0.000392477	0.00995723	-3.65392	condition on vs pre
AKAP12	1074.38	TRUE	-3.54132	0.000398125	0.0100891	-1.53207	condition on vs pre
DEPDC7	271.268	TRUE	-3.54007	0.000400019	0.0101257	-3.15411	condition on vs pre
ZDHHC2	382.876	TRUE	-3.53774	0.000403564	0.0102039	-1.65642	condition on vs pre
AC009084.3	273.52	TRUE	-3.53624	0.000405871	0.0102507	-2.13061	condition on vs pre
CHTF18	3929.22	TRUE	3.53085	0.000414223	0.0104499	1.44918	condition on vs pre
CYP4F8	379.519	TRUE	3.52888	0.00041733	0.0105165	3.18321	condition on vs pre
CD52	488.061	TRUE	-3.52557	0.000422575	0.0106368	-1.90003	condition on vs pre
PTHLH	158.225	TRUE	-3.52428	0.000424641	0.0106768	-2.46851	condition on vs pre
BBOX1	61.4264	TRUE	-3.51922	0.000432824	0.0108704	-4.96271	condition on vs pre
ZG16	147.788	TRUE	-3.51694	0.000436555	0.0109519	-3.03231	condition on vs pre
CHRD	2916.53	TRUE	-3.51658	0.000437146	0.0109545	-1.74334	condition on vs pre
LINC02362	194.967	TRUE	-3.51606	0.000438004	0.0109638	-2.78209	condition on vs pre
AL390719.2	682.104	TRUE	3.51446	0.000440648	0.0110177	1.62974	condition on vs pre
AGPAT2	3162.66	TRUE	-3.51403	0.000441363	0.0110233	-1.36032	condition on vs pre
SLC16A7	362.584	TRUE	-3.51367	0.000441964	0.0110261	-1.64795	condition on vs pre
CAVIN2	366.084	TRUE	-3.51286	0.000443307	0.0110473	-2.08019	condition on vs pre
SLC25A20	1214.09	TRUE	-3.50993	0.00044822	0.0111574	-1.50277	condition on vs pre
IGKV3-11	641.586	TRUE	-3.50956	0.000448843	0.0111605	-3.32521	condition on vs pre
PLIN2	2541.91	TRUE	-3.50513	0.000456392	0.0113357	-1.53399	condition on vs pre
MAP7D3	483.617	TRUE	-3.5031	0.000459872	0.0114095	-1.88248	condition on vs pre
ICAM3	766.859	TRUE	-3.50228	0.000461286	0.011432	-1.77302	condition on vs pre
ECHDC2	9954.52	TRUE	-3.50102	0.000463483	0.0114738	-1.24862	condition on vs pre
AGMAT	574.399	TRUE	-3.49811	0.00046856	0.0115867	-1.89742	condition on vs pre
AL138826.1	24.7665	TRUE	-3.49475	0.00047451	0.0117209	-7.75562	condition on vs pre
KANK1	1942.27	TRUE	-3.49371	0.000476361	0.0117537	-1.24892	condition on vs pre
HLA-DPA1	7543.72	TRUE	-3.49103	0.000481165	0.0118592	-1.17344	condition on vs pre
CD302	1194.81	TRUE	-3.4905	0.000482116	0.0118697	-2.02365	condition on vs pre
DAPK1	1861.17	TRUE	-3.48799	0.000486665	0.0119686	-1.79533	condition on vs pre
GATA5	44.1775	TRUE	-3.48601	0.000490282	0.0120443	-5.24173	condition on vs pre
LIG3	3470.57	TRUE	3.4852	0.000491774	0.0120678	1.3744	condition on vs pre
GZMA	170.252	TRUE	-3.48072	0.000500059	0.0122577	-2.31308	condition on vs pre
ASL	3141.18	TRUE	-3.47866	0.000503935	0.0123393	-1.35185	condition on vs pre
XAF1	3676.74	TRUE	-3.47702	0.000507021	0.0124013	-1.44601	condition on vs pre
RPL10P6	217.71	TRUE	3.47225	0.00051612	0.0126102	4.04748	condition on vs pre
KLRB1	136.174	TRUE	-3.47165	0.000517268	0.0126245	-2.75491	condition on vs pre
AC099509.1	31.9511	TRUE	-3.47103	0.000518466	0.01264	-5.55371	condition on vs pre
CCL4	219.067	TRUE	-3.46815	0.000524046	0.0127622	-1.94823	condition on vs pre
INMT	1122.84	TRUE	-3.4649	0.000530433	0.0129038	-2.43328	condition on vs pre
FBLN5	1668.29	TRUE	-3.46435	0.000531511	0.012916	-1.60518	condition on vs pre
PPARG	482.981	TRUE	-3.46076	0.000538654	0.0130755	-1.75365	condition on vs pre
CD68	4315.04	TRUE	-3.45999	0.0005402	0.0130988	-1.25634	condition on vs pre
MTND4P12	17556.5	TRUE	-3.45886	0.000542468	0.0131396	-2.1139	condition on vs pre
CHAD	607.66	TRUE	-3.45754	0.000545133	0.01319	-1.97838	condition on vs pre
CD4	1340.47	TRUE	-3.45631	0.000547623	0.013236	-1.33742	condition on vs pre
AL355987.4	605.613	TRUE	3.45501	0.000550266	0.0132856	1.73493	condition on vs pre
ETFB	5082.14	TRUE	-3.45288	0.000554628	0.0133677	-1.66764	condition on vs pre
HLA-DMB	1898.66	TRUE	-3.45277	0.000554857	0.0133677	-1.38128	condition on vs pre
AP006216.3	22.0754	TRUE	-3.44921	0.000562235	0.013531	-7.82457	condition on vs pre
PRG2	94.9043	TRUE	-3.44426	0.00057262	0.0137662	-5.51799	condition on vs pre
CCDC198	174.211	TRUE	-3.44383	0.000573542	0.0137736	-2.30314	condition on vs pre
SORBS2	1109.3	TRUE	-3.44231	0.000576777	0.0138365	-2.42867	condition on vs pre
SRRM3	1783.19	TRUE	3.43871	0.000584489	0.0140066	1.22044	condition on vs pre
DBN1	5881.62	TRUE	3.43816	0.000585687	0.0140203	1.12677	condition on vs pre
HSPB6	624.696	TRUE	-3.43693	0.000588357	0.0140598	-2.79826	condition on vs pre
ITPR2	2190.86	TRUE	-3.43682	0.000588588	0.0140598	-1.47311	condition on vs pre
CCL18	777.683	TRUE	-3.43645	0.0005894	0.0140643	-2.21584	condition on vs pre
CEBPA	2423.95	TRUE	-3.42478	0.000615291	0.0146665	-1.49095	condition on vs pre
ENO2	5195.4	TRUE	3.42403	0.000617002	0.0146917	1.43124	condition on vs pre
MFSD2A	1165.3	TRUE	-3.41937	0.000627665	0.014914	-2.44611	condition on vs pre
THBS1	28897.9	TRUE	3.41965	0.000627011	0.014914	1.2184	condition on vs pre
C17orf100	208.651	TRUE	-3.41608	0.000635301	0.0150795	-1.89738	condition on vs pre
ISG15	2286.95	TRUE	-3.41576	0.000636051	0.0150814	-1.7313	condition on vs pre
AD000671.1	113.087	TRUE	3.41386	0.000640485	0.0151705	6.11241	condition on vs pre
ACO1	1892.16	TRUE	-3.41116	0.000646861	0.0153054	-1.92912	condition on vs pre
MAB21L2	107.207	TRUE	-3.40833	0.000653629	0.0154493	-4.46087	condition on vs pre
PLCXD3	66.7539	TRUE	-3.40386	0.00066441	0.0156876	-3.75416	condition on vs pre
KMO	770.38	TRUE	-3.40272	0.000667194	0.0157368	-2.17132	condition on vs pre
MS4A6A	1846.86	TRUE	-3.40035	0.000673007	0.0158573	-1.53474	condition on vs pre
SCN4A	239.888	TRUE	-3.39991	0.000674092	0.0158662	-3.29416	condition on vs pre
CD5	176.441	TRUE	-3.3983	0.000678049	0.0159427	-2.26553	condition on vs pre
CR936218.2	50.6467	TRUE	-3.39763	0.000679716	0.0159652	-3.67902	condition on vs pre
KLRK1	516.105	TRUE	-3.39539	0.0006853	0.0160795	-1.86851	condition on vs pre
PKD1P5	732.555	TRUE	3.39327	0.000690625	0.0161876	1.56044	condition on vs pre
B4GALNT4	7253.03	TRUE	3.39194	0.000693994	0.0162496	1.26587	condition on vs pre
EME2	8147.5	TRUE	3.39132	0.000695565	0.0162694	1.22829	condition on vs pre
IL1RL1	150.618	TRUE	-3.39034	0.000698048	0.0163105	-3.53685	condition on vs pre
AL160269.1	97.5679	TRUE	-3.38853	0.000702682	0.0163847	-2.53952	condition on vs pre
CADM1	1285.65	TRUE	-3.38879	0.000702017	0.0163847	-1.73882	condition on vs pre
AGRN	18351.9	TRUE	3.38754	0.000705223	0.016427	1.46801	condition on vs pre
AC137056.1	73.9591	TRUE	-3.38625	0.000708558	0.0164875	-5.86743	condition on vs pre
CRYZL2P	593.93	TRUE	-3.3849	0.000712033	0.0165513	-1.72414	condition on vs pre
PCCA	1329.4	TRUE	-3.38342	0.000715898	0.0166239	-1.49651	condition on vs pre
APOL3	1652.8	TRUE	-3.38284	0.000717405	0.0166417	-1.38753	condition on vs pre
RASAL1	340.888	TRUE	-3.37824	0.000729513	0.0169052	-2.70283	condition on vs pre
SGK1	1914.67	TRUE	-3.37732	0.000731947	0.0169441	-1.18956	condition on vs pre
WDR90	7295.78	TRUE	3.37299	0.000743573	0.0171955	1.23248	condition on vs pre
SLC39A14	3447.08	TRUE	-3.37261	0.000744581	0.0172011	-1.60239	condition on vs pre
ZAP70	630.062	TRUE	-3.37135	0.000748019	0.0172628	-1.75254	condition on vs pre
ACSL4	933.56	TRUE	-3.37091	0.000749211	0.0172726	-1.31504	condition on vs pre
UNC5B	3636.65	TRUE	3.37016	0.000751251	0.0173019	1.23341	condition on vs pre
TSPAN8	2898.96	TRUE	-3.36691	0.000760142	0.0174887	-3.36552	condition on vs pre
AC005034.3	55.2467	TRUE	3.36504	0.000765319	0.0175898	7.4826	condition on vs pre
FTL	122394	TRUE	-3.36464	0.000766438	0.0175975	-1.1945	condition on vs pre
CACNG4	10093.4	TRUE	3.35819	0.000784555	0.0179941	1.54698	condition on vs pre
GJB2	908.348	TRUE	-3.35792	0.000785313	0.0179941	-4.32752	condition on vs pre
HLA-G	834.406	TRUE	-3.35318	0.000798884	0.0182865	-3.49699	condition on vs pre
CD1C	108.341	TRUE	-3.35215	0.000801869	0.0183212	-3.15679	condition on vs pre
CYP2D7	1460.08	TRUE	-3.35209	0.000802032	0.0183212	-1.74639	condition on vs pre
NRAP	38.2301	TRUE	-3.35014	0.000807708	0.0184321	-6.34396	condition on vs pre
LINC02027	22.0005	TRUE	-3.34863	0.000812124	0.0185141	-7.67308	condition on vs pre
PVT1	3034.17	TRUE	3.34659	0.00081813	0.0186321	1.67288	condition on vs pre
ENPP2	711.658	TRUE	-3.34476	0.000823551	0.0187366	-2.27644	condition on vs pre
CLTRN	87.7875	TRUE	-3.34384	0.000826272	0.0187606	-3.03848	condition on vs pre
ONECUT2	607.478	TRUE	-3.34405	0.000825658	0.0187606	-3.6812	condition on vs pre
FCER1G	1114.32	TRUE	-3.34292	0.000829009	0.0188037	-1.42698	condition on vs pre
PIGQ	9414.61	TRUE	3.34259	0.00083	0.0188072	1.41313	condition on vs pre
LDLRAD4	6832.72	TRUE	3.34203	0.000831684	0.0188264	1.81946	condition on vs pre
L3MBTL4	149.541	TRUE	-3.33966	0.000838806	0.0189685	-2.09139	condition on vs pre
THBS4	1257.46	TRUE	-3.33891	0.00084109	0.019001	-1.35109	condition on vs pre
LST1	589.365	TRUE	-3.33852	0.000842256	0.0190083	-1.85441	condition on vs pre
ANGPTL4	1057.92	TRUE	-3.33692	0.000847134	0.0190992	-1.97106	condition on vs pre
CYP3A43	150.705	TRUE	-3.33329	0.000858243	0.0193303	-2.54732	condition on vs pre
ONECUT1	31.7773	TRUE	-3.33223	0.000861527	0.0193848	-4.55713	condition on vs pre
IL6R	1258.23	TRUE	-3.33137	0.0008642	0.0194255	-1.68535	condition on vs pre
AP001453.1	216.786	TRUE	3.32933	0.000870543	0.0195485	1.80657	condition on vs pre
CYP21A2	1101.39	TRUE	-3.32524	0.000883429	0.0198181	-2.06601	condition on vs pre
RPS6P20	47.2482	TRUE	3.32346	0.000889073	0.0199248	6.54916	condition on vs pre
SOX12	5016.44	TRUE	3.32134	0.00089587	0.0200571	1.41135	condition on vs pre
FGR	588.941	TRUE	-3.32035	0.000899035	0.020108	-1.95568	condition on vs pre
DDX11L1	58.7351	TRUE	3.31965	0.000901302	0.0201329	6.28145	condition on vs pre
STBD1	1101.36	TRUE	-3.31945	0.000901943	0.0201329	-1.45173	condition on vs pre
ECHDC3	1327.16	TRUE	-3.31835	0.000905516	0.0201926	-1.2763	condition on vs pre
AL669918.1	837.282	TRUE	-3.31654	0.00091139	0.0203035	-1.28208	condition on vs pre
ECM1	2404.39	TRUE	-3.3159	0.000913497	0.0203303	-1.17408	condition on vs pre
ARID3C	44.9236	TRUE	-3.31522	0.000915721	0.0203596	-4.20194	condition on vs pre
DNASE1	6673.42	TRUE	3.31196	0.000926463	0.0205781	1.20111	condition on vs pre
PRKCB	186.021	TRUE	-3.31092	0.000929909	0.0206343	-2.10512	condition on vs pre
MMP11	15470.1	TRUE	3.30962	0.000934244	0.02071	1.83474	condition on vs pre
C4A	63035.4	TRUE	-3.30538	0.000948483	0.0210049	-1.96644	condition on vs pre
FAM126A	772.032	TRUE	-3.30479	0.000950461	0.0210244	-1.44563	condition on vs pre
IGHV3OR16-10	46.5854	TRUE	-3.30457	0.000951231	0.0210244	-7.79435	condition on vs pre
AC009093.3	406.488	TRUE	3.30063	0.000964689	0.0213009	3.37515	condition on vs pre
MFHAS1	576.134	TRUE	-3.29972	0.000967817	0.021349	-1.87248	condition on vs pre
ACADS	1946.4	TRUE	-3.29816	0.000973214	0.0214455	-1.84635	condition on vs pre
BICRA	2010.42	TRUE	3.2979	0.000974102	0.0214455	1.31563	condition on vs pre
UGP2	4978.97	TRUE	-3.29668	0.000978346	0.0215179	-1.5247	condition on vs pre
LCT	68.6614	TRUE	-3.29599	0.000980758	0.0215498	-4.55177	condition on vs pre
AMPD1	79.1494	TRUE	-3.29439	0.000986365	0.0216519	-5.44175	condition on vs pre
ACAD11	2081.8	TRUE	-3.29119	0.000997654	0.0218495	-1.3302	condition on vs pre
IGLV2-23	2125.59	TRUE	-3.29101	0.000998283	0.0218495	-2.65392	condition on vs pre
RCAN1	1097.05	TRUE	-3.29117	0.000997707	0.0218495	-1.45942	condition on vs pre
AC104809.2	48.5715	TRUE	-3.29055	0.000999925	0.0218641	-3.28548	condition on vs pre
SLC36A4	429.962	TRUE	-3.28807	0.00100876	0.0220358	-2.41777	condition on vs pre
CCDC68	172.383	TRUE	-3.28357	0.001025	0.0223688	-2.88666	condition on vs pre
SLC28A3	174.422	TRUE	-3.28284	0.00102766	0.0224052	-2.65072	condition on vs pre
HS1BP3-IT1	55.0879	TRUE	-3.28043	0.00103648	0.0225575	-4.14552	condition on vs pre
SPRY2	419.725	TRUE	-3.28039	0.00103665	0.0225575	-1.69279	condition on vs pre
RNF44	4552.8	TRUE	3.27943	0.00104015	0.0225995	1.4242	condition on vs pre
SLC24A2	113.272	TRUE	3.27931	0.0010406	0.0225995	6.0202	condition on vs pre
LINC00861	103.44	TRUE	-3.27689	0.00104956	0.0227721	-2.5391	condition on vs pre
TNFSF13B	351.249	TRUE	-3.27624	0.001052	0.0228032	-1.67163	condition on vs pre
GK	734.195	TRUE	-3.27494	0.00105686	0.0228864	-1.78151	condition on vs pre
PANK1	532.423	TRUE	-3.27445	0.00105868	0.0229038	-1.68395	condition on vs pre
AP001029.2	397.648	TRUE	3.26916	0.00107867	0.0232732	1.71827	condition on vs pre
GGH	1504.18	TRUE	-3.26911	0.00107886	0.0232732	-2.45257	condition on vs pre
GNAO1	1037.15	TRUE	-3.26937	0.00107786	0.0232732	-3.15661	condition on vs pre
CARD14	2300.49	TRUE	3.26811	0.0010827	0.0233225	1.23599	condition on vs pre
NAT1	7145.73	TRUE	-3.26797	0.00108322	0.0233225	-2.18182	condition on vs pre
TGM2	3190.76	TRUE	-3.26545	0.00109292	0.0235088	-1.55635	condition on vs pre
LINC00543	48.9401	TRUE	-3.26462	0.00109609	0.0235545	-3.72289	condition on vs pre
MAGEB17	95.2471	TRUE	3.26205	0.0011061	0.0237469	5.29649	condition on vs pre
LILRB3	378.123	TRUE	-3.26051	0.00111212	0.0238532	-1.52234	condition on vs pre
AL356488.2	43.2505	TRUE	3.25881	0.00111882	0.0239741	6.15397	condition on vs pre
CAND2	287.808	TRUE	-3.25713	0.00112544	0.024093	-2.70326	condition on vs pre
AC027796.3	43.2829	TRUE	3.25603	0.00112982	0.0241637	6.78603	condition on vs pre
AC021097.1	24.0416	TRUE	-3.25361	0.0011395	0.0243476	-7.35249	condition on vs pre
HPGD	608.508	TRUE	-3.25254	0.00114378	0.0244072	-2.19128	condition on vs pre
LINC01238	690.992	TRUE	3.25237	0.00114446	0.0244072	1.99188	condition on vs pre
LILRB5	626.131	TRUE	-3.25182	0.00114669	0.0244315	-1.59323	condition on vs pre
AC084125.2	1043.35	TRUE	3.2496	0.00115568	0.0245997	1.93153	condition on vs pre
TYROBP	2357.89	TRUE	-3.24632	0.00116908	0.0248616	-1.3659	condition on vs pre
INSM1	417.111	TRUE	3.24049	0.00119322	0.0253509	2.52856	condition on vs pre
PPP1R16B	439.559	TRUE	-3.23971	0.00119651	0.0253967	-1.64135	condition on vs pre
CCL13	59.6494	TRUE	-3.23353	0.00122271	0.0259284	-4.19003	condition on vs pre
IGKV1-6	173.97	TRUE	-3.23301	0.00122492	0.0259508	-4.0718	condition on vs pre
ATP5MF-PTCD1	293.863	TRUE	3.23231	0.00122795	0.0259904	1.71686	condition on vs pre
HSD17B4	6139.17	TRUE	-3.23187	0.00122984	0.0260059	-1.13237	condition on vs pre
LY96	219.47	TRUE	-3.22968	0.00123928	0.0261698	-1.77532	condition on vs pre
STEAP3	2709.14	TRUE	-3.22954	0.00123992	0.0261698	-1.2823	condition on vs pre
CU633967.1	699.314	TRUE	-3.22861	0.00124391	0.0262296	-1.39076	condition on vs pre
DCANP1	37.6942	TRUE	-3.22794	0.00124685	0.0262668	-6.05662	condition on vs pre
CCL3	293.184	TRUE	-3.22648	0.00125323	0.0263766	-1.62426	condition on vs pre
XDH	463.814	TRUE	-3.225	0.00125971	0.026488	-2.93041	condition on vs pre
KIF26B	1911.96	TRUE	3.2226	0.00127033	0.0266864	1.24486	condition on vs pre
SLC6A1	864.839	TRUE	-3.21786	0.00129149	0.0271057	-1.74731	condition on vs pre
IQCH-AS1	895.151	TRUE	3.2167	0.00129675	0.0271906	2.07175	condition on vs pre
ELMO1	575.905	TRUE	-3.2151	0.00130399	0.0273144	-1.51224	condition on vs pre
IGKV1-17	260.164	TRUE	-3.21486	0.00130508	0.0273144	-3.60938	condition on vs pre
IGKV3D-11	247.597	TRUE	-3.2135	0.00131129	0.0274188	-3.43777	condition on vs pre
ELF5	810.593	TRUE	-3.21075	0.00132389	0.0276566	-1.85046	condition on vs pre
ADHFE1	717.23	TRUE	-3.20837	0.00133491	0.0278608	-1.47345	condition on vs pre
LAMB3	553.071	TRUE	-3.20466	0.00135224	0.0281962	-1.79835	condition on vs pre
ZNF497	591.38	TRUE	3.20434	0.00135374	0.0282015	1.67768	condition on vs pre
GDF7	235.737	TRUE	-3.19941	0.00137711	0.0286352	-3.02494	condition on vs pre
SH3BGRL2	765.616	TRUE	-3.19943	0.00137699	0.0286352	-1.65014	condition on vs pre
RNF128	548.789	TRUE	-3.19797	0.00138397	0.0287512	-2.07104	condition on vs pre
RAB6C-AS1	474.001	TRUE	3.19656	0.00139076	0.0288391	1.84798	condition on vs pre
SCGN	476.392	TRUE	-3.19665	0.00139032	0.0288391	-4.05705	condition on vs pre
IGHV1-3	98.9504	TRUE	-3.19623	0.00139236	0.0288457	-3.03495	condition on vs pre
GREM2	208.688	TRUE	-3.19517	0.0013975	0.0289254	-4.51646	condition on vs pre
GLI3	2638.37	TRUE	3.19266	0.00140969	0.029151	1.58508	condition on vs pre
DAPP1	325.79	TRUE	-3.19126	0.00141652	0.0292653	-2.06839	condition on vs pre
ITGA9	720.448	TRUE	-3.18647	0.0014402	0.0297271	-1.80275	condition on vs pre
AC104966.1	31.9958	TRUE	-3.1835	0.00145504	0.0299809	-5.93711	condition on vs pre
LINC01303	54.6897	TRUE	-3.18348	0.00145516	0.0299809	-4.45039	condition on vs pre
AC242426.2	27.7068	TRUE	-3.18248	0.00146019	0.0300397	-5.20063	condition on vs pre
PLIN5	1896.92	TRUE	-3.18238	0.00146069	0.0300397	-2.57294	condition on vs pre
LINC02600	320.18	TRUE	3.17703	0.00148792	0.0305522	3.03156	condition on vs pre
NPNT	7903.76	TRUE	3.17695	0.00148833	0.0305522	1.1624	condition on vs pre
ARHGAP8	3092.91	TRUE	3.17547	0.00149592	0.0306636	1.6108	condition on vs pre
CLEC4GP1	24.2572	TRUE	-3.17536	0.00149648	0.0306636	-6.80008	condition on vs pre
ADAM1A	42.2388	TRUE	3.17496	0.00149858	0.0306786	7.8811	condition on vs pre
IFITM3	20147.7	TRUE	-3.17424	0.00150228	0.0307059	-1.21003	condition on vs pre
MFAP4	2846.15	TRUE	-3.17417	0.00150265	0.0307059	-2.23289	condition on vs pre
SCN9A	186.176	TRUE	-3.17154	0.00151634	0.0309575	-1.99596	condition on vs pre
PSMB8	3290.58	TRUE	-3.17123	0.00151793	0.0309618	-1.21803	condition on vs pre
SLC51A	636.362	TRUE	-3.17013	0.00152373	0.0310521	-2.20156	condition on vs pre
HSD17B3	40.2181	TRUE	-3.16788	0.00153556	0.0312648	-5.55247	condition on vs pre
VSIG4	553.818	TRUE	-3.16744	0.00153788	0.0312837	-2.19889	condition on vs pre
PPP1R1B	1064.82	TRUE	-3.16553	0.00154803	0.0314616	-2.39066	condition on vs pre
TMEM273	417.143	TRUE	-3.16361	0.00155823	0.0316405	-1.60842	condition on vs pre
FGF21	27.3488	TRUE	-3.15974	0.00157911	0.0320355	-6.08964	condition on vs pre
USP18	599.167	TRUE	-3.15936	0.00158118	0.0320485	-1.68398	condition on vs pre
PLAC8	168.086	TRUE	-3.15833	0.00158674	0.0321322	-2.06713	condition on vs pre
HK3	677.897	TRUE	-3.15698	0.0015941	0.0322523	-2.68779	condition on vs pre
MPC1	2242.72	TRUE	-3.15573	0.00160099	0.0323626	-1.88569	condition on vs pre
BCL2A1	108.778	TRUE	-3.15412	0.00160981	0.0324824	-2.64927	condition on vs pre
GALM	1512.61	TRUE	-3.15424	0.00160916	0.0324824	-1.16715	condition on vs pre
SERPINA6	4468.18	TRUE	-3.15292	0.00161648	0.0325876	-5.83929	condition on vs pre
GLRX	1446.12	TRUE	-3.15004	0.00163248	0.0328612	-1.55697	condition on vs pre
SHROOM1	2835.42	TRUE	-3.14995	0.00163297	0.0328612	-1.50758	condition on vs pre
ADAMTSL1	257.317	TRUE	-3.14955	0.00163522	0.0328769	-2.16916	condition on vs pre
PROX1-AS1	80.5921	TRUE	-3.14696	0.00164979	0.0331402	-2.61456	condition on vs pre
CD79B	163.556	TRUE	-3.14587	0.00165596	0.0331789	-2.36382	condition on vs pre
DPP4	549.5	TRUE	-3.14632	0.00165338	0.0331789	-2.93771	condition on vs pre
TNK2	9082.05	TRUE	3.14583	0.00165614	0.0331789	1.34469	condition on vs pre
AC127496.6	35.9866	TRUE	-3.14516	0.00165996	0.0332258	-6.68165	condition on vs pre
PTH1R	336.617	TRUE	-3.14464	0.0016629	0.0332551	-1.87674	condition on vs pre
N4BP3	4424.76	TRUE	3.14099	0.00168375	0.0336421	1.39767	condition on vs pre
TLR2	563.278	TRUE	-3.13987	0.0016902	0.033741	-1.54738	condition on vs pre
MRAS	1356.83	TRUE	-3.13953	0.00169221	0.033751	-1.70427	condition on vs pre
BMP5	80.1044	TRUE	-3.13898	0.00169538	0.0337843	-3.77476	condition on vs pre
AC026403.1	389.9	TRUE	3.13727	0.00170531	0.0339521	12.0579	condition on vs pre
BEX3	1596.45	TRUE	-3.13694	0.00170721	0.0339598	-1.32507	condition on vs pre
SCHIP1	419.872	TRUE	-3.13461	0.00172081	0.0342002	-2.12517	condition on vs pre
ENTPD2	349.597	TRUE	3.13285	0.0017312	0.0343762	2.06323	condition on vs pre
PLCD4	562.564	TRUE	3.12704	0.00176575	0.0350313	1.62603	condition on vs pre
ADAMTSL4	886.317	TRUE	-3.12613	0.00177122	0.035109	-1.56536	condition on vs pre
SASH3	503.943	TRUE	-3.12553	0.00177487	0.0351503	-1.33916	condition on vs pre
DMD	649.498	TRUE	-3.12422	0.00178279	0.035276	-1.83761	condition on vs pre
NXPH3	794.305	TRUE	3.12138	0.00180007	0.0355866	1.53106	condition on vs pre
ACSL5	1349.32	TRUE	-3.12056	0.00180505	0.0356536	-2.40096	condition on vs pre
PLPP4	284.745	TRUE	3.11729	0.00182524	0.0360208	1.87305	condition on vs pre
CYP26A1	335.481	TRUE	-3.11443	0.001843	0.0363393	-3.09975	condition on vs pre
ZEB2	2092.42	TRUE	-3.11366	0.0018478	0.0364021	-1.40978	condition on vs pre
TNFSF18	53.9343	TRUE	-3.11334	0.00184981	0.0364098	-4.43903	condition on vs pre
IGHV1-69D	579.894	TRUE	-3.11224	0.00185671	0.0365136	-2.64872	condition on vs pre
SLC41A2	524.385	TRUE	-3.1116	0.00186079	0.0365619	-2.11587	condition on vs pre
DDC	34689.1	TRUE	-3.11134	0.00186243	0.0365622	-2.92906	condition on vs pre
CARD16	330.441	TRUE	-3.11077	0.00186597	0.0365998	-1.73486	condition on vs pre
SCML4	185.297	TRUE	-3.11048	0.00186781	0.0366039	-2.50973	condition on vs pre
IGLV3-21	453.506	TRUE	-3.10964	0.00187318	0.0366771	-2.97379	condition on vs pre
CCR7	162.769	TRUE	-3.10842	0.00188092	0.0367967	-2.21514	condition on vs pre
MALL	776.018	TRUE	-3.10743	0.00188725	0.0368562	-1.2313	condition on vs pre
MUC20	786.486	TRUE	-3.10746	0.001887	0.0368562	-1.27605	condition on vs pre
FBXO25	1248.86	TRUE	-3.10613	0.00189553	0.0369586	-1.39744	condition on vs pre
IL10RA	996.629	TRUE	-3.10609	0.00189577	0.0369586	-1.45312	condition on vs pre
GGT2	29.3039	TRUE	-3.10476	0.00190433	0.0370931	-5.31153	condition on vs pre
ADORA2BP1	25.7584	TRUE	-3.10444	0.00190636	0.0371007	-5.37896	condition on vs pre
HLA-F	3688.13	TRUE	-3.1012	0.00192738	0.0374772	-1.07582	condition on vs pre
AC127459.3	27.0363	TRUE	-3.0989	0.00194242	0.0376393	-6.44412	condition on vs pre
CXCL6	83.4251	TRUE	-3.09897	0.00194192	0.0376393	-4.36786	condition on vs pre
PIF1	687.712	TRUE	3.09902	0.00194165	0.0376393	1.68965	condition on vs pre
TENM1	393.257	TRUE	-3.09963	0.00193764	0.0376393	-2.37601	condition on vs pre
LYN	960.45	TRUE	-3.09714	0.00195399	0.0378311	-1.55096	condition on vs pre
LCK	296.801	TRUE	-3.09317	0.00198027	0.0383069	-1.55616	condition on vs pre
CACNA1F	56.1977	TRUE	3.09223	0.00198661	0.0383754	5.25034	condition on vs pre
SIK2	2272.18	TRUE	-3.09213	0.00198723	0.0383754	-1.13673	condition on vs pre
GALNT14	149.154	TRUE	3.09145	0.00199179	0.0384304	3.15906	condition on vs pre
AC090227.1	44.38	TRUE	-3.09086	0.0019958	0.0384748	-7.49939	condition on vs pre
PLSCR4	907.308	TRUE	-3.09008	0.00200104	0.0385097	-1.27944	condition on vs pre
RELN	145.294	TRUE	-3.09018	0.00200039	0.0385097	-3.23261	condition on vs pre
CD7	136.667	TRUE	-3.08872	0.0020102	0.0386356	-2.20002	condition on vs pre
GIPC2	116.308	TRUE	-3.0886	0.00201102	0.0386356	-4.09109	condition on vs pre
D2HGDH	7388.6	TRUE	3.08769	0.0020172	0.0387212	1.48511	condition on vs pre
LCP1	2952.37	TRUE	-3.08158	0.00205902	0.0394903	-1.24039	condition on vs pre
AC008403.1	1495.26	TRUE	3.07863	0.00207955	0.0398501	1.13561	condition on vs pre
ENPP4	607.107	TRUE	-3.07527	0.00210311	0.0402671	-1.47159	condition on vs pre
NPR1	719.073	TRUE	-3.07476	0.00210675	0.0403026	-1.42935	condition on vs pre
UBALD1	3036.34	TRUE	3.07368	0.00211434	0.0404134	1.22144	condition on vs pre
CSRP2	668.644	TRUE	-3.073	0.00211917	0.0404712	-1.26576	condition on vs pre
AL135905.2	3126.8	TRUE	-3.07232	0.00212403	0.0405297	-1.27716	condition on vs pre
HLA-DQA2	769.005	TRUE	-3.06999	0.00214067	0.0408126	-1.28667	condition on vs pre
DTX1	374.286	TRUE	-3.06956	0.00214377	0.0408126	-2.2391	condition on vs pre
FASN	104896	TRUE	3.06948	0.0021443	0.0408126	1.54754	condition on vs pre
PLCG2	838.142	TRUE	-3.06666	0.00216464	0.0411648	-1.6257	condition on vs pre
IGKV1-33	403.985	TRUE	-3.06606	0.002169	0.0412129	-3.08541	condition on vs pre
CASZ1	3880.66	TRUE	3.06464	0.00217936	0.0413746	1.56932	condition on vs pre
FAM49A	366.557	TRUE	-3.0641	0.00218327	0.041414	-1.59852	condition on vs pre
SNHG28	49.6843	TRUE	-3.05986	0.00221442	0.041911	-7.17682	condition on vs pre
ZNF831	56.464	TRUE	-3.05977	0.00221507	0.041911	-3.25008	condition on vs pre
ZSWIM8-AS1	53.3927	TRUE	3.06001	0.00221327	0.041911	8.23089	condition on vs pre
GATA3	18490.8	TRUE	3.05852	0.00222436	0.0420515	1.00156	condition on vs pre
AC006441.3	247.531	TRUE	-3.05494	0.00225108	0.0425207	-9.18896	condition on vs pre
CHI3L1	917.699	TRUE	-3.0523	0.00227098	0.0428606	-2.14749	condition on vs pre
MT1L	91.6344	TRUE	-3.05192	0.00227383	0.0428785	-2.75093	condition on vs pre
RAB11FIP3	10068.1	TRUE	3.05078	0.00228251	0.0430061	1.07388	condition on vs pre
AC130343.1	35.7405	TRUE	-3.04842	0.00230052	0.0432866	-6.38698	condition on vs pre
GDPD5	1023.22	TRUE	-3.04832	0.00230125	0.0432866	-1.20883	condition on vs pre
PECR	928.08	TRUE	-3.04725	0.00230945	0.0434045	-1.67312	condition on vs pre
LINC00265	791.032	TRUE	3.04639	0.00231609	0.043493	1.20113	condition on vs pre
DLL4	875.174	TRUE	3.04527	0.00232468	0.0436179	1.17303	condition on vs pre
BMP2	181.964	TRUE	-3.04463	0.00232969	0.0436754	-2.16371	condition on vs pre
TRERF1	1908.11	TRUE	3.04204	0.00234977	0.0440152	1.17145	condition on vs pre
ACAP3	10755.2	TRUE	3.04092	0.00235859	0.0441435	1.01043	condition on vs pre
ABAT	5594.42	TRUE	-3.0392	0.00237206	0.0443187	-1.30533	condition on vs pre
AC106886.5	5003.51	TRUE	3.03872	0.00237584	0.0443187	1.55998	condition on vs pre
AOAH	334.203	TRUE	-3.03927	0.00237151	0.0443187	-1.71786	condition on vs pre
NPL	1121.66	TRUE	-3.0389	0.00237441	0.0443187	-1.42486	condition on vs pre
AC009065.3	29.2832	TRUE	3.03576	0.00239926	0.0447186	6.62407	condition on vs pre
EML2-AS1	50.8848	TRUE	-3.03349	0.00241743	0.04502	-6.21392	condition on vs pre
PSMB9	1375.25	TRUE	-3.03081	0.00243897	0.0453835	-1.32983	condition on vs pre
FBXO46	2219.33	TRUE	3.02912	0.00245264	0.0456001	1.37726	condition on vs pre
CYTIP	313.67	TRUE	-3.02829	0.00245939	0.0456878	-2.05151	condition on vs pre
GSTO1	4066.49	TRUE	-3.02742	0.00246651	0.0457822	-1.42762	condition on vs pre
SBK1	3001.12	TRUE	3.02623	0.0024762	0.0459241	1.10104	condition on vs pre
AMER3	120.103	TRUE	3.02481	0.00248791	0.0461032	3.82016	condition on vs pre
CORIN	269.482	TRUE	3.02353	0.0024984	0.0461997	1.7358	condition on vs pre
FGD2	528.168	TRUE	-3.02343	0.00249928	0.0461997	-1.29406	condition on vs pre
LINC02428	67.2962	TRUE	-3.02385	0.00249583	0.0461997	-4.2206	condition on vs pre
GRHPR	5221.1	TRUE	-3.02258	0.00250631	0.0462536	-1.30189	condition on vs pre
HCP5	825.251	TRUE	-3.0227	0.00250534	0.0462536	-1.20783	condition on vs pre
RRAD	266.951	TRUE	-3.02219	0.00250951	0.0462745	-2.25758	condition on vs pre
KLHL29	327.924	TRUE	-3.02009	0.002527	0.0465209	-1.45562	condition on vs pre
STX1A	3011.47	TRUE	3.02015	0.00252651	0.0465209	1.0652	condition on vs pre
EVPLL	24.5373	TRUE	-3.01976	0.00252973	0.0465329	-5.64657	condition on vs pre
MALRD1	1020.1	TRUE	3.01912	0.00253507	0.0465931	2.79834	condition on vs pre
CLIP4	633.945	TRUE	-3.01826	0.00254229	0.0466119	-1.7121	condition on vs pre
HSPD1P6	71.6425	TRUE	3.01844	0.0025408	0.0466119	3.91324	condition on vs pre
MIR4697HG	363.392	TRUE	3.01826	0.00254232	0.0466119	1.48768	condition on vs pre
STK11IP	2485.01	TRUE	3.01631	0.00255869	0.0468738	1.65885	condition on vs pre
AC026362.1	748.288	TRUE	3.01275	0.00258896	0.0473898	1.48823	condition on vs pre
NOTCH3	9108.64	TRUE	3.01213	0.0025942	0.047447	1.11499	condition on vs pre
SLC5A9	162.292	TRUE	-3.01159	0.00259883	0.0474931	-1.91949	condition on vs pre
CTXND1	165.583	TRUE	-3.00969	0.00261513	0.0477521	-2.22686	condition on vs pre
HLA-DRB1	6544.8	TRUE	-3.00919	0.00261945	0.0477922	-1.03321	condition on vs pre
RASGEF1B	530.48	TRUE	-3.00763	0.00263295	0.0479995	-1.4966	condition on vs pre
IGLV4-69	454.451	TRUE	-3.00611	0.00264613	0.0481617	-2.5185	condition on vs pre
TMEM220-AS1	64.1478	TRUE	-3.00618	0.00264555	0.0481617	-3.67692	condition on vs pre
SIT1	79.5121	TRUE	-3.00239	0.00267866	0.0487142	-2.64137	condition on vs pre
SERPINE1	1937.93	TRUE	-3.00042	0.00269609	0.0489917	-1.05187	condition on vs pre
FOXI1	294.832	TRUE	2.99962	0.00270319	0.0490107	1.65761	condition on vs pre
PCDH17	461.03	TRUE	-2.99996	0.00270014	0.0490107	-1.5672	condition on vs pre
PCTP	1176.28	TRUE	-2.99956	0.00270368	0.0490107	-1.48886	condition on vs pre
EPHA3	756.614	TRUE	-2.998	0.00271755	0.0492225	-1.82394	condition on vs pre
CA2	674.441	TRUE	-2.99761	0.00272104	0.049246	-1.51722	condition on vs pre
CPVL	673.333	TRUE	-2.99546	0.00274033	0.0495305	-1.22914	condition on vs pre
LGALS2	69.7102	TRUE	-2.99536	0.00274117	0.0495305	-2.73179	condition on vs pre
AC010300.1	221.133	TRUE	2.99414	0.00275221	0.0496103	3.78542	condition on vs pre
DOK2	416.933	TRUE	-2.99453	0.00274869	0.0496103	-1.57192	condition on vs pre
ETNK2	1611.02	TRUE	-2.99428	0.00275092	0.0496103	-1.06867	condition on vs pre
SERPINE2	1333.82	TRUE	-2.99208	0.0027708	0.0499055	-1.15765	condition on vs pre
ANO1-AS1	56.3561	TRUE	2.9914	0.00277705	0.049978	5.81595	condition on vs pre
ATP5PF	2782.69	FALSE	-2.99088	0.00278179	0.0500232	-1.35333	condition on vs pre
GYPC	1034.06	FALSE	-2.98769	0.00281094	0.050507	-1.15362	condition on vs pre
AC124947.2	154.778	FALSE	2.98668	0.00282021	0.0505984	3.60871	condition on vs pre
GRM4	1244.47	FALSE	2.98665	0.00282053	0.0505984	1.54304	condition on vs pre
GPC3	622.266	FALSE	-2.98536	0.00283247	0.0507721	-2.08945	condition on vs pre
ADGRE3	23.5535	FALSE	-2.98503	0.0028355	0.0507859	-6.88911	condition on vs pre
IGLV5-45	54.3203	FALSE	-2.98391	0.00284589	0.0509315	-4.21957	condition on vs pre
SETD1A	3131.98	FALSE	2.98176	0.00286595	0.0512497	1.3408	condition on vs pre
CD79A	211.109	FALSE	-2.97777	0.00290352	0.0518803	-2.10304	condition on vs pre
PIP5K1C	3922.55	FALSE	2.97631	0.00291744	0.0520875	1.01607	condition on vs pre
LINC02352	62.9263	FALSE	-2.97349	0.00294438	0.0525268	-3.36306	condition on vs pre
CRAMP1	5927.67	FALSE	2.97197	0.00295891	0.0527442	1.05369	condition on vs pre
SGSM2	9110.35	FALSE	2.96892	0.00298848	0.0532291	1.0667	condition on vs pre
NRGN	349.401	FALSE	-2.96846	0.00299293	0.0532661	-1.87944	condition on vs pre
ITGB2	2458.61	FALSE	-2.9679	0.0029984	0.0533212	-1.1736	condition on vs pre
STOX2	134.958	FALSE	-2.96764	0.00300099	0.053325	-2.51409	condition on vs pre
GBP4	1447.69	FALSE	-2.96612	0.00301582	0.0535463	-1.73602	condition on vs pre
GTF2IP13	1792.66	FALSE	2.96365	0.00304017	0.053936	1.39977	condition on vs pre
GHR	1499.6	FALSE	-2.95617	0.00311486	0.055174	-1.08639	condition on vs pre
LINC01835	204.888	FALSE	2.95624	0.00311414	0.055174	3.43381	condition on vs pre
LINC02604	1472.72	FALSE	2.95406	0.00313628	0.0555097	1.34991	condition on vs pre
PGF	1023.51	FALSE	2.95322	0.00314474	0.0556156	1.25543	condition on vs pre
TNXA	70.1602	FALSE	-2.95017	0.00317595	0.0561235	-4.12428	condition on vs pre
TFF1	1926.25	FALSE	-2.94764	0.00320207	0.0565405	-1.91314	condition on vs pre
SACS	1026.9	FALSE	-2.94662	0.00321266	0.056683	-2.06707	condition on vs pre
BMS1P10	129.941	FALSE	-2.94577	0.00322148	0.056794	-2.01003	condition on vs pre
FBXL16	5488.81	FALSE	2.94342	0.00324605	0.0571602	1.36388	condition on vs pre
SLC1A2	627.808	FALSE	-2.9433	0.00324734	0.0571602	-1.29063	condition on vs pre
S100A12	28.4412	FALSE	-2.94305	0.00325	0.0571623	-6.60302	condition on vs pre
LGALS9	1596.74	FALSE	-2.94176	0.0032635	0.0573549	-1.07636	condition on vs pre
TIAM1	406.557	FALSE	-2.94096	0.00327193	0.0574582	-1.54187	condition on vs pre
HAPLN4	153.924	FALSE	-2.93928	0.00328978	0.0577265	-3.58525	condition on vs pre
ECHDC1	1108.66	FALSE	-2.93811	0.0033022	0.0578993	-1.70801	condition on vs pre
AC020917.4	331.303	FALSE	2.93582	0.00332662	0.058282	1.824	condition on vs pre
BOD1L1	2391.72	FALSE	2.93493	0.00333624	0.058405	1.18101	condition on vs pre
AC126283.2	33.0007	FALSE	-2.93396	0.00334666	0.0584962	-8.35915	condition on vs pre
HLA-DOA	972.729	FALSE	-2.93404	0.00334577	0.0584962	-1.36769	condition on vs pre
SLC22A3	179.543	FALSE	-2.93354	0.00335123	0.0585306	-3.32298	condition on vs pre
ABCA10	567.258	FALSE	-2.93293	0.00335781	0.0586001	-1.94979	condition on vs pre
CYP3A7	106.529	FALSE	-2.93246	0.00336291	0.0586436	-3.99361	condition on vs pre
CHD3	11645.9	FALSE	2.93037	0.00338563	0.0589483	1.09228	condition on vs pre
CTSB	28884.6	FALSE	-2.93038	0.00338543	0.0589483	-1.10567	condition on vs pre
BOK	2798.99	FALSE	-2.92969	0.00339302	0.0590311	-1.5569	condition on vs pre
BRINP3	2249.53	FALSE	-2.92851	0.00340587	0.0591724	-5.61016	condition on vs pre
TMSB15B-AS1	26.4306	FALSE	2.92846	0.0034064	0.0591724	5.08866	condition on vs pre
CASKIN1	718.905	FALSE	2.92784	0.00341324	0.0592455	2.09852	condition on vs pre
ARMH4	274.402	FALSE	-2.92631	0.00343009	0.0594461	-1.8776	condition on vs pre
CD38	284.752	FALSE	-2.92639	0.00342925	0.0594461	-2.9694	condition on vs pre
PALM3	423.572	FALSE	-2.92604	0.00343302	0.059451	-2.4383	condition on vs pre
AC122688.3	284.444	FALSE	2.92549	0.00343917	0.0595116	1.72762	condition on vs pre
VNN3	87.424	FALSE	-2.9236	0.00346014	0.0598285	-2.70309	condition on vs pre
HIBADH	2440.12	FALSE	-2.92261	0.00347107	0.0599713	-1.04072	condition on vs pre
PARP6	5864.65	FALSE	2.92177	0.00348045	0.0600872	1.22807	condition on vs pre
ADRA2C	734.376	FALSE	2.92116	0.00348734	0.0601138	1.18839	condition on vs pre
GPLD1	374.76	FALSE	-2.92122	0.00348668	0.0601138	-1.66291	condition on vs pre
CYP26B1	275.116	FALSE	-2.91918	0.00350954	0.0604501	-2.05795	condition on vs pre
AC118344.2	609.838	FALSE	2.91696	0.00353459	0.0608349	1.65978	condition on vs pre
SESN3	889.586	FALSE	-2.91585	0.00354725	0.0610063	-1.17599	condition on vs pre
HLA-DRB5	1896.97	FALSE	-2.91447	0.0035629	0.0612285	-1.10439	condition on vs pre
ECHS1	7987.9	FALSE	-2.91288	0.00358107	0.0613977	-1.05835	condition on vs pre
IGHV4-28	32.6069	FALSE	-2.91266	0.00358367	0.0613977	-4.7203	condition on vs pre
ISG20	920.682	FALSE	-2.91329	0.00357638	0.0613977	-1.44123	condition on vs pre
LAMA5-AS1	90.2019	FALSE	-2.9129	0.00358087	0.0613977	-3.14704	condition on vs pre
AL109827.1	51.4776	FALSE	-2.91165	0.00359531	0.0615501	-5.71449	condition on vs pre
NPRL3	5025.94	FALSE	2.91052	0.00360831	0.0617257	0.954498	condition on vs pre
SLC29A4	490.485	FALSE	-2.90861	0.00363036	0.0620086	-1.63384	condition on vs pre
SLX1B-SULT1A4	3262.65	FALSE	2.90866	0.00362985	0.0620086	1.63424	condition on vs pre
GATD1	6973.49	FALSE	2.90396	0.0036848	0.0628429	1.22459	condition on vs pre
PTK7	4497.83	FALSE	2.90406	0.00368357	0.0628429	1.32561	condition on vs pre
AC129507.1	90.0619	FALSE	-2.89757	0.00376064	0.0640342	-2.79663	condition on vs pre
ACKR1	301.261	FALSE	-2.89736	0.0037632	0.0640342	-2.9013	condition on vs pre
BID	1417.31	FALSE	-2.8976	0.00376027	0.0640342	-1.16122	condition on vs pre
MPO	45.0502	FALSE	-2.89683	0.00376956	0.064094	-4.57081	condition on vs pre
AC037198.2	421.767	FALSE	2.89551	0.00378538	0.0643142	3.42336	condition on vs pre
LINC00431	194.606	FALSE	-2.8929	0.00381702	0.0648028	-2.88675	condition on vs pre
ASPA	439.017	FALSE	-2.89214	0.00382621	0.064861	-2.31992	condition on vs pre
IGKV2-30	527.237	FALSE	-2.89223	0.00382522	0.064861	-2.24864	condition on vs pre
OLFML2A	2301.26	FALSE	2.89151	0.00383395	0.0649432	1.00416	condition on vs pre
OLFM2	1034.08	FALSE	-2.89084	0.00384214	0.0650328	-2.34678	condition on vs pre
CD209	302.16	FALSE	-2.88676	0.00389226	0.0657822	-1.62799	condition on vs pre
SDK2	109.419	FALSE	2.88687	0.00389099	0.0657822	4.24016	condition on vs pre
AL162231.1	114.088	FALSE	-2.88615	0.00389981	0.0657934	-2.67166	condition on vs pre
LRAT	164.682	FALSE	-2.886	0.00390171	0.0657934	-2.42266	condition on vs pre
MCM3AP-AS1	386.505	FALSE	2.88608	0.00390078	0.0657934	1.39706	condition on vs pre
IGSF3	3660.4	FALSE	2.88566	0.00390595	0.0658155	1.31282	condition on vs pre
GPC2	585.609	FALSE	2.88456	0.00391955	0.0659953	1.30242	condition on vs pre
SOD1	10550.5	FALSE	-2.88357	0.00393193	0.0661541	-1.42741	condition on vs pre
EVI2B	477.02	FALSE	-2.88298	0.00393935	0.0661939	-1.52963	condition on vs pre
RILP	457.235	FALSE	-2.88291	0.00394019	0.0661939	-1.5217	condition on vs pre
ST3GAL6	651.254	FALSE	-2.88064	0.00396868	0.0666228	-1.37475	condition on vs pre
C19orf54	1206.24	FALSE	2.87955	0.00398249	0.0667438	1.55244	condition on vs pre
CKMT1B	924.541	FALSE	2.87969	0.00398061	0.0667438	2.88995	condition on vs pre
NBEAL2	14025.6	FALSE	2.87936	0.00398479	0.0667438	0.977479	condition on vs pre
GOLGA8M	108.42	FALSE	-2.87844	0.00399641	0.0668886	-2.38809	condition on vs pre
CYP4V2	2134.8	FALSE	-2.87583	0.00402972	0.0672957	-1.41041	condition on vs pre
HMCN1	1301.37	FALSE	-2.87588	0.00402902	0.0672957	-1.16861	condition on vs pre
SH2B1	6252.15	FALSE	2.87597	0.0040279	0.0672957	1.06371	condition on vs pre
CYP2B7P	953.759	FALSE	-2.8752	0.00403771	0.0673429	-2.29483	condition on vs pre
ST8SIA5	87.8549	FALSE	2.87514	0.00403854	0.0673429	2.82598	condition on vs pre
ARSE	441.948	FALSE	-2.87416	0.00405106	0.0675017	-2.79969	condition on vs pre
CFAP44	1647.17	FALSE	2.87378	0.00405597	0.0675181	1.12889	condition on vs pre
MEST	2259.45	FALSE	-2.87361	0.00405805	0.0675181	-1.34391	condition on vs pre
ASB2	121.357	FALSE	-2.87276	0.00406903	0.0676507	-2.33629	condition on vs pre
COL14A1	3298.81	FALSE	-2.87157	0.00408433	0.0678549	-1.28061	condition on vs pre
PBLD	1765.08	FALSE	-2.87093	0.0040926	0.067942	-1.61346	condition on vs pre
EMCN	676.82	FALSE	-2.87069	0.0040958	0.0679449	-1.47162	condition on vs pre
AL109659.2	36.4461	FALSE	2.87028	0.00410115	0.0679834	5.84523	condition on vs pre
MOCS1	932.354	FALSE	-2.86998	0.00410497	0.0679967	-1.16703	condition on vs pre
ACOT1	619.113	FALSE	-2.8696	0.0041099	0.0680282	-1.41477	condition on vs pre
AC012313.9	67.2127	FALSE	-2.86891	0.00411885	0.06808	-2.44577	condition on vs pre
C1orf159	2882.03	FALSE	2.86889	0.00411909	0.06808	1.21826	condition on vs pre
SIPA1L3	5576.13	FALSE	2.86714	0.00414204	0.0684091	0.954761	condition on vs pre
CREBBP	6275.04	FALSE	2.86668	0.00414805	0.0684581	1.08779	condition on vs pre
AC105020.4	30.1687	FALSE	-2.86556	0.00416275	0.0686431	-6.65427	condition on vs pre
NCKAP1L	1137.07	FALSE	-2.86536	0.00416537	0.0686431	-1.48322	condition on vs pre
AC023590.1	30.765	FALSE	2.86442	0.00417767	0.0687954	6.16117	condition on vs pre
CD69	124.485	FALSE	-2.86357	0.00418901	0.0688308	-2.35695	condition on vs pre
MGST2	2046.87	FALSE	-2.86371	0.00418706	0.0688308	-1.63804	condition on vs pre
NR3C1	2295.47	FALSE	-2.86359	0.00418873	0.0688308	-1.45229	condition on vs pre
CRYAB	557.354	FALSE	-2.86291	0.00419769	0.0689231	-2.08271	condition on vs pre
PLA2G7	434.113	FALSE	-2.86246	0.00420371	0.0689716	-1.39299	condition on vs pre
HOXC8	333.924	FALSE	2.86174	0.00421324	0.0690775	1.78742	condition on vs pre
LINC00930	140.463	FALSE	2.85899	0.00424997	0.0696289	2.17365	condition on vs pre
CD8B2	31.3772	FALSE	2.85441	0.00431171	0.0705376	6.31036	condition on vs pre
HSDL2	2210.85	FALSE	-2.8546	0.00430907	0.0705376	-1.1353	condition on vs pre
AC141586.1	412.599	FALSE	2.85369	0.00432145	0.0706454	1.41303	condition on vs pre
FZD5	412.105	FALSE	-2.85319	0.00432829	0.0706978	-1.33637	condition on vs pre
NAMPT	2896.84	FALSE	-2.85299	0.00433094	0.0706978	-1.28147	condition on vs pre
NLRP2	960.415	FALSE	2.85182	0.00434694	0.0709074	1.54469	condition on vs pre
PKD1	15953.4	FALSE	2.84822	0.00439649	0.0716637	1.04862	condition on vs pre
SERPINB8	329.349	FALSE	-2.84776	0.00440286	0.0717156	-1.38785	condition on vs pre
HCST	241.23	FALSE	-2.84563	0.00443231	0.0721431	-2.01377	condition on vs pre
CD244	62.9207	FALSE	-2.84362	0.00446044	0.0725483	-3.00339	condition on vs pre
NPR3	344.924	FALSE	-2.84029	0.00450731	0.0732576	-2.28984	condition on vs pre
IL18RAP	80.5092	FALSE	-2.83839	0.00453414	0.0736404	-2.41155	condition on vs pre
SMCO4	607.934	FALSE	-2.8379	0.00454118	0.073679	-1.18998	condition on vs pre
TSC2	11594.3	FALSE	2.83776	0.00454307	0.073679	1.05109	condition on vs pre
PXDC1	1506.07	FALSE	-2.83641	0.00456234	0.0739381	-1.55565	condition on vs pre
KIAA1522	8915.85	FALSE	2.83361	0.00460261	0.074537	1.20998	condition on vs pre
SLC39A8	840.19	FALSE	-2.83292	0.00461255	0.0746442	-1.13949	condition on vs pre
MS4A2	296.246	FALSE	2.83261	0.00461696	0.0746618	1.80302	condition on vs pre
OXT	40.2285	FALSE	-2.8309	0.00464166	0.0750074	-3.48147	condition on vs pre
GSPT2	189.953	FALSE	-2.8275	0.00469132	0.0757554	-1.95364	condition on vs pre
UGT1A9	418.111	FALSE	-2.82645	0.00470672	0.0759495	-10.8845	condition on vs pre
CCDC183	457.919	FALSE	2.82491	0.00472934	0.0762598	1.53944	condition on vs pre
SLC9A9	203.939	FALSE	-2.82452	0.00473515	0.0762987	-1.70193	condition on vs pre
IGSF6	1045.46	FALSE	-2.82378	0.00474606	0.0764198	-1.70565	condition on vs pre
IGLV2-14	2967.82	FALSE	-2.822	0.00477253	0.0767909	-2.27034	condition on vs pre
KIAA0556	3872.26	FALSE	2.8217	0.00477693	0.0768067	1.01366	condition on vs pre
MPP1	966.5	FALSE	-2.82105	0.00478672	0.0769091	-1.15969	condition on vs pre
CEACAM1	569.141	FALSE	-2.82055	0.0047942	0.0769743	-1.86672	condition on vs pre
AXIN1	7116.78	FALSE	2.82011	0.00480071	0.0770238	0.94893	condition on vs pre
IGKV5-2	90.0704	FALSE	-2.81951	0.00480976	0.0771114	-3.24445	condition on vs pre
PTPRH	484.08	FALSE	-2.81915	0.00481511	0.0771114	-2.69966	condition on vs pre
THEMIS2	665.094	FALSE	-2.81906	0.00481646	0.0771114	-1.31621	condition on vs pre
GIMAP1-GIMAP5	496.747	FALSE	-2.81683	0.00485004	0.0773186	-1.60609	condition on vs pre
LIPE	1293.55	FALSE	-2.81702	0.00484718	0.0773186	-1.93844	condition on vs pre
NPAS3	102.048	FALSE	2.81786	0.00483448	0.0773186	4.02584	condition on vs pre
PTPN22	154.022	FALSE	-2.81735	0.00484217	0.0773186	-2.16921	condition on vs pre
SOWAHA	281.489	FALSE	-2.81712	0.00484561	0.0773186	-2.70897	condition on vs pre
ZNF503-AS2	99.8636	FALSE	-2.81708	0.00484632	0.0773186	-2.20104	condition on vs pre
NKAIN1	1771.12	FALSE	2.81644	0.00485587	0.0773566	2.37598	condition on vs pre
GSE1	13502.2	FALSE	2.81589	0.0048643	0.077436	1.22607	condition on vs pre
SHISA3	59.4939	FALSE	-2.81467	0.00488266	0.0776733	-4.00105	condition on vs pre
NAPB	1535.11	FALSE	2.8142	0.00488995	0.0777343	1.14078	condition on vs pre
ZNF689	4370.96	FALSE	2.81391	0.00489428	0.0777482	1.22209	condition on vs pre
PRR36	1804.02	FALSE	2.81345	0.0049013	0.0778046	1.31883	condition on vs pre
HLA-DPB1	6613.14	FALSE	-2.81254	0.00491525	0.0779711	-0.966974	condition on vs pre
LDHB	2935.29	FALSE	-2.81215	0.00492117	0.0780099	-1.15454	condition on vs pre
TMEM53	680.168	FALSE	-2.81092	0.00494008	0.0782545	-1.26194	condition on vs pre
FAM30A	168.129	FALSE	-2.80985	0.00495642	0.0784581	-2.94759	condition on vs pre
TPSB2	1297.98	FALSE	2.8093	0.00496489	0.0785368	1.42262	condition on vs pre
CTSO	1614.17	FALSE	-2.80545	0.00502468	0.0793709	-1.29408	condition on vs pre
HLA-C	26224.7	FALSE	-2.80553	0.00502342	0.0793709	-0.92617	condition on vs pre
IL22RA1	57.4704	FALSE	-2.80439	0.00504112	0.0795747	-3.28479	condition on vs pre
AC009963.2	43.683	FALSE	-2.8028	0.00506607	0.0798184	-3.52776	condition on vs pre
NSUN5P1	7853.04	FALSE	2.80264	0.00506868	0.0798184	1.35605	condition on vs pre
THEMIS	47.5904	FALSE	-2.8025	0.00507077	0.0798184	-2.91866	condition on vs pre
ZIC2	73.9018	FALSE	-2.80285	0.00506537	0.0798184	-3.61609	condition on vs pre
AC018665.1	751.91	FALSE	2.80089	0.00509616	0.080162	1.25777	condition on vs pre
LGI4	346.483	FALSE	-2.79976	0.00511411	0.0803598	-1.96449	condition on vs pre
TRGC2	113.735	FALSE	-2.79965	0.00511588	0.0803598	-2.04367	condition on vs pre
AC099329.1	229.731	FALSE	-2.79844	0.00513505	0.0806045	-2.98874	condition on vs pre
ARHGEF17	5275.2	FALSE	2.79799	0.00514214	0.0806248	1.12448	condition on vs pre
RPS6KA3	1109.08	FALSE	-2.79791	0.00514352	0.0806248	-1.29379	condition on vs pre
MAGI2-AS3	703.168	FALSE	-2.79734	0.00515254	0.08071	-1.16017	condition on vs pre
C1orf162	497.643	FALSE	-2.7967	0.00516273	0.080757	-1.60244	condition on vs pre
CCRL2	135.244	FALSE	-2.79685	0.0051604	0.080757	-1.86184	condition on vs pre
C1RL	3240.1	FALSE	-2.79329	0.00521742	0.0815557	-0.966127	condition on vs pre
BACE2	3384.92	FALSE	-2.79197	0.00523889	0.0817856	-1.72764	condition on vs pre
FAH	4124.87	FALSE	-2.79193	0.0052394	0.0817856	-1.03812	condition on vs pre
AL732372.2	1251.15	FALSE	2.79095	0.00525541	0.081865	1.21365	condition on vs pre
ARHGAP33	3041.46	FALSE	2.79131	0.00524956	0.081865	1.23454	condition on vs pre
MAPK8IP3	13022.9	FALSE	2.79099	0.0052547	0.081865	0.896457	condition on vs pre
TSLP	35.337	FALSE	-2.79042	0.00526394	0.081941	-4.25149	condition on vs pre
SMC2-AS1	56.0694	FALSE	2.78835	0.00529773	0.08241	3.41079	condition on vs pre
ACOT13	1659.23	FALSE	-2.78735	0.00531406	0.0826068	-1.30546	condition on vs pre
FABP5	1308.73	FALSE	-2.78658	0.0053267	0.0827461	-1.35772	condition on vs pre
C16orf54	173.7	FALSE	-2.78574	0.00534052	0.0829035	-1.9195	condition on vs pre
KIF5C	328.928	FALSE	2.78482	0.00535574	0.0830824	1.49506	condition on vs pre
FAM83H	9573.46	FALSE	2.78407	0.00536822	0.0832186	0.942475	condition on vs pre
ETS2	2008.75	FALSE	-2.783	0.00538585	0.0834011	-1.55342	condition on vs pre
ITFG2	1868.3	FALSE	2.78291	0.00538742	0.0834011	1.31484	condition on vs pre
NPIPB7	325.808	FALSE	2.78097	0.0054196	0.0838415	1.45609	condition on vs pre
ZNF517	1476.1	FALSE	2.78066	0.00542487	0.0838653	1.18301	condition on vs pre
ANO9	2999.57	FALSE	2.77908	0.00545133	0.0842165	1.30746	condition on vs pre
ITPR1	1795.88	FALSE	2.77848	0.00546141	0.0843143	0.990105	condition on vs pre
CD74	25987.6	FALSE	-2.77781	0.00547261	0.0843862	-0.924834	condition on vs pre
LRRK2	354.902	FALSE	-2.77776	0.00547358	0.0843862	-1.48273	condition on vs pre
HLA-E	16860.9	FALSE	-2.77683	0.00548915	0.0845683	-0.933749	condition on vs pre
IGFBP2	17347.2	FALSE	-2.7752	0.00551676	0.0848497	-0.945563	condition on vs pre
SIRPB1	143.365	FALSE	-2.77541	0.00551321	0.0848497	-2.94614	condition on vs pre
ZNF692	4951.87	FALSE	2.77508	0.00551874	0.0848497	1.51088	condition on vs pre
OVOL1	792.703	FALSE	2.77485	0.00552279	0.084854	1.73837	condition on vs pre
ZDHHC19	34.1816	FALSE	-2.77289	0.0055561	0.0853074	-4.2723	condition on vs pre
IGF2	6977.63	FALSE	-2.77172	0.00557607	0.0855555	-2.06732	condition on vs pre
SRD5A1	1319.16	FALSE	-2.7712	0.00558496	0.0856335	-1.08079	condition on vs pre
ULK3	5713.06	FALSE	2.76902	0.00562253	0.0861508	1.20817	condition on vs pre
GZMH	87.6695	FALSE	-2.76878	0.00562672	0.0861563	-2.46732	condition on vs pre
C4B	14858.3	FALSE	-2.7685	0.00563147	0.0861704	-1.63575	condition on vs pre
RPL23AP87	79.9056	FALSE	2.76793	0.0056413	0.086262	4.81007	condition on vs pre
AC092299.1	929.699	FALSE	2.76759	0.00564723	0.086294	1.25793	condition on vs pre
IGHV1-69	370.092	FALSE	-2.76644	0.00566714	0.0865394	-2.83146	condition on vs pre
IGLV1-44	276.724	FALSE	-2.76488	0.00569441	0.0868969	-3.40927	condition on vs pre
IGF1	385.716	FALSE	-2.76441	0.00570265	0.0869635	-2.63407	condition on vs pre
LRRC31	162.985	FALSE	-2.76321	0.00572353	0.0871507	-2.81782	condition on vs pre
OPTN	2645.47	FALSE	-2.7631	0.00572548	0.0871507	-1.11118	condition on vs pre
SLC25A13	1505.35	FALSE	-2.76304	0.00572656	0.0871507	-1.12018	condition on vs pre
AC025857.2	29.7875	FALSE	-2.76233	0.00573902	0.0872812	-3.63291	condition on vs pre
GRAMD1A	7002.84	FALSE	2.76207	0.00574364	0.0872925	0.917978	condition on vs pre
IGHV4-4	261.915	FALSE	-2.76116	0.00575971	0.0874775	-4.07651	condition on vs pre
SLC25A37	3925.79	FALSE	-2.76091	0.00576413	0.0874856	-1.43956	condition on vs pre
PRRG3	526.436	FALSE	-2.75995	0.00578107	0.0876243	-1.74187	condition on vs pre
RGS1	512.836	FALSE	-2.76001	0.00577998	0.0876243	-1.54197	condition on vs pre
FYB1	738.573	FALSE	-2.75856	0.00580574	0.087939	-1.73159	condition on vs pre
LINC01001	2332.72	FALSE	2.75825	0.0058111	0.0879609	1.1953	condition on vs pre
GCN1	11322.8	FALSE	2.75705	0.00583263	0.0882273	1.37692	condition on vs pre
CYP7B1	547.919	FALSE	-2.75663	0.00584009	0.0882808	-1.69422	condition on vs pre
AP000527.1	1216.15	FALSE	2.75613	0.00584896	0.0883555	2.30561	condition on vs pre
COX6A2	25.6496	FALSE	-2.7559	0.00585314	0.0883592	-4.94149	condition on vs pre
AL353622.1	746.017	FALSE	2.75266	0.00591128	0.089177	1.21181	condition on vs pre
ZNF182	646.465	FALSE	2.75101	0.00594113	0.0895672	1.56665	condition on vs pre
IGHV3-69-1	365.777	FALSE	-2.75069	0.00594701	0.0895958	-3.17112	condition on vs pre
JAG2	2384.1	FALSE	2.74882	0.00598101	0.0900476	0.968317	condition on vs pre
HRAS	3618.76	FALSE	2.74739	0.00600714	0.0903805	0.978794	condition on vs pre
MLKL	752.051	FALSE	-2.74663	0.0060211	0.09053	-1.46002	condition on vs pre
CDHR2	169.223	FALSE	-2.74632	0.00602674	0.0905542	-2.70945	condition on vs pre
PDGFRB	9655.4	FALSE	2.7454	0.0060438	0.0907498	0.914656	condition on vs pre
ATAT1	1812.46	FALSE	2.74492	0.00605251	0.0908199	0.987168	condition on vs pre
PDE4DIP	3367.52	FALSE	-2.74284	0.00609108	0.0913378	-1.31038	condition on vs pre
NEK6	2006.73	FALSE	-2.74202	0.00610619	0.0915033	-1.05118	condition on vs pre
MMP25-AS1	1490.06	FALSE	2.73745	0.00619169	0.0927227	1.51018	condition on vs pre
MFSD10	7376.79	FALSE	2.73668	0.00620624	0.092817	0.971972	condition on vs pre
TMEM140	867.415	FALSE	-2.73688	0.00620253	0.092817	-1.21444	condition on vs pre
AC245060.4	154.44	FALSE	2.73382	0.00626041	0.0934564	4.11346	condition on vs pre
AL450998.1	75.338	FALSE	-2.73392	0.00625853	0.0934564	-3.47256	condition on vs pre
HSD11B2	877.273	FALSE	2.73377	0.00626147	0.0934564	1.42957	condition on vs pre
FPR1	194.819	FALSE	-2.73312	0.00627377	0.0935778	-2.01743	condition on vs pre
TMEM217	73.2252	FALSE	-2.73165	0.00630173	0.0939325	-2.53994	condition on vs pre
PLVAP	4258.04	FALSE	2.73119	0.00631059	0.0940023	1.41378	condition on vs pre
ETFDH	1614.51	FALSE	-2.73051	0.00632368	0.0941349	-1.072	condition on vs pre
PNPLA3	190.156	FALSE	-2.73009	0.0063318	0.0941933	-2.26828	condition on vs pre
RBMS3	584.58	FALSE	-2.72862	0.00636003	0.0944882	-1.34574	condition on vs pre
RUNX3	293.564	FALSE	-2.72882	0.0063562	0.0944882	-1.37165	condition on vs pre
ADA2	1660.27	FALSE	-2.72807	0.00637053	0.0945818	-1.03855	condition on vs pre
EHMT2	4652.78	FALSE	2.72649	0.00640123	0.0949749	0.935142	condition on vs pre
IQSEC3	125.755	FALSE	2.7262	0.00640691	0.0949964	3.81073	condition on vs pre
ABHD16B	190.078	FALSE	2.72385	0.00645257	0.0956103	1.77116	condition on vs pre
ADGRG6	604.986	FALSE	-2.72187	0.00649138	0.096122	-2.18338	condition on vs pre
EBP	2581.34	FALSE	-2.72124	0.00650373	0.0962415	-1.34249	condition on vs pre
NADK2	2723.1	FALSE	-2.72069	0.00651454	0.0963381	-1.15049	condition on vs pre
VNN2	91.9838	FALSE	-2.72023	0.00652375	0.0964108	-2.37638	condition on vs pre
GPC1	7312.75	FALSE	2.71899	0.00654822	0.0967088	0.897865	condition on vs pre
IGHV2-5	192.089	FALSE	-2.7185	0.0065578	0.0967868	-2.90941	condition on vs pre
CRYZ	2049.02	FALSE	-2.71761	0.00657551	0.0969845	-1.15514	condition on vs pre
SEPT5	1065.47	FALSE	2.7169	0.00658965	0.0971293	1.58198	condition on vs pre
PRRT4	54.4508	FALSE	-2.71565	0.00661453	0.0974321	-3.20712	condition on vs pre
LINC01226	211.905	FALSE	2.7147	0.00663353	0.0975841	1.97985	condition on vs pre
SGK2	300.321	FALSE	-2.71477	0.00663228	0.0975841	-1.78241	condition on vs pre
PRF1	157.827	FALSE	-2.71447	0.00663823	0.0975893	-1.82715	condition on vs pre
TCIM	891.669	FALSE	-2.71365	0.00665456	0.0977655	-1.36544	condition on vs pre
LINC00894	621.96	FALSE	2.71306	0.00666641	0.0978756	1.36019	condition on vs pre
ZNF785	2515.08	FALSE	2.7128	0.00667181	0.0978909	0.954403	condition on vs pre
GABRD	314.805	FALSE	2.71256	0.00667651	0.097896	1.3845	condition on vs pre
NR5A2	314.978	FALSE	-2.71218	0.00668428	0.0979461	-1.56424	condition on vs pre
ERICH1	586.642	FALSE	-2.71003	0.00672764	0.0985172	-1.48627	condition on vs pre
DUSP28	819.789	FALSE	2.70912	0.00674612	0.0987234	1.46852	condition on vs pre
AC016582.3	545.024	FALSE	2.70788	0.00677137	0.0988375	2.2466	condition on vs pre
AC108134.1	570.521	FALSE	2.70792	0.00677073	0.0988375	1.81938	condition on vs pre
AP006284.1	2031.91	FALSE	2.70766	0.0067759	0.0988375	1.27871	condition on vs pre
FCN3	593.877	FALSE	-2.70769	0.00677536	0.0988375	-2.50364	condition on vs pre
PLXDC1	3904.77	FALSE	2.70795	0.00677011	0.0988375	1.27093	condition on vs pre
FBXL19	3337.45	FALSE	2.70718	0.00678581	0.0988964	0.924129	condition on vs pre
SFRP1	523.402	FALSE	-2.70703	0.00678873	0.0988964	-2.17803	condition on vs pre
NTF3	75.5571	FALSE	-2.70593	0.00681129	0.0991607	-3.31427	condition on vs pre
PLIN1	2341.01	FALSE	-2.7046	0.00683867	0.0994948	-2.4381	condition on vs pre
AC092143.2	23.2157	FALSE	2.70427	0.00684537	0.0995279	6.39698	condition on vs pre
AIF1	707.152	FALSE	-2.70201	0.0068921	0.0999489	-1.09438	condition on vs pre
LINC02037	24.1657	FALSE	-2.70201	0.00689211	0.0999489	-3.86963	condition on vs pre
LIPA	4497.31	FALSE	-2.70216	0.006889	0.0999489	-1.31578	condition on vs pre
STAT1	5732.14	FALSE	-2.70259	0.00688016	0.0999489	-0.926308	condition on vs pre
AC005336.1	53.5546	FALSE	-2.70119	0.00690913	0.100086	-4.70644	condition on vs pre
LAP3	4707.76	FALSE	-2.70103	0.00691249	0.100086	-0.954011	condition on vs pre
THPO	150.488	FALSE	-2.70091	0.00691495	0.100086	-2.59773	condition on vs pre
SOX10	44.2692	FALSE	2.69979	0.0069384	0.100361	5.01103	condition on vs pre
HMGCL	3164.39	FALSE	-2.69953	0.00694377	0.100374	-1.12398	condition on vs pre
RGL2	13789.5	FALSE	2.69846	0.0069662	0.100634	1.1718	condition on vs pre
MAN1A1	3448.11	FALSE	-2.69808	0.00697413	0.100684	-1.0031	condition on vs pre
LAMA5	21627.3	FALSE	2.6973	0.0069904	0.100854	1.51862	condition on vs pre
KARSP2	22.6476	FALSE	-2.69675	0.00700195	0.100956	-4.24067	condition on vs pre
GOLGA8A	10859.6	FALSE	2.69619	0.00701376	0.101061	1.28636	condition on vs pre
LINC02656	97.7576	FALSE	2.6944	0.00705163	0.101542	3.67952	condition on vs pre
MS4A4A	599.528	FALSE	-2.69371	0.00706608	0.101685	-1.71901	condition on vs pre
GNAI1	664.111	FALSE	-2.69347	0.00707132	0.101695	-1.60413	condition on vs pre
MCTP2	182.983	FALSE	-2.6924	0.00709389	0.101954	-2.09351	condition on vs pre
TGFBR2	2967.64	FALSE	-2.69167	0.00710943	0.102112	-0.910539	condition on vs pre
MAGED2	25684.6	FALSE	2.69062	0.00713194	0.10237	1.22645	condition on vs pre
SAMHD1	3134.45	FALSE	-2.68863	0.00717468	0.102918	-0.985028	condition on vs pre
LNPK	2935.41	FALSE	-2.68644	0.00722183	0.103528	-2.09793	condition on vs pre
AP002433.1	29.3979	FALSE	-2.6861	0.00722925	0.103568	-4.6409	condition on vs pre
PLCB3	4322.43	FALSE	2.68589	0.0072338	0.103568	0.930509	condition on vs pre
NRCAM	753.61	FALSE	2.68516	0.0072495	0.103726	1.15452	condition on vs pre
RERGL	70.4146	FALSE	-2.68425	0.00726922	0.103943	-3.42818	condition on vs pre
CLCN4	134.929	FALSE	-2.68388	0.00727733	0.103992	-1.7583	condition on vs pre
KYNU	2857.15	FALSE	-2.68285	0.00729973	0.104246	-1.70173	condition on vs pre
SOGA1	4868.98	FALSE	2.6824	0.0073096	0.104321	1.00651	condition on vs pre
ALPL	817.101	FALSE	-2.68124	0.007335	0.104588	-2.54936	condition on vs pre
ZNF611	1063.4	FALSE	2.68112	0.00733764	0.104588	1.19631	condition on vs pre
EHMT2-AS1	235.491	FALSE	2.67943	0.0073748	0.105051	1.9198	condition on vs pre
HKDC1	96.6402	FALSE	-2.67849	0.00739549	0.105279	-3.65285	condition on vs pre
NUGGC	269.184	FALSE	-2.67793	0.00740796	0.10539	-1.90769	condition on vs pre
MYC	2743.44	FALSE	2.67753	0.00741675	0.105448	1.94712	condition on vs pre
AC009163.2	21.3325	FALSE	2.67683	0.0074323	0.105586	6.16529	condition on vs pre
AC135068.8	46.0714	FALSE	-2.67603	0.00744995	0.105586	-3.24195	condition on vs pre
AGR2	12940.1	FALSE	-2.67624	0.00744544	0.105586	-2.06515	condition on vs pre
APLN	572.375	FALSE	2.67643	0.00744104	0.105586	2.64833	condition on vs pre
CLSTN2	7009.6	FALSE	2.67663	0.00743676	0.105586	1.04786	condition on vs pre
CD163L1	410.601	FALSE	-2.67527	0.00746683	0.105709	-1.63044	condition on vs pre
EFEMP1	3870.72	FALSE	-2.67501	0.00747273	0.105709	-2.10541	condition on vs pre
PATJ	4024.31	FALSE	2.6752	0.00746837	0.105709	1.0659	condition on vs pre
GPM6A	121.536	FALSE	-2.67364	0.00750326	0.106074	-2.65888	condition on vs pre
NCF1	797.572	FALSE	-2.67285	0.00752088	0.106257	-1.59844	condition on vs pre
SPAG16	253.316	FALSE	-2.67264	0.00752574	0.106259	-1.65265	condition on vs pre
LINC01977	769.326	FALSE	2.67215	0.00753659	0.106345	1.46774	condition on vs pre
HLA-DRB6	1075.18	FALSE	-2.67178	0.00754494	0.106396	-1.00862	condition on vs pre
ANKRD30BP1	37.959	FALSE	2.66905	0.00760655	0.107095	5.13756	condition on vs pre
CELSR2	5206.08	FALSE	2.66891	0.00760971	0.107095	1.41616	condition on vs pre
DYDC2	25.6005	FALSE	-2.66876	0.00761308	0.107095	-4.34765	condition on vs pre
GALK1	1428.17	FALSE	-2.66874	0.00761353	0.107095	-1.06086	condition on vs pre
CDHR1	28.6008	FALSE	-2.66853	0.0076185	0.107097	-3.61604	condition on vs pre
AC007191.1	375.718	FALSE	2.66563	0.00768435	0.107955	1.54029	condition on vs pre
AC135050.6	670.301	FALSE	2.6634	0.00773558	0.108607	1.61324	condition on vs pre
PPM1K	1211.53	FALSE	-2.66307	0.00774312	0.108645	-1.01184	condition on vs pre
IGLV2-8	482.957	FALSE	-2.66257	0.00775455	0.108738	-1.9152	condition on vs pre
IGKV2-24	135.193	FALSE	-2.66204	0.00776683	0.108774	-3.23899	condition on vs pre
TMEM71	97.5697	FALSE	-2.66204	0.00776683	0.108774	-2.6085	condition on vs pre
CLRN3	74.6627	FALSE	-2.66098	0.00779134	0.108846	-4.59896	condition on vs pre
KNL1	642.337	FALSE	-2.66139	0.00778187	0.108846	-1.7319	condition on vs pre
NRG4	94.7598	FALSE	2.66159	0.00777731	0.108846	3.71882	condition on vs pre
SRCIN1	1716.59	FALSE	2.66101	0.00779057	0.108846	1.07607	condition on vs pre
AL031705.1	27.2399	FALSE	2.66006	0.00781261	0.109076	4.86209	condition on vs pre
BRF1	3155.44	FALSE	2.6594	0.00782801	0.109223	0.91768	condition on vs pre
AC104958.2	44.7486	FALSE	-2.65881	0.00784166	0.109345	-3.28339	condition on vs pre
AKR1A1	5664.42	FALSE	-2.65802	0.00786013	0.109535	-0.947926	condition on vs pre
NAPSB	540.764	FALSE	-2.65735	0.00787565	0.109615	-2.2145	condition on vs pre
SLIT2	1088.66	FALSE	-2.65754	0.00787139	0.109615	-1.84637	condition on vs pre
COL7A1	1801.13	FALSE	2.65641	0.00789777	0.109855	1.31983	condition on vs pre
FMO4	455.55	FALSE	-2.65461	0.00793994	0.11006	-1.48155	condition on vs pre
KIFC2	12531.7	FALSE	2.65476	0.00793657	0.11006	1.10937	condition on vs pre
MIR210HG	1108.22	FALSE	2.65453	0.00794184	0.11006	1.64727	condition on vs pre
MTCL1	833.239	FALSE	2.65475	0.00793675	0.11006	1.59481	condition on vs pre
SLC9B2	337.7	FALSE	-2.65523	0.00792536	0.11006	-1.31149	condition on vs pre
SYK	772.404	FALSE	-2.65536	0.00792241	0.11006	-1.22984	condition on vs pre
CHST1	977.734	FALSE	2.65407	0.00795264	0.110141	1.03133	condition on vs pre
RPS6KA6	299.325	FALSE	2.65222	0.00799633	0.110678	1.88128	condition on vs pre
NFKBIE	904.622	FALSE	-2.65135	0.00801698	0.110896	-1.09709	condition on vs pre
PLEC	29780.2	FALSE	2.65083	0.00802949	0.111	1.10585	condition on vs pre
CLDN10	59.3603	FALSE	-2.65036	0.00804053	0.111085	-3.48329	condition on vs pre
AACSP1	110.807	FALSE	2.64957	0.00805939	0.111277	2.49314	condition on vs pre
LINC00482	124.399	FALSE	-2.64918	0.00806863	0.111336	-2.4028	condition on vs pre
SPTBN4	845.414	FALSE	2.64818	0.0080927	0.1116	2.67729	condition on vs pre
CCR1	320.222	FALSE	-2.64476	0.0081748	0.112663	-1.71542	condition on vs pre
AL021707.5	367.079	FALSE	-2.64447	0.00818188	0.112691	-1.33648	condition on vs pre
GIGYF1	9091.35	FALSE	2.6437	0.00820042	0.11283	0.965277	condition on vs pre
KRT14	79.0181	FALSE	2.64364	0.008202	0.11283	4.22166	condition on vs pre
AC005702.1	33.8338	FALSE	2.64245	0.00823096	0.113159	5.51817	condition on vs pre
JARID2	2493.64	FALSE	2.64203	0.00824103	0.113228	1.04062	condition on vs pre
CNR1	60.4601	FALSE	-2.641	0.00826628	0.113506	-3.50485	condition on vs pre
ZNF580	2046.64	FALSE	2.63985	0.00829426	0.113821	1.19357	condition on vs pre
IGHJ3	94.901	FALSE	-2.63903	0.00831445	0.114028	-4.06358	condition on vs pre
DACT2	90.8929	FALSE	-2.63848	0.00832784	0.114142	-3.3221	condition on vs pre
AC104116.1	51.0073	FALSE	-2.63502	0.00841316	0.115241	-5.34775	condition on vs pre
RASD1	509.779	FALSE	-2.63437	0.00842927	0.115392	-1.8168	condition on vs pre
WDR97	628.665	FALSE	2.63358	0.0084489	0.11559	1.10866	condition on vs pre
CCDC85A	66.1	FALSE	2.63333	0.00845517	0.115605	4.02228	condition on vs pre
AC005785.1	372.949	FALSE	2.6324	0.00847852	0.115854	1.91603	condition on vs pre
FBXL19-AS1	1253.65	FALSE	2.6306	0.0085234	0.116363	1.92263	condition on vs pre
HSDL1	1924.07	FALSE	2.63049	0.00852614	0.116363	1.19254	condition on vs pre
PEX5L	337.443	FALSE	2.62929	0.00855634	0.116705	1.36368	condition on vs pre
CASP1	701.88	FALSE	-2.62836	0.00857969	0.116952	-1.26963	condition on vs pre
AC093525.6	545.97	FALSE	2.62748	0.00860202	0.117186	1.26254	condition on vs pre
GARNL3	431.178	FALSE	2.62474	0.00867152	0.118061	1.76092	condition on vs pre
DNAH1	1283.24	FALSE	-2.62418	0.00868568	0.118063	-1.62102	condition on vs pre
DOCK11	445.813	FALSE	-2.62413	0.00868711	0.118063	-1.45916	condition on vs pre
SLC29A2	953.024	FALSE	2.62412	0.00868741	0.118063	1.52732	condition on vs pre
RRAS2	615.703	FALSE	-2.62267	0.00872449	0.118495	-1.8247	condition on vs pre
OR10J6P	35.9647	FALSE	-2.61922	0.00881312	0.119587	-5.50222	condition on vs pre
RFX8	161.727	FALSE	2.61913	0.00881553	0.119587	4.04262	condition on vs pre
AC023908.3	221.009	FALSE	2.61708	0.00886843	0.120232	2.97595	condition on vs pre
AL157895.1	33.9341	FALSE	2.61658	0.00888155	0.120337	4.14159	condition on vs pre
AGAP6	1620.79	FALSE	2.6129	0.0089777	0.121567	1.0585	condition on vs pre
PARP9	3059.1	FALSE	-2.61233	0.00899266	0.121696	-0.920261	condition on vs pre
C1QTNF1	1344.39	FALSE	-2.61134	0.00901876	0.121976	-1.03831	condition on vs pre
FZD3	757.117	FALSE	-2.61091	0.0090301	0.122056	-1.57805	condition on vs pre
AC013472.1	31.718	FALSE	2.61034	0.00904532	0.122188	4.18693	condition on vs pre
FDX1	889.405	FALSE	-2.60984	0.00905842	0.122263	-1.22373	condition on vs pre
IGHV3-23	838.078	FALSE	-2.60972	0.00906177	0.122263	-1.44173	condition on vs pre
CMKLR1	911.425	FALSE	-2.60944	0.00906909	0.122289	-1.12671	condition on vs pre
AC005086.3	25.3449	FALSE	2.60899	0.00908094	0.122302	5.95901	condition on vs pre
GYS1	2351.05	FALSE	2.60919	0.00907559	0.122302	1.25934	condition on vs pre
FHL1	2032.21	FALSE	-2.60812	0.00910407	0.122323	-1.57066	condition on vs pre
PIK3C2B	2617.57	FALSE	2.60811	0.00910427	0.122323	1.04232	condition on vs pre
THSD4	4339.34	FALSE	2.6085	0.0090941	0.122323	1.12019	condition on vs pre
UCKL1	3850.6	FALSE	2.60836	0.00909774	0.122323	1.04916	condition on vs pre
CHL1	113.844	FALSE	-2.60787	0.00911077	0.122337	-2.34328	condition on vs pre
IGFBP6	551.26	FALSE	-2.60681	0.00913906	0.122587	-1.56481	condition on vs pre
VSIR	1090.09	FALSE	-2.60676	0.00914034	0.122587	-1.02057	condition on vs pre
ELMO3	2202.06	FALSE	2.60649	0.00914768	0.122613	0.997918	condition on vs pre
CDC14B	630.961	FALSE	-2.60233	0.00925926	0.124034	-1.68218	condition on vs pre
ATF6B	7624.74	FALSE	2.60182	0.00927315	0.124146	1.04288	condition on vs pre
MSRA	267.062	FALSE	-2.60106	0.00929374	0.12434	-2.16397	condition on vs pre
RHBDF1	6616.79	FALSE	2.60079	0.00930082	0.12434	0.939968	condition on vs pre
SH3D21	1556.67	FALSE	2.60067	0.00930421	0.12434	1.42655	condition on vs pre
NFAM1	491.233	FALSE	-2.60022	0.00931651	0.12443	-1.14187	condition on vs pre
PART1	82.5347	FALSE	2.59927	0.00934218	0.124666	3.11342	condition on vs pre
VEGFA	14749.6	FALSE	2.59916	0.00934522	0.124666	1.06532	condition on vs pre
UNC80	379.696	FALSE	2.59843	0.00936517	0.124858	1.21445	condition on vs pre
ICOS	48.9955	FALSE	-2.59787	0.00938027	0.124985	-3.18434	condition on vs pre
AC092368.3	545.426	FALSE	-2.59664	0.00941392	0.125359	-1.39727	condition on vs pre
FAM13A	977.332	FALSE	-2.59629	0.00942365	0.125414	-1.79784	condition on vs pre
DUSP1	3638.61	FALSE	-2.59414	0.00948278	0.126127	-0.994403	condition on vs pre
APBB1IP	448.581	FALSE	-2.59325	0.00950731	0.126378	-1.27473	condition on vs pre
TNRC18	10502.3	FALSE	2.59114	0.00956579	0.12708	0.927866	condition on vs pre
AC104938.1	44.4729	FALSE	2.59094	0.00957147	0.127081	4.29627	condition on vs pre
RDX	1715.14	FALSE	-2.59047	0.00958446	0.127178	-1.02362	condition on vs pre
MAPK15	508.989	FALSE	2.59016	0.00959312	0.127218	2.1497	condition on vs pre
CXCL8	206.563	FALSE	-2.58847	0.00964026	0.127713	-2.52523	condition on vs pre
DOC2A	1158.83	FALSE	2.58834	0.00964398	0.127713	1.37884	condition on vs pre
GDNF-AS1	211.692	FALSE	-2.58801	0.00965321	0.127713	-2.18412	condition on vs pre
NDUFA4L2	838.093	FALSE	2.58805	0.00965209	0.127713	1.14361	condition on vs pre
IGKV1-5	773.324	FALSE	-2.58693	0.00968347	0.128038	-2.34506	condition on vs pre
AC132872.3	240.174	FALSE	2.58655	0.00969422	0.128105	1.8632	condition on vs pre
HEY1	779.651	FALSE	2.58568	0.00971878	0.128354	1.33869	condition on vs pre
DLEC1	297.526	FALSE	-2.58507	0.00973589	0.128505	-1.46987	condition on vs pre
TYMP	8388.11	FALSE	-2.58411	0.00976304	0.128787	-1.15342	condition on vs pre
ULK1	7085.98	FALSE	2.58357	0.0097783	0.128913	1.03934	condition on vs pre
NRSN1	55.1401	FALSE	2.58038	0.00986919	0.130035	4.51846	condition on vs pre
ARHGDIG	118.942	FALSE	-2.57808	0.0099351	0.130626	-2.95078	condition on vs pre
LENG8	27607.9	FALSE	2.578	0.00993726	0.130626	0.877208	condition on vs pre
MIR497HG	189.796	FALSE	-2.57812	0.009934	0.130626	-1.57287	condition on vs pre
NR4A3	115.215	FALSE	-2.57816	0.00993266	0.130626	-2.02961	condition on vs pre
SPPL2B	5892.2	FALSE	2.57741	0.00995431	0.130773	0.91447	condition on vs pre
DIO3OS	444.329	FALSE	-2.57695	0.00996753	0.13087	-1.92563	condition on vs pre
ANKRD30A	1350.13	FALSE	-2.57586	0.0099992	0.130904	-2.23624	condition on vs pre
CXCL10	541.041	FALSE	-2.57591	0.0099976	0.130904	-1.65757	condition on vs pre
DGKD	5065.14	FALSE	2.57599	0.00999538	0.130904	1.1527	condition on vs pre
MS4A1	88.3429	FALSE	-2.57586	0.00999912	0.130904	-3.19021	condition on vs pre
TCF7L2	967.442	FALSE	-2.57659	0.0099779	0.130904	-1.23277	condition on vs pre
SLC35E3	2821.13	FALSE	2.57463	0.0100347	0.131293	1.19293	condition on vs pre
BICDL2	5322.34	FALSE	2.57373	0.0100608	0.131558	0.888445	condition on vs pre
DYRK1B	1258.72	FALSE	2.57325	0.0100749	0.131666	0.956977	condition on vs pre
ASB9	126.385	FALSE	-2.57279	0.0100881	0.131761	-2.25554	condition on vs pre
CTBP1-AS	611.463	FALSE	2.57161	0.0101227	0.132135	1.12567	condition on vs pre
AL591845.1	595.905	FALSE	2.57117	0.0101356	0.132151	1.30006	condition on vs pre
CD226	410.611	FALSE	-2.57124	0.0101334	0.132151	-1.72503	condition on vs pre
AFDN-DT	191.318	FALSE	2.57006	0.010168	0.132218	3.23923	condition on vs pre
ANKS3	3073.68	FALSE	2.57049	0.0101554	0.132218	0.93101	condition on vs pre
FAM57B	577.81	FALSE	2.57074	0.0101483	0.132218	1.18529	condition on vs pre
KLHL17	1624.76	FALSE	2.57013	0.010166	0.132218	1.09962	condition on vs pre
LCP2	1020.65	FALSE	-2.56979	0.0101761	0.132218	-1.2462	condition on vs pre
SULT1A3	547.47	FALSE	2.56991	0.0101724	0.132218	1.38738	condition on vs pre
PRSS22	2221.81	FALSE	2.56557	0.0103007	0.133684	0.978822	condition on vs pre
RN7SL718P	109.486	FALSE	2.56558	0.0103004	0.133684	3.50517	condition on vs pre
AC007991.3	100.244	FALSE	-2.56485	0.010322	0.133882	-3.96002	condition on vs pre
CPQ	1288.69	FALSE	-2.56412	0.0103436	0.134085	-1.30987	condition on vs pre
AC074143.1	3333.78	FALSE	2.56324	0.0103701	0.134197	0.966832	condition on vs pre
CROCC	4348.45	FALSE	2.56343	0.0103645	0.134197	0.924458	condition on vs pre
SNTB1	934.049	FALSE	-2.56363	0.0103583	0.134197	-1.41462	condition on vs pre
AC100803.3	125.454	FALSE	2.5624	0.0103953	0.134379	1.79448	condition on vs pre
EPPK1	12462	FALSE	2.56237	0.0103962	0.134379	1.36732	condition on vs pre
MINAR2	26.0895	FALSE	2.56067	0.010447	0.134959	5.53526	condition on vs pre
IL15RA	371.549	FALSE	-2.5598	0.0104733	0.13522	-1.35684	condition on vs pre
HECTD4	6338.42	FALSE	2.55909	0.0104948	0.135261	1.15935	condition on vs pre
IGFN1	168.124	FALSE	-2.55938	0.0104858	0.135261	-2.41903	condition on vs pre
PDGFRA	2089.14	FALSE	-2.5589	0.0105005	0.135261	-1.13068	condition on vs pre
ZNF646	2948.68	FALSE	2.55891	0.0105	0.135261	0.878981	condition on vs pre
CYP24A1	41.1625	FALSE	2.55799	0.0105279	0.135536	5.04509	condition on vs pre
APBA1	502.162	FALSE	-2.5554	0.0106065	0.13647	-2.20507	condition on vs pre
IFI44	965.386	FALSE	-2.55502	0.0106182	0.136542	-1.00604	condition on vs pre
CLDN16	56.4823	FALSE	-2.55482	0.0106244	0.136544	-3.42912	condition on vs pre
AC006128.1	1089.73	FALSE	2.55358	0.0106623	0.136885	1.16278	condition on vs pre
CD1A	26.0841	FALSE	-2.55355	0.0106631	0.136885	-5.94972	condition on vs pre
ST6GALNAC6	2463.38	FALSE	-2.55327	0.0106718	0.136918	-1.01215	condition on vs pre
IL16	842.06	FALSE	-2.55287	0.0106841	0.136997	-1.32388	condition on vs pre
DCXR	13133.7	FALSE	-2.55263	0.0106912	0.137011	-1.08636	condition on vs pre
GGTA1P	331.006	FALSE	-2.5516	0.010723	0.137028	-1.29395	condition on vs pre
GSDMB	2217.08	FALSE	-2.55169	0.01072	0.137028	-1.16787	condition on vs pre
HLA-DQB1	2166.87	FALSE	-2.55235	0.0106999	0.137028	-0.941082	condition on vs pre
IGKV6-21	106.282	FALSE	-2.55183	0.0107158	0.137028	-3.61439	condition on vs pre
PYROXD2	1021.9	FALSE	2.55194	0.0107124	0.137028	1.851	condition on vs pre
AL662899.2	666.014	FALSE	2.55124	0.0107341	0.137092	1.12954	condition on vs pre
EML2	2942.47	FALSE	2.54979	0.0107788	0.137585	1.01885	condition on vs pre
AC022167.2	618.093	FALSE	2.54915	0.0107985	0.137602	1.35093	condition on vs pre
AL118506.1	1085	FALSE	2.54944	0.0107897	0.137602	1.11502	condition on vs pre
MTHFS	1055.26	FALSE	-2.54926	0.0107951	0.137602	-1.16958	condition on vs pre
PDCD1	85.0854	FALSE	-2.54818	0.0108287	0.137907	-2.12329	condition on vs pre
GJA1	13486	FALSE	2.54792	0.0108366	0.13793	1.31922	condition on vs pre
GBE1	949.364	FALSE	-2.54709	0.0108625	0.138181	-1.10779	condition on vs pre
AC068580.4	7769.3	FALSE	-2.5433	0.0109811	0.139267	-1.206	condition on vs pre
CACHD1	523.474	FALSE	-2.54375	0.0109669	0.139267	-1.47872	condition on vs pre
CYP21A1P	574.731	FALSE	-2.54351	0.0109745	0.139267	-1.61945	condition on vs pre
GFRA2	70.5777	FALSE	-2.54314	0.0109862	0.139267	-3.44416	condition on vs pre
IRF4	215.889	FALSE	-2.54382	0.0109649	0.139267	-1.46851	condition on vs pre
MGST1	9846.25	FALSE	-2.5441	0.0109558	0.139267	-0.889323	condition on vs pre
NECTIN3	168.996	FALSE	-2.54298	0.0109912	0.139267	-1.98571	condition on vs pre
ADGRL1	2111.7	FALSE	2.54258	0.0110037	0.139347	0.894057	condition on vs pre
PLD1	705.433	FALSE	-2.54236	0.0110107	0.139358	-1.51943	condition on vs pre
NUDT7	294.097	FALSE	-2.5408	0.0110598	0.1399	-1.81956	condition on vs pre
TGFBI	5072.37	FALSE	-2.54017	0.0110799	0.139997	-0.90698	condition on vs pre
WLS	1032.58	FALSE	-2.54021	0.0110785	0.139997	-0.961536	condition on vs pre
SH2D1A	81.5062	FALSE	-2.53841	0.0111359	0.140571	-2.3348	condition on vs pre
ZNF512B	4804.15	FALSE	2.53834	0.0111379	0.140571	1.15829	condition on vs pre
FKBP5	2001.2	FALSE	-2.53554	0.0112273	0.141463	-1.21548	condition on vs pre
FYN	1470.26	FALSE	-2.5358	0.0112191	0.141463	-1.36668	condition on vs pre
USP30-AS1	59.8763	FALSE	-2.53554	0.0112274	0.141463	-2.44423	condition on vs pre
FBXL6	3344.96	FALSE	2.53464	0.0112564	0.141749	0.972825	condition on vs pre
DNM1P51	134.192	FALSE	-2.53304	0.0113077	0.142315	-2.61339	condition on vs pre
KLRG1	156.249	FALSE	-2.53219	0.0113354	0.142584	-1.72568	condition on vs pre
VPS9D1-AS1	323.03	FALSE	2.53196	0.0113428	0.142598	2.20653	condition on vs pre
MLLT10	2086.25	FALSE	2.53059	0.011387	0.143073	1.23929	condition on vs pre
GOLGA2P7	5760.88	FALSE	2.52955	0.0114207	0.143297	0.867451	condition on vs pre
MADD	3915.13	FALSE	2.5296	0.0114191	0.143297	0.997078	condition on vs pre
RNF125	604.078	FALSE	-2.52946	0.0114239	0.143297	-1.08215	condition on vs pre
AP000944.2	152.487	FALSE	-2.52808	0.0114688	0.143698	-2.45314	condition on vs pre
ECI2	2618.89	FALSE	-2.52828	0.0114624	0.143698	-1.19681	condition on vs pre
AC116347.1	34.4168	FALSE	-2.52767	0.0114821	0.143785	-3.71812	condition on vs pre
ZFP57	72.9904	FALSE	-2.52668	0.0115145	0.144111	-2.59882	condition on vs pre
CCL11	137.615	FALSE	-2.52575	0.0115453	0.144404	-2.61469	condition on vs pre
NUDT16P1	260.348	FALSE	-2.52558	0.0115507	0.144404	-2.25949	condition on vs pre
KBTBD11	204.171	FALSE	-2.52519	0.0115635	0.144482	-1.64933	condition on vs pre
GIMAP4	1092	FALSE	-2.52493	0.0115722	0.144511	-1.29971	condition on vs pre
AC010507.1	523.304	FALSE	2.52436	0.0115909	0.144664	1.4144	condition on vs pre
BCL2L10	34.5152	FALSE	-2.52401	0.0116026	0.14473	-3.35288	condition on vs pre
KCNA2	23.4657	FALSE	-2.52297	0.011637	0.144999	-3.55131	condition on vs pre
TELO2	6369.99	FALSE	2.52296	0.0116371	0.144999	0.860291	condition on vs pre
SH3TC1	1406.1	FALSE	-2.52258	0.0116496	0.145075	-1.11359	condition on vs pre
LMO3	279.496	FALSE	-2.52222	0.0116617	0.145145	-1.61046	condition on vs pre
MZF1	3464.02	FALSE	2.52192	0.0116715	0.145187	0.915238	condition on vs pre
KRT31	143.456	FALSE	2.5209	0.0117054	0.145528	3.05463	condition on vs pre
KREMEN2	361.468	FALSE	2.51995	0.0117373	0.145844	1.25254	condition on vs pre
SAMD1	2372.59	FALSE	2.51938	0.0117563	0.145999	0.898041	condition on vs pre
LRFN4	3070.87	FALSE	2.51851	0.0117852	0.146277	1.65225	condition on vs pre
RNF165	320.118	FALSE	2.51769	0.0118126	0.146536	1.51488	condition on vs pre
ALOX12P2	257.441	FALSE	-2.51698	0.0118365	0.146671	-2.26406	condition on vs pre
GABBR1	3565.9	FALSE	2.51713	0.0118317	0.146671	1.06151	condition on vs pre
RPSAP58	22.8988	FALSE	2.51673	0.0118448	0.146693	6.06762	condition on vs pre
AC211476.3	32.5422	FALSE	2.51564	0.0118816	0.147068	6.61239	condition on vs pre
FAM107A	99.5339	FALSE	-2.51494	0.0119053	0.147149	-1.8889	condition on vs pre
POTEG	317.071	FALSE	-2.51486	0.0119078	0.147149	-3.00048	condition on vs pre
SH3RF2	304.948	FALSE	-2.51521	0.0118963	0.147149	-2.09027	condition on vs pre
ATN1	9586.66	FALSE	2.51418	0.0119309	0.147353	1.05665	condition on vs pre
DNM1	2433.96	FALSE	2.51242	0.0119905	0.148008	1.76941	condition on vs pre
TMEM120B	3546.94	FALSE	2.51142	0.0120247	0.148348	1.02325	condition on vs pre
IFIT2	666.242	FALSE	-2.51114	0.0120342	0.148385	-1.17962	condition on vs pre
SCN8A	691.667	FALSE	-2.51006	0.0120711	0.148758	-2.01796	condition on vs pre
OASL	253.713	FALSE	-2.50899	0.0121079	0.149129	-1.67768	condition on vs pre
SLFN5	1406.06	FALSE	-2.50843	0.0121269	0.149282	-1.05336	condition on vs pre
IHH	22.9558	FALSE	-2.50803	0.0121406	0.149369	-3.90192	condition on vs pre
PRKAG2-AS1	194.358	FALSE	-2.50555	0.0122262	0.150339	-1.59216	condition on vs pre
FP671120.5	158.134	FALSE	-2.50516	0.0122395	0.150363	-9.58825	condition on vs pre
MARCKSL1	13745.8	FALSE	2.5051	0.0122415	0.150363	0.818049	condition on vs pre
C14orf132	2037	FALSE	2.50376	0.0122883	0.150855	1.08247	condition on vs pre
TRABD2A	186.555	FALSE	-2.50292	0.0123174	0.151131	-1.69924	condition on vs pre
SRRM2	75058.5	FALSE	2.50272	0.0123245	0.151134	1.04872	condition on vs pre
MPDZ	1643.36	FALSE	-2.50144	0.0123688	0.151595	-0.932714	condition on vs pre
FOLR1	72.3715	FALSE	-2.49989	0.0124233	0.15218	-3.60738	condition on vs pre
C1GALT1	737.273	FALSE	-2.49676	0.0125335	0.153447	-1.18322	condition on vs pre
AC017116.2	294.804	FALSE	2.49656	0.0125404	0.153448	1.22522	condition on vs pre
SHD	31.8065	FALSE	-2.49631	0.0125494	0.153474	-5.64706	condition on vs pre
ZNF213-AS1	1178.95	FALSE	2.49603	0.012559	0.153508	0.979199	condition on vs pre
PSTPIP1	285.063	FALSE	-2.49495	0.0125974	0.15381	-1.64901	condition on vs pre
SPECC1L-ADORA2A	24.2731	FALSE	2.49512	0.0125915	0.15381	5.82724	condition on vs pre
AL732372.3	1719.61	FALSE	2.49436	0.0126184	0.153926	1.48105	condition on vs pre
ICAM2	727.602	FALSE	-2.49416	0.0126256	0.153926	-1.41647	condition on vs pre
TTBK1	49.2044	FALSE	-2.49411	0.0126275	0.153926	-3.57127	condition on vs pre
PLEKHN1	322.885	FALSE	2.49391	0.0126346	0.15393	1.79905	condition on vs pre
AC024361.1	205.384	FALSE	2.49332	0.0126555	0.153946	2.35151	condition on vs pre
AL121992.3	21.5819	FALSE	-2.49329	0.0126565	0.153946	-3.43068	condition on vs pre
ATG9B	457.908	FALSE	2.49344	0.0126511	0.153946	3.06757	condition on vs pre
PDIA5	1368.08	FALSE	-2.4929	0.0126706	0.154034	-1.09307	condition on vs pre
IGF2BP2	315.698	FALSE	-2.49237	0.0126895	0.154181	-1.71112	condition on vs pre
CCL15	79.6877	FALSE	-2.49137	0.0127251	0.15453	-2.96319	condition on vs pre
PERM1	168.229	FALSE	2.49068	0.0127498	0.154746	3.47946	condition on vs pre
AC013726.1	112.48	FALSE	2.48974	0.0127836	0.154998	3.01855	condition on vs pre
IGKV1D-13	57.9547	FALSE	-2.48972	0.0127844	0.154998	-4.15223	condition on vs pre
ADORA2A	1710.24	FALSE	2.4893	0.0127996	0.155016	1.15123	condition on vs pre
DDO	193.539	FALSE	-2.48947	0.0127934	0.155016	-1.56494	condition on vs pre
PCDHAC1	54.2795	FALSE	-2.48906	0.012808	0.155034	-3.6677	condition on vs pre
PLCD3	1429.26	FALSE	2.48824	0.0128378	0.155311	1.42019	condition on vs pre
COL4A4	203.771	FALSE	-2.48633	0.0129068	0.156009	-2.58021	condition on vs pre
METTL2B	2288.52	FALSE	2.48626	0.0129093	0.156009	1.09384	condition on vs pre
GPAT3	181.351	FALSE	-2.48544	0.0129392	0.156202	-2.15839	condition on vs pre
ZNF783	1911.26	FALSE	2.48548	0.0129376	0.156202	1.46576	condition on vs pre
ARMH1	467.759	FALSE	-2.48475	0.0129644	0.156322	-2.17281	condition on vs pre
FCN1	558.61	FALSE	-2.48459	0.0129701	0.156322	-2.11193	condition on vs pre
MEGF6	4717.59	FALSE	2.4848	0.0129623	0.156322	1.18937	condition on vs pre
LINC01002	3164.14	FALSE	2.48439	0.0129774	0.156327	1.50574	condition on vs pre
CU639417.5	46.4281	FALSE	2.48393	0.0129943	0.156447	4.48274	condition on vs pre
RHOT2	11447.1	FALSE	2.48301	0.0130276	0.15668	0.810289	condition on vs pre
UPK3BL1	2408.01	FALSE	2.4832	0.0130207	0.15668	0.913646	condition on vs pre
MSANTD4	649.796	FALSE	-2.48243	0.0130489	0.156852	-1.02876	condition on vs pre
ORMDL3	6778.56	FALSE	-2.48219	0.0130576	0.156873	-0.834451	condition on vs pre
AL627309.7	33.1048	FALSE	2.4814	0.0130868	0.156963	5.17951	condition on vs pre
ARHGAP15	332.271	FALSE	-2.48149	0.0130833	0.156963	-2.04686	condition on vs pre
LRRC55	65.2149	FALSE	-2.48146	0.0130847	0.156963	-2.42228	condition on vs pre
VWCE	247.89	FALSE	-2.48123	0.013093	0.156963	-1.45516	condition on vs pre
C2orf27A	830.182	FALSE	2.481	0.0131013	0.156978	1.3961	condition on vs pre
CREB5	214.194	FALSE	-2.48039	0.0131237	0.157163	-1.57681	condition on vs pre
DDX11	3074.17	FALSE	2.47988	0.0131427	0.157247	0.891717	condition on vs pre
PARP14	3786.25	FALSE	-2.47982	0.0131447	0.157247	-0.959233	condition on vs pre
LINC02535	44.7214	FALSE	-2.47919	0.0131682	0.157442	-4.07258	condition on vs pre
PDE4B	564.67	FALSE	-2.479	0.0131751	0.157442	-1.33492	condition on vs pre
AC108863.1	37.0426	FALSE	-2.47667	0.0132613	0.158389	-6.31755	condition on vs pre
PRTFDC1	212.066	FALSE	-2.47486	0.013329	0.158944	-1.38467	condition on vs pre
SAMSN1	287.249	FALSE	-2.47519	0.0133167	0.158944	-1.2314	condition on vs pre
SH3GLB2	13657.9	FALSE	2.47499	0.013324	0.158944	1.03134	condition on vs pre
ITGA11	2294.92	FALSE	2.47381	0.0133681	0.159326	1.48854	condition on vs pre
ADAMTS4	1076.51	FALSE	-2.47322	0.01339	0.159437	-1.19306	condition on vs pre
MXRA8	7778.65	FALSE	2.47318	0.0133916	0.159437	1.19881	condition on vs pre
PIK3CG	265.223	FALSE	-2.47226	0.013426	0.159762	-1.49389	condition on vs pre
CASP4	1593.57	FALSE	-2.46711	0.0136209	0.161995	-1.05708	condition on vs pre
AC073548.1	1158.18	FALSE	2.46652	0.0136432	0.162174	0.946759	condition on vs pre
MDC1	3093.43	FALSE	2.46502	0.0137006	0.16277	0.977815	condition on vs pre
AC126755.1	3029	FALSE	2.46438	0.0137249	0.162973	2.13811	condition on vs pre
CD8B	116.401	FALSE	-2.46315	0.0137722	0.163448	-1.92446	condition on vs pre
AC007666.1	79.6128	FALSE	-2.46247	0.0137983	0.163618	-1.89455	condition on vs pre
IGHV4-34	30.1909	FALSE	-2.46202	0.0138156	0.163618	-5.23561	condition on vs pre
RHPN1	8105.35	FALSE	2.46236	0.0138025	0.163618	1.05017	condition on vs pre
SLC35C1	1251.43	FALSE	-2.4621	0.0138128	0.163618	-1.12097	condition on vs pre
AL592211.1	61.2629	FALSE	2.46086	0.0138603	0.163835	3.82041	condition on vs pre
HEPACAM	60.492	FALSE	-2.46106	0.0138528	0.163835	-4.87025	condition on vs pre
MED13	3415.36	FALSE	2.46126	0.0138448	0.163835	0.890703	condition on vs pre
TIE1	1690.37	FALSE	-2.46079	0.013863	0.163835	-0.876561	condition on vs pre
DNPH1	1412.99	FALSE	-2.45957	0.0139103	0.164192	-1.00138	condition on vs pre
GLIPR1	1018.56	FALSE	-2.45945	0.0139152	0.164192	-0.941953	condition on vs pre
NPIPB5	16362	FALSE	2.45961	0.0139087	0.164192	1.18763	condition on vs pre
SIRPG	55.9594	FALSE	-2.45901	0.0139319	0.164303	-2.36786	condition on vs pre
AC069209.2	93.5806	FALSE	-2.45705	0.0140082	0.164727	-2.17088	condition on vs pre
ARSB	623.959	FALSE	-2.45727	0.0139997	0.164727	-1.07173	condition on vs pre
CLBA1	1606.8	FALSE	2.45686	0.0140157	0.164727	0.921371	condition on vs pre
GSTM5	379.223	FALSE	-2.45681	0.0140176	0.164727	-2.33149	condition on vs pre
LAMC2	449.019	FALSE	-2.45677	0.0140192	0.164727	-1.61339	condition on vs pre
MAPK8IP1P2	22.3025	FALSE	-2.45702	0.0140096	0.164727	-7.17704	condition on vs pre
SHC2	1591.7	FALSE	-2.45785	0.013977	0.164727	-1.31414	condition on vs pre
AL031602.1	421.174	FALSE	2.45634	0.0140362	0.164841	1.30241	condition on vs pre
ITGB2-AS1	341.484	FALSE	-2.45601	0.0140488	0.164902	-1.49755	condition on vs pre
AP006621.4	32.911	FALSE	2.45508	0.0140852	0.165234	3.4559	condition on vs pre
TCP10L	99.322	FALSE	-2.45492	0.0140917	0.165234	-2.48712	condition on vs pre
RBM20	360.19	FALSE	2.4546	0.0141041	0.165293	1.79514	condition on vs pre
ESRP2	6324.66	FALSE	2.45428	0.0141168	0.165356	1.1584	condition on vs pre
CRCT1	20.9774	FALSE	-2.45397	0.014129	0.165412	-5.31557	condition on vs pre
CHI3L2	72.3749	FALSE	-2.45369	0.0141399	0.165454	-2.62465	condition on vs pre
TCF4	3321.79	FALSE	2.45204	0.014205	0.166129	0.894568	condition on vs pre
AC120057.2	147.803	FALSE	2.45147	0.0142274	0.166245	9.57961	condition on vs pre
SMAD3	3342.82	FALSE	2.45141	0.0142297	0.166245	0.9576	condition on vs pre
MOXD1	571.201	FALSE	-2.45098	0.0142469	0.166359	-1.88001	condition on vs pre
ZNF500	1483.78	FALSE	2.45033	0.0142727	0.166574	1.08805	condition on vs pre
LINC01087	1929.47	FALSE	2.4497	0.0142974	0.166776	1.57171	condition on vs pre
RIMS4	1686.51	FALSE	2.44823	0.0143559	0.167372	1.49504	condition on vs pre
SYS1-DBNDD2	117.605	FALSE	2.44683	0.014412	0.167938	3.81902	condition on vs pre
ABCA5	1536.46	FALSE	-2.44566	0.0144589	0.168049	-0.940928	condition on vs pre
CCDC28A	768.474	FALSE	-2.44574	0.0144554	0.168049	-0.965674	condition on vs pre
CCDC9	2274.75	FALSE	2.44596	0.0144467	0.168049	0.97351	condition on vs pre
NKX3-2	93.5241	FALSE	2.44585	0.0144511	0.168049	4.29264	condition on vs pre
SUCNR1	110.134	FALSE	-2.44582	0.0144524	0.168049	-2.06161	condition on vs pre
HCLS1	1587.84	FALSE	-2.44519	0.0144774	0.168177	-1.00456	condition on vs pre
ZNF33B	2015.12	FALSE	2.44434	0.0145116	0.168488	0.918891	condition on vs pre
PSAT1	515.885	FALSE	-2.44371	0.0145372	0.168698	-2.46325	condition on vs pre
HDAC6	4234.1	FALSE	-2.44296	0.0145672	0.168959	-0.845706	condition on vs pre
TMEM8B	2092.07	FALSE	2.44196	0.0146076	0.169252	0.847277	condition on vs pre
ZMAT4	49.0585	FALSE	2.44198	0.0146069	0.169252	4.73888	condition on vs pre
PLXNA3	6663.63	FALSE	2.44166	0.01462	0.169309	1.41446	condition on vs pre
RAC2	662.931	FALSE	-2.44134	0.0146327	0.169368	-1.21921	condition on vs pre
PTGER4	309.044	FALSE	-2.44035	0.014673	0.169748	-1.36974	condition on vs pre
GTF2IP20	2083.35	FALSE	2.44006	0.0146848	0.169796	1.11369	condition on vs pre
AC004160.1	49.9667	FALSE	-2.43948	0.0147084	0.169982	-2.65572	condition on vs pre
AC002310.5	148.105	FALSE	2.43866	0.0147417	0.169999	3.2732	condition on vs pre
CSAD	7277.25	FALSE	2.43852	0.0147476	0.169999	1.0543	condition on vs pre
POGZ	7981.33	FALSE	2.43865	0.0147422	0.169999	0.874949	condition on vs pre
UGT1A6	197.9	FALSE	-2.43919	0.0147202	0.169999	-9.50504	condition on vs pre
ZNF320	791.475	FALSE	2.43892	0.0147314	0.169999	1.00304	condition on vs pre
MCCC1	2325.87	FALSE	-2.43786	0.0147746	0.170222	-1.49039	condition on vs pre
AC093525.7	349.175	FALSE	2.43682	0.014817	0.170536	1.19056	condition on vs pre
IL7	160.078	FALSE	-2.43691	0.0148134	0.170536	-2.35818	condition on vs pre
SPDYE2	271.695	FALSE	2.43657	0.0148274	0.170569	2.41266	condition on vs pre
NRXN2	233.221	FALSE	-2.43554	0.0148697	0.170968	-1.71045	condition on vs pre
AP000523.1	136.173	FALSE	2.43415	0.0149266	0.171534	3.13046	condition on vs pre
LGMN	5287.67	FALSE	-2.43378	0.0149422	0.171625	-0.845978	condition on vs pre
HLA-DQA1	1567.53	FALSE	-2.43321	0.0149655	0.171805	-1.00203	condition on vs pre
GAS8	2281.82	FALSE	2.43239	0.0149994	0.172019	1.07905	condition on vs pre
RASA4	2235.41	FALSE	2.43245	0.0149973	0.172019	1.1044	condition on vs pre
AL133216.2	1123.98	FALSE	2.43182	0.0150233	0.172029	1.07081	condition on vs pre
LAIR1	1269.14	FALSE	-2.43184	0.0150223	0.172029	-0.94693	condition on vs pre
TRIM62	906.171	FALSE	2.43197	0.0150169	0.172029	0.931243	condition on vs pre
FUCA1	2737.32	FALSE	-2.43118	0.0150498	0.172245	-0.823235	condition on vs pre
LINC02544	52.9812	FALSE	2.43087	0.0150625	0.172303	4.27545	condition on vs pre
IL11RA	766.861	FALSE	-2.42948	0.0151203	0.17286	-1.31369	condition on vs pre
MTAP	1424.91	FALSE	-2.42933	0.0151266	0.17286	-1.08537	condition on vs pre
AC087164.1	84.1156	FALSE	2.42875	0.015151	0.172963	1.88143	condition on vs pre
FCRL6	44.8847	FALSE	-2.42887	0.0151458	0.172963	-2.80906	condition on vs pre
IGKV1-12	214	FALSE	-2.42851	0.015161	0.17299	-2.88467	condition on vs pre
PLCH2	407.684	FALSE	-2.42821	0.0151734	0.173006	-1.68034	condition on vs pre
TNFRSF1B	1164.73	FALSE	-2.42811	0.0151778	0.173006	-0.912474	condition on vs pre
KLF5	1215.72	FALSE	-2.42783	0.0151894	0.17305	-1.74759	condition on vs pre
AC126755.6	257.683	FALSE	2.42721	0.0152153	0.173169	3.48508	condition on vs pre
ZFP41	1165.94	FALSE	2.42732	0.0152109	0.173169	1.11478	condition on vs pre
FOLH1	263.65	FALSE	-2.427	0.0152241	0.173182	-1.54465	condition on vs pre
KCNT2	103.575	FALSE	-2.4261	0.0152621	0.173472	-2.31532	condition on vs pre
SEMA4B	4339.16	FALSE	2.42603	0.015265	0.173472	0.898557	condition on vs pre
HGF	421.898	FALSE	-2.42566	0.0152807	0.173562	-1.54251	condition on vs pre
AC018362.2	35.3624	FALSE	-2.42541	0.0152911	0.173592	-6.31048	condition on vs pre
AC008537.4	61.2104	FALSE	2.42504	0.0153068	0.173683	3.50262	condition on vs pre
HLA-L	851.479	FALSE	-2.42441	0.0153332	0.173736	-0.975753	condition on vs pre
NCALD	724.136	FALSE	-2.42438	0.0153346	0.173736	-1.30983	condition on vs pre
PRR18	49.8079	FALSE	-2.42458	0.0153262	0.173736	-3.45784	condition on vs pre
FGGY	936.496	FALSE	-2.42353	0.0153705	0.174054	-1.83464	condition on vs pre
RN7SL381P	37.8393	FALSE	2.42313	0.0153876	0.17416	3.78989	condition on vs pre
AC000032.1	44.9214	FALSE	2.42278	0.0154023	0.174211	6.73985	condition on vs pre
HEXD-IT1	209.464	FALSE	2.42265	0.0154076	0.174211	1.6203	condition on vs pre
LINC01694	499.089	FALSE	2.42085	0.0154844	0.174992	2.39549	condition on vs pre
SIGLEC1	1456.94	FALSE	-2.42046	0.015501	0.175092	-1.26559	condition on vs pre
STMN3	4436.54	FALSE	2.41968	0.0155341	0.175377	0.833887	condition on vs pre
FOXP3	177.501	FALSE	-2.41929	0.015551	0.17548	-1.65694	condition on vs pre
ELOCP33	22.2963	FALSE	2.41897	0.0155644	0.175543	4.22126	condition on vs pre
GPR37	192.21	FALSE	-2.41724	0.0156388	0.176294	-2.19973	condition on vs pre
DNAJB4	482.401	FALSE	-2.41682	0.015657	0.17641	-1.16199	condition on vs pre
AC018755.2	26.5335	FALSE	-2.41643	0.0156736	0.176509	-6.74039	condition on vs pre
AC087741.1	1224.61	FALSE	2.41613	0.0156863	0.176563	1.11933	condition on vs pre
SC5D	1844.64	FALSE	-2.41583	0.0156995	0.176623	-0.942805	condition on vs pre
CTSZ	11789.9	FALSE	-2.41544	0.0157164	0.176725	-0.867342	condition on vs pre
[truncated: 29,697 more rows]
