# Supplementary material for: The Oncogenic PI3K-Induced Transcriptomic Landscape Reveals Key Functions in Splicing and Gene Expression Regulation
Source: Oxford University Press journal article supplement (doi:10.1158/0008-5472.can-22-0446), 2022-04-20
Supplement: can-22-0446-sst11.xlsx [file can-22-0446-sst11.xlsx]

## Sheet: Table S11. C2
Description	setSize	enrichmentScore	NES	pvalue	p.adjust	qvalues	rank	leading_edge	core_enrichment
HSIAO_LIVER_SPECIFIC_GENES	248	0.909955	4.4465	0.000247709	0.00110632	0.000523932	3275	tags=91%, list=7%, signal=85%	CYP2D7/ACSL1/CBS/LCAT/ABCC2/GHR/POR/MST1/AGXT/GPT/CES2/ACAA1/SLC10A1/CYP2C18/HPX/CFI/SERPIND1/TDO2/GCH1/HAL/ALDH2/CYP4A11/CYP2C9/APOE/SLC39A14/KLKB1/SERPINF1/AGT/CDH2/SLC38A3/SHMT1/NAT2/PROC/C5/BHMT/ASS1/PCK2/SERPING1/F12/CFH/ASGR1/AFM/PON3/PCSK6/FMO3/CYP2A6/ACAA2/ANG/HGFAC/SULT2A1/TST/PROS1/CYP4F3/TAT/CFHR4/MBL2/CYP27A1/CAT/HGD/APOF/F11/PZP/CPN2/CES1/C3/FGG/GJB1/SORD/FMO5/GATM/C1R/C8G/SDS/F10/DP…
CAIRO_HEPATOBLASTOMA_DN	265	0.868964	4.27332	0.00024975	0.00110632	0.000523932	4858	tags=86%, list=10%, signal=78%	CYP2D7/ACSL1/CBS/SARDH/LCAT/GHR/ADGRA3/AGXT/ABCB11/CYP3A5/ACAA1/SLC10A1/HAAO/PFKFB1/RDH16/CYP2C18/CLEC4M/HPX/TDO2/GCH1/IGFALS/HAL/ETFDH/SLC37A4/SLC22A1/HSD17B6/ACADS/SLC46A3/ACACB/SLC27A2/KDM8/SHMT1/NAT2/SLC38A4/NR1I2/CYP1A2/ASS1/PCK2/C1RL/SERPING1/GPD1/GPLD1/AQP3/PXDC1/CYP2A6/ACAA2/MASP2/ANG/HGFAC/ACADM/ZGPAT/CYP4F3/VNN1/CFHR4/GNMT/HGD/APOF/F11/ABHD2/PZP/DHODH/TFR2/UGP2/N4BP2L1/TENM1/NR1I3/C1R/C…
CHIANG_LIVER_CANCER_SUBCLASS_PROLIFERATION_DN	179	0.905194	4.23608	0.000244798	0.00110632	0.000523932	2854	tags=89%, list=6%, signal=84%	COL18A1/POR/BHMT2/AGXT/MPDZ/GPT/ABCB11/NAGS/CES2/SLC10A1/HAAO/PFKFB1/RDH16/CCL16/LDHD/CYP4A22/ECHDC2/ETFDH/MYO1B/CYP4A11/TTPA/SLC22A1/ALDH5A1/HSD17B6/CYP8B1/MLYCD/CYP2C9/SLC46A3/SERPINA10/SLC38A3/NAT2/SLC38A4/NR1I2/CYP1A2/EHHADH/ANGPTL3/BHMT/AQP9/SERPING1/GPLD1/F12/CYP3A43/SELENOO/AFM/FMO3/GPT2/MASP2/ALDH1L1/PDK4/SULT2A1/TST/DEPDC7/ECM2/CYP4F3/TAT/APOA5/CYP27A1/CAT/SLC16A2/ABCG8/TFR2/NR1I3/ACSM5/…
HOSHIDA_LIVER_CANCER_SUBCLASS_S3	266	0.848535	4.17622	0.000249377	0.00110632	0.000523932	4212	tags=77%, list=8%, signal=71%	ACSL1/COL18A1/LCAT/GHR/IL6R/CNGA1/CD302/AGXT/GPT/SLC10A1/HAAO/SLC35D1/TDO2/GCH1/ALDH2/GCKR/CYP2C9/ACADS/KLKB1/AMT/SHMT1/EHHADH/ALDH4A1/BHMT/ASS1/PCK2/SLC7A2/SERPING1/CFH/ASGR1/PON3/SLC6A1/ACAA2/PDK4/SULT2A1/ACADM/TST/PROS1/CYP27A1/CAT/CXCL2/ACO1/SLC16A2/HGD/F11/ABHD2/CES1/EGFR/FGG/GJB1/SLC9A3R2/C1R/SDS/PGM1/PKLR/F5/ITIH3/ARG1/C1S/RARRES2/FGB/RGN/FOXO1/ABCB4/CPB2/ASL/BDH1/ADH6/RIDA/PAH/PPP2R1B/ALD…
LEE_LIVER_CANCER_SURVIVAL_UP	184	0.855029	4.02689	0.000242072	0.00110632	0.000523932	3417	tags=76%, list=7%, signal=71%	ACSL1/MLXIPL/ABCC2/IL6R/MST1/MPDZ/C2/DIO1/CYP2D6/CES2/CCL16/SLC35D1/KHK/SERPIND1/ECHDC2/TTPA/HSD17B6/ACADS/FBXO31/AMT/SERPINF1/SLC38A3/EHHADH/ALDH4A1/ABCG5/COBLL1/CDHR5/AQP9/SERPING1/F12/ASGR1/PCSK6/FMO3/MASP2/ALDH1L1/SULT2A1/DEPDC7/APOA5/HYAL1/HGD/ABCG8/CPN2/CES1/GJB1/TRIM55/ACSM5/F10/DPYS/PKLR/TMEM176B/CYP3A4/A1CF/PIPOX/MTSS1/RGN/MSRA/PHLPP1/ABHD6/CPB2/PC/BDH1/ABCA6/CUX2/MOGAT1/PAH/SLC27A5/MYRI…
ACEVEDO_LIVER_TUMOR_VS_NORMAL_ADJACENT_TISSUE_DN	274	0.777372	3.83757	0.000250376	0.00110632	0.000523932	6471	tags=70%, list=13%, signal=61%	MLXIPL/LCAT/GHR/ANPEP/LIPG/IGF2/PROZ/CYP3A5/ACAA1/IGFALS/GCKR/SLC22A1/CYP2C9/ACADS/ATF5/TRPM8/AGMAT/KLKB1/SLC19A3/CDH2/NAT2/CYP1A2/PROC/FTCD/C1RL/GPD1/ASPDH/F12/CLUH/AFM/TMEM86B/HGFAC/ANGPTL8/VNN1/MFSD2A/C3/ERLIN1/MT1X/FAM99A/ITIH3/ARG1/NR0B2/SLC25A47/DGAT2/GCGR/CPED1/IDO2/F9/MT1M/THRSP/PINK1/GLUD1/PON1/OGDHL/PNMA6A/INHBE/NDRG2/HDAC6/ACADVL/RAB17/C19orf66/PLIN2/EPHX2/TKFC/MYO7A/MT1F/ATOH8/FGL1/IG…
OHGUCHI_LIVER_HNF4A_TARGETS_DN	161	0.812805	3.75523	0.000238834	0.00110632	0.000523932	3932	tags=71%, list=8%, signal=66%	CYP2D7/XYLB/SARDH/MPDZ/PROZ/DIO1/CYP2D6/CES2/HAAO/AADAT/RDH16/CFI/ALDH8A1/CYP8B1/AGMAT/SERPINF1/PGLYRP2/ASPDH/F12/ASGR1/PXDC1/CLDN1/SLCO2B1/SULT2A1/MBL2/MFSD2A/F11/PZP/CPN2/EGFR/TFR2/NR1I3/GJB2/C8G/CA5A/LIPC/IL1RAP/RARRES2/CYP4V2/SLC47A1/SLC30A10/GCGR/BDH1/ENTPD8/SLC27A5/CFHR1/F13B/SMLR1/CIDEB/CYP7B1/ABCC6/PRODH2/ABAT/RDH5/BAAT/C8B/GLYAT/QPRT/OTC/PCYT2/C4BPA/APOM/TKFC/NAT8/MASP1/SLC17A3/PLA2G12B/…
WOO_LIVER_CANCER_RECURRENCE_DN	78	0.911802	3.73821	0.000229463	0.00110632	0.000523932	2960	tags=88%, list=6%, signal=83%	PLIN1/SARDH/POR/ACSL5/GPT/ACAA1/TTPA/PCK2/SERPING1/CYP3A43/MASP2/ALDH1L1/PPARA/SULT2A1/CYP4F3/CYP27A1/CAT/HGD/APOL6/HNF4A/CA5A/PIPOX/PC/ADH6/PAH/GLUD1/HSD17B4/CPS1/PLPP3/CYP4F12/PCYT2/C4BPA/EPHX2/CYP2J2/CYP4F2/PEMT/ACOX2/FMO4/BPHL/ECHS1/GOT2/CSAD/MTTP/ALDH3A2/ACADSB/DAO/C4BPB/ADH5/CRYL1/ACY1/APOC4/APOC3/MAT1A/ALAS1/PCTP/SLC25A15/EPHX1/GCDH/QDPR/HPD/CYP2E1/DCXR/ADH1B/SLC2A2/G6PC/AASS/SLC2A9/PAOX/C…
CAIRO_LIVER_DEVELOPMENT_DN	218	0.773191	3.71541	0.000246975	0.00110632	0.000523932	3443	tags=59%, list=7%, signal=55%	ACSL1/CBS/COL18A1/LCAT/CD302/MST1/HAAO/SERPIND1/SLC37A4/TTPA/GLDC/APOE/SERPINA10/KLKB1/SERPINF1/AGT/SLC38A3/C5/ANGPTL3/H6PD/BHMT/PCK2/AQP9/SERPING1/GPLD1/F12/AFM/PON3/ACAA2/CLDN1/CLPX/ALDH1L1/PPARA/HGFAC/ACADM/TST/SEMA4G/GNMT/CYP27A1/SLC16A2/APOF/LRP1/F11/CES1/C3/FGG/TFR2/GJB1/PHYH/LBP/C8G/PGM1/F10/DPYS/CA5A/LIPC/ITIH3/ARG1/PIPOX/FGA/FGB/ABCA8/CPB2/BDH1/RIDA/SLC27A5/ALDH1B1/HPN/PINK1/ABCC6/HMGCS2…
SU_LIVER	58	0.918793	3.55239	0.000227428	0.00110632	0.000523932	2360	tags=88%, list=5%, signal=84%	GPT/RDH16/CCL16/SERPIND1/IGFALS/GCKR/RXRA/SLC22A1/CYP1A2/F12/AFM/FMO3/MASP2/TAT/CFHR4/MBL2/APOF/CPN2/DHODH/TFR2/LIPC/ARG1/GCGR/CFHR2/HABP2/AKR1C4/F9/CFHR1/CPN1/CYP4F11/SEC14L2/CPS1/CTH/SLC25A20/SLC6A12/LPA/SPP2/SLC25A13/C8A/GALK1/HAO1/UGT2B4/C9/SERPINC1/C4BPB/APOB/CYP3A7/SAA4/APCS/ITIH2/LECT2
ACEVEDO_NORMAL_TISSUE_ADJACENT_TO_LIVER_TUMOR_DN	353	0.696915	3.54175	0.000254582	0.00110632	0.000523932	6325	tags=52%, list=13%, signal=46%	CBS/ABCC2/OAF/UPB1/HAAO/RDH16/CCL16/IGFALS/RXRA/ATF5/AGMAT/SLC19A3/HEPACAM/AGT/SHMT1/ANGPTL3/DBH/SH3BGRL2/TMPRSS6/TSHZ2/GPD1/FMO3/GPT2/BCO2/TST/TMEM82/GNMT/FUOM/ERLIN1/GBP7/LRP5/F10/CFHR3/DGAT2/ABHD6/ZCCHC14/ADH6/MAMDC4/CAPN5/GLUD1/VAV2/HPR/LPIN2/GPR88/INHBE/RETSAT/CYP39A1/MAOA/ALPL/OSBP/RDH5/SAMD4A/PRG4/OTC/NUCB1/IGFBP4/GSTA1/PCOLCE2/NNMT/BPHL/GOT2/MYOM1/CADM1/DIAPH1/DHRS1/IDNK/CENPV/ADI1/TTC39C…
ANDERSEN_LIVER_CANCER_KRT19_DN	75	0.866945	3.53015	0.000229043	0.00110632	0.000523932	6127	tags=95%, list=12%, signal=83%	ACSL5/GPT/DIO1/PFKFB1/KHK/SERPIND1/ETFDH/SERPING1/AFM/ANG/APOA5/GNMT/TFR2/ALAD/C8G/DPYS/PKLR/SLC41A2/CYP3A4/UGT2B10/PC/CIDEB/ABCC6/HMGCS2/LEAP2/SLC25A25/RETSAT/HAO2/BAAT/CPT2/CYP4F2/AMACR/PEMT/ALDH1A1/PGRMC1/AOX1/GRHPR/TMEM140/SLC22A7/CRYL1/AKR7A3/UGT2B15/ITIH1/PTGR1/EPHX1/SAA4/HSD3B7/AK3/HPD/ALDOB/SLC31A1/SEL1L/G6PC/PCYOX1/CPQ/ADRA1B/GPX2/PTMS/HADH/SERPINA3/TNIP1/DECR2/MGST2/PDE2A/ARMC5/CEBPB/UG…
CHIANG_LIVER_CANCER_SUBCLASS_UNANNOTATED_UP	86	0.820305	3.42851	0.000231107	0.00110632	0.000523932	6857	tags=80%, list=14%, signal=69%	PROZ/SLC25A18/CYP4A11/SLC39A14/CYP1A2/BHMT/LMO7/FTCD/PCSK6/HGFAC/ARHGEF10L/CYP2A7/KIFC3/F11/CYP2C19/MUC20/PALM3/SLC22A3/DPYS/CFHR3/LEPR/GLS2/SLC25A47/SORBS2/IDO2/BACH2/ACOX1/NSUN6/RAPGEF2/SORL1/TNFSF14/LPA/ABCA9/LINC01554/RNF125/RORA/SIK3/TPCN2/PLG/FCN3/HSDL2/MBNL2/PIK3R1/ETS2/LRP6/NAMPT/CP/ELL2/DOCK5/GSDMB/GSAP/ARNT/ZFAND5/LRRFIP2/DUSP16/ID2/GPAT3/TNRC6A/SMIM14/CPEB4/SRSF4/PITPNB/MAP3K13/CYP2B7P…
KEGG_COMPLEMENT_AND_COAGULATION_CASCADES	69	0.847929	3.39342	0.000228519	0.00110632	0.000523932	2535	tags=65%, list=5%, signal=62%	C2/CFI/SERPIND1/KLKB1/PROC/C5/SERPING1/F12/CFH/MASP2/PROS1/MBL2/F11/C3/FGG/C1R/C8G/F10/F5/C1S/FGA/FGB/F7/CPB2/F9/CFB/F13B/C4B/C8B/TFPI/C4BPA/SERPINF2/MASP1/C8A/C9/SERPINC1/C4A/SERPINA5/C4BPB/C6/KNG1/F2/PLG/SERPINA1/A2M
YAMASHITA_LIVER_CANCER_STEM_CELL_DN	76	0.829577	3.38625	0.000229674	0.00110632	0.000523932	2011	tags=68%, list=4%, signal=66%	ACSL1/ACSL5/ABCB11/CES2/SLC10A1/ALDH8A1/CYP8B1/SLC27A2/KLKB1/NR1I2/CYP1A2/ABCG5/FMO3/MASP2/ALDH1L1/SULT2A1/APOA5/F11/CES1/NR1I3/C1R/HNF4A/CYP3A4/PIK3C2G/CYP2C8/ABCB4/F9/CD14/RBP5/CYP7B1/GADD45A/ALDH6A1/MAOA/C8B/UGT2B7/GSTA1/MASP1/AOX1/FMO4/C8A/SERPINC1/C6/APOC4/UGT2B15/KNG1/CYP3A7/HRG/SAA4/APCS/CYP7A1/FKBP5/PPARGC1A
BOYAULT_LIVER_CANCER_SUBCLASS_G123_DN	50	0.90099	3.384	0.000228833	0.00110632	0.000523932	3236	tags=92%, list=6%, signal=86%	PROZ/ACAA1/CFI/ECHDC2/ETFDH/MLYCD/NR1I2/PCK2/ACAA2/ECM2/HYAL1/SLC16A2/ACSM5/FGA/SLC28A1/RGN/MSRA/RIDA/CUX2/SLC27A5/ACADL/PRODH2/GABARAPL1/SEC14L2/EPHX2/SLC6A12/ST3GAL6/RCL1/MTHFD1/GRHPR/GOT2/HAO1/ITIH4/FYN/MAT1A/ALAS1/SLC25A15/CBR4/GCDH/HPD/DCXR/ASPA/ETNK2/HADH/EXPH5/FAS
CAIRO_HEPATOBLASTOMA_CLASSES_DN	214	0.701914	3.36596	0.000245399	0.00110632	0.000523932	6133	tags=57%, list=12%, signal=50%	COL18A1/GHR/ACSL5/SLC10A1/KHK/ALDH2/HSD17B6/CYP2C9/AQP9/SERPING1/AFM/FMO3/SLC6A1/TST/SLCO1B3/CAT/HGD/PHYH/GATM/C1R/DAPK1/ENPEP/C1S/RARRES2/ABHD6/ABCA6/TUT7/ADH6/SLC27A5/MYRIP/CYP2B6/CTXND1/HSD11B1/PON1/GABARAPL1/TBC1D2B/GLYAT/IGF1/CTSO/LIMS2/IL1R1/SLC30A1/AOX1/FMO4/MFAP3L/ZCCHC24/AADAC/C8A/ALDH3A2/DAO/MICU1/CYP1A1/ANXA10/TK2/UGT2B4/ZBTB20/CD81/ITIH4/DNASE1L3/PEBP1/APOC4/ALAS1/ECM1/GFOD1/TNS2/PTPR…
VILLANUEVA_LIVER_CANCER_KRT19_DN	68	0.840784	3.35133	0.00022899	0.00110632	0.000523932	4121	tags=68%, list=8%, signal=62%	XYLB/POR/MPDZ/ABCB11/METTL7A/NR1I2/CDHR5/GCLC/APOA5/LRP1/N4BP2L1/NR1I3/TM6SF2/HNF4A/ABCA8/RGN/ABCA6/ALDH1B1/ACMSD/RBP5/PINK1/GADD45A/METTL7B/RETSAT/ALPL/GLYAT/IVD/CPT2/C4BPA/ENPP7/SDC1/C9/ACY1/SHBG/ACY3/PDK2/NGEF/SLC1A1/HIBADH/VXN/CRAT/DDT/CBR1/PNPO/RMDN3/LARP4
BOYAULT_LIVER_CANCER_SUBCLASS_G3_DN	53	0.874657	3.32069	0.000228102	0.00110632	0.000523932	3630	tags=83%, list=7%, signal=77%	COL18A1/SARDH/CD302/ALDH5A1/TTC38/SERPINF1/SLC38A3/TMPRSS6/SERPING1/GPLD1/CFH/PCSK6/TST/CYP27A1/CPN2/ALAD/CA5A/TMEM176B/RARRES2/F7/CPB2/MARC2/SORBS2/PON1/ACADVL/SLC25A20/MASP1/FMO4/ECHS1/ZCCHC24/DHTKD1/ACAT1/CRYL1/ASGR2/TF/KNG1/TNS2/GGCX/SLC2A2/GAMT/PIK3R1/IFIT1/MGMT/SMARCA2
KIM_LIVER_CANCER_POOR_SURVIVAL_DN	43	0.910513	3.31935	0.000227428	0.00110632	0.000523932	3857	tags=93%, list=8%, signal=86%	MST1/ACSL5/KHK/SERPINA10/COBLL1/AQP9/SULT2A1/CYP27A1/GJB1/HNF4A/F10/PKLR/F5/MTSS1/RGN/ADH6/PAH/CYP4F12/EPHX2/CYP2J2/SERPINF2/CDO1/SLC30A1/BPHL/SLC22A7/SERPINC1/C4BPB/CRYL1/APOC3/IQGAP2/PLG/GPHN/ADH1B/SLC2A2/RNASE4/LECT2/C1orf115/CRAT/ITPR2/CYB5A
SHETH_LIVER_CANCER_VS_TXNIP_LOSS_PAM4	280	0.670589	3.31792	0.000249875	0.00110632	0.000523932	6354	tags=51%, list=13%, signal=45%	ACSL1/CBS/SARDH/GHR/DMGDH/BHMT2/AGXT/MPDZ/CYP2D6/SLC10A1/HAAO/PBLD/AADAT/RDH16/GCH1/ALDH8A1/CYP8B1/AGMAT/BHMT/CLPX/MBL2/GNMT/SLC17A2/SLC16A2/EVA1A/N4BP2L1/NR1I3/DPYS/ENPEP/IL1RAP/CYP3A4/CYP2C8/ABHD15/CYP4V2/SLC47A1/IDO2/DPYD/NR1H4/SLC27A5/CFHR1/ATP11A/ABCC6/GAS2/HMGCS2/LEAP2/PECR/COQ8A/ADHFE1/CD1D/GABARAPL1/ABAT/ALDH6A1/BAAT/NDRG2/GLYAT/IGF1/CTH/OTC/EPHX2/CKMT2/CLEC4G/SLC6A12/GOT1/HPGD/CYP4F2/ALD…
REACTOME_BIOLOGICAL_OXIDATIONS	220	0.683161	3.28692	0.000246366	0.00110632	0.000523932	6290	tags=60%, list=12%, signal=52%	POR/CYP3A5/CYP2D6/CES2/CYP2C18/SLC35D1/AKR7L/ACSM2A/CYP4A22/ALDH2/CYP4A11/RXRA/CYP8B1/CYP2C9/NAT2/UGT1A4/CYP1A2/ACSM2B/CYP3A43/FMO3/UGT1A3/CYP2A6/SULT2A1/GCLC/CYP4F3/CYP2A7/CYP27A1/CES1/UGT1A1/UGP2/ACSM5/CYP2C19/CYP3A4/CYP2C8/UGT2B10/CYP4V2/MARC2/ADH6/NR1H4/ALDH1B1/CYP2B6/CYP7B1/SULT1E1/CYP4F11/CYP39A1/MAOA/GLYAT/UGT2B7/MAOB/CYP4F12/CYP2J2/GSTA1/CYP4F2/ALDH1A1/NNMT/UGT1A9/FDX1/BPHL/AADAC/GLYATL1/…
COULOUARN_TEMPORAL_TGFB1_SIGNATURE_DN	137	0.72372	3.27225	0.000236072	0.00110632	0.000523932	4966	tags=53%, list=10%, signal=48%	CBS/COL18A1/GPT/SERPIND1/ERRFI1/OSGIN1/GPD1/CLUH/ABCC3/DEPDC7/LRP1/GJB2/UGT2B10/DGAT2/HABP2/SORBS2/SULT1E1/CPN1/GADD45A/LPIN2/PLPP3/RAB17/PRG4/RAPGEF2/PCYT2/IGFBP4/GSTA1/HPGD/ALDH1A1/IGFBP3/SCP2/GRHPR/IDH1/SLC23A2/SLC25A13/DHRS1/TTC39C/ALDH3A2/CDA/STOM/SELENOP/RSC1A1/ENTPD5/UGT2B15/ALAS1/CYP3A7/MSMO1/HIPK2/ALDOB/GK/CXADR/NDEL1/MSRB1/C1orf115/CHKA/SLC26A1/RASSF5/SH3BP2/CHP1/GSTO1/SLC2A8/ABCB1/SLC3…
CHIANG_LIVER_CANCER_SUBCLASS_POLYSOMY7_UP	79	0.792972	3.25928	0.00023015	0.00110632	0.000523932	4516	tags=67%, list=9%, signal=61%	POR/HAAO/PFKFB1/TUBE1/IGFALS/SLC22A1/CYP2A6/MFSD2A/CYP2A7/SLC16A2/TM6SF2/MOGAT3/CLDN14/SLC25A47/SLC28A1/ABCB4/GCGR/CIDEB/AADACP1/AZGP1P2/CRYAA/GPR88/TKFC/PEMT/ANO1/LINC01018/DHRS1/DAO/PRKAG2/FCGRT/PEPD/WNK3/FNDC5/RAPGEF4/CLDN15/PYGL/RHOU/FOLH1/ADCY1/TSPAN33/MPPED1/ARMC6/COBL/SYTL4/TRIM35/MPND/SRD5A1/CHN2/NLRP11/CROT/CDHR3/PILRB/ADAMTS17
KEGG_RETINOL_METABOLISM	64	0.825353	3.2535	0.000227324	0.00110632	0.000523932	5635	tags=78%, list=11%, signal=69%	CYP3A5/RDH16/CYP2C18/CYP4A22/CYP4A11/CYP2C9/UGT1A4/CYP1A2/RDH10/CYP3A43/UGT1A3/CYP2A6/CYP2A7/UGT1A1/CYP2C19/CYP3A4/CYP2C8/UGT2B10/DGAT2/ADH6/CYP2B6/DHRS3/RETSAT/RDH5/UGT2B7/ALDH1A1/UGT1A9/ALDH1A2/CYP1A1/UGT2B4/UGT1A6/ADH5/UGT2B15/CYP3A7/ADH1A/ADH1B/UGT1A5/ADH1C/ADH4/UGT2A1/DHRS4/UGT2B11/UGT1A7/RDH11/UGT1A10/CYP26A1/DGAT1/UGT2B17/ADH7/LRAT
HOSHIDA_LIVER_CANCER_SURVIVAL_DN	112	0.732252	3.2073	0.000232072	0.00110632	0.000523932	5384	tags=57%, list=11%, signal=51%	GHR/HAAO/PFKFB1/TDO2/SLC37A4/GCKR/C5/PON3/PROS1/GJB1/PKLR/LIPC/SCG5/GCGR/HABP2/ADH6/CUX2/DST/F9/CYP2B6/IMPA1/CPN1/C8B/IGF1/POLRMT/CPOX/PCYT2/PPP1R1A/AOX1/ITPRID2/AKR1D1/DCAF11/ACSM3/SC5D/HMGCL/C9/C4BPB/ADH5/TTR/ALAS1/PCK1/PLG/PLCG2/ERCC5/GGCX/DOCK4/CTBS/TAF1C/ACOT2/BAIAP2/NAAA/ZER1/AR/CYB5A/PMM1/XPA/AKR1A1/AARS/SLC4A4/TM7SF2/ALDH9A1/ADRA2B/KCNJ3/GSTM1
SERVITJA_LIVER_HNF1A_TARGETS_DN	159	0.693084	3.19622	0.000238493	0.00110632	0.000523932	3041	tags=53%, list=6%, signal=50%	CYP2D7/PNPLA3/RDH16/CFI/IGFALS/SLC37A4/C5/FTCD/SERPING1/AFM/ALDH1L1/ANG/CHRNA4/SLCO1B3/F11/EGFR/FMO5/C1R/CA5A/SLC41A2/CLDN14/IL1RAP/CYP2C8/NR0B2/CYP4V2/CPB2/SLC30A10/HABP2/NR1H4/PAH/SCLY/F13B/CYP7B1/HSD11B1/PRODH2/SLC16A10/C8B/IGF1/ARNTL/APOM/CYP2J2/LIN7A/IGFBP4/IL1R1/CYP4F2/SLC17A3/DDC/ONECUT1/C8A/SLC22A7/SLC22A9/CLDN2/HAO1/C9/C6/CES3/PLA1A/SLC3A1/PPP1R3C/BDH2/FABP1/ITIH1/DPP4/HSD17B2/HRG/SAA4/P…
KEGG_PEROXISOME	78	0.778596	3.19209	0.000229463	0.00110632	0.000523932	6864	tags=67%, list=14%, signal=58%	ACSL1/ACSL5/AGXT/ACAA1/MLYCD/SLC27A2/EHHADH/CAT/PHYH/PIPOX/PECR/ACOX1/HAO2/BAAT/XDH/HSD17B4/EPHX2/AMACR/SCP2/ACOX2/ABCD4/IDH1/DAO/HMGCL/HAO1/MVK/PEX14/PXMP2/PEX3/ECH1/ABCD3/HACL1/ECI2/PAOX/CRAT/AGPS/CROT/DHRS4/PEX11A/DECR2/PEX19/NUDT12/GSTK1/DDO/PEX5/SOD1/PEX11G/SOD2/PEX6/PEX16/PEX12/PEX26
KEGG_DRUG_METABOLISM_CYTOCHROME_P450	71	0.79188	3.1891	0.000227169	0.00110632	0.000523932	5537	tags=72%, list=11%, signal=64%	CYP3A5/CYP2D6/CYP2C18/CYP2C9/UGT1A4/CYP1A2/CYP3A43/FMO3/UGT1A3/CYP2A6/CYP2A7/UGT1A1/FMO5/CYP2C19/CYP3A4/CYP2C8/UGT2B10/ADH6/CYP2B6/MAOA/UGT2B7/MAOB/GSTA1/UGT1A9/AOX1/FMO4/GSTA2/UGT2B4/UGT1A6/ADH5/UGT2B15/CYP3A7/ADH1A/CYP2E1/ADH1B/UGT1A5/ADH1C/ADH4/UGT2A1/MGST1/GSTO1/GSTZ1/UGT2B11/UGT1A7/GSTK1/UGT1A10/GSTM4/MGST2/UGT2B17/GSTM1/ADH7
REACTOME_FATTY_ACID_METABOLISM	177	0.680748	3.18286	0.000243191	0.00110632	0.000523932	4622	tags=49%, list=9%, signal=44%	ACSL1/ACSL5/ACAA1/PRKAB2/CYP4A22/CYP4A11/ACAD11/RXRA/CYP8B1/MLYCD/CYP2C9/ACADS/ACACB/SLC27A2/CYP1A2/EHHADH/PON3/ACAA2/ACOT12/ACADM/CYP4F3/PHYH/CYP2C19/CYP2C8/ACADL/THRSP/PON1/PECR/CYP4F11/ACOX1/MMUT/HAO2/HSD17B4/ACADVL/CPT2/MMAA/SLC25A20/EPHX2/CYP2J2/HPGD/CYP4F2/AMACR/AKR1C3/SCP2/ACBD4/ACOX2/ECHS1/ACOT13/PCCA/CPT1A/ACSM3/ACBD5/ALDH3A2/CYP1A1/PRKAG2/PCTP/PTGR1/CBR4/ACSF3/SLC27A3/ELOVL6/ELOVL2/DECR…
CHIANG_LIVER_CANCER_SUBCLASS_CTNNB1_UP	175	0.679522	3.1699	0.000243072	0.00110632	0.000523932	4796	tags=50%, list=10%, signal=46%	ACSL5/ABCB11/NAGS/TTPA/CYP8B1/HEPACAM/HLF/GPAM/AQP9/ALDH1L1/PDK4/FAM8A1/ECM2/CYP3A4/PHLPP1/ABHD6/SLC47A1/ADH6/MYRIP/KCNJ8/HSD11B1/SLC2A12/TPRG1/SLC16A10/SLC13A3/SEC14L2/ACSS3/GLYAT/CDC14B/SLC6A12/AMACR/SALL1/HOGA1/MTHFD1/AOX1/GRHPR/AADAC/SLC17A1/ACSM3/ALDH3A2/BOK/DSG1/CLDN2/CYP1A1/ZNF385B/MME/TMEM245/DPP4/IRS1/ABCG2/GPHN/HPD/CPPED1/HSDL2/CYP2E1/DCXR/C3orf85/SLCO1B1/SRD5A2/SLC25A30/SEPT4/PHYHIPL/M…
BOCHKIS_FOXA2_TARGETS	416	0.61365	3.16853	0.000258933	0.00110632	0.000523932	6928	tags=46%, list=14%, signal=40%	CYP2D7/ACSL1/MLXIPL/GPT/CYP2D6/ACAA1/PBLD/RDH16/HPX/CFI/SLC37A4/SLC46A3/APOE/TRPM8/KLKB1/CDH2/NR1I2/GPAM/C1RL/SELENOO/FMO3/SLC39A5/PDK4/PPARA/TST/PROS1/APOA5/MBL2/SLC17A2/CAT/HGD/LRP1/PZP/CES1/SORD/SCARB1/SLC25A42/SERPINA11/C1R/UROC1/LIPC/CYP3A4/CYP2C8/NR0B2/SLC25A47/MIA2/FGB/KLF15/F7/HABP2/AC129492.1/ABCA1/TJP2/F13B/CYP7B1/LEAP2/COQ8A/GABARAPL1/SLC25A25/INHBE/ALDH6A1/BAAT/NDRG2/C8B/CTH/PLIN2/AMF…
LEE_LIVER_CANCER_DENA_DN	74	0.777365	3.15478	0.000229253	0.00110632	0.000523932	2916	tags=64%, list=6%, signal=60%	ACSL1/EHHADH/BHMT/PHYH/DPYS/CA5A/LIPC/IL1RAP/RGN/PAH/SLC27A5/CYP7B1/NR1H3/PON1/ACOX1/BAAT/NDRG2/GLYAT/CPT2/OTC/C4BPA/EPHX2/CYP4F2/ALDH1A1/SLC25A13/CSAD/ACSM3/ALDH3A2/ACADSB/AKR1C1/RORC/GPR37/MAT1A/PCK1/FABP1/GCDH/HPD/CYP2E1/DCXR/CYP7A1/SLC2A2/G6PC/AASS/LACTB2/ABCD3/GSTO1/SLC1A2
REACTOME_PHASE_I_FUNCTIONALIZATION_OF_COMPOUNDS	105	0.728125	3.14785	0.000232126	0.00110632	0.000523932	5537	tags=63%, list=11%, signal=56%	POR/CYP3A5/CYP2D6/CES2/CYP2C18/CYP4A22/ALDH2/CYP4A11/RXRA/CYP8B1/CYP2C9/CYP1A2/CYP3A43/FMO3/CYP2A6/CYP4F3/CYP2A7/CYP27A1/CES1/CYP2C19/CYP3A4/CYP2C8/CYP4V2/MARC2/ADH6/NR1H4/ALDH1B1/CYP2B6/CYP7B1/CYP4F11/CYP39A1/MAOA/MAOB/CYP4F12/CYP2J2/CYP4F2/ALDH1A1/FDX1/BPHL/AADAC/CYP1A1/ADH5/CES3/EPHX1/CYP3A7/ADH1A/CYP2E1/ADH1B/CYP7A1/ACSS2/ADH1C/ADH4/CMBL/CYB5R3/CYP2U1/PAOX/CYP11A1/CYP51A1/ARNT/AOC2/AOC3/CYP26…
KEGG_FATTY_ACID_METABOLISM	42	0.864817	3.13456	0.000227169	0.00110632	0.000523932	2854	tags=76%, list=6%, signal=72%	ACSL1/ACSL5/ACAA1/CYP4A22/ALDH2/CYP4A11/ACADS/EHHADH/ACAA2/ACADM/ADH6/ALDH1B1/ACADL/ACOX1/ACADVL/CPT2/ECHS1/ACAT1/CPT1A/ALDH3A2/ACADSB/ADH5/GCDH/ADH1A/ADH1B/ADH1C/ADH4/HADHA/HADHB/ALDH7A1/ECI2/HADH
BURTON_ADIPOGENESIS_6	191	0.656641	3.10908	0.000242307	0.00110632	0.000523932	5107	tags=45%, list=10%, signal=41%	ACAA1/PLIN4/ETFDH/ACADS/APOE/C11orf54/GPD1/ACAA2/TST/CAT/ALAD/SCARB1/G0S2/RARRES2/MARC2/ABCA1/ACADL/THRSP/NR1H3/HSD11B1/ORM1/CD1D/RETSAT/HSD17B4/AGPAT3/APOC1/ALDH1A1/LONP2/SCP2/NNMT/CDIP1/GRHPR/HP/GBE1/SDHA/HIBCH/AQP7/MGLL/REEP6/ALAS1/DBT/HIPK2/CD4/GCSH/QDPR/BCKDHB/KAT2B/PXMP2/DECR1/QKI/SFXN1/CMBL/MCCC1/C9orf72/FXN/UCK1/BNIP3/HIBADH/CHPT1/SLC19A1/FAH/MGST1/HADH/MAP4K4/DDT/CBR1/SOWAHC/CIDEC/PNPLA2…
LEE_LIVER_CANCER_MYC_E2F1_DN	64	0.787799	3.10547	0.000227324	0.00110632	0.000523932	3531	tags=66%, list=7%, signal=61%	ACSL1/GHR/TDO2/HAL/SLC27A2/BHMT/CFH/EGFR/ALAD/G0S2/IL1RAP/RGN/CFHR1/CYP7B1/NR1H3/HSD11B1/ORM1/BAAT/IGF1/CPOX/OTC/C4BPA/EPHX2/GOT1/CYP4F2/KYNU/ORM2/HAO1/APOC4/MAT1A/PCK1/FABP1/HPD/CYP2E1/G6PC/PXMP2/AASS/ABCD3/ETNK2/REPS1/ADIPOR2/SFTPD
LEE_LIVER_CANCER_MYC_TGFA_DN	65	0.774975	3.06565	0.000227428	0.00110632	0.000523932	2594	tags=62%, list=5%, signal=58%	KHK/TDO2/IGFALS/HAL/BHMT/EGFR/G0S2/CA5A/LIPC/IL1RAP/KLF15/RGN/SLC27A5/CYP7B1/NR1H3/HSD11B1/ORM1/ACOX1/ABAT/BAAT/IGF1/CPT2/OTC/C4BPA/EPHX2/GOT1/CYP4F2/ALDH1A1/KYNU/ORM2/HAO1/GPR37/PCK1/FABP1/ABCG2/HPD/G6PC/PXMP2/AASS/ETNK2
KEGG_VALINE_LEUCINE_AND_ISOLEUCINE_DEGRADATION	44	0.837119	3.06173	0.000228624	0.00110632	0.000523932	5067	tags=84%, list=10%, signal=76%	ACAA1/ALDH2/ACADS/EHHADH/ACAA2/ACADM/ALDH1B1/HMGCS2/ABAT/MMUT/ALDH6A1/IVD/AOX1/ECHS1/PCCA/ACAT1/ALDH3A2/ACADSB/HIBCH/HMGCL/DBT/BCKDHB/ACAD8/AUH/MCCC1/HADHA/HIBADH/HADHB/ALDH7A1/BCKDHA/HADH/PCCB/BCAT2/ACAT2/MCCC2/DLD/ALDH9A1
KEGG_METABOLISM_OF_XENOBIOTICS_BY_CYTOCHROME_P450	69	0.764235	3.05847	0.000228519	0.00110632	0.000523932	5537	tags=68%, list=11%, signal=61%	CYP3A5/CYP2C18/CYP2C9/UGT1A4/CYP1A2/CYP3A43/UGT1A3/UGT1A1/CYP2C19/CYP3A4/CYP2C8/UGT2B10/ADH6/AKR1C4/CYP2B6/UGT2B7/GSTA1/AKR1C3/UGT1A9/AKR1C1/CYP1A1/GSTA2/UGT2B4/UGT1A6/ADH5/UGT2B15/EPHX1/CYP3A7/ADH1A/CYP2E1/ADH1B/UGT1A5/ADH1C/ADH4/UGT2A1/MGST1/GSTO1/GSTZ1/UGT2B11/UGT1A7/GSTK1/UGT1A10/GSTM4/MGST2/UGT2B17/GSTM1/ADH7
REACTOME_COMPLEMENT_CASCADE	113	0.695981	3.05451	0.000232019	0.00110632	0.000523932	10772	tags=65%, list=21%, signal=51%	C2/CFI/CLU/C5/SERPING1/CFH/MASP2/PROS1/CFHR4/MBL2/CPN2/C3/C1R/C8G/CFHR3/C1S/CPB2/CFHR2/CFB/CFHR1/C4B/CPN1/FCN2/C8B/C4BPA/MASP1/C8A/CFHR5/C9/CD81/C4A/C4BPB/VTN/C6/COLEC10/F2/FCN3/CFP/IGHV4-39/IGLV1-47/COLEC11/C1QC/IGHG1/IGLV3-1/C7/IGKV3-20/CRP/C1QB/IGHV2-70/CR1/IGKV2-28/IGLC2/IGHV3-7/IGHV3-23/IGHV4-59/C1QA/IGHG2/IGKV1-39/IGLV2-23/IGHV3-48/IGKV2-30/IGKV1-5/IGKV2D-30/IGLV1-40/IGLV1-51/IGKV1-12/IGLV2…
REACTOME_PLASMA_LIPOPROTEIN_ASSEMBLY_REMODELING_AND_CLEARANCE	71	0.756201	3.04542	0.000227169	0.00110632	0.000523932	5305	tags=62%, list=11%, signal=56%	LCAT/LIPG/APOE/AMN/ANGPTL3/PCSK6/PCSK9/ANGPTL8/APOA5/APOF/SCARB1/LIPC/CREB3L3/FURIN/ABCA1/NR1H3/APOC1/P4HB/LPA/APOC2/APOA2/LSR/MTTP/ANGPTL4/BMP1/APOA1/APOB/APOC4/CES3/APOC3/FGF21/ZDHHC8/APOA4/PRKACA/ALB/A2M/LDLRAP1/CIDEC/SOAT2/AP2A2/SAR1B/MBTPS1/CETP/LIPA
WAKABAYASHI_ADIPOGENESIS_PPARG_RXRA_BOUND_WITH_H4K20ME1_MARK	145	0.667149	3.03794	0.000237812	0.00110632	0.000523932	6579	tags=51%, list=13%, signal=44%	CD302/PFKFB1/ACAA2/ACADM/ALAD/KLF15/ABHD15/PC/COQ8A/ACOX1/ALDH6A1/ESRRA/LONP2/AOX1/FDX1/NFE2L1/IDH1/PCCA/ETFB/CSAD/HIBCH/STOM/SELENOP/AGPAT2/CPEB3/MSMO1/GCSH/QDPR/GUCD1/HSDL2/KAT2B/PLA2G15/PCYOX1/PEX3/SFXN1/FAM13A/HIBADH/CHPT1/TMEM259/CYTH1/CHP1/HADH/SCARB2/PUS10/ADIPOR2/PPARG/PLOD1/FBXO8/PNPLA2/BCAT2/CERK/ORMDL3/NMT1/FAM102A/PTGR2/HSD17B12/ERP29/PEX5/APMAP/BCL2L13/DGAT1/SLC25A46/TANK/KSR1/LRRC8D…
KEGG_PPAR_SIGNALING_PATHWAY	69	0.758573	3.03582	0.000228519	0.00110632	0.000523932	3441	tags=54%, list=7%, signal=50%	ACSL1/PLIN1/ACSL5/ACAA1/CYP4A22/CYP4A11/RXRA/CYP8B1/SLC27A2/EHHADH/PCK2/PPARA/ACADM/APOA5/CYP27A1/SLC27A5/SORBS1/ACADL/NR1H3/HMGCS2/ACOX1/CPT2/SCP2/ACOX2/APOA2/CPT1A/ANGPTL4/AQP7/APOA1/APOC3/PCK1/FABP1/CYP7A1/GK/SLC27A4/PPARG/RXRB
UEDA_PERIFERAL_CLOCK	170	0.651632	3.02838	0.000241429	0.00110632	0.000523932	7016	tags=54%, list=14%, signal=47%	COL18A1/POR/HAL/SLC37A4/GLDC/CYP8B1/GALT/ATF5/H6PD/LMO7/AQP9/CLDN1/PPARA/GCLC/APOA5/AVPR1A/CES1/CEBPA/SLC25A47/KLF9/ABCB4/GNE/TLE1/LPIN2/GABARAPL1/FOXA3/DHRS3/ARNTL/PTP4A1/SERPINF2/LONP2/RCL1/FDX1/ONECUT1/LSR/CPT1A/CCL23/UPP2/RORC/AK4/STBD1/PPP1R3C/ALAS1/UBR3/FERMT2/MAPK14/KAT2B/CYP7A1/ELOVL6/SLC2A2/HERPUD1/ADH4/CHKA/BNIP3/ACOT2/MYORG/CHP1/ST3GAL1/PDIA4/IL4R/ST3GAL5/SPATA13/FBXO8/PNPLA2/ETFBKMT/T…
REACTOME_BILE_ACID_AND_BILE_SALT_METABOLISM	43	0.829943	3.02563	0.000227428	0.00110632	0.000523932	2602	tags=65%, list=5%, signal=62%	ABCB11/SLC10A1/RXRA/CYP8B1/SLC27A2/ABCC3/CYP27A1/SLCO1B3/NR1H4/SLC27A5/AKR1C4/CYP7B1/CYP39A1/OSBP/BAAT/HSD17B4/AMACR/AKR1C3/SCP2/ACOX2/AKR1D1/AKR1C1/STARD5/HSD3B7/CYP7A1/SLCO1B1/ALB/OSBPL9
LEE_LIVER_CANCER_ACOX1_DN	65	0.763015	3.01833	0.000227428	0.00110632	0.000523932	3531	tags=66%, list=7%, signal=62%	KHK/TDO2/HAL/SLC37A4/SLCO2B1/MBL2/HGD/EGFR/LIPC/IL1RAP/PIPOX/RGN/PAH/SLC27A5/CYP7B1/NR1H3/HSD11B1/ORM1/BAAT/CPOX/OTC/C4BPA/CKMT2/GOT1/CYP4F2/MASP1/ORM2/AKR1C1/APOC4/GPR37/PPP1R3C/ITIH1/DPP4/HPD/RNASE4/G6PC/SERPINA1/AASS/LECT2/ETNK2/TNFRSF10B/REPS1/SFTPD
LUCAS_HNF4A_TARGETS_UP	58	0.779088	3.01224	0.000227428	0.00110632	0.000523932	5749	tags=69%, list=11%, signal=61%	SLC35D1/ETFDH/ALDH5A1/VIL1/HNF4A/ABCB4/MAN1A1/CIDEB/ATP7B/ACOX1/ACADVL/SLC25A20/NID1/CDIP1/ACOT13/ETNPPL/DHRS1/IL18R1/AKAP1/SELENOP/ACY1/DNAJC22/CAMKK2/MTM1/C1orf115/IL13RA1/COBL/EBP/ABCB1/PKP2/CFLAR/SDC4/DERA/ATXN7L1/BIRC2/ERBB3/MGST2/RBKS/MPP1/PRKCSH
RUAN_RESPONSE_TO_TNF_DN	79	0.732782	3.01189	0.00023015	0.00110632	0.000523932	6058	tags=58%, list=12%, signal=51%	ACSL1/PFKFB1/PLIN4/ACADS/GPAM/GPD1/ACADM/TST/CEBPA/ALAD/SCARB1/G0S2/PC/SORBS1/NR1H3/ORM1/ACOX1/FXYD1/DHRS3/MMUT/HSD17B4/ALDH1A1/NNMT/IDH1/AQP7/ENTPD5/APOC4/ALAS1/PCK1/HIPK2/PXMP2/ECH1/QKI/UCK1/TPP2/BCKDHA/PPARG/CIDEC/PEX11A/AOC3/RNF11/DGAT1/CEBPG/TOB1/NFS1/ESYT1
REACTOME_SYNTHESIS_OF_BILE_ACIDS_AND_BILE_SALTS	34	0.869329	3.0081	0.000225479	0.00110632	0.000523932	2602	tags=65%, list=5%, signal=61%	ABCB11/RXRA/CYP8B1/SLC27A2/CYP27A1/NR1H4/SLC27A5/AKR1C4/CYP7B1/CYP39A1/OSBP/BAAT/HSD17B4/AMACR/AKR1C3/SCP2/ACOX2/AKR1D1/AKR1C1/HSD3B7/CYP7A1/OSBPL9
REACTOME_PEROXISOMAL_PROTEIN_IMPORT	63	0.758777	2.98244	0.000227376	0.00110632	0.000523932	4618	tags=57%, list=9%, signal=52%	AGXT/ACAA1/MLYCD/SLC27A2/EHHADH/CAT/PHYH/PIPOX/PECR/ACOX1/HAO2/BAAT/HSD17B4/EPHX2/AMACR/LONP2/SCP2/ACOX2/IDH1/DAO/HMGCL/HAO1/PEX14/ECH1/HACL1/ACOT2/ECI2/PAOX/CRAT/AGPS/CROT/DHRS4/DECR2/GSTK1/DDO/PEX5
LEE_LIVER_CANCER_MYC_DN	63	0.756958	2.97529	0.000227376	0.00110632	0.000523932	2251	tags=52%, list=4%, signal=50%	IGF2/PFKFB1/TDO2/HAL/SLC37A4/BHMT/CFH/EGFR/FGG/G0S2/KLF15/RIDA/DPYD/CFHR1/ORM1/IGF1/OTC/C4BPA/GOT1/IL1R1/KYNU/ORM2/MT2A/HAO1/PCK1/PCOLCE/ZG16/FKBP5/SATB1/G6PC/HERPUD1/AASS/SFXN1
REACTOME_METABOLISM_OF_VITAMINS_AND_COFACTORS	189	0.629147	2.97308	0.000242189	0.00110632	0.000523932	7355	tags=52%, list=15%, signal=45%	SDC2/GCH1/TTPA/CYP8B1/APOE/ACACB/AMN/SLC19A3/SHMT1/NADK2/ALDH1L1/BCO2/MOCS1/VNN1/PANK1/LRP1/PC/NT5E/AKR1C4/MMUT/RETSAT/QPRT/MMAA/APOM/NAPRT/MMACHC/AKR1C3/NNMT/MTHFD1/AOX1/APOC2/ABCD4/IDH1/SLC23A2/APOA2/PARP4/PCCA/AKR1C1/ENPP1/MOCOS/SDC1/RBP4/APOA1/APOB/APOC3/SLC46A1/TTR/GPC6/PDSS2/NADK/GPHN/APOA4/MTHFS/SHMT2/COASY/MCCC1/SLC23A1/MTHFD2L/CYB5R3/GCHFR/NAMPT/LMBRD1/FPGS/SLC19A1/GSTO1/NMRK1/PCCB/BTD/M…
LEE_LIVER_CANCER_E2F1_DN	64	0.753621	2.97073	0.000227324	0.00110632	0.000523932	3400	tags=58%, list=7%, signal=54%	ACSL1/GHR/TDO2/HAL/SERPINF1/BHMT/CFH/EGFR/IL1RAP/RGN/CFHR1/NR1H3/HSD11B1/ORM1/BAAT/IGF1/OTC/C4BPA/GOT1/ALDH1A1/KYNU/ORM2/AKR1C1/HAO1/GPR37/PCK1/FABP1/ABCG2/HPD/CYP2E1/ZG16/PXMP2/AASS/LECT2/GSTO1/REPS1/ADIPOR2
VARELA_ZMPSTE24_TARGETS_DN	41	0.813677	2.93617	0.000228415	0.00110632	0.000523932	1900	tags=54%, list=4%, signal=52%	RDH16/IGFALS/KLKB1/EHHADH/C11orf54/VNN1/CAT/G0S2/CYP2C8/RGN/CD1D/TMEM176A/CPT2/OTC/ALDH1A1/BPHL/ALDH3A2/INPP5B/REEP6/FABP1/ALDOB/SLC31A1
MCBRYAN_PUBERTAL_BREAST_6_7WK_UP	186	0.621497	2.93395	0.000241371	0.00110632	0.000523932	10495	tags=59%, list=21%, signal=47%	MLXIPL/LIPG/IL6R/IGFALS/STEAP3/GPAM/GPD1/ABCC3/FGG/DAPK1/LRP5/HSD17B11/SORBS1/GALNT2/IGFBP4/SLC38A10/EIF4EBP2/NFATC3/PTK2B/GYS2/ZBTB20/STOM/KIF1C/AKT2/ECM1/IGHM/FZD4/HIPK2/MAPK14/UBE4A/EPAS1/APLP2/TNS1/QKI/SIRPA/PIK3R1/PTEN/OGFR/SH2B3/PHGDH/CYTH1/CP/RESF1/GRB10/CYGB/ITSN2/SMC6/ATP6V0A1/BRD4/NFIC/NDST1/SFTPD/SECISBP2L/EHD3/EGLN1/TMEM143/SPPL2A/ANKH/CUX1/IL6ST/MBTPS1/LIPA/PPP6R3/NFIX/CLEC3B/NFIL3/S…
KEGG_GLYCINE_SERINE_AND_THREONINE_METABOLISM	31	0.864083	2.92977	0.000224618	0.00110632	0.000523932	4824	tags=90%, list=10%, signal=82%	CBS/SARDH/GLYCTK/DMGDH/AGXT/PSAT1/GLDC/CHDH/AMT/SHMT1/BHMT/GNMT/GATM/SDS/PIPOX/AGXT2/MAOA/CTH/MAOB/DAO/ALAS1/SHMT2/GAMT/PHGDH/GCAT/AOC2/AOC3/DLD
BOYAULT_LIVER_CANCER_SUBCLASS_G1_DN	40	0.815921	2.92887	0.000229253	0.00110632	0.000523932	5167	tags=72%, list=10%, signal=65%	MPDZ/GCLC/ABHD2/KLF9/CYP7B1/GADD45A/CYP4F11/CDC14B/ALDH1A1/TMED5/GBE1/PRSS53/KAT2B/BLCAP/MBNL2/CTBS/GCHFR/LAP3/DGLUCY/SLC39A8/TRIM2/ABCB1/GCLM/CTSB/SLC16A1/COQ9/ZNF330/SDHB/BTN3A2
KEGG_STEROID_HORMONE_BIOSYNTHESIS	55	0.760674	2.90767	0.000228624	0.00110632	0.000523932	5418	tags=69%, list=11%, signal=62%	CYP3A5/HSD17B6/UGT1A4/CYP3A43/UGT1A3/UGT1A1/CYP3A4/UGT2B10/AKR1C4/CYP7B1/SULT1E1/HSD11B1/UGT2B7/STS/AKR1C3/UGT1A9/AKR1D1/AKR1C1/CYP1A1/UGT2B4/UGT1A6/UGT2B15/CYP3A7/HSD17B2/CYP7A1/UGT1A5/CYP17A1/SRD5A2/UGT2A1/SRD5A1/CYP11A1/UGT2B11/UGT1A7/UGT1A10/HSD17B3/HSD17B12/UGT2B17/HSD17B8
KEGG_TRYPTOPHAN_METABOLISM	40	0.80988	2.90719	0.000229253	0.00110632	0.000523932	2854	tags=62%, list=6%, signal=59%	HAAO/AADAT/TDO2/ALDH2/CYP1A2/EHHADH/CAT/IDO2/ALDH1B1/ACMSD/OGDHL/MAOA/MAOB/KYNU/AOX1/ECHS1/DDC/ACAT1/ALDH3A2/CYP1A1/GCDH/AFMID/HADHA/ALDH7A1/HADH
KEGG_DRUG_METABOLISM_OTHER_ENZYMES	51	0.770346	2.90064	0.00022941	0.00110632	0.000523932	4255	tags=65%, list=8%, signal=59%	CYP3A5/UPB1/CES2/NAT2/UGT1A4/CYP3A43/UGT1A3/CYP2A6/CYP2A7/CES1/UGT1A1/DPYS/CYP3A4/UGT2B10/DPYD/XDH/UGT2B7/UGT1A9/CDA/TK2/UPP2/UGT2B4/UGT1A6/UGT2B15/CYP3A7/CES5A/UGT1A5/UCK1/UGT2A1/TPMT/UGT2B11/UGT1A7/UGT1A10
REACTOME_SYNTHESIS_OF_BILE_ACIDS_AND_BILE_SALTS_VIA_7ALPHA_HYDROXYCHOLESTEROL	24	0.906717	2.89245	0.00022482	0.00110632	0.000523932	1906	tags=79%, list=4%, signal=76%	ABCB11/RXRA/CYP8B1/SLC27A2/CYP27A1/NR1H4/SLC27A5/AKR1C4/CYP7B1/BAAT/HSD17B4/AMACR/AKR1C3/SCP2/ACOX2/AKR1D1/AKR1C1/HSD3B7/CYP7A1
FULCHER_INFLAMMATORY_RESPONSE_LECTIN_VS_LPS_DN	446	0.556553	2.89169	0.000260688	0.00110632	0.000523932	10621	tags=53%, list=21%, signal=42%	CD302/GCH1/METTL7A/FAM20A/MAF/SLC46A3/LPCAT3/SERPING1/CES1/SCARB1/GATM/SDS/CHST13/CYP3A4/C1S/FMR1/CPNE8/CD14/CFB/KANK1/ECHDC1/PINK1/CCDC152/SAMD4A/PLIN2/RDX/APOC1/ALDH1A1/TMEM140/STAB1/SH3PXD2A/TBC1D2/ACBD5/DYSF/SEPHS2/CCDC82/STOM/SELENOP/HNMT/FNIP2/MARCO/PIK3AP1/DBT/PDE8A/CD4/MAFB/SIGLEC1/HERC6/XAF1/NR3C1/HERC5/SP100/XRN1/PLA2G15/TRIM14/QKI/ARRDC3/CD163/CELF1/BACH1/BNIP3/CALCOCO2/GPX3/CPM/CHPT1/…
REACTOME_MITOCHONDRIAL_FATTY_ACID_BETA_OXIDATION	37	0.818128	2.88535	0.000227583	0.00110632	0.000523932	3829	tags=62%, list=8%, signal=57%	ACAD11/ACADS/ACAA2/ACOT12/ACADM/ACADL/MMUT/ACADVL/MMAA/ECHS1/ACOT13/PCCA/ACSM3/PCTP/DECR1/ACSF2/HADHA/HADHB/ACOT2/HADH/PCCB/ACAD10/ACOT1
REACTOME_CYTOCHROME_P450_ARRANGED_BY_SUBSTRATE_TYPE	65	0.728453	2.88162	0.000227428	0.00110632	0.000523932	3820	tags=55%, list=8%, signal=51%	POR/CYP3A5/CYP2D6/CYP2C18/CYP4A22/CYP4A11/RXRA/CYP8B1/CYP2C9/CYP1A2/CYP3A43/CYP2A6/CYP4F3/CYP2A7/CYP27A1/CYP2C19/CYP3A4/CYP2C8/CYP4V2/NR1H4/CYP2B6/CYP7B1/CYP4F11/CYP39A1/CYP4F12/CYP2J2/CYP4F2/FDX1/CYP1A1/CYP3A7/CYP2E1/CYP7A1/CYP2U1/CYP11A1/CYP51A1/ARNT
GUO_TARGETS_OF_IRS1_AND_IRS2	94	0.672056	2.85331	0.000231	0.00110632	0.000523932	5956	tags=52%, list=12%, signal=46%	IL6R/SGK2/GCH1/NR1I2/ABCG5/SLC7A2/PCSK9/TAT/ABCG8/SCARB1/KLF9/ABCB4/GNE/GALNT2/AGTR1/CDIP1/INSR/CPT1A/SC5D/PDE7B/PCK1/MSMO1/MVK/GK/PPARGC1A/G6PC/PPP1R3B/LSS/TM4SF4/RCAN1/TAOK3/RBL2/IGFBP1/ECI2/PPARGC1B/CYP51A1/NUDT4/GRN/CTPS1/TNFRSF1B/ACAT2/PPM1A/CEBPB/DHCR24/MOGS/ARHGAP5/RND1/LPP/CDC34
REACTOME_METABOLISM_OF_STEROIDS	150	0.623579	2.85215	0.00023753	0.00110632	0.000523932	5158	tags=45%, list=10%, signal=41%	ABCB11/SLC10A1/RXRA/CYP8B1/ACACB/SLC27A2/GPAM/PPARA/ABCC3/CYP27A1/SLCO1B3/NR1H4/HSD17B11/SLC27A5/AKR1C4/CYP7B1/HSD11B1/CYP39A1/OSBP/BAAT/HSD17B4/AMACR/AKR1C3/SCP2/ACOX2/FDX1/AKR1D1/SC5D/AKR1C1/SCAP/HSD17B2/STARD5/MSMO1/HSD3B7/INSIG1/HSD17B14/GC/SEC24B/MVK/HELZ2/CYP7A1/ELOVL6/CYP17A1/SLCO1B1/SRD5A2/STARD4/ALB/LSS/INSIG2/OSBPL9/EBP/PLPP6/SRD5A1/SEC24A/CYP11A1/CYP51A1/LGMN/ACAT2/HSD17B3/HSD17B12/LBR…
LI_WILMS_TUMOR_VS_FETAL_KIDNEY_1_UP	183	0.606043	2.85054	0.000242836	0.00110632	0.000523932	7848	tags=52%, list=16%, signal=44%	ACSL1/CLU/SLC37A4/MAF/APOE/SERPINF1/ALDH4A1/KIFC3/ENPEP/RIDA/DST/PLS3/HPN/GADD45A/ALDH6A1/TFPI/APOM/CTSO/IL1R1/ST3GAL6/ALDH1A1/TMED5/AKR1C3/SCP2/SLC30A1/ITPRID2/SMPDL3A/TRAM2/ACSM3/SEPHS2/SELENOP/PPP1R3C/IQGAP2/MAN2A1/MYLK/KDR/MSMO1/PDE8A/PLCG2/TGOLN2/NR3C1/SP100/HERPUD1/PGRMC2/MERTK/ETS2/CX3CL1/ACOT2/GLUD2/THSD7A/TOM1L1/CRADD/TEK/SERINC5/TRIM2/IFIT1/FUCA1/CARD10/CRYZ/CDH5/GNAI1/SDHD/TPST1/FGFR3/…
REACTOME_REGULATION_OF_LIPID_METABOLISM_BY_PEROXISOME_PROLIFERATOR_ACTIVATED_RECEPTOR_ALPHA_PPARALPHA	119	0.642707	2.83389	0.000235183	0.00110632	0.000523932	4882	tags=36%, list=10%, signal=33%	ACSL1/CYP4A11/RXRA/AGT/PPARA/SULT2A1/ACADM/APOA5/G0S2/ABCB4/NR1H4/ABCA1/NR1H3/HMGCS2/ACOX1/CPT2/PLIN2/ARNTL/ESRRA/UGT1A9/APOA2/CPT1A/CYP1A1/ANGPTL4/APOA1/RORA/ALAS1/FABP1/MED13/HELZ2/CYP7A1/PPARGC1A/PPARG/RXRB/PPARGC1B/CCNC/NCOR1/ARNT/PEX11A/RGL1/MED16/CHD9/MED23
REACTOME_METABOLISM_OF_WATER_SOLUBLE_VITAMINS_AND_COFACTORS	123	0.637001	2.82662	0.000234797	0.00110632	0.000523932	7355	tags=53%, list=15%, signal=45%	CYP8B1/ACACB/AMN/SLC19A3/SHMT1/NADK2/ALDH1L1/MOCS1/VNN1/PANK1/PC/NT5E/MMUT/QPRT/MMAA/NAPRT/MMACHC/NNMT/MTHFD1/AOX1/ABCD4/SLC23A2/PARP4/PCCA/ENPP1/MOCOS/SLC46A1/NADK/GPHN/MTHFS/SHMT2/COASY/MCCC1/SLC23A1/MTHFD2L/CYB5R3/NAMPT/LMBRD1/FPGS/SLC19A1/GSTO1/NMRK1/PCCB/BTD/MMAB/TCN2/PNPO/NAXD/CYB5A/PARP14/CD38/NUDT12/MCCC2/ENPP3/TPK1/ENPP2/NFS1/PTGIS/PARP9/RNLS/ACP5/MTHFR/AASDHPPT/PARP16/RFK
SMID_BREAST_CANCER_NORMAL_LIKE_UP	480	0.540332	2.826	0.000264201	0.00110905	0.000525229	9231	tags=45%, list=18%, signal=37%	COL18A1/IL6R/CD302/CFI/CLU/ACACB/SERPING1/CFH/PALMD/PROS1/SYNE3/CXCL2/CES1/C3/C1R/F10/ST3GAL2/LIME1/C1S/LEPR/ABCA8/NT5E/FOXN3/ABCA6/DST/PPP2R1B/SORBS1/MT1M/PLA2G2A/FNDC4/CD1D/FXYD1/ELMO1/PLPP3/IGF1/TFPI/NR3C2/GDF7/IL1R1/ALDH1A1/CDO1/MET/BBOX1/CRY2/HHEX/IL18R1/ZBTB20/ST6GAL1/SELENOP/RNF125/FYN/MME/MAST3/LYVE1/IGHM/NPR2/TF/SPRY2/DPP4/MYLK/BIN1/TMOD1/CD4/SIGLEC1/SYNE1/ADH1B/DEPP1/SATB1/MAPRE2/IL7/CY…
PILON_KLF1_TARGETS_UP	482	0.538968	2.82011	0.00026441	0.00110905	0.000525229	6059	tags=36%, list=12%, signal=32%	SDC2/SNTB1/MLXIPL/COL18A1/GHR/LIPG/IGF2/C2orf72/CYP2D6/HPX/CFI/CLU/FZD5/RNF128/SLC27A2/SERPINA10/AGMAT/CDH2/SLC38A4/C5/ANGPTL3/SERPING1/HS3ST3B1/AFM/SLC39A5/ABCC3/HGFAC/SEMA4G/FGG/C8G/HNF4A/ITIH3/C1S/FGA/FGB/ABCA8/SLC30A10/ABCA1/CFB/NR1H3/HPN/LPIN2/NDRG2/APOM/SERPINF2/MASP1/PTPRD/ACOX2/INSR/IHH/SLC30A1/HECTD1/AADAC/CGN/SLC23A2/SPP2/APOA2/DLC1/GATA6/SERPINA6/HIBCH/CAMK2N1/SERPINC1/RBP4/VTN/MARCO/A…
KEGG_PROPANOATE_METABOLISM	33	0.819414	2.81888	0.00022482	0.00110632	0.000523932	5067	tags=70%, list=10%, signal=63%	ALDH2/MLYCD/ACACB/EHHADH/ACADM/ALDH1B1/ABAT/MMUT/ALDH6A1/ACSS3/ECHS1/PCCA/ACAT1/ALDH3A2/HIBCH/SUCLG2/ACSS2/HADHA/ALDH7A1/LDHAL6B/PCCB/ACAT2/ALDH9A1
IIZUKA_LIVER_CANCER_PROGRESSION_G2_G3_UP	27	0.860439	2.81788	0.00022604	0.00110632	0.000523932	4241	tags=74%, list=8%, signal=68%	ACSL1/COBLL1/ACSM2B/GPLD1/PCSK6/RARRES2/CPB2/FOXN3/PAH/BAAT/RAPGEF2/APOC1/PGRMC1/SDC1/SELENOP/FERMT2/BNIP3/HADH/SDHD/PPM1A
MINGUEZ_LIVER_CANCER_VASCULAR_INVASION_DN	21	0.910009	2.80758	0.000225785	0.00110632	0.000523932	2253	tags=90%, list=4%, signal=86%	SLC38A4/MASP2/DEPDC7/DPYS/CYP3A4/KLF9/PAH/PON1/GLYAT/RCL1/GLYATL1/UGT2B15/MAT1A/PCK1/MYLK/PPARGC1A/ADH4/AASS/PIK3R1
REACTOME_GLYOXYLATE_METABOLISM_AND_GLYCINE_DEGRADATION	31	0.824908	2.79694	0.000224618	0.00110632	0.000523932	5315	tags=71%, list=11%, signal=64%	AGXT/GLDC/AMT/ALDH4A1/GNMT/AGXT2/PRODH2/HOGA1/GRHPR/GOT2/DHTKD1/DAO/HAO1/DBT/GCSH/BCKDHB/PXMP2/BCKDHA/DDO/LIAS/DLD/PDHA1
RUTELLA_RESPONSE_TO_CSF2RB_AND_IL4_DN	318	0.556676	2.79051	0.000253036	0.00110632	0.000523932	10457	tags=51%, list=21%, signal=40%	SNTB1/PCK2/AQP9/ACAA2/ABCC3/VNN1/CYP27A1/CES1/C3/MT1X/MT1H/SLC43A3/KLF9/CD14/NR1H3/PINK1/PDIA5/PID1/ACADVL/PLIN2/ATP13A3/MT1F/ARHGEF40/SORL1/STS/FBP1/SLC30A1/FDX1/ACAT1/MT2A/ALDH3A2/MT1G/ST6GAL1/FYN/IQGAP2/SIK3/CCL15/SIGIRR/MAFB/SLC31A1/SUN2/RNASE4/APLP2/MAPRE2/DECR1/HERPUD1/CD163/CTSL/MYO15B/ETS2/CTBS/HADHA/TLE4/CPM/PPIF/CHPT1/NAMPT/CFP/FAH/ZNF395/AMPD2/LAMP1/TCF7L2/SCARB2/PLCL2/NRG1/HLA-E/PLAC8…
LEE_LIVER_CANCER_CIPROFIBRATE_DN	66	0.703769	2.78852	0.000228519	0.00110632	0.000523932	3138	tags=55%, list=6%, signal=51%	HAL/SLC37A4/BHMT/MBL2/EGFR/CA5A/IL1RAP/PIPOX/PAH/CYP7B1/NR1H3/HSD11B1/PON1/ABAT/BAAT/OTC/C4BPA/SLC17A3/KYNU/ACADSB/AKR1C1/SERPINA6/GPR37/PPP1R3C/PCK1/DPP4/HPD/CYP2E1/CYP7A1/SLC2A2/RNASE4/G6PC/LECT2/ETNK2/SLC1A2/TNFRSF10B
REACTOME_DISEASES_OF_METABOLISM	104	0.644474	2.7797	0.000232666	0.00110632	0.000523932	3595	tags=44%, list=7%, signal=41%	SLC35D1/KHK/SLC37A4/AMN/UGT1A4/FMO3/GCLC/HYAL1/CYP27A1/UGT1A1/PC/PAH/CYP7B1/MMUT/MAOA/MMAA/MMACHC/FDX1/ABCD4/IDH1/PCCA/GBE1/GYS2/ACY1/MAT1A/PPP1R3C/GYG2/ALDOB/DCXR/CYP17A1/G6PC/MCCC1/LMBRD1/CYP2U1/OPLAH/ARSB/NAGLU/PCCB/GCLM/TPMT/GALNS/SFTPD/CYP11A1/BTD/MMAB/TCN2
REACTOME_FORMATION_OF_FIBRIN_CLOT_CLOTTING_CASCADE	39	0.779894	2.77847	0.00022941	0.00110632	0.000523932	2535	tags=54%, list=5%, signal=51%	SERPIND1/KLKB1/PROC/SERPING1/F12/PROS1/F11/FGG/F10/F5/FGA/FGB/F7/F9/F13B/TFPI/SERPINC1/SERPINA5/KNG1/F2/A2M
LANDIS_ERBB2_BREAST_PRENEOPLASTIC_DN	57	0.722363	2.77809	0.00022899	0.00110632	0.000523932	3989	tags=60%, list=8%, signal=55%	GHR/ACAA1/GPAM/ACAA2/CES1/ALAD/PGM1/NR1H3/CPT2/ST3GAL6/ALDH1A1/SCP2/GBE1/ETFB/PTPRB/CHCHD10/BCKDHB/APLP2/DECR1/MCCC1/UCK1/HADHB/GPX3/CHPT1/HTRA1/NDUFV1/GSTZ1/ADIPOR2/GNAI1/SOWAHC/CIDEC/CXCL12/BCAT2/LPIN1
MOOTHA_FFA_OXYDATION	23	0.878516	2.7726	0.00022482	0.00110632	0.000523932	2960	tags=74%, list=6%, signal=70%	ACSL1/ACADS/ACAA2/ACADM/ACADL/ACADVL/CPT2/AMACR/ECHS1/ACAT1/CPT1A/ACADSB/DECR1/HADHA/HADHB/HADH/CRAT
LINDGREN_BLADDER_CANCER_WITH_LOH_IN_CHR9Q	115	0.630815	2.77158	0.000233699	0.00110632	0.000523932	10099	tags=58%, list=20%, signal=47%	RXRA/ASS1/ACO1/SLC9B2/FUBP3/FBP1/PTPN3/LRRC8A/RAB14/TMEM245/ERP44/PTGR1/TMOD1/NEK6/VPS13A/SETX/SLC2A8/NMRK1/CYB5D2/ALG2/ABL1/ITPR2/SMARCA2/PNPO/CREBL2/SECISBP2/GOLGA1/GNAQ/TOPORS/SMC5/ENDOG/XPA/CDK5RAP2/ANKH/STX17/ECPAS/C9orf78/SEC16A/TOR1B/DUSP22/MIS12/DDX3Y/TOR1A/NUP214/SLC35A5/SLC35D2/SPOUT1/TDRP/CDK9/TSC1/FAM122A/GPR107/CUL5/MTAP/CARNMT1/RAD23B/UGCG/ISCA1/FKTN/CNTRL/DOCK8/PRKCQ/GLE1/FBXW2/DPP…
JOHNSTONE_PARVB_TARGETS_3_UP	431	0.534093	2.76831	0.000259538	0.00110632	0.000523932	9931	tags=49%, list=20%, signal=40%	SNTB1/ACSL1/COL18A1/SARDH/LIPG/ACSL5/CLU/ERRFI1/STEAP3/LPCAT3/AQP3/PDK4/ABCC3/CAT/LRP1/C3/APOL6/C1S/NR1H3/RRAS2/VAV2/TIAF1/RETSAT/HSD17B4/ACADVL/PLIN2/TTC7B/PTP4A1/LGR4/AKR1C3/P4HB/SLC30A1/NFE2L1/ALDH3A2/AKR1C1/MEGF9/HNMT/ACY1/TGM2/TMEM245/MGAT4B/SIK3/PTGR1/IRAK2/PLD1/ABCG2/EPAS1/HELZ2/SPTBN1/TPRG1L/ELOVL6/DNMBP/APLP2/ECH1/PYGL/CREG1/CTSL/ORAI3/HTRA1/CALD1/RAPGEF1/LMTK2/OPTN/NT5DC1/MGST1/PPP1R21/…
LANDIS_ERBB2_BREAST_TUMORS_324_DN	148	0.604728	2.76251	0.00023753	0.00110632	0.000523932	6993	tags=52%, list=14%, signal=45%	ACSL1/COL18A1/GHR/ACAA1/H6PD/GPAM/ACAA2/CES1/ALAD/PHYH/GJB2/PGM1/SORBS1/MAN1A1/NR1H3/MMUT/IVD/CPT2/EPHX2/ST3GAL6/ALDH1A1/SCP2/IDH1/GBE1/ETFB/ALAS1/PTPRB/FZD4/PDE8A/CHCHD10/BCKDHB/SPTBN1/AUH/APLP2/DECR1/QKI/NKIRAS1/MCCC1/UCK1/HADHB/GPX3/CHPT1/HTRA1/CFP/HADH/NDUFV1/GSTZ1/PLAC8/ADIPOR2/GNAI1/FAM107B/SOWAHC/CIDEC/CXCL12/ZEB1/CYB5A/BCAT2/SNRK/LPIN1/NRP1/MRC1/DGAT1/PLPP1/PDHA1/AHNAK/BNIP2/CLEC3B/CDC34/…
REACTOME_PEROXISOMAL_LIPID_METABOLISM	29	0.824895	2.75662	0.000222866	0.00110632	0.000523932	4478	tags=72%, list=9%, signal=66%	ACAA1/MLYCD/SLC27A2/EHHADH/PHYH/PECR/ACOX1/HAO2/HSD17B4/AMACR/SCP2/ACBD4/ACOX2/ACBD5/ALDH3A2/HACL1/ECI2/CRAT/CROT/DECR2/ACOT6
REACTOME_PLASMA_LIPOPROTEIN_REMODELING	32	0.806025	2.75452	0.000223864	0.00110632	0.000523932	2158	tags=66%, list=4%, signal=63%	LCAT/LIPG/APOE/ANGPTL3/PCSK6/ANGPTL8/APOA5/APOF/LIPC/CREB3L3/FURIN/LPA/APOC2/APOA2/ANGPTL4/APOA1/APOB/APOC3/FGF21/APOA4/ALB
KEGG_PRIMARY_BILE_ACID_BIOSYNTHESIS	16	0.95966	2.75391	0.000222618	0.00110632	0.000523932	1906	tags=88%, list=4%, signal=84%	CYP8B1/CYP27A1/SLC27A5/AKR1C4/CYP7B1/CYP39A1/BAAT/HSD17B4/AMACR/SCP2/ACOX2/AKR1D1/HSD3B7/CYP7A1
MCBRYAN_PUBERTAL_BREAST_4_5WK_DN	191	0.580679	2.74942	0.000242307	0.00110632	0.000523932	9682	tags=53%, list=19%, signal=43%	ACSL1/MLXIPL/IGFALS/ETFDH/STEAP3/EHHADH/GPAM/GPD1/ZBTB16/ACAA2/ALDH1L1/PDK4/SLC16A2/PLIN5/LRP5/KLF15/SORBS1/BCHE/GALNT2/COQ8A/ACADVL/NID1/IGFBP4/APOC2/ACAT1/STOM/KIF1C/AKT2/BMP1/REEP6/PPP1R3C/DBT/HIPK2/UBE4A/EPAS1/RPS6KA3/GK/APLP2/TNS1/BLCAP/ECH1/QKI/SFXN1/ACSF2/SH2B3/TPP2/CYTH1/CP/GRB10/CDH5/ATP6V0A1/NFIC/PPARGC1B/BCAT2/NRK/ZFAND5/ATPAF2/PER3/KLHL2/LETMD1/CUX1/MARC1/MBTPS1/PRKCE/ACVR1C/LIPA/ZNF1…
REACTOME_PHASE_II_CONJUGATION_OF_COMPOUNDS	108	0.632634	2.74681	0.000232666	0.00110632	0.000523932	6480	tags=56%, list=13%, signal=49%	SLC35D1/ACSM2A/NAT2/UGT1A4/CYP1A2/ACSM2B/UGT1A3/SULT2A1/GCLC/UGT1A1/UGP2/ACSM5/UGT2B10/SULT1E1/GLYAT/UGT2B7/GSTA1/NNMT/UGT1A9/GLYATL1/UGT3A1/GSTA2/UGT2B4/UGT1A6/UGT2B15/MAT1A/CNDP2/SULT1A1/UGT1A5/SULT1A2/SLC26A1/UGT2A1/GLYATL3/TPST2/MGST1/GSTO1/OPLAH/GSTZ1/ABHD14B/GCLM/TPMT/AS3MT/GSTT2B/TPST1/UGT2B11/UGT1A7/GSTK1/UGT1A10/SULT1A3/GSTM4/MGST2/AKR1A1/UGT2B17/GSTM1/ESD/ABHD10/PAPSS2/AHCY/GGT7/UGT1A8
KEGG_STARCH_AND_SUCROSE_METABOLISM	51	0.727351	2.73875	0.00022941	0.00110632	0.000523932	8117	tags=69%, list=16%, signal=58%	UGT1A4/UGT1A3/UGT1A1/UGP2/PGM1/UGT2B10/GBA3/UGT2B7/UGT1A9/GBE1/ENPP1/GYS2/UGT2B4/UGT1A6/AMY2B/UGT2B15/GANC/TREH/UGT1A5/G6PC/PYGL/UGT2A1/HK3/UGT2B11/UGT1A7/UGT1A10/AGL/ENPP3/UGT2B17/GAA/UGT1A8/GUSB/UGDH/GCK/UGT2A3
REACTOME_METABOLISM_OF_AMINO_ACIDS_AND_DERIVATIVES	370	0.534571	2.72974	0.000254001	0.00110632	0.000523932	3410	tags=30%, list=7%, signal=28%	ASPG/CBS/SARDH/DMGDH/BHMT2/AGXT/GPT/DIO1/NAGS/HAAO/PSAT1/AADAT/CBSL/TDO2/HAL/GLDC/CHDH/AGMAT/AMT/SHMT1/ALDH4A1/BHMT/DBH/ASS1/FTCD/GPT2/TST/TAT/GNMT/HGD/GATM/SDS/UROC1/ARG1/PIPOX/GLS2/ASL/IDO2/RIDA/PAH/AGXT2/ACMSD/SCLY/GLUD1/PRODH2/ALDH6A1/KYAT1/CPS1/IVD/CTH/OTC/MPST/CKMT2/SLC6A12/GOT1/NNMT/CDO1/HOGA1/KYNU/SEPSECS/GRHPR/GOT2/DHTKD1/BBOX1/DDC/SLC25A13/TH/ACAT1/SLC25A10/CSAD/ADI1/ACADSB/DAO/SEPHS2/H…
REACTOME_INITIAL_TRIGGERING_OF_COMPLEMENT	78	0.665529	2.72853	0.000229463	0.00110632	0.000523932	11848	tags=65%, list=24%, signal=50%	C2/MASP2/MBL2/C3/C1R/C1S/CFB/C4B/FCN2/MASP1/C4A/COLEC10/FCN3/CFP/IGHV4-39/IGLV1-47/COLEC11/C1QC/IGHG1/IGLV3-1/IGKV3-20/CRP/C1QB/IGHV2-70/IGKV2-28/IGLC2/IGHV3-7/IGHV3-23/IGHV4-59/C1QA/IGHG2/IGKV1-39/IGLV2-23/IGHV3-48/IGKV2-30/IGKV1-5/IGKV2D-30/IGLV1-40/IGLV1-51/IGKV1-12/IGLV2-11/IGKV4-1/IGHV3-33/IGLV2-14/IGKV1-16/IGLC3/IGLV3-19/IGHV2-5/IGKV1D-39/IGKV1-17/IGHV4-34
BAELDE_DIABETIC_NEPHROPATHY_UP	89	0.648107	2.7262	0.000230681	0.00110632	0.000523932	6669	tags=52%, list=13%, signal=45%	CAPN3/CLU/ACSM2A/ALDH4A1/ASS1/GPLD1/HYAL1/MIA2/HPN/PLPP3/UGT2B7/CYP4F2/AKR1C3/FBP1/BPHL/ZCCHC24/BBOX1/MT2A/MT1G/C4A/ACY1/PTPRB/LTK/CRHBP/ENG/SPG7/ID1/TEK/ARHGEF15/CCDC69/FTL/IMPA2/UGT1A10/SEMA6A/JADE3/AKR1A1/PDE2A/NOTCH4/ADAMTSL2/AOC1/CLEC3B/GAS6/PTGIS/INPP5K/ADGRF5/GDPD5
BIOCARTA_NUCLEARRS_PATHWAY	34	0.787788	2.72595	0.000225479	0.00110632	0.000523932	3432	tags=68%, list=7%, signal=63%	ABCC2/ABCB11/CYP4A22/CYP4A11/CYP8B1/CYP2C9/NR1I2/CYP1A2/ABCG5/PPARA/ABCC3/NR1I3/CYP3A4/NR0B2/ABCB4/NR1H4/ABCA1/CYP2B6/NR1H3/CYP2E1/ABCD3/ABCB1/PPARG
MOOTHA_HUMAN_MITODB_6_2002	429	0.521568	2.70343	0.000258799	0.00110632	0.000523932	7844	tags=37%, list=16%, signal=31%	ACSL1/SARDH/ACSL5/AGXT/GPT/ALDH2/ETFDH/MLYCD/ACADS/AMT/SHMT1/ALDH4A1/PCK2/ACAA2/CLPX/PDK4/ACADM/TST/TAT/CYP27A1/DHODH/GATM/SDS/CA5A/GLS2/PC/BDH1/ACADL/GLUD1/HMGCS2/ATP7B/ABAT/MMUT/MAOA/CPS1/GLYAT/IVD/ACADVL/POLRMT/CPT2/CPOX/OTC/MPST/MAOB/SLC25A20/CKMT2/GOT1/AMACR/SCP2/MTHFD1/FDX1/ECHS1/GOT2/SLC25A13/PCCA/ACAT1/CPT1A/ETFB/SLC25A10/SDHA/ACADSB/TK2/HMGCL/AKAP1/AK4/ALAS1/SLC25A15/PPID/GCDH/DBT/TXNRD2…
REACTOME_XENOBIOTICS	24	0.847353	2.70307	0.00022482	0.00110632	0.000523932	1880	tags=67%, list=4%, signal=64%	CYP3A5/CYP2D6/CYP2C18/CYP2C9/CYP1A2/CYP3A43/CYP2A6/CYP2A7/CYP2C19/CYP3A4/CYP2C8/CYP2B6/CYP2J2/CYP1A1/CYP3A7/CYP2E1
SERVITJA_ISLET_HNF1A_TARGETS_DN	104	0.626667	2.70289	0.000232666	0.00110632	0.000523932	5420	tags=49%, list=11%, signal=44%	CBS/MLXIPL/SGK2/SLC37A4/SERPINA10/SLC38A4/PCSK9/HGFAC/VIL1/TAT/UGT1A1/GATM/HNF4A/PKLR/ENPEP/CYP4V2/CPB2/NR1H4/CPN1/FOXA3/PPP1R1A/CDO1/FBP1/DDC/ANKS4B/TTR/CLTRN/DPP4/TMED6/GC/AMBP/CDHR2/ADH1C/SLC2A2/RNASE4/ELOVL2/TM4SF4/SLC26A1/GRTP1/SLC40A1/PCSK1/GOLT1A/RAB37/FBP2/COL27A1/SFXN2/SLC12A7/KDM2B/SLCO1A2/RNF186/PFKL
MOOTHA_MITOCHONDRIA	448	0.518076	2.69312	0.000260824	0.00110632	0.000523932	7300	tags=36%, list=14%, signal=31%	ACSL1/SARDH/LCAT/POR/ACAA1/ALDH2/ETFDH/MLYCD/ACADS/AMT/EHHADH/ALDH4A1/PCK2/ACAA2/CLPX/PDK4/ACADM/TST/TAT/CYP27A1/CAT/DHODH/GATM/PKLR/CA5A/GLS2/PC/BDH1/ACADL/GLUD1/HMGCS2/PLA2G2A/COQ8A/ABAT/MMUT/MAOA/CPS1/GLYAT/IVD/ACADVL/POLRMT/CPOX/OTC/MPST/MAOB/SLC25A20/CKMT2/AMACR/MTHFD1/FDX1/ECHS1/GOT2/SLC25A13/PCCA/ACAT1/CPT1A/ETFB/SLC25A10/SDHA/ACADSB/TK2/HMGCL/AK4/ALAS1/SLC25A15/GCDH/DBT/TXNRD2/BCKDHB/SHMT…
KEGG_ASCORBATE_AND_ALDARATE_METABOLISM	25	0.832978	2.68006	0.00022482	0.00110632	0.000523932	5099	tags=80%, list=10%, signal=72%	ALDH2/UGT1A4/UGT1A3/UGT1A1/UGT2B10/ALDH1B1/UGT2B7/UGT1A9/ALDH3A2/UGT2B4/UGT1A6/UGT2B15/UGT1A5/UGT2A1/ALDH7A1/UGT2B11/UGT1A7/UGT1A10/ALDH9A1/UGT2B17
KEGG_LYSINE_DEGRADATION	44	0.732703	2.67984	0.000228624	0.00110632	0.000523932	7591	tags=66%, list=15%, signal=56%	AADAT/ALDH2/EHHADH/PIPOX/ALDH1B1/OGDHL/ECHS1/BBOX1/ACAT1/ALDH3A2/GCDH/SETD7/AASS/HADHA/ALDH7A1/HADH/PLOD1/SETDB2/ACAT2/ALDH9A1/KMT5B/SETD2/EHMT1/SETD1B/TMLHE/AASDHPPT/PLOD2/PLOD3/OGDH
KEGG_HISTIDINE_METABOLISM	29	0.801187	2.67739	0.000222866	0.00110632	0.000523932	2703	tags=55%, list=5%, signal=52%	HAL/ALDH2/FTCD/CNDP1/UROC1/ALDH1B1/MAOA/MAOB/DDC/ALDH3A2/HNMT/ACY3/AMDHD1/TRMT11/ASPA/ALDH7A1
REACTOME_PROTEIN_LOCALIZATION	163	0.575884	2.66294	0.00023872	0.00110632	0.000523932	7285	tags=41%, list=14%, signal=35%	AGXT/ACAA1/LDHD/MLYCD/SLC27A2/EHHADH/CAT/PHYH/PIPOX/PECR/ACOX1/HAO2/BAAT/HSD17B4/OTC/EPHX2/AMACR/LONP2/SCP2/ACOX2/IDH1/SLC25A13/ACBD5/ALDH3A2/DAO/HMGCL/HAO1/CHCHD10/PEX14/PXMP2/PEX3/ECH1/GET4/FXN/ABCD3/HACL1/PMPCA/BAG6/ACOT2/ECI2/PAOX/CRAT/TOMM70/AGPS/CROT/CYB5A/DHRS4/DECR2/PEX19/GSTK1/DDO/PEX5/HMOX1/PRNP/TIMM44/USP9X/TIMM8A/SGTA/PMPCB/PEX6/COX19/PEX16/PEX12/GRPEL1/PEX26/ATP5F1A/PITRM1
ACEVEDO_NORMAL_TISSUE_ADJACENT_TO_LIVER_TUMOR_UP	172	0.570031	2.64864	0.000243724	0.00110632	0.000523932	9222	tags=43%, list=18%, signal=35%	LIPG/SLC51A/ABCB11/CYP3A5/PRKAB2/METTL7A/MYO1B/AFM/NADK2/MBL2/ACSM5/CFHR2/IDO2/CUX2/IMPA1/APOM/CTSO/FGL1/MET/MYO18A/TMEM37/HHEX/C9/PIK3AP1/PLA1A/SLC17A4/PCTP/DPP4/CYP3A7/SLC15A1/CDHR2/FKBP5/PEX3/RAB33B/CHKA/SESN2/PLEKHA5/A2M/GPX2/PHF3/OS9/LAP3/EIF2AK4/ZPR1/PNISR/CYP51A1/SLPI/SHROOM3/MINDY3/ALCAM/PON2/RIC8B/ADPRM/MYCBP2/RBM6/TBPL1/PNN/SEPT11/PERP/MARCKS/RBM5/GAK/EDEM2/CISD1/RMDN1/EIF3A/NISCH/GCN1/…
BIOCARTA_COMP_PATHWAY	19	0.876994	2.6429	0.000223514	0.00110632	0.000523932	1462	tags=74%, list=3%, signal=72%	C2/C5/MASP2/MBL2/C3/C1R/C1S/CFB/C4B/MASP1/C8A/C9/C4A/C6
KEGG_PENTOSE_AND_GLUCURONATE_INTERCONVERSIONS	28	0.797972	2.64009	0.000225175	0.00110632	0.000523932	8117	tags=82%, list=16%, signal=69%	XYLB/UGT1A4/UGT1A3/UGT1A1/UGP2/UGT2B10/UGT2B7/UGT1A9/UGT2B4/UGT1A6/CRYL1/UGT2B15/DCXR/UGT1A5/UGT2A1/UGT2B11/UGT1A7/UGT1A10/UGT2B17/UGT1A8/GUSB/UGDH/UGT2A3
MCBRYAN_PUBERTAL_BREAST_5_6WK_DN	123	0.594851	2.63958	0.000234797	0.00110632	0.000523932	9995	tags=54%, list=20%, signal=43%	IL6R/GPD1/PANK1/FGG/DAPK1/HSD17B11/SLC38A10/EIF4EBP2/NFATC3/GYS2/ZBTB20/AKT2/FZD4/MAPK14/TNS1/QKI/SIRPA/PTEN/OGFR/CYTH1/CALD1/RESF1/CYGB/ITSN2/SMC6/FIGN/BRD4/NFIC/NDST1/SECISBP2L/SDC4/EGLN1/SPPL2A/CUX1/IL6ST/MBTPS1/PPP6R3/NFIX/CLEC3B/RGS5/EIF4G1/ZEB2/DHX36/AKAP9/KEAP1/THRAP3/HEMK1/WASL/RAD23A/MAPK8/RBM5/NFIB/MEF2C/KDM5A/TBL1X/PCYT1A/PRPF19/DDX6/FSCN1/HDLBP/IP6K1/DBP/VAPB/SEC61A1/LPGAT1/PANK3
REACTOME_PLASMA_LIPOPROTEIN_ASSEMBLY	19	0.874591	2.63566	0.000223514	0.00110632	0.000523932	2535	tags=84%, list=5%, signal=80%	APOE/ABCA1/APOC1/P4HB/APOC2/APOA2/MTTP/BMP1/APOA1/APOB/APOC4/APOC3/ZDHHC8/APOA4/PRKACA/A2M
PIONTEK_PKD1_TARGETS_UP	37	0.747056	2.63469	0.000227583	0.00110632	0.000523932	2215	tags=51%, list=4%, signal=49%	CYP2D6/HAAO/RDH16/ERRFI1/ALDH8A1/SLC27A2/SORD/ACSM5/KLF15/SLC13A3/HAO2/ACOX2/MT2A/SLC17A1/UGT1A6/ENTPD5/GK/FKBP5/AASS
GRUETZMANN_PANCREATIC_CANCER_DN	197	0.555113	2.63464	0.0002457	0.00110632	0.000523932	4538	tags=40%, list=9%, signal=36%	MST1/H19/CLU/C5/PCK2/F12/GRB14/ACADM/CXCL2/ACO1/F11/GJB1/GATM/MT1X/RARRES2/RGN/PPP2R1B/KANK1/ACOX1/MAOA/PDIA5/HSD17B4/NUCB1/EPHX2/RDX/FGL1/PTP4A1/ALDH1A1/CDO1/P4HB/INSR/ITPRID2/NR5A2/SMPDL3A/ONECUT1/ACSM3/HHEX/SERPINA6/SERPINA5/PEBP1/C6/DENND4A/UGT2B15/MAT1A/PEPD/LMAN1/PTH1R/SMAD4/KAT2B/SEL1L/GAMT/HERPUD1/LSS/GPX3/PPIF/PRPSAP1/KCNJ4/CRAT/LAMP1/GSTZ1/SMPD1/ITSN2/CRYZ/DDT/SEC62/RAF1/SLC33A1/ARSA/CX…
BASAKI_YBX1_TARGETS_DN	386	0.514095	2.63457	0.000256805	0.00110632	0.000523932	9779	tags=48%, list=19%, signal=39%	SNTB1/SLC25A27/SGK2/CD302/H19/ABCA5/H6PD/COBLL1/ASS1/RDH10/PCSK6/GRB14/PROS1/CAT/HGD/KANSL1L/NT5E/GABARAPL1/DHRS3/CGNL1/TFPI/MMAA/SLC6A12/APOOL/PTP4A1/ST3GAL6/SALL1/MET/SLC30A1/TENT4B/ALDH1A2/SMPDL3A/GBE1/SH3PXD2A/TMEM37/ACSM3/HELZ/CAMK2N1/MEGF9/CLINT1/ZBTB20/SELENOP/AK4/SLC3A1/LMAN1/BDH2/SPRY2/DPP4/TMOD1/CCDC50/CRYZL2P/PLCG2/XRN1/TSPAN6/ALDOC/SLC45A3/CXADR/SERPINA1/TM4SF4/PIK3R1/FAM13A/PTEN/SLC1…
PID_HNF3B_PATHWAY	45	0.713425	2.62303	0.000228258	0.00110632	0.000523932	5239	tags=62%, list=10%, signal=56%	ACADM/TAT/CEBPA/HNF4A/PKLR/BDH1/HNF1A/FOXA3/ACADVL/CPT1A/APOA1/FOXA2/TTR/ALAS1/PCK1/F2/ALDOB/INS/SLC2A2/NR3C1/G6PC/ALB/IGFBP1/HADH/HNF1B/AFP/CEBPB/FOXF1
BIOCARTA_INTRINSIC_PATHWAY	23	0.830157	2.61998	0.00022482	0.00110632	0.000523932	2759	tags=70%, list=5%, signal=66%	KLKB1/PROC/SERPING1/F12/PROS1/F11/FGG/F10/F5/FGA/FGB/F9/SERPINC1/KNG1/F2/COL4A4
REACTOME_GLUCURONIDATION	25	0.814289	2.61993	0.00022482	0.00110632	0.000523932	8117	tags=88%, list=16%, signal=74%	SLC35D1/UGT1A4/UGT1A3/UGT1A1/UGP2/UGT2B10/UGT2B7/UGT1A9/UGT3A1/UGT2B4/UGT1A6/UGT2B15/UGT1A5/UGT2A1/UGT2B11/UGT1A7/UGT1A10/UGT2B17/ABHD10/UGT1A8/UGDH/UGT2A3
RUTELLA_RESPONSE_TO_HGF_VS_CSF2RB_AND_IL4_UP	409	0.507189	2.61323	0.00026001	0.00110632	0.000523932	10457	tags=46%, list=21%, signal=37%	SDC2/SNTB1/APOE/PCK2/AQP9/ACAA2/ABCC3/VNN1/CYP27A1/ACO1/CES1/C3/MT1X/MT1H/SLC43A3/C1S/KLF9/CD14/NR1H3/HSD11B1/PINK1/PDIA5/PID1/PLPP3/ACADVL/PLIN2/RDX/APOC1/ATP13A3/MT1F/ARHGEF40/STS/FBP1/KYNU/SLC30A1/FDX1/GOT2/ACAT1/MT2A/ELOA/SC5D/ALDH3A2/AKR1C1/MT1G/CD81/STOM/ST6GAL1/FYN/TGM2/ALAS1/IQGAP2/SIK3/CCL15/SIGIRR/MAFB/SLC31A1/SUN2/DOCK4/APLP2/MAPRE2/DECR1/CD163/CTSL/MYO15B/ETS2/CTBS/HADHA/TLE4/CPM/PPIF…
SUMI_HNF4A_TARGETS	29	0.781522	2.61167	0.000222866	0.00110632	0.000523932	4089	tags=62%, list=8%, signal=57%	DIO1/SLC13A5/BHMT/ACSM2B/SLCO2B1/CYP4F3/ABCG8/ABHD2/MUC20/SLC47A1/BDH1/PLA2G12B/AKR1D1/FABP1/IL22RA1/ZNF22/SOAT2/KANK4
KEGG_ALANINE_ASPARTATE_AND_GLUTAMATE_METABOLISM	32	0.763203	2.60818	0.000223864	0.00110632	0.000523932	2800	tags=53%, list=6%, signal=50%	AGXT/GPT/ALDH5A1/ALDH4A1/ASS1/GPT2/GLS2/ASL/AGXT2/GLUD1/ABAT/CPS1/GOT1/GOT2/ACY3/ASPA/GLUD2
STEIN_ESRRA_TARGETS_UP	385	0.508973	2.6066	0.000257599	0.00110632	0.000523932	9825	tags=45%, list=20%, signal=37%	ACAA1/ETFDH/METTL7A/STEAP3/MLYCD/SLC46A3/ACACB/EHHADH/LPCAT3/CLUH/ACAA2/ACADM/UGP2/PGM1/MARC2/IMPA1/HPN/GABARAPL1/MMUT/SEC14L2/NDRG2/RAB17/SLC25A20/PCYT2/NUCB1/CKMT2/GOT1/MMACHC/ESRRA/VWA8/FDX1/GOT2/ACAT1/CPT1A/SDHA/ALDH3A2/ACADSB/FAHD2A/CYP1A1/AKAP1/ACY1/ILVBL/IQSEC1/C4orf19/ALAS1/BDH2/PCTP/INPP1/MAFB/EPAS1/SLC31A1/GK/SCML1/ALDOC/TRIM14/DECR1/MPC1/SULT1A2/MTRF1/MFN2/CTSL/ETS2/ADCY1/PPIF/PRPSAP1/…
ZHENG_FOXP3_TARGETS_IN_THYMUS_UP	194	0.548711	2.60281	0.000243487	0.00110632	0.000523932	8875	tags=43%, list=18%, signal=36%	ERRFI1/ABTB2/FAM8A1/NT5E/MAN1A1/CPOX/DIPK1A/IFNAR2/IBTK/ZBTB20/RNF125/SIK3/KNG1/EVI5/GPHN/JMJD1C/MALT1/SEC63/NR3C1/NAA30/PIK3R1/LATS2/LRCH1/TPP2/L3MBTL3/FAM76B/OTULIN/TTC33/WBP4/PPP3CC/ZYG11B/AKAP13/STAT4/SGMS1/SOCS2/EXT1/MAP3K5/SMC5/STRN3/BLOC1S5/HERPUD2/VPS54/NFKBIZ/PTGER2/CHD9/DUSP22/NUP153/LNX2/ARHGAP5/TMEM64/CAST/ZC3HAV1/MBNL1/ATP6V1A/MAN1A2/ETS1/CELF2/ESD/ASXL2/GPR18/KIF3B/HBP1/SAMHD1/ETNK1…
SANSOM_APC_TARGETS_DN	345	0.513079	2.60099	0.000253807	0.00110632	0.000523932	8382	tags=43%, list=17%, signal=36%	ABCC2/CD302/CAPN3/SLC51A/ACAA1/RDH16/MOGAT2/CDHR5/GPD1/PPARA/ABCC3/LRP1/TFR2/NR1I3/CYP3A4/PIPOX/PC/CIDEB/NR1H3/VAV2/ACOX1/SEC14L2/RDH5/XDH/EPHX2/PHETA1/MYO7A/AADAC/ACOT13/SLC7A9/DDC/FLVCR2/DHRS1/MTTP/DAO/MOCOS/GALM/ST6GAL1/RBP4/WDTC1/ENTPD5/PEPD/FABP1/ACY3/DTX1/SYNPO/PCOLCE/ERCC5/ALDOB/SLC2A2/ZG16/G6PC/SEPT4/ALB/NKIRAS1/DNAJB9/ADH4/DAB1/SIRPA/SPHK2/CMBL/SDF4/TM4SF5/MERTK/TCEA3/MEP1B/CHPT1/CYB5R3/…
WENG_POR_TARGETS_LIVER_DN	23	0.823324	2.59841	0.00022482	0.00110632	0.000523932	3829	tags=70%, list=8%, signal=64%	CYP4A11/ATF5/EHHADH/VNN1/SDS/BDH1/HSD17B11/CYP7B1/RETSAT/IGF1/APOA4/ACOT2/PNPLA7/SDC4/SERPINA3/ACOT1
MORI_PRE_BI_LYMPHOCYTE_DN	77	0.634113	2.59579	0.000229568	0.00110632	0.000523932	9114	tags=55%, list=18%, signal=45%	TUT7/PTK2B/TK2/DTX1/GUCD1/RIOK3/S1PR1/SAT1/IL4R/NBR1/FAM107B/TIRAP/IL10RA/RALGPS2/ERP29/SMIM14/BLK/NFKBIZ/FCGR2B/CLK1/TANK/TMEM50B/LYN/ERO1B/IGKC/DIP2B/FBXO11/SAMHD1/BIRC3/ABLIM1/BTG1/UBE2H/RGS14/ZFP36/MCL1/FAM3C/PTPRC/UBP1/CD72/ADCY7/CASP9/RBM39
NAKAYAMA_SOFT_TISSUE_TUMORS_PCA2_DN	84	0.622578	2.59214	0.000230627	0.00110632	0.000523932	6702	tags=56%, list=13%, signal=49%	PLIN1/METTL7A/ACACB/AGT/GPD1/PALMD/PDK4/CES1/CEBPA/G0S2/ABCA8/PPP2R1B/ABCC6/PLA2G2A/MAOA/IGF1/MAOB/PPP1R1A/AKR1C3/FAM149A/AKR1C1/ANGPTL4/AQP7/RBP4/PCK1/GYG2/FZD4/ADH1B/ADH1C/C1orf115/ASPA/CCL14/GPX3/VIPR1/PPARG/CLDN5/NPR1/NPY1R/AOC3/MARC1/IGHG1/CETP/CLEC3B/IGKC/TFPI2/IFI44L/IGLC2
GABRIELY_MIR21_TARGETS	289	0.521719	2.59166	0.000251636	0.00110632	0.000523932	9722	tags=49%, list=19%, signal=40%	MPDZ/PRKAB2/GPAM/COBLL1/PPARA/WWC2/CYP4V2/FOXN3/GNE/ZBTB44/ZADH2/ARHGEF12/ARID4A/HECTD1/EIF4EBP2/PTPN3/ACBD5/TRPM7/MEGF9/ZBTB20/CLCN5/ST6GAL1/SAMD5/UBR3/CPEB3/RAPH1/ZRANB1/RMND5A/FERMT2/PLD1/TMEM56/WNK3/SLC31A1/SEC63/TPRG1L/RPS6KA3/PPP1R3B/NAA30/SFXN1/PIK3R1/POLR3B/ALS2/CEMIP2/LIN7C/CALD1/DDAH1/TACC1/VPS13A/FNBP1/TTC33/ITSN2/TRIM2/FIGN/SLC5A3/SOWAHC/ZYG11B/MAP3K2/KLHL8/LIFR/GOLGA4/RSPRY1/TGFBR2/Z…
PAPASPYRIDONOS_UNSTABLE_ATEROSCLEROTIC_PLAQUE_UP	53	0.682544	2.59132	0.000228102	0.00110632	0.000523932	8771	tags=60%, list=17%, signal=50%	CXCL2/IDH1/CD163/CREG1/RAPGEF1/SAT1/LAMP1/SLC39A8/CCL18/FUCA1/PLA2G7/CTSS/NPL/IFIT3/CTSB/LGMN/GRN/MPEG1/SOD2/GALE/DUSP6/PAPSS2/TRAM1/ACP5/TDP2/TRAK2/RBMS1/MLEC/RSAD2/SLC17A5/SGK1/NCKAP1L
REACTOME_CREATION_OF_C4_AND_C2_ACTIVATORS	70	0.645454	2.59066	0.000227739	0.00110632	0.000523932	11848	tags=64%, list=24%, signal=49%	MASP2/MBL2/C1R/C1S/FCN2/MASP1/COLEC10/FCN3/IGHV4-39/IGLV1-47/COLEC11/C1QC/IGHG1/IGLV3-1/IGKV3-20/CRP/C1QB/IGHV2-70/IGKV2-28/IGLC2/IGHV3-7/IGHV3-23/IGHV4-59/C1QA/IGHG2/IGKV1-39/IGLV2-23/IGHV3-48/IGKV2-30/IGKV1-5/IGKV2D-30/IGLV1-40/IGLV1-51/IGKV1-12/IGLV2-11/IGKV4-1/IGHV3-33/IGLV2-14/IGKV1-16/IGLC3/IGLV3-19/IGHV2-5/IGKV1D-39/IGKV1-17/IGHV4-34
KEGG_BUTANOATE_METABOLISM	34	0.748642	2.59049	0.000225479	0.00110632	0.000523932	5315	tags=65%, list=11%, signal=58%	ACSM2A/ALDH2/ALDH5A1/ACADS/EHHADH/ACSM5/BDH1/ALDH1B1/HMGCS2/ABAT/ECHS1/ACAT1/ACSM3/ALDH3A2/HMGCL/BDH2/HADHA/ALDH7A1/HADH/ACAT2/ALDH9A1/PDHA1
KEGG_ARGININE_AND_PROLINE_METABOLISM	54	0.679024	2.58982	0.000228258	0.00110632	0.000523932	2910	tags=52%, list=6%, signal=49%	NAGS/ALDH2/AGMAT/ALDH4A1/ASS1/GATM/ARG1/GLS2/ASL/ALDH1B1/GLUD1/PRODH2/MAOA/CPS1/OTC/MAOB/CKMT2/GOT1/GOT2/ALDH3A2/DAO/ACY1/SAT2/GAMT/ALDH7A1/SAT1/GLUD2/LAP3
HOUSTIS_ROS	32	0.754643	2.57893	0.000223864	0.00110632	0.000523932	6998	tags=62%, list=14%, signal=54%	HPX/CAT/XDH/HP/MT2A/TXNRD2/GPX3/GPX2/CP/GCLM/FTL/SDC4/HMOX1/SOD1/SOD2/TXNIP/PRDX6/SCAF4/TXN2/PRDX3
REACTOME_BRANCHED_CHAIN_AMINO_ACID_CATABOLISM	19	0.854899	2.57632	0.000223514	0.00110632	0.000523932	4824	tags=84%, list=10%, signal=76%	ALDH6A1/IVD/ACAT1/ACADSB/HIBCH/DBT/BCKDHB/ACAD8/AUH/MCCC1/HIBADH/BCKDHA/PPM1K/BCAT2/MCCC2/DLD
STEARMAN_LUNG_CANCER_EARLY_VS_LATE_UP	124	0.579536	2.57575	0.000235294	0.00110632	0.000523932	9394	tags=50%, list=19%, signal=41%	WDR81/SERPINA10/WWC2/SMO/PTPRD/PGRMC1/DDC/CADM1/IFNAR2/ITIH4/GFRA2/KDR/PLD1/SMAD4/KLF13/ANTXR2/KAT2B/TPRG1L/APLP2/VPS4A/SIRPA/FXN/LATS2/HTRA1/GLG1/SCARB2/VPS26B/TPST1/OSBPL11/C6orf120/EXT1/SLC22A23/CCNL2/MED23/CLK1/PRPSAP2/CAST/ARHGAP21/YTHDC1/MTHFR/ETNK1/PNN/KMT2A/RRP1B/ATXN2/HNRNPH1/MINDY1/SF3B1/IREB2/GTF2E2/NFIB/CTCF/PKD2/OTUD5/WDR48/RNF149/CGGBP1/UPF3B/C1QTNF3/CLOCK/PIAS2/MAPK1
WENG_POR_TARGETS_GLOBAL_DN	23	0.816085	2.57556	0.00022482	0.00110632	0.000523932	3829	tags=61%, list=8%, signal=56%	CYP4A11/ATF5/EHHADH/VNN1/HSD17B11/CYP7B1/RETSAT/FGL1/MGLL/HSDL2/APOA4/ACOT2/GRN/ACOT1
RAY_TUMORIGENESIS_BY_ERBB2_CDC25A_DN	255	0.525377	2.57501	0.00024728	0.00110632	0.000523932	7935	tags=44%, list=16%, signal=38%	SDC2/ACSL1/PLIN4/ERRFI1/RXRA/FAM20A/C11orf54/TMEM82/PHYH/G0S2/KLF15/BDH1/CFB/PINK1/CPT2/MMACHC/SCP2/NNMT/CDO1/SLC23A2/BBOX1/DHRS1/ACBD5/CRY2/SCARF1/INPP5B/RBP4/RORC/RSC1A1/SURF4/PROSER2/IRAK2/CDC40/MTFR1L/EPHA2/HERPUD1/FAM13A/AIFM2/RHOU/CACFD1/LIN7C/ZNF395/CBX7/PLEKHF1/MBP/MRTO4/GRTP1/EBNA1BP2/ZNF770/BLNK/SKI/PPM1L/FUCA1/ENHO/SLC6A2/CHN2/IFIH1/PPM1K/NFIC/EPB41/CFLAR/CIDEC/CXCL12/USP20/AGO4/ITM2B/…
KEGG_GLYCOLYSIS_GLUCONEOGENESIS	62	0.65552	2.5733	0.000225581	0.00110632	0.000523932	5537	tags=48%, list=11%, signal=43%	ALDH2/PCK2/PGM1/PKLR/ADH6/ALDH1B1/FBP1/ALDH3A2/GALM/ADH5/PCK1/ADH1A/ALDOB/ADH1B/ACSS2/ADH1C/ALDOC/G6PC/ADH4/ALDH7A1/ENO3/HK3/LDHAL6B/FBP2/AKR1A1/DLD/ALDH9A1/PDHA1/PFKL/ADH7
LU_AGING_BRAIN_UP	261	0.522846	2.56707	0.000249128	0.00110632	0.000523932	7319	tags=40%, list=15%, signal=35%	SDC2/CBS/CD302/ADGRA3/METTL7A/HSD17B6/AGT/ALDH4A1/CFH/ACAA2/TST/ECM2/GATM/MTSS1/RGN/PHLPP1/MT1E/KANK1/GNE/FXYD1/DHRS3/MAOA/RDX/SCP2/INSR/ITPRID2/MFAP3L/ZCCHC24/HP/BBOX1/MT2A/MT1G/ZBTB20/STOM/SELENOP/FYN/KDSR/TGM2/FERMT2/RAPGEF4/PAIP2B/ELOVL2/SEPT4/QKI/ABCD3/TLE4/RBL2/S1PR1/HTRA1/CALD1/PHF3/TMEM47/PDLIM5/SERINC5/TCAF1/IRF7/CLDN5/IL33/NT5C2/SLC16A1/FGFR3/TGFBR2/AFF1/LPIN1/TOPORS/MAP3K5/SMC5/MT1B/ER…
DOUGLAS_BMI1_TARGETS_DN	312	0.511154	2.56022	0.000251004	0.00110632	0.000523932	9162	tags=43%, list=18%, signal=35%	CLU/SHPK/PANK1/DDI2/IL1RAP/ACSS3/AGPAT3/IVD/RAPGEF2/ARNTL/TKFC/ITGA1/PLSCR4/PAN2/MICU1/ENPP1/RSC1A1/FGGY/SERINC1/CBR4/INSIG1/DNAJC16/SIDT2/SUN2/HERC6/SP100/ECH1/ARL5B/ANKS1A/CEP57/NOL4/LIN7C/INSIG2/DHX58/OPTN/TACC1/STAT6/OXNAD1/ZFYVE1/PAFAH2/SLC39A8/OTUD4/IFIT2/IFIT1/CYB5D2/ARAP1/PLEKHA1/CMTR1/PCMTD2/IFIT3/SLC33A1/TPP1/CREBL2/FOXRED1/SNRK/API5/BIRC2/TBC1D13/NIT1/RETREG3/MED16/FCHSD2/LRIG3/SMIM14/…
REACTOME_DEFECTS_IN_VITAMIN_AND_COFACTOR_METABOLISM	22	0.820159	2.5589	0.000224467	0.00110632	0.000523932	4447	tags=64%, list=9%, signal=58%	AMN/PC/MMUT/MMAA/MMACHC/ABCD4/PCCA/MCCC1/LMBRD1/PCCB/BTD/MMAB/TCN2/MCCC2
DAUER_STAT3_TARGETS_DN	47	0.688924	2.55575	0.000228154	0.00110632	0.000523932	9414	tags=74%, list=19%, signal=61%	AQP3/GRB14/PDK4/HPGD/HERC6/HERC5/TRIM14/PGRMC2/TRANK1/LAP3/IFIT1/IFIH1/IFIT3/MX1/IFI44/PARP12/BCL2L13/DDX58/OASL/OAS2/SP110/TDRD7/DDX60/HEXIM1/TRIM22/PRPF4B/TNFSF10/TLR3/IFI35/TRIM5/SAMD9/OAS3/STAT1/DNAJB4/USP18
LANDIS_BREAST_CANCER_PROGRESSION_DN	71	0.6343	2.55449	0.000227169	0.00110632	0.000523932	6993	tags=58%, list=14%, signal=50%	COL18A1/GHR/ACAA1/H6PD/GPAM/ALAD/PHYH/PGM1/SORBS1/MAN1A1/NR1H3/EPHX2/ST3GAL6/IDH1/ETFB/ALAS1/FZD4/PDE8A/BCKDHB/DECR1/QKI/UCK1/HTRA1/PLAC8/ADIPOR2/GNAI1/CIDEC/CXCL12/ZEB1/NRP1/MRC1/DGAT1/AHNAK/BNIP2/CLEC3B/GAS6/ANGPTL2/MFNG/LAMB1/SRPX/PPP2R5A
ICHIBA_GRAFT_VERSUS_HOST_DISEASE_35D_DN	56	0.665765	2.55238	0.000228154	0.00110632	0.000523932	6105	tags=57%, list=12%, signal=50%	ACSL1/IGFALS/CYP4A22/CYP8B1/VNN1/AVPR1A/CES1/LIPC/CYP2C8/CYP7B1/HMGCS2/RETSAT/HAO2/HP/SLC22A9/CES3/PPP1R3C/FABP1/G6PC/ELOVL2/RELN/SLC1A2/ELAC2/MKLN1/LIFR/PDZK1/ADCY9/KLF10/GSTM1/IGKC/GAS1/FBXO21
RODRIGUES_DCC_TARGETS_DN	119	0.578051	2.5488	0.000235183	0.00110632	0.000523932	9157	tags=52%, list=18%, signal=43%	SNTB1/BACE1/PRKAB2/CAT/FMO5/CYP4V2/FOXN3/GADD45A/ACOX1/ABAT/GPR88/LONP2/NR5A2/ALDH3A2/SELENOP/FYN/IQGAP2/GGCX/ECH1/PTMS/MBP/NNT/PIM1/TRIM2/PTPRG/CMTM6/PCMTD2/CLSTN3/SMARCA2/CREBL2/CROT/ZNF277/NRP1/PKN2/EPS8/LGR5/KLF7/TANK/SLC2A10/SEPT6/NR2F1/CARD8/SSH1/HBP1/BCL6/MID1/AHR/BTG1/CYP2R1/PIK3CA/GNG2/UTRN/TRAK2/CD82/HOXA3/TBX3/TRIM23/RAD50/RNF5/CDC42EP3/HERC4/ATF2
MOSERLE_IFNA_RESPONSE	31	0.751613	2.54842	0.000224618	0.00110632	0.000523932	10857	tags=90%, list=22%, signal=71%	HERC5/IFIT2/IFIT1/IFIH1/IFIT3/IFIT5/MX1/CMPK2/IFI44/DDX58/OASL/ZC3HAV1/OAS2/DDX60L/DDX60/RTP4/IFI44L/EPSTI1/TRIM22/GBP1/TNFSF10/RSAD2/SAMD9/IFI16/STAT1/USP18/CD274/SAMD9L
KEGG_PYRUVATE_METABOLISM	40	0.709877	2.54821	0.000229253	0.00110632	0.000523932	5315	tags=50%, list=11%, signal=45%	LDHD/ALDH2/ACACB/PCK2/ACOT12/PKLR/PC/ALDH1B1/GRHPR/ACAT1/ALDH3A2/PCK1/ACSS2/HAGH/ALDH7A1/LDHAL6B/ACAT2/DLD/ALDH9A1/PDHA1
GINESTIER_BREAST_CANCER_20Q13_AMPLIFICATION_DN	182	0.542244	2.54663	0.000243962	0.00110632	0.000523932	10767	tags=57%, list=21%, signal=45%	ACSL5/FURIN/ECHDC1/SLC23A2/AMY2B/WDTC1/HLX/EPM2AIP1/KIAA1147/BAG6/CYTH1/RAPGEF1/TBRG1/ITSN2/SMC6/SNHG26/DHX16/AKAP13/MLXIP/TNIP1/AGO4/ATXN7/SNAPC4/TINAGL1/CHD2/QSOX2/TAPBP/COG3/TCIRG1/SLC18B1/BRD2/TSPOAP1/MBD4/PML/TLN1/NUP214/BTAF1/ASMTL-AS1/TEPSIN/CAPN15/ZNF436-AS1/GBA2/SH3BP5-AS1/CCNL1/MADD/CLASRP/MYO9B/MON2/DMD/ENGASE/EIF4G1/SF1/DXO/SLC15A4/LINC01355/NAA16/PNN/RBM26/CCDC93/ZNF318/DNM2/POGLUT1/…
KEGG_PORPHYRIN_AND_CHLOROPHYLL_METABOLISM	41	0.705339	2.54523	0.000228415	0.00110632	0.000523932	8117	tags=68%, list=16%, signal=57%	UGT1A4/UGT1A3/UGT1A1/ALAD/UGT2B10/UGT2B7/CPOX/UGT1A9/UGT2B4/UGT1A6/UGT2B15/ALAS1/UGT1A5/UGT2A1/CP/MMAB/UGT2B11/UGT1A7/UGT1A10/COX15/HMOX1/UGT2B17/UGT1A8/GUSB/UROD/FECH/COX10/UGT2A3
BIOCARTA_EXTRINSIC_PATHWAY	13	0.943318	2.54307	0.000224568	0.00110632	0.000523932	1618	tags=85%, list=3%, signal=82%	PROC/PROS1/FGG/F10/F5/FGA/FGB/F7/TFPI/SERPINC1/F2
REACTOME_SULFUR_AMINO_ACID_METABOLISM	28	0.766894	2.53727	0.000225175	0.00110632	0.000523932	1514	tags=50%, list=3%, signal=49%	CBS/BHMT2/CBSL/BHMT/TST/CTH/MPST/GOT1/CDO1/GOT2/SLC25A10/CSAD/ADI1/MAT1A
VECCHI_GASTRIC_CANCER_EARLY_DN	374	0.49649	2.53727	0.000255624	0.00110632	0.000523932	6971	tags=38%, list=14%, signal=33%	PLIN1/GHR/IL6R/CD302/SLC51A/PBLD/CYP2C18/CLU/METTL7A/MAF/CYP2C9/GPER1/HLF/TMPRSS6/CFH/PDK4/SULT2A1/FMO5/HHIP/MT1X/CYP2C19/MT1H/CYP3A4/LEPR/KLF15/ABCA8/KLF9/CFL2/SORBS2/MT1E/MYRIP/MT1M/SMLR1/ECHDC3/SULT1E1/SLC2A12/BCHE/GABARAPL1/NLRX1/ABAT/ALDH6A1/CGNL1/MAOA/PID1/PLPP3/AGTR1/CKMT2/MT1F/NR3C2/GSTA1/HPGD/ST3GAL6/ALDH1A1/ACOX2/AADAC/GNAO1/ALDH1A2/ACKR4/ETNPPL/MTTP/AKR1C1/SELENOP/ZNF385B/APOA1/ENTPD5/…
KEGG_TYROSINE_METABOLISM	42	0.699455	2.5352	0.000227169	0.00110632	0.000523932	4487	tags=52%, list=9%, signal=48%	DBH/TAT/HGD/ADH6/MAOA/MAOB/GOT1/AOX1/GOT2/DDC/TH/ADH5/ADH1A/HPD/ADH1B/ADH1C/TRMT11/ADH4/FAH/GSTZ1/AOC2/AOC3
YAMASHITA_LIVER_CANCER_WITH_EPCAM_DN	16	0.88153	2.5297	0.000222618	0.00110632	0.000523932	1667	tags=81%, list=3%, signal=79%	ACSM2A/ECHDC2/HSD17B6/ALDH1L1/CES1/SCLY/HMGCS2/UGT2B7/APOC1/GSTA2/SERPINC1/C4A/HRG
CHIANG_LIVER_CANCER_SUBCLASS_INTERFERON_DN	53	0.665855	2.52796	0.000228102	0.00110632	0.000523932	6129	tags=51%, list=12%, signal=45%	MLXIPL/IGF2/HLF/MOGAT1/SLC16A10/ACOX1/SLC13A3/CDC14B/AMACR/TRPM7/ZNF385B/MME/ONECUT2/HSDL2/C3orf85/PHYHIPL/RHBG/GRB10/EXPH5/ZNRF3/CRLS1/SLC16A11/TMEM150C/LGR5/BTNL9/NR2F1/TENM2
GERHOLD_ADIPOGENESIS_UP	48	0.677361	2.5256	0.000227221	0.00110632	0.000523932	5752	tags=48%, list=11%, signal=42%	ACSL1/GHR/ALDH2/ACADS/APOE/AGT/PC/GADD45A/IGF1/ACADVL/CPT2/PLIN2/SCP2/BCKDHA/CRAT/GCLM/PPARG/CIDEC/STAT3/ITGA7/CEBPB/PDHA1/SCD
IIZUKA_LIVER_CANCER_PROGRESSION_L1_G1_UP	20	0.827884	2.52342	0.000225124	0.00110632	0.000523932	4530	tags=80%, list=9%, signal=73%	MAF/C1R/MT1H/MT1E/ORM1/AMFR/MT1F/IGFBP4/IGFBP3/RAB14/CPEB3/FERMT2/SLC31A1/C6orf120/ID2/AGL
KEGG_BETA_ALANINE_METABOLISM	22	0.808776	2.52338	0.000224467	0.00110632	0.000523932	5067	tags=82%, list=10%, signal=74%	UPB1/ALDH2/MLYCD/EHHADH/CNDP1/ACADM/DPYS/DPYD/ALDH1B1/ABAT/ECHS1/ALDH3A2/HIBCH/HADHA/ALDH7A1/AOC2/AOC3/ALDH9A1
CHARAFE_BREAST_CANCER_LUMINAL_VS_BASAL_DN	454	0.48499	2.52294	0.000262055	0.00110632	0.000523932	9314	tags=45%, list=18%, signal=37%	LIPG/EHBP1/PSAT1/CFI/MYO1B/ZBTB16/PXDC1/CXCL2/EVA1A/C3/EGFR/C1R/APOL6/MT1X/MT1H/IL1RAP/C1S/NT5E/CFL2/DPYD/HSD17B11/DST/CD14/CFB/PLS3/RRAS2/ZC3H12C/GALNT2/RETSAT/TNFRSF10D/MT1F/ST3GAL6/TMED5/AKR1C3/NNMT/MET/ITPRID2/ITGA1/DIPK1A/PARP4/MT2A/SPX/ALDH3A2/AKR1C1/MT1G/CCDC82/MME/BMP1/TMEM245/SPRY2/GFOD1/CMPK1/MYO1E/BIN1/RBFOX2/PHLDB2/INPP1/SPATS2L/SPTBN1/RIOK3/EPHA2/DEPP1/NR3C1/SP100/AKAP2/CYLD/FAM171A1…
REACTOME_COMMON_PATHWAY_OF_FIBRIN_CLOT_FORMATION	22	0.808569	2.52274	0.000224467	0.00110632	0.000523932	1618	tags=55%, list=3%, signal=53%	SERPIND1/PROC/PROS1/FGG/F10/F5/FGA/FGB/F13B/SERPINC1/SERPINA5/F2
KEGG_ADIPOCYTOKINE_SIGNALING_PATHWAY	67	0.630939	2.51312	0.000227894	0.00110632	0.000523932	8192	tags=52%, list=16%, signal=44%	ACSL1/ACSL5/PRKAB2/RXRA/ACACB/PCK2/PPARA/LEPR/CPT1A/PRKAG2/AKT2/PCK1/IRS1/CAMKK2/PRKAA1/PPARGC1A/G6PC/IKBKG/IRS2/TNFRSF1A/ADIPOR2/RXRB/PRKAG3/STAT3/TNFRSF1B/MTOR/PRKAB1/STK11/PTPN11/RELA/AKT1/MAPK8/RXRG/NFKBIB/JAK2
PID_ANGIOPOIETIN_RECEPTOR_PATHWAY	49	0.670473	2.51279	0.000228102	0.00110632	0.000523932	9448	tags=61%, list=19%, signal=50%	GRB14/FOXO1/FES/AGTR1/ITGA5/FYN/F2/MAPK14/PLG/PIK3R1/STAT5B/TEK/CRK/NOS3/FN1/ETS1/PTPN11/DOK2/RELA/ELF1/STAT5A/AKT1/PXN/PIK3CA/MAPK8/ANGPT2/NCK1/RPS6KB1/MAPK1/ELK1
RUAN_RESPONSE_TO_TROGLITAZONE_UP	24	0.787435	2.51194	0.00022482	0.00110632	0.000523932	5994	tags=62%, list=12%, signal=55%	ACSL1/PLIN4/CEBPA/SCARB1/SORBS1/ACOX1/DHRS3/HSD17B4/AQP7/PCK1/HIPK2/QKI/CIDEC/DGAT1/NFS1
WAKABAYASHI_ADIPOGENESIS_PPARG_RXRA_BOUND_36HR	143	0.551754	2.51012	0.000237192	0.00110632	0.000523932	10244	tags=53%, list=20%, signal=42%	PLIN1/CAPN3/ACAA1/ETFDH/ACADS/LPCAT3/ACAA2/ACADM/ST3GAL2/ACOX1/ACADVL/CPT2/EPHX2/NID1/TMED5/IDH1/DLC1/CPT1A/ETFB/PAN2/UGT1A6/ILVBL/GANC/CMPK1/KLF11/HSDL2/PLA2G15/DECR1/ECH1/LMBRD1/ETFA/FAH/CHP1/MGST1/ECI2/ITSN1/SCARB2/HSP90B1/GNAI2/IL15RA/MYD88/PTGR2/CCDC18/PITPNM1/BCL2L13/SLCO1A2/NATD1/BMP2K/PEX11G/ATP6V1A/TXNIP/RAMP1/SF1/UGT1A8/GRPEL1/RRP1B/PNRC1/CRTC2/ANKRD46/ZNF655/ORC5/OTUD5/CBLB/OXSR1/HOXA3…
LINDGREN_BLADDER_CANCER_CLUSTER_2A_DN	140	0.552912	2.50732	0.000235571	0.00110632	0.000523932	9583	tags=47%, list=19%, signal=38%	CD302/BACE1/ALDH2/MT1X/MT1H/CFL2/MT1E/GABARAPL1/FUBP3/MT2A/RAB14/ST6GAL1/SELENOP/IQGAP2/ERP44/TMOD1/CCDC50/MAFB/LIG4/RNASE4/TGOLN2/SCML1/DNAJB9/RCAN1/NEK6/SLC31A2/MT1L/SETX/HABP4/ALG2/PBX3/ZFAND5/GNAQ/ALCAM/PER3/MT1B/AOC3/CDK5RAP2/C9orf78/AFAP1L1/DUSP22/DDX3Y/BMP2K/MBNL1/ZMAT1/UBE2E2/NFIL3/CELF2/TMX4/TOX2/DPYSL2/CTNNAL1/CLIC4/RAD23B/UGCG/ISCA1/UBQLN1/SGK1/RCAN2/ARL4C/PQLC3/PRKCQ/JADE1/AK1/FBXW2/L…
DACOSTA_UV_RESPONSE_VIA_ERCC3_COMMON_DN	467	0.480583	2.50723	0.000262467	0.00110632	0.000523932	11518	tags=51%, list=23%, signal=40%	EHBP1/MYO1B/MDN1/MAP2K1/EGFR/DAPK1/IL1RAP/FNDC3A/PHLPP1/FOXN3/DPYD/DST/TJP2/PALM2-AKAP2/ADGRG6/RRAS2/PRKCA/TLE1/SAMD4A/RAPGEF2/ATP13A3/SLC25A13/DLC1/GBE1/TRAM2/WASF3/IBTK/HELZ/MGLL/FYN/MAN2A1/SIK3/FERMT2/IRS1/RBFOX2/EVI5/MED13/PDE8A/TRAPPC8/SEC24B/AUH/DNMBP/ZHX3/NR3C1/PEX3/QKI/FAM171A1/WDR7/ANKS1A/SATB2/TLE4/RFTN1/R3HDM2/PARD3/PHF3/DUSP1/VPS13A/ITSN1/PTPRK/UBR2/ID1/TCF7L2/SPOP/NRG1/MEIS2/CRADD/IT…
REACTOME_INTRINSIC_PATHWAY_OF_FIBRIN_CLOT_FORMATION	22	0.802654	2.50428	0.000224467	0.00110632	0.000523932	2535	tags=59%, list=5%, signal=56%	SERPIND1/KLKB1/PROC/SERPING1/F12/F11/F10/F9/SERPINC1/SERPINA5/KNG1/F2/A2M
BOSCO_INTERFERON_INDUCED_ANTIVIRAL_MODULE	77	0.611423	2.50291	0.000229568	0.00110632	0.000523932	8572	tags=60%, list=17%, signal=50%	GCH1/GBP7/APOL1/APOL6/TMEM176A/STAT2/XAF1/HERC5/DHX58/SLC39A8/IFIT1/ST3GAL5/IRF7/CMTR1/IFIH1/CD40/IFIT3/IFIT5/MX1/GOLGA4/IFI44/PARP12/LILRB1/PML/EIF2AK2/OASL/OAS2/SLC25A28/IFITM3/TDRD7/DDX60/GBP4/IFI44L/EPSTI1/TMEM106A/MOV10/TRIM22/NCOA7/NUB1/TNFSF10/IFI35/RSAD2/MIA3/OAS3/ITGA4/SDC3
REACTOME_SYNTHESIS_OF_BILE_ACIDS_AND_BILE_SALTS_VIA_24_HYDROXYCHOLESTEROL	14	0.908014	2.50101	0.000224316	0.00110632	0.000523932	1681	tags=79%, list=3%, signal=76%	CYP8B1/SLC27A2/CYP27A1/SLC27A5/AKR1C4/CYP39A1/AMACR/AKR1C3/AKR1D1/AKR1C1/HSD3B7
ICHIBA_GRAFT_VERSUS_HOST_DISEASE_D7_DN	44	0.682385	2.4958	0.000228624	0.00110632	0.000523932	4377	tags=55%, list=9%, signal=50%	GHR/DIO1/ACAA1/RDH16/CYP4A22/CYP4A11/C8G/PKLR/LIPC/CYP2C8/HMGCS2/SC5D/SERPINA6/CRYL1/HSD17B2/ELOVL6/G6PC/ELOVL2/UCK1/SLC26A1/RELN/CDC5L/LIFR/TENM3
RUAN_RESPONSE_TO_TNF_TROGLITAZONE_DN	39	0.697933	2.48648	0.00022941	0.00110632	0.000523932	4788	tags=49%, list=10%, signal=44%	PFKFB1/GPAM/TST/ALAD/PC/ORM1/FXYD1/DHRS3/MMUT/HSD17B4/IDH1/AQP7/APOC4/HIPK2/PXMP2/TPP2/PPARG/AOC3/RNF11
BIOCARTA_LECTIN_PATHWAY	12	0.940521	2.47996	0.000224972	0.00110632	0.000523932	1462	tags=92%, list=3%, signal=89%	C2/C5/MASP2/MBL2/C3/C4B/MASP1/C8A/C9/C4A/C6
OSMAN_BLADDER_CANCER_UP	395	0.48224	2.47569	0.000258264	0.00110632	0.000523932	9889	tags=42%, list=20%, signal=34%	ALDH2/CEBPA/GOLIM4/DPYD/GLUD1/DIAPH2/TMED5/SCP2/P4HB/KYNU/SLC25A13/PARP4/GBE1/ACBD5/IFNAR2/RAB14/C19orf12/ZNF319/MAN2A1/HIPK2/MAPK14/CAMKK2/RIOK3/FOXN2/TGOLN2/PIK3R1/SDF4/LACTB2/CALR/CEP57/LIN7C/NMD3/SGMS2/ZFAND3/RNPC3/PDLIM5/A2M-AS1/TTC17/NNT/TCF7L2/SCARB2/TTC33/HSP90B1/SNRNP48/AGPS/MAGT1/GCLM/EIF5/ZER1/WASHC4/FAM107B/SEC24A/CTSB/SLC44A1/ZYG11B/PNISR/MAP3K2/AKAP13/TPP1/CDC5L/FBXW5/ANKRD17/UBXN4/…
RUIZ_TNC_TARGETS_UP	155	0.539039	2.47522	0.000238493	0.00110632	0.000523932	7827	tags=48%, list=16%, signal=41%	COL18A1/TDO2/CLU/METTL7A/APOE/C1RL/PROS1/CAT/KLF9/MAN1A1/RAB17/IL1R1/HPGD/ZCCHC24/SLC23A2/GBE1/ZBTB20/FCGRT/SELENOP/HNMT/IQGAP2/BDH2/MAFB/SIDT2/AUH/HERPUD1/EXTL2/TRO/A2M/SAT1/GPRC5C/ITSN1/RESF1/ST3GAL1/NBR1/SLC5A3/IFIH1/PCMTD2/RSRP1/TPP1/CXCL12/IMPA2/LDB2/GRN/UBXN4/TNKS/CTSA/ID2/VCAM1/PSAP/PLPP1/BTN3A2/FOXF1/SLC2A10/KLHL24/NR2F1/SNCAIP/ENPP2/BAZ2B/HBP1/SLC35E2A/BCL6/WASHC2C/BTG1/LTA4H/MEIS1/BTN3A…
DEURIG_T_CELL_PROLYMPHOCYTIC_LEUKEMIA_DN	321	0.492834	2.47326	0.000254453	0.00110632	0.000523932	12465	tags=53%, list=25%, signal=40%	GCH1/MAF/SYNE3/MT1X/MT1H/MAN1A1/ARNTL/RDX/NR3C2/HPGD/AKR1C3/ACAT1/MT2A/IL18R1/FYN/RORA/NR2C1/IQSEC1/MAN2A1/SERINC1/MALT1/SYNE1/SCML1/CYLD/PGRMC2/TRMT11/PIK3R1/CTSL/CEP57/TPST2/OPTN/MBP/NFX1/HABP4/ABCB1/PPP3CC/TCAF1/GSAP/FAS/ZCCHC2/WHAMMP3/CFLAR/PNISR/STAT4/TGFBR2/EML4/SNRK/STAT3/TBC1D4/TNFRSF1B/ENOSF1/PRF1/ID2/MAP3K5/KLRF1/USP48/ALCAM/OGA/KLHL2/ADRB2/LINC00667/PJA2/FCHSD2/RTN4/RAB27A/APMAP/USP47/…
HUANG_DASATINIB_RESISTANCE_UP	80	0.599176	2.47114	0.000229568	0.00110632	0.000523932	9024	tags=49%, list=18%, signal=40%	EGFR/PGM1/DPYD/PALM2-AKAP2/TFPI/AKR1C3/NNMT/MET/ITGA5/DUSP10/CCDC50/ANTXR2/INPP1/EPHA2/CALD1/ELL2/PDGFC/AGPS/IFIT3/ST5/TGFBR2/IL15RA/EXT1/UBE2E3/RIPK4/RAI14/BTN3A2/CAST/LYN/PRNP/CAV2/SH3KBP1/BTN3A3/FSTL1/PPP1R18/SNAI2/IFI16/MSN/CDC42EP3
CHIANG_LIVER_CANCER_SUBCLASS_CTNNB1_DN	171	0.531299	2.46936	0.000242895	0.00110632	0.000523932	6752	tags=39%, list=13%, signal=34%	SLC17A9/CNGA1/SLC25A18/ATP2B2/GCH1/HAL/GLDC/PGLYRP2/SLC7A2/GDA/VNN1/GLS2/HABP2/FURIN/KCNT2/TBX15/FOXA3/GPR88/INHBE/PRG4/GOT1/HPGD/FBP1/GLT1D1/MYOM1/LSR/GATA6/CDA/MGLL/C9/HSD17B2/MYO1E/SLC15A1/LGALS4/DCPS/ETS2/RFTN1/SLC2A9/CP/RALGAPA2/ARRDC4/TPST1/STAT4/CXCL12/SLPI/MCC/COLEC11/GLIS3/CYFIP2/MAP3K5/SEMA6A/NAV2/BMP2/SDSL/RAB27A/PAG1/ERICH5/BGN/GPNMB/SEPT6/CYP2B7P/C7/CRP/ACP5/PKDCC/EPHA1/TNFSF13B
LEE_DIFFERENTIATING_T_LYMPHOCYTE	197	0.519226	2.46432	0.0002457	0.00110632	0.000523932	13001	tags=52%, list=26%, signal=39%	ALDH5A1/SLC46A3/ATF7IP2/AQP3/CCDC152/SORL1/IFNAR2/KLF13/FKBP5/SATB1/TRIM14/RASSF5/CYTH1/AKNA/TMEM131L/ZC3H7B/FNBP1/STAG3/APBB1IP/FAM107B/EPB41/SPATA13/PNISR/AKAP13/ITGAL/C9orf64/RBM33/USF3/CYFIP2/PSMA3-AS1/MPHOSPH9/METAP2/PAG1/UBE2G2/BRD2/SEPT6/FYB1/SP110/CELF2/MYCBP2/TXNIP/CDK13/GABPB1-AS1/STX16/BTG1/CAMK1D/HCLS1/RCSD1/TRIM56/CNOT6L/ARHGAP30/SEC31B/ITGB2/OCIAD1/PTPRC/KDM5A/TBC1D10C/GALK2/DICER1/…
REACTOME_ANTIGEN_ACTIVATES_B_CELL_RECEPTOR_BCR_LEADING_TO_GENERATION_OF_SECOND_MESSENGERS	85	0.589327	2.45984	0.000230627	0.00110632	0.000523932	12081	tags=58%, list=24%, signal=44%	FYN/PIK3AP1/IGHM/PLCG2/PIK3R1/STIM1/BLNK/IGHV4-39/ITPR2/IGLV1-47/BLK/SOS1/PIK3CD/LYN/CALM1/IGLV3-1/IGKV3-20/IGHV2-70/IGKV2-28/IGLC2/IGHV3-7/SH3KBP1/SYK/IGHV3-23/PTPN6/IGHV4-59/IGKV1-39/IGLV2-23/IGHV3-48/NCK1/IGKV2-30/IGKV1-5/IGKV2D-30/IGLV1-40/IGLV1-51/IGKV1-12/IGLV2-11/IGKV4-1/IGHV3-33/IGLV2-14/IGKV1-16/IGLC3/IGLV3-19/IGHV2-5/IGKV1D-39/BTK/IGKV1-17/IGHV4-34/ITPR1
REACTOME_PLASMA_LIPOPROTEIN_CLEARANCE	33	0.714579	2.45823	0.00022482	0.00110632	0.000523932	4059	tags=45%, list=8%, signal=42%	APOE/AMN/PCSK9/SCARB1/LIPC/NR1H3/APOC1/LSR/APOA1/APOB/APOC4/CES3/LDLRAP1/SOAT2/AP2A2
HOSHIDA_LIVER_CANCER_LATE_RECURRENCE_DN	70	0.610666	2.45103	0.000227739	0.00110632	0.000523932	6417	tags=50%, list=13%, signal=44%	LCAT/HAAO/SLC35D1/ADRA1A/GCKR/COBLL1/ALAD/APBA1/CUX2/TJP2/MAOA/PCYT2/PPP1R1A/ST3GAL6/PEMT/FDX1/ITPRID2/SC5D/CDA/ENPP1/MME/SULT1A1/ZBTB5/PHGDH/ACP2/GCHFR/TEK/ZER1/THRB/PMM1/USF2/ADRA2B/SMAD1/GAB1/CTNND1
FARMER_BREAST_CANCER_CLUSTER_1	48	0.656213	2.44675	0.000227221	0.00110632	0.000523932	8286	tags=50%, list=16%, signal=42%	IGHM/HERC6/XAF1/HERC5/IFIT1/IFIT3/MX1/IGKV1D-13/IFI44/CD38/IL10RA/IGHG1/OASL/OAS2/LCP2/GPR18/IGKV3-20/JCHAIN/IFI44L/IGLC2/GIMAP4/RSAD2/IGHA1/OAS3
SANDERSON_PPARA_TARGETS	15	0.871394	2.44621	0.000224316	0.00110632	0.000523932	4054	tags=73%, list=8%, signal=67%	ETFDH/EHHADH/ACADM/G0S2/HMGCS2/HSD17B4/CPT2/ALDH3A2/FGF21/DECR1/DECR2
REACTOME_METABOLISM_OF_FAT_SOLUBLE_VITAMINS	48	0.655217	2.44304	0.000227221	0.00110632	0.000523932	1862	tags=42%, list=4%, signal=40%	SDC2/TTPA/APOE/BCO2/LRP1/AKR1C4/RETSAT/APOM/AKR1C3/APOC2/APOA2/AKR1C1/SDC1/RBP4/APOA1/APOB/APOC3/TTR/GPC6/APOA4
REACTOME_SYNTHESIS_OF_BILE_ACIDS_AND_BILE_SALTS_VIA_27_HYDROXYCHOLESTEROL	15	0.868597	2.43836	0.000224316	0.00110632	0.000523932	1906	tags=73%, list=4%, signal=71%	RXRA/CYP8B1/CYP27A1/NR1H4/AKR1C4/CYP7B1/AKR1C3/AKR1D1/AKR1C1/HSD3B7/CYP7A1
EINAV_INTERFERON_SIGNATURE_IN_CANCER	27	0.744527	2.43828	0.00022604	0.00110632	0.000523932	9091	tags=67%, list=18%, signal=55%	RXRA/SP100/IFIT1/CMTR1/IFIT3/MX1/IFI44/MORC3/EIF2AK2/IRF9/OAS2/LY6E/SP110/BRD3/IFI44L/IFI35/STAT1/ERG
REACTOME_IMPORT_OF_PALMITOYL_COA_INTO_THE_MITOCHONDRIAL_MATRIX	14	0.884847	2.4372	0.000224316	0.00110632	0.000523932	1347	tags=57%, list=3%, signal=56%	PRKAB2/RXRA/ACACB/THRSP/CPT2/SLC25A20/CPT1A/PRKAG2
BOYAULT_LIVER_CANCER_SUBCLASS_G12_DN	15	0.867171	2.43436	0.000224316	0.00110632	0.000523932	4158	tags=80%, list=8%, signal=73%	ACSL5/GCKR/HLF/ALDH1L1/HGD/PIK3C2G/ADI1/ABCG2/QDPR/FAM13A/FAH/RUNDC3B
DELYS_THYROID_CANCER_DN	233	0.502417	2.4337	0.000248324	0.00110632	0.000523932	4777	tags=33%, list=9%, signal=30%	SDC2/GHR/LIPG/IGF2/DIO1/ALDH2/GLDC/GPER1/HLF/ALDH4A1/ASGR1/GRB14/SLC16A2/HGD/SORD/PHYH/MT1X/MT1H/EPB41L4B/SORBS2/MT1E/ALDH1B1/TLE1/FXYD1/ALDH6A1/ELMO1/CTH/TFPI/MT1F/ALDH1A1/AOX1/MTMR4/ALDH1A2/WASF3/AKR1C1/HHEX/ENPP1/MT1G/DNASE1L3/IQGAP2/GFRA2/SLC25A15/AKAP12/IRS1/ADH1A/SYNE1/ADH1B/SPTBN1/FAXDC2/CPQ/SLC1A1/ACSF2/TLE4/RELN/CCL14/PRPSAP1/ALDH7A1/TNXB/MT1L/MEIS2/TEK/GCAT/PLA2G7/GNAI1/CLDN5/NPR1/CXCL1…
TARTE_PLASMA_CELL_VS_B_LYMPHOCYTE_DN	38	0.685342	2.42743	0.000229568	0.00110632	0.000523932	8595	tags=45%, list=17%, signal=37%	GCH1/HHEX/BIN1/SATB1/MAPRE2/IL4R/IRF8/TGFBR2/BLK/GIT2/MARF1/GPR18/TRIM22/AHR/CXCR5/IFNGR1/CD37
PID_BCR_5PATHWAY	63	0.616979	2.42509	0.000227376	0.00110632	0.000523932	9448	tags=49%, list=19%, signal=40%	MAP2K1/VAV2/IBTK/MAPK14/PLCG2/MALT1/PIK3R1/PTEN/IKBKG/BLNK/PPP3CC/RAF1/CSK/PAG1/FCGR2B/SOS1/MAP3K7/LYN/ETS1/RELA/AKT1/PIK3CA/SYK/MAPK8/PTPRC/PTPN6/NFKBIB/CD72/MAPK1/PDPK1/ELK1
MARTINEZ_RESPONSE_TO_TRABECTEDIN	50	0.645559	2.42464	0.000228833	0.00110632	0.000523932	7399	tags=46%, list=15%, signal=39%	KANK1/SORL1/PCCA/GBE1/IRS1/ADK/PTPRK/ID1/CRADD/MGMT/PTPRG/PPARG/NUMB/GNAQ/EXT1/ALCAM/CUX1/ATF6/HERC1/MARF1/LPP/SND1/TIAM1
NAKAMURA_ADIPOGENESIS_EARLY_UP	62	0.616653	2.42073	0.000225581	0.00110632	0.000523932	6073	tags=44%, list=12%, signal=38%	SIK2/MT1H/FOXO1/MT1E/ABCA1/MT1M/PLIN2/NID1/MT1F/IL1R1/WASF3/MT1G/FYN/INSIG1/PIK3R1/IRS2/MT1L/IL22RA1/ABL1/LIFR/MT1B/GADD45B/NFIL3/SOD2/ACVR2A/CEBPD/GAS1
MULLIGHAN_MLL_SIGNATURE_2_UP	419	0.468028	2.41927	0.000259202	0.00110632	0.000523932	11544	tags=50%, list=23%, signal=39%	IL6R/CD302/UPB1/ECHDC2/RXRA/C1RL/CAT/ABHD2/CES1/CEBPA/ALAD/ABCA8/FES/HDAC6/ARNTL/ARHGEF40/STS/FBP1/P4HB/KYNU/APOC2/EIF4EBP2/CCL23/ALDH3A2/SEPHS2/PTK2B/TK2/AKT2/AKR7A3/PSD4/RRBP1/CAMKK2/PRRG4/MALT1/SLC31A1/SLC27A3/TGOLN2/DCPS/SIRPA/SDF4/MFN2/SMCO4/MSRB1/CTSL/CTBS/TOLLIP/OCEL1/PPIF/PTMS/GLG1/IGF2R/LAMP1/SMPD1/PCNX1/MVB12B/SLC22A18/TNFRSF10B/LRRC20/DDT/GOLGA8N/APBB1IP/IL1RN/SLC25A44/SLC8B1/WHAMMP3/P…
ABBUD_LIF_SIGNALING_1_UP	43	0.65993	2.40583	0.000227428	0.00110632	0.000523932	6071	tags=51%, list=12%, signal=45%	ACAA2/FGG/LBP/TMEM176B/MAN1A1/TMEM176A/LRG1/IL1R1/FBP1/KNG1/ALDOC/RHOU/GRAMD2B/GPX3/ST3GAL1/TNFRSF1A/STAT3/TAPBP/CEBPB/KLF10/TSPAN4/PTPN1
YAO_TEMPORAL_RESPONSE_TO_PROGESTERONE_CLUSTER_0	68	0.603236	2.40447	0.00022899	0.00110632	0.000523932	6743	tags=49%, list=13%, signal=42%	PROS1/CYP4V2/NT5E/HSD17B11/ABCA1/GABARAPL1/IGFBP3/MET/AOX1/SMPDL3A/ST6GAL1/RORA/ALAS1/EPHX1/TEF/ALDOC/NGEF/BACH1/BNIP3/MYCL/PLA2G7/GSTT2B/PNPLA2/LIFR/ADRB2/EPS8/CREBRF/KLHL24/NR1D2/ENPP2/CEBPD/ANGPTL2/ABLIM1
PID_INSULIN_PATHWAY	44	0.657377	2.40433	0.000228624	0.00110632	0.000523932	9940	tags=57%, list=20%, signal=46%	GRB14/SORBS1/INSR/AKT2/F2RL2/IRS1/INS/PIK3R1/RAPGEF1/GRB10/CRK/FOXO3/SOS1/PTPN1/PTPN11/AKT1/PIK3CA/EXOC4/SGK1/NCK1/RPS6KB1/EXOC3/PDPK1/EXOC5/EXOC1
KEGG_INSULIN_SIGNALING_PATHWAY	137	0.531465	2.40298	0.000236072	0.00110632	0.000523932	8115	tags=42%, list=16%, signal=35%	PRKAB2/ACACB/PCK2/MAP2K1/PKLR/FOXO1/SORBS1/SHC2/FBP1/INSR/PDE3B/GYS2/PRKAG2/PHKA2/AKT2/PPP1R3C/PCK1/IRS1/INS/PRKAA1/PPARGC1A/G6PC/PRKACA/PPP1R3B/PIK3R1/PYGL/RAPGEF1/IRS2/HK3/RAF1/FBP2/CRK/PRKAG3/SOCS2/MTOR/ARAF/MKNK1/PRKAB1/SOS1/PIK3CD/CALM1/PHKB/TSC1/PTPN1/INPP5K/PIK3R5/AKT1/PIK3CA/PRKAR1B/SOS2/INPP5D/RPTOR/MAPK8/GCK/FLOT2/CBLB/RPS6KB2
PID_TXA2PATHWAY	56	0.626362	2.40132	0.000228154	0.00110632	0.000523932	9176	tags=57%, list=18%, signal=47%	EGFR/PRKCA/FYN/TGM2/MAPK14/PRKACA/SELE/GNAI2/GNAQ/PLCB2/VCAM1/GNA11/NOS3/FGR/BLK/GRK2/PRKCE/ARRB2/LYN/GNA14/PIK3R5/PTGDR/ARHGEF1/GNB5/AKT1/GNG2/SYK/PTGIR/PIK3R6/ROCK1/PRKCB/PRKCQ
NADLER_OBESITY_DN	47	0.646918	2.39991	0.000228154	0.00110632	0.000523932	5263	tags=45%, list=10%, signal=40%	ALDH2/APOE/AGT/PC/CFB/THRSP/ECHS1/HP/GBE1/RBP4/PCK1/MYLK/CYP2E1/TSHR/MCCC1/UCK1/DDT/GNAI1/BCAT2/SDHB/SOD1
GINESTIER_BREAST_CANCER_ZNF217_AMPLIFIED_DN	330	0.475529	2.39807	0.000252717	0.00110632	0.000523932	12243	tags=51%, list=24%, signal=39%	CYP2D7/UPB1/ATF5/TMEM86B/MDN1/APBA1/FURIN/NEU4/SPON2/PDXP/SLC23A2/CDK3/PPP6R2/NOTUM/RTKN/SPHK2/RAD54L2/CALR/EPN1/TAF1C/KCNK5/ZBTB5/SH3BP2/TMEM259/RHBG/ARMC6/REXO1/AMPD2/ZC3H7B/TTC17/ZNF444/CCAR2/HIRA/ACAD10/CMTR1/ZNF358/SEMA6C/DEPDC5/DCAF8/DHX33/NOL8/RBM33/SNAPC4/ZNF638/DRG2/SEC61A2/TICAM1/MTOR/PPP1R12C/CDC42EP1/GIGYF1/MOGS/SAP25/TLN1/NUP214/TEPSIN/CAPN15/ZNF436-AS1/POLM/GBA2/STK11/LTB4R/MINK1/CL…
SANA_RESPONSE_TO_IFNG_UP	72	0.593611	2.39626	0.000229043	0.00110632	0.000523932	7671	tags=47%, list=15%, signal=40%	LIPG/SERPING1/CFH/APOL1/C1S/HSD17B11/PLA1A/APOL2/SEPT4/CX3CL1/LAP3/HLA-E/CEACAM1/IFIH1/MX1/PARP14/MLKL/DTX3L/APOL3/GIMAP7/OAS2/SLC25A28/DDX60/IL18BP/PARP9/IFI44L/SAMHD1/BATF2/TRIM22/GBP1/HLA-A/TNFSF10/NLRC5/IFI35
PID_EPO_PATHWAY	33	0.695571	2.39284	0.00022482	0.00110632	0.000523932	8694	tags=58%, list=17%, signal=48%	VAV2/TEC/MAPK14/PLCG2/PIK3R1/STAT5B/SH2B3/RAPGEF1/IRS2/SOS1/LYN/EPOR/PTPN11/GAB1/STAT5A/MAPK8/PTPN6/JAK2/STAT1
REACTOME_REGULATION_OF_INSULIN_LIKE_GROWTH_FACTOR_IGF_TRANSPORT_AND_UPTAKE_BY_INSULIN_LIKE_GROWTH_FACTOR_BINDING_PROTEINS_IGFBPS	124	0.537475	2.38881	0.000235294	0.00110632	0.000523932	5080	tags=40%, list=10%, signal=36%	SDC2/IGF2/SERPIND1/IGFALS/FAM20A/APOE/SERPINA10/CDH2/PROC/PCSK9/APOA5/EVA1A/C3/FGG/APOL1/F5/FGA/FAM20C/IGF1/NUCB1/IGFBP4/IGFBP3/P4HB/SPP2/APOA2/SERPINC1/C4A/APOA1/APOB/AHSG/NOTUM/TF/KNG1/F2/PLG/APLP2/TGOLN2/ITIH2/ALB/SERPINA1/IGFBP1/CP/MEPE/HSP90B1/PNPLA2/DNAJC3/AFP/PAPPA2/FN1/MBTPS1
REACTOME_RESPONSE_TO_ELEVATED_PLATELET_CYTOSOLIC_CA2PLUS	131	0.531836	2.38666	0.000235128	0.00110632	0.000523932	6355	tags=40%, list=13%, signal=35%	IGF2/CLU/SERPING1/A1BG/PROS1/FGG/F5/ITIH3/RARRES2/FGA/FGB/PRKCA/ORM1/SERPINA4/IGF1/APOOL/SERPINF2/SPP2/ORM2/ITIH4/SELENOP/APOA1/AHSG/ECM1/TF/KNG1/HRG/APOH/PLG/APLP2/ALB/SERPINA1/CDC37L1/TMX3/A2M/SYTL4/HABP4/HSPA5/HGF/SERPINA3/PSAP/FN1/SOD1/TLN1/CHID1/CLEC3B/CALM1/NHLRC2/F8/GAS6/TOR4A/SCCPDH
REACTOME_ETHANOL_OXIDATION	12	0.904354	2.38459	0.000224972	0.00110632	0.000523932	2183	tags=83%, list=4%, signal=80%	ALDH2/ADH6/ALDH1B1/ALDH1A1/ADH5/ADH1A/ADH1B/ACSS2/ADH1C/ADH4
VANLOO_SP3_TARGETS_DN	87	0.569184	2.38456	0.000230521	0.00110632	0.000523932	7677	tags=47%, list=15%, signal=40%	CD302/UPB1/KHK/EHHADH/SLC39A5/FUOM/F7/CFAP57/HSD17B11/MAOA/QPRT/ACBD4/CDO1/MARCO/PTGR1/MTHFS/ALDOB/CD5L/GPR155/CFP/FAH/TOM1L1/GCAT/TPMT/TXNRD3/LGMN/DHRS4/CAMK1/TOP1MT/MYD88/PITPNM1/MARC1/AKAP7/CLEC10A/C1QB/RABEPK/IL18RAP/ZDHHC2/FABP2/LGALS2/CD82
BOQUEST_STEM_CELL_DN	218	0.495783	2.38238	0.000246975	0.00110632	0.000523932	9174	tags=45%, list=18%, signal=37%	CFI/PALMD/SCARB1/G0S2/ABLIM3/MYRIP/GIPC2/CCDC68/MET/NR5A2/ALDH1A2/HHEX/IL18R1/SCARF1/ST6GAL1/TGM2/PLA1A/GFOD1/PTPRB/KDR/RAPGEF4/XAF1/AKAP2/TSPAN6/C1orf115/ETS2/RCAN1/SH2B3/CCL14/ENG/CYTH1/CX3CL1/S1PR1/THSD7A/TEK/ARHGEF15/CARD10/CDH5/SELE/IFIH1/CLDN5/CFLAR/RAMP3/SOCS2/TNFRSF1B/CLEC1A/RASIP1/SYBU/ADGRL4/SEMA6A/KLHL2/ADRB2/PITPNC1/MGST2/GIMAP6/TSPAN7/PDE2A/NOTCH4/PNP/KANK3/MYCT1/APLNR/RND1/SMAD1/EFN…
WANG_RESPONSE_TO_GSK3_INHIBITOR_SB216763_UP	387	0.464571	2.38085	0.000257533	0.00110632	0.000523932	10234	tags=43%, list=20%, signal=34%	ALDH2/ACAD11/SLC46A3/FRRS1/ATF7IP2/C5/C1RL/PROS1/ST3GAL2/SNX29P2/ABAT/ELMO1/IGF1/SLC25A20/SORL1/VWA8/MYOM1/MYO18A/FLVCR2/PAN2/ITCH/AMY2B/SAT2/FGGY/TCAIM/GFRA2/TBC1D3C/STAT2/PLD1/SCAPER/NBR2/CD4/GPHN/HPD/SIDT2/USO1/LIG4/FGD2/XAF1/FOXN2/ARRDC3/CSNK2A2/RHOU/ACSF2/MYO15B/LRMDA/GRAMD2B/KLHDC1/R3HDM2/SLC2A9/SAT1/ZFAND3/MGST1/TTC17/LAMP1/SCARB2/PAFAH2/PUS10/TMEM198B/PCNX1/SERINC5/RRAGD/SCARNA17/IFIH1/CT…
SHEN_SMARCA2_TARGETS_UP	427	0.458035	2.37328	0.000258331	0.00110632	0.000523932	12722	tags=50%, list=25%, signal=38%	FMR1/KANK1/RDX/APOOL/ZC3H13/GBE1/HIBCH/RAB14/CLINT1/HNMT/SERINC1/RMND5A/SUCLG2/SMAD4/SCAPER/SEC24B/HSDL2/ITFG1/SEC63/RIOK3/TGOLN2/PEX3/TRMT11/CREG1/CEP57/MTO1/STAU1/KLHDC2/CALCOCO2/INSIG2/CENPC/PHF3/LMBRD1/RNF146/NNT/SETX/UBR2/TTC33/ITSN2/NBR1/SEC62/RAF1/PCMTD2/SDHD/NAB1/SMARCA2/NCOR1/DERA/NUMB/C6orf120/ANKRD17/NSMCE4A/KIAA1109/GNAQ/UPF2/TLK1/NDFIP1/PEX19/SMC5/PKN2/PJA2/HMG20A/RNF130/XPA/ATMIN/PO…
WANG_CLASSIC_ADIPOGENIC_TARGETS_OF_PPARG	28	0.716605	2.37089	0.000225175	0.00110632	0.000523932	4892	tags=61%, list=10%, signal=55%	ACSL1/PLIN4/CEBPA/NR1H3/HSD11B1/ORM1/ADHFE1/EPHX2/ALDH1A1/AQP7/MGST1/CRAT/PPARGC1B/CIDEC/PNPLA2/PEX11A/DGAT1
REACTOME_TRANSCRIPTIONAL_ACTIVATION_OF_MITOCHONDRIAL_BIOGENESIS	55	0.620204	2.37073	0.000228624	0.00110632	0.000523932	8500	tags=49%, list=17%, signal=41%	RXRA/PPARA/GLUD1/POLRMT/ESRRA/ALAS1/HELZ2/ACSS2/PPARGC1A/GLUD2/PPARGC1B/NCOR1/GABPA/SIRT5/CHD9/SIRT4/SOD2/CREBBP/CALM1/TFB1M/NCOA2/POLG2/CRTC2/MEF2C/TBL1X/SIRT3/CARM1
DAUER_STAT3_TARGETS_UP	48	0.6357	2.37027	0.000227221	0.00110632	0.000523932	7605	tags=48%, list=15%, signal=41%	AGT/C3/FGG/LBP/FGA/FGB/ABCA1/PALM2-AKAP2/PLPP3/SAMD4A/STAT2/AKAP12/KLF11/IGFBP1/CTSB/STAT3/SOD2/EFNA1/CEBPD/HEG1/BCL6/UGCG/ZFP36
KAAB_HEART_ATRIUM_VS_VENTRICLE_DN	262	0.482774	2.3702	0.000250063	0.00110632	0.000523932	7238	tags=37%, list=14%, signal=32%	GPT/ACAA1/ALDH5A1/ACADS/CDH2/LMO7/ASS1/PCSK6/ACAA2/ALDH1L1/PDK4/HYAL1/KIFC3/PHYH/PGM1/BDH1/SORBS2/TJP2/KCNJ8/PINK1/GADD45A/ACADVL/MAOB/RAPGEF2/SLC25A20/PCYT2/CKMT2/ECHS1/GOT2/PTPN3/ACAT1/GBE1/SDHA/ADH5/VTN/APOA1/AK4/ALAS1/SPTBN1/AUH/PAIP2B/ALDOC/DECR1/CXADR/ECH1/RCAN1/BNIP3/HADHA/AIFM1/BCKDHA/STIM1/GLUD2/PDLIM5/HADH/ENO3/ELAC2/MEIS2/CRADD/PKP2/TCAF1/GCAT/CHN2/SDHD/IMPA2/CYB5A/BCAT2/MYOM2/TBC1D4/C…
BERTUCCI_INVASIVE_CARCINOMA_DUCTAL_VS_LOBULAR_DN	46	0.641447	2.36866	0.000227894	0.00110632	0.000523932	7737	tags=50%, list=15%, signal=42%	ALDH1L1/PDK4/SYNE3/FOXN3/ABCA6/IGF1/ALDH1A1/CCDC82/SELENOP/RBP4/TF/MRGPRF/TNXB/TEK/CIDEC/TGFBR2/TNFRSF1B/NGFR/PIK3CD/TXNIP/RCSD1/OMD/EMCN
REACTOME_GAMMA_CARBOXYLATION_HYPUSINE_FORMATION_AND_ARYLSULFATASE_ACTIVATION	39	0.66449	2.36733	0.00022941	0.00110632	0.000523932	6133	tags=49%, list=12%, signal=43%	PROZ/PROC/PROS1/F10/F7/FURIN/F9/FN3K/STS/ARSE/F2/GGCX/ARSB/ARSF/ARSA/DPH1/EEF2/ARSD/GAS6
MILI_PSEUDOPODIA_CHEMOTAXIS_DN	420	0.456861	2.36257	0.000259134	0.00110632	0.000523932	10523	tags=47%, list=21%, signal=37%	POR/MST1/KHK/STEAP3/SLC39A14/SERPINF1/SLC38A4/ATRN/LRP1/C1R/LIME1/C1S/PDIA5/SLC38A10/CDIP1/CNNM2/ITGA5/AGFG2/POFUT1/SLC23A2/SIGMAR1/DIAPH1/SS18L1/ADAMTSL4/AKAP1/BMP1/RRBP1/ECM1/VASN/NPR2/SERINC1/SUN2/RUSC2/SEL1L/GGCX/APLP2/FAM171A1/NDEL1/MACO1/CHKA/PVR/CLCN4/RCN3/CALD1/LMBRD1/DUSP1/SLC19A1/TRIM35/BAIAP2/PNPLA7/GLG1/TXNDC5/NHLRC3/NAGLU/HSPA5/SNRNP48/PLA2G7/SYVN1/SLC8B1/PLOD1/CTSB/SLC16A1/SGMS1/ABC…
RUTELLA_RESPONSE_TO_HGF_DN	236	0.486044	2.36151	0.000247586	0.00110632	0.000523932	8066	tags=41%, list=16%, signal=34%	CD14/PDIA5/PID1/QPRT/ACADVL/PLIN2/ARHGEF40/SORL1/STS/ST6GAL1/FYN/IQGAP2/SIK3/HOMER2/SIGIRR/MAFB/RNASE4/APLP2/MAPRE2/DECR1/HERPUD1/CD163/MYO15B/ETS2/HADHA/PLEKHA5/TLE4/CHPT1/CYTH1/TMEM131L/IL13RA1/NAMPT/CFP/DEPTOR/ZNF395/AMPD2/FNBP1/TCF7L2/ZDHHC18/PLCL2/NRG1/HLA-E/MAP3K14/PLAC8/MAP4K4/MAN2A2/CCDC69/CNPY3/IMPA2/ITGAL/AOAH/DPEP2/ZFAND5/WNT5B/ARGLU1/MYD88/MPRIP/FCHSD2/PTGER2/PNP/KLF10/EIF2AK2/NUP214/…
REACTOME_GAMMA_CARBOXYLATION_TRANSPORT_AND_AMINO_TERMINAL_CLEAVAGE_OF_PROTEINS	11	0.919666	2.35915	0.000225225	0.00110632	0.000523932	1946	tags=82%, list=4%, signal=79%	PROZ/PROC/PROS1/F10/F7/FURIN/F9/F2/GGCX
GARY_CD5_TARGETS_UP	472	0.451601	2.35794	0.000262605	0.00110632	0.000523932	11447	tags=48%, list=23%, signal=38%	CBS/PSAT1/TUBE1/SLC43A1/PCK2/SELENOO/PPARA/SCARB1/LEPR/ABHD6/FOXN3/ASL/LRRC28/INHBE/ALDH6A1/SOX5/CTH/AMFR/MPST/TKFC/SORL1/STS/NFE2L1/DHTKD1/GBE1/SC5D/PAN2/MICU1/FAHD2A/MEGF9/FYN/ACY1/MGAT4B/IGHM/CD99L2/MSMO1/INSIG1/SUCLG2/NADK/RBFOX2/CDK10/SULT1A1/SHMT2/AUH/MAPRE2/ALDOC/LSS/OGFR/STAT5B/CALR/CAMK2D/SESN2/CTBS/KLHDC2/HIBADH/PHGDH/SGPP1/KIAA1147/GCHFR/R3HDM2/RAB11B/SAT1/SPIC/ZFAND3/MBP/MRPL2/SPOP/HL…
BIOCARTA_CLASSIC_PATHWAY	14	0.854439	2.35344	0.000224316	0.00110632	0.000523932	6205	tags=93%, list=12%, signal=81%	C2/C5/C3/C1R/C1S/C4B/C8A/C9/C4A/C6/C1QC/C7/C1QB
REACTOME_REGULATION_OF_CHOLESTEROL_BIOSYNTHESIS_BY_SREBP_SREBF	55	0.615428	2.35247	0.000228624	0.00110632	0.000523932	9960	tags=56%, list=20%, signal=45%	RXRA/ACACB/GPAM/PPARA/SC5D/SCAP/INSIG1/SEC24B/MVK/HELZ2/ELOVL6/LSS/INSIG2/SEC24A/CYP51A1/CHD9/TM7SF2/SAR1B/MBTPS1/SCD/CREBBP/NCOA2/SEC24D/MBTPS2/HMGCS1/TBL1X/CARM1/NFYC/MVD/SEC24C/SEC23A
PHONG_TNF_RESPONSE_NOT_VIA_P38	339	0.464867	2.35234	0.000251636	0.00110632	0.000523932	9203	tags=42%, list=18%, signal=34%	ADGRA3/GCH1/ABTB2/FZD5/ATF5/MAP2K1/CLDN1/EGFR/G0S2/ABLIM3/ABCA1/GADD45A/PROX1/ZFHX4/PLPP3/SAMD4A/RAPGEF2/ARHGEF40/SLC30A1/FDX1/NFE2L1/CADM1/GATA6/IFNAR2/CYP1A1/MEGF9/NR2C1/MGAT4B/HSD17B2/SEL1L/DOCK4/DNMBP/EPHA2/TGOLN2/SP100/CYLD/CXADR/OGFR/FXN/ETS2/RCAN1/ABCD3/PLEKHA5/PPIF/CX3CL1/GCHFR/CALD1/C1QTNF1/IRS2/OPTN/GPRC5C/PDLIM5/FNBP1/TCF7L2/PDIA4/MEIS2/VIPR1/TNFRSF10B/HSP90B1/GRK5/HSPA5/GSAP/ECE1/IRF2…
MULLIGHAN_MLL_SIGNATURE_1_UP	381	0.459557	2.35212	0.000256805	0.00110632	0.000523932	11745	tags=51%, list=23%, signal=39%	SNTB1/IL6R/CD302/UPB1/RXRA/C1RL/SULT2A1/CAT/ABHD2/CEBPA/SLC43A3/ABCA8/FES/HDAC6/ARHGEF40/STS/P4HB/INSR/EIF4EBP2/CCL23/ALDH3A2/SEPHS2/PTK2B/TK2/AKR7A3/IQSEC1/PSD4/RRBP1/KNG1/PPID/TXNRD2/JMJD1C/MALT1/SLC27A3/TGOLN2/DCPS/SIRPA/SDF4/SMCO4/RCAN1/TOLLIP/PPIF/GLG1/IGF2R/LAMP1/SMPD1/PCNX1/MVB12B/SLC22A18/TNFRSF10B/FUCA1/LRRC20/GOLGA8N/IL1RN/SLC8B1/PLOD1/RASSF4/SDHD/CNPY3/TPP1/PBX3/IRF8/GRN/DPEP2/IGFLR1/C…
CHANGOLKAR_H2AFY_TARGETS_DN	41	0.651454	2.35078	0.000228415	0.00110632	0.000523932	7253	tags=51%, list=14%, signal=44%	GHR/ABCG5/C8G/SORBS2/PROX1/MASP1/CRYL1/MYLK/RELN/ELL2/AR/CHERP/SECISBP2/MPHOSPH8/PEX19/SUCNR1/USF2/GSTM1/NEK4/TBCEL/CMKLR1
REACTOME_VISUAL_PHOTOTRANSDUCTION	100	0.547828	2.34517	0.0002331	0.00110632	0.000523932	1862	tags=30%, list=4%, signal=29%	SDC2/CNGA1/RDH16/HSD17B6/APOE/RDH10/BCO2/LRP1/CYP4V2/AKR1C4/PRKCA/DHRS3/RETSAT/RDH5/APOM/MYO7A/AKR1C3/APOC2/GNAT1/APOA2/NAPEPLD/AKR1C1/SDC1/RBP4/APOA1/APOB/APOC3/TTR/GPC6/APOA4
BROWNE_INTERFERON_RESPONSIVE_GENES	66	0.591782	2.3448	0.000228519	0.00110632	0.000523932	9944	tags=58%, list=20%, signal=46%	GCH1/ZBTB20/XAF1/SP100/TRIM14/CYTH1/IFIT2/IRF7/IFIT3/IFIT5/MX1/IL15RA/IFI44/RGL1/MYD88/PML/EIF2AK2/OASL/PLSCR1/OAS2/SP110/TDRD7/STX11/IFI44L/SAMHD1/TREX1/TRIM22/GBP1/TNFSF10/TLR3/THEMIS2/NMI/IFI35/RSAD2/STAT1/HLA-F/LMO2/MX2
PICCALUGA_ANGIOIMMUNOBLASTIC_LYMPHOMA_UP	208	0.490608	2.34477	0.000246853	0.00110632	0.000523932	7850	tags=40%, list=16%, signal=34%	TDO2/CLU/FAM20A/APOE/SERPING1/CFH/ABCC3/SLCO2B1/CYP27A1/C3/C1R/TMEM176B/C1S/RARRES2/CFB/RBP5/NR1H3/TMEM176A/PLPP3/APOC1/NNMT/IDH1/ARHGAP42/C4A/HNMT/EPHX1/MYLK/FERMT2/PLD1/PCOLCE/DOCK4/DEPP1/TNS1/CTSL/CCL14/A2M/ENG/CALD1/CP/PDLIM5/SLC40A1/FUCA1/CDH5/NPL/RASSF4/IL33/CXCL12/LIFR/RSPO3/RGL1/C1QC/VCAM1/ADGRL4/COL6A1/TLR4/ITGA9/FN1/GPNMB/RAI14/FAM114A1/CETP/EMILIN1/SEPT10/TJP1/RGS5/ENPP2/C7/PAPSS2/CAV2…
FOSTER_TOLERANT_MACROPHAGE_DN	403	0.45557	2.34398	0.000258866	0.00110632	0.000523932	7680	tags=33%, list=15%, signal=28%	COL18A1/LIPG/EXOC3L4/ERRFI1/ABTB2/FZD5/SLC39A14/GDA/SYNE3/ADGRL2/TUT7/FMR1/TJP2/ADGRG6/C19orf66/WDR59/PTPRD/SLC30A1/MT2A/RNF125/INPP1/SEC24B/XKR8/MALT1/GK/FKBP5/NR3C1/XRN1/SLC45A3/IQCJ-SCHIP1/FANCC/MINPP1/RCAN1/CEMIP2/TRIM26/LRCH1/OTUD1/TMEM30A/ENG/IL13RA1/NAMPT/CP/NEK6/PDLIM5/ZNRF3/IL4R/PIM1/FAS/AC026470.1/PCGF5/IRF2/CMTM6/PHC2/IFIH1/PPM1K/CD40/IL33/SPATA13/SLC44A1/MX1/TPST1/SDC4/SLC16A1/ZEB1/SE…
REACTOME_SIGNALING_BY_RETINOIC_ACID	43	0.642576	2.34256	0.000227428	0.00110632	0.000523932	5315	tags=49%, list=11%, signal=44%	RDH16/ALDH8A1/RXRA/RDH10/PDK4/DHRS3/RDH5/ALDH1A1/AKR1C3/ALDH1A2/CPT1A/ADH1A/ADH1C/PDK2/ADH4/RXRB/DHRS4/RDH11/DLD/CYP26A1/PDHA1
REACTOME_FATTY_ACIDS	15	0.833677	2.34033	0.000224316	0.00110632	0.000523932	992	tags=67%, list=2%, signal=65%	CYP2D6/CYP4A22/CYP4A11/CYP4F3/CYP2A7/CYP2B6/CYP4F11/CYP4F12/CYP2J2/CYP4F2
SIG_BCR_SIGNALING_PATHWAY	46	0.633673	2.33995	0.000227894	0.00110632	0.000523932	9416	tags=52%, list=19%, signal=42%	NR0B2/CD81/AKT2/PLCG2/PIK3R1/BLNK/PPP3CC/RAF1/ITPR2/NFATC2/CSK/SOS1/PIK3CD/LYN/AKT1/PIK3CA/SYK/SOS2/INPP5D/FLOT2/PTPRC/BCR/MAPK1/PDPK1
IKEDA_MIR30_TARGETS_UP	114	0.533029	2.33986	0.000233209	0.00110632	0.000523932	8598	tags=45%, list=17%, signal=37%	MAF/FNDC3A/CFL2/CPNE8/ELMO1/ARID4A/GNAO1/RAPH1/IRS1/WDR7/PI4K2B/LARGE1/IRS2/DDAH1/ITSN1/MAP4K4/GOLGA4/CDK6/TNRC6A/NFAT5/ACVR1/CHD9/USP47/NRBF2/ELL/RAI14/RAP2C/MYH10/WDR44/LRRC8D/CAST/CPEB4/CPEB2/MAN1A2/CALM1/CELF2/DMD/VKORC1L1/FNDC3B/DPYSL2/EPC2/HIC2/SCAF4/USP15/MARCKS/PIP4K2A/NFIB/PELI1/PAPOLA/DDX46/P4HA1
HIRSCH_CELLULAR_TRANSFORMATION_SIGNATURE_UP	242	0.480336	2.33953	0.000248324	0.00110632	0.000523932	8930	tags=39%, list=18%, signal=32%	GCH1/CFH/PROS1/C1R/CFHR3/IL1RAP/C1S/NT5E/ABCA1/TJP2/ADGRG6/GALNT2/IL1R1/MOCOS/FYN/MME/ALAS1/MAPK14/SIGIRR/EPAS1/DOCK4/EPHA2/HERC5/IL7/ALDOC/SERPINA1/PYGL/CTSL/ETS2/CTBS/FST/BNIP3/CYTH1/S1PR1/DUSP1/SAT1/SLC39A8/IRF2/IRF7/PLOD1/CTSB/SLC33A1/CAAP1/GRN/IFRD1/STAT3/IL15RA/UBXN4/EGLN1/MAP3K5/PIKFYVE/NIT1/MYD88/PHLDA1/DENND1A/LYRM1/SLC12A7/PNP/ARHGEF18/IRF9/TNFAIP1/PLSCR1/MTUS1/SOD2/GALE/GAS1/CD68/RBM7/…
REACTOME_SCAVENGING_OF_HEME_FROM_PLASMA	68	0.586618	2.33824	0.00022899	0.00110632	0.000523932	11848	tags=62%, list=24%, signal=47%	HPX/LRP1/APOL1/HPR/HP/APOA1/AMBP/ALB/CD163/IGHV4-39/IGLV1-47/IGHA2/IGLV3-1/IGKV3-20/IGHV2-70/JCHAIN/IGKV2-28/IGLC2/IGHV3-7/IGHV3-23/IGHV4-59/IGHA1/IGKV1-39/IGLV2-23/IGHV3-48/IGKV2-30/IGKV1-5/IGKV2D-30/IGLV1-40/IGLV1-51/IGKV1-12/IGLV2-11/IGKV4-1/IGHV3-33/IGLV2-14/IGKV1-16/IGLC3/IGLV3-19/IGHV2-5/IGKV1D-39/IGKV1-17/IGHV4-34
WANG_RECURRENT_LIVER_CANCER_DN	16	0.814716	2.33797	0.000222618	0.00110632	0.000523932	4905	tags=75%, list=10%, signal=68%	CNGA1/GCH1/SLC27A2/TIGD2/PTP4A1/CDO1/INSIG1/MAFB/ETS2/ELL2/ID2/SAR1B
REACTOME_BINDING_AND_UPTAKE_OF_LIGANDS_BY_SCAVENGER_RECEPTORS	97	0.548595	2.33636	0.000232775	0.00110632	0.000523932	10772	tags=55%, list=21%, signal=43%	HPX/APOE/LRP1/SCARB1/APOL1/HPR/MASP1/HP/STAB1/SCARF1/MARCO/APOA1/APOB/AMBP/STAB2/ALB/CD163/CALR/SAA1/IGHV4-39/HSP90B1/IGLV1-47/FTL/IGHA2/COLEC11/IGLV3-1/IGKV3-20/IGHV2-70/JCHAIN/IGKV2-28/IGLC2/IGHV3-7/IGHV3-23/IGHV4-59/IGHA1/IGKV1-39/IGLV2-23/IGHV3-48/IGKV2-30/HYOU1/IGKV1-5/IGKV2D-30/CD36/IGLV1-40/IGLV1-51/IGKV1-12/IGLV2-11/IGKV4-1/IGHV3-33/IGLV2-14/IGKV1-16/IGLC3/IGLV3-19
RODWELL_AGING_KIDNEY_DN	145	0.512566	2.33403	0.000237812	0.00110632	0.000523932	8861	tags=48%, list=18%, signal=39%	GHR/ABCA5/ABTB2/AMT/FMO5/PHYH/KLF9/KANK1/GABARAPL1/MMUT/HDAC6/CTH/GOT2/ADH5/PEBP1/KNG1/CPEB3/DBT/BCKDHB/FNDC5/APLP2/FAXDC2/SCML1/MPC1/AASS/PEG3/FOLH1/MTO1/ADCY1/HADHB/ECI2/THSD7A/NNT/PPM1K/TMEM38B/NUDT4/CACNB2/ENOSF1/NDUFS1/C1orf226/SLC16A7/SLC22A23/LINC00667/RTN4/TSPAN7/KLHL24/BTBD11/VSIG10/PLPPR1/LINC02344/FBXO21/ISOC1/NEDD4L/RBM14/LRPPRC/FBXO3/YOD1/CCDC93/ATP5F1A/NLK/SELENBP1/MTR/NAA35/CCNB1IP…
LEE_EARLY_T_LYMPHOCYTE_DN	58	0.602901	2.33104	0.000227428	0.00110632	0.000523932	10164	tags=52%, list=20%, signal=41%	IL6R/AGMAT/FOXO1/MAN1C1/SCML1/CYLD/S1PR1/LDLRAP1/HLA-E/IL4R/NFATC2/TBC1D4/ID2/ANKRD55/LRRN3/GIMAP7/ATM/SAMHD1/HLA-A/GIMAP1/TNFSF10/GIMAP4/GPR183/NLRC5/HLA-B/HLA-F/LINC00869/PIK3IP1/SEMA4C/STK17A
HOSHIDA_LIVER_CANCER_SUBCLASS_S2	115	0.529962	2.32847	0.000233699	0.00110632	0.000523932	9320	tags=43%, list=19%, signal=35%	SNTB1/IGF2/ATP2B2/NT5E/GLUD1/NR5A2/POFUT1/ENPP1/HELZ/PHKA2/NR2C1/SMARCA1/ITIH2/CXADR/CSNK2A2/PEG3/CHKA/ABCD3/TRIM26/PHF3/FGFR4/IGF2R/NCOA4/SLC6A2/GNAI1/PPARG/FGFR3/CDK6/ERBB3/PLXNB1/AFP/LBR/NUP153/ATM/AHCY/BRD3/ADD3/TFIP11/PNN/PRDX3/RRP1B/EP300/MAPK6/ARHGAP35/GCN1/BCLAF1/RBM39/ATF2/DDX18
LEE_LIVER_CANCER_CIPROFIBRATE_UP	60	0.5972	2.3243	0.00022604	0.00110632	0.000523932	4211	tags=42%, list=8%, signal=38%	MLYCD/EHHADH/PDK4/VNN1/ABHD2/GATM/LEPR/NT5E/GIPC2/SPON2/PLIN2/MT2A/VNN3/ALDH3A2/TGM2/APCS/DAB1/TM4SF4/ETS2/IGFBP1/PLA2G7/CIDEC/SLC16A1/PEX11A/PMM1
CASORELLI_ACUTE_PROMYELOCYTIC_LEUKEMIA_UP	168	0.500759	2.32392	0.0002405	0.00110632	0.000523932	9079	tags=42%, list=18%, signal=34%	MST1P2/HAL/SERPING1/N4BP2L1/MARC2/AC129492.1/PRKCA/MT1F/SORL1/LONP2/STAB1/PDE3B/HELZ/SIK3/SPRY2/TGOLN2/ANKS1A/XIST/PLEKHA5/DUSP1/CFP/IRS2/SLC31A2/TCF7L2/ST3GAL5/SPSB3/HGF/IGKV1D-13/ZFAND5/SPEN/ITM2B/PRF1/ID2/SMC5/ALCAM/RNF11/JMJD7-PLA2G4B/TANK/IGHG1/KLF10/SIPA1L1/NFIL3/IGKC/CEBPD/IGKV3-20/FNDC3B/NLRP1/SF1/ADGRE2/HIC2/IGLC2/BTG1/WDFY3/UBE2D4/GPR183/SND1/SIK1/WASL/ZFP36/RBMS1/CBLB/IGHA1/GNLY/VAMP1/…
CHEN_LVAD_SUPPORT_OF_FAILING_HEART_UP	101	0.541775	2.32311	0.00023245	0.00110632	0.000523932	8504	tags=53%, list=17%, signal=45%	CLU/METTL7A/ZBTB16/PDK4/MT1X/MT1H/KLF9/MT1E/AC129492.1/MT1M/RRAS2/AGTR1/PLIN2/NID1/MT1F/INSR/MYOM1/MT2A/ZBTB20/DEPP1/FKBP5/MAPRE2/CD163/PIK3R1/CDC37L1/CALD1/IRS2/DDAH1/ZNF189/ZFAND5/CSDC2/FOXO3/CEBPB/PLPP1/TIPARP/GADD45B/NFIL3/TMEM204/TXNIP/CEBPD/SLC38A2/FNDC3B/RND3/BCL6/FHL1/ELF1/LAMB1/DIXDC1/ZFP36/MCL1/CCNB1IP1/SNAI2/NCKIPSD/REV1
KEGG_CITRATE_CYCLE_TCA_CYCLE	31	0.68503	2.32267	0.000224618	0.00110632	0.000523932	9983	tags=65%, list=20%, signal=52%	PCK2/ACO1/PC/OGDHL/IDH1/SDHA/PCK1/SUCLG2/SDHD/DLD/SDHB/PDHA1/FH/OGDH/SUCLA2/ACO2/DLST/MDH2/SUCLG1/IDH3A
DAZARD_RESPONSE_TO_UV_NHEK_DN	301	0.465263	2.3211	0.000250564	0.00110632	0.000523932	10340	tags=49%, list=21%, signal=39%	DIO1/GCLC/ADGRL2/FNDC3A/PHLPP1/KLF9/FOXO1/ZCCHC14/DST/PALM2-AKAP2/KANK1/GNE/RAPGEF2/ATP13A3/AKR1C3/PTPN3/HELZ/MEGF9/FYN/PPP1R3C/CPEB3/INSIG1/FERMT2/IRS1/DOCK4/SATB1/QKI/MTM1/BACH1/SH2B3/TLE4/INSIG2/CENPC/CYTH1/TMEM131L/PHF3/DOP1A/VPS13A/EXPH5/ID1/SPOP/OTUD4/CLASP1/AC026470.1/ABL1/PHC2/SLC25A44/PIK3R4/PNISR/PSD3/CUL1/ARHGEF7/AFF1/ENOSF1/SPEN/BIRC2/PIK3C3/TLK1/MAP3K5/PIKFYVE/ZNF638/SMC5/SMAD7/ERBB3…
TORCHIA_TARGETS_OF_EWSR1_FLI1_FUSION_DN	314	0.463361	2.32071	0.000253165	0.00110632	0.000523932	9618	tags=44%, list=19%, signal=36%	OAF/ADGRA3/SHMT1/HLF/ADGRL2/N4BP2L1/GJB2/F5/WWC2/SLC6A13/TJP2/CNTLN/GLUD1/SMO/MAOA/PDIA5/RAPGEF2/IGFBP4/CDIP1/PDXP/ITPRID2/PTPN3/SLC25A13/CCL23/PDE3B/SDC1/RSAD1/CD81/CRYL1/FYN/TGM2/PITPNM2/IQGAP2/PTGR1/AGPAT2/HOMER2/KCTD14/BCKDHB/FKBP5/SATB1/NR3C1/TSPAN6/SEPT4/CPQ/SMCO4/CLEC1B/RASSF5/LRMDA/LATS2/PHGDH/LRCH1/KIAA1147/ELL2/CCNYL1/L3MBTL3/GRB10/ARRDC4/SLC39A8/AQP11/PLAC8/MAP4K4/MAN2A2/C11orf95/GSTT2…
REACTOME_METABOLISM_OF_CARBOHYDRATES	293	0.465856	2.31854	0.000250313	0.00110632	0.000523932	8606	tags=39%, list=17%, signal=32%	SDC2/XYLB/GLYCTK/PFKFB1/KHK/SLC37A4/GCKR/GALT/PCK2/HS3ST3B1/SHPK/HYAL1/UGP2/SORD/CHST13/PGM1/PKLR/ST3GAL2/HS3ST3A1/PC/PPP2R1B/TKFC/GOT1/ST3GAL6/ALDH1A1/FBP1/GOT2/SLC25A13/GBE1/SLC25A10/FUT6/NUP88/GYS2/SDC1/GALK1/PHKA2/CRYL1/LYVE1/PPP1R3C/PCK1/GPC6/GYG2/CHST7/ALDOB/DCXR/ALDOC/G6PC/PRKACA/STAB2/MAN2C1/PYGL/SLC26A1/NDST3/MAN2B2/CHP1/HS3ST2/ENO3/B3GAT1/ST3GAL1/ARSB/NAGLU/HK3/HS2ST1/GALNS/NDST1/FBP2/R…
REACTOME_NUCLEAR_RECEPTOR_TRANSCRIPTION_PATHWAY	53	0.609519	2.31407	0.000228102	0.00110632	0.000523932	7752	tags=55%, list=15%, signal=46%	RXRA/NR1I2/PPARA/NR1I3/HNF4A/NR0B2/NR1H4/NR1H3/NR3C2/ESRRA/NR5A2/HNF4G/RORC/RORA/NR2C1/NR3C1/PPARG/RXRB/THRB/AR/NCOR1/NRBF2/NR2F6/NR1D2/NR2F1/ESR1/NR6A1/NR2C2/RXRG
KEGG_GLYCEROLIPID_METABOLISM	49	0.615942	2.30842	0.000228102	0.00110632	0.000523932	5153	tags=43%, list=10%, signal=39%	GLYCTK/LIPG/PNPLA3/ALDH2/GPAM/LIPC/DGAT2/ALDH1B1/AGPAT3/PLPP3/TKFC/ALDH3A2/MGLL/AGPAT2/GK/ALDH7A1/GPAT3/AKR1A1/DGAT1/ALDH9A1/PLPP1
BONOME_OVARIAN_CANCER_SURVIVAL_SUBOPTIMAL_DEBULKING	500	0.439476	2.30761	0.000265745	0.00110958	0.000525477	8380	tags=36%, list=17%, signal=31%	SDC2/IGF2/CD302/ADRA1A/CDHR5/ZBTB16/ECM2/ACO1/GATM/LEPR/RARRES2/ABCA8/FNDC3A/SLC47A1/NT5E/MARC2/DST/GNE/GIPC2/VAV2/MMUT/MAOA/PLPP3/AGTR1/TFPI/MAOB/NID1/IGFBP4/ESRRA/FUBP3/IGFBP3/PTPRD/ZCCHC24/DCAF11/SLC25A10/IFNAR2/IBTK/CAMK2N1/GALK1/STOM/SELENOP/CDK3/DENND4A/MAST3/PSD4/MAN2A1/STAT2/KDR/GCDH/PDSS2/IRS1/NADK/SCAPER/NBR2/PDE8A/ABCG2/HDHD3/CDC40/SYNE1/KAT2B/SEC63/RNASE4/PRKACA/FAT4/PEX3/DNAJB9/PIK3R…
REACTOME_TOLL_LIKE_RECEPTOR_CASCADES	153	0.503313	2.30638	0.000239234	0.00110632	0.000523932	9476	tags=49%, list=19%, signal=40%	MAP2K1/FGG/LBP/FGA/FGB/PPP2R1B/CD14/APOB/IRAK2/MAPK14/PLCG2/SIGIRR/RPS6KA3/NKIRAS1/CTSL/RIPK1/IKBKG/SAA1/HSP90B1/IRF7/CTSS/PIK3R4/SFTPD/CTSB/MEF2A/CNPY3/LGMN/CUL1/TIRAP/BIRC2/PIK3C3/TICAM2/MAP2K3/MYD88/TLR4/EEA1/TICAM1/ECSIT/UNC93B1/TANK/PELI2/MAP3K7/NKIRAS2/RBSN/DUSP6/IRAK4/PTPN11/DUSP3/RELA/IRAK3/BIRC3/AGER/PPP2CB/MAP2K7/TAB1/TAB2/DNM2/TLR3/ITGB2/RPS6KA2/PTPN4/MAPK8/MAP2K6/MEF2C/NFKBIB/PELI1/TA…
BIOCARTA_AMI_PATHWAY	20	0.756438	2.30565	0.000225124	0.00110632	0.000523932	2759	tags=60%, list=5%, signal=57%	PROC/PROS1/FGG/F10/FGA/FGB/F7/TFPI/SERPINC1/F2/PLG/COL4A4
KEGG_PANTOTHENATE_AND_COA_BIOSYNTHESIS	16	0.803424	2.30556	0.000222618	0.00110632	0.000523932	5092	tags=56%, list=10%, signal=51%	UPB1/VNN1/PANK1/DPYS/DPYD/ENPP1/COASY/BCAT2/ENPP3
REACTOME_REMOVAL_OF_AMINOTERMINAL_PROPEPTIDES_FROM_GAMMA_CARBOXYLATED_PROTEINS	10	0.922878	2.30433	0.000222321	0.00110632	0.000523932	1618	tags=80%, list=3%, signal=77%	PROZ/PROC/PROS1/F10/F7/FURIN/F9/F2
REACTOME_TRYPTOPHAN_CATABOLISM	14	0.836364	2.30366	0.000224316	0.00110632	0.000523932	1800	tags=57%, list=4%, signal=55%	HAAO/AADAT/TDO2/IDO2/ACMSD/KYAT1/KYNU/AFMID
GOZGIT_ESR1_TARGETS_UP	149	0.504197	2.30365	0.000238892	0.00110632	0.000523932	6869	tags=40%, list=14%, signal=35%	ANPEP/ACSL5/AGXT/GLDC/ACACB/ACAA2/CEBPA/PC/NT5E/DST/NR1H3/XDH/STS/IGFBP3/TH/SMPDL3A/PRKAG2/GRAMD1C/ADAMTSL4/VTN/FYN/REEP6/ECM1/FERMT2/PLD1/FP236241.1/FAM13A/ACSF2/AL162171.1/ITSN1/THSD7A/CRAT/TCF7L2/PLCL2/SORCS2/NMRK1/PIM1/BLNK/GNAI1/PPARG/CYP11A1/CLSTN3/DPEP2/CYP26A1/FAM49A/TCIRG1/MARC1/SLC18B1/VSIR/NAGA/SEPT6/BMP2K/SKP2/SMIM2-AS1/GAS1/PKDCC/GDPD5/SRSF11/FHL1/LAMB1
REACTOME_MITOCHONDRIAL_FATTY_ACID_BETA_OXIDATION_OF_SATURATED_FATTY_ACIDS	11	0.896272	2.29914	0.000225225	0.00110632	0.000523932	2854	tags=82%, list=6%, signal=77%	ACADS/ACADM/ACADL/ACADVL/ECHS1/ACSM3/HADHA/HADHB/HADH
REACTOME_GLUCONEOGENESIS	34	0.664146	2.29811	0.000225479	0.00110632	0.000523932	4304	tags=44%, list=9%, signal=40%	SLC37A4/PCK2/PC/GOT1/FBP1/GOT2/SLC25A13/SLC25A10/PCK1/ALDOB/ALDOC/G6PC/ENO3/FBP2/SLC25A1
BOQUEST_STEM_CELL_CULTURED_VS_FRESH_UP	426	0.443707	2.29772	0.000259202	0.00110632	0.000523932	6066	tags=34%, list=12%, signal=30%	CBS/COL18A1/IL6R/CD302/ACSL5/PSAT1/CFI/METTL7A/MAF/SLC43A1/APOE/ACACB/ATF5/SERPINF1/CDH2/HLF/LMO7/CFH/ZBTB16/FMO3/PDK4/ANG/ECM2/CXCL2/CES1/EGFR/N4BP2L1/TENM1/F10/SLC43A3/ENPEP/SCG5/MTSS1/KLF9/FOXO1/CFHR2/ABCA6/SORBS1/MT1M/MAN1A1/NR1H3/BCHE/FXYD1/TMEM176A/MAOA/NDRG2/IGF1/AGTR1/TFPI/PRG4/APOC1/PTPRD/CDO1/MET/ANO1/AKR1C1/MOCOS/ANGPTL4/ZBTB20/SELENOP/RORA/TGM2/C6/PPP1R3C/SPRY2/KLF11/SYNPO/MAN1C1/MAFB…
REACTOME_ARACHIDONIC_ACID_METABOLISM	59	0.592412	2.29749	0.000226347	0.00110632	0.000523932	4622	tags=41%, list=9%, signal=37%	CYP4A22/CYP4A11/CYP8B1/CYP2C9/CYP1A2/PON3/CYP4F3/CYP2C19/CYP2C8/PON1/CYP4F11/EPHX2/CYP2J2/HPGD/CYP4F2/AKR1C3/CYP1A1/PTGR1/GPX2/CYP2U1/CBR1/DPEP2/PTGR2/PON2
REACTOME_PHOSPHOLIPID_METABOLISM	206	0.480532	2.29505	0.00024558	0.00110632	0.000523932	8530	tags=42%, list=17%, signal=35%	PNPLA3/LPCAT3/GPAM/GPD1/MTMR10/TMEM86B/MFSD2A/PIK3C2G/DGAT2/BCHE/PLA2G2A/LPIN2/AGPAT3/PCYT2/PEMT/MTMR4/ETNPPL/RAB14/MGLL/PLA1A/PITPNM2/PCTP/AGPAT2/PLD1/TNFAIP8L1/PLA2G15/CSNK2A2/MTM1/PIK3R1/PTEN/CHKA/HADHA/PLEKHA5/HADHB/PI4K2B/PNPLA8/CHPT1/ETNK2/VAC14/PNPLA7/CRLS1/PLEKHA3/PLEKHA1/PIK3R4/SLC44A1/PNPLA2/LPIN1/PNPLA6/PIK3C3/PLD3/PIKFYVE/GPAT3/PLA2G1B/LPIN3/PLEKHA2/PITPNM1/DGAT1/PIK3CD/MTMR14/INPP5E/…
WENG_POR_DOSAGE	21	0.743349	2.29339	0.000225785	0.00110632	0.000523932	5604	tags=71%, list=11%, signal=64%	CES2/CYP2C18/VNN1/CYP2C8/RETSAT/FGL1/ENTPD5/ANTXR2/CYP7A1/ACOT2/ACOT1/HMOX1/SLCO1A2/GSTM1/GADD45B
JOHNSTONE_PARVB_TARGETS_2_DN	341	0.45267	2.29273	0.000252016	0.00110632	0.000523932	7709	tags=33%, list=15%, signal=28%	EHBP1/SLC38A4/HS3ST3B1/NADK2/LEPR/DPYD/DST/CPNE8/GLUD1/PRKCA/MMUT/PLPP3/PDZD8/GBE1/TRAM2/TTC39C/ENPP1/MYLK/IRS1/RBFOX2/MAPK14/SEC24B/SLC31A1/DOCK4/NR3C1/SCML1/XRN1/EPM2AIP1/NECTIN3/ARRDC3/CAMK2D/PLEKHA5/LIN7C/LRP6/ZFYVE28/RREB1/ECI2/HADH/VPS13A/UBR2/NFX1/SLC39A8/PDGFC/CRYZ/TCAF1/FIGN/SNRNP48/PTPRG/SLC5A3/MAGT1/SRD5A1/MANEA/KIF13A/SLC44A1/FAM126A/TPST1/CDC5L/CYB5A/DERA/IFRD1/OPA1/SMIM13/RUNDC3B/C6…
GUILLAUMOND_KLF10_TARGETS_DN	29	0.685653	2.2913	0.000222866	0.00110632	0.000523932	6066	tags=52%, list=12%, signal=46%	AQP9/GPD1/VNN1/ENPEP/OIT3/AK3/SLC2A2/RCAN1/CHPT1/CYB5R3/CTSS/RTN4/CLEC4F/TXNIP/PAPSS2
REACTOME_METABOLIC_DISORDERS_OF_BIOLOGICAL_OXIDATION_ENZYMES	36	0.653539	2.29113	0.000227635	0.00110632	0.000523932	3544	tags=47%, list=7%, signal=44%	SLC35D1/UGT1A4/FMO3/GCLC/CYP27A1/UGT1A1/CYP7B1/MAOA/FDX1/ACY1/MAT1A/CYP17A1/CYP2U1/OPLAH/GCLM/TPMT/CYP11A1
REACTOME_FCERI_MEDIATED_CAPLUS2_MOBILIZATION	85	0.548868	2.29097	0.000230627	0.00110632	0.000523932	12446	tags=56%, list=25%, signal=43%	VAV2/TEC/NFATC3/PLCG2/IGHV4-39/ITPR2/IGLV1-47/NFATC2/PPP3R1/TXK/SOS1/LYN/CALM1/IGLV3-1/LCP2/IGKV3-20/IGHV2-70/IGKV2-28/IGLC2/IGHV3-7/SYK/IGHV3-23/IGHV4-59/IGKV1-39/IGLV2-23/IGHV3-48/IGKV2-30/IGKV1-5/FCER1A/IGKV2D-30/IGLV1-40/IGLV1-51/IGKV1-12/IGLV2-11/IGKV4-1/IGHV3-33/IGLV2-14/IGKV1-16/IGLC3/IGLV3-19/IGHV2-5/IGKV1D-39/BTK/IGKV1-17/IGHV4-34/ITPR1/PLCG1/IGKV3-11
LINDGREN_BLADDER_CANCER_CLUSTER_2B	388	0.446435	2.28903	0.000257069	0.00110632	0.000523932	9162	tags=39%, list=18%, signal=32%	COL18A1/ANPEP/CD302/ALDH2/MAF/SERPINF1/HLF/SLC7A2/SERPING1/PROS1/ECM2/SLC16A2/DHODH/C1R/MT1X/MT1H/SLC43A3/C1S/RARRES2/CFL2/MT1E/PALM2-AKAP2/RBP5/NNMT/FLVCR2/MT2A/HHEX/MT1G/STOM/C4A/ST6GAL1/FYN/IQGAP2/GPC6/GFOD1/MYLK/AKAP12/CCL15/SYNPO/PCOLCE/MAFB/MALT1/STXBP6/LIG4/TNS1/ADORA2A/COG8/STARD4/PPTC7/DNAJB9/SIRPA/LATS2/SH2B3/A2M/TMEM131L/SLC2A4RG/NEK6/TACC1/MT1L/HLA-E/GRK5/SELE/TCF25/FAM126A/TPST1/CXCL…
DEBIASI_APOPTOSIS_BY_REOVIRUS_INFECTION_DN	276	0.4633	2.28852	0.000250941	0.00110632	0.000523932	8747	tags=40%, list=17%, signal=33%	POR/DIO1/KHK/METTL7A/SLC37A4/GLDC/SLC27A2/SHMT1/GPLD1/LRP5/BDH1/ALDH1B1/KANK1/C4B/ATP7B/TBC1D2B/PCYT2/SORL1/SLC38A10/GRHPR/ZCCHC24/IDH1/PARP4/GALK1/RRBP1/INSIG1/PDE8A/PLCG2/XPC/ERCC5/ZBED1/GGCX/DEPP1/MAPRE2/GAMT/SULT1A2/OCEL1/PMPCA/PRPSAP1/ITSN1/UBR2/ST3GAL1/IGF2R/TYK2/PDIA4/FUCA1/CBR1/HIRA/TCF25/GNAI2/SPTBN2/FGFR3/IMPA2/ABCA2/MYOM2/PNPLA6/MAP2K3/ITGA7/SCAF11/SUOX/SEC16A/POLG/DHCR24/ULK1/MBTPS1/A…
REACTOME_CYP2E1_REACTIONS	11	0.892018	2.28823	0.000225225	0.00110632	0.000523932	1880	tags=73%, list=4%, signal=70%	CYP2D6/CYP2C9/CYP2A6/CYP2A7/CYP2C19/CYP2C8/CYP2B6/CYP2E1
BIOCARTA_IL7_PATHWAY	16	0.797301	2.28799	0.000222618	0.00110632	0.000523932	7635	tags=69%, list=15%, signal=58%	PTK2B/FYN/IL7/PIK3R1/STAT5B/JAK1/CREBBP/STAT5A/PIK3CA/NMI/EP300
REACTOME_ASSEMBLY_OF_ACTIVE_LPL_AND_LIPC_LIPASE_COMPLEXES	19	0.758961	2.2872	0.000223514	0.00110632	0.000523932	5080	tags=68%, list=10%, signal=62%	ANGPTL3/PCSK6/ANGPTL8/APOA5/LIPC/CREB3L3/FURIN/APOC2/ANGPTL4/FGF21/APOA4/CIDEC/MBTPS1
REACTOME_RA_BIOSYNTHESIS_PATHWAY	22	0.73276	2.28621	0.000224467	0.00110632	0.000523932	4858	tags=64%, list=10%, signal=58%	RDH16/ALDH8A1/RDH10/DHRS3/RDH5/ALDH1A1/AKR1C3/ALDH1A2/ADH1A/ADH1C/ADH4/DHRS4/RDH11/CYP26A1
KEGG_PHENYLALANINE_METABOLISM	18	0.769749	2.28044	0.000223664	0.00110632	0.000523932	6127	tags=61%, list=12%, signal=54%	TAT/PAH/MAOA/MAOB/GOT1/GOT2/DDC/HPD/AOC2/AOC3/PRDX6
REACTOME_CHYLOMICRON_ASSEMBLY	10	0.913003	2.27968	0.000222321	0.00110632	0.000523932	1862	tags=90%, list=4%, signal=87%	APOE/P4HB/APOC2/APOA2/MTTP/APOA1/APOB/APOC3/APOA4
REACTOME_N_GLYCAN_TRIMMING_IN_THE_ER_AND_CALNEXIN_CALRETICULIN_CYCLE	35	0.653149	2.27842	0.000226091	0.00110632	0.000523932	9635	tags=57%, list=19%, signal=46%	AMFR/SEL1L/CALR/EDEM1/OS9/RNF185/SYVN1/GANAB/MOGS/PRKCSH/RNF103/ENGASE/VCP/MAN1B1/RAD23B/UGGT1/EDEM2/MLEC/RNF5/NGLY1
REACTOME_PLATELET_ACTIVATION_SIGNALING_AND_AGGREGATION	259	0.464391	2.27781	0.000249377	0.00110632	0.000523932	7333	tags=36%, list=15%, signal=31%	IGF2/CLU/SERPING1/A1BG/PROS1/FGG/F5/ITIH3/RARRES2/FGA/FGB/ABHD6/VAV2/PRKCA/ORM1/SERPINA4/IGF1/APOOL/SERPINF2/SPP2/ORM2/MGLL/ITIH4/SELENOP/FYN/APOA1/AHSG/ECM1/TF/KNG1/F2RL2/F2/HRG/APOH/MAPK14/PLG/PLCG2/APLP2/RAPGEF4/ALB/SERPINA1/PIK3R1/CDC37L1/TMX3/CLEC1B/A2M/SYTL4/HABP4/HSPA5/RAF1/APBB1IP/GNAI2/ITPR2/GNAI1/HGF/CRK/SERPINA3/GNAQ/PSAP/CSK/GNA11/FN1/SOS1/PRKCE/ADRA2B/SOD1/TLN1/ARRB2/LYN/CHID1/CLEC3B…
GINESTIER_BREAST_CANCER_ZNF217_AMPLIFIED_UP	68	0.571146	2.27657	0.00022899	0.00110632	0.000523932	10970	tags=57%, list=22%, signal=45%	ANG/N4BP2/WASHC4/BTD/KLHL20/AGAP4/SMIM14/SCAF11/CYP20A1/SPPL2A/LACTB/FAM114A1/UFL1/LPP/ATP6V1A/F8/KCTD20/HEATR3/STX16/ESR1/GNB5/SNX9/LEPROT/SF3B1/TRAK2/STAG2/DNAJB14/ADD1/DNAJC21/SLC17A5/BMPR2/ATG12/TRIP11/WSB1/GINM1/PDP2/SRSF10/POLK/ANAPC5
KEGG_B_CELL_RECEPTOR_SIGNALING_PATHWAY	75	0.558318	2.27344	0.000229043	0.00110632	0.000523932	9394	tags=47%, list=19%, signal=38%	MAP2K1/VAV2/NFATC3/CD81/AKT2/PIK3AP1/PLCG2/MALT1/PIK3R1/IKBKG/CHP1/BLNK/PPP3CC/RAF1/NFATC2/NFAT5/LILRB3/PPP3R1/FCGR2B/SOS1/PIK3CD/LYN/RELA/PIK3R5/AKT1/PIK3CA/SYK/SOS2/INPP5D/PTPN6/NFKBIB/CD72/PRKCB/MAP2K2/MAPK1
JIANG_TIP30_TARGETS_DN	24	0.712542	2.27302	0.00022482	0.00110632	0.000523932	2875	tags=42%, list=6%, signal=39%	IGF2/ASS1/CIDEB/AKAP1/PEBP1/BLCAP/SIRPA/CALR/FGFR4/DHX38
REACTOME_CITRIC_ACID_CYCLE_TCA_CYCLE	22	0.72853	2.27301	0.000224467	0.00110632	0.000523932	9983	tags=68%, list=20%, signal=55%	SDHA/SUCLG2/NNT/SDHD/FAHD1/DLD/SDHB/FH/OGDH/SUCLA2/ACO2/DLST/MDH2/SUCLG1/IDH3A
BURTON_ADIPOGENESIS_5	114	0.517657	2.27238	0.000233209	0.00110632	0.000523932	10523	tags=52%, list=21%, signal=41%	ACSL1/IGF2/POR/ACADM/C3/CEBPA/PC/SORBS1/IVD/ESRRA/FDX1/ECHS1/ETFB/GPHN/GUCD1/PEX14/GK/DNAJB9/PPIF/AIFM1/RREB1/MYORG/CHP1/CRAT/PPARG/SDHD/RMDN3/COQ9/LPIN1/PEX11A/ORMDL3/ATL2/BCL2L13/RPP14/MIGA2/TOB1/SIPA1/PDIA6/TIMM8A/GRPEL1/PRDX3/RMC1/MAPK6/MRPL12/CISD1/ACO2/PTCD3/IFNGR1/TYSND1/MDH2/CLOCK/MRPL34/PTGES2/MPC2/AK2/GINM1/PRPS1/TMEM97/PHB2
REACTOME_METABOLISM_OF_ANGIOTENSINOGEN_TO_ANGIOTENSINS	17	0.779372	2.2721	0.000223364	0.00110632	0.000523932	3589	tags=47%, list=7%, signal=44%	ANPEP/AGT/CES1/ENPEP/CPB2/CTSZ/MME/REN
DING_LUNG_CANCER_MUTATED_FREQUENTLY	12	0.860768	2.26967	0.000224972	0.00110632	0.000523932	5549	tags=58%, list=11%, signal=52%	FYN/IRAK2/LTK/BAP1/ACVR1B/NOTCH4/STK11
REACTOME_RECYCLING_OF_BILE_ACIDS_AND_SALTS	16	0.790769	2.26925	0.000222618	0.00110632	0.000523932	2158	tags=69%, list=4%, signal=66%	ABCB11/SLC10A1/RXRA/ABCC3/SLCO1B3/NR1H4/SLC27A5/BAAT/STARD5/SLCO1B1/ALB
PID_CXCR4_PATHWAY	101	0.529081	2.26868	0.00023245	0.00110632	0.000523932	8694	tags=49%, list=17%, signal=40%	FOXO1/ITGA5/GNAO1/ITGA1/PTK2B/ITCH/FYN/STAT2/CD4/VPS4A/PIK3R1/PTEN/STAT5B/GNAI2/GNAI1/CRK/CXCL12/STAT3/PLCB2/ITGA7/CSK/ITGA9/FGR/MAPKAP1/MTOR/BLK/PAG1/GRK2/PIK3CD/ARRB2/LYN/PTPN11/SSH1/PIK3R5/RICTOR/STAT5A/AKT1/PXN/PIK3CA/VPS4B/GNG2/BCAR1/PTPRC/PTPN6/JAK2/UBQLN1/PIK3R6/ITGA4/STAT1
REACTOME_UREA_CYCLE	10	0.908322	2.26799	0.000222321	0.00110632	0.000523932	1607	tags=70%, list=3%, signal=68%	NAGS/ASS1/ARG1/ASL/CPS1/OTC/SLC25A15
SIG_IL4RECEPTOR_IN_B_LYPHOCYTES	27	0.692324	2.26731	0.00022604	0.00110632	0.000523932	9416	tags=56%, list=19%, signal=45%	AKT2/IRS1/PIK3R1/IRS2/STAT6/IL4R/RAF1/JAK1/SOS1/PIK3CD/AKT1/PIK3CA/SOS2/MAPK1/PDPK1
MARKEY_RB1_ACUTE_LOF_DN	227	0.468833	2.26708	0.000246731	0.00110632	0.000523932	8817	tags=36%, list=18%, signal=30%	C2/SH3BGRL2/SERPING1/GATM/FNDC3A/CYP4V2/NT5E/ABCA1/GADD45A/XDH/NDRG2/PLIN2/IGFBP3/HP/ALDH1A2/STAB1/SMPDL3A/CCL23/MT2A/CTSZ/STOM/AK4/CCL15/CHCHD10/TGOLN2/ALDOC/MSRB1/ACP2/NAMPT/CFP/SAT1/IFIT2/SAA1/MBD1/PLAC8/PLA2G7/IRF7/IFIH1/IFIT3/CTSB/LGMN/CMPK2/UBA7/GRN/ARNT/EGLN1/C1QC/ITGAX/GABPA/CSF1R/SKAP2/TAPBP/FCGR2B/PNP/RBBP9/DDX3Y/MPEG1/IRF9/PFKL/ATP6V1B2/TOR1AIP2/SOD2/IL18BP/C1QB/TBC1D22A/LILRA5/GRINA/H…
PID_IFNG_PATHWAY	40	0.631326	2.26624	0.000229253	0.00110632	0.000523932	9682	tags=57%, list=19%, signal=46%	MAP2K1/DAPK1/MAP3K11/PIK3R1/CAMK2D/RAPGEF1/STAT3/SMAD7/JAK1/MTOR/CEBPB/IRF9/CREBBP/PTPN11/AKT1/PIK3CA/CAMK2B/EP300/JAK2/IFNGR1/STAT1/MAPK1/PTGES2
TAKEDA_TARGETS_OF_NUP98_HOXA9_FUSION_3D_UP	183	0.481661	2.2655	0.000242836	0.00110632	0.000523932	8370	tags=45%, list=17%, signal=38%	SERPING1/VNN1/DST/GALNT2/SCN9A/QPRT/C19orf66/IGFBP4/ALDH1A1/PTPRD/ACSM3/CYP1A1/ZBTB20/TRIM25/IGHM/STAT2/HLX/HELZ2/HERC6/XAF1/HERC5/CRHBP/CCDC71L/ARRDC4/IFIT2/CCL18/IFIT1/SLC5A3/IRF7/IFIH1/IFIT3/IFIT5/KIF13A/REN/CLSTN3/MX1/PBX3/CMPK2/PARP14/IFI44/SCN2A/NFAT5/TTC28/PARP12/BISPR/SDSL/TXK/CREBRF/DTX3L/DDX58/EIF2AK2/IRF9/OASL/MYCT1/OAS2/BMP2K/LY6E/SP110/DDX60L/DDX60/ERMAP/PARP9/JCHAIN/C5orf56/IFI44L/E…
CADWELL_ATG16L1_TARGETS_UP	97	0.531953	2.26549	0.000232775	0.00110632	0.000523932	2983	tags=31%, list=6%, signal=29%	PLIN1/ACAA1/PLIN4/CFI/SERPINA10/VNN1/DGAT2/NPC1L1/PC/THRSP/HAO2/APOC2/HP/AP1M1/ETNPPL/MTTP/FCGRT/RBP4/APOA1/FABP1/TF/KCTD14/APOA4/LTK/CYP2E1/CD163/TRIM15/C1QTNF1/ZKSCAN1/KIAA1671
SARRIO_EPITHELIAL_MESENCHYMAL_TRANSITION_DN	153	0.494001	2.26371	0.000239234	0.00110632	0.000523932	7501	tags=39%, list=15%, signal=33%	ACSL1/CLU/ERRFI1/ZBTB16/AQP3/VNN1/DAPK1/C1S/PC/TUT7/DST/CFB/GLUD1/ALDH6A1/MAOA/TFPI/IL1R1/KYNU/NFE2L1/STOM/SELENOP/MME/SAA4/INSIG1/MAFB/ADH1C/PTEN/CREG1/ENG/CALD1/SAT1/IL1RN/RSRP1/FGFR3/SERPINA3/STAT3/IFI44/MAP3K5/PSAP/KLRK1/PLXNB1/NFE2L2/CCNG1/NFIL3/SCD/SOD2/IFITM3/EFNA1/EEF2/SNCAIP/GAS1/RNF145/BIRC3/BCL6/BTG1/SND1/USP15/PNRC1/KLRC3
BIOCARTA_GH_PATHWAY	27	0.690868	2.26255	0.00022604	0.00110632	0.000523932	9394	tags=59%, list=19%, signal=48%	GHR/MAP2K1/HNF1A/PRKCA/INSR/IRS1/PIK3R1/STAT5B/RAF1/SOS1/STAT5A/PIK3CA/PTPN6/JAK2/PRKCB/MAPK1
BOYAULT_LIVER_CANCER_SUBCLASS_G23_DN	10	0.905455	2.26083	0.000222321	0.00110632	0.000523932	4771	tags=100%, list=9%, signal=91%	COBLL1/ACO1/SORD/N4BP2L1/SERPINF2/CDO1/STARD5/PTH1R/RAMP3/PDE2A
BLALOCK_ALZHEIMERS_DISEASE_INCIPIENT_UP	387	0.441084	2.26048	0.000257533	0.00110632	0.000523932	7825	tags=35%, list=16%, signal=30%	IL6R/SGK2/ADGRA3/CLU/C5/CYP4F3/CEBPA/PC/AC129492.1/PAH/SCLY/CYP39A1/HAO2/AGTR1/CPT2/APOC1/MT1F/FGL1/MET/ARID4A/ITPRID2/ITGA1/AGFG2/DAO/FYN/KDSR/APOC4/PTH1R/APOL2/MALT1/KAT2B/SEC63/GGCX/FAXDC2/ZHX3/HERC5/GAMT/QKI/CSNK2A2/CPQ/CTSL/CPM/IL13RA1/NAMPT/SLC19A1/OS9/ZC3H7B/TACC1/MBP/FNBP1/CTDSP1/ZNF444/HS2ST1/ARHGEF15/SLC35C1/CTSS/RXRB/NFIC/NDST1/CYP11A1/CLDN5/TCN2/CFLAR/CNPY3/AKAP13/OSBPL11/FGFR3/CDC5L/…
ZHENG_BOUND_BY_FOXP3	478	0.432151	2.25997	0.000262812	0.00110632	0.000523932	10554	tags=42%, list=21%, signal=33%	CNGA1/TUBE1/ABTB2/COBLL1/GRB14/MUC20/HJV/NT5E/MAN1A1/IMPA1/RRAS2/TEC/ELMO1/CPOX/RAPGEF2/CCDC198/HECTD1/NR5A2/AKR1D1/IDH1/SLC35B4/SLC23A2/DIPK1A/DTX4/IFNAR2/IBTK/PTK2B/ENPP1/ZBTB20/ST6GAL1/RNF125/FYN/KDSR/SIK3/KBTBD11/EVI5/PRRG4/SMAP2/GPHN/JMJD1C/MALT1/SPTBN1/SATB1/NUS1/LATS2/LRCH1/RBL2/TPP2/CYTH1/S1PR1/L3MBTL3/SPG7/ECI2/PTPRK/TCTEX1D1/FAM76B/CRADD/GRIA3/HK3/PPP3CC/MAP4K4/FAS/AGPS/IRF2/APBB1IP/ITP…
RODWELL_AGING_KIDNEY_NO_BLOOD_DN	147	0.495701	2.25988	0.000238265	0.00110632	0.000523932	7140	tags=41%, list=14%, signal=36%	GHR/ABCA5/AMT/FMO5/PHYH/KLF9/PPP2R1B/GABARAPL1/MMUT/ALDH6A1/CTH/LRRC2/GOT2/DHTKD1/ADH5/PEBP1/KNG1/CPEB3/DBT/BCKDHB/APLP2/SCML1/FAM171A1/MPC1/AASS/PEG3/FOLH1/MTO1/ADCY1/HADHB/ECI2/THSD7A/NNT/PPM1K/THRB/TMEM38B/NUDT4/CYB5A/ENOSF1/NDUFS1/C1orf226/SLC16A7/SLC22A23/LINC00667/GSTM4/RTN4/TSPAN7/KLHL24/BTBD11/PLPPR1/GATB/LINC02344/USP9X/FBXO21/ISOC1/NEDD4L/RBM14/LRPPRC/FBXO3/PRDX3/ATP5F1A
PID_VEGFR1_2_PATHWAY	69	0.564554	2.25935	0.000228519	0.00110632	0.000523932	9607	tags=52%, list=19%, signal=42%	MAP2K1/FES/PRKCA/PTK2B/AKAP1/VTN/FYN/KDR/MAPK14/CAMKK2/PRKAA1/PRKACA/PIK3R1/GRB10/CDH5/RAF1/MAP2K3/NOS3/PRKAB1/PTPN11/GAB1/PAK2/AKT1/PXN/PIK3CA/ITGB3/DNM2/MAP2K6/PTPN6/ROCK1/PRKCB/NCK1/MAP2K2/MAPK1/PDPK1/VEGFA
PID_IL1_PATHWAY	34	0.652803	2.25886	0.000225479	0.00110632	0.000523932	7787	tags=56%, list=15%, signal=47%	IL1RAP/IL1R1/PIK3R1/TOLLIP/IKBKG/IL1RN/MAP3K3/TICAM2/MYD88/MAP3K7/IL1R2/IRAK4/RELA/IRAK3/PIK3CA/TAB1/TAB2/MAPK8/MAP2K6
ONDER_CDH1_TARGETS_1_UP	139	0.498508	2.25806	0.000235682	0.00110632	0.000523932	7542	tags=37%, list=15%, signal=31%	MST1/METTL7A/APOE/PCK2/ZBTB16/ANG/GCLC/CYP4F3/EGFR/LRP5/IL1RAP/LEPR/KLF9/AC129492.1/PRKCA/COQ8A/CYP4F11/GABARAPL1/ALDH6A1/CTH/AKR1C3/AKR1C1/PAN2/PRKAG2/EPHX1/RNASE4/DNAJB9/PHGDH/GPX3/BLNK/FTL/ZNF516/N4BP2L2/PPFIBP1/HERC1/KLHL24/NR1D2/KHNYN/TXNIP/ZNF451/PGM3/SEC24D/BCL6/IGFBP2/CDKN1B/BTN3A3/P3H1/PNRC1/THEMIS2/FAM117A/INPP5D
PID_IL6_7_PATHWAY	47	0.608658	2.25798	0.000228154	0.00110632	0.000523932	8694	tags=51%, list=17%, signal=42%	IL6R/FGG/LBP/FOXO1/MAPK14/PIK3R1/A2M/TYK2/HSP90B1/STAT3/JAK1/CEBPB/IL6ST/SOS1/CEBPD/PTPN11/CRP/GAB1/AKT1/PIK3CA/MCL1/MAP2K6/JAK2/STAT1
ZHAN_MULTIPLE_MYELOMA_PR_DN	49	0.601818	2.25549	0.000228102	0.00110632	0.000523932	9046	tags=51%, list=18%, signal=42%	DPYD/FGD4/NR3C2/TK2/ZBTB20/SMAP2/JMJD1C/KAT2B/SATB1/CYLD/CBX7/BLNK/PPM1K/PAXIP1-AS2/ALCAM/UBE2QL1/EPS15/PRDM2/BAZ2B/GAB1/ZHX2/NLK/TBC1D10C/ANKRD44/SYNE2
REACTOME_DEFECTS_IN_COBALAMIN_B12_METABOLISM	14	0.818844	2.2554	0.000224316	0.00110632	0.000523932	3595	tags=57%, list=7%, signal=53%	AMN/MMUT/MMAA/MMACHC/ABCD4/LMBRD1/MMAB/TCN2
BOYAULT_LIVER_CANCER_SUBCLASS_G6_DN	19	0.748308	2.25509	0.000223514	0.00110632	0.000523932	4713	tags=58%, list=9%, signal=52%	LSR/GATA6/RRBP1/INPP1/TNS1/TRIM15/RFTN1/OSBPL9/CMTM6/SDC4/RAB27A
KEGG_ABC_TRANSPORTERS	44	0.616263	2.25396	0.000228624	0.00110632	0.000523932	5309	tags=48%, list=11%, signal=43%	ABCC2/ABCB11/ABCA5/ABCG5/ABCC3/ABCG8/ABCA8/ABCB4/ABCA6/ABCA1/ABCC6/ABCD4/ABCA9/ABCG2/ABCA10/ABCD3/ABCB1/ABCA2/ABCB7/TAP2/ABCC9
URS_ADIPOCYTE_DIFFERENTIATION_UP	66	0.568512	2.2526	0.000228519	0.00110632	0.000523932	3622	tags=33%, list=7%, signal=31%	ACSL1/ATP2B2/RXRA/AMT/AGT/GPD1/ECM2/LBP/LIPC/FXYD1/ALDH6A1/PLIN2/MASP1/INSR/ALDH1A2/VTN/APOB/STAT5B/AL162171.1/PPARG/RXRB/SKAP1
GOLDRATH_IMMUNE_MEMORY	64	0.571058	2.25108	0.000227324	0.00110632	0.000523932	10340	tags=55%, list=21%, signal=44%	AQP9/PROS1/GOLIM4/CYP4V2/SORBS1/IFNAR2/ANGPTL4/FCGRT/ANTXR2/PDE8A/GK/RNASE4/PLEKHA5/CHPT1/ABCB1/TIRAP/IL15RA/LPIN1/USP48/IL10RA/IL10RB/ANKH/PRKCE/PRNP/NR1D2/AC139768.1/SOS2/RECK/VKORC1/PRSS12/TRAF1/ECI1/RNF138/PLCD1/DOCK9
ZHENG_FOXP3_TARGETS_IN_T_LYMPHOCYTE_DN	38	0.6354	2.25055	0.000229568	0.00110632	0.000523932	10126	tags=50%, list=20%, signal=40%	ABTB2/BACH2/DIPK1A/PTK2B/SATB1/LRCH1/TGFBR2/JAK1/RCBTB2/UTRN/PTPRC/PELI1/NIPBL/ANKRD44/SYNE2/WIPF1/SCML4/MS4A6A/MS4A4A
ICHIBA_GRAFT_VERSUS_HOST_DISEASE_D7_UP	112	0.513503	2.24917	0.000232072	0.00110632	0.000523932	7982	tags=41%, list=16%, signal=35%	SERPINA10/LBP/CD14/ATP11A/ORM1/XDH/IL18R1/MARCO/CCL15/FKBP5/CD5L/CRYAA2/NAMPT/PLAC8/FAS/AC026470.1/IRF7/IL1RN/CTSS/IFIT3/SERPINA3/IRF8/UBA7/PLD3/C1QC/VCAM1/TAPBP/NFKBIZ/IL6ST/TAP2/NEK9/MPEG1/ITPK1/PTPN1/IL18BP/LCP2/C1QB/SAMHD1/LILRA5/AKAP9/SHISA5/GIMAP4/IFI35/SNX10/USP41/FGL2
PID_TCPTP_PATHWAY	42	0.620454	2.24886	0.000227169	0.00110632	0.000523932	7009	tags=52%, list=14%, signal=45%	EGFR/MET/INSR/ITGA1/LMAN1/KDR/INS/PIK3R1/STAT5B/STAT6/HGF/STAT3/JAK1/CSF1R/SOS1/EIF2AK2/PIK3CD/CREBBP/PTPN1/GAB1/STAT5A/PIK3CA
TSUNODA_CISPLATIN_RESISTANCE_DN	49	0.599572	2.24707	0.000228102	0.00110632	0.000523932	3558	tags=35%, list=7%, signal=32%	CLU/SLC27A2/ASS1/C3/SORD/C1S/CFB/GALNT2/CPS1/IGFBP4/ESRP2/KYNU/C4BPB/EPAS1/ELL2/ID1/CTSB
MORI_LARGE_PRE_BII_LYMPHOCYTE_DN	56	0.586072	2.24686	0.000228154	0.00110632	0.000523932	11217	tags=55%, list=22%, signal=43%	ALDH2/DTX1/IL4R/CTSS/IRF8/UBA7/VCAM1/IL10RA/LPP/SIPA1/SAMHD1/BIRC3/BTG1/MACF1/SOAT1/RGS14/MCL1/CXCR5/PIP4K2A/PTPRC/PTPN6/ADCY7/PXK/HIP1R/WIPF1/DOCK2/RIPOR2/LCP1/GMIP/GNS/SLC25A53
MOOTHA_GLUCONEOGENESIS	31	0.662609	2.24665	0.000224618	0.00110632	0.000523932	3512	tags=39%, list=7%, signal=36%	GPT/PCK2/GPD1/PC/FBP1/PCK1/CD4/ALDOB/GK/ALDOC/ENO3/FBP2
PID_MET_PATHWAY	79	0.546598	2.24663	0.00023015	0.00110632	0.000523932	9416	tags=47%, list=19%, signal=38%	MAP2K1/MUC20/MET/AKT2/RANBP10/F2RL2/PIK3R1/RAPGEF1/DEPTOR/RAF1/HGF/CRK/NUMB/MTOR/SOS1/EPS15/ETS1/PTPN1/PTPN11/GAB1/PAK2/AKT1/PXN/SH3KBP1/PIK3CA/WASL/BCAR1/RPTOR/RANBP9/MAPK8/CDH1/AKT1S1/NCK1/MAP2K2/RAB5A/MAPK1/PDPK1
PID_P38_MKK3_6PATHWAY	26	0.691022	2.24533	0.000225124	0.00110632	0.000523932	7787	tags=54%, list=15%, signal=46%	GADD45A/MAPK14/CCM2/TAOK3/MAP3K3/MAP3K5/MAP2K3/MAP3K7/GADD45B/ATM/TAB1/CAMK2B/TAB2/MAP2K6
PID_TCR_PATHWAY	65	0.567598	2.2453	0.000227428	0.00110632	0.000523932	10431	tags=43%, list=21%, signal=34%	PRKCA/FYN/CD4/MALT1/PTEN/RASSF5/SH3BP2/IKBKG/STIM1/MAP3K14/CSK/PAG1/SOS1/PRKCE/FYB1/PTPN11/LCP2/WAS/AKT1/RASGRP2/PTPRC/PTPN6/PRKCB/NCK1/PRKCQ/PDPK1/ZAP70/TRAF6
REACTOME_MITOCHONDRIAL_BIOGENESIS	94	0.528614	2.24431	0.000231	0.00110632	0.000523932	8500	tags=39%, list=17%, signal=33%	PRKAB2/RXRA/PPARA/GLUD1/POLRMT/APOOL/ESRRA/PRKAG2/ALAS1/MAPK14/HELZ2/ACSS2/PPARGC1A/GLUD2/PPARGC1B/PRKAG3/NCOR1/GABPA/SIRT5/CHD9/SIRT4/PRKAB1/DMAC2L/SOD2/CREBBP/CALM1/TFB1M/NCOA2/POLG2/ATP5F1A/DNAJC11/ATP5F1D/CRTC2/MEF2C/TBL1X/SIRT3/CARM1
TARTE_PLASMA_CELL_VS_B_LYMPHOCYTE_UP	80	0.544081	2.24391	0.000229568	0.00110632	0.000523932	11021	tags=45%, list=22%, signal=35%	IL6R/AQP3/ANG/MAN1A1/PDIA5/P4HB/TRAM2/SEL1L/GGCX/HAGH/ELL2/HSP90B1/HSPA5/IGLV1-47/PLOD1/IL15RA/PLD3/CD38/AARS/HSD17B8/IGKC/TM9SF2/PDIA6/GAS6/TRAM1/CASP10/FGL2/FKBP2/TRIB1/HYOU1/HDLBP/YIF1A/DUSP7/HEXB/CANX/SLC35B1
KEGG_CYSTEINE_AND_METHIONINE_METABOLISM	34	0.648441	2.24377	0.000225479	0.00110632	0.000523932	1514	tags=32%, list=3%, signal=31%	CBS/BHMT/TAT/SDS/CTH/MPST/GOT1/CDO1/GOT2/ADI1/MAT1A
ZHU_CMV_8_HR_DN	50	0.597053	2.24245	0.000228833	0.00110632	0.000523932	8245	tags=52%, list=16%, signal=44%	APOE/ACO1/AKR1C1/HNMT/MAPK14/ERCC5/ADH1B/NR3C1/ENG/ITSN1/TCF7L2/TMEM198B/TNFRSF1A/AR/ID2/ZCCHC9/AARS/IL6ST/ACVR2A/CEBPD/GAS1/IGFBP2/AHR/MARCKS/RBMS1/NR2F2
MORI_MATURE_B_LYMPHOCYTE_UP	86	0.536107	2.24069	0.000231107	0.00110632	0.000523932	11015	tags=55%, list=22%, signal=43%	APOE/MAP2K1/ABCA1/MAN1A1/SORL1/SMAP2/SH3BP2/SGPP1/GNPNAT1/FAM76B/CMTM6/CTSS/IRF8/FAM102A/IL10RA/ADRB2/IL10RB/CERS2/LPP/ETS1/MYCBP2/SAMHD1/YTHDC1/AC139768.1/MACF1/RGS14/CNOT6L/RAB8A/TBC1D14/MCL1/CXCR5/PIP4K2A/PTPRC/MEF2C/PTPN6/ADD1/JAK2/ADCY7/IFNGR1/PXK/TMOD3/PISD/RIPOR2/LCP1/ZFP36L1/HLA-DOA/ID3
RUTELLA_RESPONSE_TO_HGF_UP	420	0.432864	2.23847	0.000259134	0.00110632	0.000523932	10457	tags=40%, list=21%, signal=32%	SDC2/SNTB1/APOE/FZD5/SERPINF1/PCK2/AQP9/ACAA2/ABCC3/VNN1/CYP27A1/ACO1/CES1/C3/PHYH/MT1X/MT1H/SLC43A3/C1S/KLF9/NR1H3/HSD11B1/PINK1/MAOA/PLPP3/RDX/APOC1/ATP13A3/MT1F/IL1R1/ST3GAL6/FBP1/KYNU/SLC30A1/FDX1/GOT2/DIPK1A/ACAT1/MT2A/ELOA/SC5D/ALDH3A2/AKR1C1/MT1G/MGLL/CD81/STOM/TGM2/ALAS1/CCL15/SLC31A1/SUN2/DOCK4/CREG1/CTSL/CTBS/PVR/CPM/PPIF/RFTN1/FAH/OPTN/TMBIM6/SLC1A2/ST3GAL1/LAMP1/SCARB2/CCL18/CRYZ/NCOA…
WANG_CISPLATIN_RESPONSE_AND_XPC_DN	219	0.464611	2.23358	0.000247097	0.00110632	0.000523932	8984	tags=40%, list=18%, signal=33%	LCAT/AGXT/MYO1B/EHHADH/SERPING1/MASP2/UGP2/G0S2/GADD45A/IL1R1/PARP4/ACKR4/SEPHS2/CDA/ITIH4/STOM/FERMT2/MED13/HLX/CDC40/SP100/LGALS4/ATG13/CELF1/TMCO6/ACP2/SLC31A2/RNF185/NRG1/TNFRSF10B/MAN2A2/PTPRG/GNAI1/GALNS/NT5C2/CNPY3/DNAJA2/TOM1/NRP1/NMT1/TLK1/MT1B/SMAD7/KALRN/ACVR1/CEBPB/TANK/C16orf58/PNP/SLCO1A2/SDHB/KLF10/INPP5E/SLC12A4/BTN3A1/KHNYN/TSC1/NOP14/PTPN11/FADS3/TFPI2/EDC4/ZNF451/HBP1/PTPRT/EFR…
REACTOME_PHENYLALANINE_AND_TYROSINE_METABOLISM	11	0.869156	2.22958	0.000225225	0.00110632	0.000523932	2982	tags=73%, list=6%, signal=68%	TAT/HGD/PAH/KYAT1/QDPR/HPD/FAH/GSTZ1
KEGG_ACUTE_MYELOID_LEUKEMIA	57	0.579553	2.22887	0.00022899	0.00110632	0.000523932	9394	tags=49%, list=19%, signal=40%	ZBTB16/MAP2K1/CEBPA/AKT2/PIK3R1/STAT5B/IKBKG/TCF7L2/PIM1/RAF1/STAT3/MTOR/ARAF/SOS1/PML/PIK3CD/RELA/PIK3R5/STAT5A/AKT1/PIK3CA/SOS2/RPS6KB2/TCF7L1/MAP2K2/SPI1/RPS6KB1/MAPK1
GARGALOVIC_RESPONSE_TO_OXIDIZED_PHOSPHOLIPIDS_TURQUOISE_UP	82	0.537093	2.22559	0.000231	0.00110632	0.000523932	9162	tags=46%, list=18%, signal=38%	CNKSR3/GABARAPL1/SLC25A25/PTP4A1/CCDC82/RORA/ERN1/SPRY2/PTGR1/AKAP2/NECTIN3/CLDN15/ARRDC3/MERTK/DUSP1/ZNF697/IPMK/NRG1/ZCCHC2/GCLM/CFLAR/ACVR1/FAM126B/CREBRF/KLF10/ARHGAP5/MYCT1/TIPARP/PRNP/DUSP3/RICTOR/AHR/ZFP36/FGFR1OP2/SGK1/DIDO1/CCDC117/CLIC2
BIOCARTA_EIF4_PATHWAY	24	0.69715	2.22392	0.00022482	0.00110632	0.000523932	9416	tags=67%, list=19%, signal=54%	GHR/PRKCA/IRS1/MAPK14/PDK2/PIK3R1/PTEN/MTOR/MKNK1/EIF4G1/AKT1/PIK3CA/PRKCB/RPS6KB1/MAPK1/PDPK1
APPEL_IMATINIB_RESPONSE	33	0.646069	2.22255	0.00022482	0.00110632	0.000523932	7884	tags=58%, list=16%, signal=49%	APOE/APOC1/CTSZ/PLD1/CD163/CTSL/ENG/LAMP1/FUCA1/PPARG/CTSB/CTSA/LILRB3/PLSCR1/CD68/ACP5/GUSB/CD300A/HEXA
THUM_SYSTOLIC_HEART_FAILURE_DN	205	0.464789	2.22074	0.000243784	0.00110632	0.000523932	9818	tags=46%, list=19%, signal=37%	H19/CHDH/LMO7/KLF12/SORBS2/SPAG9/AC129492.1/KCNJ8/AGPAT3/RAPGEF2/MMP15/ZBTB48/DLC1/ETNPPL/ZBTB20/USH2A/FCN3/DNAJC16/FP236241.1/SYNE1/SPTBN1/GGCX/PPTC7/AIG1/EPN1/LATS2/PLEKHA5/IP6K3/ELL2/RNPC3/TACC1/DOCK5/MAP4K4/SCAND2P/PPM1K/SNHG26/CFLAR/ZNF189/NCOR1/PSD3/ARHGEF7/EGLN1/GPAT3/PPM1A/STOX2/PER3/CDC42BPA/LINC00667/METAP2/SCAF11/NBEAL1/DPF3/FAM126B/MLLT10/PLEKHA2/CFDP1/COX15/PPFIBP1/MBD4/FGFR1OP/KMT5B…
SHEDDEN_LUNG_CANCER_GOOD_SURVIVAL_A4	197	0.467744	2.21998	0.0002457	0.00110632	0.000523932	7725	tags=41%, list=15%, signal=35%	IL6R/ALDH8A1/ALDH5A1/ZBTB16/AQP3/PON3/FMO5/HSD17B11/AC129492.1/CYP2B6/PLS3/ATP11A/ABCC6/PON1/LPIN2/MAOA/RAPGEF2/FAM184A/FBP1/DLC1/MEGF9/STBD1/EPHX1/TNS2/DLEC1/LTK/SYNE1/GGCX/APLP2/NR3C1/QKI/AASS/FAM13A/HDAC5/EDEM1/CPM/DUSP1/SLC39A8/TRIM2/ST3GAL5/LRRC20/ZER1/SFTPD/NPR1/CYB5A/KLHL20/ZFAND5/ATXN7/PMM1/UBAP1/MBIP/CDC42BPA/NAV2/NOS3/PON2/RAB27A/RUFY3/UNC93B1/UNC13B/NBPF10/TIPARP/CAMTA2/GNA14/CEBPD/CYP…
HORTON_SREBF_TARGETS	24	0.695771	2.21952	0.00022482	0.00110632	0.000523932	4803	tags=46%, list=10%, signal=41%	PCSK9/SC5D/INSIG1/ACSS2/ELOVL6/ALDOC/STARD4/LSS/CYP51A1/RDH11/TM7SF2
CHEMNITZ_RESPONSE_TO_PROSTAGLANDIN_E2_DN	387	0.432692	2.21747	0.000257533	0.00110632	0.000523932	8998	tags=41%, list=18%, signal=34%	ADGRA3/SIK2/CHDH/SHMT1/LMO7/ACAA2/FMO5/GATM/LIME1/MIA2/FNDC3A/CYP4V2/KCNT2/TJP2/GBA3/GIPC2/CNKSR3/GLUD1/NLRX1/CCDC198/PTPRD/MET/AOX1/MMP15/BPHL/PARP4/SHH/NAPEPLD/FUT6/ALDH3A2/ZBTB20/RBP4/KIF1C/FOXP2/C6/TMEM245/TCAIM/KIAA2013/GPC6/AKAP12/DBT/PDSS2/LNP1/DNAJC16/XPC/STXBP6/ITFG1/ACSS2/SPATS2L/CXADR/NUS1/LRRK2/SATB2/EDNRB/KCNK5/KIF1B/RELN/FGF14-AS2/PIGV/RBL2/SLC2A9/MON1B/COBL/LMTK2/SDHAF3/OCLN/GPRC5C…
KEGG_LINOLEIC_ACID_METABOLISM	29	0.663167	2.21616	0.000222866	0.00110632	0.000523932	1880	tags=45%, list=4%, signal=43%	CYP3A5/CYP2C18/CYP2C9/CYP1A2/CYP3A43/CYP2C19/CYP3A4/CYP2C8/PLA2G2A/CYP2J2/PLA2G12B/CYP3A7/CYP2E1
STEARMAN_TUMOR_FIELD_EFFECT_UP	35	0.635203	2.21582	0.000226091	0.00110632	0.000523932	6590	tags=51%, list=13%, signal=45%	WDR81/SERPINA10/F7/LRG1/APOC1/MYO7A/CTSZ/ITIH4/CCL15/SIRPA/SAT1/SCARB2/CTSS/PLD3/ITGAX/MPEG1/PLET1/ACP5
BERENJENO_TRANSFORMED_BY_RHOA_DN	386	0.432275	2.21527	0.000256805	0.00110632	0.000523932	9960	tags=43%, list=20%, signal=35%	SARDH/GHR/ATF5/LMO7/PCK2/PDK4/ACADM/FAM8A1/PHYH/C1R/ST3GAL2/KLF9/CYP4V2/MARC2/HSD17B11/AC129492.1/GAS2/TBX15/MAOA/XDH/ALDH1A1/SCP2/NNMT/CDO1/BPHL/IL11RA/IDH1/CPT1A/MT2A/MAN2A1/AKAP12/SYNPO/PCOLCE/SEL1L/SPTBN1/RNASE4/APLP2/GAMT/DECR1/ECH1/NRBP2/LSS/PIK3R1/NACC2/PTEN/CPQ/TCEA3/SMAD6/LRP6/CX3CL1/MYORG/GRB10/GSTZ1/ST3GAL5/ATP6V0A1/PLA2G7/GNAI2/ITPR2/RSRP1/ARSA/SMARCA2/TPP1/CXCL12/CYP51A1/NYNRIN/GRN/C…
BAELDE_DIABETIC_NEPHROPATHY_DN	435	0.427248	2.21497	0.000259943	0.00110632	0.000523932	7891	tags=35%, list=16%, signal=30%	SDC2/GHR/MYO1B/AQP3/ACADM/ECM2/CXCL2/UGP2/N4BP2L1/APOL1/C1R/G0S2/ENPEP/C1S/RARRES2/MTSS1/DST/PLS3/KANK1/GNE/GADD45A/RDX/ATP13A3/HPGD/ST3GAL6/TMED5/PTPRD/NFE2L1/LSR/NFATC3/TRAM2/RHEBP1/MEGF9/ZBTB20/FYN/MME/IQGAP2/PCK1/SERINC1/MYLK/MYO1E/KBTBD11/PTH1R/FERMT2/IRS1/SYNPO/PLCG2/PEX14/NR3C1/SP100/CXADR/DNAJB9/AASS/SULT1A2/RCAN1/TLE4/TMEM259/HTRA1/CALD1/PARD3/NAMPT/DUSP1/COL4A4/GLUD2/OPTN/PDLIM5/THSD7A/…
OHGUCHI_LIVER_HNF4A_TARGETS_UP	48	0.593214	2.21185	0.000227221	0.00110632	0.000523932	5987	tags=46%, list=12%, signal=40%	PSAT1/FMO3/PDK4/SULT2A1/CYP2C8/LEPR/SULT1E1/CYP39A1/HAO2/SLC22A9/SERPINA7/ACOT2/ABCB1/IL1RN/REN/ACOT1/IFI44/SLC16A7/RAB27A/GSTM1/GADD45B/TXNIP
BIOCARTA_BIOPEPTIDES_PATHWAY	29	0.6618	2.21159	0.000222866	0.00110632	0.000523932	9394	tags=69%, list=19%, signal=56%	AGT/MAP2K1/PRKCA/PTK2B/FYN/KNG1/F2/MAPK14/RAF1/STAT3/GNA11/SOS1/CALM1/STAT5A/MAPK8/JAK2/STAT1/PRKCB/MAP2K2/MAPK1
CAVARD_LIVER_CANCER_MALIGNANT_VS_BENIGN	31	0.652119	2.21108	0.000224618	0.00110632	0.000523932	4956	tags=42%, list=10%, signal=38%	CES1/A1CF/FGA/FGB/DPYD/CD14/AKR1C1/FABP1/PTGR1/DPP4/FST/GGH/DUSP22
OSWALD_HEMATOPOIETIC_STEM_CELL_IN_COLLAGEN_GEL_DN	280	0.446489	2.20913	0.000249875	0.00110632	0.000523932	9073	tags=40%, list=18%, signal=33%	ALDH2/SIK2/ATF5/SERPINF1/H6PD/ASS1/CES1/MT1X/MT1H/KANSL1L/MT1E/RRAS2/GADD45A/THNSL1/MMUT/PLPP3/SCN9A/AMFR/MT1F/AKR1D1/MT2A/MT1G/PTPRB/MSMO1/DBT/KLF13/PLG/RIOK3/MAPRE2/TNS1/ALDOC/CYLD/GABPB1-IT1/ALB/FAM13A/MTRF1/BNIP3/GOLGA8A/IL13RA1/CALD1/ZKSCAN1/GPRC5C/UBR2/ID1/OTUD4/SNX19/RRAGD/AC026470.1/MEF2A/RSRP1/MAP3K2/ZNF277/ERAP1/MINDY3/PEX11A/SPEN/KIAA1109/IFI44/TLK1/NFAT5/ANKRD6/LIAS/FCGR2B/SAFB/IL17RB…
KYNG_DNA_DAMAGE_UP	207	0.462304	2.20888	0.000246609	0.00110632	0.000523932	10600	tags=49%, list=21%, signal=39%	LDHD/ALDH8A1/SLC6A1/GCLC/AVPR1A/LRP1/EGFR/LIPC/ADH6/CYP39A1/PCYT2/SLC6A12/IL1R1/MET/POFUT1/HELZ/IL18R1/GSTA2/RBP4/HNMT/BDH2/DBT/CHRNE/SMAD4/ERCC5/LIG4/RPS6KA3/MGAT2/ITIH2/CXADR/NDEL1/STAT5B/FOLH1/MYO5B/HIBADH/GNPNAT1/IGFBP1/PHF3/PTPRK/UBR2/ATP6V0A1/AC026470.1/AP1G1/FAN1/SKAP1/NCOR1/ARNT/CYB5A/EML4/BAP1/STAT3/NRK/LRRFIP2/VCAM1/PHLDA1/AKAP6/SOX7/SIRT5/RUFY3/PPP1R12C/PDHA1/SCD/RNF168/AHCY/LCP2/CTNND…
REACTOME_INTERFERON_GAMMA_SIGNALING	91	0.521943	2.20513	0.000230309	0.00110632	0.000523932	12051	tags=56%, list=24%, signal=43%	GBP7/MT2A/TRIM25/SP100/TRIM14/CAMK2D/TRIM26/TRIM35/HLA-E/TRIM2/IRF2/IRF7/TRIM10/IRF8/IRF5/VCAM1/JAK1/PML/IRF9/OASL/OAS2/TRIM38/PTPN1/PTPN11/GBP4/GBP5/TRIM8/MID1/TRIM22/GBP1/HLA-A/CAMK2B/PTPN6/TRIM5/JAK2/OAS3/IRF3/IFNGR1/STAT1/HLA-B/HLA-F/HLA-DPA1/IRF6/HLA-H/TRIM21/IRF1/PIAS1/IRF4/HLA-DQA2/HLA-DRB1/HLA-DPB1
PHONG_TNF_RESPONSE_VIA_P38_COMPLETE	224	0.456511	2.20447	0.00024564	0.00110632	0.000523932	9264	tags=38%, list=18%, signal=31%	METTL7A/MYO1B/WWC2/TUT7/SPAG9/ACOX1/GABARAPL1/ITGA5/ZCCHC24/IDH1/ALDH3A2/HHEX/MSMO1/INSIG1/ELOVL6/NR3C1/MGAT2/MAP3K11/SATB2/BACH1/ETS2/MTHFD2L/ZBTB5/PTPRK/MBP/GLG1/UBR2/OTUD4/ITSN2/TCAF1/MAP4K4/SLC5A3/SEC24A/CRK/EHD3/C2orf42/NUDT4/PSD3/MLXIP/AFF1/ERAP1/EXT1/FOXO3/CUX1/PNP/CDC42EP1/SOS1/RAP2C/MBD4/TRIM24/KLF10/NOTCH1/STK11/RBM19/CCNL1/SKP2/CAPN7/NCOA2/NXF1/SEC24D/MID1/BTG1/HMBOX1/KMT2A/NKTR/KLRC3/…
PID_KIT_PATHWAY	52	0.583167	2.20334	0.000229253	0.00110632	0.000523932	9416	tags=50%, list=19%, signal=41%	MAP2K1/TEC/PIK3R1/PTEN/SH2B3/GRB10/RAF1/STAT3/FOXO3/SOS1/LYN/CREBBP/EPOR/PTPN11/GAB1/STAT5A/AKT1/PIK3CA/MAPK8/PTPN6/JAK2/SNAI2/STAT1/MAP2K2/RPS6KB1/PDPK1
JOSEPH_RESPONSE_TO_SODIUM_BUTYRATE_DN	60	0.566048	2.20306	0.00022604	0.00110632	0.000523932	7977	tags=50%, list=16%, signal=42%	ABCC2/CYP4A11/ALAD/F10/ADH6/SULT1E1/FES/ATP7B/NUCB1/ALDH1A1/G6PC/PYGL/A2M/ACP2/NAMPT/STAT6/THSD7A/IRF2/ALPK2/CUL1/AFF1/TXK/PFKL/GAA/CAPN7/C7/CLCN3/FSTL1/HSPG2/VEGFB
BONOME_OVARIAN_CANCER_POOR_SURVIVAL_UP	31	0.64972	2.20294	0.000224618	0.00110632	0.000523932	11939	tags=74%, list=24%, signal=57%	ZBTB16/LEPR/PDE8A/SEC63/FAT4/PEX3/THSD7A/SIRT1/PSD3/CERK/ITM2B/TSPAN7/UBL3/HERC1/SRSF11/RECK/EID1/REV3L/KL/CCPG1/TAX1BP1/TTC37/RB1CC1
REACTOME_PYRUVATE_METABOLISM_AND_CITRIC_ACID_TCA_CYCLE	55	0.575117	2.19838	0.000228624	0.00110632	0.000523932	10386	tags=53%, list=21%, signal=42%	RXRA/PDK4/ADHFE1/SDHA/SUCLG2/PDK2/MPC1/HAGH/NNT/GSTZ1/LDHAL6B/PDPR/SDHD/SLC16A1/FAHD1/DLD/SDHB/PDHA1/D2HGDH/FH/OGDH/SUCLA2/ACO2/DLST/MDH2/SUCLG1/MPC2/IDH3A/PDP2
NELSON_RESPONSE_TO_ANDROGEN_UP	84	0.527865	2.1978	0.000230627	0.00110632	0.000523932	8909	tags=48%, list=18%, signal=39%	MAF/ABHD2/SORD/PHYH/PALM2-AKAP2/CDC14B/HPGD/ORM2/SELENOP/LMAN1/IQGAP2/AKAP12/HOMER2/HSD17B14/CAMKK2/FKBP5/DNAJB9/ELL2/SAT1/PDLIM5/AL162171.1/LIFR/ID2/ANKH/AZGP1/DHCR24/UNC13B/PLPP1/ZBTB10/SCD/SLC38A2/PGM3/SEC24D/HERC3/UGDH/HMGCS1/B4GALT1/SGK1/TMPRSS2/RBM10
REACTOME_CD22_MEDIATED_BCR_REGULATION	60	0.564529	2.19715	0.00022604	0.00110632	0.000523932	12446	tags=57%, list=25%, signal=43%	IGHM/IGHV4-39/IGLV1-47/LYN/IGLV3-1/IGKV3-20/IGHV2-70/IGKV2-28/IGLC2/IGHV3-7/IGHV3-23/PTPN6/IGHV4-59/IGKV1-39/IGLV2-23/IGHV3-48/IGKV2-30/IGKV1-5/IGKV2D-30/IGLV1-40/IGLV1-51/IGKV1-12/IGLV2-11/IGKV4-1/IGHV3-33/IGLV2-14/IGKV1-16/IGLC3/IGLV3-19/IGHV2-5/IGKV1D-39/IGKV1-17/IGHV4-34/IGKV3-11
FOSTER_TOLERANT_MACROPHAGE_UP	158	0.476616	2.19358	0.000239063	0.00110632	0.000523932	8923	tags=42%, list=18%, signal=34%	ACSL1/ASS1/SLC7A2/F10/PHLPP1/CFB/ZC3H12C/ORM1/ADHFE1/SLC13A3/CCDC68/MET/HP/MARCO/PIK3AP1/SLC31A1/RIOK3/XAF1/ADORA2A/PVR/SMAD6/CP/ELL2/SPIC/SLC31A2/ZFAND3/CCDC71L/ZDHHC18/SAA1/PPP3CC/IRF7/IL1RN/ITGAL/AOAH/IFRD1/TNFRSF1B/IFI44/ATXN7L1/RGL1/ID2/CD38/SMAD7/NAV2/CEP85L/TANK/PLPP1/MREG/IL18BP/GPR18/MCHR1/IRAK3/NRIP2/ZDHHC2/SYK/FGL2/OAS3/LRRC4/C9orf43/TRIM23/SGK1/RNF149/FBRSL1/STAT1/SERPINB9/SMURF1/IGSF6
JIANG_HYPOXIA_NORMAL	201	0.460234	2.19263	0.000243962	0.00110632	0.000523932	7978	tags=36%, list=16%, signal=30%	HLF/LRP1/UGP2/NT5E/CIDEB/NDRG2/PLIN2/GSTA1/IGFBP3/P4HB/SLC30A1/LSR/ANGPTL4/STOM/AK4/TGM2/STBD1/PPP1R3C/AGPAT2/DPP4/AKAP12/MSMO1/MVK/ALDOC/SIRPA/DDX19B/CTSL/TCEA3/STAU1/SESN2/BNIP3/TMEM30A/CHPT1/DUSP1/NEK6/ZNF395/GRB10/PDGFC/SPATA20/HSPA5/MAGT1/FBXO8/ENOSF1/NMT1/NIT1/RIPK4/PJA2/DCAF6/HMOX1/SNX4/KDM2B/PTPRU/IMMP2L/GADD45B/SERBP1/PI4K2A/SCD/SOD2/CDC34/WAPL/HLA-A/ADD3/PEX26/SNX9/PLOD2/ATF7IP/UGCG/ZFP…
AMUNDSON_RESPONSE_TO_ARSENITE	218	0.456253	2.19243	0.000246975	0.00110632	0.000523932	11019	tags=46%, list=22%, signal=36%	AGXT/SLC22A1/SLC43A1/KLF12/KIFC3/MT1X/MT1H/LEPR/MT1E/PRKCA/CTH/PLIN2/ARNTL/MT1F/ESRRA/NFE2L1/DLC1/HIBCH/MT1G/AKAP1/PCK1/PTPRB/ETS2/TAOK3/TLE4/MT1L/STAT6/IGF2R/CTDSP1/TNFRSF10B/ST3GAL5/ATP6V0A1/PIK3R4/PLOD1/TPP1/CHERP/GRN/ZFAND5/TNKS/EXT1/CTSA/CDK6/ITGAX/IL10RA/MT1B/MED16/FOXO3/CHD2/HPS5/CEBPB/IL6ST/N4BP2L2/CLK1/TANK/SOD1/CEBPG/CPEB4/BMP2K/NFE2L2/LYN/ATP10D/PRNP/MAN1A2/ST13/TSC1/BAG2/ZNF24/NKTR/UB…
REACTOME_SIGNALING_BY_ERYTHROPOIETIN	25	0.681197	2.19172	0.00022482	0.00110632	0.000523932	8192	tags=56%, list=16%, signal=47%	PLCG2/PIK3R1/STAT5B/RAPGEF1/IRS2/SOS1/PIK3CD/LYN/EPOR/GAB1/PIK3R5/STAT5A/PIK3CA/JAK2
VANHARANTA_UTERINE_FIBROID_DN	66	0.552941	2.1909	0.000228519	0.00110632	0.000523932	7891	tags=44%, list=16%, signal=37%	C1R/DAPK1/C1S/LEPR/RARRES2/ABCA8/TFPI/ADH1B/NR3C1/CXADR/NAMPT/CBX7/GSAP/ERAP1/MAP3K5/SMAD7/KLHL2/GIMAP6/APOL3/GADD45B/GSDME/BIRC3/BCL6/ABLIM1/MDFIC/ADD3/PTCH1/NFIB/PHYHIP
WENG_POR_TARGETS_LIVER_UP	37	0.620537	2.18849	0.000227583	0.00110632	0.000523932	5604	tags=51%, list=11%, signal=46%	CES2/CYP2C18/C11orf54/CYP2C8/TMEM176A/ALDH1A1/CSAD/ENTPD5/MSMO1/ANTXR2/CYP7A1/CYP51A1/CYP26A1/HMOX1/DHCR24/SLCO1A2/GSTM1/PRNP/GADD45B
REACTOME_BETA_OXIDATION_OF_VERY_LONG_CHAIN_FATTY_ACIDS	11	0.852852	2.18776	0.000225225	0.00110632	0.000523932	4478	tags=73%, list=9%, signal=66%	ACAA1/MLYCD/EHHADH/ACOX1/HSD17B4/ECI2/DECR2/ACOT6
REACTOME_INTEGRIN_SIGNALING	27	0.667845	2.18715	0.00022604	0.00110632	0.000523932	7601	tags=59%, list=15%, signal=50%	FGG/FGA/FGB/RAPGEF4/APBB1IP/CRK/CSK/FN1/SOS1/TLN1/PTPN1/AKT1/ITGB3/RASGRP2/SYK/BCAR1
WINTER_HYPOXIA_DN	51	0.580122	2.18438	0.00022941	0.00110632	0.000523932	9914	tags=55%, list=20%, signal=44%	SLC25A20/SYNE1/CHPT1/KLHDC1/RESF1/ABCB1/IRF8/SYNRG/GIMAP7/RGS5/CELF2/ENPP2/ATM/AC027097.1/GIMAP1/INPP5D/LRMP/PTPRC/PBXIP1/FLI1/IL16/IKZF1/NCKAP1L/ANKRD44/ARHGAP15/DOCK2/LMO2/RIPOR2
REACTOME_ACTIVATION_OF_GENE_EXPRESSION_BY_SREBF_SREBP	42	0.602404	2.18344	0.000227169	0.00110632	0.000523932	9130	tags=48%, list=18%, signal=39%	RXRA/ACACB/GPAM/PPARA/SC5D/MVK/HELZ2/ELOVL6/LSS/CYP51A1/CHD9/TM7SF2/SCD/CREBBP/NCOA2/HMGCS1/TBL1X/CARM1/NFYC/MVD
REACTOME_METABOLISM_OF_FOLATE_AND_PTERINES	17	0.748601	2.1824	0.000223364	0.00110632	0.000523932	2727	tags=53%, list=5%, signal=50%	SHMT1/ALDH1L1/MTHFD1/SLC46A1/MTHFS/SHMT2/MTHFD2L/FPGS/SLC19A1
RODRIGUES_NTN1_AND_DCC_TARGETS	34	0.630155	2.1805	0.000225479	0.00110632	0.000523932	5553	tags=41%, list=11%, signal=37%	H19/PPARA/MT1X/KLF9/MT1E/MT1F/MT2A/ETS2/CAMK2D/MAML3/TBC1D4/NFKBIZ/KLF10/ERO1B
HORIUCHI_WTAP_TARGETS_UP	305	0.436494	2.17925	0.000252461	0.00110632	0.000523932	8324	tags=37%, list=17%, signal=31%	ACSL5/CFI/PRKAB2/CFH/CXCL2/APOL1/FOXN3/ABCA1/CFB/SLC2A12/ALDH6A1/PLPP3/TFPI/KLHL21/IL1R1/ITGA1/ART4/HNMT/FNIP2/RORA/PPP1R3C/PCTP/INPP1/MAN1C1/MAFB/CPPED1/ITFG1/SEL1L/NR3C1/CPQ/CREG1/EDNRB/RFTN1/PLEK2/BIVM/SLC40A1/IGF2R/IFIT2/CEACAM1/ST3GAL5/PCGF5/SELE/CHN2/IFIH1/ITPR2/IFIT3/WHAMMP3/TCN2/SDC4/TPP1/CROT/COL27A1/IFRD1/ETFRF1/ERAP1/GLIS3/IFI44/VCAM1/PER3/ANKRD6/LETMD1/ACVR2B/KALRN/CHD2/TAPBP/MESD/CEB…
BREUHAHN_GROWTH_FACTOR_SIGNALING_IN_LIVER_CANCER	22	0.698032	2.17786	0.000224467	0.00110632	0.000523932	4386	tags=45%, list=9%, signal=42%	IGF2/EGFR/MET/IRS1/SMAD4/IRS2/HGF/TGFBR2/SMAD7/ERBB3
FARMER_BREAST_CANCER_APOCRINE_VS_LUMINAL	325	0.432597	2.1762	0.000253678	0.00110632	0.000523932	6389	tags=32%, list=13%, signal=28%	ACSL1/GHR/CLU/METTL7A/STEAP3/ASS1/PCSK6/ACAA2/CLDN1/ACADM/GNMT/HGD/ABHD2/CES1/EGFR/LBP/ECHDC1/ABCC6/FCN2/TLE1/ORM1/MAOA/HSD17B4/QPRT/MAOB/CYP2J2/IGFBP4/AMACR/KYNU/PGRMC1/AKR1D1/IDH1/DDC/SMPDL3A/ETFB/SEPHS2/SERPINA5/AK4/HSD17B2/MSMO1/MED13/ACAD8/SLC31A1/PRKAA1/APLP2/FKBP5/ELOVL2/PEX3/MCCC1/CPQ/SMCO4/CTBS/BNIP3/PPIF/NAMPT/ETFA/OPTN/RESF1/BLNK/NBR1/PKP2/AGPS/NAAA/SRD5A1/CHN2/DIP2C/PNISR/SGMS1/AR/SLP…
LIU_SOX4_TARGETS_UP	139	0.480404	2.17605	0.000235682	0.00110632	0.000523932	9895	tags=47%, list=20%, signal=38%	IL6R/CES2/MLYCD/KIFC3/EGFR/DST/PPP2R1B/HPN/TLE1/GABARAPL1/PLPP3/SORL1/ARL4D/RANBP10/MAN2A1/PDE8A/FCN3/HSDL2/C1orf115/MBP/NCOA4/SPSB3/SLC5A3/WBP1L/FAM107B/THRB/SLC33A1/LGMN/TBC1D13/IL10RB/TMEM143/CUX1/CREBRF/RBKS/USP31/KLHL24/PRDM2/BRAP/DMAC2L/PDS5A/EPDR1/PRDX6/TUT4/EMC1/HBP1/ENPP4/ADAM10/AGO1/BTN3A3/MPPE1/TNFSF10/ZNF318/LTN1/FYCO1/DICER1/TBL1X/BMPR2/PPT2/DDX18/KIAA0586/ERLIN2/ATRX/AC004475.1/TMED…
PID_CD8_TCR_PATHWAY	53	0.573104	2.17582	0.000228102	0.00110632	0.000523932	10431	tags=43%, list=21%, signal=34%	PRKCA/FYN/MALT1/RASSF5/IKBKG/STIM1/MAP3K14/PRF1/CSK/PAG1/SOS1/PRKCE/LCP2/HLA-A/AKT1/RASGRP2/PTPRC/PTPN6/PRKCB/PRKCQ/PDPK1/ZAP70/TRAF6
STEGER_ADIPOGENESIS_UP	21	0.704832	2.17456	0.000225785	0.00110632	0.000523932	3687	tags=52%, list=7%, signal=49%	ACSL1/CEBPA/NR1H3/HSD11B1/HP/STOM/PCK1/CP/PPARG/CIDEC/PNPLA2
KEGG_RENIN_ANGIOTENSIN_SYSTEM	17	0.745002	2.1719	0.000223364	0.00110632	0.000523932	4127	tags=41%, list=8%, signal=38%	ANPEP/AGT/ENPEP/AGTR1/MME/REN/CTSA
REACTOME_CIRCADIAN_CLOCK	70	0.540994	2.17139	0.000227739	0.00110632	0.000523932	9591	tags=43%, list=19%, signal=35%	RXRA/PPARA/KLF15/F7/AC129492.1/ARNTL/CPT1A/CRY2/RORA/HELZ2/PPARGC1A/NR3C1/NAMPT/SIRT1/NCOR1/CUL1/CHD9/NFIL3/CREBBP/NCOA2/SIK1/CRTC2/EP300/MEF2C/TBL1X/NPAS2/CARM1/ATF2/CLOCK/DBP
GOTTWEIN_TARGETS_OF_KSHV_MIR_K12_11	63	0.552375	2.17116	0.000227376	0.00110632	0.000523932	10109	tags=56%, list=20%, signal=44%	RXRA/GALT/MUC20/ABHD6/PITPNM2/AMOTL1/RNF123/XAF1/PLEKHA5/TLE4/SMAD6/MRGPRF/HSPA5/SLC33A1/FBXO33/C9orf78/RNF166/GBA2/ARHGAP21/PICALM/C2orf88/DPY19L1/ERMAP/SAMHD1/PRPF4B/PIK3CA/RFK/HMGCS1/SGPL1/SGK1/CDC42EP3/ARRDC2/USP8/SLA/PTDSS1
FARMER_BREAST_CANCER_CLUSTER_3	16	0.756348	2.17047	0.000222618	0.00110632	0.000523932	4395	tags=56%, list=9%, signal=51%	STEAP3/CLDN1/EGFR/KYNU/SLC31A1/PEX3/NAMPT/SRD5A1/MPP6
VANHARANTA_UTERINE_FIBROID_WITH_7Q_DELETION_DN	36	0.619093	2.17037	0.000227635	0.00110632	0.000523932	8437	tags=53%, list=17%, signal=44%	ALDH1B1/PINK1/CADM1/MICU1/PDE3B/PDE8A/PRRG1/NCOR1/EML4/WIPI2/AKAP6/COX15/GAA/VPS52/HEG1/CAV2/CLIC4/IFI16/VPS13D
REACTOME_SUMOYLATION_OF_INTRACELLULAR_RECEPTORS	30	0.644342	2.17029	0.000222767	0.00110632	0.000523932	3724	tags=43%, list=7%, signal=40%	RXRA/NR1I2/PPARA/NR1H4/NR1H3/NR3C2/NR5A2/RORA/NR2C1/NR3C1/PPARG/THRB/AR
ZHANG_ANTIVIRAL_RESPONSE_TO_RIBAVIRIN_UP	28	0.655879	2.16998	0.000225175	0.00110632	0.000523932	3618	tags=43%, list=7%, signal=40%	ALDH2/ASS1/CFH/APOL1/C1R/C1S/FGA/CD81/VTN/GPX2/IRF7/MX1
KIM_GERMINAL_CENTER_T_HELPER_DN	12	0.82258	2.16897	0.000224972	0.00110632	0.000523932	2780	tags=75%, list=6%, signal=71%	ACSM2A/AC129492.1/DHRS3/OSBP/RORA/SPTBN1/S1PR1/ELL2/IRS2
REACTOME_DISEASES_OF_CARBOHYDRATE_METABOLISM	34	0.626563	2.16807	0.000225479	0.00110632	0.000523932	3484	tags=38%, list=7%, signal=36%	KHK/SLC37A4/HYAL1/GBE1/GYS2/PPP1R3C/GYG2/ALDOB/DCXR/G6PC/ARSB/NAGLU/GALNS
ZHONG_SECRETOME_OF_LUNG_CANCER_AND_ENDOTHELIUM	63	0.551341	2.1671	0.000227376	0.00110632	0.000523932	5013	tags=37%, list=10%, signal=33%	COL18A1/C2/CLU/PZP/ALAD/CFL2/CFB/GOT1/IGFBP4/CTSZ/SERPINC1/AHSG/TF/ALB/A2M/CX3CL1/CP/TNXB/SDC4/CTSA/VCAM1/FN1/BGN
REACTOME_SYNTHESIS_OF_PE	13	0.80373	2.16676	0.000224568	0.00110632	0.000523932	9896	tags=100%, list=20%, signal=80%	LPIN2/PCYT2/ETNPPL/CHKA/ETNK2/LPIN1/LPIN3/PHOSPHO1/ETNK1/CEPT1/SELENOI/CHKB/PISD
LI_INDUCED_T_TO_NATURAL_KILLER_DN	139	0.478324	2.16663	0.000235682	0.00110632	0.000523932	10226	tags=49%, list=20%, signal=39%	ALDH2/GLDC/C3/N4BP2L1/FBP1/PDXP/ART4/CCL23/CENPV/CD81/ST6GAL1/CRYL1/ILVBL/PITPNM2/EPHX1/DPP4/DTX1/RMND5A/SLC5A9/SATB1/TAPT1/ETS2/HIBADH/PPP1R1C/TACC1/AQP11/ZER1/ITPR2/PPARGC1B/MIB2/TPST1/CXCL12/NAXD/TPCN1/COL6A1/ACVR2B/SNX30/IL17RB/BGN/RNPEPL1/IGIP/KLHL24/FYB1/TDRP/ETS1/CELF2/TXNIP/RAMP1/SETD1B/BRD3/AC139768.1/KMT2A/FAM78A/MARCKS/COX6A2/NISCH/NIPBL/PRKCB/ARHGAP15/ADGRE5/STK4/MAPK1/LMAN2L/SLC16A5/…
GOBERT_CORE_OLIGODENDROCYTE_DIFFERENTIATION	43	0.594082	2.16577	0.000227428	0.00110632	0.000523932	8159	tags=51%, list=16%, signal=43%	SLC25A27/IL6R/ATRN/SORBS1/ABCA1/ABAT/ELMO1/IKZF5/ZKSCAN1/MBP/AQP11/NUMB/EXT1/CDK6/ANKRD6/CCNG1/INPP5K/HBP1/DIXDC1/MAP7/RNF13/BCAS3
BILBAN_B_CLL_LPL_UP	64	0.548996	2.16412	0.000227324	0.00110632	0.000523932	6452	tags=39%, list=13%, signal=34%	SLC39A14/ABCA6/BACH2/ELMO1/SLC23A2/TMEM140/DIPK1A/CPT1A/ST6GAL1/RRBP1/AKAP12/DNMBP/PIM1/SERINC5/CEACAM1/SOWAHC/DIP2C/CYP51A1/JADE3/OAS2/SEPT10/CREB3L2/DMD/GPR18/GSDME
THUM_SYSTOLIC_HEART_FAILURE_UP	425	0.417507	2.16174	0.000259202	0.00110632	0.000523932	10287	tags=41%, list=20%, signal=33%	SDC2/NHSL1/CFI/ALDH4A1/ANG/CAT/CXCL2/C1S/LEPR/NT5E/HSD17B11/CD14/CFB/MAN1A1/CNKSR3/GADD45A/ARNTL/RDX/ST3GAL6/IGFBP3/PGRMC1/PLSCR4/SC5D/AKR1C1/AKAP1/ST6GAL1/RNF125/HNMT/TGM2/PPP1R3C/LMAN1/IGHM/NRAP/RIOK3/DPP9/DEPP1/ARHGAP24/PPP1R3B/MBNL2/VSNL1/MFN2/ABCD3/CYB5R3/ENG/NAMPT/CP/LAP3/LAMP1/SCARB2/PDGFC/GRIA3/NBR1/HSP90B1/PKP2/FAS/ANGPTL1/CTSS/CTSB/IL33/NAB1/CDH19/SLC16A1/TPP1/CXCL12/NFATC2/CDC5L/ZEB1/I…
KEGG_APOPTOSIS	87	0.515865	2.16119	0.000230521	0.00110632	0.000523932	7270	tags=39%, list=14%, signal=33%	IL1RAP/TNFRSF10D/IL1R1/AKT2/IRAK2/PRKACA/PIK3R1/RIPK1/AIFM1/IL3/IKBKG/CHP1/MAP3K14/TNFRSF1A/TNFRSF10B/PPP3CC/FAS/CFLAR/BIRC2/MYD88/ENDOG/PPP3R1/PIK3CD/IRAK4/ATM/RELA/PIK3R5/IRAK3/BIRC3/AKT1/PIK3CA/TNFSF10/PRKAR1B/APAF1
YAMAZAKI_TCEB3_TARGETS_UP	161	0.467777	2.16117	0.000238834	0.00110632	0.000523932	8798	tags=42%, list=17%, signal=34%	GHR/CLU/COBLL1/SERPING1/TST/ENPEP/FNDC3A/FURIN/GALNT2/TFPI/AMFR/NID1/IGFBP4/P4HB/FDX1/CTSZ/GATA6/TTR/SURF4/RRBP1/ERP44/PTH1R/EPAS1/GREM2/HERPUD1/MBNL2/BACH1/LMBRD1/DDAH1/TCF7L2/CDH5/PLOD1/SYCP3/CCNC/SLC16A1/LGMN/CUL1/EXT1/ID2/CD38/SEMA6A/PSAP/KALRN/YPEL2/GANAB/CYP26A1/CDC42EP1/LPP/MAN1A2/CALM1/NID2/GRINA/MDFIC/LAMB1/STARD10/PTPN9/PLOD2/LRPAP1/CASKIN2/CST3/HSPG2/EPHB4/NR2F2/P4HA1/B4GALNT2/MPZL2/CD…
REACTOME_ANTIGEN_PRESENTATION:_FOLDING_ASSEMBLY_AND_PEPTIDE_LOADING_OF_CLASS_I_MHC	25	0.671532	2.16062	0.00022482	0.00110632	0.000523932	11005	tags=72%, list=22%, signal=56%	SEC24B/CALR/HLA-E/HSPA5/SEC24A/ERAP1/TAPBP/SAR1B/TAP2/SEC31A/SEC24D/HLA-A/HLA-B/HLA-F/SEC24C/SEC23A/ERAP2/CANX
REACTOME_ENDOGENOUS_STEROLS	27	0.659239	2.15897	0.00022604	0.00110632	0.000523932	6794	tags=56%, list=13%, signal=48%	RXRA/CYP8B1/CYP27A1/CYP4V2/NR1H4/CYP7B1/CYP39A1/FDX1/CYP7A1/CYP11A1/CYP51A1/ARNT/PTGIS/NCOA2/AHR
REACTOME_TRIGLYCERIDE_BIOSYNTHESIS	14	0.782871	2.15632	0.000224316	0.00110632	0.000523932	4892	tags=79%, list=10%, signal=71%	MOGAT2/GPAM/MOGAT3/DGAT2/MOGAT1/LPIN2/AGMO/GK/LPIN1/LPIN3/DGAT1
REACTOME_TRIGLYCERIDE_METABOLISM	38	0.608637	2.15575	0.000229568	0.00110632	0.000523932	4892	tags=39%, list=10%, signal=36%	PLIN1/MOGAT2/GPAM/MOGAT3/DGAT2/MOGAT1/LPIN2/AGMO/MGLL/FABP1/GK/PRKACA/LPIN1/LPIN3/DGAT1
STARK_PREFRONTAL_CORTEX_22Q11_DELETION_UP	191	0.455255	2.15555	0.000242307	0.00110632	0.000523932	11652	tags=50%, list=23%, signal=38%	PRKAB2/ZBTB16/SLC6A1/FNDC3A/KLF9/LPIN2/TTC7B/LIN7A/PTK2B/MEGF9/CD99L2/BIN1/SETD7/CDC40/TEF/SPTBN1/MAPRE2/PIK3R1/NACC2/RHOU/CHKA/PTPRK/SLC1A2/CYGB/UBR2/B3GAT1/SKI/TRIM2/TCAF1/SOBP/GNAI1/NFIC/SMARCA2/EHD3/MAP3K2/SLC25A23/EGLN1/CYFIP2/ARGLU1/SLC4A4/CHD9/FAM49A/RIMBP2/SNX18/PRRC2B/ACVR1C/KLHL24/EPS15/NFIX/MINK1/CPEB2/MYCBP2/RBM25/UBQLN2/ANKRD11/ZEB2/TRIM8/UBTF/RICTOR/BSN/SRSF11/RNF165/DNM2/NR2C2/SAFB…
REACTOME_IRE1ALPHA_ACTIVATES_CHAPERONES	50	0.573718	2.15481	0.000228833	0.00110632	0.000523932	11019	tags=54%, list=22%, signal=42%	PDIA5/ACADVL/ERN1/EXTL2/DNAJB9/EDEM1/HSPA5/CXXC1/SYVN1/SRPRA/TPP1/DNAJC3/SULT1A3/SEC31A/TLN1/TATDN2/PDIA6/PREB/CTDSP2/HDGF/ADD1/HYOU1/YIF1A/ZBTB17/CUL7/GOSR2/ATP6V0D1
KEGG_BIOSYNTHESIS_OF_UNSATURATED_FATTY_ACIDS	22	0.69056	2.15455	0.000224467	0.00110632	0.000523932	8747	tags=64%, list=17%, signal=53%	ACAA1/PECR/ACOX1/BAAT/ELOVL6/ELOVL2/HADHA/ACOT2/ACOT1/HSD17B12/SCD/YOD1/TECR/FADS1
REACTOME_TOLL_LIKE_RECEPTOR_4_TLR4_CASCADE	127	0.48226	2.15386	0.000234247	0.00110632	0.000523932	10431	tags=50%, list=21%, signal=39%	MAP2K1/LBP/PPP2R1B/CD14/IRAK2/MAPK14/PLCG2/SIGIRR/RPS6KA3/NKIRAS1/RIPK1/IKBKG/SAA1/IRF7/SFTPD/MEF2A/CUL1/TIRAP/BIRC2/TICAM2/MAP2K3/MYD88/TLR4/TICAM1/ECSIT/TANK/PELI2/MAP3K7/NKIRAS2/DUSP6/IRAK4/PTPN11/DUSP3/RELA/IRAK3/BIRC3/AGER/PPP2CB/MAP2K7/TAB1/TAB2/DNM2/ITGB2/RPS6KA2/PTPN4/MAPK8/MAP2K6/MEF2C/NFKBIB/PELI1/TAB3/PPP2R5D/IRF3/UBE2D3/ATF2/VRK3/MAPK1/ELK1/TLR2/CD36/DUSP7/TLR1/TRAF6
RASHI_RESPONSE_TO_IONIZING_RADIATION_5	130	0.480762	2.15373	0.000235018	0.00110632	0.000523932	6231	tags=33%, list=12%, signal=29%	TDO2/GALT/SHMT1/ANG/F5/F7/CFHR1/KCNJ8/GIPC2/INHBC/CPOX/ATP13A3/P4HB/HMGCL/PPP1R3C/TXNRD2/KLF13/EVI5/TMEM170A/PDE8A/HSDL2/AKAP2/ADORA2A/PIK3R1/NACC2/SURF6/INVS/FRAT1/CHTF8/GRB10/MAP4K4/EPB41/CRK/ETFBKMT/LLGL2/PEX5/KSR1/EIF2AK2/GSTM1/MAP3K7/NFIX/LARP7/NCOA2
SESTO_RESPONSE_TO_UV_C5	46	0.5832	2.15357	0.000227894	0.00110632	0.000523932	12310	tags=67%, list=24%, signal=51%	CLINT1/MME/PIK3R4/SDC4/PBX3/TGFBR2/EXT1/WWP1/TLK1/PKN2/EIF2AK2/EPS15/NFE2L2/FAM120A/ABLIM1/CLIP1/CKAP5/METAP1/TIAM1/MCL1/CBFB/STAT1/PUM1/SLK/ZNF148/LDLR/SHB/RCOR1/PAFAH1B1/GTF3C2/NCOR2
YOSHIMURA_MAPK8_TARGETS_DN	352	0.423484	2.15227	0.000254065	0.00110632	0.000523932	8313	tags=36%, list=17%, signal=30%	SDC2/ACSL1/PSAT1/ABTB2/GPAM/MAP2K1/SULT2A1/UGT1A1/DHODH/C1R/ANKRD24/ARG1/GADD45A/ABAT/C8B/IVD/AGTR1/CTH/AMFR/NUCB1/TKFC/MET/FDX1/GRHPR/GATA6/ALDH3A2/BOK/HNMT/ERN1/ALAS1/F2/MSMO1/EVI5/MAPK14/GPHN/USO1/SEL1L/RNASE4/APLP2/DNAJB9/LSS/CPQ/MFN2/HADHB/STK38/MAGI1/CHP1/TMBIM6/NRG1/ROCK2/FUCA1/ST3GAL5/SEC62/MAGT1/GCLM/CMTM6/EIF5/ADIPOR2/PLOD1/SLC16A1/CYP51A1/ZEB1/NUDT4/DNAJA2/GOLGA1/NMT1/VCAM1/HOOK1/PSAP/…
SWEET_LUNG_CANCER_KRAS_DN	406	0.418364	2.15189	0.000260824	0.00110632	0.000523932	8160	tags=38%, list=16%, signal=32%	ACSL1/MPDZ/CES2/MYO1B/GPAM/SERPING1/ZBTB16/FMO3/CES1/C3/G0S2/CYP2C8/LEPR/RARRES2/KLF9/SORBS1/ABCA1/CFHR1/HSD11B1/PON1/FXYD1/NDRG2/TFPI/CKMT2/NID1/ALDH1A1/ACKR2/PTPRD/CDO1/PGRMC1/IL11RA/HP/STAB1/ACKR4/CADM1/SC5D/ZBTB20/FYN/LYVE1/GFRA2/PCK1/TNS2/PTPRB/AKAP12/KDR/FERMT2/ANTXR2/EPAS1/CYP2E1/ALDOB/SPTBN1/TPRG1L/ADH1C/SATB1/GREM2/TSPAN6/SEPT4/QKI/DIPK2A/PEG3/ETS2/EDNRB/LATS2/SMAD6/GPX3/ENG/CP/DUSP1/TNX…
SCHAEFFER_PROSTATE_DEVELOPMENT_48HR_UP	432	0.415039	2.15161	0.000259605	0.00110632	0.000523932	6896	tags=33%, list=14%, signal=29%	ABCA5/CLU/ERRFI1/MAF/RNF128/COBLL1/C11orf54/RDH10/GPLD1/AQP3/AFM/ACAA2/GCLC/TST/PROS1/MFSD2A/HHIP/TENM1/SMOC1/KLF15/KLF9/NT5E/BDH1/SORBS2/CAPN5/PLS3/CYP7B1/SULT1E1/SLC2A12/ARHGAP20/CLDN23/LYNX1/DHRS3/ALDH6A1/PID1/ARHGEF26/AGTR1/RAB17/EPHX2/CCDC198/CTSO/HPGD/ALDH1A1/MASP1/PCOLCE2/FDX1/ANO1/ALDH1A2/SHH/LRRC8A/MT2A/FAM149A/TMEM37/ACSM3/PLA1A/GSPT2/ERP44/BDH2/PTGR1/TMED6/SLC5A9/MAFB/DCXR/ADH1C/RNASE4…
REACTOME_CHYLOMICRON_REMODELING	10	0.861096	2.15007	0.000222321	0.00110632	0.000523932	1862	tags=80%, list=4%, signal=77%	APOE/APOA5/APOC2/APOA2/APOA1/APOB/APOC3/APOA4
PID_TNF_PATHWAY	46	0.582189	2.14983	0.000227894	0.00110632	0.000523932	9744	tags=52%, list=19%, signal=42%	CYLD/RIPK1/IKBKG/SMPD1/TNFRSF1A/MAP4K4/NRK/TNFRSF1B/MAP3K3/BIRC2/MAP3K5/MAP2K3/BAG4/RFFL/MAP3K7/MADD/RELA/BIRC3/MAP2K7/TAB1/TAB2/STAT1/TRAF1/TNFAIP3
WAMUNYOKOLI_OVARIAN_CANCER_LMP_DN	197	0.452823	2.14916	0.0002457	0.00110632	0.000523932	7975	tags=40%, list=16%, signal=34%	SDC2/MAF/PROS1/UGP2/C1S/CFL2/DPYD/SPAG9/ACSS3/ATP11C/PLSCR4/WASF3/MAGI2-AS3/ZBTB20/ADH5/CBR4/KDR/CCDC50/FERMT2/RBFOX2/PLEKHM3/KAT2B/AKAP2/EXTL2/SIRPA/KIF1B/HTRA1/CALD1/RNF146/AL162171.1/GPRASP2/TSPYL1/PDGFC/CRLS1/EPB41L5/PPM1K/AJUBA/RSRP1/ZYG11B/CRYBG3/ARNT/CERK/CPVL/ZNF330/RGL1/TTC28/GABPA/DSE/ZKSCAN8/GPNMB/PLPP1/MYH10/ZNF641/BNIP2/UBE2E2/PRNP/SOD2/NR2F1/CELF2/ST13/TMX4/GAS1/FBXO21/REC8/NLRP1/DO…
KEGG_NICOTINATE_AND_NICOTINAMIDE_METABOLISM	24	0.673429	2.14825	0.00022482	0.00110632	0.000523932	5092	tags=62%, list=10%, signal=56%	NT5E/QPRT/NNMT/AOX1/ENPP1/NADK/NT5C1B/NAMPT/NNT/NMRK1/NT5C2/CD38/NUDT12/PNP/ENPP3
MYLLYKANGAS_AMPLIFICATION_HOT_SPOT_23	19	0.711697	2.14477	0.000223514	0.00110632	0.000523932	8879	tags=58%, list=18%, signal=48%	ZBTB16/ARHGEF12/SDHD/PICALM/ATM/BIRC3/KMT2A/MEN1/PCSK7/FLI1/DDX6
REACTOME_MISCELLANEOUS_SUBSTRATES	12	0.813389	2.14474	0.000224972	0.00110632	0.000523932	2745	tags=67%, list=5%, signal=63%	CYP2D6/CYP4A22/CYP4A11/CYP3A43/CYP4F3/CYP4F11/CYP4F2/CYP2U1
THEILGAARD_NEUTROPHIL_AT_SKIN_WOUND_DN	225	0.444012	2.14402	0.000246366	0.00110632	0.000523932	9511	tags=41%, list=19%, signal=33%	TST/FOXO1/ARID4A/GNAO1/SLC23A2/HHEX/PDE3B/PHKA2/PLCG2/XPC/LILRB5/RIPK1/HDAC5/TAOK3/STK38/RBL2/CYTH1/TPST2/SLC19A1/SLC31A2/STAT6/IGF2R/TYK2/MEIS2/CRADD/NCOA4/RAF1/PHC2/GNAI2/SMARCA2/MAP3K3/GNAQ/PLCB2/MAP3K5/PPM1A/ACVR1B/LBR/JAK1/PITPNM1/GRK2/NUP153/ULK1/MBD4/KLC1/NUP214/CBFA2T3/UPF1/SRSF4/CREBBP/CALM1/MYO9B/CELF2/TOB1/PHKB/TRIM27/YY1/ARHGEF1/CDK13/RCBTB2/WAS/ADAM10/STX16/ADD3/AKT1/TBPL1/PNN/PRDX3/…
HUTTMANN_B_CLL_POOR_SURVIVAL_UP	283	0.432831	2.14401	0.000250501	0.00110632	0.000523932	8885	tags=41%, list=18%, signal=34%	IL6R/RXRA/ATF5/SERPINF1/CYP2A6/ANG/GATM/PIPOX/CTXND1/ATP11A/GALNT2/PRKCA/TLE1/THNSL1/PLPP3/NUCB1/TKFC/RIN3/ZBTB48/AKR1D1/CPT1A/DIAPH1/PDE3B/CLCN5/C4A/SH3TC1/ARL4D/MGAT4B/PSD4/RRBP1/AKAP12/HOMER2/PLD1/CDK10/LTK/RNASE4/RFNG/MAN2C1/OGFR/MYO15B/TMEM259/TPST2/RAPGEF1/NRG1/NAGLU/TRIM2/CEACAM1/IRF7/SOWAHC/MX1/ITGAL/GRN/PSD3/TNFRSF1B/ENOSF1/IFI44/PRF1/FZR1/CD38/SLC25A1/ANKRD55/FOXO3/PON2/ATL2/BLK/TM7SF2/…
ZHONG_SECRETOME_OF_LUNG_CANCER_AND_MACROPHAGE	74	0.52821	2.14364	0.000229253	0.00110632	0.000523932	5925	tags=34%, list=12%, signal=30%	COL18A1/C2/PSAT1/CLU/CFB/GOT1/IGFBP4/GOT2/SDC1/CD81/ITIH2/CREG1/TUT1/CX3CL1/CP/GSTO1/CTSB/SDC4/CTSA/VCAM1/AKR1A1/FN1/BGN/GSTM1/ENPP2
KEGG_LIMONENE_AND_PINENE_DEGRADATION	10	0.858281	2.14304	0.000222321	0.00110632	0.000523932	6939	tags=90%, list=14%, signal=78%	ALDH2/EHHADH/ALDH1B1/ECHS1/ALDH3A2/HADHA/ALDH7A1/ALDH9A1/YOD1
BIDUS_METASTASIS_DN	152	0.46799	2.14252	0.000238209	0.00110632	0.000523932	8921	tags=43%, list=18%, signal=35%	CLU/ACADS/ACACB/APOL6/TUT7/GABARAPL1/SPON2/SLC25A20/CKMT2/HP/STAB1/PTK2B/ZBTB20/AMY2B/BIN1/CPPED1/SIDT2/C3orf85/PDK2/SIRPA/ENG/REXO1/TTC17/TNFRSF1A/RASSF4/CFLAR/AKAP13/ITGAL/FRMD4A/PWWP3A/SECISBP2/RGL1/ATP8B4/KLHL2/C14orf28/NUDT6/PLEKHA2/PPFIBP1/TMEM50B/ZNF641/SIL1/ISOC2/STK11/TSPAN4/RND1/UBN2/FADS3/FAM122A/LPAR5/AHR/HEMK1/PTPN4/EP400/SEMA5A/DDX24/TOB2/DISP1/PARP10/IRF3/GSDMD/TAF3/MARCH2/EHD1/FAM…
PID_FCER1_PATHWAY	60	0.550464	2.1424	0.00022604	0.00110632	0.000523932	9394	tags=50%, list=19%, signal=41%	MAP2K1/FYN/PIK3R1/S1PR1/DUSP1/IKBKG/RAF1/NFATC2/PLA2G1B/FCGR2B/SOS1/PLPP1/LYN/PTPN11/LCP2/RELA/PAK2/AKT1/PXN/PIK3CA/HCLS1/MAP2K7/SYK/MAPK8/CBLB/PRKCB/MAP2K2/WIPF1/FCER1A/MAPK1
PID_PTP1B_PATHWAY	52	0.567039	2.1424	0.000229253	0.00110632	0.000523932	8192	tags=50%, list=16%, signal=42%	CDH2/EGFR/LEPR/INSR/FYN/SPRY2/IRS1/INS/PIK3R1/STAT5B/TYK2/CRK/STAT3/CSK/FGR/CSF1R/BLK/LYN/PTPN1/STAT5A/AKT1/PIK3CA/ITGB3/BCAR1/YBX1/JAK2
REACTOME_ROLE_OF_LAT2_NTAL_LAB_ON_CALCIUM_MOBILIZATION	70	0.533589	2.14167	0.000227739	0.00110632	0.000523932	11848	tags=56%, list=24%, signal=43%	FYN/PIK3R1/IGHV4-39/IGLV1-47/SOS1/LYN/IGLV3-1/IGKV3-20/IGHV2-70/IGKV2-28/IGLC2/IGHV3-7/PIK3CA/SYK/IGHV3-23/IGHV4-59/IGKV1-39/IGLV2-23/IGHV3-48/IGKV2-30/IGKV1-5/FCER1A/PDPK1/IGKV2D-30/IGLV1-40/IGLV1-51/IGKV1-12/IGLV2-11/IGKV4-1/IGHV3-33/IGLV2-14/IGKV1-16/IGLC3/IGLV3-19/IGHV2-5/IGKV1D-39/PIK3CB/IGKV1-17/IGHV4-34
PID_NECTIN_PATHWAY	30	0.635661	2.14105	0.000222767	0.00110632	0.000523932	8477	tags=47%, list=17%, signal=39%	CLDN1/VAV2/NECTIN3/PIK3R1/PVR/RAPGEF1/AFDN/CRK/FARP2/TLN1/PIK3CA/ITGB3/NECTIN2/CDH1
HECKER_IFNB1_TARGETS	92	0.505918	2.13961	0.000230894	0.00110632	0.000523932	8286	tags=49%, list=16%, signal=41%	CLU/SH3BGRL2/SERPING1/PROS1/CYP4F3/G0S2/ARG1/SPON2/TMEM140/SIGLEC1/HERC6/XAF1/HERC5/CD163/DHX58/LAP3/IFIT2/IFIT1/IRF7/IFIT3/IFIT5/MX1/CMPK2/IFI44/C1QC/PARP12/DTX3L/DDX58/EIF2AK2/OASL/PLSCR1/OAS2/LY6E/DDX60/RTP4/C1QB/PARP9/IFI44L/EPSTI1/GBP1/IFI35/RSAD2/SAMD9/C1QA/OAS3
REACTOME_SIGNALING_BY_CYTOSOLIC_FGFR1_FUSION_MUTANTS	18	0.721755	2.13825	0.000223664	0.00110632	0.000523932	8835	tags=72%, list=18%, signal=60%	MYO18A/PIK3R1/STAT5B/STAT3/CUX1/TRIM24/FGFR1OP/STAT5A/PIK3CA/FGFR1OP2/BCR/STAT1/CNTRL
MANALO_HYPOXIA_UP	204	0.447635	2.13794	0.000243724	0.00110632	0.000523932	9323	tags=45%, list=19%, signal=37%	COL18A1/ALDH2/CDH2/PGM1/LEPR/MTSS1/SORBS2/ABCA1/TLE1/CYP4F11/INHBE/DIAPH2/IGFBP3/INSR/GBE1/ENPP1/ANGPTL4/GRAMD1C/AK4/PTPRB/KLF11/SYNPO/PLCG2/RNASE4/TNS1/ADORA2A/SEPT4/FAM171A1/BNIP3/MTHFD2L/SMAD6/CX3CL1/HTRA1/TAPBPL/ZNF395/HLA-E/NMRK1/TNFRSF10B/GRK5/ITPR2/PPARG/PLOD1/SEC24A/MEF2A/NPR1/NYNRIN/EGLN1/ACVR1B/TNFRSF14/NOTCH4/BGN/KANK3/GPNMB/RAI14/PELI2/RBKS/ZNF710-AS1/GADD45B/CREB3L2/TENT5A/F8/CELF2/E…
DACOSTA_UV_RESPONSE_VIA_ERCC3_XPCS_DN	86	0.511511	2.13789	0.000231107	0.00110632	0.000523932	12110	tags=52%, list=24%, signal=40%	CDH2/ATRN/DST/CTIF/PCCA/NFATC3/SMAD4/MALT1/RPS6KA3/DOCK4/SP100/NECTIN3/PTEN/CENPC/TMEM131L/PDLIM5/GRK5/WWP1/MPHOSPH9/ADCY9/MYO9B/HEG1/ZEB2/CUL2/DLG1/MTAP/CDKN1B/FAM168A/SOS2/WDR37/EIF3A/HERC4/GPATCH8/AKAP10/PIK3C2A/DOCK9/RANBP2/ARAP2/FAM193A/ABCE1/SFMBT1/TOGARAM1/TSC22D2/RB1CC1/TMCC1
HELLER_HDAC_TARGETS_SILENCED_BY_METHYLATION_DN	279	0.432042	2.13756	0.000249439	0.00110632	0.000523932	9881	tags=43%, list=20%, signal=34%	SNTB1/CBS/IL6R/PSAT1/MAF/ATF5/SYNE3/FNDC3A/SLC47A1/DST/GAS2/GADD45A/INHBE/TNFRSF10D/KLHL21/ST3GAL6/NFE2L1/CADM1/FAM149A/IFNAR2/PDE3B/SDC1/ST6GAL1/ST7/IQGAP2/SLC25A15/SUCLG2/JMJD1C/SHMT2/TSHR/NR3C1/HERPUD1/DNAJB9/DCPS/DEPTOR/TAPBPL/LONP1/STAT6/GSTO1/MYCL/TXNDC5/PLCL2/BLNK/CEACAM1/HSP90B1/GSDMB/FAS/EIF5/CCDC69/NFIC/HGF/CFLAR/EHD3/TPP1/FGFR3/IRF8/IFRD1/MYOM2/WNT5B/TLK1/TNFRSF14/PITPNC1/ITGB7/ECPAS/U…
SOTIRIOU_BREAST_CANCER_GRADE_1_VS_3_DN	53	0.562194	2.1344	0.000228102	0.00110632	0.000523932	7011	tags=42%, list=14%, signal=36%	ECHDC2/ARHGEF12/ARHGEF40/CRY2/RNASE4/AASS/STAT5B/PIGV/ZNF395/MARCH8/CTDSP1/NBR1/SMARCA2/NYNRIN/MPHOSPH8/TBC1D17/WDR19/SNX1/STARD13/AKAP11/IFT88/DIXDC1
REACTOME_GLYCEROPHOSPHOLIPID_BIOSYNTHESIS	123	0.480988	2.13433	0.000234797	0.00110632	0.000523932	7743	tags=39%, list=15%, signal=33%	PNPLA3/LPCAT3/GPAM/GPD1/TMEM86B/MFSD2A/DGAT2/BCHE/PLA2G2A/LPIN2/AGPAT3/PCYT2/PEMT/ETNPPL/MGLL/PLA1A/PITPNM2/PCTP/AGPAT2/PLD1/PLA2G15/CSNK2A2/CHKA/HADHA/HADHB/PNPLA8/CHPT1/ETNK2/CRLS1/SLC44A1/PNPLA2/LPIN1/PLD3/GPAT3/PLA2G1B/LPIN3/PITPNM1/DGAT1/PITPNB/MIGA2/PLD6/PHOSPHO1/ETNK1/ACP6/STARD10/CEPT1/SELENOI/CDIPT
GRAESSMANN_RESPONSE_TO_MC_AND_SERUM_DEPRIVATION_UP	214	0.444697	2.1325	0.000245399	0.00110632	0.000523932	9585	tags=44%, list=19%, signal=36%	GHR/METTL7A/MOCS1/C3/N4BP2L1/UROC1/CYP2C8/CFB/FES/HSD11B1/NNMT/IHH/NECAB2/TMEM140/DLC1/CCL23/SELENOP/TRIM25/KNG1/CPEB3/IRS1/PHLDB2/HIPK2/APOL2/HELZ2/NACC2/TSPAN33/CP/RESF1/EBNA1BP2/IFIT2/FAS/IRF2/IRF7/IFIH1/IFIT3/SYCP3/MX1/CMPK2/LIFR/UBA7/PARP14/IFI44/PRF1/SFXN2/PARP12/COL5A3/DPF3/KALRN/DCUN1D1/TAP2/BGN/EIF2AK2/LIPA/IRF9/SEPT6/OXA1L/GSTM1/OAS2/SLC9A8/SP110/SOD2/DDX60/MIGA2/TXNIP/RBM43/RTP4/PARP9/…
REACTOME_NICOTINATE_METABOLISM	31	0.628642	2.13148	0.000224618	0.00110632	0.000523932	8334	tags=65%, list=17%, signal=54%	CYP8B1/NADK2/NT5E/QPRT/NAPRT/NNMT/PARP4/NADK/NAMPT/NMRK1/NAXD/PARP14/CD38/NUDT12/PTGIS/PARP9/RNLS/PARP16/PARP8/PARP10
BERENJENO_TRANSFORMED_BY_RHOA_FOREVER_UP	20	0.699173	2.1311	0.000225124	0.00110632	0.000523932	2227	tags=45%, list=4%, signal=43%	TMEM176B/HSD17B11/GADD45A/TMEM176A/ALDH1A1/CDO1/IL11RA/GBE1/NGEF
TERAO_AOX4_TARGETS_HG_UP	27	0.650374	2.12993	0.00022604	0.00110632	0.000523932	12352	tags=67%, list=25%, signal=50%	CEBPA/CYP2C8/MIA2/CYTH1/RNF185/TXNDC5/RAF1/PEX5/MFSD9/TTC7A/MAP1LC3A/TMEM127/SGPL1/TRAPPC10/NAA60/GNS/PAM/SBF2
LANDIS_ERBB2_BREAST_TUMORS_65_DN	39	0.59719	2.12756	0.00022941	0.00110632	0.000523932	4072	tags=46%, list=8%, signal=42%	ACAA1/GPAM/ACAA2/PHYH/PGM1/CPT2/ALDH1A1/PDE8A/CHCHD10/BCKDHB/APLP2/GPX3/CHPT1/HTRA1/HADH/ADIPOR2/SOWAHC/NRP1
TORCHIA_TARGETS_OF_EWSR1_FLI1_FUSION_UP	262	0.43334	2.1275	0.000250063	0.00110632	0.000523932	5839	tags=32%, list=12%, signal=28%	MST1/ALDH5A1/SLC43A1/APOE/TMPRSS6/GDA/PON3/FUOM/SHANK3/PC/HMGCS2/NDRG2/ACAT1/DIAPH1/PLSCR4/ACADSB/CDA/IL18R1/ARL4D/APOA1/DUSP10/GSPT2/HSD3B7/DCXR/IFFO1/CD5L/SLC45A3/UNC5CL/DENND2C/IQCJ-SCHIP1/WDR7/PYGL/GRAMD2B/TRIM26/RBL2/GPX2/PLEK2/OPTN/PDLIM5/GRTP1/TOM1L1/PAFAH2/NAGLU/GRK5/NFIC/TRIM10/KDM7A/DIP2C/MAVS/ARSA/PBX3/GRN/FRMD4A/RSPRY1/ATXN7L1/RGL1/PRXL2A/FAM102A/ID2/VCAM1/ACVR1B/EPS8/ITGB7/YPEL2/PITP…
REACTOME_SIGNALING_BY_SCF_KIT	43	0.583228	2.12621	0.000227428	0.00110632	0.000523932	8694	tags=44%, list=17%, signal=37%	FES/PRKCA/TEC/FYN/PIK3R1/STAT5B/SH2B3/GRB10/STAT3/PTPRU/SOS1/LYN/PTPN11/GRAP/STAT5A/PIK3CA/PTPN6/JAK2/STAT1
PID_IL2_1PATHWAY	55	0.556161	2.12592	0.000228624	0.00110632	0.000523932	9394	tags=49%, list=19%, signal=40%	MAP2K1/PTK2B/FYN/IRS1/MAPK14/PIK3R1/STAT5B/IRS2/RAF1/STAT3/SOCS2/JAK1/SOS1/PRKCE/IL2RB/PTPN11/DOK2/CISH/STAT5A/PIK3CA/SYK/MAPK8/PPP2R5D/STAT1/PRKCB/MAP2K2/MAPK1
MARTENS_BOUND_BY_PML_RARA_FUSION	448	0.408953	2.12587	0.000260824	0.00110632	0.000523932	10507	tags=40%, list=21%, signal=32%	ACSL1/MLXIPL/WDR81/UPB1/ALDH2/H6PD/ZBTB16/ABHD2/SCARB1/ST3GAL2/CDH23/RAB43/IDH1/DCAF11/GBE1/SH3PXD2A/IFNAR2/TK2/MGLL/FCGRT/PIK3AP1/IQSEC1/PITPNM2/GFOD1/ACSF3/NADK/KLF13/PLCG2/MAFB/SPTBN1/AUH/APLP2/ADCY10/SIRPA/SPHK2/PTEN/LATS2/SH3BP2/AKNA/ZFYVE28/ZDHHC19/RAPGEF1/PGPEP1/FRAT1/NEK6/SPG7/MBP/FNBP1/ID1/PAFAH2/TYK2/RAB37/SKI/TNFRSF10B/NBR1/PLAC8/GRK5/LRRC20/ARAP1/ECE1/APBB1IP/ITPR2/ABI3/IRF8/WNT5B/PLC…
REACTOME_AFLATOXIN_ACTIVATION_AND_DETOXIFICATION	19	0.705272	2.1254	0.000223514	0.00110632	0.000523932	4483	tags=53%, list=9%, signal=48%	CYP3A5/AKR7L/CYP1A2/CYP3A4/ACY1/AKR7A3/ACY3/MGST1/DPEP2/MGST2
BLUM_RESPONSE_TO_SALIRASIB_UP	243	0.43622	2.12533	0.000248509	0.00110632	0.000523932	10678	tags=41%, list=21%, signal=33%	CBS/PSAT1/ATF5/LRP1/GADD45A/CTH/GOT1/ESRRA/P4HB/SEPHS2/HMGCL/MGAT1/KLF11/INPP1/XPC/SHMT2/SEC63/SEL1L/RIOK3/ECH1/DNAJB9/NDEL1/CTSL/BACH1/FST/PHGDH/NAMPT/ELL2/TMBIM6/GLG1/TOM1L1/TNFRSF10B/HSP90B1/ZPR1/EIF5/SLC33A1/GOLGA4/IFRD1/TOM1/BIRC2/NIT1/ERP29/AARS/FOXO3/ACVR1/ATF6/CHIC2/CEBPG/SUPV3L1/ADPRM/CLASRP/EEF2/TIMM44/GALE/SKIV2L/RELA/CDK13/MTIF2/BTG1/USP25/GOLGA5/DCTD/UBE2H/RAD23A/POLI/RNF13/MAPK6/SUR…
ZHANG_TARGETS_OF_EWSR1_FLI1_FUSION	87	0.507114	2.12452	0.000230521	0.00110632	0.000523932	6442	tags=37%, list=13%, signal=32%	ATF5/CES1/SORD/DAPK1/G0S2/IL1RAP/GABARAPL1/KYAT1/IGFBP4/FCGRT/ST6GAL1/KDSR/AK4/GYG2/SIRPA/SH2B3/STAT6/GLG1/FNBP1/HLA-E/TRIM2/GRK5/MAN2A2/CHN2/ID2/JAK1/CEBPB/CAV2/DPYSL2/ARHGEF1/CD99/STARD13
GENTILE_UV_LOW_DOSE_DN	64	0.538919	2.12439	0.000227324	0.00110632	0.000523932	8218	tags=44%, list=16%, signal=37%	EHBP1/CDH2/SAMD4A/GBE1/PEX14/SATB2/RFTN1/PTPRK/FNBP1/MEIS2/CRADD/TPST1/CXCL12/EXT1/COL6A1/CEMIP/UBL3/SIPA1L1/MARF1/PHKB/UTRN/STX12/PIBF1/SLC20A2/RBMS1/SEMA5A/MICAL2/DYNC1LI2
GAUSSMANN_MLL_AF4_FUSION_TARGETS_F_UP	179	0.453456	2.12206	0.000244798	0.00110632	0.000523932	7529	tags=37%, list=15%, signal=31%	ECHDC2/LMO7/SLC7A2/EGFR/TMEM176B/NT5E/ADGRG6/TMEM176A/CSAD/DYSF/CDA/BMPER/ADAMTSL4/FCGRT/SELENOP/MME/ECM1/PCTP/SYNPO/PLCG2/DECR1/SDF4/FST/TMEM30A/CX3CL1/C1QTNF1/CNP/KIAA1671/PCNX1/IL4R/ARSB/TEK/CARD10/ST3GAL5/IFIH1/PREX2/KDM7A/RSRP1/LIFR/ZFAND5/IFI44/COL6A1/ATP8B4/CLMN/NCKAP5/L3HYPDH/TMEM154/SPPL2A/NFKBIZ/CAST/GJB3/GSTM1/PLSCR1/LY6E/CEBPD/GAS1/GAS6/RCBTB2/ABLIM1/PLEKHA6/RBM26/COL6A2/ADAMTS2/PNRC1…
ZHU_CMV_ALL_DN	119	0.481157	2.12157	0.000235183	0.00110632	0.000523932	7701	tags=39%, list=15%, signal=33%	ANPEP/IGF2/APOE/MBL2/ACO1/C1R/F7/CFHR1/SULT1E1/IGFBP3/TRAM2/AKR1C1/HNMT/HSD17B2/MYLK/MAPK14/XPC/ERCC5/ADH1B/NR3C1/CRHBP/ENG/ITSN1/TCF7L2/TMEM198B/TNFRSF1A/ABL1/NFIC/FTL/CXCL12/AR/ID2/ZCCHC9/AARS/IL6ST/TENT5A/ACVR2A/CEBPD/GAS1/PTGIS/IGFBP2/AHR/COL6A2/PDGFRA/MARCKS/RBMS1
CERVERA_SDHB_TARGETS_1_DN	35	0.608165	2.12151	0.000226091	0.00110632	0.000523932	4511	tags=43%, list=9%, signal=39%	ANGPTL3/FTCD/ZBTB16/A1BG/SLC39A5/SULT2A1/ADH6/HMGCS2/CPS1/F2/ALDOC/PEG3/PLA2G7/ITPR2/AFP
CHIARETTI_ACUTE_LYMPHOBLASTIC_LEUKEMIA_ZAP70	67	0.532452	2.12083	0.000227894	0.00110632	0.000523932	10121	tags=51%, list=20%, signal=41%	HPN/CKMT2/ITGA5/XPC/EPM2AIP1/BAIAP2/CRADD/AGPS/PHC2/PBX3/TNFRSF1B/RETREG3/SEMA6A/FGR/TRIP6/ACVR2A/IL32/CDK9/ATM/AP3D1/GAB1/JCHAIN/CTNND1/HPS1/TTN/ITFG2/SF3B3/CASP10/PCSK7/CCN2/PTPN18/KMT2B/KLRB1/ZAP70
REACTOME_FCGR_ACTIVATION	68	0.531909	2.12017	0.00022899	0.00110632	0.000523932	11848	tags=54%, list=24%, signal=42%	FYN/IGHV4-39/IGLV1-47/FGR/IGHG1/LYN/IGLV3-1/IGKV3-20/IGHV2-70/IGKV2-28/IGLC2/IGHV3-7/SYK/IGHV3-23/IGHV4-59/IGHG2/IGKV1-39/IGLV2-23/IGHV3-48/IGKV2-30/IGKV1-5/IGKV2D-30/IGLV1-40/IGLV1-51/IGKV1-12/IGLV2-11/IGKV4-1/IGHV3-33/IGLV2-14/IGKV1-16/IGLC3/IGLV3-19/HCK/IGHV2-5/IGKV1D-39/IGKV1-17/IGHV4-34
KEGG_ADHERENS_JUNCTION	73	0.523847	2.11988	0.00022899	0.00110632	0.000523932	8477	tags=44%, list=17%, signal=37%	LMO7/EGFR/SORBS1/MET/INSR/CTNNA3/WASF3/FYN/PTPRB/SMAD4/NECTIN3/CSNK2A2/PARD3/BAIAP2/TCF7L2/AFDN/TGFBR2/WASF1/FARP2/MAP3K7/TJP1/CREBBP/PTPN1/CTNND1/WAS/NLK/WASL/NECTIN2/EP300/PTPN6/SNAI2/CDH1
HAN_SATB1_TARGETS_UP	423	0.409842	2.11947	0.000259808	0.00110632	0.000523932	8734	tags=36%, list=17%, signal=30%	SDC2/SLC17A9/DIO1/ACAA1/TTC38/TTPAL/ATRN/CLDN1/TST/SLCO1B3/ASL/ADGRG6/ECHDC1/BCHE/INHBE/SEC14L2/PLPP3/C19orf66/APOC1/ATP13A3/SORL1/ST3GAL6/NNMT/SLC30A1/ZCCHC24/DENND5B/CTSZ/WASF3/IFNAR1/IL18R1/PRKAG2/MEGF9/FYN/AK4/PPP6R2/DENND4A/C4orf19/TPCN2/F2RL2/MSMO1/FZD4/TXNRD2/PDE8A/APOL2/EPAS1/STXBP6/SPTBN1/GGCX/TNS1/ALDOC/EPM2AIP1/CXADR/QKI/DNAJB9/LSS/NACC2/AIFM2/SLC1A1/IL13RA2/FST/CEMIP2/BNIP3/GRAMD2B/IN…
ROETH_TERT_TARGETS_UP	14	0.768901	2.11784	0.000224316	0.00110632	0.000523932	7929	tags=71%, list=16%, signal=60%	HERC6/HERC5/IFIT1/IFIT3/MX1/IFI44/OASL/HEG1/IFI44L/RSAD2
DAVICIONI_MOLECULAR_ARMS_VS_ERMS_UP	338	0.418465	2.11748	0.000250752	0.00110632	0.000523932	6646	tags=31%, list=13%, signal=27%	COL18A1/LIPG/POR/SLC46A3/ASS1/PCSK6/ACO1/DAPK1/PIPOX/FOXO1/ZCCHC14/DST/KANK1/GNE/GADD45A/ABAT/MMUT/TIAF1/ELMO1/SAMD4A/CDC14B/TRPV1/PTPRD/MET/ECHS1/GOT2/MTMR4/DIPK1A/SMPDL3A/FLVCR2/MEGF9/CLCN5/PEBP1/ERP44/MYO1E/MAN1C1/QDPR/SUN2/SPATS2L/DNMBP/RAPGEF4/ADK/BLCAP/ELOVL2/GABPB1-IT1/ANKS1A/PEG3/SATB2/MSRB1/HDAC5/KIF1B/TMEM131L/S1PR1/NRTN/COBL/TMEM47/FGFR4/NNT/ENO3/UBR2/B3GAT1/TOM1L1/NMRK1/IL4R/RRAGD/RAS…
ZHOU_INFLAMMATORY_RESPONSE_FIMA_DN	277	0.428359	2.1168	0.000250941	0.00110632	0.000523932	8172	tags=37%, list=16%, signal=31%	NHSL1/MAF/MLYCD/ACACB/GPAM/CLPX/SHPK/ECM2/CEBPA/FGD4/NDRG2/CPS1/ARHGEF40/ARID4A/TSHZ1/RIN3/TENT4B/ACKR4/NFATC3/HHEX/SDC1/SPRY2/GFOD1/DBT/JMJD1C/XPC/IFFO1/AVPI1/SLC25A30/TNFAIP8L1/NINL/ORAI3/PRPSAP1/ZNF395/MBP/LDLRAP1/AQP11/USP30/WDR91/ENHO/INTS10/EPB41/AJUBA/SIAE/ACTL6B/EHD3/MBLAC2/SETDB2/FRMD4A/PWWP3A/GLT8D1/CACNB2/NUDT12/FASTKD1/TMEM177/DPF3/CRBN/CHD9/ZC3H14/PRMT9/VSIR/SNX18/NR2F6/RNF166/MYH10/…
ROSS_AML_WITH_PML_RARA_FUSION	80	0.513041	2.11589	0.000229568	0.00110632	0.000523932	7456	tags=40%, list=15%, signal=34%	MST1P2/MST1/SERPING1/AQP3/MARC2/TLE1/ST3GAL6/P4HB/STAB1/PDE3B/LTK/ATG13/CALR/MEG3/GRB10/HSPA5/CHN2/ITPR2/GALNS/HGF/PGBD5/AGAP4/ALCAM/CLMN/ANKFY1/SEC31A/SLC25A38/TMX4/FNDC3B/IGFBP2/CERS4/ARHGAP4
ZAMORA_NOS2_TARGETS_DN	78	0.515875	2.11498	0.000229463	0.00110632	0.000523932	3935	tags=33%, list=8%, signal=31%	SERPING1/F12/SORD/SLC6A13/HPN/FDX1/HP/CTSZ/IFNAR2/GALK1/CD81/SERPINC1/APOB/MGAT1/FABP1/MAN2A1/FZD4/CYP7A1/RIPK1/PRPSAP1/CP/LONP1/PDIA4/GCLM/FTL/STAT3
REACTOME_HDL_REMODELING	10	0.846707	2.11414	0.000222321	0.00110632	0.000523932	2158	tags=70%, list=4%, signal=67%	LCAT/LIPG/APOE/APOC2/APOA1/APOC3/ALB
SWEET_LUNG_CANCER_KRAS_UP	463	0.405452	2.11368	0.000262123	0.00110632	0.000523932	6531	tags=30%, list=13%, signal=26%	COL18A1/ACSL5/PSAT1/CLU/GCH1/ERRFI1/SHMT1/C5/LPCAT3/VIL1/CEBPA/GJB2/LBP/F10/ARG1/MIA2/F7/RIDA/FMR1/CD14/ACADL/MAN1A1/HPN/GNE/ATP11A/GADD45A/ORM1/CPOX/PLIN2/LRG1/APOC1/IGFBP3/GRHPR/CCL23/MT2A/CTSZ/NUP88/SDC1/ITIH4/CLCN5/ST6GAL1/RBP4/ST7/MARCO/CES3/REEP6/RRBP1/KNG1/PTGR1/TMEM56/CCL15/CNDP2/SLC31A1/ZFP1/AVPI1/GGCX/TGOLN2/ALDOC/PCYOX1/AASS/SIRPA/IL13RA2/KLHDC2/HIBADH/TAOK3/TMEM30A/EDEM1/CYB5R3/ELL2/S…
PECE_MAMMARY_STEM_CELL_DN	140	0.466037	2.11336	0.000235571	0.00110632	0.000523932	10218	tags=49%, list=20%, signal=39%	KLF12/SLC41A2/GLUD1/CTSO/NID1/P4HB/CTSZ/WASF3/JMJD1C/SEC63/AKAP2/STX2/GOLGA8A/CALD1/ZKSCAN1/RNF146/TCF7L2/KDM7A/PNISR/CDC5L/C9orf64/SNED1/BTBD19/VCAM1/TICAM2/COL6A1/TNRC6A/ZCCHC9/NBPF14/ANKH/BGN/DENND4C/UBL3/PCM1/EPS15/CNEP1R1/RPP14/CCNL1/TM9SF2/CALM1/TXNIP/TRIM27/SLC30A7/SCAF4/FHL1/NKTR/DCTD/GNG2/KLHL28/NEMF/FGFR1OP2/NASP/PUM2/NCBP3/CUL3/ZBTB1/SLC25A43/ATRX/TMEM230/NEAT1/CDC16/UVSSA/SEC22B/PANK3…
TIEN_INTESTINE_PROBIOTICS_2HR_DN	89	0.502301	2.11288	0.000230681	0.00110632	0.000523932	9138	tags=42%, list=18%, signal=34%	CLU/ALDH5A1/GABARAPL1/RAPGEF2/FUBP3/CADM1/FERMT2/JMJD1C/QKI/CLCN4/CALD1/RESF1/TCAF1/MAP4K4/AC026470.1/RAF1/ZNF512B/GGH/OPA1/RDH11/SOS1/KLC1/UBE3B/PICALM/CEBPD/FNDC3B/LRPPRC/HIC2/ETNK1/LARS2/KLHL7/PRCP/MICAL2/ERCC3/NCK1/UFM1/TNS3
BIOCARTA_FIBRINOLYSIS_PATHWAY	12	0.800873	2.11174	0.000224972	0.00110632	0.000523932	1784	tags=50%, list=4%, signal=48%	FGG/FGA/FGB/CPB2/F2/PLG
REACTOME_METALLOTHIONEINS_BIND_METALS	10	0.845465	2.11104	0.000222321	0.00110632	0.000523932	4295	tags=90%, list=9%, signal=82%	MT1X/MT1H/MT1E/MT1M/MT1F/MT2A/MT1G/MT1A/MT1B
LAIHO_COLORECTAL_CANCER_SERRATED_DN	86	0.504865	2.11011	0.000231107	0.00110632	0.000523932	11847	tags=51%, list=24%, signal=39%	ECHDC2/FMR1/ATP7B/GFOD1/ETS2/LRP6/ALDH7A1/SPOP/PCMTD2/PHF8/MPHOSPH8/ACVR1B/ERBB3/PEX5/AKAP17A/REPIN1/KATNB1/ZNF767P/PHKB/ENGASE/GRINA/SCAF4/STX16/KHSRP/ZNF652/PTCH1/INPP5D/ZNF518A/ADD1/PROSER1/NPIPB3/ZNRD1ASP/CDK5RAP3/CPNE1/OGT/PABPN1/F8A1/CLCN7/ZFP36L1/HUWE1/BRD1/NPIPA1/SRRM2/SFPQ
MARIADASON_REGULATED_BY_HISTONE_ACETYLATION_DN	39	0.592271	2.11004	0.00022941	0.00110632	0.000523932	10838	tags=62%, list=22%, signal=48%	KANK1/MET/NRAP/PAIP2B/FGFR4/OTUD4/GABPA/USF2/CERS2/GAS6/SCCPDH/INPP5D/OGDH/DCT/MTR/ZNF449/MTCH2/LUC7L2/INO80D/RNF138/MPDU1/RBAK/FAM193A/BDP1
REACTOME_CALNEXIN_CALRETICULIN_CYCLE	26	0.649358	2.10995	0.000225124	0.00110632	0.000523932	8994	tags=54%, list=18%, signal=44%	AMFR/SEL1L/CALR/EDEM1/OS9/RNF185/SYVN1/GANAB/PRKCSH/RNF103/MAN1B1/UGGT1/EDEM2/RNF5
HEDENFALK_BREAST_CANCER_BRACX_DN	20	0.692227	2.10993	0.000225124	0.00110632	0.000523932	8721	tags=70%, list=17%, signal=58%	FTCD/EVI5/AFDN/ARHGEF7/METAP2/HPS5/SRSF11/BANP/CEPT1/EP300/OCIAD1/FKBP8/SVIL/EHD1
BIOCARTA_PPARA_PATHWAY	52	0.558165	2.10887	0.000229253	0.00110632	0.000523932	7635	tags=42%, list=15%, signal=36%	RXRA/EHHADH/PPARA/NR0B2/NR1H3/PRKCA/ACOX1/HSD17B4/APOA2/APOA1/FABP1/PPARGC1A/PIK3R1/STAT5B/DUSP1/NCOR1/CREBBP/RELA/STAT5A/PIK3CA/PRKAR1B/EP300
KASLER_HDAC7_TARGETS_1_UP	187	0.446929	2.10876	0.000243013	0.00110632	0.000523932	9216	tags=37%, list=18%, signal=31%	CAPN3/STEAP3/C5/PGLYRP2/GPR146/MTSS1/TEC/AP1M1/TMEM37/AKAP1/DUSP10/AHSG/AKAP12/SMAP2/FGD2/DDX19B/MACO1/HDAC5/CEMIP2/LATS2/RFTN1/TRIM35/ENO3/CTU2/CNNM3/ST3GAL5/P2RX7/GPN2/SYVN1/NPL/POLDIP2/PBX3/UBXN6/STAT3/CYFIP2/MRPS2/ERP29/CYP20A1/CLPTM1/PIK3CD/CAPN7/ASB6/NCOA2/PEX6/MUL1/USP19/TMUB1/BCL6/ASB8/STAT5A/SBF1/SHISA5/ITGB3/SLCO3A1/ATP2A2/UGCG/RHOBTB2/VARS/NHEJ1/C2CD2L/CHST2/TMEM273/B4GALT1/PCYT1A/IKZF…
REACTOME_TOLL_LIKE_RECEPTOR_9_TLR9_CASCADE	95	0.49521	2.10487	0.00023175	0.00110632	0.000523932	9448	tags=48%, list=19%, signal=39%	MAP2K1/PPP2R1B/CD14/IRAK2/MAPK14/RPS6KA3/NKIRAS1/IKBKG/SAA1/IRF7/PIK3R4/MEF2A/CUL1/PIK3C3/TICAM2/MAP2K3/MYD88/TLR4/EEA1/TICAM1/ECSIT/PELI2/MAP3K7/NKIRAS2/RBSN/DUSP6/IRAK4/DUSP3/RELA/AGER/PPP2CB/MAP2K7/TAB1/TAB2/RPS6KA2/MAPK8/MAP2K6/MEF2C/NFKBIB/PELI1/TAB3/PPP2R5D/ATF2/VRK3/MAPK1/ELK1
KUMAR_TARGETS_OF_MLL_AF9_FUSION	401	0.409046	2.1042	0.000257069	0.00110632	0.000523932	8453	tags=34%, list=17%, signal=28%	CYP2D6/ACADS/AQP9/CLDN1/ANG/C1R/GOLIM4/PGM1/F10/ENPEP/PLS3/CIDEB/CYP7B1/GAS2/PRKCA/SMO/IGF1/ARNTL/HPGD/FBP1/CDIP1/IDH1/ZDHHC14/VNN3/PAN2/MOCOS/ST6GAL1/FYN/IGHM/KIAA2013/F2RL2/EPHX1/CHCHD10/GUCD1/SLC31A1/SATB1/CD5L/SHD/PGRMC2/CMBL/ZFPM1/TMEM30A/GPX3/ELL2/ALDH7A1/LHPP/SPIC/BCKDHA/ITSN1/GLG1/GSTO1/FAM76B/IFIT2/BLNK/NAGLU/CEACAM1/CDH5/PCCB/PLA2G7/IL1RN/IFIT3/CYP11A1/CTSB/SPATA13/SDC4/SLAIN1/CMPK2/DNA…
MOOTHA_PGC	419	0.407038	2.10401	0.000259202	0.00110632	0.000523932	11351	tags=43%, list=23%, signal=34%	GCH1/ACADS/SHMT1/MAP2K1/PDK4/ACADM/PHYH/LRP5/PGM1/NR0B2/ACADL/GABARAPL1/NDRG2/AGPAT3/SLC25A20/PCYT2/CKMT2/AMACR/ESRRA/PTPRD/FDX1/ACOT13/CPT1A/MT2A/ETFB/SDHA/AKAP1/ALAS1/PCK1/F2RL2/GCDH/FZD4/CHRNE/PCOLCE/SLC31A1/AVPI1/GK/DNAJB9/MSRB1/HADHB/BAG6/AIFM1/CX3CL1/LMBRD1/DUSP1/SAT1/LONP1/CHP1/GSTO1/CRAT/SMPD1/VIPR1/HSPA5/DDT/ITPR2/RXRB/ZNF33B/TCN2/DHX16/POLDIP2/ABCA2/RAMP3/IFRD1/EGLN1/LPIN1/ZFAND5/LRRFIP…
BIOCARTA_CXCR4_PATHWAY	19	0.697208	2.1011	0.000223514	0.00110632	0.000523932	9394	tags=74%, list=19%, signal=60%	MAP2K1/PIK3C2G/PRKCA/PTK2B/PIK3R1/RAF1/CRK/CXCL12/GNAQ/RELA/PIK3CA/BCAR1/PRKCB/MAPK1
BOGNI_TREATMENT_RELATED_MYELOID_LEUKEMIA_DN	33	0.610652	2.10071	0.00022482	0.00110632	0.000523932	10934	tags=58%, list=22%, signal=45%	CDH2/ACOX1/NR2C1/TNFRSF10B/SEC62/RXRB/SEC24A/CCNG1/VPS52/PREP/FBXO21/TBC1D5/NKTR/BTN3A3/PPT2/SRSF6/CD2AP/IGLV2-14/ZFYVE26
MORI_EMU_MYC_LYMPHOMA_BY_ONSET_TIME_DN	18	0.709067	2.10066	0.000223664	0.00110632	0.000523932	5795	tags=61%, list=12%, signal=54%	SURF4/PVR/CBX7/HSP90B1/HSPA5/NFKBIZ/IL6ST/VSIR/SP110/GAA/CREB3L2
FLECHNER_PBL_KIDNEY_TRANSPLANT_OK_VS_DONOR_DN	42	0.579179	2.09926	0.000227169	0.00110632	0.000523932	9475	tags=52%, list=19%, signal=43%	IMPA1/AMFR/RHEBP1/MAPK14/ETFA/ITSN2/ABL1/PYROXD1/UBE2E3/MKNK1/MIR22HG/LYN/GADD45B/IGKC/TENT4A/AHR/EID1/FLI1/BCLAF1/CDC42EP3/PPP1R10/ARFGAP3
GHANDHI_BYSTANDER_IRRADIATION_UP	83	0.505707	2.09901	0.000231054	0.00110632	0.000523932	4730	tags=33%, list=9%, signal=30%	GCH1/RNF128/SLC39A14/CXCL2/MT1X/G0S2/MT1H/EPB41L4B/TUT7/MT1E/HSD11B1/ZC3H12C/KYNU/MT1G/NAMPTP1/C9orf72/IL13RA2/NAMPT/SAT1/PLEK2/SLC39A8/GCLM/PPP4R3B/IL33/ZSWIM8/MT1B/NFKBIZ
GARGALOVIC_RESPONSE_TO_OXIDIZED_PHOSPHOLIPIDS_BLUE_DN	62	0.534223	2.09714	0.000225581	0.00110632	0.000523932	7362	tags=40%, list=15%, signal=34%	GPAM/PALMD/ATOH8/AMACR/ACBD4/NAPEPLD/GATA6/GATA6-AS1/GSPT2/AKNA/KCNH7/FAN1/MBLAC2/TNFRSF1B/RALGPS2/SOX7/SUOX/DNAAF2/TMEM50B/BMP2K/CSTF2T/RBM43/MEIS1/HTT/PINX1
REACTOME_BMAL1:CLOCK_NPAS2_ACTIVATES_CIRCADIAN_GENE_EXPRESSION	27	0.64033	2.09704	0.00022604	0.00110632	0.000523932	9591	tags=56%, list=19%, signal=45%	RXRA/PPARA/KLF15/F7/ARNTL/HELZ2/NAMPT/CHD9/CREBBP/NCOA2/TBL1X/NPAS2/CARM1/CLOCK/DBP
SENGUPTA_EBNA1_ANTICORRELATED	154	0.456954	2.09635	0.000239464	0.00110632	0.000523932	8782	tags=39%, list=17%, signal=32%	WDR81/HPX/H6PD/ABHD15/MSRA/VAV2/C19orf66/LIMS2/TNFSF14/ZDHHC14/WDTC1/SIGLEC7/SIDT2/SUN2/FGD2/CYLD/FITM1/EML3/USP30-AS1/TSPAN33/ZFYVE28/R3HDM2/CES4A/RAPGEF1/SPG7/PLEKHF1/PHYKPL/NUTM2F/WBP1L/GALNS/TP53I13/CYFIP2/MAP2K3/LIMD1/SYT9/FAM13A-AS1/SAP25/GADD45B/SLC25A28/CAMTA2/CISH/ARHGEF1/FAM107A/GDPD5/AC139768.1/HLA-A/ARHGAP4/KCNAB2/FUT5/NLRC5/SMPD3/PPP1R9B/MTMR9LP/EFTUD2/CTNS/NAPSA/PLEKHM1/NPIPB15/MARC…
REACTOME_RESPONSE_TO_METAL_IONS	13	0.776874	2.09436	0.000224568	0.00110632	0.000523932	1818	tags=62%, list=4%, signal=59%	MT1X/MT1H/MT1E/MT1M/MT1F/MT2A/MT1G/MT1A
WALLACE_PROSTATE_CANCER_RACE_UP	301	0.419589	2.09325	0.000250564	0.00110632	0.000523932	10249	tags=41%, list=20%, signal=32%	CROCCP2/ANPEP/CLU/APOE/CDH2/PDK4/APOL1/APOL6/HS3ST3A1/ECHDC3/HMGCS2/AMFR/NID1/DLC1/DNASE1L3/STOM/FYN/IGHM/PEX14/HERC6/PPARGC1A/XAF1/HERC5/ELOVL2/ETS2/TLE4/CPM/IRS2/OPTN/HLA-E/PLAC8/IFIT1/STAG3/SELE/CTSS/IFIT3/CLDN5/MX1/RAMP3/ITGAL/IRF8/IGKV1D-13/ERAP1/IFI44/MRC1/PRF1/IL10RA/PARP12/GIMAP6/FCGR2B/TAP2/IGHG1/SOS1/BTN3A2/IRF9/PDHA1/SEPT6/OAS2/FYB1/NFIL3/IL1R2/IGKC/IFITM3/DDX60/CELF2/BTN3A1/CEBPD/TMX4…
ROZANOV_MMP14_TARGETS_UP	257	0.426459	2.09151	0.000248016	0.00110632	0.000523932	7320	tags=32%, list=15%, signal=28%	COL18A1/BACE1/TDO2/ECHDC2/ERRFI1/HSD17B6/ATF7IP2/HHIP/N4BP2L1/GJB2/DAPK1/LRP5/FOXN3/PALM2-AKAP2/NR1H3/HSD11B1/CGNL1/QPRT/IL1R1/NNMT/ENPP1/MOCOS/ST6GAL1/SERPINA5/PPP6R2/PSD4/PTGR1/MYLK/RBFOX2/DNAJC22/PCOLCE/NR3C1/ALDOC/ADORA2A/HERPUD1/SIRPA/FST/KIF1B/STK38/TPST2/CALD1/DEPTOR/LHPP/PNPLA7/NNT/CEND1/ARRDC4/PLAC8/CRLS1/FUCA1/SOBP/PPARG/MX1/LGMN/ALPK2/MYRF/COL6A1/TRPV4/APMAP/SLC12A7/N4BP2L2/FN1/APOL3/S…
BYSTROEM_CORRELATED_WITH_IL5_DN	57	0.543809	2.0914	0.00022899	0.00110632	0.000523932	8724	tags=47%, list=17%, signal=39%	SORL1/PLD1/NR3C1/PIK3R1/PIM1/CEACAM1/AP1G1/ZNF22/ITGAL/ARNT/KLRK1/KPNA3/IL6ST/PIK3CD/PITPNB/CLK4/TRAM1/EIF4G1/ADAM10/SYK/SF3B1/RNF13/PAPOLA/WRN/ERCC2/TMPO/IKZF1
KEGG_GLYOXYLATE_AND_DICARBOXYLATE_METABOLISM	16	0.728721	2.09119	0.000222618	0.00110632	0.000523932	2473	tags=50%, list=5%, signal=48%	GLYCTK/ACO1/HAO2/MTHFD1/GRHPR/HAO1/AFMID/MTHFD2L
HOEBEKE_LYMPHOID_STEM_CELL_UP	96	0.49073	2.08728	0.000232396	0.00110632	0.000523932	13205	tags=61%, list=26%, signal=45%	ABCA1/RAB14/ITIH4/SH3TC1/IQSEC1/IGHM/HLX/SATB1/COBL/UBR2/ITSN2/MEF2A/SLC33A1/IRF8/DPEP2/LPIN1/SETBP1/KMT5B/CCNL1/NLRP1/CCR9/SLC35E2A/ADGRE2/BCL6/TENT4A/PNN/NUDT3/MACF1/SF3B1/CYTH4/RPS6KA2/NPIPB3/ITGA4/TNFAIP2/BAALC/SETD5/PRKCB/RBM39/TNS3/SCN3A/TNFAIP3/ATR/PLXND1/RBBP6/TRAF3IP3/SPON1/TCF4/MCM3AP/KLF3-AS1/BTK/SFPQ/C11orf21/NCOR2/TRIM33/USP34/ARHGAP25/TRIB2/LRRFIP1/RUNX3
UDAYAKUMAR_MED1_TARGETS_DN	241	0.428816	2.0871	0.000248262	0.00110632	0.000523932	8721	tags=37%, list=17%, signal=31%	CROCCP2/ABTB2/PXDC1/TST/EPB41L4B/PHLPP1/SPAG9/GADD45A/GABARAPL1/PLPP3/CTH/TFPI/STS/NFE2L1/CDA/ST6GAL1/ST7/DNMBP/RIOK3/DNAJB9/PTEN/ETS2/RCAN1/CPM/SAT1/ZNF395/GPRC5C/TTC17/PIM1/MBD1/GRK5/FAS/SRD5A1/HIRA/C11orf95/RSRP1/LIFR/IFRD1/ERAP1/ID2/SEC61A2/OGA/PILRB/TMBIM1/PDE2A/POLG/HMOX1/GPNMB/BRD2/ADCY9/PRRC2B/HERC1/KLHL24/FRMD4B/ZZEF1/UPF1/NR1D2/GADD45B/ZNF767P/EFNA1/TXNIP/BMP6/SPTAN1/ATG14/RETREG2/NEDD4…
REACTOME_FOXO_MEDIATED_TRANSCRIPTION	66	0.526383	2.08567	0.000228519	0.00110632	0.000523932	7754	tags=41%, list=15%, signal=35%	CAT/FOXO1/ABCA6/PINK1/GADD45A/AKT2/PCK1/SMAD4/KAT2B/INS/PPARGC1A/NR3C1/G6PC/RBL2/IGFBP1/SIRT1/FOXO3/STK11/SOD2/CREBBP/TXNIP/BCL6/BTG1/AKT1/CDKN1B/EP300/GCK
BIOCARTA_PTEN_PATHWAY	18	0.7036	2.08447	0.000223664	0.00110632	0.000523932	9416	tags=67%, list=19%, signal=54%	EGFR/PDK2/PIK3R1/PTEN/FOXO3/SOS1/AKT1/PIK3CA/CDKN1B/BCAR1/MAPK1/PDPK1
LI_CYTIDINE_ANALOGS_CYCTOTOXICITY	15	0.741644	2.08197	0.000224316	0.00110632	0.000523932	10378	tags=67%, list=21%, signal=53%	FKBP5/TLE4/MAP4K4/MGMT/GCAT/TPMT/CENPB/MYBBP1A/NT5C3A/TRRAP
BIOCARTA_KERATINOCYTE_PATHWAY	46	0.563707	2.08159	0.000227894	0.00110632	0.000523932	9394	tags=50%, list=19%, signal=41%	MAP2K1/CEBPA/EGFR/PRKCA/MAPK14/RIPK1/ETS2/MAP3K14/TNFRSF1A/FAS/RAF1/TNFRSF1B/MAP3K5/MAP2K3/PRKCE/ETS1/RELA/MAP2K7/MAPK8/MAP2K6/PRKCB/PRKCQ/MAPK1
CHIARADONNA_NEOPLASTIC_TRANSFORMATION_KRAS_CDC25_DN	51	0.552806	2.08152	0.00022941	0.00110632	0.000523932	4894	tags=37%, list=10%, signal=34%	PDK4/PROS1/C3/TMEM176B/TMEM176A/NID1/IL1R1/CDO1/IL11RA/MAN2A1/RNASE4/EIF2AK4/SAA1/FAS/CXCL12/SLPI/STAT3/VCAM1/CEBPB
TONKS_TARGETS_OF_RUNX1_RUNX1T1_FUSION_MONOCYTE_UP	203	0.43553	2.07972	0.000244021	0.00110632	0.000523932	6803	tags=33%, list=14%, signal=29%	CBS/APOE/SORD/MT1X/G0S2/MT1H/PLS3/PLPP3/QPRT/TFPI/PLIN2/ARHGEF12/AKR1C3/ECHS1/ALDH1A2/MT2A/CYP1A1/ST6GAL1/SELENOP/GFOD1/RMND5A/FERMT2/GCSH/SPATS2L/APLP2/HERC5/CRHBP/SFXN1/RAD54L2/AMPD2/ECI2/TCF7L2/EBNA1BP2/IFIT1/HSPA5/SLC5A3/C11orf95/HGF/MX1/SLC16A1/NCLN/MYRF/CTPS1/IFI44/EXT1/TUBB2A/FASTKD1/EPS8/UBA5/PPFIBP1/NR2F6/TRIP6/DNAAF2/PSMD12/LY6E/TEX2/IFRD2/MREG/ADAP2/DUSP6/NOP14/TFPI2/ANKRD40/SPTAN1/IFI…
YAO_TEMPORAL_RESPONSE_TO_PROGESTERONE_CLUSTER_2	55	0.54363	2.07802	0.000228624	0.00110632	0.000523932	6677	tags=36%, list=13%, signal=32%	CAPN3/ERRFI1/CYP1A2/APOA5/HGD/PKLR/EPB41L4B/SOX5/GNAO1/RAB14/AASS/TNXB/CCNL2/CLK1/TIPARP/PIK3CD/CLK4/PAXBP1/AKAP9/ESR1
GRATIAS_RETINOBLASTOMA_16Q24	18	0.701209	2.07738	0.000223664	0.00110632	0.000523932	11718	tags=78%, list=23%, signal=60%	FBXO31/ZCCHC14/SPG7/TCF25/GALNS/MBTPS1/ANKRD11/CHMP1A/ZDHHC7/USP10/MAP1LC3B/KIAA0513/EMC8/SLC7A5
PID_PDGFRB_PATHWAY	129	0.463491	2.07637	0.000234247	0.00110632	0.000523932	9448	tags=43%, list=19%, signal=35%	MAP2K1/LRP1/SLC9A3R2/VAV2/PRKCA/FYN/RPS6KA3/DOCK4/PIK3R1/PTEN/STAT5B/S1PR1/RAPGEF1/BAIAP2/GRB10/ARAP1/AFDN/RAF1/ABL1/CRK/STAT3/CYFIP2/CSK/EPS8/FGR/BLK/PAG1/KSR1/SOS1/PRKCE/EIF2AK2/PIK3CD/LYN/SIPA1/PTPN1/PTPN11/GAB1/PIK3R5/USP6NL/STAT5A/PIK3CA/ITGB3/MAP2K7/DNM2/WASL/BCAR1/MAPK8/ARHGAP35/JAK2/PIK3R6/STAT1/NCK1/MAP2K2/RAB5A/MAPK1/ELK1
REACTOME_NUCLEOBASE_CATABOLISM	36	0.591806	2.07471	0.000227635	0.00110632	0.000523932	6485	tags=44%, list=13%, signal=39%	UPB1/GDA/DPYS/NT5E/DPYD/ENTPD8/AGXT2/XDH/UPP2/ENTPD5/NT5C1B/NT5C2/PNP/ADPRM/NUDT16/SAMHD1
PID_INTEGRIN2_PATHWAY	29	0.620402	2.07325	0.000222866	0.00110632	0.000523932	7771	tags=52%, list=15%, signal=44%	PROC/C3/FGG/F10/FGA/FGB/SPON2/KNG1/ITGAL/VCAM1/ITGAX/ITGAD/GP1BA/ITGB2/ICAM3
KEGG_ENDOMETRIAL_CANCER	52	0.54809	2.07081	0.000229253	0.00110632	0.000523932	9448	tags=44%, list=19%, signal=36%	MAP2K1/EGFR/CTNNA3/AKT2/PIK3R1/PTEN/TCF7L2/RAF1/FOXO3/ARAF/SOS1/PIK3CD/PIK3R5/AKT1/PIK3CA/SOS2/CDH1/TCF7L1/CASP9/MAP2K2/MAPK1/PDPK1/ELK1
REACTOME_CD28_DEPENDENT_PI3K_AKT_SIGNALING	22	0.663641	2.07056	0.000224467	0.00110632	0.000523932	7009	tags=45%, list=14%, signal=39%	AKT2/FYN/PIK3R1/MAP3K14/PRR5/MAPKAP1/MTOR/RICTOR/AKT1/PIK3CA
SMITH_TERT_TARGETS_DN	86	0.49464	2.06738	0.000231107	0.00110632	0.000523932	6102	tags=41%, list=12%, signal=36%	EHHADH/SERPING1/TST/CAT/UGP2/SORD/KANK1/VAV2/CPOX/AKR1C3/KYNU/ALDH3A2/GAMT/SIRPA/VSNL1/A2M/ALDH7A1/FAH/GSTO1/SAA1/GRK5/CBR1/SRD5A1/IL1RN/STAT4/PON2/DHCR24/PNP/PML/LIPA/SP110/CCNG1/NID2/DUSP6/AHCY
YAGI_AML_WITH_11Q23_REARRANGED	340	0.408415	2.06684	0.000252781	0.00110632	0.000523932	7876	tags=33%, list=16%, signal=28%	ANPEP/IL6R/CAPN3/KHK/CYP4A11/SLC27A2/GCLC/N4BP2L1/TENM1/SLC25A42/RARRES2/IMPA1/ABCC6/CTIF/SAMD4A/IVD/CYP4F12/LIN7A/GDF7/ST3GAL6/STS/INSR/EIF4EBP2/SLC25A13/NFATC3/CADM1/ALDH3A2/CD81/ADH5/AK4/NR2C1/DPP4/PPID/KBTBD11/EVI5/DNAJC16/PLCG2/JMJD1C/ANGEL1/RPS6KA3/NR3C1/QKI/ALB/CALCOCO2/PVR/CPM/TMEM131L/TACC1/CRADD/VASH1-AS1/PIM1/BLNK/DDT/ITPR2/GNAI1/WHAMMP3/DIP2C/DEPDC5/DHX16/PBX3/PSKH1/BAP1/PLS1/GLT8D1/C…
WANG_MLL_TARGETS	285	0.416817	2.06623	0.000250941	0.00110632	0.000523932	4521	tags=27%, list=9%, signal=24%	C2/CES2/ALDH2/FAM20A/MAF/AGT/HLF/H6PD/SLC7A2/GDA/NADK2/PDK4/AVPR1A/EVA1A/UGP2/SMOC1/G0S2/F5/ENPEP/FNDC3A/RIDA/DPYD/CD14/FES/HSD11B1/CNKSR3/TBX15/DHRS3/SPON2/SOX5/C4BPA/CCDC68/SCP2/CDO1/HOGA1/CNNM2/GATA4/TMEM140/NAPEPLD/ABCA9/GATA6/ENPP1/SELENOP/SH3TC1/MME/NOTUM/HTR2A/MAFB/STXBP6/SLC27A3/ADH1C/ITIH2/FAM13A/CPQ/ASPA/S1PR1/PLEK2/GRB10/PPM1L/PLAC8/IL1RN/GSTT2B/CABLES1/RAB3IL1/AR/SNED1/PARP14/HNF1B/MA…
BRACHAT_RESPONSE_TO_CISPLATIN	22	0.661937	2.06524	0.000224467	0.00110632	0.000523932	6743	tags=55%, list=13%, signal=47%	DHRS3/EI24/SERPINA3/LPIN1/PMM1/CCNG1/TOB1/TXNIP/ISOC1/LILRA5/NABP1/ABLIM1
REACTOME_ABACAVIR_TRANSPORT_AND_METABOLISM	10	0.827016	2.06497	0.000444642	0.00178292	0.000844363	4968	tags=80%, list=10%, signal=72%	SLC22A1/SLC22A3/PCK1/ADH1A/ABCG2/ABCB1/NT5C2/ADAL
XU_AKT1_TARGETS_6HR	26	0.635304	2.06429	0.000450248	0.00178292	0.000844363	8863	tags=54%, list=18%, signal=44%	SGK2/TAT/INHBC/HERC5/IFIT1/IFIH1/IFIT3/MX1/CDC5L/PLSCR1/HNRNPH1/SOAT1/OAS3/MAP2K5
BIOCARTA_MAPK_PATHWAY	80	0.500148	2.06272	0.000229568	0.00110632	0.000523932	9448	tags=42%, list=19%, signal=35%	MAP2K1/CEBPA/RAPGEF2/MAPK14/RPS6KA3/MAP3K11/RIPK1/MAP3K14/MAP4K4/RAF1/MAP3K2/MAP3K3/MAP3K5/MAP2K3/MAPK4/MKNK1/MAP3K7/MAP3K13/RELA/PAK2/MAP2K7/RPS6KA2/MAPK6/MAPK8/MAP2K6/MAPKAPK5/RPS6KB2/STAT1/MAP2K5/MAP2K2/ATF2/RPS6KB1/MAPK1/ELK1
SMIRNOV_RESPONSE_TO_IR_6HR_UP	168	0.444335	2.06207	0.0002405	0.00110632	0.000523932	5931	tags=27%, list=12%, signal=24%	CES2/PBLD/SLC35D1/GCH1/METTL7A/RXRA/CYP4F3/MT1X/MT1H/GLS2/GADD45A/COQ8A/RETSAT/MT1F/CDIP1/SLC30A1/SDC1/ZBTB20/INPP1/XPC/ZBED1/GAMT/MACO1/ORAI3/ADCY1/C11orf24/TNFRSF10B/CEACAM1/FUCA1/MAP4K4/FAS/EI24/CROT/SOCS2/ITM2B/JADE3/DSE/CLK1/PRKAB1/MYH10/NOTCH1/CCNG1/TMEM168/TENT5A/CLK4/TOB1
BIOCARTA_ARENRF2_PATHWAY	20	0.67648	2.06193	0.000225124	0.00110632	0.000523932	10615	tags=65%, list=21%, signal=51%	POR/PRKCA/GSTA2/MAPK14/CRYZ/HMOX1/NFE2L2/KEAP1/MAPK8/PRKCB/MAPK1/MAFG/MAFK
VERHAAK_AML_WITH_NPM1_MUTATED_UP	185	0.436966	2.06099	0.000241313	0.00110632	0.000523932	9839	tags=41%, list=20%, signal=33%	ACSL1/CLU/GCH1/AQP9/VNN1/CAT/CXCL2/ABHD2/G0S2/TMEM176B/CD14/CFB/TMEM176A/QPRT/STS/FBP1/SMPDL3A/CCL23/AKR1C1/PHKA2/SELENOP/HNMT/MAFB/CD163/SERPINA1/SMCO4/CTSL/ETS2/KCNK5/NAMPT/SAT1/IGF2R/HK3/PBX3/DPEP2/PLS1/CAMK1/CPVL/TLR4/LILRB3/FGR/LILRB1/TCIRG1/HMOX1/PILRA/CAST/PIEZO2/PRDM2/SOD2/SNCAIP/C1QB/SLC15A3/LILRA5/BCL6/MEIS1/ITGB3/TNFSF10/LGALS2/MARCKS/TBXAS1/SNX10/FGL2/PELI1/C1QA/TNFAIP2/LILRB2/SCHIP1/…
HALMOS_CEBPA_TARGETS_UP	49	0.54975	2.06035	0.000228102	0.00110632	0.000523932	6819	tags=43%, list=14%, signal=37%	CXCL2/PLIN2/IL1R1/IGFBP3/SLC30A1/ITGA1/PTK2B/MEGF9/FOXA2/APOC4/ETS2/IL4R/FAS/SLC16A7/BMP2/RAB27A/HMOX1/BMP2K/NFIL3/WAS/BTG1
BIOCARTA_TPO_PATHWAY	24	0.645725	2.05987	0.00044964	0.00178292	0.000844363	8759	tags=54%, list=17%, signal=45%	MAP2K1/PRKCA/PIK3R1/STAT5B/RAF1/STAT3/SOS1/THPO/STAT5A/PIK3CA/JAK2/STAT1/PRKCB
SCHUETZ_BREAST_CANCER_DUCTAL_INVASIVE_UP	351	0.405361	2.05965	0.000253614	0.00110632	0.000523932	9250	tags=38%, list=18%, signal=31%	SDC2/TDO2/MAF/HSD17B6/APOE/SERPINF1/SERPING1/CFH/PROS1/ECM2/C1R/ENPEP/SCG5/C1S/RARRES2/FOXN3/DPYD/HSD17B11/PLS3/SPON2/SAMD4A/NID1/ARHGEF40/IL1R1/ST3GAL6/IGFBP3/NNMT/PLSCR4/FYN/MME/TGM2/KDR/FERMT2/PLCG2/MAFB/IFFO1/QKI/CD163/PTEN/CPQ/MERTK/SMCO4/TLE4/HTRA1/CALD1/TMEM47/TACC1/THSD7A/MEIS2/GRK5/MAP4K4/FAS/SOBP/CTSS/FTL/ZEB1/LDB2/IRF8/TGFBR2/CPVL/NRP1/ADGRL4/COL6A1/SMAD7/ANKRD6/CEMIP/DSE/SKAP2/GIMAP6/…
REACTOME_INTERLEUKIN_3_INTERLEUKIN_5_AND_GM_CSF_SIGNALING	48	0.552301	2.05931	0.000227221	0.00110632	0.000523932	8192	tags=46%, list=16%, signal=38%	TEC/FYN/PRKACA/PIK3R1/STAT5B/IL3/RAPGEF1/BLNK/CRK/CSF2/JAK1/SOS1/PIK3CD/IL2RB/LYN/PTPN11/STAT5A/PIK3CA/SYK/INPP5D/PTPN6/JAK2
BIOCARTA_DEATH_PATHWAY	29	0.615448	2.05669	0.000222866	0.00110632	0.000523932	12963	tags=66%, list=26%, signal=49%	GAS2/RIPK1/MAP3K14/CFLAR/BIRC2/SPTAN1/RELA/BIRC3/TNFSF10/APAF1/CASP10/CASP9/DFFA/CASP3/BID/XIAP/TRADD/NFKBIA/CASP7
BOQUEST_STEM_CELL_UP	261	0.418752	2.05599	0.000249128	0.00110632	0.000523932	5385	tags=29%, list=11%, signal=26%	SDC2/ANPEP/CD302/BHMT2/APOE/SLC39A14/SERPINF1/CFH/ANG/ECM2/SYNE3/LRP1/CES1/C3/EGFR/TENM1/C1R/SLC22A3/F10/TMEM176B/C1S/ABCA8/NT5E/ABCA6/CFB/PLA2G2A/FXYD1/PID1/SPON2/IGF1/ALDH1A1/IGFBP3/PTPRD/PCOLCE2/CDO1/ACOX2/AOX1/DIPK1A/ACKR4/AKR1C1/SERPINA5/HNMT/MME/C6/IRS1/PCOLCE/MAN1C1/MAFB/ADH1B/ADH1C/RNASE4/ELOVL2/ASPA/FST/TRO/RCN3/HTRA1/MEG3/IRS2/MBP/MEIS2/GRIA3/PTPRG/SLC5A3/CXCL12/SERPINA3/COL6A1/ATP8B4/N…
REACTOME_INTERFERON_ALPHA_BETA_SIGNALING	70	0.51193	2.05473	0.000227739	0.00110632	0.000523932	10101	tags=50%, list=20%, signal=40%	IFNAR2/IFNAR1/STAT2/XAF1/TYK2/HLA-E/IFIT2/IFIT1/IRF2/IRF7/IFIT3/MX1/IRF8/IRF5/JAK1/IRF9/OASL/OAS2/IFITM3/PTPN1/PTPN11/SAMHD1/HLA-A/IFI35/PTPN6/RSAD2/OAS3/IRF3/STAT1/HLA-B/USP18/HLA-F/MX2/IRF6/HLA-H
REACTOME_REGULATION_OF_GENE_EXPRESSION_IN_BETA_CELLS	21	0.665914	2.05449	0.000225785	0.00110632	0.000523932	1981	tags=48%, list=4%, signal=46%	HNF4A/PKLR/FOXO1/HNF1A/FOXA3/HNF4G/AKT2/FOXA2/INS/SLC2A2
PID_SHP2_PATHWAY	57	0.534029	2.05379	0.00022899	0.00110632	0.000523932	9008	tags=47%, list=18%, signal=39%	SDC2/IL6R/MAP2K1/EGFR/KDR/IRS1/PRKACA/PIK3R1/TEK/AFDN/RAF1/GNAI1/NOS3/JAK1/PAG1/IL6ST/SOS1/IL2RB/NTF3/PTPN11/GAB1/PIK3CA/ARHGAP35/JAK2/IFNGR1/STAT1/MAP2K2
REACTOME_SLC_MEDIATED_TRANSMEMBRANE_TRANSPORT	250	0.419571	2.05183	0.000246914	0.00110632	0.000523932	6545	tags=32%, list=13%, signal=28%	SLC25A18/SLC13A5/SLC35D1/SLC22A1/SLC43A1/SLC39A14/SLC38A3/SLC38A4/SLC7A2/SLC6A1/SLC39A5/SLCO2B1/SLCO1B3/SLC16A2/SLC22A3/SLC41A2/SLC28A1/SLC6A13/SLC47A1/SLC30A10/SLC2A12/SLC16A10/SLC13A3/SLC6A12/SLC30A1/SLC7A9/SLC35B4/LCN12/SLC25A10/SLC17A1/SLC22A7/RSC1A1/SLC3A1/FGF21/SLC15A1/SLC5A9/SLC31A1/SLC2A2/SLCO1B1/SLC45A3/ALB/SLC34A1/SLC1A1/SLC26A1/RHBG/SLC2A9/CP/SLC1A2/SLC40A1/SLC27A4/SLC39A8/SLC2A8/SLC22…
HASINA_NOL7_TARGETS_DN	13	0.76109	2.0518	0.000224568	0.00110632	0.000523932	1358	tags=31%, list=3%, signal=30%	SDC2/EGFR/MET/SDC1
CHIANG_LIVER_CANCER_SUBCLASS_INTERFERON_UP	26	0.631397	2.05159	0.000450248	0.00178292	0.000844363	2219	tags=35%, list=4%, signal=33%	TDO2/SLC38A4/APOF/KCNT2/PLA2G2A/GOT1/HPGD/NNMT/SERPINA7
REACTOME_TRIF_TICAM1_MEDIATED_TLR4_SIGNALING	97	0.481694	2.05144	0.000232775	0.00110632	0.000523932	9448	tags=45%, list=19%, signal=37%	MAP2K1/PPP2R1B/CD14/IRAK2/MAPK14/RPS6KA3/NKIRAS1/RIPK1/IKBKG/SAA1/IRF7/MEF2A/CUL1/BIRC2/TICAM2/MAP2K3/TLR4/TICAM1/TANK/MAP3K7/NKIRAS2/DUSP6/PTPN11/DUSP3/RELA/BIRC3/AGER/PPP2CB/MAP2K7/TAB1/TAB2/RPS6KA2/MAPK8/MAP2K6/MEF2C/NFKBIB/TAB3/PPP2R5D/IRF3/UBE2D3/ATF2/VRK3/MAPK1/ELK1
HAN_SATB1_TARGETS_DN	384	0.400576	2.05133	0.000256937	0.00110632	0.000523932	6284	tags=31%, list=12%, signal=27%	CLU/METTL7A/CDH2/AQP3/PXDC1/SLCO1B3/EGFR/G0S2/SCG5/PC/DST/ADGRG6/CFB/PRKCA/FAM20C/INHBE/ALDH6A1/SEC14L2/AMFR/NR3C2/IGFBP4/ST3GAL6/AKR1C3/SLC38A10/VWA8/MYO18A/PCCA/GATA6/ALDH3A2/DYSF/ENPP1/AKAP1/SELENOP/AK4/C4orf19/PDSS2/NADK/BCKDHB/STXBP6/VPS4A/SATB1/SMARCA1/TNS1/ECH1/PDK2/LSS/STX2/SDF4/VSNL1/ACSF2/HDAC5/SMAD6/RBL2/DUSP1/SAT1/ZNF395/HADH/TACO1/IGF2R/TCF7L2/NRG1/CRADD/IFIT2/SLC22A18/FUCA1/GSAP/MFH…
REACTOME_ABC_TRANSPORTERS_IN_LIPID_HOMEOSTASIS	18	0.692133	2.05049	0.000223664	0.00110632	0.000523932	4180	tags=61%, list=8%, signal=56%	ABCA5/ABCG5/ABCG8/ABCA6/ABCA9/APOA1/PEX3/ABCA10/ABCD3/ABCA2/PEX19
REACTOME_BIOTIN_TRANSPORT_AND_METABOLISM	11	0.799119	2.04992	0.00045045	0.00178292	0.000844363	4447	tags=64%, list=9%, signal=58%	ACACB/PC/PCCA/MCCC1/PCCB/BTD/MCCC2
MCBRYAN_PUBERTAL_BREAST_3_4WK_DN	37	0.58061	2.04768	0.000227583	0.00110632	0.000523932	2876	tags=32%, list=6%, signal=31%	ZBTB16/COQ8A/CTH/IGFBP3/HP/IDH1/PRKAG2/REEP6/ALAS1/IGHM/PHGDH/MBP
DACOSTA_UV_RESPONSE_VIA_ERCC3_TTD_DN	84	0.491641	2.04698	0.000230627	0.00110632	0.000523932	12110	tags=57%, list=24%, signal=43%	ATRN/MIA2/DST/CTIF/PLPP3/ITCH/MALT1/PEX14/DOCK4/NECTIN3/LRP6/TMEM131L/SGMS1/KLHL20/SLC16A7/SMAD7/CDC42BPA/MPHOSPH9/SKAP2/TRIM24/BTAF1/TEAD1/ACVR2A/HEG1/DMD/ZEB2/ATXN1/CDKN1B/FAM168A/USP15/MSH3/NFIB/GALK2/WDR37/EIF3A/DNAJC2/HERC4/GPATCH8/PIK3C2A/DOCK9/ARAP2/FAM193A/SFMBT1/TOGARAM1/PTPRM/TSC22D2/RB1CC1/TMCC1
REACTOME_ABC_FAMILY_PROTEINS_MEDIATED_TRANSPORT	103	0.47529	2.04596	0.000232666	0.00110632	0.000523932	5327	tags=24%, list=11%, signal=22%	ABCC2/ABCA5/ABCG5/ABCC3/ABCG8/ERLIN1/ABCA8/ABCB4/ABCA6/ABCC6/ABCA9/APOA1/SEL1L/PEX3/ABCA10/ABCD3/OS9/RNF185/ABCB1/ABCA2/PEX19/ABCB7/ABCF1/ABCC9/PSMD12
FERREIRA_EWINGS_SARCOMA_UNSTABLE_VS_STABLE_DN	94	0.481845	2.04574	0.000231	0.00110632	0.000523932	9741	tags=43%, list=19%, signal=34%	ECHDC2/ANGPTL3/SEMA4G/TMEM176B/FES/TMEM176A/ALDH6A1/AMFR/DHRS1/CRY2/LYVE1/CYLD/SPHK2/TMEM53/PGPEP1/EXPH5/ELAC2/NAGLU/CABLES1/ATXN7/EPS8L2/MAPKAP1/C9orf78/IRF9/AHNAK/GNB5/ZNF446/SPR/LRPAP1/INPP5A/ABTB1/IFI35/MAP1LC3A/OTUD5/RNF167/PQLC3/INMT/GNG7/TMEM230/SLC16A5
PID_HNF3A_PATHWAY	44	0.559261	2.04548	0.000228624	0.00110632	0.000523932	8245	tags=50%, list=16%, signal=42%	COL18A1/CYP2C18/FOXA3/SHH/C4BPB/VTN/APOB/FOXA2/INS/SERPINA1/NFIC/SFTPD/AR/CEBPB/SOD1/CREBBP/ESR1/CDKN1B/EP300/NFIB/NFIA/NR2F2
KEGG_ARACHIDONIC_ACID_METABOLISM	58	0.528989	2.04527	0.000227428	0.00110632	0.000523932	3248	tags=33%, list=6%, signal=31%	CYP2C18/CYP4A22/CYP4A11/CYP2C9/CYP4F3/CYP2C19/CYP2C8/CYP2B6/PLA2G2A/EPHX2/CYP2J2/CYP4F2/AKR1C3/PLA2G12B/CYP2E1/GPX3/GPX2/CYP2U1/CBR1
YAO_TEMPORAL_RESPONSE_TO_PROGESTERONE_CLUSTER_3	22	0.655336	2.04465	0.000224467	0.00110632	0.000523932	11224	tags=64%, list=22%, signal=49%	GADD45A/HPGD/ITIH1/MINPP1/PTEN/MBTD1/IGHV1-18/IGKC/JCHAIN/ESR1/IGHA1/IGKV4-1/CA2/IGHV2-5
REACTOME_CASPASE_ACTIVATION_VIA_DEATH_RECEPTORS_IN_THE_PRESENCE_OF_LIGAND	16	0.712166	2.04368	0.000222618	0.00110632	0.000523932	7115	tags=56%, list=14%, signal=48%	CD14/RIPK1/TNFRSF10B/FAS/CFLAR/TICAM2/TLR4/TICAM1/TNFSF10
KARLSSON_TGFB1_TARGETS_DN	190	0.432154	2.04285	0.000243013	0.00110632	0.000523932	9055	tags=43%, list=18%, signal=35%	ACAA2/ALAD/TMEM176B/GABARAPL1/MAOA/TBC1D2B/IGFBP4/SCP2/ACBD4/MET/CTSZ/GATA6/C4A/TGM2/EPHX1/IQCJ-SCHIP1/STARD4/PIK3R1/OSBPL9/ZNF395/CHP1/MGST1/TMBIM6/B3GAT1/ID1/NBR1/TPMT/ADIPOR2/WBP2/CTSB/RSRP1/SLC44A1/SMARCA2/SLC16A1/GRN/ARNT/SHROOM3/DCAF8/STAT3/TNIP1/ITM2B/CTSA/NDFIP1/ID2/COL6A1/ALCAM/CCNL2/KCND3/TNRC6B/RNF11/DENND4C/TRIM24/GSTM1/LY6E/MTUS1/GAA/NID2/GAS1/ENPP4/GRINA/ADAM10/COPZ2/APPL2/TBCEL/USP…
BROCKE_APOPTOSIS_REVERSED_BY_IL6	146	0.448049	2.04178	0.000237304	0.00110632	0.000523932	8694	tags=38%, list=17%, signal=31%	GATM/DAPK1/MT1X/MT1H/GADD45A/TIAF1/PTP4A1/ST3GAL6/PAN2/MYLK/MSMO1/RAPGEF4/DEPP1/DNAJB9/NAMPT/ELL2/ID1/PIM1/PTPRG/EIF5/ADIPOR2/CCNC/MX1/STAT3/DNAJA2/ID2/FOXO3/CEBPB/IL6ST/IRF9/PLSCR1/GADD45B/EPB41L2/TMED7/HEG1/PTPN11/GAS6/CAV2/DUSP3/SF1/BCL6/TNFSF10/SIK1/PDGFRA/NMI/RNF13/MARCKS/ZFP36/MCL1/FAM3C/LRMP/SGK1/IFNGR1/RHOBTB3/STAT1
BROWN_MYELOID_CELL_DEVELOPMENT_UP	162	0.441385	2.04086	0.000238892	0.00110632	0.000523932	6528	tags=31%, list=13%, signal=27%	ANPEP/CAPN3/C2/CLEC4M/MYO1B/CLDN1/PZP/C3/F10/DGAT2/XDH/SERPINC1/STOM/CCL15/ANTXR2/PLG/CNDP2/APOL2/HLX/RNASE4/SIRPA/PYGL/MSRB1/SGMS2/SAT1/SLC31A2/SCARB2/TNFRSF1A/CEACAM1/IL1RN/CTSS/REN/AOAH/GRN/HEBP1/ID2/ITGAX/ALCAM/FGR/VSIR/MPEG1/KLHDC4/GSTM1/ATP6V1B2/IL1R2/SPACA7/CEBPD/LILRA6/SLC15A3/LILRA5/GRINA
REACTOME_SIGNALING_BY_VEGF	105	0.471957	2.04037	0.000232126	0.00110632	0.000523932	9607	tags=40%, list=19%, signal=32%	VAV2/PRKCA/ELMO1/SHC2/WASF3/PTK2B/AKT2/FYN/KDR/MAPK14/PRKACA/PIK3R1/BAIAP2/ROCK2/CDH5/PRR5/ITPR2/CRK/WASF1/FLT4/NRP1/CYFIP2/NOS3/MAPKAP1/MTOR/CALM1/PAK2/CTNND1/RICTOR/AKT1/PXN/PIK3CA/ITGB3/BCAR1/AXL/VEGFB/ROCK1/PRKCB/NCKAP1L/NCK1/PDPK1/VEGFA
GAVIN_FOXP3_TARGETS_CLUSTER_P7	90	0.483958	2.03881	0.000231214	0.00110632	0.000523932	6836	tags=33%, list=14%, signal=29%	HS3ST3B1/MSRA/NT5E/MBNL3/DST/ARHGAP20/PRG4/ST3GAL6/ENPP1/GALM/ECM1/MYO1E/HIPK2/GRAMD2B/RESF1/ENO3/IGF2R/ABCB1/SOCS2/PRF1/PPP1R3E/AFP/LRRC8D/TMEM64/PRNP/SHE/IFITM3/FAM89A/NCOA7/APPL2
SIG_PIP3_SIGNALING_IN_B_LYMPHOCYTES	36	0.581363	2.03809	0.000227635	0.00110632	0.000523932	9847	tags=58%, list=20%, signal=47%	NR0B2/TEC/AKT2/PLCG2/RPS6KA3/PTEN/ITPR2/FOXO3/LYN/GAB1/PIK3R5/AKT1/PIK3CA/SYK/RPS6KA2/FLOT2/PTPRC/BCR/RPS6KB1/PDPK1/PHF11
REACTOME_SYNTHESIS_OF_PC	28	0.615939	2.03784	0.000225175	0.00110632	0.000523932	8751	tags=57%, list=17%, signal=47%	MFSD2A/BCHE/LPIN2/PEMT/PCTP/CSNK2A2/CHKA/CHPT1/SLC44A1/LPIN1/LPIN3/PHOSPHO1/STARD10/CEPT1/PCYT1A/CHKB
GARGALOVIC_RESPONSE_TO_OXIDIZED_PHOSPHOLIPIDS_SALMON_DN	15	0.725812	2.03753	0.000448632	0.00178292	0.000844363	8129	tags=67%, list=16%, signal=56%	ADGRG6/PROX1/TRIM25/CXADR/NUDT4/FAM49A/APOL3/LYN/GJA4/KLRG1
REACTOME_DEGRADATION_OF_CYSTEINE_AND_HOMOCYSTEINE	14	0.739653	2.03728	0.000224316	0.00110632	0.000523932	1247	tags=50%, list=2%, signal=49%	TST/CTH/MPST/CDO1/GOT2/SLC25A10/CSAD
CADWELL_ATG16L1_TARGETS_DN	62	0.518566	2.03568	0.000225581	0.00110632	0.000523932	9022	tags=44%, list=18%, signal=36%	HAL/PDK4/AC129492.1/IVD/DHRS1/TTR/IGHM/FKBP5/PPARGC1A/SATB2/MCC/VCAM1/STOX2/RALGPS2/LRIG3/JMJD7-PLA2G4B/PPFIBP1/TMEM242/NFE2L2/D2HGDH/RGS5/PLET1/SMIM10L1/YTHDC2/SGK1/P4HA1/POT1
BHAT_ESR1_TARGETS_NOT_VIA_AKT1_DN	86	0.487035	2.03559	0.000231107	0.00110632	0.000523932	7238	tags=44%, list=14%, signal=38%	RXRA/PDK4/ALAD/KLF9/TLE1/KYNU/CGN/TRAM2/ENPP1/UGT1A6/INSIG2/ZKSCAN1/PLEKHF1/AL162171.1/PTPRK/ZFYVE1/TCF7L2/CYB5D2/PPARG/PSD3/SHROOM3/NRP1/EXT1/RGL1/MAP3K5/CDK6/SLC22A23/YPEL2/CPEB4/DLL1/CREB3L2/EFNA1/HBP1/RNF43/ESR1/LAMB1/ATXN1/UBE2H
REACTOME_BIOSYNTHESIS_OF_SPECIALIZED_PRORESOLVING_MEDIATORS_SPMS	19	0.675362	2.03527	0.000223514	0.00110632	0.000523932	1880	tags=53%, list=4%, signal=51%	CYP2D6/CYP2C9/CYP1A2/CYP3A4/CYP2C8/EPHX2/HPGD/CYP1A1/PTGR1/CYP2E1
REACTOME_EICOSANOIDS	12	0.771646	2.03467	0.000449944	0.00178292	0.000844363	992	tags=58%, list=2%, signal=57%	CYP4A22/CYP4A11/CYP8B1/CYP4F3/CYP4F11/CYP4F12/CYP4F2
REACTOME_NEGATIVE_REGULATORS_OF_DDX58_IFIH1_SIGNALING	34	0.587737	2.03372	0.000225479	0.00110632	0.000523932	9744	tags=53%, list=19%, signal=43%	NLRX1/ITCH/RNF125/TRIM25/HERC5/CYLD/IFIH1/MAVS/UBA7/DDX58/NLRC5/RNF216/OTUD5/IRF3/ATG12/UBE2D3/PCBP2/TNFAIP3
PASQUALUCCI_LYMPHOMA_BY_GC_STAGE_UP	278	0.41126	2.03363	0.000250501	0.00110632	0.000523932	7337	tags=31%, list=15%, signal=27%	ECHDC2/FBXO17/SH3BGRL2/TST/SEMA4G/SMOC1/GLS2/CPED1/ABCA1/PECR/LPIN2/SLC38A10/P4HB/MYOM1/DENND5B/MT2A/CTSZ/ENPP1/SDC1/FNIP2/FOXP2/TGM2/SLC46A1/SURF4/RRBP1/LMAN1/TF/CPEB3/STARD5/PRRG4/SEL1L/EXTL2/AIG1/PVR/EDEM1/TPST2/ELL2/ALDH7A1/IRS2/PLEKHF1/ECI2/PDIA4/BLNK/ABCB1/HSP90B1/SEC24A/TPST1/TMEM38B/CDC42BPB/NUDT4/SRP54/SHROOM3/TOP1MT/PEX11A/DUSP16/RASIP1/PHLDA1/ANKRD6/MCFD2/FILIP1/PON2/TMEM150A/CEBPB/IL6…
NAKAMURA_ADIPOGENESIS_LATE_UP	97	0.477467	2.03344	0.000232775	0.00110632	0.000523932	6993	tags=34%, list=14%, signal=29%	IGF2/ACSL5/SIK2/ACACB/G0S2/FOXO1/ABCA1/PLIN2/NID1/STOM/CCDC50/INSIG1/STAT5B/ACSF2/IRS2/IL22RA1/IGF2R/SMPD1/SLC27A4/MGMT/ABL1/PPARG/LPIN1/IRF9/CCNG1/NFIL3/SCD/ACVR2A/EFNA1/CEBPD/GAS6/ZNF24/PPP2R5A
BIOCARTA_TOLL_PATHWAY	25	0.63167	2.03236	0.000899281	0.00318295	0.00150739	7787	tags=52%, list=15%, signal=44%	PPARA/MAPK14/IKBKG/MAP3K14/MAP2K3/MYD88/EIF2AK2/MAP3K7/RELA/TAB1/TLR3/MAPK8/MAP2K6
BROWNE_HCMV_INFECTION_2HR_UP	40	0.566145	2.03226	0.000229253	0.00110632	0.000523932	5531	tags=38%, list=11%, signal=33%	IGF2/GCH1/APOE/ECM2/N4BP2L1/RARRES2/DHRS3/ERP44/ADH1A/ADH1B/ADH1C/ADCY1/SNED1/ECPAS/FYB1
ZHENG_RESPONSE_TO_ARSENITE_UP	15	0.723684	2.03156	0.000448632	0.00178292	0.000844363	4939	tags=60%, list=10%, signal=54%	MT1X/MT1H/MT1E/MT1M/MT2A/MT1G/GCLM/MT1B/HMOX1
BIOCARTA_MET_PATHWAY	33	0.590438	2.03118	0.00022482	0.00110632	0.000523932	9448	tags=55%, list=19%, signal=44%	MAP2K1/MET/PTK2B/PIK3R1/PTEN/RAPGEF1/RAF1/HGF/CRK/STAT3/SOS1/PTPN11/GAB1/PIK3CA/MAPK8/MAP2K2/MAPK1/ELK1
REACTOME_PI_METABOLISM	84	0.487829	2.0311	0.000230627	0.00110632	0.000523932	9195	tags=45%, list=18%, signal=37%	MTMR10/PIK3C2G/MTMR4/RAB14/TNFAIP8L1/MTM1/PIK3R1/PTEN/PLEKHA5/PI4K2B/VAC14/PNPLA7/PLEKHA3/PLEKHA1/PIK3R4/PNPLA6/PIK3C3/PIKFYVE/PLEKHA2/PIK3CD/MTMR14/INPP5E/PI4K2A/PITPNB/INPP5K/PIK3R5/GDPD5/PLEKHA6/PIK3CA/SBF1/INPP5D/PIP4K2A/FIG4/MTMR7/MTMR9/PIK3R6/RAB5A/PLEKHA4
REACTOME_RORA_ACTIVATES_GENE_EXPRESSION	18	0.68541	2.03058	0.000223664	0.00110632	0.000523932	8500	tags=61%, list=17%, signal=51%	RXRA/PPARA/CPT1A/RORA/HELZ2/CHD9/CREBBP/NCOA2/EP300/TBL1X/CARM1
ZHANG_INTERFERON_RESPONSE	23	0.643355	2.03043	0.00044964	0.00178292	0.000844363	9944	tags=65%, list=20%, signal=52%	IFIT2/MX1/IFRD1/IFI44/IRF9/OASL/OAS2/SP110/IFITM3/RTP4/OAS3/IFI16/IRF3/STAT1/MX2
LINDGREN_BLADDER_CANCER_CLUSTER_3_DN	226	0.420448	2.03	0.000247097	0.00110632	0.000523932	8718	tags=39%, list=17%, signal=32%	LCAT/TTC38/NT5E/DST/ADGRG6/CFHR1/GLUD1/TBC1D2B/SAMD4A/ARHGEF40/SORL1/CDIP1/ABCD4/SH3PXD2A/HIBCH/TK2/CD81/HNMT/SPRY2/CBR4/RMND5A/PLCG2/MAN2C1/TM4SF4/SMAD6/GPX2/ETFA/GSTO1/GRB10/TSPYL1/DGLUCY/NUDT13/NMRK1/SNX19/ZNF33B/AJUBA/CFLAR/AKAP13/FGFR3/LGMN/PSD3/COL27A1/ERAP1/ATXN7L1/WNT5B/EXT1/PRXL2A/SEMA6A/ZNF516/HMG20A/MLLT10/RGS12/CHD9/FARP2/NEIL1/TRIP6/PML/FAM160B2/NOTCH1/OXA1L/AHNAK/MADD/EPB41L2/ARSD/C…
SAENZ_DETOX_PATHWAY_AND_CARCINOGENESIS_DN	13	0.752327	2.02818	0.000224568	0.00110632	0.000523932	4252	tags=69%, list=8%, signal=63%	CYP2D7/ABCC2/CYP3A5/CYP2D6/CYP3A4/CYP2C8/CYP4F2/GSTO1/GSTK1
DITTMER_PTHLH_TARGETS_DN	70	0.504858	2.02635	0.000227739	0.00110632	0.000523932	9825	tags=46%, list=20%, signal=37%	MT1X/MT1H/RRAS2/SERPINA4/RAPGEF2/AOX1/MT2A/MT1G/FERMT2/PIK3R1/ALDH7A1/FAH/BCKDHA/TOMM70/SEC24A/SPEN/MAP3K7/FBXO7/SP110/MINK1/EIF4G1/KIF3B/PIK3CA/PANX1/MAPK6/KISS1/ZDHHC7/TBC1D1/DFFA/MRPL34/CUL4A/IVNS1ABP
ONDER_CDH1_TARGETS_2_UP	255	0.413309	2.02574	0.00024728	0.00110632	0.000523932	8368	tags=38%, list=17%, signal=32%	SDC2/ANPEP/SLC46A3/SERPINF1/CDH2/SLC7A2/ZBTB16/PXDC1/SCG5/LEPR/ABCA8/KLF9/FOXN3/ABLIM3/PRKCA/ALDH6A1/ZFHX4/PID1/PLPP3/AGTR1/TFPI/NID1/LIN7A/ARHGEF40/IGFBP4/IGFBP3/PCOLCE2/NNMT/AOX1/ZCCHC24/DLC1/FLVCR2/TRAM2/ENPP1/MME/PPP1R3C/BIN1/FERMT2/PCOLCE/SYNE1/KAT2B/GK/DOCK4/RNASE4/FKBP5/NECTIN3/FAT4/SATB2/DUSP1/DDAH1/GRB10/PPARG/FTL/ZNF22/ZEB1/IL17RC/SNED1/WNT5B/NRP1/RGL1/CYFIP2/COL6A1/ITGA7/NAV2/EPS8/CDK5…
CHEBOTAEV_GR_TARGETS_UP	75	0.497329	2.0251	0.000229043	0.00110632	0.000523932	4910	tags=35%, list=10%, signal=31%	ZBTB16/GNMT/CYP27A1/NDRG2/HPGD/TMEM140/ENPP1/ST6GAL1/IQGAP2/CPEB3/KCTD14/FKBP5/NR3C1/EDNRB/CCDC71L/LAP3/DOCK5/IFIT2/RAMP3/NRP1/PMM1/SEMA6A/TTC28/ACOT6/CHD9/IL17RB
HEIDENBLAD_AMPLICON_8Q24_DN	39	0.568326	2.02473	0.00022941	0.00110632	0.000523932	6799	tags=44%, list=13%, signal=38%	CFHR1/CNKSR3/FZD4/SEC63/NEK6/NT5DC1/NAB1/NT5C2/RBM33/GSTK1/TMEM242/SLC9A8/LPP/RABEPK/IRAK3/SRSF11/HPS1
BOYLAN_MULTIPLE_MYELOMA_PCA3_DN	64	0.513607	2.02461	0.000227324	0.00110632	0.000523932	5903	tags=33%, list=12%, signal=29%	UPB1/EHHADH/HSD17B13/ZCCHC14/ATP11A/RDX/RIN3/STOM/PTGR1/SUCLG2/RELN/ECI2/CEACAM1/ST3GAL5/APOBEC2/LIFR/DENND4C/DDX3Y/CSTF2T/ARHGAP21/SKP2
MITSIADES_RESPONSE_TO_APLIDIN_UP	444	0.389805	2.02393	0.000261438	0.00110632	0.000523932	10230	tags=38%, list=20%, signal=31%	CBS/PHYH/ABCA8/FOXO1/TUT7/SORBS2/IMPA1/GADD45A/GABARAPL1/PLPP3/IVD/IGF1/CTH/PLIN2/RAPGEF2/KLHL21/NFE2L1/LRRC2/ZBTB48/SLC25A13/SC5D/PDE3B/TK2/STOM/RORA/STBD1/DENND4A/PPP1R3C/SIK3/PDE8A/ATG9A/INS/AVPI1/RIOK3/PPARGC1A/HERPUD1/AASS/FAM13A/NDEL1/BACH1/CHKA/CENPC/NAMPT/DUSP1/FRAT1/IRS2/TTC17/FNBP1/TSPYL1/SPOP/OTUD4/HLA-E/NMRK1/MAP3K14/IFIT1/ST3GAL5/ATP6V0A1/SEC62/IRF7/BIN3/CTSS/FBP2/KDM7A/DIP2C/CTSB/CI…
DER_IFN_BETA_RESPONSE_UP	103	0.470094	2.02359	0.000232666	0.00110632	0.000523932	9161	tags=43%, list=18%, signal=35%	C1S/PARP4/SMAD4/TRIM14/ETS2/TRIM26/HADHB/CALD1/HADH/HLA-E/IFIT2/IFIT1/IRF2/IFIT3/IFIT5/MX1/IFI44/PML/EIF2AK2/LIPA/IRF9/OASL/TEAD1/PLSCR1/OAS2/EPS15/SP110/CEBPD/PTPN11/TRIM22/GBP1/BTG1/ELF1/HLA-A/PLOD2/NMI/IFI35/IFI16/EIF3A/CD164/STAT1/DNAJC2/BCLAF1/ELK4
REACTOME_ROLE_OF_PHOSPHOLIPIDS_IN_PHAGOCYTOSIS	81	0.488428	2.02159	0.000228885	0.00110632	0.000523932	12446	tags=54%, list=25%, signal=41%	PLD1/PLCG2/PIK3R1/IGHV4-39/ITPR2/IGLV1-47/PLD3/IGHG1/PRKCE/IGLV3-1/IGKV3-20/IGHV2-70/IGKV2-28/IGLC2/IGHV3-7/PIK3CA/SYK/IGHV3-23/IGHV4-59/IGHG2/IGKV1-39/IGLV2-23/IGHV3-48/IGKV2-30/IGKV1-5/IGKV2D-30/IGLV1-40/IGLV1-51/IGKV1-12/IGLV2-11/IGKV4-1/IGHV3-33/IGLV2-14/IGKV1-16/IGLC3/IGLV3-19/IGHV2-5/IGKV1D-39/PIK3CB/IGKV1-17/IGHV4-34/ITPR1/PLCG1/IGKV3-11
IIZUKA_LIVER_CANCER_PROGRESSION_G1_G2_UP	12	0.76657	2.02129	0.000449944	0.00178292	0.000844363	5392	tags=58%, list=11%, signal=52%	KCNJ8/GABARAPL1/ADH1A/KCNJ4/PDLIM5/LYRM9/OAS2
DAVICIONI_TARGETS_OF_PAX_FOXO1_FUSIONS_UP	258	0.412075	2.02115	0.000248509	0.00110632	0.000523932	9002	tags=38%, list=18%, signal=31%	SDC2/COL18A1/ASS1/AQP3/UGP2/GATM/EPB41L4B/FOXO1/FMR1/BCHE/PRKCA/GADD45A/ABAT/TIAF1/NID1/NNMT/MET/DIPK1A/PCCA/TRAM2/CADM1/SC5D/DTX4/CAMK2N1/MME/FGGY/ECM1/AKAP12/INPP1/SPATS2L/SATB1/NR3C1/AKAP2/CREG1/HDAC5/FST/DUSP1/MEG3/TMEM47/IRS2/ZNF395/DDAH1/FGFR4/TCF7L2/PDGFC/NMRK1/IL4R/CARD10/ST3GAL5/NCOA4/MAP4K4/WBP1L/SDC4/HEBP1/SOCS2/ITM2B/CTSA/ID2/MAP3K5/ACAT2/CLMN/PON2/JAK1/GAREM1/FAM49A/PTPRU/JAKMIP2/SEP…
BHAT_ESR1_TARGETS_VIA_AKT1_DN	80	0.490045	2.02106	0.000229568	0.00110632	0.000523932	7238	tags=42%, list=14%, signal=36%	PDK4/ALAD/KLF9/TLE1/PLPP3/IL1R1/CGN/FAXDC2/MKX/RBL2/INSIG2/LMBRD1/ZKSCAN1/PLEKHF1/AL162171.1/BLNK/VPS9D1/PSD3/SHROOM3/ZNF277/NRP1/CDK6/SLC22A23/LETMD1/EPS8/YPEL2/CPEB4/DLL1/CREB3L2/EFNA1/HBP1/ESR1/LAMB1/UBE2H
PID_THROMBIN_PAR1_PATHWAY	43	0.554277	2.02066	0.000227428	0.00110632	0.000523932	8759	tags=49%, list=17%, signal=40%	PRKCA/GNAO1/F2RL2/F2/PIK3R1/ROCK2/GNAI2/GNAI1/AKAP13/GNAQ/PLCB2/GNA11/NOS3/SNX1/GNA14/ARHGEF1/PIK3CA/GNG2/DNM2/ROCK1/PRKCB
BIOCARTA_IL12_PATHWAY	19	0.670211	2.01974	0.000223514	0.00110632	0.000523932	8192	tags=42%, list=16%, signal=35%	IL18R1/MAPK14/TYK2/STAT4/IL12RB2/MAPK8/MAP2K6/JAK2
GROSS_HYPOXIA_VIA_ELK3_ONLY_UP	32	0.590973	2.0196	0.000223864	0.00110632	0.000523932	7740	tags=50%, list=15%, signal=42%	PGM1/SPAG9/GADD45A/RAPGEF2/GSPT2/AKAP12/HERPUD1/FST/PDLIM5/SLPI/EGLN1/CEBPB/NFIL3/RND3/ASCC2/DHRS9
GAVIN_FOXP3_TARGETS_CLUSTER_P4	100	0.471643	2.01904	0.0002331	0.00110632	0.000523932	7399	tags=39%, list=15%, signal=33%	CNGA1/CAPN3/SH3BGRL2/GPLD1/MBNL3/BACH2/VAV2/TTC7B/ST3GAL6/CD81/APOL2/EPAS1/ADH1C/RAPGEF4/IL1RL2/FAH/GSTO1/KIAA1671/PIM1/PPM1L/RRAGD/ETFBKMT/RAMP3/TNFRSF1B/NRP1/ALCAM/ATP8B4/AFP/ALS2CL/FRMD4B/IL2RB/GADD45B/NFIL3/IL1R2/STX11/SOAT1/PRKAR1B/RFLNB/TIAM1
MONNIER_POSTRADIATION_TUMOR_ESCAPE_UP	395	0.393196	2.01857	0.000258264	0.00110632	0.000523932	10949	tags=41%, list=22%, signal=32%	BACE1/GLDC/TANGO6/PQLC1/TTPAL/ASS1/GCLC/PC/MAN1A1/PRKCA/CGNL1/XDH/SAMD4A/FAM83G/NNMT/MTHFD1/FDX1/EIF4EBP2/SLC35B4/SH3PXD2A/FAM149A/TTC39C/IL18R1/SDC1/AKAP1/SCAP/TF/ANKRD13A/SPTBN1/PIK3R1/KCNK5/PPIF/RAPGEF1/DEPTOR/SLC19A1/MRGPRF/LONP1/AMPD2/ELAC2/OTUD4/BLNK/PPM1L/TRIM2/MAP4K4/CDH5/PDPR/GCLM/SLC25A44/ZC3H18/POLDIP2/RAMP3/USP20/MCC/BAP1/TIRAP/DHX33/NOL8/PNPLA6/CLEC1A/NRP1/FAM102A/ARGLU1/MAP2K3/CDK6/…
HASLINGER_B_CLL_WITH_17P13_DELETION	23	0.639421	2.01801	0.00044964	0.00178292	0.000844363	12793	tags=70%, list=25%, signal=52%	RRAS2/TBC1D2B/SCP2/GNAI2/GLOD4/ZZEF1/GEMIN4/MINK1/PRPF8/ASMTL/FXR2/MAPRE3/GPS2/TNPO3/PRDX4/SENP3
WENG_POR_TARGETS_GLOBAL_UP	18	0.681035	2.01762	0.000223664	0.00110632	0.000523932	8169	tags=56%, list=16%, signal=47%	CES2/CYP2C18/CYP2C8/MSMO1/CYP7A1/TCEA3/CYP51A1/GSTM1/GCK/HMGCS1
KEGG_LYSOSOME	121	0.455136	2.01472	0.000234742	0.00110632	0.000523932	12100	tags=51%, list=24%, signal=39%	HYAL1/CTSO/AP1M1/CTSZ/PLA2G15/CTSL/ACP2/IGF2R/LAMP1/SCARB2/SMPD1/ARSB/NAGLU/FUCA1/ATP6V0A1/CTSS/GALNS/CTSB/AP1G1/ARSA/TPP1/ABCA2/GNPTAB/LGMN/MCOLN1/CTSA/MFSD8/PSAP/TCIRG1/LIPA/NAGA/GAA/CLTCL1/AP3D1/CD68/ACP5/AP4S1/GUSB/CTSF/AP3S2/HEXA/CTNS/NAPSA/SLC17A5/CD164/PPT2/LAMP2/MANBA/CLTC/GM2A/HEXB/HGSNAT/ATP6V0D1/GGA3/GNS/NAGPA/M6PR/GNPTG/AP1B1/CTSK/DNASE2/GGA2
REACTOME_LYSINE_CATABOLISM	12	0.764023	2.01457	0.000449944	0.00178292	0.000844363	8752	tags=83%, list=17%, signal=69%	AADAT/PIPOX/GCDH/AASS/ALDH7A1/PHYKPL/DLD/CRYM/OGDH/DLST
BOWIE_RESPONSE_TO_EXTRACELLULAR_MATRIX	17	0.69103	2.01456	0.000670092	0.00249737	0.00118271	11767	tags=65%, list=23%, signal=50%	IFIT2/IFIT1/IRF7/IFIT3/MX1/IFI35/IFI16/IFNGR1/STAT1/IRF1/IFI6
GERY_CEBP_TARGETS	125	0.452649	2.01446	0.000234632	0.00110632	0.000523932	5604	tags=30%, list=11%, signal=26%	ACSL1/IGF2/CLU/GCH1/C3/ABCA1/GIPC2/ORM1/CD1D/XDH/ECHS1/HP/ANGPTL4/KNG1/BCKDHB/ELOVL6/TGOLN2/GREM2/NUS1/DNAJB9/LSS/DUSP1/SAT1/BAIAP2/TOM1L1/PIM1/SAA1/APBB1IP/PPARG/HGF/IFRD1/ID2/RDH11/HMOX1/ZFAND2A/PRNP/GADD45B
SMIRNOV_CIRCULATING_ENDOTHELIOCYTES_IN_CANCER_UP	157	0.437847	2.01371	0.00023872	0.00110632	0.000523932	5343	tags=29%, list=11%, signal=26%	ACSL1/ANPEP/UPB1/CLU/AQP9/PROS1/CYP27A1/ABCA1/CD14/CD1D/DHRS3/PLIN2/IGFBP3/FBP1/SLC23A2/SC5D/CDA/CYP1A1/HNMT/MARCO/APOB/MYLK/INSIG1/EPAS1/SCML1/TNS1/CTSL/CHKA/ENG/ZNF395/NRG1/TNFRSF1A/ABCB1/RRAGD/CTSB/TNFRSF1B/SMAD7/DPH1/DSE/TMBIM1/CEBPB/HMOX1/ULK1/SLC22A4/MPP1
REACTOME_CLASS_I_PEROXISOMAL_MEMBRANE_PROTEIN_IMPORT	20	0.660539	2.01334	0.000450248	0.00178292	0.000844363	10018	tags=65%, list=20%, signal=52%	ACBD5/ALDH3A2/PEX14/PXMP2/PEX3/ABCD3/PEX19/PEX16/PEX12/PEX26/ABCD1/ATAD1/PEX13
PID_VEGFR1_PATHWAY	26	0.6196	2.01326	0.000675371	0.00250962	0.00118852	10402	tags=65%, list=21%, signal=52%	PRKCA/SHC2/PRKACA/PIK3R1/NRP1/NOS3/PTPN11/AKT1/PIK3CA/VEGFB/PRKCB/NCK1/MAPK1/PDPK1/VEGFA/NRP2/CD2AP
COATES_MACROPHAGE_M1_VS_M2_DN	78	0.490901	2.0126	0.000229463	0.00110632	0.000523932	8539	tags=41%, list=17%, signal=34%	ANG/LBP/F10/ARG1/F7/TJP2/RRAS2/PINK1/XDH/AK4/IGHM/CD5L/ALDOC/BNIP3/LIN7C/IGF2R/C1QC/MGST2/PTGER2/RIMBP2/SCD/IL18BP/C1QB/PKDCC/SOAT1/ITGB3/MYO1F/RPGRIP1/CBLB/CD300LF/PDXDC1/EFHD2
REACTOME_METABOLISM_OF_COFACTORS	19	0.667628	2.01196	0.000447027	0.00178292	0.000844363	10191	tags=74%, list=20%, signal=59%	GCH1/IDH1/PDSS2/GCHFR/COQ9/NOS3/CALM1/AKT1/SPR/DHFR/COQ5/PTS/COQ2/COQ3
DURCHDEWALD_SKIN_CARCINOGENESIS_DN	257	0.409878	2.01019	0.000248016	0.00110632	0.000523932	8902	tags=39%, list=18%, signal=33%	COBLL1/AQP3/CAT/ACOX1/XDH/HDAC6/ATP13A3/FAM83G/MET/AKR1D1/FETUB/CADM1/PLD1/PHLDB2/MED13/CDC40/RUSC2/APLP2/BLCAP/DCUN1D3/IQCJ-SCHIP1/QKI/RFNG/TMX3/RIPK1/MYO5B/KIF1B/ELL2/TMEM47/IRS2/NRG1/PLPP6/MAP4K4/AC026470.1/AGPS/TPP1/CRYBG3/SLPI/ARNT/SHROOM3/USF3/HOOK1/GPAT3/EEA1/UBAP1/OGA/PHLDA1/SMAD7/RIPK4/FCHSD2/LETMD1/EPS8/ENTR1/HMOX1/UBL3/CAST/TMEM106B/CPEB4/TIPARP/NFE2L2/GIT2/CCNG1/CREBBP/TATDN2/DIP2B/ES…
ENK_UV_RESPONSE_KERATINOCYTE_DN	481	0.384097	2.00954	0.000264061	0.00110905	0.000525229	11039	tags=40%, list=22%, signal=31%	LPCAT3/ACADM/MT1H/MIA2/KLF9/FMR1/TJP2/IMPA1/GNE/DHRS3/MAOA/CPOX/RDX/GOT1/SORL1/MTHFD1/MTMR4/GBE1/ACADSB/RAB14/ADH5/PPP1R3C/MAN2A1/MSMO1/IRS1/SMAD4/RBFOX2/CAMKK2/GCSH/UBE4A/SEC24B/MALT1/ERCC5/SLC31A1/AUH/FKBP5/SP100/SMARCA1/CXADR/PEX3/PGRMC2/VSNL1/STAU1/GOLGA8A/TPST2/BAIAP2/TACC1/PRRG1/ITSN1/ID1/ELAC2/NRG1/CRADD/ITSN2/ROCK2/TNFRSF1A/IFIT1/GCAT/AGPS/SDHD/SMARCA2/SLC16A1/PYROXD1/CYP51A1/CUL1/GOLGA4/…
VANDESLUIS_COMMD1_TARGETS_GROUP_3_UP	81	0.48541	2.0091	0.000228885	0.00110632	0.000523932	5668	tags=38%, list=11%, signal=34%	AMN/SLC39A5/SCARB1/CGNL1/CCDC198/APOC1/MYO7A/GRHPR/SPP2/APOA2/LSR/CTSZ/CLDN2/GALK1/REEP6/TRIM25/TF/APOA4/SHMT2/ALDOB/RNASE4/AASS/TM4SF5/CAMSAP3/CBX7/PKP2/AFP/PLEKHA2/PDZK1/PFKL/CCNG1
PEREZ_TP53_AND_TP63_TARGETS	208	0.420298	2.00874	0.000246853	0.00110632	0.000523932	7410	tags=35%, list=15%, signal=30%	COL18A1/IGF2/CAPN3/PLIN4/MAF/AQP3/GPT2/PALMD/DOK4/SHANK3/EPB41L4B/ABHD6/CNKSR3/DHRS3/CGNL1/PLPP3/TNFRSF10D/KLHL21/IGFBP3/INSR/IHH/ZCCHC24/SELENOP/RORA/GPR37/VASN/MAN1C1/MAFB/PLCXD2/RASSF5/ADCY1/SMAD6/CX3CL1/TACC1/GRTP1/ZFYVE1/ITSN2/SERINC5/GRK5/EPB41/SPATA13/MX1/GOLGA6L5P/COL27A1/ID2/STOX2/OGA/SMAD7/UBE2QL1/GNA11/BMP2/TM7SF2/NGFR/VSIR/ULK1/KSR1/NTN1/FOXF1/BTBD11/TAF5/GOLGA2P5/CELF2/ADAP2/TRIM8/NL…
TIAN_BHLHA15_TARGETS	16	0.699755	2.00807	0.000445236	0.00178292	0.000844363	8863	tags=69%, list=18%, signal=57%	AQP3/FNDC3A/ARRDC3/MPC1/ACP2/SLC31A2/FIGN/C2orf88/MINDY1/DISP1/MAP2K5
MYLLYKANGAS_AMPLIFICATION_HOT_SPOT_8	12	0.760847	2.0062	0.000449944	0.00178292	0.000844363	9644	tags=83%, list=19%, signal=67%	FANCC/FNBP1/ABL1/XPA/NUP214/TSC1/SYK/PTCH1/CNTRL/NR4A3
SCHAEFFER_PROSTATE_DEVELOPMENT_AND_CANCER_BOX1_UP	14	0.728355	2.00616	0.000448632	0.00178292	0.000844363	5557	tags=50%, list=11%, signal=44%	TLE1/PTGR1/HADH/SMARCA2/BSDC1/EIF2AK2/NFIX
ROZANOV_MMP14_TARGETS_DN	34	0.579532	2.00532	0.000225479	0.00110632	0.000523932	3666	tags=29%, list=7%, signal=27%	SNTB1/MAF/MT2A/ZDHHC14/SIGIRR/HELZ2/ZHX3/PIK3R1/IL13RA2/SDC4
VANASSE_BCL2_TARGETS_UP	30	0.595255	2.00496	0.000222767	0.00110632	0.000523932	7088	tags=50%, list=14%, signal=43%	SERPING1/PON3/CFB/APOA2/IGHM/KNG1/MBNL2/RELN/IL1RN/SLPI/LIFR/SRP54/JCHAIN/CCR9/CWC22
SENESE_HDAC3_TARGETS_UP	490	0.382604	2.00466	0.000265111	0.00110958	0.000525477	10457	tags=39%, list=21%, signal=31%	GCH1/ERRFI1/STEAP3/MYO1B/TRPM8/PDK4/HHIP/IL1RAP/LEPR/DST/MAN1A1/ATP13A3/AKR1C3/NNMT/MET/ACOX2/RAB43/KYNU/ITPRID2/AADAC/AKR1C1/ZBTB20/CLCN5/HNMT/LMAN1/IQGAP2/SLC25A15/PTPRB/PLD1/PHLDB2/MAPK14/ANTXR2/GPHN/JMJD1C/ROBO4/SPTBN1/DOCK4/DEPP1/CXADR/PPTC7/MBNL2/BACH1/ETS2/CAMK2D/TMEM30A/TMEM259/HTRA1/NAMPT/SAT1/ZNF697/GRB10/IGF2R/SCARB2/PDGFC/OTUD4/IFIT2/SAA1/TNFRSF10B/IFIT1/ENHO/FAS/SRD5A1/IFIT3/KDM7A/CT…
KEGG_AMINO_SUGAR_AND_NUCLEOTIDE_SUGAR_METABOLISM	43	0.549821	2.00442	0.000227428	0.00110632	0.000523932	8143	tags=42%, list=16%, signal=35%	GALT/UGP2/PGM1/GNE/GALK1/GNPNAT1/CYB5R3/HK3/NPL/PMM1/CMAS/GALE/PGM3/GMDS/UGDH/GCK/HEXA/GALK2
REACTOME_TRANSPORT_OF_ORGANIC_ANIONS	12	0.759951	2.00383	0.000449944	0.00178292	0.000844363	7108	tags=67%, list=14%, signal=57%	SLCO2B1/SLCO1B3/SLC16A2/SLCO1B1/ALB/SLCO1A2/SLCO4C1/SLCO3A1
REACTOME_THE_CANONICAL_RETINOID_CYCLE_IN_RODS_TWILIGHT_VISION	23	0.63477	2.00333	0.00044964	0.00178292	0.000844363	1531	tags=39%, list=3%, signal=38%	RDH16/HSD17B6/RDH10/CYP4V2/RDH5/MYO7A/NAPEPLD/RBP4/TTR
KEGG_MATURITY_ONSET_DIABETES_OF_THE_YOUNG	25	0.622554	2.00304	0.000899281	0.00318295	0.00150739	1981	tags=44%, list=4%, signal=42%	HNF4A/PKLR/HNF1A/FOXA3/NR5A2/ONECUT1/HNF4G/HHEX/FOXA2/INS/SLC2A2
KEGG_PRION_DISEASES	35	0.574011	2.00236	0.000226091	0.00110632	0.000523932	6205	tags=46%, list=12%, signal=40%	C5/MAP2K1/C8G/C8B/C8A/C9/FYN/C6/PRKACA/HSPA5/C1QC/SOD1/NOTCH1/PRNP/C7/C1QB
REACTOME_SCAVENGING_BY_CLASS_A_RECEPTORS	19	0.664421	2.00229	0.000894055	0.00318295	0.00150739	3944	tags=47%, list=8%, signal=44%	APOE/MASP1/MARCO/APOA1/APOB/CALR/HSP90B1/FTL/COLEC11
YAGI_AML_WITH_T_8_21_TRANSLOCATION	364	0.392576	2.0021	0.000255167	0.00110632	0.000523932	9530	tags=34%, list=19%, signal=27%	AGXT/PROZ/ALDH5A1/FZD5/CDH2/UGP2/SORD/IL1RAP/FURIN/MAN1A1/GNE/GALNT2/OSBP/ELMO1/TFPI/APOOL/SORL1/AKR1C3/ARID4A/ZC3H13/ACOT13/ACSM3/ACADSB/CLINT1/PEBP1/AK4/APOB/ASGR2/ITIH1/AGPAT2/GGCX/ADK/TGOLN2/SCML1/AKAP2/PIK3R1/STAT5B/CALR/ACP2/STIM1/TMBIM6/TEK/TNFRSF1A/DDT/MGMT/SEC62/EPB41/NT5C2/CDH19/UBA7/PSD3/MYRF/NFRKB/ENOSF1/ITM2B/ADNP2/SLC25A1/CSK/TTC28/JAK1/TSPAN7/PTGER2/DGAT1/CEP162/NUP214/PSMD12/SLC35…
LE_EGR2_TARGETS_DN	104	0.46366	1.99982	0.000232666	0.00110632	0.000523932	8747	tags=42%, list=17%, signal=35%	MPDZ/SERPIND1/ERRFI1/MYO1B/ZBTB16/CAT/GJB1/THRSP/PCYT2/MT2A/PCK1/MSMO1/TMEM56/AK3/ELOVL6/NRBP2/LSS/PIK3R1/NACC2/TMEM30A/MBP/ABCB1/CMTM6/GNAI1/SEMA6C/CLDN5/ABCA2/CYP51A1/SLC25A1/CERS2/GLOD4/TIPARP/FAAH/CPEB2/ADAM10/SLCO3A1/UTRN/RNF13/SIRT2/FGL2/HMGCS1/CHST2/IL16/FADS1
BIOCARTA_AT1R_PATHWAY	27	0.610274	1.99861	0.000678119	0.00251082	0.00118908	9448	tags=59%, list=19%, signal=48%	AGT/MAP2K1/EGFR/PRKCA/AGTR1/PTK2B/RAF1/GNAQ/SOS1/CALM1/MAPK8/PRKCB/MAP2K2/ATF2/MAPK1/ELK1
ZHAN_MULTIPLE_MYELOMA_LB_DN	39	0.56045	1.99667	0.00022941	0.00110632	0.000523932	11767	tags=69%, list=23%, signal=53%	ZC3H12C/STAT2/MAN1C1/XAF1/AKNA/TACC1/IFIT5/LY6E/SMAD1/DDX60/DUSP6/RTP4/IFI35/RSAD2/PARP8/STAT1/PTPRCAP/LYSMD2/WIPF1/USP18/LINC00869/MX2/CASP4/GTPBP1/IRF1/SEPHS1/IFI6
REACTOME_TOLL_LIKE_RECEPTOR_TLR1:TLR2_CASCADE	97	0.468678	1.99601	0.000232775	0.00110632	0.000523932	10431	tags=49%, list=21%, signal=39%	MAP2K1/PPP2R1B/CD14/IRAK2/MAPK14/SIGIRR/RPS6KA3/NKIRAS1/IKBKG/SAA1/SFTPD/MEF2A/CUL1/TIRAP/MAP2K3/MYD88/TLR4/ECSIT/PELI2/MAP3K7/NKIRAS2/DUSP6/IRAK4/DUSP3/RELA/IRAK3/AGER/PPP2CB/MAP2K7/TAB1/TAB2/RPS6KA2/MAPK8/MAP2K6/MEF2C/NFKBIB/PELI1/TAB3/PPP2R5D/ATF2/VRK3/MAPK1/ELK1/TLR2/CD36/DUSP7/TLR1/TRAF6
ZHONG_SECRETOME_OF_LUNG_CANCER_AND_FIBROBLAST	125	0.448405	1.99557	0.000234632	0.00110632	0.000523932	6127	tags=31%, list=12%, signal=27%	COL18A1/C2/CLU/HGFAC/CFB/IMPA1/NUCB1/GOT1/P4HB/CTSZ/CD81/SERPINC1/AHSG/ECM1/TF/APOH/LGALS4/ITIH2/CALR/CX3CL1/CP/TNXB/GSTO1/LAP3/ENO3/HSP90B1/FUCA1/CTSB/SDC4/TINAGL1/VCAM1/GLOD4/FN1/BGN/PNP/GSTM1/EEF2/ENPP2/PRDX6
BIOCARTA_PAR1_PATHWAY	19	0.662135	1.9954	0.000894055	0.00318295	0.00150739	8759	tags=58%, list=17%, signal=48%	PRKCA/PTK2B/F2/PIK3R1/ADCY1/GNAQ/MAP3K7/ARHGEF1/PIK3CA/ROCK1/PRKCB
BOYAULT_LIVER_CANCER_SUBCLASS_G6_UP	66	0.503397	1.99459	0.000228519	0.00110632	0.000523932	9330	tags=48%, list=19%, signal=40%	SLC13A3/ACSS3/MME/NPR2/HSDL2/SEPT4/VSNL1/MERTK/CEMIP2/MARCH8/CRYZ/CBR1/SLC6A2/ITPR2/GGH/LPIN1/SLC22A4/THSD1/RNF43/EFR3A/GREB1/PREB/UGGT1/PANX1/ASPSCR1/MLEC/HEXA/GALNT1/CTNNBL1/C1QTNF3/YPEL1/ATP6V0E2
PICCALUGA_ANGIOIMMUNOBLASTIC_LYMPHOMA_DN	136	0.44182	1.99438	0.000237417	0.00110632	0.000523932	10511	tags=42%, list=21%, signal=33%	AC129492.1/GADD45A/GABARAPL1/PTP4A1/SLC30A1/DUSP10/SIK3/JMJD1C/IKZF5/PNPLA8/NAMPT/IRS2/EIF5/FBXO33/IFRD1/ZFAND5/ID2/TUBB2A/RNF11/COG3/CLK1/KLF10/ZFAND2A/TIPARP/SRSF5/SETD2/LINC-PINT/PRNP/GADD45B/ZBTB10/CCNL1/RNF103/TOB1/TMX4/JMY/SARAF/ETNK1/BTG1/HECA/EPC1/SIK1/TTC7A/CNOT6L/ZFP36/MCL1/PELI1/C16orf72/FBXW7/ING3/WIPF1/PCIF1/NR4A3/TNFAIP3/RSRC2/G3BP2/PTGER4/SBDS
UEDA_CENTRAL_CLOCK	86	0.477105	1.99409	0.000231107	0.00110632	0.000523932	6006	tags=34%, list=12%, signal=30%	AVPR1A/DHODH/AC129492.1/GADD45A/ARNTL/PPP1R1A/SMPDL3A/RORA/MAN2A1/BCKDHB/TPRG1L/BLCAP/HERPUD1/CMBL/TMEM30A/DUSP1/HSPA5/PLEKHA1/CXCL12/STAT3/ID2/SOX7/NR1D2/GADD45B/NFIL3/POLR2E/TUBA8/PDIA6/CDK2AP2
GARGALOVIC_RESPONSE_TO_OXIDIZED_PHOSPHOLIPIDS_YELLOW_UP	32	0.58322	1.9931	0.000447728	0.00178292	0.000844363	5023	tags=38%, list=10%, signal=34%	OSGIN1/GCLC/GK/DIPK2A/SGMS2/GCLM/KDM7A/ATXN7/PPP3R1/HMOX1/NUP153/CHIC2
LENAOUR_DENDRITIC_CELL_MATURATION_DN	130	0.444884	1.993	0.000235018	0.00110632	0.000523932	6046	tags=26%, list=12%, signal=23%	SDC2/ANPEP/IL6R/SERPINF1/CXCL2/CES1/C3/CD14/SORL1/FBP1/KYNU/STAB1/AKR1C1/PTK2B/GK/CD163/SERPINA1/PPIF/HTRA1/NAMPT/NCOA4/IRF7/ITGAL/LGMN/TNFRSF1B/CSF1R/BRD2/NUP214/PLSCR1/FYB1/IL1R2/SOD2/TXNIP/DUSP6
REACTOME_FOXO_MEDIATED_TRANSCRIPTION_OF_OXIDATIVE_STRESS_METABOLIC_AND_NEURONAL_GENES	30	0.591529	1.99241	0.000222767	0.00110632	0.000523932	5769	tags=40%, list=11%, signal=35%	CAT/FOXO1/ABCA6/PCK1/SMAD4/INS/PPARGC1A/NR3C1/G6PC/IGFBP1/FOXO3/SOD2
REACTOME_ZBP1_DAI_MEDIATED_INDUCTION_OF_TYPE_I_IFNS	21	0.645579	1.99175	0.000225785	0.00110632	0.000523932	8487	tags=52%, list=17%, signal=44%	DTX4/NKIRAS1/RIPK1/IKBKG/MYD88/TICAM1/NKIRAS2/RELA/TLR3/NFKBIB/IRF3
REACTOME_ERYTHROPOIETIN_ACTIVATES_PHOSPHOINOSITIDE_3_KINASE_PI3K	12	0.755197	1.9913	0.000449944	0.00178292	0.000844363	8192	tags=75%, list=16%, signal=63%	PIK3R1/IRS2/PIK3CD/LYN/EPOR/GAB1/PIK3R5/PIK3CA/JAK2
IVANOVA_HEMATOPOIESIS_MATURE_CELL	286	0.401257	1.99108	0.000250501	0.00110632	0.000523932	9097	tags=37%, list=18%, signal=31%	ACSL1/UPB1/PQLC1/CES1/C3/EGFR/GOLIM4/C1S/MTSS1/SLC30A10/PC/CD14/LRRC28/GADD45A/LRG1/FN3K/ST3GAL6/RAB43/HECTD1/LYVE1/KLF11/TMEM56/TMEM170A/GUCD1/TPRG1L/PAQR9/RIOK3/NR3C1/TAPT1/STAB2/NINL/TM4SF4/STX2/PI4K2B/HAGH/LMTK2/CHP1/C11orf24/MARCH8/SLC40A1/LAMP1/SERINC5/ST3GAL5/ATP6V0A1/NAAA/SLC25A44/STRADB/KDM7A/CTSB/IL33/FAM126A/SLC16A1/ZNF740/LGMN/NUDT4/ETFRF1/HEBP1/AP2A2/MRC1/SLC22A23/LILRB3/USP32/PPP3R1…
KEGG_LEUKOCYTE_TRANSENDOTHELIAL_MIGRATION	116	0.452781	1.99079	0.000233263	0.00110632	0.000523932	8759	tags=39%, list=17%, signal=32%	CLDN1/CLDN14/VAV2/CLDN23/PRKCA/CTNNA3/PTK2B/CLDN2/MAPK14/PLCG2/RAPGEF4/CLDN15/PIK3R1/RASSF5/CLDN22/OCLN/ROCK2/CDH5/AFDN/GNAI2/GNAI1/CLDN20/CLDN16/CLDN5/CXCL12/ITGAL/ESAM/VCAM1/TXK/ARHGAP5/PIK3CD/SIPA1/PTPN11/PIK3R5/CTNND1/CD99/PXN/PIK3CA/ITGB2/BCAR1/ARHGAP35/ITGA4/MSN/ROCK1/PRKCB
REACTOME_TRANSPORT_OF_BILE_SALTS_AND_ORGANIC_ACIDS_METAL_IONS_AND_AMINE_COMPOUNDS	86	0.476262	1.99056	0.000231107	0.00110632	0.000523932	3671	tags=29%, list=7%, signal=27%	SLC13A5/SLC22A1/SLC39A14/SLC6A1/SLC39A5/SLC22A3/SLC41A2/SLC6A13/SLC47A1/SLC30A10/SLC13A3/SLC6A12/SLC30A1/SLC22A7/RSC1A1/SLC31A1/RHBG/CP/SLC40A1/SLC39A8/SLC22A18/SLC5A3/SLC6A2/SLC44A1/SLC16A1
ZHOU_INFLAMMATORY_RESPONSE_LPS_UP	400	0.387277	1.99	0.000258131	0.00110632	0.000523932	5827	tags=27%, list=12%, signal=24%	ADORA2A-AS1/ACSL1/UPB1/ATP2B2/HAL/TMPRSS6/GPLD1/HS3ST3B1/CLDN1/MFSD2A/CXCL2/MBL1P/G0S2/SLC28A1/IL27/DMRTA1/SULT1E1/IGF2-AS/CNTLN/ZC3H12C/TEC/PLPP3/RAPGEF2/ATP11C/RDX/IL1R1/IGFBP3/SEC14L4/GLYATL1/CCL23/GYS2/AKAP1/DNASE1L3/ARL4D/FOXP2/IYD/STBD1/SIK3/CYP3A7/RAPH1/IRAK2/RPS2P45/FZD4/CCL15/NBR2/NRAP/HELZ2/ADH1B/CYP7A1/UBE2FP1/HERC5/AKAP2/SHD/C22orf15/RIPK1/KIF1B/RCN3/NAMPT/COBL/PDLIM5/AL162171.1/SLC1A…
MIKKELSEN_MEF_LCP_WITH_H3K4ME3	127	0.445472	1.98955	0.000234247	0.00110632	0.000523932	7686	tags=36%, list=15%, signal=31%	SARDH/OSGIN1/SERPINF1/ECM2/SEC16B/TMEM176B/CYP2C8/TMEM176A/RDH5/XDH/MYO7A/MASP1/NNMT/RAB43/ECM1/TNS2/PCOLCE/TEF/RNF123/XAF1/AKNA/CP/TAPBPL/MRGPRF/KIAA1671/ARAP1/IL1RN/HGF/SOAT2/IL17RC/COL6A1/TLR4/TNFRSF14/LPIN3/EMILIN1/GSTM1/PHYHD1/C1QTNF6/ANGPTL2/TREX1/IL18RAP/FHL1/SH3KBP1/IFI35/SNX10/PKIG
CHYLA_CBFA2T3_TARGETS_UP	371	0.389571	1.98949	0.000254777	0.00110632	0.000523932	7341	tags=33%, list=15%, signal=28%	BACE1/MOGAT2/TTPA/KLKB1/H6PD/SH3BGRL2/ASS1/C11orf54/GPT2/C1R/LBP/F10/CYP2C8/CFAP57/CIDEB/NR1H3/HSD11B1/PKD1L3/CYP2J2/MYO7A/HPGD/FBP1/RIN3/HP/IDH1/EIF4EBP2/SLC35B4/TTC39C/DSG1/CDA/SH3TC1/HNMT/ERN1/ALAS1/TF/F2RL2/TMOD1/PLCG2/MAN1C1/GOPC/SUN2/SPTBN1/DNMBP/DEPP1/RNF180/CLDN15/PPP1R3B/CALR/TMEM53/CEMIP2/SGMS2/GCHFR/PLEK2/NEK6/ID1/NRG1/GRIA3/TEK/TNFRSF1A/TNFRSF10B/HK3/P2RX7/PLEKHA1/PPM1K/AS3MT/NPL/CABL…
REACTOME_REGULATION_OF_BETA_CELL_DEVELOPMENT	42	0.548738	1.98892	0.000227169	0.00110632	0.000523932	7754	tags=50%, list=15%, signal=42%	HNF4A/PKLR/FOXO1/HNF1A/FOXA3/NR5A2/ONECUT1/HNF4G/AKT2/FOXA2/KAT2B/INS/SLC2A2/MAML3/HNF1B/NOTCH1/CREBBP/KAT2A/AKT1/EP300/GCK
REACTOME_PYRIMIDINE_CATABOLISM	12	0.754092	1.98838	0.000449944	0.00178292	0.000844363	1369	tags=50%, list=3%, signal=49%	UPB1/DPYS/NT5E/DPYD/AGXT2/UPP2
REN_ALVEOLAR_RHABDOMYOSARCOMA_DN	406	0.386571	1.98836	0.000260824	0.00110632	0.000523932	7848	tags=30%, list=16%, signal=26%	BACE1/CLU/MYO1B/SLC39A14/PXDC1/CAT/LRP1/EGFR/DOK4/C1S/NT5E/SPAG9/PLS3/PRKCA/GABARAPL1/PLPP3/ACADVL/NUCB1/TMED5/IGFBP3/SCP2/NNMT/P4HB/ITGA5/PGRMC1/IDH1/TRAM2/CD81/BMP1/RRBP1/LMAN1/ECM1/MAN2A1/EPHX1/MYLK/PCOLCE/EPAS1/SIDT2/AVPI1/APLP2/PTEN/NDEL1/MAN2B2/GRAMD2B/RFTN1/ENG/RCN3/IL13RA1/HTRA1/TPST2/ELL2/DUSP1/PDLIM5/STAT6/GSTO1/LAMP1/TXNDC5/PDGFC/NRG1/TNFRSF1A/EBP/CBR1/CMTM6/GNAI2/PLOD1/SEC24A/NDST1/CT…
REACTOME_RAF_ACTIVATION	30	0.59026	1.98813	0.000222767	0.00110632	0.000523932	10466	tags=60%, list=21%, signal=48%	MAP2K1/PPP2R1B/MAP3K11/CAMK2D/RAF1/ARAF/KSR1/BRAP/CALM1/PPP2CB/PPP2R5A/CAMK2B/JAK2/PPP2R5D/MAP2K2/PPP2R5E/MARK3/PPP2R5C
PID_UPA_UPAR_PATHWAY	41	0.550933	1.98805	0.000228415	0.00110632	0.000523932	3608	tags=27%, list=7%, signal=25%	GPLD1/LRP1/EGFR/FGG/FGA/FGB/ITGA5/VTN/PLG/HGF/CRK
REACTOME_GLUCOSE_METABOLISM	92	0.470038	1.98787	0.000230894	0.00110632	0.000523932	5605	tags=29%, list=11%, signal=26%	PFKFB1/SLC37A4/GCKR/PCK2/PKLR/PC/PPP2R1B/GOT1/FBP1/GOT2/SLC25A13/SLC25A10/NUP88/PCK1/ALDOB/ALDOC/G6PC/PRKACA/ENO3/HK3/FBP2/SLC25A1/NUP153/NUP214/PFKL/SLC25A11/POM121
MARKEY_RB1_CHRONIC_LOF_DN	117	0.451134	1.98733	0.000233481	0.00110632	0.000523932	8162	tags=39%, list=16%, signal=33%	APOE/EGFR/CD14/GABARAPL1/TEC/TFPI/PLIN2/HPGD/IGFBP3/STAB1/ACKR4/CCL23/CADM1/ZDHHC14/MCCC1/MSRB1/HTRA1/CP/CFP/PLAC8/PLA2G7/CTSS/SHROOM3/PLD3/C1QC/IRF5/SLC22A23/PON2/CSF1R/SKAP2/HMOX1/GJB3/PLSCR1/LCP2/C1QB/SARAF/LILRA5/ARL5A/IGFBP2/SLCO3A1/PSTPIP1/DCN/SEPT11/RPS6KA2/PTPRC/C1QA
REACTOME_DISEASES_ASSOCIATED_WITH_GLYCOSYLATION_PRECURSOR_BIOSYNTHESIS	18	0.670727	1.98708	0.000447327	0.00178292	0.000844363	5930	tags=39%, list=12%, signal=34%	GALT/PGM1/GNE/GALK1/NUS1/CTSA/GALE
BIOCARTA_HCMV_PATHWAY	17	0.68109	1.98558	0.000670092	0.00249737	0.00118271	9394	tags=59%, list=19%, signal=48%	MAP2K1/MAPK14/PIK3R1/MAP2K3/RELA/AKT1/PIK3CA/MAP2K6/MAP2K2/MAPK1
BOWIE_RESPONSE_TO_TAMOXIFEN	18	0.670087	1.98518	0.000447327	0.00178292	0.000844363	8694	tags=61%, list=17%, signal=51%	IFIT2/IFIT1/IRF7/IFIT3/MX1/IRF9/OAS2/IFI35/IFI16/IFNGR1/STAT1
KEGG_ONE_CARBON_POOL_BY_FOLATE	17	0.680888	1.98499	0.000670092	0.00249737	0.00118271	2473	tags=47%, list=5%, signal=45%	AMT/SHMT1/FTCD/ALDH1L1/MTHFD1/MTHFS/SHMT2/MTHFD2L
BIOCARTA_INSULIN_PATHWAY	21	0.643345	1.98486	0.000225785	0.00110632	0.000523932	7693	tags=43%, list=15%, signal=36%	MAP2K1/INSR/IRS1/PIK3R1/RAF1/SOS1/PTPN11/PIK3CA/MAPK8
BOGNI_TREATMENT_RELATED_MYELOID_LEUKEMIA_UP	31	0.585316	1.98457	0.000449236	0.00178292	0.000844363	3970	tags=35%, list=8%, signal=33%	SLC10A1/MAP2K1/MPST/HP/NPR2/EFNA2/RFNG/CFP/SEMA6C/EPB41/DNAJA2
HELLER_SILENCED_BY_METHYLATION_DN	107	0.457589	1.98432	0.000232612	0.00110632	0.000523932	6807	tags=37%, list=14%, signal=32%	CBS/ADGRA3/PSAT1/MAF/OSGIN1/MIA2/SLC47A1/INHBE/CTH/GOT1/IDH1/FAM149A/USH2A/PLG/SHMT2/TSHR/PPARGC1A/DNAJB9/PHGDH/DDAH1/TXNDC5/CEACAM1/HSP90B1/SLC5A3/HGF/TPP1/IFRD1/ADRB2/CRBN/CEBPB/HMOX1/CLK1/PPFIBP1/EPB41L2/TIMM44/ENPP2/JCHAIN/PGM3/SEC24D/SLCO4C1
MONTERO_THYROID_CANCER_POOR_SURVIVAL_DN	11	0.773399	1.98394	0.00135135	0.00449586	0.00212916	4068	tags=55%, list=8%, signal=50%	SH3BGRL2/PLPP3/APLP2/PDK2/LMBRD1/ORMDL3
KLEIN_PRIMARY_EFFUSION_LYMPHOMA_UP	50	0.528184	1.98379	0.000228833	0.00110632	0.000523932	9791	tags=46%, list=19%, signal=37%	CFI/GLDC/AQP3/ALDH1L1/CFHR4/PLPP3/IQGAP2/AGPAT2/SULT1A2/PLOD1/GANAB/IL2RB/DPY19L1/LTA4H/GUSB/RABGGTA/ATP2A2/NFIB/VARS/P4HA1/ZMYM3/VEGFA/CTRL
MOOTHA_GLYCOGEN_METABOLISM	21	0.642937	1.9836	0.000225785	0.00110632	0.000523932	5657	tags=48%, list=11%, signal=42%	SLC37A4/GCKR/GBE1/GYS2/PHKA2/GYG2/G6PC/PYGL/AGL/GAA
PEREZ_TP63_TARGETS	354	0.390049	1.98332	0.000254001	0.00110632	0.000523932	7583	tags=33%, list=15%, signal=29%	ACSL1/COL18A1/IGF2/CAPN3/PLIN4/CLU/MAF/PROC/ASS1/AQP3/GPT2/PALMD/DOK4/SHANK3/EPB41L4B/DGAT2/ABHD6/FOXN3/CFB/ATP11A/CNKSR3/TLE1/DHRS3/CGNL1/PLPP3/TNFRSF10D/PCYT2/KLHL21/LIMS2/IGFBP3/INSR/IHH/ZCCHC24/ELFN1/DLC1/GATA6/SELENOP/RORA/STBD1/GPR37/VASN/MAPK14/MAN1C1/MAFB/PLCXD2/MKX/ZFPM1/RCAN1/RASSF5/ADCY1/SMAD6/CYTH1/CX3CL1/TACC1/GRTP1/ZNRF3/CYGB/ST3GAL1/ZFYVE1/SLC39A8/ITSN2/SERINC5/GRK5/SLC6A2/SOBP/EPB…
REACTOME_ER_QUALITY_CONTROL_COMPARTMENT_ERQC	21	0.642826	1.98326	0.000225785	0.00110632	0.000523932	8994	tags=52%, list=18%, signal=43%	AMFR/SEL1L/EDEM1/OS9/RNF185/SYVN1/RNF103/MAN1B1/UGGT1/EDEM2/RNF5
KYNG_NORMAL_AGING_DN	18	0.669263	1.98274	0.000447327	0.00178292	0.000844363	5808	tags=56%, list=12%, signal=49%	MT1X/HSD17B4/IGFBP3/KDSR/LIG4/PTEN/HADH/IL17RB/TIMD4/PICALM
REACTOME_COBALAMIN_CBL_VITAMIN_B12_TRANSPORT_AND_METABOLISM	21	0.642252	1.98149	0.000225785	0.00110632	0.000523932	3595	tags=38%, list=7%, signal=35%	AMN/MMUT/MMAA/MMACHC/ABCD4/LMBRD1/MMAB/TCN2
REACTOME_NICOTINAMIDE_SALVAGING	19	0.65729	1.9808	0.000894055	0.00318295	0.00150739	8334	tags=74%, list=17%, signal=62%	CYP8B1/NAPRT/NNMT/PARP4/NAMPT/NAXD/PARP14/NUDT12/PTGIS/PARP9/RNLS/PARP16/PARP8/PARP10
KANG_DOXORUBICIN_RESISTANCE_DN	19	0.657201	1.98054	0.000894055	0.00318295	0.00150739	8342	tags=63%, list=17%, signal=53%	PSAT1/PCYOX1/WASHC4/WWP1/NFAT5/TMEM106B/NR1D2/TJP1/CEBPD/ASXL2/CLIC4/TBL1X
BRUECKNER_TARGETS_OF_MIRLET7A3_UP	107	0.456554	1.97983	0.000232612	0.00110632	0.000523932	6914	tags=35%, list=14%, signal=30%	EHBP1/ERRFI1/FGG/DAPK1/SMOC1/FGB/BCHE/GABARAPL1/CTH/TFPI/FGL1/LGR4/ACOX2/SLC23A2/SDHA/GFOD1/AKAP12/CXADR/PPTC7/SAT1/COL4A4/OS9/THSD7A/FAM107B/GLIS3/CDK6/USP32/PITPNC1/PON2/CPEB4/NFE2L2/EFNA1/USP9X/SLC38A2/ETNK1/BTG1/MFSD12
GHO_ATF5_TARGETS_UP	13	0.734374	1.97978	0.000673703	0.00250684	0.0011872	7206	tags=46%, list=14%, signal=40%	GPT2/ITIH3/ATP11B/ZNF658/IFT88/TAB2
SCHMIDT_POR_TARGETS_IN_LIMB_BUD_UP	26	0.609112	1.97918	0.000900495	0.00318295	0.00150739	4858	tags=46%, list=10%, signal=42%	FGL1/SC5D/MSMO1/INSIG1/MVK/ELOVL6/STARD4/LSS/CYP51A1/ACAT2/TM7SF2/CYP26A1
LINDGREN_BLADDER_CANCER_CLUSTER_1_UP	118	0.448949	1.97889	0.000234412	0.00110632	0.000523932	8734	tags=42%, list=17%, signal=34%	RXRA/FOXO1/ZADH2/FUBP3/FBP1/CDIP1/FAHD2A/RAB14/TMEM245/ERP44/BDH2/CBR4/TMOD1/PLD1/PIK3R1/PYGL/PHF3/NT5DC1/VPS13A/GSTO1/TSPYL1/DGLUCY/NMRK1/GNAI1/INTS10/PBX3/TBC1D4/PRXL2A/ZNF516/XPA/STX17/SKAP2/TOR1A/CAST/MAP3K7/ZMAT1/ESD/TMX4/BRD3/GSDME/CARNMT1/PNRC1/SNAPC3/TUBG2/IFI16/HOXA3/ZNF513/ZCWPW1/GALNT1
GRANDVAUX_IRF3_TARGETS_UP	14	0.718212	1.97822	0.000897263	0.00318295	0.00150739	7929	tags=71%, list=16%, signal=60%	F13B/PLCG2/NR3C1/IFIT1/IFIT3/IFI44/OAS2/AHNAK/GBP1/RSAD2
LU_EZH2_TARGETS_DN	395	0.385255	1.9778	0.000258264	0.00110632	0.000523932	8981	tags=35%, list=18%, signal=29%	ACSL1/ATRN/GRB14/CLDN1/ACO1/EGFR/AOC4P/ADGRG6/SLC16A10/ALDH6A1/ATP11C/IGFBP3/VWA8/SEPSECS/PLSCR4/NR2C1/MAN2A1/RAPH1/MYLK/RBFOX2/SULT1A1/SEC24B/SEC63/ELOVL6/SCML1/MGAT2/CXADR/PPTC7/CSNK2A2/GOLGA8B/DIPK2A/SATB2/TMX3/XIST/RASSF5/SH2B3/GRAMD2B/PI4K2B/RFTN1/IGFBP1/CALD1/ELL2/IRS2/DDAH1/N4BP2/TACC1/NHLRC3/MAGT1/NPL/SEC24A/CRK/ALPK2/TGFBR2/C6orf120/ANKRD17/BIRC2/HNF1B/CYFIP2/AMER1/ACVR1B/UBE2E3/PILRB/LI…
REACTOME_SIGNALING_BY_BMP	28	0.597151	1.97568	0.000675524	0.00250962	0.00118852	11030	tags=61%, list=22%, signal=47%	BMP10/SMAD4/GREM2/SMAD6/SKI/GDF2/SMAD7/BMP2/ACVR2B/SMAD1/ACVR2A/FSTL1/BMPR2/SMURF1/UBE2D3/SMAD9/AMHR2
LIU_VAV3_PROSTATE_CARCINOGENESIS_DN	17	0.677583	1.97536	0.000670092	0.00249737	0.00118271	3348	tags=35%, list=7%, signal=33%	PSAT1/CLU/C1R/TH/HSPA5/SYVN1
REACTOME_SIGNALING_BY_MODERATE_KINASE_ACTIVITY_BRAF_MUTANTS	45	0.536765	1.97351	0.000228258	0.00110632	0.000523932	9767	tags=53%, list=19%, signal=43%	MAP2K1/FGG/FGA/FGB/PEBP1/MAP3K11/CAMK2D/RAF1/APBB1IP/CSK/ARAF/FN1/KSR1/TLN1/ARRB2/BRAP/CALM1/ITGB3/CAMK2B/JAK2/MAP2K2/MAPK1/MARK3/ARRB1
REACTOME_INTERLEUKIN_15_SIGNALING	14	0.716371	1.97315	0.00112158	0.00381575	0.00180707	7505	tags=57%, list=15%, signal=49%	STAT5B/STAT3/IL15RA/JAK1/SOS1/IL2RB/STAT5A/SOS2
CHARAFE_BREAST_CANCER_LUMINAL_VS_MESENCHYMAL_DN	462	0.378443	1.97264	0.00026137	0.00110632	0.000523932	7353	tags=32%, list=15%, signal=28%	EHBP1/PROS1/CXCL2/EVA1A/EGFR/G0S2/C1S/NT5E/CFL2/DPYD/HSD17B11/SPAG9/ECHDC1/BCHE/ZC3H12C/GALNT2/PRKCA/GADD45A/FAM20C/TFPI/TNFRSF10D/ARHGEF40/ST3GAL6/AKR1C3/NNMT/MET/ITPRID2/ZCCHC24/ITGA1/SLC35B4/DIPK1A/TRAM2/CENPV/NUP88/CCDC82/TMEM245/PDE7B/SPRY2/F2RL2/MYLK/AKAP12/IRAK2/BIN1/CCDC50/PHLDB2/ANTXR2/INPP1/MALT1/SPATS2L/SPTBN1/EPHA2/NR3C1/AKAP2/NECTIN3/FAT4/QKI/EXTL2/FAM171A1/PYGL/STX2/NDEL1/BACH1/FST/…
ABRAHAM_ALPC_VS_MULTIPLE_MYELOMA_UP	26	0.606858	1.97186	0.000900495	0.00318295	0.00150739	7492	tags=42%, list=15%, signal=36%	APOE/IGFBP3/SERPINA1/A2M/TNFRSF1A/FAS/CXCL12/HMOX1/BCL6/CDKN1B/DCN
TERAMOTO_OPN_TARGETS_CLUSTER_1	14	0.715561	1.97092	0.00112158	0.00381575	0.00180707	5381	tags=64%, list=11%, signal=57%	IDH1/SC5D/INSIG1/LSS/BNIP3/GFOD2/ACTL6B/ERBB3/TMEM50B
DAZARD_UV_RESPONSE_CLUSTER_G6	145	0.4328	1.9708	0.000237812	0.00110632	0.000523932	6999	tags=37%, list=14%, signal=32%	DIO1/ADGRL2/FNDC3A/PHLPP1/FOXO1/PALM2-AKAP2/GNE/ATP13A3/MEGF9/FYN/FERMT2/IRS1/DOCK4/QKI/TLE4/INSIG2/CENPC/PHF3/DOP1A/EXPH5/SPOP/OTUD4/CLASP1/ABL1/CUL1/ARHGEF7/BIRC2/PIK3C3/TLK1/MAP3K5/PIKFYVE/ZNF638/SMC5/XPA/FOXO3/CHD9/KLF7/UBL3/ADCY9/AC118549.1/USP24/ORC2/MTUS1/CREB3L2/LARP7/CEBPD/TUT4/ZNF451/ZHX2/MLH3/WAPL/MEIS1/RRP1B
REACTOME_NEUTROPHIL_DEGRANULATION	477	0.376796	1.97026	0.000262743	0.00110632	0.000523932	9877	tags=34%, list=20%, signal=28%	ANPEP/ACAA1/METTL7A/SLC27A2/A1BG/VNN1/CAT/C3/ALAD/PGM1/ARG1/CD14/ATP11A/ORM1/LRG1/NAPRT/PGRMC1/HP/IDH1/AP1M1/ORM2/DIAPH1/CTSZ/DSG1/CDA/RAB14/STOM/MME/STBD1/AHSG/TTR/SURF4/IQGAP2/ERP44/AGPAT2/PTPRB/PLD1/MAPK14/CPPED1/ANO6/ALDOC/SERPINA1/HRNR/SIRPA/PYGL/CREG1/TOLLIP/TMEM30A/CYB5R3/CFP/UBR4/MGST1/IGF2R/SIGLEC9/LAMP1/TXNDC5/ARSB/RAB37/NHLRC3/HK3/PLAC8/CEACAM1/FUCA1/ATP6V0A1/MAGT1/CMTM6/CTSS/GALNS/CTS…
SA_PTEN_PATHWAY	17	0.675777	1.97009	0.000670092	0.00249737	0.00118271	9416	tags=59%, list=19%, signal=48%	PTK2B/AKT2/PTEN/RBL2/SOS1/PIK3CD/AKT1/PIK3CA/MAPK1/PDPK1
GRABARCZYK_BCL11B_TARGETS_UP	81	0.475753	1.96913	0.000228885	0.00110632	0.000523932	7673	tags=42%, list=15%, signal=36%	ZBTB16/RDX/TRAM2/AK4/USO1/TPRG1L/RPS6KA3/NUS1/PIK3R1/BNIP3/ID1/SCARB2/GSAP/AGPS/PRF1/ID2/ITGB7/JAK1/RAB27A/BICD2/IL2RB/AHNAK/TOR1AIP2/LINC00888/MREG/NKG7/C5orf56/PPIP5K2/IGLC2/PEX26/AASDHPPT/TNFSF10/ANKRD46/MAPK6
PID_EPHRINB_REV_PATHWAY	30	0.584524	1.96881	0.0006683	0.00249737	0.00118271	7958	tags=50%, list=16%, signal=42%	FGG/FGA/FGB/FYN/EFNB1/PIK3R1/FGR/BLK/MAP3K7/LYN/PIK3CA/ITGB3/TIAM1/MAPK8/EPHB4
IZADPANAH_STEM_CELL_ADIPOSE_VS_BONE_UP	128	0.439973	1.96772	0.000234082	0.00110632	0.000523932	7104	tags=33%, list=14%, signal=28%	ACSL5/MAF/MT1X/GOLIM4/MTSS1/ABCB4/MT1F/KYNU/MT2A/ELOA/NUP88/MT1G/SH3TC1/PTGR1/MAPRE2/ARHGAP24/QKI/CELF1/AIFM2/SATB2/TPST2/NEK6/PTPRK/LAP3/ENO3/ABCB1/HECW2/SOCS2/MAP3K5/TUBB2A/TCIRG1/HMOX1/LYN/ETS1/NID2/DUSP6/GSDME/GMDS/TREX1/SH3KBP1/HNRNPH1/BTN3A3
LIU_VMYB_TARGETS_UP	125	0.442141	1.9677	0.000234632	0.00110632	0.000523932	9362	tags=43%, list=19%, signal=35%	ETFDH/ERLIN1/MT1H/EPB41L4B/PHLPP1/PCOLCE2/FYN/STARD5/KLF11/ABCG2/MGAT2/SATB2/ABCD3/KLHDC2/ALDH7A1/SLC31A2/GRB10/NMRK1/SRD5A1/SOBP/PHF8/SEC24A/IMPA2/RNGTT/ALCAM/MPHOSPH9/RUFY3/IL17RB/CDC42EP1/PLSCR1/PPM1E/TNKS2/BAG2/DPYSL2/RETREG2/USP25/GNB5/HECTD4/SLCO3A1/CTNNAL1/ZNF318/CLIC4/NMI/RPS6KA2/KLHL7/CFAP20/ICAM3/BCR/TMPO/TRPV2/ARL4C/SBNO1/ZBTB1/PDE4DIP
LIU_CMYB_TARGETS_UP	164	0.424805	1.96707	0.000238834	0.00110632	0.000523932	7250	tags=35%, list=14%, signal=30%	ETFDH/ABTB2/ASS1/ABCC3/MT1X/MT1H/PHLPP1/MT1F/IGFBP4/PCOLCE2/MT2A/AKAP1/PEBP1/AK4/PCTP/EPHX1/STARD5/INSIG1/PDK2/DNAJB9/SATB2/KLHDC2/RAB11B/ALDH7A1/SAT1/SH2D4A/SPG7/ZNF395/SLC31A2/NMRK1/SERINC5/ECE1/SRD5A1/ZER1/IMPA2/SERPINA3/RNGTT/MPHOSPH9/IL17RB/CDC42EP1/WDR44/TIPARP/ARRB2/PPM1E/TOB1/TNKS2/ESYT1/SPG11/RETREG2/GREB1/USP25/ADD3/DLG1/HECTD4/SLCO3A1/CTNNAL1/ZNF318/SIK1
KONDO_EZH2_TARGETS	230	0.406496	1.96692	0.000248262	0.00110632	0.000523932	6012	tags=29%, list=12%, signal=26%	IL6R/ABCA5/HLF/EGFR/SCARB1/C1S/KLF9/NT5E/ELMO1/SAMD4A/TFPI/SORL1/HPGD/ST3GAL6/ACKR2/IGFBP3/NNMT/PLA2G12B/AOX1/ANO1/ANXA10/MGLL/RBP4/FOXA2/LMAN1/PCK1/GPC6/HSD17B2/MYLK/CCDC50/ANTXR2/ACAD8/DOCK4/RNASE4/ELOVL2/PPP1R3B/MYO16/IL13RA1/CP/RNPC3/ST3GAL1/IFIT2/TRIM2/RRAGD/MAGT1/IFIT3/GALNS/AKAP13/PYROXD1/ZEB1/SNORC/NRP1/ID2/TMTC1/SCN2A/NAV2/TTC28/TNRC6B/DPF3/CFDP1/ARHGAP5/SLC2A10/GBA2/VPS13C/GNA14/C18orf2…
YANG_BREAST_CANCER_ESR1_LASER_DN	47	0.529921	1.96588	0.000228154	0.00110632	0.000523932	7441	tags=40%, list=15%, signal=34%	PLS3/CYP39A1/ST3GAL6/BBOX1/IFNAR2/PLD1/SEC63/MCCC1/SMCO4/TCF7L2/IFRD1/ACAT2/MPP6/SOS1/PRNP/SERBP1/FNDC3B/RRP1B/PRKD3
MCLACHLAN_DENTAL_CARIES_UP	264	0.400224	1.96585	0.000250188	0.00110632	0.000523932	11661	tags=46%, list=23%, signal=35%	ACSL1/ANPEP/CFI/SLC46A3/APOE/AQP3/C3/LBP/MT1X/G0S2/ABCA1/CD14/CFB/ORM1/CD1D/APOC1/IGFBP4/SORL1/NNMT/KYNU/STAB1/MT2A/CYP1A1/MT1G/C4A/IGHM/CD4/DEPP1/CD163/SERPINA1/IL13RA1/NAMPT/SAT1/BLNK/CCL18/SAA1/PLAC8/SELE/PLA2G7/IL1RN/CTSS/CTSB/CXCL12/SLPI/SERPINA3/IRF8/IGFLR1/IGKV1D-13/TNFRSF1B/CPVL/MRC1/VCAM1/IL10RA/CSF1R/SKAP2/FCGR2B/GPNMB/DDX3Y/IGHG1/LYN/FYB1/NFIL3/IGKC/SOD2/CEBPD/LCP2/IGKV3-20/C1QB/JCHAIN…
BIOCARTA_LONGEVITY_PATHWAY	15	0.700243	1.96575	0.000897263	0.00318295	0.00150739	7009	tags=60%, list=14%, signal=52%	GHR/CAT/IGF1/PIK3R1/FOXO3/SOD1/SOD2/AKT1/PIK3CA
REACTOME_GLYCOGEN_METABOLISM	27	0.600025	1.96504	0.000678119	0.00251082	0.00118908	6000	tags=44%, list=12%, signal=39%	UGP2/PGM1/GBE1/GYS2/PHKA2/PPP1R3C/GYG2/PYGL/AGL/GAA/CALM1/PHKB
REACTOME_DISEASES_OF_IMMUNE_SYSTEM	24	0.615474	1.96337	0.0011241	0.00381575	0.00180707	12768	tags=67%, list=25%, signal=50%	CD14/IKBKG/TIRAP/MYD88/TLR4/TICAM1/UNC93B1/IRAK4/RELA/TLR3/TLR2/CD36/TLR1/BTK/NFKBIA/TLR6
ZHAN_MULTIPLE_MYELOMA_CD1_VS_CD2_UP	68	0.492504	1.9631	0.00022899	0.00110632	0.000523932	3750	tags=25%, list=7%, signal=23%	DMGDH/ATF5/ASS1/PCK2/HS3ST3B1/GPT2/G0S2/MIA2/CPNE8/INHBE/STOM/SETD7/SESN2/PHGDH/HADH/P2RX7/ITGAL
REACTOME_TIGHT_JUNCTION_INTERACTIONS	30	0.582452	1.96183	0.0006683	0.00249737	0.00118271	3575	tags=33%, list=7%, signal=31%	CLDN1/CLDN14/CLDN23/CLDN2/CLDN15/CLDN22/PARD3/CLDN20/CLDN16/CLDN5
BIOCARTA_MTOR_PATHWAY	22	0.628612	1.96127	0.00112233	0.00381575	0.00180707	9416	tags=59%, list=19%, signal=48%	SHLD2P3/PDK2/PIK3R1/PTEN/MTOR/MKNK1/TSC1/EIF4G1/AKT1/PIK3CA/EIF3A/RPS6KB1/PDPK1
SANA_TNF_SIGNALING_UP	83	0.472423	1.96086	0.000231054	0.00110632	0.000523932	6850	tags=39%, list=14%, signal=33%	LIPG/CXCL2/APOL1/C1S/HSD17B11/SPAG9/ATP13A3/PLA1A/KIAA1147/CX3CL1/SAT1/C1QTNF1/HLA-E/IFIT1/IFIH1/MX1/CMPK2/TNIP1/PARP14/VCAM1/TAPBP/APOL3/OAS2/SOD2/DDX60/IL32/SLC15A3/IFI44L/SAMHD1/BIRC3/GBP1/HLA-A
LIM_MAMMARY_LUMINAL_MATURE_DN	94	0.461724	1.96032	0.000231	0.00110632	0.000523932	6370	tags=37%, list=13%, signal=33%	APOE/AQP9/TSHZ2/EGFR/FOXO1/FOXN3/SORBS1/IGFBP3/AKAP2/FAM171A1/FAM13A/MERTK/TLE4/HTRA1/CALD1/NRTN/TMEM47/IRS2/CYGB/MEIS2/MAP4K4/FAS/TPST1/FRMD4A/TINAGL1/COL6A1/LRIG3/FAM49A/BTBD11/HEY2/EPB41L2/C2orf88/ETS1/GAS6/DPYSL2
REACTOME_UNFOLDED_PROTEIN_RESPONSE_UPR	91	0.463897	1.95989	0.000230309	0.00110632	0.000523932	10589	tags=45%, list=21%, signal=36%	CREB3L3/PDIA5/ACADVL/ERN1/HERPUD1/EXTL2/DNAJB9/CALR/EDEM1/IGFBP1/HSP90B1/HSPA5/CXXC1/SYVN1/SRPRA/TPP1/DNAJC3/SULT1A3/CREBRF/ATF6/MBTPS1/SEC31A/TLN1/CEBPG/CREB3L2/TATDN2/PDIA6/KHSRP/MBTPS2/PREB/CTDSP2/HDGF/ADD1/EXOSC6/NFYC/HYOU1/YIF1A/ZBTB17/DIS3/CUL7/GOSR2
BIOCARTA_TNFR2_PATHWAY	17	0.672047	1.95922	0.000893455	0.00318295	0.00150739	9744	tags=59%, list=19%, signal=47%	RIPK1/DUSP1/IKBKG/MAP3K14/TNFRSF1B/TANK/RELA/ELP1/TRAF1/TNFAIP3
GRYDER_PAX3FOXO1_ENHANCERS_KO_DOWN	435	0.377793	1.95858	0.000259943	0.00110632	0.000523932	8320	tags=32%, list=17%, signal=27%	SDC2/ERRFI1/MAF/SLC46A3/ATRN/ASS1/SLC7A2/PCSK6/MFSD2A/SCARB1/DAPK1/PIPOX/KLF9/TUT7/TBX15/BCHE/GALNT2/GADD45A/SLC16A10/PROX1/TBC1D2B/PID1/ELMO1/SLC38A10/MET/ZC3H13/SMPDL3A/PARP4/TRAM2/SDC1/CLINT1/CD81/FGGY/ANKRD13A/RAPH1/DBT/PHLDB2/GPHN/MAN1C1/SPATS2L/ACTR3C/NR3C1/AKAP2/XRN1/PPP1R3B/QKI/PGRMC2/SFXN1/PEG3/SATB2/HACL1/COX11/RAPGEF1/NRG1/MEIS2/IL4R/TNFRSF10B/TSPAN9/MAP4K4/PCCB/CABLES1/BTD/CCNC/SMARCA…
SENESE_HDAC1_TARGETS_UP	451	0.376504	1.95785	0.000261028	0.00110632	0.000523932	11024	tags=41%, list=22%, signal=32%	IL6R/PSAT1/GCH1/ERRFI1/STEAP3/SLC39A14/COBLL1/C3/G0S2/SLC43A3/SCG5/ATP11A/AADACP1/MAOA/ALPL/TFPI/PLIN2/KLHL21/ATP13A3/MET/KYNU/HECTD1/ITPRID2/AADAC/AKR1C1/CYP1A1/TGM2/LMAN1/IRAK2/ANTXR2/ROBO4/LIG4/DOCK4/EPG5/CXADR/PPTC7/DNAJB9/CELF1/BACH1/IL13RA2/SGPP1/PPIF/TMEM259/NAMPT/DDAH1/MGST1/RESF1/DESI1/SLC39A8/OTUD4/SAA1/TNFRSF10B/SNX19/FAS/PCGF5/NAB1/FAM126A/MAP3K2/CSF2/SRPRA/SLC16A1/TPP1/LDB2/FKBP15/TG…
CERVERA_SDHB_TARGETS_2	113	0.445543	1.95539	0.000232019	0.00110632	0.000523932	2695	tags=25%, list=5%, signal=24%	MST1/ATP2B2/METTL7A/HS3ST3B1/FMO5/F5/IL1RAP/SCG5/LEPR/NT5E/PAH/CFB/GAS2/METTL7B/AGTR1/LINC02532/APOM/PCOLCE2/DDC/APOA1/TTR/TF/GFOD1/HOMER2/ELOVL6/PEG3/A2M/DUSP1
REACTOME_REGULATION_OF_FOXO_TRANSCRIPTIONAL_ACTIVITY_BY_ACETYLATION	10	0.782702	1.95433	0.00133393	0.00445054	0.0021077	10136	tags=90%, list=20%, signal=72%	FOXO1/KAT2B/SIRT1/FOXO3/CREBBP/TXNIP/EP300/SIRT3/FOXO4
TAKAO_RESPONSE_TO_UVB_RADIATION_DN	98	0.458275	1.95312	0.000234137	0.00110632	0.000523932	8663	tags=40%, list=17%, signal=33%	SLC39A14/ACAA2/CES1/G0S2/FOXO1/KANK1/PLIN2/ECHS1/ELOA/CLINT1/LSS/CAMK2D/RFTN1/TNFRSF1A/NNAT/PKN2/AARS/DHCR24/MKNK1/CAST/TJP1/TXNIP/CEBPD/ESD/NOP14/ATXN2/RAD23B/UGCG/MARCKS/OGDH/ZFP36/PITPNA/MCL1/CBFB/IFI16/SERPINB8/PUM3/PUM2/CD164
LUI_THYROID_CANCER_CLUSTER_2	43	0.53568	1.95286	0.000454856	0.00178292	0.000844363	7935	tags=44%, list=16%, signal=37%	ACAA1/ABCC3/SORD/ELMO1/ACADVL/FBP1/MFAP3L/ZCCHC24/PAN2/SYNE1/ID1/PPARG/SECISBP2L/RDH11/NID2/HIC2/HECTD4/PPIL2/TOB2
REACTOME_GLYCOGEN_SYNTHESIS	16	0.68042	1.95258	0.000667854	0.00249737	0.00118271	1630	tags=38%, list=3%, signal=36%	UGP2/PGM1/GBE1/GYS2/PPP1R3C/GYG2
KENNY_CTNNB1_TARGETS_DN	51	0.518312	1.95164	0.000458821	0.00178292	0.000844363	7388	tags=41%, list=15%, signal=35%	IGF2/SDHA/HAO1/ECM1/CD4/SEL1L/CALCOCO1/SEC62/NCOR1/C6orf62/COL6A1/IL6ST/FN1/CCDC47/PPP6R3/ENPP2/TXNIP/USP9X/DPYSL2/HNRNPH1/OGFOD2
DAVICIONI_RHABDOMYOSARCOMA_PAX_FOXO1_FUSION_UP	64	0.494977	1.95117	0.000454649	0.00178292	0.000844363	8245	tags=47%, list=16%, signal=39%	ASS1/AQP3/GATM/EPB41L4B/GADD45A/ABAT/TIAF1/MET/DIPK1A/FGGY/HDAC5/MEG3/TMEM47/ZNF395/FGFR4/TCF7L2/NMRK1/ACAT2/GAREM1/FAM49A/JAKMIP2/SKP2/TMX4/ADAM10/THEMIS2/RWDD3/CARHSP1/FAM3C/PELI1/NR2F2
YAO_HOXA10_TARGETS_VIA_PROGESTERONE_UP	80	0.473021	1.95084	0.000229568	0.00110632	0.000523932	3773	tags=26%, list=7%, signal=24%	CES2/APOE/PROS1/LEPR/RARRES2/KLF9/THRSP/XDH/NDRG2/IGFBP3/TNS2/CYP2E1/RNASE4/SHD/PIK3R1/PEG3/TNXB/ID1/CLDN5/CHERP/PBX3
SCHLINGEMANN_SKIN_CARCINOGENESIS_TPA_DN	25	0.606197	1.9504	0.000899281	0.00318295	0.00150739	4067	tags=36%, list=8%, signal=33%	GPT/THRSP/APOC1/PLEKHA5/ENO3/RSRP1/GRN/ANKRD17/ITM2B
FIRESTEIN_PROLIFERATION	163	0.421785	1.95038	0.00023872	0.00110632	0.000523932	8591	tags=36%, list=17%, signal=30%	XYLB/PFKFB1/GCKR/NR1I2/PPARA/PKLR/NR1H4/COQ8A/CDK3/FYN/PIK3AP1/CMPK1/KDR/IRAK2/AK3/HIPK2/PRKAA1/ADK/CYLD/CSNK2A2/PIK3R1/MERTK/TAOK3/CNP/SLC22A18/MAP3K14/FIGN/RAF1/PPARG/CD40/FGFR3/TERF2IP/CDK6/AKAP6/ERBB3/KALRN/TXK/PPP1R12C/AKAP7/CDK11B/CDK9/PHKB/ETNK1/PRKAR1B/COL4A3BP/SIK1/RCSD1/INPP5D/EP300/MAPK8/ELP1/MAP2K6/AXL/EPHB4/GALK2/DLG2/TAF1/ZC3HC1
REACTOME_METHYLATION	14	0.707551	1.94886	0.00112158	0.00381575	0.00180707	8064	tags=57%, list=16%, signal=48%	CYP1A2/NNMT/MAT1A/GSTO1/TPMT/AS3MT/AHCY/MTR
WAMUNYOKOLI_OVARIAN_CANCER_GRADES_1_2_DN	70	0.485355	1.94807	0.000227739	0.00110632	0.000523932	6397	tags=37%, list=13%, signal=32%	CFI/SERPING1/C3/DPYD/IL1R1/PLSCR4/MAGI2-AS3/C4A/KDR/DOCK4/BNIP3/SSBP3/PPM1K/RGL1/TTC28/HERC2P2/RUFY3/N4BP2L2/FRMD4B/ZNF641/SRSF5/CELF2/ST13/TMX4/GAS1/DOCK11
MCBRYAN_PUBERTAL_BREAST_5_6WK_UP	118	0.441825	1.94749	0.000234412	0.00110632	0.000523932	5305	tags=27%, list=11%, signal=24%	ANPEP/CLU/EHHADH/ZBTB16/PDK4/CYP4V2/TJP2/BCHE/PCOLCE2/IDH1/PRKAG2/PPP1R3C/TMEM56/STXBP6/BLCAP/SFXN1/ACSF2/TPP2/ACOT2/OCLN/PDGFC/CEACAM1/PKP2/SFTPD/SERPINA3/SOCS2/KLHL2/ERBB3/MIS12/MARC1/ENPP3/LIPA
PHONG_TNF_RESPONSE_VIA_P38_PARTIAL	164	0.420476	1.94702	0.000238834	0.00110632	0.000523932	6730	tags=32%, list=13%, signal=28%	RXRA/SLC39A14/CXCL2/EGFR/FOXO1/GABARAPL1/PLPP3/KLHL21/KYNU/ITPRID2/DUSP10/INSIG1/IRS1/CYLD/HERPUD1/PGRMC2/DNAJB9/PPIF/NAMPT/DUSP1/ZNF395/SLC31A2/ID1/TCF7L2/IL4R/TNFRSF10B/PLAC8/MFHAS1/SLC5A3/TPST1/CDH19/STAT3/BIRC2/ID2/ALCAM/RIPK4/BMP2/TUBB2A/TAPBP/LGR5/SLC12A7/IL6ST/TANK/TIPARP/TENT5A/TOB1/CEBPD/HEXIM1/HIVEP1/FNDC3B/NEDD4L/BCL6/BAHD1
ZHANG_RESPONSE_TO_IKK_INHIBITOR_AND_TNF_UP	223	0.403695	1.94694	0.000246731	0.00110632	0.000523932	9139	tags=38%, list=18%, signal=31%	OAF/GCH1/ABTB2/SLC7A2/CLDN1/GCLC/CXCL2/G0S2/ZC3H12C/SAMD4A/TNFRSF10D/KYNU/ARHGAP42/ERN1/IRAK2/STARD5/RTKN/HELZ2/DOCK4/HERPUD1/TRIM15/RCAN1/GRAMD2B/TLE4/CYTH1/ZNF697/PAOX/TNFRSF10B/IFIT1/GSAP/AC026470.1/MFHAS1/IL1RN/IFIH1/IFIT3/KDM7A/SDC4/CMPK2/DNAJC3/TNIP1/BIRC2/DUSP16/MAP2K3/NFAT5/BMP2/TUBB2A/DSE/NFKBIZ/PAG1/CEBPB/TANK/DDX58/FRMD4B/IRF9/OASL/LYN/CITED4/TRIM38/IL1R2/ETS1/EFNA1/IL32/HIVEP1/NEDD4L/…
MULLIGHAN_NPM1_SIGNATURE_3_UP	332	0.385486	1.94603	0.000251636	0.00110632	0.000523932	10504	tags=41%, list=21%, signal=33%	ETFDH/METTL7A/SLC46A3/ATF5/TRPM8/LINC02637/AQP3/TST/CAT/ACO1/ABHD2/SDS/ST3GAL2/DST/TJP2/PINK1/HSD17B4/CTH/GOT1/ARHGEF40/FGL1/LGR4/KYNU/CCL23/SC5D/SELENOP/UGT2B15/ERP44/INSIG1/PPP1R26/XPC/SLC31A1/GK/PPARGC1A/CELF1/MBNL2/CREG1/SH3BP2/CHRM5/ACP2/HTRA1/SPG7/GLUD2/PDLIM5/RESF1/UBR2/MAN2A2/PLOD1/RSRP1/CFLAR/PBX3/DPEP2/CPVL/WWP1/MPHOSPH8/TLK1/MAP3K5/ITGAX/PKN2/METAP2/TBC1D17/CCDC28A/MLLT10/TANK/PRKAB1/R…
MIKKELSEN_NPC_LCP_WITH_H3K4ME3	60	0.499859	1.94545	0.00022604	0.00110632	0.000523932	2677	tags=27%, list=5%, signal=25%	SARDH/SLC25A18/AGT/GPD1/ECM2/SEC16B/PIPOX/CYP2C8/FGD4/TMEM176A/RDH5/MASP1/KIF1C/TNS2/AKNA/CP
ZHAN_MULTIPLE_MYELOMA_DN	42	0.536736	1.94542	0.000454339	0.00178292	0.000844363	7597	tags=48%, list=15%, signal=40%	GLDC/APOE/APOC1/ALDH1A1/SMPDL3A/HHEX/HNMT/PYGL/A2M/PLA2G7/CXCL12/MRC1/VCAM1/LIPA/CEBPD/DPYSL2/CD99/DEFA1/SYK/ITGB2
MCBRYAN_PUBERTAL_TGFB1_TARGETS_UP	160	0.421274	1.94487	0.000237812	0.00110632	0.000523932	7876	tags=38%, list=16%, signal=32%	LIPG/CLU/ACAA2/G0S2/FMR1/TJP2/CD14/GALNT2/ACADVL/RAB17/ACAT1/PTK2B/BMP1/TGM2/ECM1/VASN/KDR/FZD4/MAPK14/PCOLCE/EPAS1/RPS6KA3/APLP2/SMARCA1/TNS1/QKI/SIRPA/OGFR/ETS2/CEMIP2/TPP2/CYTH1/IL13RA1/HTRA1/CALD1/CP/PTPRK/GRB10/PDGFC/CEACAM1/NFIC/CRK/EGLN1/SOCS2/DUSP16/FN1/EPB41L2/PICALM/ETS1/ADAM10/FHL1/AKT1/GUSB/UTRN/DNM2/PLOD2/RAD23A/MAPK8/HSPG2/NFIB/MEF2C
SABATES_COLORECTAL_ADENOMA_DN	295	0.390363	1.94463	0.000249314	0.00110632	0.000523932	5319	tags=25%, list=11%, signal=23%	GHR/ANPEP/IL6R/MST1/SLC51A/CES2/CLU/MST1L/CDHR5/CFH/SYNE3/CHAD/TM6SF2/CYP3A4/ABCA8/CPNE8/MT1M/GBA3/BCHE/CLDN23/FXYD1/SCN9A/IGF1/PLA2G12B/CNNM2/NR5A2/TMEM140/CCL23/WASF3/CDA/UGT2B15/SLC17A4/SLC25A34/LYVE1/TTR/IGHM/PCK1/KNG1/GPC6/HSD17B2/MYLK/AKAP12/SLC15A1/ABCG2/SIGLEC1/ADH1B/ZG16/GREM2/TNS1/LRRK2/XPNPEP2/ASPA/MEP1B/GPX3/CPM/CP/DUSP1/ANGPTL1/THRB/CDH19/CXCL12/LIFR/RSPO3/RUNDC3B/AOC3/TSPAN7/SLC4A4/…
REACTOME_RIP_MEDIATED_NFKB_ACTIVATION_VIA_ZBP1	17	0.666898	1.94421	0.000893455	0.00318295	0.00150739	8002	tags=53%, list=16%, signal=45%	NKIRAS1/RIPK1/IKBKG/MYD88/TICAM1/NKIRAS2/RELA/TLR3/NFKBIB
PID_ARF6_TRAFFICKING_PATHWAY	49	0.518732	1.9441	0.000228102	0.00110632	0.000523932	10278	tags=47%, list=20%, signal=37%	SPAG9/AGTR1/ITGA5/ITGA1/BIN1/PLD1/INS/TSHR/EDNRB/ITGA7/ADRB2/ITGA9/KLC1/CTNND1/DNM2/CDH1/ITGA4/EXOC4/EXOC3/EXOC5/EXOC1/ACAP1/CLTC
WINTER_HYPOXIA_METAGENE	240	0.399181	1.9429	0.00024728	0.00110632	0.000523932	7311	tags=32%, list=15%, signal=28%	IGF2/PFKFB1/ERRFI1/PPARA/SLC16A2/LRP1/PGM1/ENPEP/NT5E/PLIN2/SORL1/ALDH1A1/IGFBP3/MET/ITGA5/TH/ACAT1/GBE1/ANGPTL4/TGM2/ARSE/TF/KDR/INSIG1/AK3/RIOK3/NR3C1/ALDOC/HERPUD1/SIRPA/BNIP3/ENG/IGFBP1/CALD1/CP/ELL2/SAT1/LONP1/MT1L/ENO3/TEK/PIM1/ABCB1/HSP90B1/HSPA5/HGF/FTL/SLC16A1/BIRC2/ID2/COL5A3/NOS3/HMOX1/FN1/CLK1/VPS51/PNP/ARHGAP5/PFKL/POLM/NFIL3/ETS1/EFNA1/TXNIP/SYT7/RELA/CD99/HBP1/IGFBP2/BTG1/TBPL1/PNN…
SASAKI_TARGETS_OF_TP73_AND_TP63	12	0.736345	1.94159	0.0015748	0.0050839	0.00240765	3086	tags=42%, list=6%, signal=39%	SERPINF1/MT1X/MT1H/MT2A/IL4R
ROYLANCE_BREAST_CANCER_16Q_COPY_NUMBER_DN	26	0.59735	1.94097	0.00180099	0.00573889	0.00271784	3970	tags=38%, list=8%, signal=35%	MAF/GPT2/CES1/CES1P1/GNAO1/CES5A/ITFG1/C16orf87/SLC6A2/DNAJA2
WANG_ESOPHAGUS_CANCER_VS_NORMAL_DN	102	0.451888	1.94058	0.000233481	0.00110632	0.000523932	4211	tags=25%, list=8%, signal=23%	ACAA1/RXRA/SHMT1/ALDH4A1/GJB2/IMPA1/ACOX1/AMFR/HECTD1/KIF1C/EPHX1/ADK/TSPAN6/PCYOX1/KCNK5/STK38/GPX3/STIM1/SLC27A4/AFDN/ZER1/GFOD2/STAT4/NRP1/WWP1/PMM1
BARRIER_CANCER_RELAPSE_NORMAL_SAMPLE_DN	31	0.571819	1.93881	0.00112309	0.00381575	0.00180707	8939	tags=58%, list=18%, signal=48%	TBC1D2B/NFE2L1/PSD4/CDK10/SPG7/LAMP1/TYK2/CNPY3/AKAP17A/TCIRG1/N4BP2L2/SPTAN1/SUPT5H/CPSF1/INTS1/NPIPB3/BCR/NSMF
BIOCARTA_NTHI_PATHWAY	23	0.614068	1.938	0.0011241	0.00381575	0.00180707	7787	tags=57%, list=15%, signal=48%	SMAD4/MAPK14/NR3C1/DUSP1/MAP3K14/TGFBR2/MAP2K3/MYD88/MAP3K7/CREBBP/RELA/EP300/MAP2K6
CHEN_LVAD_SUPPORT_OF_FAILING_HEART_DN	42	0.534496	1.9373	0.000454339	0.00178292	0.000844363	7590	tags=50%, list=15%, signal=43%	G0S2/F5/CD14/KCNJ8/IDH1/C6/PPP1R3C/IFIT1/SLC5A3/CTSB/CXCL12/CACNB2/NRP1/APLNR/HEY2/PTGIS/TNFSF10/GIMAP4/CRYM/CLCN3/MARCKS
BIOCARTA_EGF_PATHWAY	27	0.591419	1.93686	0.00158228	0.00510451	0.00241741	9448	tags=52%, list=19%, signal=42%	MAP2K1/EGFR/PRKCA/PIK3R1/RAF1/STAT3/JAK1/SOS1/STAT5A/PIK3CA/MAPK8/STAT1/PRKCB/ELK1
NAKAYAMA_SOFT_TISSUE_TUMORS_PCA1_UP	82	0.467236	1.93612	0.000231	0.00110632	0.000523932	10126	tags=48%, list=20%, signal=38%	CFH/C3/APOL1/TMEM176B/C1S/CD14/CFB/NNMT/KYNU/MME/ECM1/SIGLEC1/CD163/SERPINA1/IL4R/MRC1/CSF1R/FCGR2B/LILRB1/GPNMB/IGHG1/IGKC/C1QB/SLC15A3/IFI44L/IGLC2/BIN2/DCN/PLTP/IGHA1/C1QA/NCKAP1L/ARHGAP15/SRPX2/DOCK2/VSIG4/SLA/HLA-DPA1/MS4A4A
REACTOME_PLATELET_AGGREGATION_PLUG_FORMATION	39	0.54338	1.93586	0.00022941	0.00110632	0.000523932	7601	tags=51%, list=15%, signal=44%	FGG/FGA/FGB/F2/RAPGEF4/APBB1IP/CRK/CSK/FN1/SOS1/ADRA2B/TLN1/PTPN1/THPO/AKT1/GP1BA/ITGB3/RASGRP2/SYK/BCAR1
TONKS_TARGETS_OF_RUNX1_RUNX1T1_FUSION_GRANULOCYTE_UP	53	0.509638	1.93487	0.000228102	0.00110632	0.000523932	8362	tags=42%, list=17%, signal=35%	ALDH5A1/TMEM176B/MTSS1/TMEM176A/ALDH1A1/CYP1A1/GK/CRHBP/ID1/GNAI1/MYRF/SOCS2/CDK6/IL17RB/DNAAF2/LY6E/FHL1/MEIS1/MACF1/MEF2C/TIE1/IFI16
JAIN_NFKB_SIGNALING	73	0.478003	1.93436	0.00022899	0.00110632	0.000523932	9607	tags=38%, list=19%, signal=31%	CLUH/RIDA/SLC23A2/PEX14/LIG4/DECR1/SPHK2/BNIP3/ARMC6/IPO8/ARSB/BCAT2/MPHOSPH9/TICAM1/TM7SF2/TAP2/SNX4/AC118549.1/ASCC3/GATB/METAP1/ORC5/JAK2/DDX46/RAD50/RNF5/STK4/VEGFA
HAN_JNK_SINGALING_DN	39	0.542854	1.93398	0.00022941	0.00110632	0.000523932	4284	tags=33%, list=9%, signal=31%	GHR/C3/LBP/ABCA1/CD14/HSD11B1/IGFBP4/CCL23/CP/SAA1/FAS/LIFR/COL6A1
REACTOME_SIGNAL_ATTENUATION	10	0.774414	1.93363	0.00177857	0.00569685	0.00269793	5134	tags=60%, list=10%, signal=54%	INSR/IRS1/INS/IRS2/GRB10/SOS1
BIOCARTA_PDGF_PATHWAY	28	0.584343	1.9333	0.00135105	0.00449586	0.00212916	9448	tags=50%, list=19%, signal=41%	MAP2K1/PRKCA/PIK3R1/RAF1/STAT3/JAK1/SOS1/STAT5A/PIK3CA/PDGFRA/MAPK8/STAT1/PRKCB/ELK1
REACTOME_LDL_CLEARANCE	19	0.641493	1.9332	0.0015646	0.00505468	0.00239381	7085	tags=47%, list=14%, signal=41%	PCSK9/LSR/APOB/CES3/LDLRAP1/SOAT2/AP2A2/LIPA/SOAT1
SIG_INSULIN_RECEPTOR_PATHWAY_IN_CARDIAC_MYOCYTES	51	0.512464	1.92962	0.000458821	0.00178292	0.000844363	9416	tags=47%, list=19%, signal=38%	FOXO1/SORBS1/AKT2/F2RL2/IRS1/RPS6KA3/PIK3R1/PTEN/IGFBP1/PARD3/IRS2/RAF1/BRD4/SOS1/PIK3CD/PTPN1/AKT1/PIK3CA/SOS2/RPS6KA2/FLOT2/RPS6KB1/MAPK1/PDPK1
KEGG_SELENOAMINO_ACID_METABOLISM	26	0.593696	1.92909	0.00180099	0.00573889	0.00271784	8777	tags=46%, list=17%, signal=38%	CBS/SCLY/CTH/SEPHS2/MAT1A/TRMT11/PAPSS2/AHCY/GGT7/HEMK1/GGT5/AHCYL2
GARGALOVIC_RESPONSE_TO_OXIDIZED_PHOSPHOLIPIDS_GREEN_UP	26	0.593684	1.92905	0.00180099	0.00573889	0.00271784	7592	tags=42%, list=15%, signal=36%	CPNE8/GNE/MALT1/RCAN1/SGMS2/CHD2/CPEB4/DUSP6/ANKRD28/SIK1/TMEM171
BIOCARTA_IGF1_PATHWAY	21	0.624363	1.9263	0.000451569	0.00178292	0.000844363	7693	tags=43%, list=15%, signal=36%	MAP2K1/IGF1/IRS1/PIK3R1/RAF1/SOS1/PTPN11/PIK3CA/MAPK8
REACTOME_VITAMIN_B5_PANTOTHENATE_METABOLISM	17	0.660707	1.92616	0.00134018	0.00446823	0.00211608	7054	tags=41%, list=14%, signal=35%	VNN1/PANK1/ENPP1/COASY/ENPP3/ENPP2/AASDHPPT
PID_ECADHERIN_NASCENT_AJ_PATHWAY	39	0.540352	1.92507	0.00022941	0.00110632	0.000523932	7399	tags=41%, list=15%, signal=35%	VAV2/AP1M1/CSNK2A2/PIK3R1/RAPGEF1/AFDN/CRK/KLHL20/CYFIP2/ITGB7/TJP1/CTNND1/AKT1/DLG1/PIK3CA/TIAM1
CHANGOLKAR_H2AFY_TARGETS_UP	49	0.513612	1.92491	0.000228102	0.00110632	0.000523932	6629	tags=41%, list=13%, signal=35%	ATP11A/ZC3H12C/TMEM176A/IVD/IBTK/SERPINA6/ILVBL/RORA/SMAP2/SERPINA7/RHOU/GRAMD2B/SLC44A1/FAM126A/SLC35G1/ENPP3/SCD/ITPK1/ABHD1/RICTOR
MIYAGAWA_TARGETS_OF_EWSR1_ETS_FUSIONS_UP	264	0.39181	1.92452	0.000250188	0.00110632	0.000523932	6733	tags=31%, list=13%, signal=27%	OAF/GCH1/STEAP3/SLC43A1/HS3ST3B1/CLDN1/PPARA/CES1/SORD/HHIP/DAPK1/APOL6/G0S2/IL1RAP/RARRES2/ABHD6/ZC3H12C/NID1/FYN/KDSR/TGM2/DPP4/HSD17B2/RAPH1/FZD4/MAFB/CPPED1/SPTBN1/EPHA2/EFNB1/SIRPA/SULT1A2/SH2B3/LRCH1/SSBP3/RCN3/NT5DC1/GLG1/FNBP1/HLA-E/ROCK2/PLPP6/CEACAM1/FUCA1/GRK5/ST3GAL5/FAS/P2RX7/CABLES1/EPB41/SPATA13/AKAP13/IMPA2/CMPK2/SLC12A6/ID2/RALGPS2/FCHSD2/GSTM4/LRIG3/DPF3/KALRN/JAK1/ANKH/NGFR/AKA…
REACTOME_EICOSANOID_LIGAND_BINDING_RECEPTORS	15	0.685503	1.92437	0.00224316	0.00695561	0.00329406	10463	tags=67%, list=21%, signal=53%	GPR17/OXER1/PTGER2/LTB4R/PTGDR/PTGDR2/PTGIR/LTB4R2/PTGFR/PTGER4
PID_ECADHERIN_STABILIZATION_PATHWAY	41	0.533236	1.92419	0.000685244	0.00251515	0.00119113	9291	tags=49%, list=18%, signal=40%	AQP3/KIFC3/EGFR/MET/DIAPH1/EPHA2/CAMSAP3/AFDN/HGF/CYFIP2/PLEKHA7/LPP/EFNA1/CTNND1/NECTIN2/CDH1/EXOC4/ROCK1/NCK1/EXOC3
AMBROSINI_FLAVOPIRIDOL_TREATMENT_TP53	108	0.443134	1.92402	0.000232666	0.00110632	0.000523932	5047	tags=28%, list=10%, signal=25%	ACSL1/ABCA5/KHK/ACACB/GPER1/CYP4F3/CXCL2/ACOX2/DHTKD1/CPT1A/DIAPH1/HELZ/BIN1/TSHR/RNASE4/NR3C1/SERPINA1/SULT1A2/LRP6/PARD3/TCAF1/RRAGD/EI24/IL1RN/ITPR2/WHAMMP3/LLGL2/GNA11/PRKAB1/CCDC85C
PID_P38_ALPHA_BETA_PATHWAY	30	0.571141	1.92374	0.00178213	0.00569685	0.00269793	7787	tags=50%, list=15%, signal=42%	FYN/DUSP10/MAPK14/CCM2/RIPK1/DUSP1/MAP3K3/DUSP16/MAP2K3/FGR/BLK/LYN/PAK2/TAB1/MAP2K6
PID_AR_NONGENOMIC_PATHWAY	31	0.56705	1.92264	0.00134771	0.00449012	0.00212645	9394	tags=52%, list=19%, signal=42%	MAP2K1/GNAO1/SHBG/PLCG2/PIK3R1/RAF1/GNAI2/GNAI1/AR/PLCB2/AKT1/PIK3CA/GNG2/MAP2K2/GNRH1/MAPK1
REACTOME_ALPHA_LINOLENIC_OMEGA3_AND_LINOLEIC_OMEGA6_ACID_METABOLISM	13	0.712917	1.92194	0.00224568	0.00695561	0.00329406	2104	tags=46%, list=4%, signal=44%	ACSL1/ACAA1/ACOX1/HSD17B4/SCP2/ELOVL2
REACTOME_SYNTHESIS_OF_SUBSTRATES_IN_N_GLYCAN_BIOSYTHESIS	62	0.489289	1.92075	0.000451162	0.00178292	0.000844363	9376	tags=40%, list=19%, signal=33%	FUOM/ST3GAL2/NEU4/GNE/ST3GAL6/ST6GAL1/NUS1/GNPNAT1/ST3GAL1/ST3GAL5/ST8SIA3/SLC35C1/NPL/CTSA/PMM1/CMAS/ST6GALNAC6/PGM3/GMDS/ST3GAL3/DOLPP1/SLC17A5/ST6GALNAC3/MVD/MPI
BIOCARTA_IL6_PATHWAY	21	0.622549	1.9207	0.00135471	0.00449744	0.00212991	6081	tags=43%, list=12%, signal=38%	IL6R/MAP2K1/RAF1/STAT3/JAK1/CEBPB/IL6ST/SOS1/PTPN11
LI_ADIPOGENESIS_BY_ACTIVATED_PPARG	17	0.658742	1.92043	0.00156355	0.00505468	0.00239381	4892	tags=47%, list=10%, signal=43%	ACSL1/AGT/CEBPA/PC/NR1H3/PPARG/AOC3/DGAT1
CHEN_PDGF_TARGETS	18	0.647866	1.91935	0.00201297	0.006341	0.00300299	9264	tags=67%, list=18%, signal=54%	KLF9/GOT1/MYO1E/SLC2A2/EPHA2/IQCJ-SCHIP1/PLEKHA1/ZFAND5/TIPARP/MCL1/SGPL1/JADE1
BONOME_OVARIAN_CANCER_SURVIVAL_OPTIMAL_DEBULKING	235	0.395375	1.9193	0.000247219	0.00110632	0.000523932	8994	tags=35%, list=18%, signal=29%	BHMT2/CFI/PCK2/AQP3/FOXN3/ABCA6/CFB/SLC16A10/ALDH6A1/PDIA5/ACOT13/ACKR4/ATG2B/CRY2/PDE3B/FYN/C6/C4orf19/SLC3A1/IQGAP2/PCTP/SLC15A1/DNMBP/ZHX3/SP100/CYLD/ARHGAP24/AASS/MYO15B/KCNK5/ADCY1/LRP6/CP/DOP1A/SAT1/OPTN/ITSN1/PCNX1/CMTM6/PSD3/ARNT/WASF1/OPA1/TBC1D13/CEMIP/PLXNB1/ANKRD55/SIRT5/CUX1/PDZK1/PCM1/SLCO1A2/IRF2BP1/PLSCR1/NKIRAS2/LY6E/ZFYVE9/MFSD9/GAA/MSANTD2/NFS1/EMC1/SCAF4/TDP2/ZNF780B/SPR/RGS14…
IGARASHI_ATF4_TARGETS_DN	98	0.450112	1.91833	0.000234137	0.00110632	0.000523932	8373	tags=40%, list=17%, signal=33%	CBS/PSAT1/PCK2/ANG/LEPR/LIN7A/SORL1/AKR1C3/SLC35B4/DDC/DENND5B/AKR1C1/SUCLG2/APOH/PRKAA1/RPS6KA3/SFXN1/PHGDH/GPX2/SGMS2/SLC22A18/NAB1/GNPTAB/PEX19/LIPA/EPS15/CREB3L2/SKP2/AP5M1/VPS36/DOCK11/SEC24D/ETNK1/SOAT1/FRK/NECTIN2/FAM3C/DICER1/KPNA1
REACTOME_TRAF3_DEPENDENT_IRF_ACTIVATION_PATHWAY	14	0.696436	1.91824	0.00201884	0.00635521	0.00300972	8487	tags=57%, list=17%, signal=48%	TRIM25/IRF7/IFIH1/MAVS/DDX58/CREBBP/EP300/IRF3
PID_IL12_2PATHWAY	63	0.48784	1.9175	0.000454752	0.00178292	0.000844363	9398	tags=40%, list=19%, signal=32%	IL1R1/IL18R1/MAPK14/CD4/HLX/SPHK2/STAT6/TYK2/STAT4/IL12RB2/STAT3/MAP2K3/PPP3R1/MTOR/IL2RB/GADD45B/RELA/IL18RAP/HLA-A/STAT5A/MAP2K6/JAK2/STAT1/ATF2/TBX21
CHIARADONNA_NEOPLASTIC_TRANSFORMATION_KRAS_DN	137	0.424068	1.91739	0.000236072	0.00110632	0.000523932	8147	tags=40%, list=16%, signal=34%	CES2/SLC38A4/PHYH/AC129492.1/ATP11A/DHRS3/ALDH1A1/EPHX1/AKAP12/PCOLCE/SPTBN1/RNASE4/NRBP2/DIPK2A/SMAD6/DUSP1/TNXB/GRB10/ENO3/PLAC8/GRK5/ST3GAL5/SLPI/SHROOM3/COQ9/LLGL2/NMT1/TUBB2A/SH3D19/IL6ST/RNPEPL1/PNP/NOTCH1/GSTM1/TSPAN4/TOB1/PAPSS2/GAS1/SPTAN1/SARAF/SAMHD1/ABLIM1/COPZ2/FHL1/SLCO3A1/RFLNB/PSTPIP1/SEC14L1/CTDSP2/INPP5A/IFI35/SNX10/FSTL1/PLTP/RECK
KORKOLA_YOLK_SAC_TUMOR	64	0.486366	1.91723	0.000454649	0.00178292	0.000844363	4858	tags=36%, list=10%, signal=33%	METTL7A/FZD5/CDH2/EHHADH/C5/C1R/CHST13/C1S/RAB17/SALL1/APOA2/VTN/APOA1/FOXA2/IPO5P1/SLC5A9/LINC00261/FYB2/NRG1/SMARCA2/BMP2/PDZK1/CYP26A1
FOURNIER_ACINAR_DEVELOPMENT_EARLY_UP	20	0.628987	1.91717	0.00112562	0.00381813	0.0018082	6733	tags=45%, list=13%, signal=39%	LEPR/PID1/SUCLG2/CEP57/SRD5A1/ZNF277/MACROD1/SEPT10/IGFBP2
KEGG_NON_SMALL_CELL_LUNG_CANCER	54	0.502602	1.91694	0.000228258	0.00110632	0.000523932	9416	tags=48%, list=19%, signal=39%	RXRA/MAP2K1/EGFR/PRKCA/AKT2/PLCG2/PIK3R1/RASSF5/RAF1/RXRB/CDK6/FOXO3/ARAF/SOS1/PIK3CD/PIK3R5/AKT1/PIK3CA/SOS2/RXRG/PRKCB/CASP9/MAP2K2/STK4/MAPK1/PDPK1
GHANDHI_DIRECT_IRRADIATION_UP	103	0.445274	1.91675	0.000232666	0.00110632	0.000523932	6576	tags=32%, list=13%, signal=28%	GCH1/FAM20A/CLDN1/CXCL2/MT1X/G0S2/MT1H/MT1E/HSD11B1/ZC3H12C/GADD45A/KYNU/SLC30A1/MT2A/ANXA10/MT1G/NAMPTP1/NAMPT/PLEK2/PLCL2/TNFRSF10B/FAS/IL33/FRMD4A/SMC5/MT1B/BMP2/NFKBIZ/ASCC3/SOD2/THSD1/ANKRD20A1/BIRC3
YAO_TEMPORAL_RESPONSE_TO_PROGESTERONE_CLUSTER_1	68	0.480836	1.91659	0.00022899	0.00110632	0.000523932	5987	tags=34%, list=12%, signal=30%	PDK4/LEPR/KLF9/CFHR1/FAM20C/ALDH1A1/IGFBP3/HP/ENTPD5/TNS2/XRN1/PEG3/LRP6/DUSP1/SAT1/IRS2/TNXB/TCF25/ITPR2/FOXO3/CEBPB/GADD45B/TXNIP
REACTOME_SIGNALING_BY_THE_B_CELL_RECEPTOR_BCR	165	0.413317	1.91619	0.000238607	0.00110632	0.000523932	12191	tags=41%, list=24%, signal=31%	NFATC3/FYN/PIK3AP1/IGHM/PLCG2/MALT1/PIK3R1/IKBKG/STIM1/BLNK/IGHV4-39/ITPR2/IGLV1-47/NFATC2/CUL1/PPP3R1/BLK/SOS1/PSMD12/MAP3K7/PIK3CD/LYN/CALM1/IGLV3-1/IGKV3-20/IGHV2-70/RELA/IGKV2-28/IGLC2/IGHV3-7/SH3KBP1/SYK/IGHV3-23/PTPN6/NFKBIB/IGHV4-59/IGKV1-39/PRKCB/IGLV2-23/IGHV3-48/NCK1/IGKV2-30/IGKV1-5/IGKV2D-30/PSMF1/IGLV1-40/IGLV1-51/IGKV1-12/IGLV2-11/IGKV4-1/IGHV3-33/PSME3/PSMC6/PSMD11/IGLV2-14/IGKV1-1…
ZHENG_IL22_SIGNALING_UP	56	0.499316	1.91425	0.000228154	0.00110632	0.000523932	4379	tags=30%, list=9%, signal=28%	CLDN1/ALDH1L1/MFSD2A/C3/ARG1/CD14/CFB/LRG1/HP/STOM/SLC25A30/ARRDC4/SAA1/IL33/SLPI/CD38/LILRB3
INGRAM_SHH_TARGETS_UP	123	0.430934	1.91222	0.000234797	0.00110632	0.000523932	5633	tags=34%, list=11%, signal=30%	GRB14/HHIP/KLB/KLF9/CFHR1/GADD45A/NID1/IGFBP4/IGFBP3/MFAP3L/ABCD4/TMEM140/ENPP1/SERPINC1/SELENOP/RORA/EPHX1/AKAP12/SLC27A3/NR3C1/LRMDA/SGMS2/GPR155/CP/DUSP1/GSTZ1/DOCK5/TEK/PLAC8/TRIM10/FTL/CMPK2/FLT4/ZCCHC9/ANKH/SLC12A7/CDC42EP1/SNX18/KLF10/PLSCR1/NFE2L2/CLEC3B
GRYDER_PAX3FOXO1_TOP_ENHANCERS	438	0.368631	1.91149	0.00026062	0.00110632	0.000523932	9158	tags=35%, list=18%, signal=29%	SDC2/SNTB1/IGF2/POR/ERRFI1/ASS1/MFSD2A/SCARB1/DAPK1/PIPOX/TUT7/KANK1/TBX15/GALNT2/TLE1/PROX1/CGNL1/TBC1D2B/ELMO1/SAMD4A/ATOH8/PEMT/SLC38A10/SMPDL3A/TRAM2/SDC1/CLINT1/FYN/PEBP1/FGGY/ANKRD13A/RAPH1/DBT/SETD7/MAN1C1/SPATS2L/FOXN2/TGOLN2/NR3C1/XRN1/ERICH1/PPP1R3B/QKI/SFXN1/PEG3/HDAC5/HACL1/MAGI1/TMEM131L/R3HDM2/PARD3/RAPGEF1/COBL/OS9/ECI2/GRB10/SETX/TCF7L2/NRG1/ITSN2/IL4R/CLASP1/CABLES1/RASSF4/BTD/PG…
WAMUNYOKOLI_OVARIAN_CANCER_GRADES_1_2_UP	140	0.421438	1.91112	0.000235571	0.00110632	0.000523932	7958	tags=36%, list=16%, signal=30%	PBLD/FZD5/RNF128/SLC39A14/SH3BGRL2/GDA/ABCC3/ABHD2/DOK4/CLDN23/PDIA5/PDZD8/ETFB/ACBD5/FNIP2/IQGAP2/CMPK1/IRAK2/ELOVL6/UNC5CL/SFXN1/ABCD3/GNPNAT1/ELL2/SH2D4A/DDAH1/GRTP1/PDIA4/PLAC8/SEC24A/CYP51A1/PLS1/LLGL2/ERBB3/MESD/SAR1B/CEBPG/SLC35D2/VSIG10/ARSD/TM9SF3/GMDS/ETNK1/OCIAD2/MAP7/FRK/SELENOI/PERP/ARHGAP12/EPHB4
GAVIN_FOXP3_TARGETS_CLUSTER_P3	157	0.415409	1.91051	0.00023872	0.00110632	0.000523932	8129	tags=34%, list=16%, signal=29%	SLC35D1/BCO2/GJB2/DGAT2/PHLPP1/CFB/GABARAPL1/ARHGEF12/NAPRT/IGFBP4/PDE3B/CAMK2N1/IL18R1/GALM/ITCH/EPHX1/MYO1E/SPTBN1/ALDOC/MTM1/CBX7/ITSN1/MBP/SORCS2/PPM1L/ATP6V0A1/EHD3/SDC4/ABCA2/LGMN/ID2/IRF5/USP48/IL10RA/OGA/JAK1/TMBIM1/PDE2A/AKAP7/RNF166/CD244/TDRP/CXCR6/PRDX6/C1QTNF6/ARL5A/CLIP1/CAMK2B/NCMAP/MYO1F/RNF216/USP41/FGL2/KLRG1
DURAND_STROMA_NS_UP	164	0.412335	1.90933	0.000238834	0.00110632	0.000523932	4158	tags=25%, list=8%, signal=23%	SLC16A13/GCH1/RNF128/LMO7/MFSD2A/PHYH/ABHD6/MAN1A1/ATOH8/GATA4/SLC35B4/FETUB/MT2A/GATA6/PDE3B/PRKAG2/PEBP1/WNK3/PRRG4/GREM2/IL1RL2/AIG1/CMBL/DDX19B/TLE4/ALDH7A1/FRAT1/TMEM170B/NIPSNAP1/RALGAPA2/KIAA1671/MRPS31/PTPRG/STAG3/SRD5A1/CHN2/PREX2/SLC35G1/LLGL2/DUSP16/RUNDC3B
REACTOME_KETONE_BODY_METABOLISM	10	0.76452	1.90893	0.00222321	0.00691485	0.00327475	1573	tags=60%, list=3%, signal=58%	BDH1/HMGCS2/ACSS3/ACAT1/HMGCL/BDH2
EPPERT_HSC_R	124	0.429198	1.90757	0.000235294	0.00110632	0.000523932	7346	tags=37%, list=15%, signal=32%	SLC17A9/HLF/CFH/DAPK1/FOXO1/DST/ADGRG6/TFPI/ST3GAL6/LONP2/PLSCR4/RNF125/MSMO1/INSIG1/SPTBN1/SMARCA1/CYLD/DNAJB9/CRHBP/FNBP1/PCNX1/ITSN2/ABCB1/WDR91/EIF5/SMARCA2/PNISR/TMEM38B/ZEB1/SOCS2/CACNB2/ALCAM/ATP8B4/PNP/KSR1/FRMD4B/BTBD11/LPP/MREG/DUSP6/RBM7/KMT2A/MEIS1/EPC1/PPP1R16B/RCSD1
ZHOU_INFLAMMATORY_RESPONSE_LIVE_DN	372	0.373318	1.90691	0.000255689	0.00110632	0.000523932	9107	tags=35%, list=18%, signal=29%	SARDH/MLYCD/KLF12/ACAA2/CLPX/CEBPA/TIGD2/DDI2/NR0B2/GLS2/FGD4/NDRG2/PLIN2/ARHGEF40/TNFSF14/RIN3/ZBTB48/NFATC3/TBC1D2/HHEX/SDC1/MAST3/SPRY2/KNG1/GFOD1/DBT/MAPK14/XPC/IFFO1/AVPI1/SLC25A30/MKX/PLA2G15/PIK3R1/SURF6/ORAI3/FRAT1/ZNF395/A2M-AS1/ECI2/MBP/GPRASP2/PAFAH2/PLCL2/LDLRAP1/NRG1/ZNF444/ENHO/FAM215A/INTS10/SIAE/EHD3/MBLAC2/SETDB2/FRMD4A/DCAF8/GLT8D1/COQ9/TBC1D13/MCFD2/CEP44/TMEM177/DPF3/HERC2P2/B…
DANG_REGULATED_BY_MYC_DN	249	0.389927	1.9063	0.00024728	0.00110632	0.000523932	8080	tags=32%, list=16%, signal=27%	ACSL1/ERRFI1/MYO1B/CDH2/UGT1A1/CEBPA/IL1RAP/FOXN3/CFB/PLS3/GADD45A/NUCB1/FCGRT/UGT1A6/AKT2/PLA1A/UGT2B15/AKAP12/PLD1/MT1A/SLC2A2/SEPT4/ALB/CTBS/A2M/CALD1/DUSP1/CHP1/IGF2R/LAMP1/PIM1/PLAC8/IFIT1/FAS/IRF7/CTSB/FTL/REN/TCN2/ITGAL/MCC/ARHGEF7/TGFBR2/GLT8D1/ITM2B/NMT1/CYFIP2/ID2/PEX19/VCAM1/CSK/TSPAN7/KLF7/HMOX1/FN1/BRD2/ALDH9A1/CAST/POM121/GAA/DUSP6/PTPN1/GAS1/SPTAN1/PAK2/ACP5/AKT1/ANXA6/CDKN1B/HNRNP…
PLASARI_TGFB1_SIGNALING_VIA_NFIC_1HR_DN	103	0.442707	1.9057	0.000232666	0.00110632	0.000523932	8220	tags=42%, list=16%, signal=35%	IGF2/PC/HSD17B11/CD14/CYP39A1/CDO1/ZCCHC24/RORA/PPP1R3C/GPC6/PTH1R/RBFOX2/SLC27A3/SPTBN1/PLEKHG1/FAT4/PIK3R1/PEG3/RESF1/IGF2R/ST3GAL5/MAP3K2/GOLGA4/IFI44/TINAGL1/ARGLU1/SNX18/TMTC4/MARF1/CREBBP/RGS5/ANKRD11/RICTOR/AKAP9/CUL5/ATXN2/PERP/SNAPC3/CTSF/SELENBP1/NFIB/KDM5A/NFIA
KEGG_STEROID_BIOSYNTHESIS	17	0.65343	1.90494	0.00268037	0.00814727	0.00385841	7085	tags=59%, list=14%, signal=51%	SC5D/MSMO1/LSS/EBP/CYP51A1/SOAT2/TM7SF2/DHCR24/LIPA/SOAT1
PID_HIF1_TFPATHWAY	66	0.480728	1.90477	0.000228519	0.00110632	0.000523932	7800	tags=44%, list=15%, signal=37%	HNF4A/PGM1/NT5E/FURIN/PLIN2/RORA/TF/SMAD4/ABCG2/BNIP3/ENG/IGFBP1/CP/ABCB1/CXCL12/ARNT/EGLN1/ID2/HMOX1/PFKL/CREBBP/ETS1/NCOA2/AKT1/ITGB2/EP300/MCL1/GCK/FECH
JOHANSSON_BRAIN_CANCER_EARLY_VS_LATE_DN	42	0.525497	1.90468	0.000681508	0.00251082	0.00118908	9099	tags=45%, list=18%, signal=37%	CLU/LRP1/NDRG2/IGFBP4/SELENOP/QDPR/TEF/ALDOC/PLA2G7/CSDC2/ITM2B/GSTM1/CALM1/GRINA/ATP2A2/DCN/CST3/GHITM/SPARCL1
ZHAN_MULTIPLE_MYELOMA_CD1_UP	45	0.517988	1.90447	0.000228258	0.00110632	0.000523932	6923	tags=38%, list=14%, signal=33%	ATF5/PCK2/GPT2/G0S2/INHBE/CTH/FYN/SESN2/PHGDH/HADH/ITGAL/ALPK2/PTGER2/CEBPB/NID2/TOX2/MTG1
BIOCARTA_PCAF_PATHWAY	13	0.706293	1.90408	0.00269481	0.00817525	0.00387166	11591	tags=77%, list=23%, signal=59%	KAT2B/IRF2/IRF7/IRF5/CREBBP/RELA/IRF3/ATF2/IRF1/IRF4
BROWNE_HCMV_INFECTION_10HR_DN	56	0.496612	1.90389	0.000456308	0.00178292	0.000844363	10931	tags=52%, list=22%, signal=41%	KLF9/NT5E/AMACR/PARP4/IRS1/NR3C1/SETX/TCF7L2/ZNF23/ST5/RDH11/BLK/SLC5A4/GLOD4/SCN8A/MTUS1/RANBP6/ANKRD28/AHR/PNN/RBMS1/CBLB/NIPBL/ETV1/PTGFR/MGA/PRKY/PCF11/ZSCAN26
BOYLAN_MULTIPLE_MYELOMA_C_D_DN	268	0.386447	1.90339	0.000250125	0.00110632	0.000523932	7461	tags=31%, list=15%, signal=27%	SNTB1/KHK/MAF/RNF128/CDH2/GDA/ZBTB16/AQP3/PON3/C3/GATM/TMEM176B/SLC41A2/RRAS2/HSD11B1/TMEM176A/DHRS3/XDH/LRG1/HP/ITGA1/ENPP1/IL18R1/MEGF9/GRAMD1C/ZBTB20/SELENOP/RORA/IQGAP2/CPEB3/RAPH1/PYGL/EDEM1/SGMS2/IL13RA1/CP/ELL2/CFP/GIMAP8/PAFAH2/MVB12B/ATP6V0A1/STAT4/TMEM38B/ITGAL/SLPI/SERPINA3/GGH/ID2/VCAM1/HOOK1/ALCAM/LILRB3/KLRK1/TMEM154/AFP/FARP2/FAM135A/PLSCR1/IL2RB/FYB1/NFIL3/SMAD1/IFITM3/FADS3/CXCR6…
KEGG_INOSITOL_PHOSPHATE_METABOLISM	54	0.49893	1.90294	0.000456517	0.00178292	0.000844363	7796	tags=41%, list=15%, signal=34%	PIK3C2G/IMPA1/ALDH6A1/INPP5B/INPP1/PLCG2/MINPP1/PTEN/IPMK/IMPA2/PLCB2/PIK3C3/PIKFYVE/PIK3CD/PLCZ1/INPP5E/ITPK1/INPP5K/PIK3CA/INPP5A/CDIPT/PIP4K2A
JOHNSTONE_PARVB_TARGETS_2_UP	142	0.418495	1.90293	0.000236239	0.00110632	0.000523932	7977	tags=33%, list=16%, signal=28%	OAF/FURIN/IGFBP4/PCOLCE2/LSR/GATA6/AKR1C1/ECM1/AGPAT2/GFOD1/EPHX1/APLP2/CALR/FST/RAB11B/PLEK2/IFIT2/IFIT1/CMTM6/GNAI2/IFIT3/WBP2/TPP1/SLC25A1/VSIR/CLPTM1/TLN1/OASL/LY6E/MINK1/DDX60/RAMP1/HEG1/ASXL2/TFPI2/SPTAN1/SLC4A2/GRINA/NCOA7/GREB1/HLA-A/MT-CO1/NECTIN2/OGDH/RAB29/PPP1R9B/VEGFB
KINSEY_TARGETS_OF_EWSR1_FLII_FUSION_DN	330	0.37709	1.90165	0.000252717	0.00110632	0.000523932	8220	tags=36%, list=16%, signal=30%	LMO7/PXDC1/DOK4/FOXO1/NT5E/FOXN3/DST/ABAT/PID1/TFPI/ATOH8/ALDH1A1/AKR1C3/TSHZ1/IL11RA/ZCCHC24/MYOM1/DLC1/AKR1C1/ELP2/SELENOP/MAN2A1/STAT2/PTH1R/PLG/SIDT2/SATB1/BLCAP/HDAC5/CAMK2D/ORAI3/MAN2B2/SMAD6/TRO/A2M/SLC38A7/IL13RA1/SAT1/BAIAP2/DDAH1/SLC40A1/ZFYVE1/TCF7L2/HLA-E/ECE1/SPSB3/GNAI1/SECISBP2L/TMEM129/AJUBA/CRYBG3/NYNRIN/GRN/FRMD4A/TGFBR2/AFF1/UBXN4/WIPI2/SNAPC4/PSAP/ANKRD6/CYP20A1/TNRC6B/CCS/TME…
ZWANG_CLASS_3_TRANSIENTLY_INDUCED_BY_EGF	229	0.392883	1.90009	0.000247463	0.00110632	0.000523932	7701	tags=32%, list=15%, signal=27%	LMO7/CLDN1/PROS1/CXCL2/IL1RAP/FNDC3A/AC129492.1/TJP2/ZC3H12C/PLPP3/RAPGEF2/PTP4A1/DLC1/ARHGAP42/GATA6/RORA/DPP4/FERMT2/KLF13/PHLDB2/ANO6/DNMBP/EPHA2/FKBP5/DCUN1D3/PPP1R3B/PPTC7/MTM1/ARL5B/MBNL2/VSNL1/ETS2/RCAN1/CEMIP2/LATS2/OTUD1/SGMS2/ELL2/DUSP1/COBL/MBP/CCDC71L/NRG1/PLAC8/IL1RN/SOWAHC/NAB1/PSD3/SNRK/AFF1/SMAD7/RIPK4/NFKBIZ/PPFIBP1/FRMD4B/TIPARP/TJP1/CCNL1/CPEB2/ETS1/TOB1/CEBPD/STX11/ERVK-28/BIR…
PID_GMCSF_PATHWAY	36	0.541559	1.89856	0.00045527	0.00178292	0.000844363	9394	tags=56%, list=19%, signal=45%	MAP2K1/PRKACA/PIK3R1/STAT5B/PIM1/RAF1/CSF2/IRF8/STAT3/SOS1/LYN/PTPN11/CISH/STAT5A/PIK3CA/SYK/JAK2/STAT1/MAP2K2/MAPK1
GARGALOVIC_RESPONSE_TO_OXIDIZED_PHOSPHOLIPIDS_GREY_UP	18	0.640685	1.89808	0.00201297	0.006341	0.00300299	5134	tags=44%, list=10%, signal=40%	CCDC68/RORA/IRAK2/ARRDC4/WHAMMP3/HERPUD2/CREBRF/SOS1
WIKMAN_ASBESTOS_LUNG_CANCER_DN	30	0.563123	1.89673	0.00222767	0.00691952	0.00327697	11481	tags=57%, list=23%, signal=44%	MYO7A/MAFB/PRKACA/AGAP4/PPIG/ATL2/GIMAP6/MIEF1/PRKCSH/ATM/FBXL12/FGL2/ITGA4/MS4A6A/TRBC1/GLRX/UVRAG
LINDSTEDT_DENDRITIC_CELL_MATURATION_D	62	0.483013	1.89611	0.000451162	0.00178292	0.000844363	11435	tags=52%, list=23%, signal=40%	MAF/CDH2/AQP3/PLPP3/ITGA5/FCGRT/SLC6A2/NAAA/NPR1/TPP1/ITGAX/MKNK1/NAGA/CLEC10A/ATP6V1A/CTNND1/CD99/RCBTB2/ACP5/ITGB2/FGL2/IFI16/ADCY7/CDH1/IGSF6/RAP1GAP/CCR1/MTMR6/TGFBI/PRSS3/DAB2/CLEC2B
RUAN_RESPONSE_TO_TNF_UP	11	0.738946	1.89556	0.00315315	0.00934763	0.00442688	8694	tags=82%, list=17%, signal=68%	ABCA1/THRSP/HP/CP/SERPINA3/TAP2/DCN/IFNGR1/STAT1
REACTOME_INTERLEUKIN_2_FAMILY_SIGNALING	44	0.518186	1.89525	0.000457247	0.00178292	0.000844363	8694	tags=45%, list=17%, signal=38%	PTK2B/PIK3R1/STAT5B/IL3/CSF2/STAT4/STAT3/IL15RA/JAK1/SOS1/PIK3CD/IL2RB/STAT5A/PIK3CA/SYK/SOS2/INPP5D/PTPN6/JAK2/STAT1
CHUNG_BLISTER_CYTOTOXICITY_DN	48	0.508225	1.89496	0.000908884	0.00318927	0.00151038	11239	tags=48%, list=22%, signal=37%	PLCG2/KAT2B/RBL2/CFP/GRB10/SLC40A1/MAML3/PPM1A/FBXO38/IGKC/IRAK3/IGLC2/BIN2/FBXO3/ADD3/JPX/PRKCB/CDC42EP3/RIPOR2/PRAM1/PDLIM1/KIAA0513/MTPN
LIU_SOX4_TARGETS_DN	310	0.378333	1.89462	0.000250689	0.00110632	0.000523932	10864	tags=41%, list=22%, signal=32%	LPCAT3/LRP5/HMGCS2/SORBS3/TFPI/AMACR/CPT1A/FUT6/RAB14/ST7/ACY1/MGAT4B/MAPK14/PRRG4/MVK/APLP2/DECR1/FAM13A/SURF6/STAU1/BNIP3/PMPCA/SGPP1/BAG6/TMEM259/LONP1/SPG7/PDLIM5/ITSN2/SNX19/DDT/CBR1/RAF1/ZNF512B/WBP2/SLC44A1/SMARCA2/TPP1/GRN/SHROOM3/IL15RA/EGLN1/PEX11A/OPA1/MICAL3/FZR1/LILRB3/TNRC6B/CTDP1/AKAP17A/DUS1L/SPATA5L1/ATF6/PPFIBP1/UBE2G2/BICD2/IRF9/CAPN15/UFL1/PFKL/SRSF5/UBE3B/NFIX/SLC25A11/GAA/SE…
MONNIER_POSTRADIATION_TUMOR_ESCAPE_DN	372	0.370817	1.89414	0.000255689	0.00110632	0.000523932	9097	tags=37%, list=18%, signal=31%	OAF/SGK2/CLU/ERRFI1/CAT/UGP2/KANSL1L/KLF9/CTSO/APOOL/TTC21B/AOX1/SEPSECS/GRHPR/IDH1/DIPK1A/ACAT1/CPT1A/DENND5B/LRRC8A/TMEM37/ENPP1/PRKAG2/CLYBL/ST6GAL1/AK4/TGM2/KIAA2013/IRAK2/PLD1/AK3/CDK10/ACSS2/COASY/SEPT4/RIPOR3/DECR1/LSS/RNF217/BNIP3/CCDC38/HACL1/TMCO6/SSBP3/PNPLA8/CP/PLEKHF1/ID1/TSPYL1/PDIA4/PIM1/EBP/PLAC8/CRYZ/PKP2/PCGF5/SEC62/PLA2G7/NAXD/DCBLD1/GRN/C6orf120/GLT8D1/HEBP1/GGH/LPIN1/DNAJC3/N…
PROVENZANI_METASTASIS_UP	202	0.397066	1.89409	0.000243724	0.00110632	0.000523932	7970	tags=34%, list=16%, signal=28%	CES2/SLC35D1/SERPINF1/AQP3/CAT/DHODH/PLPP3/QPRT/PLIN2/WDR59/AKR1C3/MET/GOT2/PCCA/AKR1C1/FYN/MME/FOXA2/FGGY/SPRY2/GCSH/ZBED1/ADK/VPS4A/CSNK2A2/DDX19B/VSNL1/CEMIP2/GPX2/GCHFR/MON1B/SAT1/GLG1/NNT/LAMP1/PDIA4/TOMM70/PLAC8/CARD10/NAXD/RGL1/TERF2IP/MCCC2/ATMIN/AARS/AZGP1/PDF/IST1/SEPT6/DDX19A/KDM4C/SKP2/TXNIP/SLC38A2/IPO5/EDC4/PLLP/TXNL4B/WASHC2C/BTG1/MFNG/LTA4H/PRCP/SF3B3/VARS/CTCF/KIZ/CBFB
PID_IL8_CXCR1_PATHWAY	28	0.572444	1.89394	0.00202657	0.00637525	0.00301921	9767	tags=61%, list=19%, signal=49%	PRKCA/PLD1/GNAI2/PLCB2/FGR/GRK2/PRKCE/ARRB2/LYN/GNA14/AKT1/GNG2/PIK3R6/PRKCB/RAB5A/PDPK1/ARRB1
TIEN_INTESTINE_PROBIOTICS_6HR_DN	170	0.40751	1.89386	0.000241429	0.00110632	0.000523932	9024	tags=36%, list=18%, signal=30%	ACAA2/ZGPAT/WWC2/GABARAPL1/RAPGEF2/ACOT13/SMPDL3A/CADM1/SELENOP/IQGAP2/FERMT2/RBFOX2/CPPED1/AKAP2/QKI/DNAJB9/CELF1/PLEKHA5/CALD1/ZNF395/SHLD2/AC026470.1/ZNF512B/POLDIP2/SGMS1/DERA/ID2/RDH11/MPRIP/RIPK4/APMAP/PDZK1/KIDINS220/MIR22HG/SRSF5/TJP1/PPM1B/IL1R2/PICALM/CEBPD/FNDC3B/LRPPRC/ETNK1/BTG1/ANXA6/PPP2R5A/LARS2/SEC14L1/SMIM10L1/KLHL7/MAPK6/RBMS1/MICAL2/SUCLA2/SRRT/SGK1/TMPO/PTS/KIN/RAD50/RNF5/CDC…
KATSANOU_ELAVL1_TARGETS_UP	171	0.407409	1.89355	0.000242895	0.00110632	0.000523932	8211	tags=36%, list=16%, signal=30%	MOGAT2/APOE/SERPING1/PALMD/VNN1/GATM/DAPK1/GADD45A/DHRS3/SPON2/IGF1/MYO7A/CCDC68/ALDH1A1/MYOM1/STOM/TGM2/HIPK2/CMBL/GPX3/ENG/SAT1/PGPEP1/IGF2R/FAS/PCGF5/CTSS/SYCP3/CXCL12/LDB2/NRK/IFI44/C1QC/TMTC1/PAPPA2/PLEKHA2/MPEG1/FOXF1/KLHL24/ATP10D/RGS5/TXNIP/ESD/DUSP6/ABHD1/C1QB/HMCN1/ADGRF5/GDPD5/IGFBP2/ABLIM1/MCEE/RFLNB/PLOD2/CERS4/BLOC1S3/FAM210B/EMCN/TRIM5/C1QA/SPSB1
DAVICIONI_PAX_FOXO1_SIGNATURE_IN_ARMS_UP	60	0.486398	1.89306	0.00022604	0.00110632	0.000523932	6595	tags=42%, list=13%, signal=36%	COL18A1/ASS1/FMR1/PRKCA/GADD45A/ABAT/TIAF1/MET/TRAM2/INPP1/SPATS2L/HDAC5/MEG3/TMEM47/IRS2/FGFR4/TCF7L2/NMRK1/IL4R/PON2/JAKMIP2/SKP2/RASL10A/TMX4/ADAM10
KYNG_ENVIRONMENTAL_STRESS_RESPONSE_UP	53	0.498607	1.89299	0.000228102	0.00110632	0.000523932	5263	tags=26%, list=10%, signal=24%	CXCL2/MT1X/GALNT2/IGFBP3/AKAP12/TXNRD2/EFNB1/TAF1C/FGFR4/HGF/GOLGA4/CCNL2/FN1/SOD1
TAKEDA_TARGETS_OF_NUP98_HOXA9_FUSION_16D_DN	126	0.424332	1.89291	0.000233699	0.00110632	0.000523932	6218	tags=26%, list=12%, signal=23%	CAPN3/MAF/APOE/CYP4F3/SFXN5/SDS/ARG1/SLC16A10/PLPP3/TFPI/IGFBP4/HP/TMEM37/SELENOP/DPP4/TNS1/LRP3/ELL2/ZNF395/RALGAPA2/CEACAM1/CFLAR/SLPI/NCOR1/FRMD4A/PRXL2A/ITGA9/N4BP2L2/SLC18B1/MTUS1/IL1R2/ASXL2/TUT4
LINSLEY_MIR16_TARGETS	205	0.395752	1.89088	0.000243784	0.00110632	0.000523932	9901	tags=42%, list=20%, signal=34%	RNF128/LMO7/SLC39A5/SFXN5/NLRX1/CCDC68/SLC30A1/NAPEPLD/CRY2/MGLL/KIF1C/TMEM245/ATG9A/TPRG1L/RPS6KA3/NKIRAS1/SIRPA/NACC2/ANKS1A/CDC37L1/MFN2/NMD3/TACC1/TNFRSF10B/CARD10/ZCCHC2/CLASP1/PLEKHA3/MAP3K2/SRPRA/GOLGA1/WWP1/TLK1/CDK6/PON2/UBE2R2/CHD9/INTS5/ELL/ANKFY1/MIEF1/KIF21A/ST6GALNAC6/ZFYVE9/KLHL15/IFRD2/SLC25A22/KIF3B/SLC15A4/FAM122A/PEX12/TBCEL/AGO1/GNB5/RAB11FIP2/MACF1/EXT2/USP15/RFK/EFCAB14/TIAM…
YANG_BREAST_CANCER_ESR1_LASER_UP	32	0.553301	1.89086	0.000895456	0.00318295	0.00150739	4036	tags=31%, list=8%, signal=29%	ALAD/IVD/RAB17/CPT1A/HMGCL/SIGIRR/FRAT1/GSTZ1/AR/GOLGA1
BIOCARTA_ECM_PATHWAY	19	0.627325	1.8905	0.00245865	0.00753203	0.00356704	9394	tags=53%, list=19%, signal=43%	MAP2K1/DIAPH1/FYN/PIK3R1/RAF1/ARHGAP5/TLN1/PIK3CA/ROCK1/MAPK1
SASSON_RESPONSE_TO_FORSKOLIN_UP	88	0.45037	1.89037	0.000230681	0.00110632	0.000523932	6236	tags=32%, list=12%, signal=28%	COL18A1/MAP2K1/HSD11B1/ALPL/PTP4A1/PGRMC1/RAB14/PHKA2/MSMO1/MAPK14/GK/FKBP5/ACP2/DUSP1/AL162171.1/TMBIM6/GRK5/CYP11A1/CFLAR/CREBL2/MAP3K5/TUBB2A/RAB27A/PLPP1/TLN1/MAP3K7/TFPI2/DUSP3
VERHAAK_GLIOBLASTOMA_MESENCHYMAL	216	0.393497	1.89011	0.000245761	0.00110632	0.000523932	10490	tags=38%, list=21%, signal=31%	ACSL1/ASL/FURIN/CD14/PLS3/MAN1A1/FES/TEC/IL1R1/ITGA5/KYNU/STAB1/CTSZ/MGAT1/MAN2A1/CD4/MAFB/SIGLEC7/TGOLN2/SP100/PLA2G15/SERPINA1/PYGL/CPQ/SH2B3/ENG/SAT1/STAT6/SIGLEC9/IL4R/TNFRSF1A/HK3/CTSB/GRN/TGFBR2/IL15RA/TNFRSF1B/NRP1/TLR4/LILRB3/MGST2/DSE/TMBIM1/RAB27A/FCGR2B/CEBPB/TCIRG1/RBKS/CAST/TRIM38/LCP2/FNDC3B/SEC24D/COPZ2/TRIM22/LAMB1/THEMIS2/MYO1F/ITGB2/CYTH4/RBMS1/ICAM3/PTPRC/PTPN6/HEXA/ITGA4/LILRB…
REACTOME_P130CAS_LINKAGE_TO_MAPK_SIGNALING_FOR_INTEGRINS	15	0.673203	1.88985	0.00336474	0.00985012	0.00466485	7601	tags=60%, list=15%, signal=51%	FGG/FGA/FGB/APBB1IP/CRK/FN1/TLN1/ITGB3/BCAR1
PEDRIOLI_MIR31_TARGETS_DN	411	0.366686	1.88984	0.000260485	0.00110632	0.000523932	6198	tags=27%, list=12%, signal=24%	BHMT2/BACE1/CLU/GCH1/SLC46A3/MDN1/PDK4/PPARA/CXCL2/N4BP2L1/KANK1/MLIP/PROX1/INHBC/ARHGEF12/LRG1/CTSO/NID1/TNFSF14/P4HB/MYOM1/AADAC/TMEM140/CSAD/IDNK/FBXL4/AKR1C1/CAMK2N1/PLA1A/MAT1A/LYVE1/AKAP12/IRAK2/TMOD1/CHRNE/ABCG2/HLX/ANO6/SLC31A1/TRIM14/MAN2C1/LINC00242/RHOU/EDNRB/LATS2/CPM/CX3CL1/PNPLA7/REXO1/ZFAND3/TACC1/ENO3/CWF19L2/RPA4/IFIT2/PLAC8/IFIT1/GSAP/AFDN/ADAT2/SELE/P2RX7/IFIH1/PPM1K/IFIT3/SECI…
CASTELLANO_NRAS_TARGETS_UP	70	0.470489	1.8884	0.000455477	0.00178292	0.000844363	10098	tags=44%, list=20%, signal=35%	SARDH/PON3/ACADM/VNN1/LBP/ENPEP/FNDC3A/SDC1/EPHX1/ERCC5/ITIH2/CX3CL1/IL13RA1/IL1RN/IFIH1/TUBB2A/PLSCR1/CCNG1/UGT1A8/PERP/IFI35/PLTP/USP41/EXOC4/STAT1/TMEM43/PQLC3/SPCS3/AK1/ANXA4/YIF1A
KRISHNAN_FURIN_TARGETS_DN	10	0.756207	1.88817	0.00355714	0.0102784	0.00486766	7257	tags=60%, list=14%, signal=51%	LEPR/APOL2/OPLAH/TSPAN9/PTGR2/NCMAP
CHEN_HOXA5_TARGETS_9HR_UP	223	0.391333	1.88732	0.000246731	0.00110632	0.000523932	12228	tags=47%, list=24%, signal=36%	CROCCP2/SCG5/TUT7/GABARAPL1/CTH/ARNTL/PLG/JMJD1C/HLX/LIG4/BACH1/ETS2/RCAN1/MTHFD2L/CENPC/SAT1/TNFRSF10B/IRF7/EIF5/SEC24A/ZNF23/C2orf42/PYROXD1/IFRD1/BIRC2/STRN3/PPIG/FOXO3/ZCCHC8/CHD9/NRBF2/CEBPB/SPATA5L1/CLK1/TANK/RIC8B/MORC3/KLF10/FBXO38/AC118549.1/CEBPG/KMT5B/TIPARP/CCNT2/GADD45B/ADPRM/CCNL1/NFIL3/NEK1/CLK4/DUSP6/THSD1/ZNF451/BIRC3/PIBF1/RNF111/MCL1/RBM5/ZNF44/NEMF/BTN2A1/PELI1/SLTM/SNAI2/IFI1…
GAVIN_FOXP3_TARGETS_CLUSTER_T4	96	0.443716	1.88731	0.000232396	0.00110632	0.000523932	6371	tags=31%, list=13%, signal=27%	NT5E/GLUD1/SMPDL3A/SC5D/LARP1B/RORA/APOL2/MTHFS/RESF1/OTULIN/PPM1L/RRAGD/P2RX7/FAM107B/STAT4/ETFBKMT/ANKRD17/SOCS2/NRP1/CD38/SNX14/SNX18/PLSCR1/IL2RB/AHNAK/ATP10D/IL1R2/AHCY/STX11/SLC30A7
SENESE_HDAC2_TARGETS_UP	116	0.429	1.88622	0.000233263	0.00110632	0.000523932	9744	tags=43%, list=19%, signal=35%	SLC39A14/G0S2/SCG5/PPP2R1B/ATP13A3/KYNU/ITPRID2/AADAC/TGM2/LMAN1/ANTXR2/DOCK4/NAMPT/SAA1/TNFRSF10B/PCGF5/NAB1/CSF2/SLC16A1/CREBL2/TGFBR2/LARP4/NFKBIZ/IL6ST/MYCT1/CSTF2T/STYX/MEGF10/SKP2/DPY19L1/RBM14/DUS3L/CDV3/PXN/MTAP/MCL1/DNAJB14/CBFB/MLX/TAF3/CDC42SE2/LPXN/KISS1/BCLAF1/RAB5A/PAX8-AS1/SCYL2/SUPT6H/EXOC5/TNFAIP3
RASHI_RESPONSE_TO_IONIZING_RADIATION_6	88	0.449316	1.88594	0.000230681	0.00110632	0.000523932	6587	tags=27%, list=13%, signal=24%	SLC38A4/ARNTL/EIF4EBP2/CCL23/IL18R1/IGHM/KNG1/ADH1C/ALDOC/BAG6/CFP/SAA1/FAS/MBTD1/TCF25/SLPI/SEC61A2/IGHV1-18/FCGR2B/GRK2/UNC93B1/IL1R2/CUL2/IGLC1
CHIARADONNA_NEOPLASTIC_TRANSFORMATION_CDC25_UP	119	0.427551	1.8852	0.000235183	0.00110632	0.000523932	4423	tags=29%, list=9%, signal=27%	IGF2/ERRFI1/LMO7/PDK4/C3/TMEM176B/TMEM176A/XDH/ATP13A3/NID1/IL1R1/CDO1/PGRMC1/AOX1/SEPHS2/MAN2A1/PPID/PHLDB2/SYNPO/GREM2/NGEF/PTEN/BACH1/EIF2AK4/SAA1/HSP90B1/APBB1IP/CTSB/TPST1/SLC16A1/RAMP3/PRXL2A/VCAM1/PHLDA1/NAV2
PID_HIV_NEF_PATHWAY	35	0.540322	1.88484	0.000904364	0.00318578	0.00150873	12963	tags=60%, list=26%, signal=45%	RIPK1/CRADD/MAP3K14/TNFRSF1A/FAS/CFLAR/MAP3K5/BAG4/RELA/BIRC3/MAP2K7/APAF1/MAPK8/CASP9/TRAF1/DFFA/CASP3/BID/TRADD/NFKBIA/CASP7
REACTOME_CLASS_I_MHC_MEDIATED_ANTIGEN_PROCESSING_PRESENTATION	370	0.369048	1.88451	0.000254001	0.00110632	0.000523932	11379	tags=39%, list=23%, signal=31%	FBXO31/FBXO17/LMO7/ZBTB16/CD14/KLHL21/HECTD1/FBXL4/ITCH/UBE4A/SEC24B/RNF123/HERC6/HERC5/CALR/CTSL/RNF217/TPP2/IKBKG/UBR4/UBR2/HLA-E/KLHL13/HECTD3/HSPA5/HECW2/CTSS/SEC24A/MIB2/UBA7/CUL1/FBXW5/TIRAP/KLHL20/ERAP1/MRC1/WWP1/FZR1/ASB9/MYD88/SEC61A2/TLR4/UBE2E3/KLHL2/PJA2/RNF130/UBA5/UBE2R2/UBE3D/TAPBP/SAR1B/DTX3L/TAP2/UBE2G2/HERC1/SEC31A/PSMD12/UFL1/FBXO7/UBE3B/UBE2E2/SKP2/CDC34/KBTBD7/ASB6/FBXO21/FBX…
REACTOME_DAP12_SIGNALING	29	0.563864	1.88431	0.00178293	0.00569685	0.00269793	7333	tags=38%, list=15%, signal=32%	VAV2/FYN/PLCG2/PIK3R1/HLA-E/KLRK1/SOS1/KLRC2/LCP2/PIK3CA/SYK
GEISS_RESPONSE_TO_DSRNA_DN	15	0.671156	1.8841	0.00336474	0.00985012	0.00466485	7167	tags=47%, list=14%, signal=40%	PCK2/STAB1/TOMM70/WASF1/VCAM1/MEIS1/PRKAR1B
HOLLERN_MICROACINAR_BREAST_TUMOR_UP	45	0.512417	1.88399	0.000456517	0.00178292	0.000844363	4292	tags=36%, list=9%, signal=33%	UPB1/GJB1/GNE/SMPDL3A/CLDN2/PIK3AP1/IQGAP2/HOMER2/PPARGC1A/AASS/LMTK2/BCKDHA/SLC31A2/CHN2/DHRS4/DDO
BURTON_ADIPOGENESIS_PEAK_AT_8HR	37	0.534185	1.88395	0.000455166	0.00178292	0.000844363	7982	tags=46%, list=16%, signal=39%	POR/RRAS2/ITGA5/RCL1/SLC23A2/SDC1/ARL4D/GSTO1/PLAC8/PRR5/SLC16A1/TUBB2A/CEBPB/PRDX6/SAMHD1/TIAM1/FGL2
CHEOK_RESPONSE_TO_MERCAPTOPURINE_AND_HD_MTX_DN	24	0.590449	1.88354	0.0022482	0.00695561	0.00329406	9779	tags=50%, list=19%, signal=40%	CENPC/ABCA2/TGFBR2/MPHOSPH9/TGDS/AHCY/NKG7/SART1/YTHDC2/UBE2G1/FAM216A/SMCHD1
REACTOME_MITOCHONDRIAL_CALCIUM_ION_TRANSPORT	23	0.596719	1.88325	0.0022482	0.00695561	0.00329406	6882	tags=39%, list=14%, signal=34%	MICU3/MICU1/AKAP1/PMPCA/SPG7/SLC8B1/PMPCB/AFG3L2/MAIP1
GUTIERREZ_WALDENSTROEMS_MACROGLOBULINEMIA_1_UP	10	0.754106	1.88292	0.00355714	0.0102784	0.00486766	3147	tags=50%, list=6%, signal=47%	ABCB4/BACH2/APLP2/IL4R/ABCB1
GARGALOVIC_RESPONSE_TO_OXIDIZED_PHOSPHOLIPIDS_PINK_DN	34	0.544092	1.88269	0.000901917	0.00318295	0.00150739	7876	tags=47%, list=16%, signal=40%	PALMD/TMEM140/ACKR4/LONRF3/DEPP1/GIMAP8/EHD3/LRIG3/FILIP1/GIMAP6/GIMAP7/LYN/ZEB2/TNFSF10/COL4A3BP/MEF2C
WILENSKY_RESPONSE_TO_DARAPLADIB	30	0.558544	1.88131	0.00222767	0.00691952	0.00327697	7597	tags=37%, list=15%, signal=31%	APOE/CD4/SLC27A4/PLA2G7/CTSS/NPL/HMOX1/ARRB2/CD68/BIN2/ITGB2
SA_CASPASE_CASCADE	19	0.624204	1.8811	0.00290568	0.00870216	0.00412119	12963	tags=68%, list=26%, signal=51%	SCAP/FAS/BIRC2/PRF1/BIRC3/APAF1/CASP10/CASP9/DFFA/CASP3/XIAP/SREBF2/CASP7
KYNG_WERNER_SYNDROM_UP	15	0.669911	1.8806	0.00336474	0.00985012	0.00466485	8910	tags=60%, list=18%, signal=49%	IGFBP3/LIG4/SAT1/HADH/PLD3/FRA10AC1/PICALM/SOAT1/CCN2
WU_SILENCED_BY_METHYLATION_IN_BLADDER_CANCER	51	0.499356	1.88026	0.000458821	0.00178292	0.000844363	9644	tags=47%, list=19%, signal=38%	ANPEP/CES2/FMO5/GATM/IGF1/ZCCHC24/FCGRT/SELENOP/PEG3/GCHFR/COBL/ERBB3/SLC4A4/UBL3/MIR22HG/KLRC2/JCHAIN/ITGB2/PTPRC/FGL2/CLIC2/PLEK/LMO2/NR4A3
REACTOME_CD28_CO_STIMULATION	33	0.54655	1.88019	0.0011241	0.00381575	0.00180707	7009	tags=36%, list=14%, signal=31%	AKT2/FYN/PIK3R1/MAP3K14/PRR5/MAPKAP1/MTOR/LYN/PAK2/RICTOR/AKT1/PIK3CA
REACTOME_DOWNSTREAM_SIGNAL_TRANSDUCTION	29	0.562631	1.88019	0.00178293	0.00569685	0.00269793	8932	tags=48%, list=18%, signal=40%	PIK3R1/STAT5B/RAPGEF1/STAT6/CRK/STAT3/SOS1/PTPN11/STAT5A/PIK3CA/PDGFRA/BCAR1/STAT1/NCK1
GRAHAM_NORMAL_QUIESCENT_VS_NORMAL_DIVIDING_UP	64	0.476826	1.87962	0.000681973	0.00251082	0.00118908	5769	tags=30%, list=11%, signal=26%	VNN1/CXCL2/DST/TFPI/ALDH1A1/KYNU/IL18R1/HLX/SPTBN1/GABPB1-IT1/CRHBP/OPTN/FNBP1/TCF7L2/STAT4/NFAT5/PPFIBP1/MIR22HG/SOD2
HELLER_HDAC_TARGETS_DN	294	0.377445	1.8788	0.00025025	0.00110632	0.000523932	7890	tags=32%, list=16%, signal=27%	SNTB1/CBS/IL6R/PSAT1/MAF/SORD/SLC47A1/KCNT2/KANK1/GAS2/GADD45A/INHBE/CTH/TNFRSF10D/KLHL21/ST3GAL6/NFE2L1/CADM1/FAM149A/ADI1/SDC1/ST6GAL1/ST7/RORA/IQGAP2/SHMT2/TSHR/ELOVL6/AKAP2/HERPUD1/DNAJB9/DCPS/LRRC61/CALR/PPIF/DEPTOR/SLC19A1/TAPBPL/MBP/MRTO4/GSTO1/ELAC2/MYCL/PDIA4/BLNK/CEACAM1/HSP90B1/HSPA5/FAS/EIF5/CCDC69/NFIC/HGF/SLC33A1/CFLAR/EHD3/TPP1/FGFR3/CUL1/MYOM2/CTPS1/ERAP1/WNT5B/TLK1/PITPNC1/ITGB7/…
BOYLAN_MULTIPLE_MYELOMA_D_DN	75	0.461227	1.87809	0.000229043	0.00110632	0.000523932	7866	tags=35%, list=16%, signal=29%	UPB1/ABTB2/EHHADH/SYNE3/HSD17B11/ATP11A/CCL23/IFFO1/ST3GAL5/CMPK2/LIFR/DENND1C/DDX3Y/KSR1/CSTF2T/AHNAK/ARHGAP21/TDRD7/LILRA6/PPP1R16B/EZH1/MARCKS/CCDC88A/CYTH4/FLOT2/RPGRIP1
REACTOME_CLEC7A_DECTIN_1_INDUCES_NFAT_ACTIVATION	11	0.732038	1.87784	0.00337838	0.00985922	0.00466916	5810	tags=45%, list=12%, signal=40%	NFATC3/ITPR2/NFATC2/PPP3R1/CALM1
REACTOME_GROWTH_HORMONE_RECEPTOR_SIGNALING	24	0.588651	1.87781	0.0022482	0.00695561	0.00329406	9394	tags=58%, list=19%, signal=47%	GHR/IRS1/STAT5B/IRS2/STAT3/SOCS2/LYN/PTPN1/CISH/STAT5A/PTPN6/JAK2/STAT1/MAPK1
KEGG_NITROGEN_METABOLISM	23	0.59499	1.87779	0.0022482	0.00695561	0.00329406	2800	tags=35%, list=6%, signal=33%	HAL/AMT/CA5A/GLS2/GLUD1/CPS1/CTH/GLUD2
REACTOME_DDX58_IFIH1_MEDIATED_INDUCTION_OF_INTERFERON_ALPHA_BETA	78	0.45788	1.87721	0.000229463	0.00110632	0.000523932	9744	tags=42%, list=19%, signal=34%	NLRX1/TKFC/ITCH/RNF125/TRIM25/HERC5/CYLD/NKIRAS1/RIPK1/DHX58/IKBKG/SAA1/IRF7/IFIH1/MAVS/UBA7/TANK/DDX58/NKIRAS2/CREBBP/RELA/AGER/NLRC5/EP300/RNF216/CASP10/NFKBIB/OTUD5/IRF3/ATG12/UBE2D3/PCBP2/TNFAIP3
BIOCARTA_EGFR_SMRTE_PATHWAY	11	0.731718	1.87702	0.00337838	0.00985922	0.00466916	3466	tags=55%, list=7%, signal=51%	RXRA/ZBTB16/MAP2K1/EGFR/MAPK14/THRB
GARGALOVIC_RESPONSE_TO_OXIDIZED_PHOSPHOLIPIDS_BLACK_DN	10	0.75172	1.87697	0.00377946	0.010814	0.00512131	6307	tags=60%, list=13%, signal=52%	MTSS1/SLC30A1/ELAC1/ZNF22/ABHD10/ZEB2
KEGG_CELL_ADHESION_MOLECULES_CAMS	131	0.418228	1.87684	0.000235128	0.00110632	0.000523932	4615	tags=23%, list=9%, signal=21%	SDC2/CDH2/CLDN1/CLDN14/CLDN23/CADM1/CLDN2/SDC1/CD4/SIGLEC1/NECTIN3/CLDN15/PVR/CLDN22/OCLN/GLG1/HLA-E/CDH5/SELE/CLDN20/CD40/CLDN16/CLDN5/SDC4/ITGAL/ESAM/VCAM1/ALCAM/ITGA9/ITGB7
CHUNG_BLISTER_CYTOTOXICITY_UP	135	0.415996	1.87661	0.000236351	0.00110632	0.000523932	8368	tags=31%, list=17%, signal=26%	ATF5/PCK2/SERPING1/PHYH/SLC43A3/MT1E/GALNT2/ALDH6A1/PLIN2/MYO7A/MT1F/FLVCR2/ETFB/SDHA/CD81/ILVBL/CNDP2/PGRMC2/CTSL/GCHFR/N4BP2/CTSB/SDC4/CYB5A/IGFLR1/DUSP16/C1QC/AKR1A1/SOD1/CHID1/ADAP2/C1QB/ACP5/MDC1/SMIM12/SNX9/RFK/THYN1/CBLB/COQ5/GNLY/ASMTL
PEDERSEN_METASTASIS_BY_ERBB2_ISOFORM_3	19	0.622588	1.87623	0.00290568	0.00870216	0.00412119	6531	tags=53%, list=13%, signal=46%	LMO7/EGFR/STARD4/ZNF697/PKP2/NPY1R/MIR22HG/CPEB4/TFPI2/NABP1
MULLIGHAN_NPM1_MUTATED_SIGNATURE_2_UP	129	0.418808	1.87619	0.000234247	0.00110632	0.000523932	7837	tags=34%, list=16%, signal=29%	METTL7A/TRPM8/AMN/LINC02637/TST/CAT/ACO1/DST/HSD17B4/CTH/LGR4/KYNU/AKAP12/PPP1R26/GK/PPARGC1A/MBNL2/ACP2/SPG7/RESF1/MAN2A2/PBX3/WWP1/TLK1/PKN2/METAP2/TBC1D17/MLLT10/TANK/PRKAB1/ZXDC/OGFOD3/NFE2L2/TXNIP/CRP/MCHR1/MEIS1/CAPRIN2/MSH3/UGGT1/GNRHR/RBM5/STAG2/DHFR
REACTOME_SYNTHESIS_OF_PIPS_AT_THE_EARLY_ENDOSOME_MEMBRANE	16	0.653532	1.87542	0.00311665	0.00926289	0.00438675	5734	tags=56%, list=11%, signal=50%	MTMR10/MTMR4/MTM1/PI4K2B/VAC14/PIK3R4/PIK3C3/PIKFYVE/PI4K2A
MULLIGHAN_NPM1_MUTATED_SIGNATURE_1_UP	262	0.381645	1.8737	0.000250063	0.00110632	0.000523932	9632	tags=37%, list=19%, signal=30%	CYP2C18/ETFDH/METTL7A/SLC46A3/ATF5/TRPM8/LINC02637/AQP3/TST/CAT/ACO1/SDS/ST3GAL2/DST/TJP2/HSD17B4/CTH/GOT1/LGR4/KYNU/DLC1/CCL23/ACSM3/SC5D/SELENOP/UGT2B15/INSIG1/XPC/GK/PPARGC1A/MBNL2/CREG1/SH3BP2/CHRM5/HTRA1/SPG7/UBR2/MAN2A2/CFLAR/PBX3/WWP1/MPHOSPH8/MAP3K5/ITGAX/PKN2/METAP2/TBC1D17/CCDC28A/TANK/OGFOD3/MAP3K7/NFE2L2/TRIM38/TXNIP/PTPN11/ATM/RBM25/CRP/MCHR1/DCUN1D4/EPHA1/VCP/MEIS1/ZNF780B/LEPROT/CA…
BAUS_TFF2_TARGETS_UP	30	0.556264	1.87363	0.00245043	0.0075167	0.00355978	6485	tags=37%, list=13%, signal=32%	CYP2D7/APOC2/APOA4/SLC2A2/ZG16/OGFR/IRF7/ZEB1/BCAT2/GUCA2B/SAMHD1
REACTOME_INTERLEUKIN_6_SIGNALING	11	0.730284	1.87334	0.0036036	0.0103678	0.00491003	8694	tags=73%, list=17%, signal=60%	IL6R/TYK2/STAT3/JAK1/IL6ST/PTPN11/JAK2/STAT1
DELACROIX_RARG_BOUND_MEF	361	0.367497	1.87223	0.000255297	0.00110632	0.000523932	6122	tags=26%, list=12%, signal=23%	CYP2D6/SLC35D1/FAM20A/PALMD/SHPK/HGFAC/ACADM/SYNE3/LRP1/GPR146/DOK4/ANKRD24/CFL2/IDO2/DST/FURIN/CAPN5/THRSP/ECHDC3/ATP11A/GAS2/GABARAPL1/DHRS3/MMAA/NID1/AOX1/ZNF319/PITPNM2/RILP/TNS2/PCOLCE/SUN2/SPTBN1/AVPI1/DPP9/ITIH2/CALR/UCK1/SMAD6/OMP/TPST2/CP/DUSP1/SAT1/C1QTNF1/PGPEP1/MRGPRF/AMPD2/RESF1/OXNAD1/TYK2/ROCK2/BLNK/SERINC5/PPM1L/TSPAN9/CARD10/FIGN/IL1RN/FAM107B/ST5/CTSB/FTL/ARSA/TIRAP/IFRD1/AOC2/C…
MULLIGHAN_MLL_SIGNATURE_1_DN	237	0.385302	1.87194	0.000247954	0.00110632	0.000523932	7532	tags=33%, list=15%, signal=28%	MAF/HLF/CXCL2/SLC9A3R2/DAPK1/SLC13A3/ELMO1/TFPI/WDR59/HPGD/DLC1/CSAD/STOM/BIN1/TREH/BCKDHB/CYP2E1/STXBP6/TSHR/ADK/MAPRE2/SMARCA1/FAM171A1/STAT5B/LRP6/DEPTOR/FAH/ABCB1/IFIT1/HS2ST1/GSDMB/HGF/STAT4/RIPOR1/MYRF/WASF1/ZSWIM8/IFI44/MRC1/PRF1/ADNP2/MRPS2/MBIP/CLMN/HSD17B12/JAK1/TSPAN7/MYH10/TRIM24/P2RX3/CETP/KATNB1/EPS15/SIPA1L1/SRSF5/MROH7/SLC12A4/CCNG1/NIT2/PITPNB/NID2/RASL10A/ABHD10/MUC4/ISOC1/DCUN1…
BAKKER_FOXO3_TARGETS_UP	55	0.489393	1.8707	0.000685871	0.00251515	0.00119113	7492	tags=36%, list=15%, signal=31%	ARG1/PINK1/CPT1A/DENND5B/GUCD1/SIRPA/RBL2/OSBPL9/AMPD2/GRIA3/GNAI2/SLC12A6/PNPLA6/NQO2/ULK1/CPEB4/NKIRAS2/BTG1/CDKN1B/DCN
REACTOME_SIGNALING_BY_LEPTIN	11	0.729113	1.87034	0.0036036	0.0103678	0.00491003	8192	tags=73%, list=16%, signal=61%	LEPR/IRS1/STAT5B/IRS2/STAT3/PTPN11/STAT5A/JAK2
REACTOME_MET_ACTIVATES_RAS_SIGNALING	11	0.72911	1.87033	0.0036036	0.0103678	0.00491003	7687	tags=55%, list=15%, signal=46%	MUC20/MET/RANBP10/HGF/SOS1/RANBP9
ZHU_CMV_8_HR_UP	42	0.515965	1.87013	0.000908678	0.00318927	0.00151038	5392	tags=31%, list=11%, signal=28%	GCH1/ATF5/SLC39A14/ALAS1/SP100/RIPK1/NAMPT/HLA-E/IRF2/MX1/LGMN/PML/OAS2
KRIEG_KDM3A_TARGETS_NOT_HYPOXIA	200	0.392931	1.86912	0.000245339	0.00110632	0.000523932	7155	tags=28%, list=14%, signal=24%	SGK2/ACSL5/PRKAB2/SLC46A3/FURIN/THNSL1/TNFSF14/PGRMC1/TMEM140/SERPINA6/HIBCH/TMEM245/COLEC10/F2RL2/FKBP5/IL7/HDHD2/WDR7/CTSL/HACL1/GRAMD2B/DHX58/SAA2/ARSB/SAA1/C16orf87/LRRC47/CD40/IFIT3/THRB/FCAMR/STAT4/GOLGA4/NOL8/IFI44/VCAM1/SDSL/SIRT5/N4BP2L2/POLR3GL/LYRM9/TMEM106B/NFS1/ATM/RABEPK/ZNF451/GTPBP10/MRPL16/AKAP11/PKDCC/TUBGCP6/GBP1/NUDT3/ATPAF1/AASDHPPT/URGCP
CAIRO_HEPATOBLASTOMA_POOR_SURVIVAL	16	0.650386	1.86639	0.00333927	0.00979394	0.00463824	1885	tags=50%, list=4%, signal=48%	GHR/ALDH2/AQP9/C1S/APOC4/HPD/CYP2E1/APCS
REACTOME_INTERFERON_SIGNALING	200	0.392245	1.86585	0.000245339	0.00110632	0.000523932	12272	tags=46%, list=24%, signal=35%	GBP7/MT2A/IFNAR2/IFNAR1/NUP88/TRIM25/STAT2/XAF1/HERC5/SP100/TRIM14/CAMK2D/TRIM26/TRIM35/TYK2/HLA-E/IFIT2/TRIM2/IFIT1/IRF2/IRF7/IFIT3/TRIM10/MX1/IRF8/UBA7/IRF5/VCAM1/JAK1/KPNA3/NUP153/DDX58/PML/EIF2AK2/IRF9/NUP214/OASL/OAS2/POM121/TRIM38/PPM1B/IFITM3/PTPN1/PTPN11/GBP4/GBP5/EIF4G1/TRIM8/SAMHD1/MID1/TRIM22/GBP1/HLA-A/CAMK2B/IFI35/PTPN6/RSAD2/USP41/TRIM5/JAK2/OAS3/KPNA1/NUP210/IRF3/NUP85/IFNGR1/STAT1…
REACTOME_ATF6_ATF6_ALPHA_ACTIVATES_CHAPERONES	12	0.70762	1.86585	0.00314961	0.00934763	0.00442688	8808	tags=58%, list=17%, signal=48%	CALR/HSP90B1/HSPA5/ATF6/MBTPS1/MBTPS2/NFYC
BORCZUK_MALIGNANT_MESOTHELIOMA_DN	103	0.433346	1.8654	0.000232666	0.00110632	0.000523932	10661	tags=47%, list=21%, signal=37%	LCAT/CAPN3/CYP3A5/RDH16/PLA2G2A/FXYD1/CKMT2/STS/AOX1/AGFG2/C6/IGHM/ERCC5/XPNPEP2/CFP/SAT1/MEG3/THSD7A/ARAP1/DDT/CD38/PLXNB1/TCIRG1/N4BP2L2/TAP2/NCR1/ZBTB7A/ATG2A/C7/SF1/NKTR/ACSM1/HEXA/CASP10/NFIA/B4GALT1/PCSK7/PPT2/PTPRCAP/FKBP2/TRAF1/NEAT1/PTOV1-AS2/ACAP1/ANXA9/RBBP6/TRAF3IP3/PRB1
BIOCARTA_NKCELLS_PATHWAY	20	0.611847	1.86493	0.00270149	0.0081796	0.00387372	10778	tags=55%, list=21%, signal=43%	MAP2K1/PTK2B/PIK3R1/KLRC2/HLA-A/PIK3CA/SYK/KLRC3/PTPN6/KLRC1/KLRC4
NATSUME_RESPONSE_TO_INTERFERON_BETA_UP	70	0.464627	1.86488	0.000455477	0.00178292	0.000844363	9394	tags=39%, list=19%, signal=31%	IGF2/GRB14/PPARA/DST/TNFSF14/IGFBP3/IL11RA/AMPD2/ENO3/MAP3K14/HSP90B1/FAS/NFATC2/NCOR1/IL15RA/VCAM1/EIF2AK2/IFITM3/CDK13/AKT1/APAF1/MAP2K6/KDM5A/STAT1/CASP9/HLA-B/MAPK1
TSENG_IRS1_TARGETS_DN	130	0.415977	1.8635	0.000235018	0.00110632	0.000523932	9099	tags=38%, list=18%, signal=31%	SNTB1/H6PD/C11orf54/ANG/HSD17B11/GAS2/MAOA/IGFBP4/IL1R1/LONP2/DIAPH1/ENPP1/PHKA2/KNG1/EPHX1/HLX/TSPAN6/ITIH2/EFNB1/CMBL/VSNL1/SMAD6/FAH/TNXB/CD40/HGF/LIFR/NRP1/COL6A1/AOC3/TAPBP/MESD/IL6ST/PML/TRAPPC12/TRDC/FAM50B/CTDSP2/CCDC88A/CARHSP1/CST3/RSAD2/SNAI2/SIRT3/GGT5/GHITM/RBM10/C6orf203/SPARCL1
REACTOME_MYD88_CASCADE_INITIATED_ON_PLASMA_MEMBRANE	84	0.447572	1.86349	0.000230627	0.00110632	0.000523932	9448	tags=44%, list=19%, signal=36%	MAP2K1/PPP2R1B/IRAK2/MAPK14/RPS6KA3/NKIRAS1/IKBKG/SAA1/MEF2A/CUL1/MAP2K3/MYD88/ECSIT/PELI2/MAP3K7/NKIRAS2/DUSP6/IRAK4/DUSP3/RELA/AGER/PPP2CB/MAP2K7/TAB1/TAB2/RPS6KA2/MAPK8/MAP2K6/MEF2C/NFKBIB/PELI1/TAB3/PPP2R5D/ATF2/VRK3/MAPK1/ELK1
KYNG_DNA_DAMAGE_BY_GAMMA_AND_UV_RADIATION	81	0.450204	1.86338	0.000228885	0.00110632	0.000523932	6430	tags=31%, list=13%, signal=27%	LDHD/SLC6A1/GCLC/GADD45A/NNMT/FMO4/ERCC5/RPS6KA3/ITIH2/CXADR/CRHBP/IGFBP1/PHF3/SAA1/ATP6V0A1/AC026470.1/CCNC/EML4/VCAM1/IL10RB/ALDH9A1/CREBBP/AHCY/PLD6/C1QTNF6
REACTOME_THE_CITRIC_ACID_TCA_CYCLE_AND_RESPIRATORY_ELECTRON_TRANSPORT	173	0.400556	1.86335	0.000243309	0.00110632	0.000523932	8206	tags=26%, list=16%, signal=22%	SLC25A27/ETFDH/RXRA/PDK4/ADHFE1/ETFB/SDHA/COQ10A/SUCLG2/PDK2/MPC1/COX11/HAGH/ETFA/NDUFV1/NNT/TACO1/GSTZ1/LDHAL6B/PDPR/SDHD/SLC16A1/NDUFAF7/COX18/NDUFS1/FAHD1/DLD/ECSIT/SDHB/PDHA1/DMAC2L/D2HGDH/TRAP1/NDUFAF1/LRPPRC/FH/SCO1/ATP5F1A/ATP5F1D/MT-CO1/OGDH/UQCRC1/SURF1/SUCLA2/ACO2
KEGG_T_CELL_RECEPTOR_SIGNALING_PATHWAY	108	0.429114	1.86315	0.000232666	0.00110632	0.000523932	9416	tags=37%, list=19%, signal=30%	MAP2K1/VAV2/TEC/NFATC3/AKT2/FYN/MAPK14/CD4/MALT1/PIK3R1/IKBKG/CHP1/MAP3K14/PPP3CC/RAF1/CSF2/NFATC2/NFAT5/PPP3R1/SOS1/MAP3K7/PIK3CD/LCP2/RELA/PIK3R5/PAK2/AKT1/DLG1/PIK3CA/MAP2K7/SOS2/PTPRC/PTPN6/NFKBIB/CBLB/NCK1/MAP2K2/PRKCQ/MAPK1/PDPK1
ZHU_SKIL_TARGETS_UP	20	0.610793	1.86172	0.00270149	0.0081796	0.00387372	9607	tags=55%, list=19%, signal=45%	ECM2/EGFR/GADD45A/SEL1L/IGFBP1/ST5/FN1/ENPP2/DCN/HYOU1/VEGFA
HOLLERN_EMT_BREAST_TUMOR_UP	135	0.412587	1.86123	0.000236351	0.00110632	0.000523932	10234	tags=41%, list=20%, signal=33%	LRP1/ST3GAL2/CFL2/ARHGEF40/IGFBP4/ITGA5/AOX1/CCL23/IL18R1/FCGRT/PCOLCE/HLX/SPTBN1/GAMT/PLA2G15/PVR/CFP/C11orf24/ENO3/PLEKHA3/NAAA/RIPOR1/ZEB1/TGFBR2/MRC1/CSF1R/FCGR2B/FN1/NEK9/TSPAN4/EPB41L2/NRROS/NR2F1/C1QTNF6/ANGPTL2/WAS/LAMB1/SNX9/P3H1/PDGFRA/DCN/TJAP1/HSPG2/AXL/MATN2/FAM167B/EHBP1L1/TRAF1/SPI1/VSIG4/SEC23A/PLXND1/NRP2/POFUT2/TIMP2
MARIADASON_REGULATED_BY_HISTONE_ACETYLATION_UP	61	0.476592	1.86087	0.000452386	0.00178292	0.000844363	9467	tags=49%, list=19%, signal=40%	GALT/HGD/RETSAT/TGM2/SLC2A2/ABCD3/DUSP1/UBR4/CALCOCO1/ID2/ESAM/NOS3/DSE/PPP1R12C/MIR22HG/MBD4/MYO9B/RINT1/GGT7/CTNND1/RMC1/GAK/ENKD1/FBH1/DGKQ/CCN2/SBNO1/FNBP4/PDPK1/ACAP3
ZHU_CMV_24_HR_DN	84	0.446805	1.8603	0.000230627	0.00110632	0.000523932	4168	tags=26%, list=8%, signal=24%	ANPEP/IGF2/MBL2/ACO1/C1R/F7/SULT1E1/IGFBP3/TRAM2/AKR1C1/HSD17B2/MYLK/XPC/NR3C1/CRHBP/TMEM198B/TNFRSF1A/ABL1/NFIC/FTL/CXCL12/ID2
KEGG_GLYCOSAMINOGLYCAN_BIOSYNTHESIS_CHONDROITIN_SULFATE	22	0.596214	1.86019	0.0026936	0.00817525	0.00387166	11626	tags=50%, list=23%, signal=38%	CHST13/CHST7/B3GAT1/DSE/CHSY3/CHPF/CHST12/CHPF2/B3GAT2/CHST15/CSGALNACT2
REACTOME_COSTIMULATION_BY_THE_CD28_FAMILY	71	0.461819	1.85986	0.000454339	0.00178292	0.000844363	10674	tags=37%, list=21%, signal=29%	PPP2R1B/AKT2/FYN/CD4/PIK3R1/MAP3K14/PRR5/TNFRSF14/CSK/MAPKAP1/MTOR/LYN/PTPN11/PAK2/RICTOR/PPP2CB/AKT1/PPP2R5A/PIK3CA/PTPN6/PPP2R5D/PPP2R5E/PDPK1/HLA-DPA1/PPP2R5C/CD274
PID_HES_HEY_PATHWAY	48	0.498778	1.85974	0.000908884	0.00318927	0.00151038	8192	tags=48%, list=16%, signal=40%	GHR/TLE1/GATA4/GATA6/KDR/CD4/RCAN1/CAMK2D/ID1/AR/NCOR1/ARNT/STAT3/SPEN/NOTCH1/ASCL1/GAA/HEY2/CREBBP/YY1/CDKN1B/EP300/JAK2
ZHANG_ADIPOGENESIS_BY_BMP7	14	0.675001	1.8592	0.00358905	0.010345	0.00489924	8531	tags=57%, list=17%, signal=47%	GRB14/AKT2/IRS1/PIK3R1/GRB10/MAP3K5/AKT1/SGK1
RODRIGUES_NTN1_TARGETS_DN	159	0.403152	1.85917	0.000238493	0.00110632	0.000523932	9810	tags=43%, list=19%, signal=35%	GDA/VIL1/SEMA4G/CEBPA/SPAG9/TIAF1/MET/MMP15/HECTD1/DDC/CLDN2/RRBP1/RAPH1/MYLK/BIN1/KLF13/CCL15/SIGIRR/SULT1A1/LGALS4/SULT1A2/OGFR/ZFPM1/MAGI1/SPG7/ID1/MYH14/NAGLU/MKLN1/IRF8/TGFBR2/MLXIP/TNFRSF1B/SPEN/NFAT5/SULT1A3/FN1/VSIR/UBE2G2/IRF9/AHNAK/ARRB2/GAA/MINK1/EPB41L2/EPOR/DUSP6/PAPSS2/CDK13/PXN/PIK3CA/ZNF175/NECTIN2/RBM5/HSPG2/ZNF44/HNRNPD/NASP/IFNGR1/ARL4C/HTATIP2/CLOCK/FSCN1/PCDH1/ATRX/VEGFA/ARID…
REACTOME_GRB2:SOS_PROVIDES_LINKAGE_TO_MAPK_SIGNALING_FOR_INTEGRINS	15	0.662247	1.85909	0.00358905	0.010345	0.00489924	7101	tags=53%, list=14%, signal=46%	FGG/FGA/FGB/APBB1IP/FN1/SOS1/TLN1/ITGB3
REACTOME_DISEASES_OF_SIGNAL_TRANSDUCTION	385	0.362883	1.85843	0.000257599	0.00110632	0.000523932	9184	tags=33%, list=18%, signal=27%	FZD5/MAP2K1/EGFR/FGG/LRP5/FGA/FGB/KLB/FOXO1/PPP2R1B/RDH5/HDAC6/MET/IHH/MYO18A/SHH/NAPEPLD/RBP4/AKT2/FYN/PEBP1/PIK3AP1/TTR/FZD4/IRS1/SMAD4/KAT2B/SEL1L/QKI/MAP3K11/PIK3R1/PTEN/STAT5B/HDAC5/CAMK2D/LRP6/IRS2/OS9/FGFR4/TCF7L2/NRG1/RAF1/PRR5/SYVN1/APBB1IP/KDM7A/HGF/CCNC/MIB2/MAML3/FGFR3/NCOR1/CUL1/TGFBR2/STAT3/TNKS/AMER1/MPRIP/ERBB3/CSK/MAPKAP1/FOXO3/MTOR/CUX1/ARAF/FN1/BAG4/KSR1/SOS1/TRIM24/TLN1/FGFR1O…
REACTOME_MET_ACTIVATES_RAP1_AND_RAC1	11	0.724428	1.85832	0.00382883	0.0109019	0.00516296	6244	tags=45%, list=12%, signal=40%	MET/RAPGEF1/HGF/CRK/GAB1
DOANE_RESPONSE_TO_ANDROGEN_UP	182	0.395684	1.85832	0.000243962	0.00110632	0.000523932	8354	tags=35%, list=17%, signal=29%	ACAA1/ECHDC2/SLC37A4/ALDH4A1/H6PD/ZBTB16/AQP3/SORD/FMO5/PINK1/SEC14L2/PDIA5/CYP4F12/ZC3H13/DDC/FUT6/ACSM3/ST6GAL1/RNF125/AKT2/RRBP1/IQGAP2/MAFB/MVK/FKBP5/PDK2/CALR/COBL/SERINC5/ELOA-AS1/SRD5A1/PLEKHA1/CROT/AFF1/UGT2B11/MINDY3/ALCAM/AKAP6/ENDOG/MCCC2/NBPF14/ADAM20/AZGP1/SIL1/AHNAK/GADD45B/RND1/SCD/DDX31/PREP/AHCY/NEDD4L/GMDS/GNB5/THRAP3/CLCN3/TMEM33/MICAL2/GPS1/KDM4B/UBE4B/GUSBP11/MTMR9
ODONNELL_TARGETS_OF_MYC_AND_TFRC_UP	81	0.448842	1.85774	0.000228885	0.00110632	0.000523932	10130	tags=40%, list=20%, signal=32%	ALDH2/C1RL/SORBS2/ABAT/FUT6/PLCXD2/SATB1/IL13RA1/SAT1/IL4R/GSDMB/LLGL2/ID2/TNFRSF14/HSD11B1-AS1/YPEL2/CREBRF/MPEG1/TXNIP/LCP2/RCBTB2/TRIM22/UBE2H/IGHA1/CD72/CD37/AK1/LMO2/NEAT1/ANXA4/POLD4/ZNF594
MARSON_FOXP3_TARGETS_DN	52	0.491632	1.8575	0.000687758	0.00251515	0.00119113	6819	tags=29%, list=14%, signal=25%	GCH1/RCL1/PDE3B/MALT1/ALS2/MBP/DDT/GSTT2B/FAM107B/RAMP3/GADD45B/DUSP6/NABP1/CDV3/BTG1
PID_ECADHERIN_KERATINOCYTE_PATHWAY	21	0.601842	1.85681	0.00270942	0.0081983	0.00388258	8477	tags=43%, list=17%, signal=36%	EGFR/AKT2/FYN/PIK3R1/AJUBA/CTNND1/AKT1/PIK3CA/CDH1
REACTOME_BIOSYNTHESIS_OF_THE_N_GLYCAN_PRECURSOR_DOLICHOL_LIPID_LINKED_OLIGOSACCHARIDE_LLO_AND_TRANSFER_TO_A_NASCENT_PROTEIN	77	0.453494	1.85641	0.000229568	0.00110632	0.000523932	10926	tags=40%, list=22%, signal=32%	FUOM/ST3GAL2/NEU4/GNE/ST3GAL6/ST6GAL1/NUS1/GNPNAT1/ST3GAL1/ST3GAL5/ST8SIA3/ALG2/SLC35C1/NPL/CTSA/PMM1/CMAS/ST6GALNAC6/PGM3/GMDS/ST3GAL3/DOLPP1/ALG9/SLC17A5/ST6GALNAC3/MVD/MPI/ALG12/MPDU1/ALG11/SLC35A1
SMID_BREAST_CANCER_ERBB2_UP	151	0.405194	1.85506	0.000237586	0.00110632	0.000523932	6842	tags=32%, list=14%, signal=28%	ACSL1/ABCC2/C2orf72/HPX/ALDH4A1/LPCAT3/ASS1/AQP3/ABCC3/LRP1/FGG/LBP/FGB/WWC2/ABCC6/HMGCS2/QPRT/GOT1/P4HB/KYNU/MMP15/DDC/ORM2/CDK10/IL13RA1/PRMT7/ELL2/IGF2R/GSDMB/GCAT/AR/SLPI/NUDT4/IGKV1D-13/UGT2B11/PEX11A/ALCAM/TM7SF2/SLC2A10/SCGB1D2/SCD/DUSP6/PAPSS2/IGKV3-20/IGHV4-61/SEC24D/IGLC2/IGHV3-7/PLEKHA6
REACTOME_PROCESSING_OF_SMDT1	16	0.646337	1.85477	0.00378451	0.0108218	0.00512502	6882	tags=44%, list=14%, signal=38%	MICU3/MICU1/PMPCA/SPG7/PMPCB/AFG3L2/MAIP1
REACTOME_METAL_ION_SLC_TRANSPORTERS	26	0.570607	1.85407	0.00315173	0.00934763	0.00442688	3022	tags=35%, list=6%, signal=33%	SLC39A14/SLC39A5/SLC41A2/SLC30A10/SLC30A1/SLC31A1/CP/SLC40A1/SLC39A8
VALK_AML_CLUSTER_11	38	0.523309	1.85353	0.00137741	0.00453415	0.0021473	7319	tags=34%, list=15%, signal=29%	ALDH2/ASS1/DAPK1/KLF9/KYNU/FYN/ST3GAL5/GIMAP6/CISH/DPYSL2/MDFIC/GIMAP5/CLIC4
BRACHAT_RESPONSE_TO_CAMPTOTHECIN_UP	26	0.570361	1.85327	0.00337686	0.00985922	0.00466916	5987	tags=46%, list=12%, signal=41%	CBS/C1R/LRRC2/GRB10/EI24/TPP1/LPIN1/PMM1/ULK1/CCNG1/TOB1/TXNIP
BIOCARTA_RANKL_PATHWAY	14	0.672473	1.85224	0.004262	0.0119607	0.00566438	10949	tags=57%, list=22%, signal=45%	IFNAR2/IFNAR1/EIF2AK2/IRF9/RELA/MAPK8/TRAF6/FOSL1
NABA_ECM_REGULATORS	238	0.380881	1.85194	0.000247219	0.00110632	0.000523932	4127	tags=23%, list=8%, signal=21%	SERPIND1/FAM20A/SERPINA10/SERPINF1/AGT/ADAMTS13/SERPING1/F12/PCSK6/MASP2/HYAL1/PZP/CPN2/SERPINA11/F10/ITIH3/F7/HABP2/F9/F13B/FAM20C/SERPINA4/CTSO/SERPINF2/MASP1/LPA/MMP15/CTSZ/SERPINA6/ADAMTSL4/SERPINC1/ITIH4/SERPINA5/BMP1/TGM2/KNG1/ITIH1/F2/HRG/PLG/AMBP/ITIH2/SERPINA1/SERPINA7/CTSL/MEP1B/A2M/HTRA1/CTSS/PLOD1/CTSB/SLPI/SERPINA3/EGLN1/CTSA
BALDWIN_PRKCI_TARGETS_UP	40	0.515907	1.85193	0.00137552	0.00453415	0.0021473	7506	tags=40%, list=15%, signal=34%	SDC2/MPDZ/TDO2/AQP9/EIF4EBP2/ZBTB20/SELENOP/TGOLN2/TSPAN6/MEF2A/NEK9/SLC35A5/PAK2/NUDT3/TRIM56/SEPT11
REACTOME_SYNTHESIS_OF_PIPS_AT_THE_PLASMA_MEMBRANE	53	0.487421	1.85052	0.00114051	0.00386011	0.00182808	10252	tags=47%, list=20%, signal=38%	PIK3C2G/RAB14/MTM1/PIK3R1/PTEN/PLEKHA5/PI4K2B/PLEKHA3/PLEKHA1/PLEKHA2/PIK3CD/MTMR14/PI4K2A/INPP5K/PIK3R5/PLEKHA6/PIK3CA/INPP5D/PIP4K2A/MTMR9/PIK3R6/RAB5A/PLEKHA4/MTMR6/PIK3C2A
RIZKI_TUMOR_INVASIVENESS_2D_DN	62	0.471244	1.84991	0.000451162	0.00178292	0.000844363	5531	tags=34%, list=11%, signal=30%	VIL1/HSD17B4/IGFBP3/BBOX1/NUP88/UGT2B4/SELENOP/TTR/TRIM25/SEC24B/RAD54L2/CEMIP2/ENG/TRPC5/CDK6/ACAT2/MED16/ULK1/HERC1/OXA1L/FYB1
MARSON_FOXP3_TARGETS_UP	62	0.471026	1.84906	0.000451162	0.00178292	0.000844363	7672	tags=39%, list=15%, signal=33%	PLIN2/CD81/ECM1/EPHX1/MAPRE2/MBNL2/OSBPL9/HADH/ENO3/RSRP1/IRF8/CYB5A/PNP/SNX18/PDLIM2/ETS1/CELF2/RAMP1/NKG7/SAMHD1/RCSD1/TIAM1/EP300/MCL1
CASORELLI_APL_SECONDARY_VS_DE_NOVO_UP	38	0.52202	1.84896	0.00183655	0.0058205	0.00275649	6178	tags=32%, list=12%, signal=28%	CAPN3/CLU/NID1/ARHGEF40/HP/FCGRT/CPQ/MAVS/PTGER2/MARC1/TMX4/TRIM27
PID_ARF6_PATHWAY	35	0.530034	1.84895	0.00180873	0.00575963	0.00272766	7101	tags=46%, list=14%, signal=39%	EGFR/AGTR1/MET/IQSEC1/TSHR/EPHA2/HGF/FBXO8/GNAQ/ADRB2/GNA11/ARRB2/GNA14/EFNA1/PXN/ITGB3
REACTOME_CELL_SURFACE_INTERACTIONS_AT_THE_VASCULAR_WALL	192	0.390454	1.84783	0.000243784	0.00110632	0.000523932	10142	tags=38%, list=20%, signal=30%	SDC2/PROC/GRB14/PROS1/TNFRSF10D/ITGA5/SLC7A9/SDC1/FYN/APOB/IGHM/F2/CD99L2/CXADR/SIRPA/PIK3R1/MERTK/GLG1/TEK/TNFRSF10B/IGHV4-39/CEACAM1/SELE/IGLV1-47/FCAMR/IGHA2/SDC4/SLC16A1/ITGAL/ESAM/ITGAX/TSPAN7/FN1/SOS1/CD244/LYN/IGLV3-1/JAML/PTPN11/IGKV3-20/GAS6/DOK2/IGHV2-70/JCHAIN/CD99/IGKV2-28/IGLC2/IGHV3-7/PIK3CA/ITGB3/IGHV3-23/INPP5D/ITGB2/PPIL2/PTPN6/IGHV4-59/ANGPT2/IGHA1/IGKV1-39/ITGA4/SDC3/IGLV2-23/I…
PID_PI3KCI_PATHWAY	48	0.495364	1.84701	0.000908884	0.00318927	0.00151038	11692	tags=50%, list=23%, signal=38%	FYN/PLCG2/PIK3R1/PTEN/CYTH1/BLNK/PLEKHA1/FGR/FOXO3/BLK/PLEKHA2/PIK3CD/LYN/PIK3R5/PIK3CA/SYK/PIK3R6/SGK1/ARAP3/PDPK1/ZAP70/HCK/PIK3CB/BTK
BIOCARTA_LEPTIN_PATHWAY	11	0.720018	1.84701	0.00427928	0.011977	0.00567212	5036	tags=64%, list=10%, signal=57%	PRKAB2/LEPR/CPT1A/PRKAG2/PRKAA1/PRKAG3/PRKAB1
KEGG_ERBB_SIGNALING_PATHWAY	87	0.440826	1.84681	0.000230521	0.00110632	0.000523932	9448	tags=44%, list=19%, signal=36%	MAP2K1/EGFR/PRKCA/SHC2/AKT2/PLCG2/PIK3R1/STAT5B/CAMK2D/NRG1/RAF1/ABL1/CRK/ERBB3/MTOR/ARAF/SOS1/PIK3CD/GAB1/PIK3R5/PAK2/STAT5A/AKT1/PIK3CA/CDKN1B/MAP2K7/CAMK2B/SOS2/MAPK8/CBLB/RPS6KB2/PRKCB/NCK1/MAP2K2/RPS6KB1/NRG4/MAPK1/ELK1
BIOCARTA_HER2_PATHWAY	23	0.584909	1.84597	0.0033723	0.00985922	0.00466916	9394	tags=61%, list=19%, signal=50%	IL6R/MAP2K1/EGFR/PIK3R1/RAF1/STAT3/ERBB3/IL6ST/SOS1/ESR1/PIK3CA/EP300/CARM1/MAPK1
BIOCARTA_GHRELIN_PATHWAY	13	0.68472	1.84592	0.00449135	0.0124403	0.00589149	2646	tags=38%, list=5%, signal=36%	IGFALS/IGF1/IGFBP4/IGFBP3/IGFBP1
BROWNE_HCMV_INFECTION_18HR_DN	182	0.392841	1.84497	0.000243962	0.00110632	0.000523932	8968	tags=37%, list=18%, signal=31%	IGF2/ABCA8/ASL/DST/GAS2/CTIF/RDH5/UGT2B7/PCYT2/CTSO/PTPRD/ACOX2/SHH/ACSM3/FYN/EPHX1/TNS2/HSD17B2/MYLK/INSIG1/IRS1/ADH1A/ALDOB/CD5L/CRHBP/PTEN/DUSP1/ALDH7A1/FAH/ID1/OPLAH/VASH1-AS1/SLC22A18/DDT/TNIP1/EXT1/ID2/COL6A1/CEMIP/PLXNB1/CBFA2T3/EMILIN1/TEAD1/DMAC2L/MEGF8/GAS6/PTGIS/ANGPTL2/ERVK-28/ADD3/COL6A2/DEFA1/RAD23A/RPS6KA2/RBMS3/DHRS12/SURF1/SEMA5A/DHFR/AXL/RECK/FKBP8/CARM1/FADS1/PRKCB/YLPM1/MAP2K5…
BIOCARTA_MYOSIN_PATHWAY	11	0.71891	1.84417	0.0045045	0.0124546	0.00589827	11317	tags=64%, list=22%, signal=49%	PRKCA/GNAQ/ARHGAP5/ARHGEF1/ROCK1/PRKCB/PPP1R12B
BROWNE_HCMV_INFECTION_20HR_DN	102	0.429308	1.84362	0.000233481	0.00110632	0.000523932	8910	tags=41%, list=18%, signal=34%	ACAA1/ACO1/DST/RRAS2/ALDH6A1/TFPI/DIAPH2/ATP13A3/GBE1/TRAM2/MGLL/SYNE1/ECH1/FST/TMCO6/GSTO1/CRADD/TRIM2/ST5/TNKS/MAP3K5/MT1B/OGA/TNFRSF14/SLC22A4/SIPA1L1/MBNL1/NR1D2/LPP/SLC35E2A/RND3/TRIM22/AHR/ADD3/MACF1/SEPT11/PKIG/AXL/ANXA2P1/SVIL/RHOBTB3/CCN2
WIEMANN_TELOMERE_SHORTENING_AND_CHRONIC_LIVER_DAMAGE_UP	11	0.718297	1.84259	0.0045045	0.0124546	0.00589827	927	tags=55%, list=2%, signal=54%	CYP4A22/CES1/ALAD/CYP2C8/ORM1/ARNTL
REACTOME_ORGANIC_CATION_TRANSPORT	10	0.737916	1.8425	0.00489106	0.0132902	0.00629403	5319	tags=50%, list=11%, signal=45%	SLC22A1/SLC22A3/RSC1A1/SLC22A18/SLC22A4
HADDAD_T_LYMPHOCYTE_AND_NK_PROGENITOR_UP	81	0.445073	1.84215	0.000228885	0.00110632	0.000523932	5155	tags=31%, list=10%, signal=28%	MPDZ/HLF/CFH/PHLPP1/KLF9/FOXO1/TJP2/ADGRG6/CDC14B/ALDH1A1/PTPRD/RIOK3/CRHBP/TRO/PHF3/MEG3/GRK5/HSPA5/CHN2/WASHC4/SMARCA2/CACNB2/SMAD7/FOXO3/MYH10
FARMER_BREAST_CANCER_CLUSTER_7	20	0.604295	1.84191	0.00337686	0.00985922	0.00466916	5752	tags=35%, list=11%, signal=31%	GHR/ESRP2/ECI2/AR/ALCAM/RND1/SCD
REACTOME_SIALIC_ACID_METABOLISM	33	0.535236	1.84127	0.00269784	0.00817914	0.0038735	5270	tags=36%, list=10%, signal=33%	ST3GAL2/NEU4/GNE/ST3GAL6/ST6GAL1/ST3GAL1/ST3GAL5/ST8SIA3/NPL/CTSA/CMAS/ST6GALNAC6
WANG_BARRETTS_ESOPHAGUS_UP	52	0.48729	1.84109	0.000917011	0.00319147	0.00151143	6899	tags=40%, list=14%, signal=35%	CLU/ACADS/ABHD2/FMO5/AKR1C3/FABP1/HSD17B2/CCL15/ALDOB/TM4SF4/DDX19B/CCL14/VIPR1/FUCA1/TCN2/COL6A1/ST6GALNAC6/LYN/ITPK1/OLFM4/PXN
HUANG_FOXA2_TARGETS_DN	38	0.519298	1.83932	0.00206612	0.00646787	0.00306307	4284	tags=34%, list=9%, signal=31%	CFI/STEAP3/PROS1/CXCL2/LEPR/STS/ACOX2/ST6GAL1/TGM2/SMAD6/CEACAM1/CTSB/COL6A1
REACTOME_TRANSPORT_OF_VITAMINS_NUCLEOSIDES_AND_RELATED_MOLECULES	44	0.502631	1.83836	0.000914495	0.00319092	0.00151116	7108	tags=39%, list=14%, signal=33%	SLC35D1/SLCO2B1/SLCO1B3/SLC16A2/SLC28A1/SLC35B4/LCN12/SLCO1B1/ALB/SLC27A4/SLC35C1/SLC33A1/SLCO1A2/SLC35D2/SLCO4C1/SLC35B3/SLCO3A1
PID_NFKAPPAB_ATYPICAL_PATHWAY	17	0.630481	1.83804	0.00402055	0.0113717	0.00538545	7333	tags=41%, list=15%, signal=35%	MAPK14/CSNK2A2/PIK3R1/ARRB2/RELA/PIK3CA/SYK
SHEPARD_BMYB_MORPHOLINO_UP	212	0.383612	1.83707	0.000246245	0.00110632	0.000523932	10280	tags=36%, list=20%, signal=29%	IGF2/UPB1/RDH10/BCO2/SCARB1/HNF4A/ARG1/CPN1/GLUD1/ABAT/HPGD/PARP4/NAPEPLD/C4A/WNT11/PCK1/FABP1/AK3/SETD7/CNDP2/GCSH/SLC31A1/RIOK3/QKI/ARRDC3/UCK1/FST/RHBG/MBP/TCTEX1D1/CRLS1/CYP11A1/SIAE/PNPO/SIRT1/NCLN/DNAJA2/ZNF330/ITM2B/BMP2/FOXO3/LYRM1/BGN/KLC1/MPP1/RPP14/SLC25A28/CCNG1/SRSF4/NCAPD3/EPDR1/RBM25/DUS3L/PARP3/NR6A1/METAP1/SND1/ITFG2/HNRNPD/AC022966.1/EFHD2/TMPO/DNAJA3/C6orf203/SPPL2B/ZC3H3/LAMP2…
BIOCARTA_IL3_PATHWAY	15	0.654223	1.83656	0.00471063	0.0129026	0.00611043	8192	tags=53%, list=16%, signal=45%	MAP2K1/STAT5B/IL3/RAF1/SOS1/STAT5A/PTPN6/JAK2
SEITZ_NEOPLASTIC_TRANSFORMATION_BY_8P_DELETION_UP	73	0.453647	1.8358	0.00045798	0.00178292	0.000844363	6803	tags=42%, list=14%, signal=37%	LIPG/CLU/SORD/BCHE/SORL1/ABCG2/HERC6/MAPRE2/HERC5/CX3CL1/PDLIM5/IFIT2/IFIT1/IFIH1/IFIT3/MX1/IFI44/ID2/UGT1A10/TLR4/PNP/DDX58/OASL/ZC3HAV1/OAS2/TENT5A/DDX60/NR2F1/IFI44L/UGT1A8/GBP1
SENESE_HDAC1_AND_HDAC2_TARGETS_UP	241	0.377167	1.83572	0.000248262	0.00110632	0.000523932	5692	tags=25%, list=11%, signal=22%	IL6R/GCH1/SLC7A2/PPARA/CES1/C3/EGFR/HHIP/G0S2/SCG5/SORBS2/CAPN5/AADACP1/MAOA/KLHL21/KYNU/HECTD1/AADAC/KDSR/TGM2/LMAN1/IRAK2/TMOD1/ANTXR2/ROBO4/DOCK4/NUS1/PPTC7/SERPINA1/IL13RA2/SH2B3/PPIF/NAMPT/ST3GAL1/SAA1/TNFRSF10B/RRAGD/PCGF5/LINC02535/PPARGC1B/CSF2/SLC16A1/LDB2/TGFBR2/LARP4/ADGRL4/GPAT3/FGFRL1/BMP2/ADAMTS17/ATP11B/FAM9B/NFKBIZ/IL6ST/FN1/BICD2/MYCT1/CPEB4/MEGF10/TRIM38
GALE_APL_WITH_FLT3_MUTATED_UP	58	0.474697	1.83536	0.000682283	0.00251082	0.00118908	9895	tags=48%, list=20%, signal=39%	MYO1B/SLC46A3/CFH/RRAS2/SLC25A13/TRMT11/RFTN1/SOCS2/C6orf62/GIMAP6/VPS54/CHD9/ATF6/MIS12/GEMIN4/LUC7L3/STX16/SRSF11/HNRNPH1/LARS2/HTATIP2/WIPF1/AHI1/DELE1/CDC16/PSMF1/PHF11/ATR
KRIGE_AMINO_ACID_DEPRIVATION	29	0.548783	1.83391	0.00312012	0.00926733	0.00438885	2408	tags=28%, list=5%, signal=26%	CBS/PSAT1/ATF5/ASS1/GADD45A/CTH/FYN/SESN2
REACTOME_SYNTHESIS_OF_PIPS_AT_THE_LATE_ENDOSOME_MEMBRANE	11	0.714848	1.83375	0.00495495	0.013407	0.00634934	10252	tags=91%, list=20%, signal=72%	MTMR4/MTM1/VAC14/PIK3R4/PIK3C3/PIKFYVE/FIG4/MTMR7/MTMR9/PIK3C2A
BIOCARTA_SPRY_PATHWAY	17	0.628953	1.83359	0.00446728	0.0123809	0.00586338	5134	tags=35%, list=10%, signal=32%	MAP2K1/EGFR/SPRY2/PTPRB/RAF1/SOS1
GENTILE_UV_RESPONSE_CLUSTER_D7	37	0.51983	1.83332	0.00182066	0.00578583	0.00274007	9609	tags=54%, list=19%, signal=44%	RRAS2/TLE1/PLPP3/MET/PGRMC2/SPOP/IL4R/TNFRSF1A/CUL1/MORC3/CEBPD/PTPN1/STX7/EFCAB14/CTDSP2/RBMS1/NASP/TBL1X/CDK14/PUDP
DARWICHE_PAPILLOMA_PROGRESSION_RISK	74	0.451656	1.83296	0.000229253	0.00110632	0.000523932	7583	tags=41%, list=15%, signal=34%	HGD/FMO5/GJB2/CYP3A4/XDH/SLC38A10/MFAP3L/CLYBL/STOM/GPR37/TMOD1/XPC/DOCK4/RELN/CALCOCO1/ABHD14B/MAN2A2/ACTL6B/NUDT12/PLEKHM2/GSTM1/R3HCC1L/ATG2A/SGTA/GGT7/NEK4/NR6A1/C16orf96/RGS14/LGALS2
REACTOME_PYRUVATE_METABOLISM	31	0.540593	1.83294	0.0024708	0.0075643	0.00358232	5315	tags=35%, list=11%, signal=32%	RXRA/PDK4/PDK2/MPC1/HAGH/GSTZ1/LDHAL6B/PDPR/SLC16A1/DLD/PDHA1
REACTOME_RUNX3_REGULATES_NOTCH_SIGNALING	14	0.665425	1.83283	0.00583221	0.0154241	0.00730457	13205	tags=71%, list=26%, signal=53%	KAT2B/MAML3/NOTCH1/CREBBP/KAT2A/EP300/RBPJ/MAMLD1/MAML1/RUNX3
REACTOME_SIGNALING_BY_BRAF_AND_RAF_FUSIONS	65	0.46331	1.83276	0.000682283	0.00251082	0.00118908	9767	tags=48%, list=19%, signal=38%	MAP2K1/FGG/FGA/FGB/PEBP1/QKI/CAMK2D/RAF1/APBB1IP/KDM7A/MPRIP/CSK/ARAF/FN1/KSR1/TRIM24/TLN1/ZC3HAV1/ARRB2/CALM1/AKAP9/TENT4A/ITGB3/SND1/CAMK2B/CLCN6/JAK2/MAP2K2/MAPK1/MARK3/ARRB1
ALTEMEIER_RESPONSE_TO_LPS_WITH_MECHANICAL_VENTILATION	122	0.413679	1.83241	0.000235516	0.00110632	0.000523932	10068	tags=37%, list=20%, signal=30%	HPX/GCH1/GDA/CD14/RDH5/CCL23/MT2A/STAT2/AKAP12/GK/RCAN1/ST3GAL1/IFIT2/SAA1/PLA2G7/IRF7/IL1RN/IFIH1/CSF2/CMPK2/CTPS1/LILRB3/NFKBIZ/OAS2/NFIL3/IL1R2/SOD2/CEBPD/LCP2/TFPI2/SLC15A3/TREX1/USP41/FGL2/TRIM5/OAS3/TNFAIP2/STAT1/MEFV/PLEK/TLR2/TNFAIP3/CCR1/SLA/MS4A6A
GRAHAM_CML_DIVIDING_VS_NORMAL_QUIESCENT_DN	93	0.432421	1.83221	0.000231374	0.00110632	0.000523932	9091	tags=37%, list=18%, signal=30%	HLF/VNN1/CXCL2/ADGRG6/TFPI/CTSO/SORL1/AKR1C3/IL18R1/HLX/SPTBN1/TSPAN6/GABPB1-IT1/CRHBP/OPTN/FNBP1/TCF7L2/CD40/NFAT5/PPFIBP1/MIR22HG/SOD2/DUSP6/DMD/ENPP4/BIRC3/TRIM22/TNFSF10/PTPRC/IFI16/SVIL/MPZL2/BAALC/ERG
NEMETH_INFLAMMATORY_RESPONSE_LPS_UP	83	0.441307	1.83171	0.000462107	0.00178812	0.000846823	7072	tags=31%, list=14%, signal=27%	GCH1/MAP2K1/FURIN/CCL23/MT2A/TRIM25/GK/ETS2/SAT1/APBB1IP/IL1RN/CFLAR/TPST1/SLPI/IFRD1/TNFRSF1B/TNIP1/KPNA3/RNF11/FCGR2B/PNP/PML/CEBPD/LCP2/LILRA5/HCLS1
WONG_MITOCHONDRIA_GENE_MODULE	217	0.381305	1.83154	0.00024667	0.00110632	0.000523932	7232	tags=24%, list=14%, signal=21%	CHDH/AGMAT/PCK2/CYP27A1/SFXN5/GLUD1/HMGCS2/ALDH6A1/MAOA/ATP13A3/SCP2/ECHS1/GOT2/ACAT1/CPT1A/ACADSB/GCDH/DBT/AUH/DECR1/COX11/PPIF/AIFM1/CP/LONP1/GSTO1/NDUFV1/NIPSNAP1/SLC40A1/CRAT/GSTZ1/TOMM70/CRYZ/GCAT/PCCB/CYB5A/COX18/SLC25A1/SFXN2/MCCC2/DLD/SDHB/PDHA1/SOD2/NFS1/SLC25A22/NDUFAF1/LRPPRC/FH/HINT2/SCO1/MCEE/GIMAP5
ZHAN_MULTIPLE_MYELOMA_CD1_AND_CD2_UP	92	0.433027	1.83135	0.000230894	0.00110632	0.000523932	8342	tags=34%, list=17%, signal=28%	ACSL1/SLC17A9/GCH1/ALDH2/GPR88/ALDH6A1/PAN2/CPEB3/FERMT2/MAN1C1/QKI/RBL2/CHPT1/GPR155/TNKS/IL10RA/RFC1/PARVG/KIF21A/KCNJ3/ERO1B/FADS3/SLC38A2/ATG14/PGM3/BTG1/LEPROT/KLHL28/NASP/CBLB/TBL1X
ROSS_AML_WITH_MLL_FUSIONS	80	0.44398	1.83107	0.000229568	0.00110632	0.000523932	9632	tags=46%, list=19%, signal=37%	CES1/CFB/FES/FBP1/APOC2/CCL23/ALDH3A2/PHKA2/SIRPA/CTSL/CPM/GLG1/HK3/GOLGA8N/WHAMMP3/TPP1/PBX3/CUL1/SOCS2/PLD3/ITGAX/ITGA7/ADCY9/MBNL1/TDRD7/NKG7/KMT2A/GUSB/PREB/SNX10/LRMP/MEF2C/RNH1/DEXI/SLC9A6/MRPL34/HOXA5
RODRIGUES_THYROID_CARCINOMA_DN	77	0.447287	1.831	0.000229568	0.00110632	0.000523932	9526	tags=40%, list=19%, signal=33%	CLDN1/ST3GAL6/DUSP10/F2RL2/PHLDB2/HIPK2/AIG1/RNF217/NAMPT/PGPEP1/PTPRK/ZNF512B/ERCC6L2/CDK6/ALCAM/FN1/DMD/C5orf56/NABP1/ANKRD28/IGF2BP2/KANSL1/ATXN1/TAB2/UGCG/ARHGAP35/SAMD9/DICER1/CDC42EP3/ZNF207/PCBP2
PLASARI_TGFB1_TARGETS_10HR_DN	249	0.374497	1.83086	0.00024728	0.00110632	0.000523932	8043	tags=35%, list=16%, signal=30%	METTL7A/CDH2/LMO7/PALMD/PDK4/ACADM/SORD/SORBS2/MBNL3/ADGRG6/MAN1A1/CYP7B1/GAS2/CNKSR3/ARHGAP20/ADHFE1/DHRS3/ZFHX4/IGF1/LGR4/PTPRD/TSHZ1/IDH1/DDC/CCL23/FOXP2/PPP1R3C/EPHX1/IRS1/ACSS2/PLEKHG1/ELOVL6/HERC6/GAMT/FAT4/ARRDC3/PIK3R1/PTEN/PEG3/TCEA3/TMEM53/EDNRB/MRGPRF/MGST1/THSD7A/SLC40A1/TCF7L2/MEIS2/IFIT2/TRIM2/IL1RN/IFIT3/SMARCA2/LDB2/LIFR/ZIC1/RSPO3/MRC1/VCAM1/PER3/IL6ST/KLHL24/EIF2AK2/LRRN3/PDLIM2…
RAMALHO_STEMNESS_UP	196	0.385718	1.83042	0.000244918	0.00110632	0.000523932	10617	tags=37%, list=21%, signal=30%	GHR/MTMR10/ACADM/RIDA/PPP2R1B/PLS3/GAS2/RCL1/ELP2/SUCLG2/GCSH/ERCC5/ELOVL6/RNFT1/BACH1/CENPC/PRPSAP1/ALDH7A1/TBRG1/TOM1L1/PAFAH2/ROCK2/ABCB1/MRPS31/GCAT/GCLM/FBXO8/ANKRD17/SOCS2/RPUSD4/ACAT2/MRPS2/RARS2/SH3D19/ZC3H14/MED23/INTS5/KANK3/TRIP6/FBXO38/AC118549.1/PSMD12/RPP14/TJP1/SMAD1/USP9X/SLC38A2/GAB1/RNF145/ARCN1/MDFIC/FHL1/CWC22/RAD23B/PKD2/ESF1/DICER1/LSG1/RRN3/USP10/MRPL34/SMARCAD1/FKBP11/EIF3…
BUCKANOVICH_T_LYMPHOCYTE_HOMING_ON_TUMOR_UP	19	0.607019	1.82931	0.00379973	0.0108455	0.00513622	11279	tags=63%, list=22%, signal=49%	C3/CALD1/CFLAR/SKAP2/MYCBP2/ESR1/GBP1/AKAP10/NOL7/PRPF38B/MICAL1/CCDC102B
REACTOME_UPTAKE_AND_FUNCTION_OF_ANTHRAX_TOXINS	11	0.71292	1.8288	0.00495495	0.013407	0.00634934	9008	tags=73%, list=18%, signal=60%	MAP2K1/FURIN/ANTXR2/MAP2K3/CALM1/MAP2K7/MAP2K6/MAP2K2
KEGG_GALACTOSE_METABOLISM	26	0.562815	1.82875	0.00427735	0.011977	0.00567212	8371	tags=50%, list=17%, signal=42%	GALT/UGP2/PGM1/GALK1/GANC/G6PC/HK3/PFKL/GAA/GALE/GCK/GALK2/B4GALT1
REACTOME_ENERGY_DEPENDENT_REGULATION_OF_MTOR_BY_LKB1_AMPK	28	0.55247	1.82785	0.00382797	0.0109019	0.00516296	6012	tags=43%, list=12%, signal=38%	PRKAB2/PRKAG2/PRKAA1/RRAGD/STRADB/PRKAG3/STRADA/PPM1A/MTOR/PRKAB1/STK11/TSC1
LIU_PROSTATE_CANCER_DN	489	0.348845	1.82741	0.000265887	0.00110958	0.000525477	5520	tags=25%, list=11%, signal=23%	LCAT/IGF2/CYP3A5/CLU/ALDH2/METTL7A/ACACB/FBXO17/SERPINF1/HLF/GPLD1/AQP3/ACAA2/PDK4/ABCC3/MFSD2A/DOK4/GATM/C1R/SMOC1/C1S/RARRES2/SLC47A1/ZCCHC14/CFL2/DST/SORBS1/ECHDC1/KCNJ8/PLPP3/NID1/NR3C2/ARHGEF40/GSTA1/MASP1/MET/ACOX2/ITGA1/ANO1/SH3PXD2A/ALDH3A2/MAGI2-AS3/SDC1/STOM/SERPINA5/RBP4/FYN/MME/BDH2/NPR2/GPC6/CYP3A7/MYLK/AKAP12/CCDC50/KLF11/FERMT2/INPP1/EPAS1/PEX14/EPHA2/TNS1/SRD5A2/STARD4/TMEM200B/PI…
REACTOME_IRAK4_DEFICIENCY_TLR2_4	11	0.711654	1.82555	0.00518018	0.0139599	0.00661119	12768	tags=91%, list=25%, signal=68%	CD14/TIRAP/MYD88/TLR4/IRAK4/TLR2/CD36/TLR1/BTK/TLR6
PID_FAK_PATHWAY	59	0.470667	1.82534	0.00067904	0.00251082	0.00118908	8108	tags=37%, list=16%, signal=31%	MAP2K1/ELMO1/ITGA5/FYN/PIK3R1/RAPGEF1/AL162171.1/ROCK2/RAF1/CRK/ARHGEF7/ARHGEF28/SOS1/TLN1/GIT2/ETS1/PXN/PIK3CA/WASL/BCAR1/MAPK8/ARHGAP35
RAO_BOUND_BY_SALL4	219	0.379487	1.82435	0.000247097	0.00110632	0.000523932	11123	tags=45%, list=22%, signal=35%	SLC39A14/KIFC3/HSD17B11/TMEM220/FGD4/PLIN2/EPHX2/IDH1/ITGA1/ZDHHC14/PRSS48/TRIM25/SPRY2/AKAP12/DENND2C/ABHD17B/ARRDC3/MACO1/CCDC38/GNPNAT1/SSBP3/STK38/INSIG2/COBL/SPIC/DDAH1/CWF19L2/PDGFC/TRIM2/NBR1/MAP4K4/ADIPOR2/SFTPD/LMBRD2/SLC44A1/MIB2/PYROXD1/ARNT/ETFRF1/WHAMM/TLK1/USP48/SLC25A1/CHD2/LYRM1/SEC16A/IL6ST/FN1/KDM2B/UBL3/ARHGEF18/TMEM64/GJB3/ZC3HAV1/SERBP1/C2orf88/MSANTD2/DUSP6/PRDX6/HEXIM1/SLC3…
IVANOVA_HEMATOPOIESIS_EARLY_PROGENITOR	438	0.351821	1.82433	0.00026062	0.00110632	0.000523932	10834	tags=37%, list=22%, signal=29%	SHMT1/ACSM2B/CLUH/PANK1/LBP/SLC22A3/ECHDC3/HPN/RETSAT/PDIA5/SLC38A10/FDX1/MTMR4/CENPV/AK4/PSD4/SLC25A15/PPID/DBT/GCSH/QDPR/GOPC/XKR8/BCKDHB/HERC6/MGAT2/HDHD2/EXTL2/OGFR/MTRF1/RIPK1/ALS2/HIBADH/GNPNAT1/PPIF/PRPSAP1/FPGS/ALDH7A1/DEPTOR/L3MBTL3/BCKDHA/GSTO1/LYSMD4/GRIA3/ARSB/CLASP1/SRD5A1/CHN2/TRABD2B/NAXD/IMPA2/RAMP3/GNPTAB/VARS2/MACROD1/CDK6/MPP6/SFXN2/GSTM4/FASTKD1/RNF130/AARS/SPPL2A/CUX1/WDR36/N…
ROYLANCE_BREAST_CANCER_16Q_COPY_NUMBER_UP	64	0.462632	1.82367	0.000681973	0.00251082	0.00118908	7669	tags=44%, list=15%, signal=37%	GPT2/KIFC3/DOK4/AC092118.1/GOT2/PLCG2/CSNK2A2/RBL2/SLC38A7/CX3CL1/C16orf87/TCF25/ZNF276/RSPRY1/COQ9/CMIP/ADGRG5/CNOT1/CHD9/CETP/KATNB1/PLLP/DEF8/GAN/AFG3L1P/FAM192A/NLRC5/CFAP20
PID_RXR_VDR_PATHWAY	25	0.566776	1.82357	0.00382194	0.0108956	0.00515995	3466	tags=32%, list=7%, signal=30%	RXRA/PPARA/NR1H4/ABCA1/NR1H3/PPARG/RXRB/THRB
MELLMAN_TUT1_TARGETS_DN	47	0.49146	1.8232	0.000912617	0.00319092	0.00151116	6546	tags=40%, list=13%, signal=35%	ALDH2/APOE/KLF12/CAT/SHANK3/AKR1C3/CPEB3/BNIP3/HAGH/NDUFS1/GSTK1/AKR1A1/BLOC1S5/KLF7/HMOX1/KLF10/PACSIN3/RBM25/TXNDC11
IZADPANAH_STEM_CELL_ADIPOSE_VS_BONE_DN	107	0.420251	1.8224	0.000232612	0.00110632	0.000523932	7944	tags=36%, list=16%, signal=30%	EHBP1/SERPING1/PCSK6/PALMD/HYAL1/N4BP2L1/EPB41L4B/SORBS2/CFB/TLE1/DHRS3/IGF1/AKR1C1/PRKAG2/TMEM245/AKAP12/FGF21/PPTC7/ID1/STAT4/AR/SLPI/SLC22A23/PLPP1/MYH10/PPP4R4/SMAD1/NEK1/CELF2/TXNIP/PTGIS/DOCK11/LAMB1/PLOD2/NUAK1/RAB12/NFIB/CISD1
REACTOME_INTRA_GOLGI_TRAFFIC	44	0.498269	1.8224	0.000914495	0.00319092	0.00151116	12166	tags=55%, list=24%, signal=41%	GOLIM4/MAN1A1/MAN2A1/MAN1C1/COG8/RAB33B/CYTH1/MAN2A2/CUX1/COG3/MAN1A2/STX16/GOLGA5/CYTH4/RGP1/BET1L/TRIP11/COG4/COG1/RIC1/GOSR2/NAPA/RAB39A/COG6
YU_MYC_TARGETS_DN	54	0.477748	1.82215	0.00114129	0.00386011	0.00182808	10332	tags=43%, list=21%, signal=34%	ABCA1/CD1D/MYO7A/GUCD1/MGST1/LIFR/IL10RA/BLK/UNC93B1/ERO1B/SIPA1/ARHGEF1/ACP5/BTG1/MACF1/RBMS1/PTPRC/CD37/PRKCB/ZCCHC7/TXNDC16/IGKV4-1/KLF3
REACTOME_REGULATION_OF_TLR_BY_ENDOGENOUS_LIGAND	19	0.604558	1.82189	0.00379973	0.0108455	0.00513622	4296	tags=42%, list=9%, signal=39%	FGG/LBP/FGA/FGB/CD14/APOB/SFTPD/TLR4
BERTUCCI_MEDULLARY_VS_DUCTAL_BREAST_CANCER_UP	206	0.381151	1.82041	0.00024558	0.00110632	0.000523932	6702	tags=27%, list=13%, signal=24%	CBS/ACSL5/APOE/AGMAT/C1RL/PCSK6/MAP2K1/C1S/NR1H3/PCOLCE2/RCL1/C1RL-AS1/GALM/SCML1/ADORA2A/HERPUD1/MINPP1/C9orf72/AIFM2/PPIF/TAPBPL/MRTO4/LAP3/DESI1/PLCL2/ZNF512B/CTSS/CCDC69/SNHG26/EPB41/SKAP1/NSMCE4A/IL15RA/ERAP1/TNFRSF1B/ATXN7/VCAM1/CD38/PSAP/TNFRSF14/ZCCHC9/ITGB7/SPATA5L1/DTX3L/ELL/ERO1B/SOD2/BTN3A1/IL32/CEBPD/GBP4/GBP5/CUL2/BIRC3/TREX1/IGLC2
YAMASHITA_LIVER_CANCER_STEM_CELL_UP	47	0.490629	1.82012	0.000912617	0.00319092	0.00151116	4186	tags=36%, list=8%, signal=33%	FZD5/CLDN1/SEMA4G/HNF4A/PIK3C2G/GADD45A/IGF1/CLDN2/GYS2/MYLK/MERTK/DUSP1/TCF7L2/ARHGEF15/FGFR3/PIK3C3/MAP3K5
BIOCARTA_EPO_PATHWAY	19	0.603937	1.82002	0.00379973	0.0108455	0.00513622	9448	tags=53%, list=19%, signal=43%	MAP2K1/STAT5B/RAF1/SOS1/EPOR/STAT5A/MAPK8/PTPN6/JAK2/ELK1
KEGG_OTHER_GLYCAN_DEGRADATION	16	0.634225	1.82002	0.0048976	0.0132902	0.00629403	11136	tags=56%, list=22%, signal=44%	NEU4/MAN2C1/MAN2B2/FUCA1/ENGASE/HEXA/MANBA/HEXB/FUCA2
REACTOME_ASPARAGINE_N_LINKED_GLYCOSYLATION	303	0.364794	1.8199	0.000252143	0.00110632	0.000523932	10083	tags=37%, list=20%, signal=30%	ASGR1/SEC16B/FUOM/F5/ST3GAL2/MIA2/NEU4/MAN1A1/GNE/AMFR/ST3GAL6/CTSZ/ST6GAL1/MGAT1/ASGR2/MGAT4B/LMAN1/MAN2A1/MAN1C1/SEC24B/USO1/SEL1L/SPTBN1/INS/MGAT2/COG8/NUS1/SERPINA1/CALR/GNPNAT1/EDEM1/OS9/ST3GAL1/RNF185/FUCA1/ST3GAL5/ST8SIA3/MAN2A2/MAGT1/ALG2/SYVN1/SLC35C1/NPL/SEC24A/MANEA/SPTBN2/CAPZA3/SPTBN5/CTSA/PMM1/TRAPPC6B/TUBB2A/MCFD2/STX17/GANAB/SEC16A/COG3/SAR1B/CMAS/MOGS/SEC31A/ST6GALNAC6/PPP6R3/PRK…
REACTOME_FOXO_MEDIATED_TRANSCRIPTION_OF_CELL_DEATH_GENES	16	0.634134	1.81975	0.0048976	0.0132902	0.00629403	10136	tags=56%, list=20%, signal=45%	FOXO1/PINK1/FOXO3/STK11/CREBBP/BCL6/EP300/NFYC/FOXO4
MORI_PLASMA_CELL_UP	52	0.481529	1.81933	0.00137552	0.00453415	0.0021473	9556	tags=42%, list=19%, signal=34%	TRAM2/LARP1B/SURF4/RRBP1/LMAN1/MGAT2/DNAJB9/EBP/MAGT1/CTSB/SLC44A1/UBXN4/FILIP1/CCDC47/IGKC/SCFD2/SLC30A7/SEC11C/IGHA1/HTATIP2/HDLBP/IP6K1
BIOCARTA_STRESS_PATHWAY	24	0.570104	1.81864	0.00404676	0.0114114	0.00540424	7787	tags=46%, list=15%, signal=39%	MAPK14/RIPK1/IKBKG/CRADD/MAP3K14/TNFRSF1A/MAP2K3/TANK/RELA/MAPK8/MAP2K6
LOPEZ_MESOTHELIOMA_SURVIVAL_UP	12	0.689344	1.81766	0.00607424	0.015947	0.00755223	3809	tags=50%, list=8%, signal=46%	IL6R/N4BP2L1/ADH1B/CREBL2/CRYBG3/UBA7
REACTOME_NF_KB_ACTIVATION_THROUGH_FADD_RIP_1_PATHWAY_MEDIATED_BY_CASPASE_8_AND_10	12	0.689199	1.81728	0.00607424	0.015947	0.00755223	7931	tags=58%, list=16%, signal=49%	TRIM25/RIPK1/IKBKG/IFIH1/MAVS/DDX58/CASP10
REACTOME_SIGNALING_BY_TGF_BETA_FAMILY_MEMBERS	101	0.423798	1.81723	0.00023245	0.00110632	0.000523932	7794	tags=32%, list=15%, signal=27%	FURIN/CGN/MTMR4/BMP10/SMAD4/GREM2/FST/SMAD6/PARD3/SKI/GDF2/CCNC/NCOR1/TGFBR2/PPM1A/ACVR1B/SMAD7/BMP2/ACVR2B/ARHGEF18/ACVR1C/CCNT2/ZFYVE9/SMAD1/ACVR2A/CDK9/USP9X/NEDD4L/USP15/RNF111/MEN1/FSTL1
SCHEIDEREIT_IKK_INTERACTING_PROTEINS	55	0.475344	1.817	0.000914495	0.00319092	0.00151116	7045	tags=38%, list=14%, signal=33%	IRS1/EPAS1/FKBP5/CYLD/RIPK1/MAP3K14/CARD10/IRF7/MAVS/ZFAND5/MAP3K3/FOXO3/TANK/EIF2AK2/MAP3K7/CREBBP/ATM/TRIM27/RELA/ESR1/HTT
PID_TGFBR_PATHWAY	53	0.478514	1.8167	0.00136861	0.00452755	0.00214417	11944	tags=51%, list=24%, signal=39%	ITCH/SMAD4/SPTBN1/OCLN/TGFBR2/WWP1/SMAD7/SOS1/PML/MAP3K7/ARRB2/ZFYVE9/NEDD4L/PPP2CB/TAB1/TAB2/RNF111/SMURF1/PPP2R2A/CCN2/RPS6KB1/PDPK1/SMAD3/DAB2/YAP1/XIAP/PPP1R15A
BROWNE_HCMV_INFECTION_24HR_DN	143	0.399298	1.81655	0.000237192	0.00110632	0.000523932	8147	tags=34%, list=16%, signal=28%	PRKAB2/SLC16A2/PKLR/ABCA8/DST/NR1H3/RRAS2/PRKCA/ACOX1/RDH5/CPS1/DIAPH2/CTSO/ALDH1A1/IGFBP3/ACSM3/SUCLG2/HIPK2/DNMBP/PTEN/BACH1/CALD1/DDAH1/GRIA3/MGMT/CFLAR/TGFBR2/EXT1/CROCC/CEMIP/BLK/TM7SF2/TEAD1/CCNG1/GAS6/SSH1/TRAPPC12/ERVK-28/AP4S1/BTG1/GJA4/BTN3A3/SEPT11/RPS6KA2/SEMA5A/AP3S2/FIG4/RECK
RIGGINS_TAMOXIFEN_RESISTANCE_DN	219	0.377845	1.81645	0.000247097	0.00110632	0.000523932	8694	tags=38%, list=17%, signal=31%	CD302/STEAP3/ACADM/APOL6/ABAT/RAPGEF2/CTSO/ACOX2/MFAP3L/AKR1C1/SERPINA5/ELOVL2/ALB/PIK3R1/PYGL/SATB2/SLC1A1/PLEKHA5/INSIG2/NAMPT/PDLIM5/TACC1/LAP3/NNT/SCARB2/DGLUCY/SERINC5/HS2ST1/CARD10/GSAP/SLC5A3/IFIH1/IFIT5/NAB1/SERPINA3/NUDT4/PSD3/SNRK/UBXN4/SYBU/UGT1A10/ALCAM/NPY1R/NBPF14/AZGP1/IL6ST/IL17RB/CLK1/RAI14/EIF2AK2/IRF9/TMEM123/MAP3K7/PRNP/IFITM3/DDX60/PDS5A/CEBPD/PTPN11/CISH/SCCPDH/AKAP11/EFR3A/…
REACTOME_GLYCOGEN_STORAGE_DISEASES	16	0.63298	1.81644	0.0048976	0.0132902	0.00629403	2084	tags=38%, list=4%, signal=36%	SLC37A4/GBE1/GYS2/PPP1R3C/GYG2/G6PC
REACTOME_PEPTIDE_HORMONE_METABOLISM	88	0.432667	1.81606	0.000230681	0.00110632	0.000523932	3589	tags=23%, list=7%, signal=21%	ANPEP/AGT/CES1/ENPEP/CPB2/MYRIP/BCHE/INHBC/INHBE/IGF1/GATA4/CTSZ/MME/CLTRN/DPP4/INS/PCSK1/TCF7L2/PLA2G7/REN
BOYLAN_MULTIPLE_MYELOMA_PCA3_UP	76	0.4448	1.81563	0.000459348	0.00178292	0.000844363	7202	tags=36%, list=14%, signal=30%	ABTB2/SLC47A1/TFPI/SLC30A1/MT2A/RNF125/GPHN/PPARGC1A/AIG1/MTHFD2L/ACOT2/KIAA1671/ABCB1/RRAGD/KIF13A/TMEM38B/CDC42BPB/CDK6/ALCAM/KLF7/GAREM1/TSPAN4/SMAD1/PLLP/RNF43/ATXN1/ADSSL1
YAN_ESCAPE_FROM_ANOIKIS	22	0.581843	1.81535	0.00426487	0.0119616	0.0056648	8694	tags=41%, list=17%, signal=34%	CFB/STAT2/CX3CL1/IRF7/MX1/VCAM1/EIF2AK2/RSAD2/STAT1
LINDSTEDT_DENDRITIC_CELL_MATURATION_C	62	0.462372	1.81509	0.000902323	0.00318295	0.00150739	7843	tags=39%, list=16%, signal=33%	ALDH2/N4BP2L1/FOXO1/NID1/IGFBP4/MGLL/FERMT2/DEPP1/CX3CL1/S1PR1/IL4R/ROCK2/STAT3/SOCS2/TUBB2A/JAK1/ARID5A/AOC1/NFIL3/POLR2E/ENPP4/STAT5A/UGCG/GTF2E2
PID_ER_NONGENOMIC_PATHWAY	40	0.505637	1.81506	0.00206327	0.00646465	0.00306155	8631	tags=42%, list=17%, signal=35%	GNAO1/PIK3R1/ROCK2/GNAI2/GNAI1/GNAQ/PLCB2/GNA11/NOS3/SOS1/GNA14/ESR1/AKT1/PIK3CA/GNG2/BCAR1/MSN
GROSS_HYPOXIA_VIA_ELK3_DN	156	0.394907	1.81473	0.000238095	0.00110632	0.000523932	7740	tags=30%, list=15%, signal=26%	ANPEP/ERRFI1/SLC39A14/C3/FGB/GADD45A/ANGPTL6/CTH/TNFRSF10D/TSHZ1/GBE1/ZBTB20/GSPT2/SPRY2/AKAP12/JMJD1C/DEPP1/RCAN1/FST/IL13RA1/SAT1/PDLIM5/HSPA5/ADIPOR2/RAMP3/SLPI/IFRD1/AFF1/ZNF330/SCAF11/USP47/CEBPB/CHIC2/OAS2/EPS15/PRDM2/RND1/NFIL3/ETS1/NEDD4L/LILRA5/CD93/PNRC1/RAD23B/ASCC2/ZFP36/DHRS9
REACTOME_TRAF6_MEDIATED_NF_KB_ACTIVATION	24	0.56833	1.81298	0.00404676	0.0114114	0.00540424	8002	tags=46%, list=16%, signal=39%	TRIM25/NKIRAS1/IKBKG/SAA1/IFIH1/MAVS/DDX58/NKIRAS2/RELA/AGER/NFKBIB
REACTOME_DEATH_RECEPTOR_SIGNALLING	141	0.399188	1.81268	0.000236407	0.00110632	0.000523932	7931	tags=31%, list=16%, signal=26%	ARHGEF10L/VAV2/FGD4/ARHGEF26/ARHGEF12/TNFRSF10D/ARHGEF40/FGD2/CYLD/NGEF/RIPK1/IKBKG/ITSN1/OTULIN/TNFRSF1A/TNFRSF10B/ARHGEF15/FAS/CFLAR/AKAP13/ARHGEF7/BIRC2/MYD88/RTN4/SPPL2A/KALRN/NGFR/BAG4/SOS1/ARHGEF18/MAP3K7/MADD/USP2/RELA/ARHGEF1/BIRC3/TAB1/TNFSF10/TAB2/TIAM1/SOS2/MAPK8/SMPD3/CASP10
REACTOME_DISORDERS_OF_TRANSMEMBRANE_TRANSPORTERS	177	0.387554	1.81202	0.000243191	0.00110632	0.000523932	5605	tags=23%, list=11%, signal=21%	ABCC2/ABCB11/GCKR/ABCG5/AVPR1A/SLCO1B3/ABCG8/ERLIN1/ABCB4/ABCA1/ABCC6/ABCD4/SLC7A9/NUP88/APOA1/SLC3A1/SEL1L/SLC2A2/SLCO1B1/ALB/SLC34A1/SLC1A1/SLC2A9/CP/OS9/SLC40A1/RNF185/SLC27A4/SLC22A18/SLC6A2/SLC35C1/SLC33A1/SLC16A1/SLC12A6/SLC4A4/NUP153/SLC2A10/ABCC9/NUP214/PSMD12/POM121
TAVOR_CEBPA_TARGETS_UP	51	0.481037	1.81129	0.00137646	0.00453415	0.0021473	8061	tags=39%, list=16%, signal=33%	ACSL1/GCH1/SERPINF1/ARG1/PTPN3/AKAP12/EXTL2/IL1RN/GGH/ID2/HMOX1/TANK/NFIL3/SOD2/GBP1/BTG1/TRDC/PTPRC/MLC1/FIG4
NAKAYAMA_FRA2_TARGETS	44	0.495199	1.81118	0.00114312	0.00386071	0.00182836	9591	tags=48%, list=19%, signal=39%	MT1H/TFPI/MT1F/LGR4/SLC30A1/MT2A/DUSP10/SPSB3/LGMN/RBM33/ZFAND5/CREBRF/KLHL24/NR1D2/GPR18/BCL6/SGK1/ING3/WIPF1/SLC20A1/DBP
KAYO_CALORIE_RESTRICTION_MUSCLE_DN	87	0.431894	1.8094	0.000230521	0.00110632	0.000523932	5080	tags=24%, list=10%, signal=22%	CYP2D7/ABCC2/ACAA2/G0S2/CRYAA/CKMT2/GOT2/SLC23A2/APOA4/ECH1/RCAN1/HADHB/HADH/NNT/FBP2/GNAQ/PEX19/DDO/TSPAN7/ELL/MBTPS1
REACTOME_MTOR_SIGNALLING	39	0.50788	1.80939	0.0022941	0.00706029	0.00334363	9877	tags=49%, list=20%, signal=39%	PRKAB2/PRKAG2/AKT2/PRKAA1/RRAGD/STRADB/PRKAG3/STRADA/PPM1A/MTOR/PRKAB1/STK11/TSC1/EIF4G1/AKT1/RPTOR/AKT1S1/RPS6KB1/CAB39
REACTOME_NRAGE_SIGNALS_DEATH_THROUGH_JNK	59	0.466403	1.8088	0.000905387	0.00318655	0.0015091	7693	tags=34%, list=15%, signal=29%	ARHGEF10L/VAV2/FGD4/ARHGEF26/ARHGEF12/ARHGEF40/FGD2/NGEF/ITSN1/ARHGEF15/AKAP13/ARHGEF7/KALRN/NGFR/SOS1/ARHGEF18/ARHGEF1/TIAM1/SOS2/MAPK8
REACTOME_CHOLESTEROL_BIOSYNTHESIS	25	0.561831	1.80766	0.0044964	0.0124469	0.00589463	4966	tags=44%, list=10%, signal=40%	SC5D/MSMO1/MVK/LSS/EBP/PLPP6/CYP51A1/ACAT2/LBR/TM7SF2/DHCR24
KEGG_NATURAL_KILLER_CELL_MEDIATED_CYTOTOXICITY	132	0.402046	1.80687	0.000236351	0.00110632	0.000523932	7878	tags=33%, list=16%, signal=28%	MAP2K1/VAV2/PRKCA/TNFRSF10D/SHC2/NFATC3/IFNAR2/PTK2B/IFNAR1/FYN/PLCG2/PIK3R1/SH3BP2/CHP1/HLA-E/TNFRSF10B/PPP3CC/FAS/RAF1/CSF2/NFATC2/ITGAL/PRF1/NFAT5/PPP3R1/KLRK1/ARAF/SOS1/NCR1/CD244/PIK3CD/KLRC2/PTPN11/LCP2/PIK3R5/HLA-A/PIK3CA/TNFSF10/SYK/KLRC3/SOS2/ITGB2/PTPN6
KOKKINAKIS_METHIONINE_DEPRIVATION_96HR_UP	118	0.409869	1.80663	0.000234412	0.00110632	0.000523932	7531	tags=36%, list=15%, signal=30%	BHMT/DAPK1/DPYD/PRKCA/GADD45A/IGFBP4/IL1R1/IGFBP3/SC5D/SMAD4/PTEN/GPX3/GSTO1/IGF2R/TNFRSF10B/FAS/MGMT/ABL1/HGF/CFLAR/MYD88/SMAD7/BMP2/POLG/IL6ST/TANK/BGN/GSTM1/SMAD1/CREBBP/POLR2E/SPTAN1/GTF2H4/IGFBP2/CDKN1B/DCTD/APAF1/TLR3/PDGFRA/RAD23B/DCN/PERP
REACTOME_CELL_CELL_JUNCTION_ORGANIZATION	65	0.456655	1.80644	0.000682283	0.00251082	0.00118908	3575	tags=26%, list=7%, signal=24%	CDH2/CLDN1/ANG/CLDN14/CLDN23/CADM1/CLDN2/NECTIN3/CLDN15/PVR/CLDN22/PARD3/CDH5/AFDN/CLDN20/CLDN16/CLDN5
LINDSTEDT_DENDRITIC_CELL_MATURATION_B	49	0.481972	1.80633	0.00136861	0.00452755	0.00214417	9744	tags=45%, list=19%, signal=36%	PALM2-AKAP2/GADD45A/OPTN/MAP3K14/CFLAR/SDC4/IL15RA/TNIP1/ID2/N4BP2L2/USP12/LYN/HIVEP1/BIRC3/BTG1/PNRC1/MARCKS/TNFAIP2/TRAF1/STK4/NR4A3/TNFAIP3
SCHAEFFER_SOX9_TARGETS_IN_PROSTATE_DEVELOPMENT_UP	21	0.585455	1.80626	0.00406412	0.0114465	0.00542089	3685	tags=43%, list=7%, signal=40%	RDH10/TLE1/MAOB/FST/MBP/SLC39A8/TRIM2/TRMT9B/FGFR3
KAAB_FAILED_HEART_ATRIUM_UP	35	0.517713	1.80597	0.00271309	0.00820253	0.00388458	8352	tags=43%, list=17%, signal=36%	CYP3A5/FGA/APOM/MMP15/EFNA2/PLA2G15/MAP3K11/TMEM259/ATP6V0A1/ATXN7L1/HNF1B/BRD3/ARID1A/TOB2/FKBP8
ZIRN_TRETINOIN_RESPONSE_WT1_UP	23	0.571885	1.80487	0.00494604	0.0134062	0.00634893	10866	tags=52%, list=22%, signal=41%	DHRS3/IGFBP3/ITGA1/DLC1/AKAP12/NAV2/CAPN7/PDGFRA/LRRC32/ETV1/RARB/SMAD3
KEGG_GLYCEROPHOSPHOLIPID_METABOLISM	77	0.440828	1.80456	0.000459137	0.00178292	0.000844363	10409	tags=45%, list=21%, signal=36%	LCAT/LPCAT3/GPAM/GPD1/PLA2G2A/AGPAT3/PLPP3/PCYT2/PEMT/PLA2G12B/AGPAT2/PLD1/PLA2G15/CHKA/CHPT1/ETNK2/CRLS1/GPAT3/PLA2G1B/JMJD7-PLA2G4B/PLPP1/ADPRM/PHOSPHO1/ETNK1/CDIPT/PCYT1A/PGS1/DGKQ/CHKB/AGPAT1/CDS2/LPGAT1/PISD/PTDSS1/PLA2G4A
ABBUD_LIF_SIGNALING_1_DN	26	0.55527	1.80424	0.00495272	0.013407	0.00634934	8080	tags=54%, list=16%, signal=45%	DCAF11/DDC/FOXA2/BCKDHB/EFNA2/SYTL4/ALCAM/TSPAN7/AHNAK/ENPP2/ANKRD40/ARID1A/PELI1/SUCLA2
MA_MYELOID_DIFFERENTIATION_DN	41	0.499806	1.80356	0.00228415	0.00704354	0.0033357	5310	tags=37%, list=11%, signal=33%	CES1/HNF4A/CD14/VAV2/NFATC3/SMAD4/LATS2/KIF1B/CRAT/PLA2G7/STAT4/ZFAND5/VCAM1/EIF2AK2/NOTCH1
REACTOME_FC_EPSILON_RECEPTOR_FCERI_SIGNALING	185	0.382325	1.80327	0.000241313	0.00110632	0.000523932	12894	tags=44%, list=26%, signal=33%	VAV2/TEC/NFATC3/FYN/PLCG2/MALT1/PIK3R1/IKBKG/IGHV4-39/ITPR2/IGLV1-47/NFATC2/CUL1/PPP3R1/TXK/SOS1/PSMD12/MAP3K7/LYN/CALM1/IGLV3-1/CDC34/LCP2/IGKV3-20/IGHV2-70/RELA/PAK2/IGKV2-28/IGLC2/IGHV3-7/PIK3CA/MAP2K7/TAB1/RASGRP2/TAB2/SYK/IGHV3-23/MAPK8/IGHV4-59/TAB3/IGKV1-39/IGLV2-23/IGHV3-48/IGKV2-30/PRKCQ/IGKV1-5/FCER1A/MAPK1/PDPK1/IGKV2D-30/PSMF1/IGLV1-40/IGLV1-51/IGKV1-12/IGLV2-11/IGKV4-1/IGHV3-33/PSME3…
PID_CERAMIDE_PATHWAY	44	0.493	1.80313	0.00114312	0.00386071	0.00182836	7700	tags=41%, list=15%, signal=35%	MAP2K1/SPHK2/RIPK1/AIFM1/SMPD1/CRADD/TNFRSF1A/MAP4K4/RAF1/BAG4/KSR1/EIF2AK2/MADD/RELA/BIRC3/AKT1/MAPK8/SMPD3
RODRIGUES_THYROID_CARCINOMA_UP	15	0.642017	1.8023	0.00672948	0.0174037	0.00824209	10443	tags=67%, list=21%, signal=53%	PHYH/ARHGAP42/GNAI1/PAG1/TMEM64/FAM89A/ECI1/FKBP11/BORCS7/MCRIP2
TAKEDA_TARGETS_OF_NUP98_HOXA9_FUSION_8D_DN	200	0.378849	1.80213	0.000245339	0.00110632	0.000523932	7191	tags=31%, list=14%, signal=27%	TDO2/CLU/ALDH2/MAF/PDK4/SLCO2B1/F5/SLC41A2/CD14/HSD11B1/NDRG2/PID1/AMFR/RAPGEF2/CCL23/MARCO/RAPH1/EPAS1/DOCK4/CD163/SERPINA1/KIAA1147/HTRA1/ZDHHC19/IGF2R/HK3/C16orf87/LINC02535/PLA2G7/SOBP/NPL/CTSB/AKAP13/SLPI/LGMN/DNAJC3/NRP1/MRC1/C1QC/JAZF1/SLC16A7/CUX1/FCGR2B/GPNMB/AOC1/FYB1/ATP10D/PRNP/IL1R2/ETS1/LCP2/C1QB/SLC30A7/GSDME/CR1/ETNK1/BCL6/GJA4/SRPX/CAMK1D/NKTR/DEFA1
LIAN_LIPA_TARGETS_3M	61	0.461525	1.80204	0.00113097	0.00383349	0.00181548	10068	tags=46%, list=20%, signal=37%	MARCO/MAFB/FKBP5/CD5L/CFP/SPIC/SLC40A1/SAA1/PLA2G7/CTSB/C1QC/FCGR2B/HMOX1/GPNMB/MPEG1/CD244/IL1R2/C1QB/SLC15A3/LILRA5/ACP5/UTRN/C1QA/TNFAIP2/IGSF6/KLRB1/CCR1/MS4A6A
REACTOME_REGULATION_OF_GENE_EXPRESSION_IN_LATE_STAGE_BRANCHING_MORPHOGENESIS_PANCREATIC_BUD_PRECURSOR_CELLS	16	0.627669	1.8012	0.00556545	0.0148359	0.00702604	10318	tags=62%, list=20%, signal=50%	ONECUT1/KAT2B/MAML3/HNF1B/NOTCH1/CREBBP/KAT2A/EP300/RBPJ/MAMLD1
EPPERT_CE_HSC_LSC	40	0.501738	1.80106	0.00320954	0.00948529	0.00449207	5282	tags=38%, list=10%, signal=34%	HLF/DAPK1/ADGRG6/TFPI/PLSCR4/RNF125/SPTBN1/SMARCA1/CRHBP/ABCB1/TMEM38B/SOCS2/CACNB2/ALCAM/FRMD4B
KEGG_PROXIMAL_TUBULE_BICARBONATE_RECLAMATION	23	0.570677	1.80106	0.00517086	0.0139429	0.0066031	4777	tags=35%, list=9%, signal=31%	SLC38A3/PCK2/GLS2/GLUD1/SLC25A10/PCK1/GLUD2/SLC4A4
PID_AR_TF_PATHWAY	52	0.476583	1.80064	0.00137552	0.00453415	0.0021473	8679	tags=40%, list=17%, signal=33%	RXRA/CEBPA/FOXO1/NR2C1/MAPK14/KAT2B/NR3C1/RXRB/SMARCA2/AR/SIRT1/TRIM24/CREBBP/NCOA2/NR2C2/EP300/MAPK8/RXRG/MAP2K6/CARM1/TMPRSS2
GARGALOVIC_RESPONSE_TO_OXIDIZED_PHOSPHOLIPIDS_BLACK_UP	35	0.51615	1.80052	0.00293918	0.00879125	0.00416339	7823	tags=34%, list=16%, signal=29%	GCH1/ERRFI1/CCDC82/F2RL2/LATS2/ATP11B/AKIRIN2/CLK1/NFE2L2/PRNP/CCDC93/ZNF44
PID_RET_PATHWAY	39	0.505219	1.79991	0.00252351	0.00771056	0.00365159	7693	tags=41%, list=15%, signal=35%	DOK4/SHANK3/PRKCA/IRS1/PRKACA/PIK3R1/IRS2/GRB10/CRK/SOS1/PTPN11/GAB1/PXN/PIK3CA/BCAR1/MAPK8
REACTOME_RUNX2_REGULATES_BONE_DEVELOPMENT	31	0.530609	1.79909	0.00426774	0.0119625	0.00566522	6502	tags=35%, list=13%, signal=31%	MAF/HDAC6/IHH/SMAD4/SATB2/SMAD6/ABL1/AR/HEY2/SMAD1/RBM14
LEE_LIVER_CANCER_ACOX1_UP	65	0.454731	1.79883	0.000682283	0.00251082	0.00118908	3995	tags=29%, list=8%, signal=27%	EHHADH/PALMD/ABHD2/SORBS2/GIPC2/SPON2/PLIN2/MT2A/VNN3/APCS/TM4SF4/CTSL/ETS2/IGFBP1/CBR1/CIDEC/SLC16A1/SLPI/PEX11A
KEGG_JAK_STAT_SIGNALING_PATHWAY	155	0.391705	1.79868	0.000238493	0.00110632	0.000523932	8192	tags=33%, list=16%, signal=28%	GHR/IL6R/LEPR/IL11RA/IFNAR2/IFNAR1/AKT2/SPRY2/STAT2/CNTFR/IL7/PIK3R1/STAT5B/IL13RA2/IL3/IL13RA1/STAT6/IL22RA1/TYK2/IL4R/PIM1/CSF2/STAT4/LIFR/IL12RB2/STAT3/IL15RA/SOCS2/IL10RA/IL10RB/JAK1/IFNK/IL6ST/SOS1/IRF9/PIK3CD/IL2RB/CREBBP/EPOR/PTPN11/PIK3R5/CISH/STAT5A/AKT1/PIK3CA/TSLP/SOS2/EP300/PTPN6/CBLB/JAK2
OUYANG_PROSTATE_CANCER_PROGRESSION_UP	21	0.582158	1.79609	0.00406412	0.0114465	0.00542089	8759	tags=57%, list=17%, signal=47%	MUC20/CD81/IGHM/AVPI1/TIRAP/STAT3/DUSP16/JAK1/ARHGAP5/SYK/STAT1/PRKCB
REACTOME_ACTIVATION_OF_PPARGC1A_PGC_1ALPHA_BY_PHOSPHORYLATION	10	0.719092	1.7955	0.00689195	0.0177476	0.00840498	5036	tags=60%, list=10%, signal=54%	PRKAB2/PRKAG2/MAPK14/PPARGC1A/PRKAG3/PRKAB1
RATTENBACHER_BOUND_BY_CELF1	425	0.346692	1.79508	0.000259202	0.00110632	0.000523932	6383	tags=24%, list=13%, signal=22%	CYP2D7/CROCCP2/PLIN4/TTC38/TRPM8/SPRYD4/TAT/SEC16B/CHAD/FAM99A/MSRA/F7/CFL2/SNX29P2/ABAT/ZADH2/OIT3/WDR59/PDZD8/FBP1/AGFG2/ONECUT1/LRRC8A/NAPEPLD/SLC38A11/IFNAR2/ENPP1/CLYBL/SH3TC1/BMP1/ERN1/RILP/MIR99AHG/GCDH/NBPF12/IL10RB-DT/LINC00261/SPATS2L/APLP2/HERC5/EP400P1/SP100/AKAP2/SLC25A30/FAM171A1/L3MBTL4/GTF2IP7/TM4SF4/NACC2/SMCO4/CACFD1/RTP3/RREB1/VXN/STIM1/MBP/TTC17/IPMK/SLC1A2/USP30/ABHD14B/WBP4/…
LIM_MAMMARY_STEM_CELL_DN	408	0.348452	1.79504	0.00025974	0.00110632	0.000523932	7878	tags=31%, list=16%, signal=26%	ALDH5A1/SLC46A3/SHMT1/NAT2/EHHADH/CLDN1/TST/ALAD/GJB2/BDH1/SORBS2/CD14/HPN/CGNL1/IVD/CPT2/SORL1/KYNU/SEPSECS/ACOT13/CGN/LSR/IBTK/TK2/RORC/ACY1/TGM2/REEP6/IQGAP2/HOMER2/TMEM56/HDHD3/SIGIRR/PXMP2/COASY/NGEF/SFXN1/CACFD1/MYO5B/KIF1B/CAMSAP3/SH3BP2/TSPAN33/PI4K2B/KIAA1147/CHPT1/HAGH/DHX58/COBL/SYTL4/RREB1/OS9/STAT6/GRTP1/OPLAH/TOM1L1/MYH14/ARRDC4/SLC22A18/VIPR1/NHLRC3/PLPP6/CEACAM1/ACAD10/C11orf71/EP…
SUNG_METASTASIS_STROMA_UP	109	0.412575	1.79492	0.000233263	0.00110632	0.000523932	9820	tags=40%, list=19%, signal=33%	ASS1/RDH10/PROS1/FURIN/PINK1/PDIA5/DHRS1/AKR1C1/CD81/CALR/EDEM1/TMEM47/RAF1/PLOD1/SDC4/SLC16A1/PSD3/ALCAM/EPS8/PRRC2B/IGIP/SNX1/GAA/SCD/CPEB2/DUSP6/JMY/HEXIM1/SEC24D/ADAM10/FHL1/PLOD2/CTDSP2/HSPG2/TMEM263/HMGCS1/SPSB1/SNAI2/P4HA1/CDC42EP3/MAPK1/UACA/NEAT1/ANXA4
ZHANG_ANTIVIRAL_RESPONSE_TO_RIBAVIRIN_DN	46	0.486058	1.79485	0.00113947	0.00385953	0.00182781	6794	tags=33%, list=13%, signal=28%	RRAS2/AADAC/DUSP10/PPP1R3C/CENPC/PPP3CC/CFLAR/SOCS2/IRF5/TUBB2A/FOXO3/PTGER2/SMAD1/CAV2/AHR
RUTELLA_RESPONSE_TO_CSF2RB_AND_IL4_UP	338	0.3547	1.79482	0.000250752	0.00110632	0.000523932	6590	tags=26%, list=13%, signal=23%	SDC2/APOE/FZD5/SERPINF1/ACO1/PHYH/C1S/HSD11B1/MAOA/PLPP3/QPRT/RDX/APOC1/IL1R1/ST3GAL6/KYNU/GOT2/DIPK1A/ELOA/SC5D/AKR1C1/MGLL/CD81/STOM/TGM2/ALAS1/HOMER2/DOCK4/CREG1/PLEKHA5/PVR/RFTN1/CYTH1/TMEM131L/IL13RA1/DEPTOR/OPTN/TMBIM6/FNBP1/SLC1A2/ST3GAL1/ZDHHC18/CCL18/MAP3K14/CRYZ/MAP4K4/AC026470.1/SLC5A3/GCLM/CFLAR/TPST1/SDC4/CREBL2/PSD3/CYB5A/GGH/TBC1D4/WNT5B/NRP1/RGL1/TBC1D13/RDH11/FCHSD2/FASTKD1/JAK1/…
BIOCARTA_NO2IL12_PATHWAY	15	0.639341	1.79479	0.00717811	0.018331	0.00868125	3830	tags=27%, list=8%, signal=25%	CD4/TYK2/STAT4/IL12RB2
LIM_MAMMARY_STEM_CELL_UP	468	0.343687	1.79406	0.000261575	0.00110632	0.000523932	8147	tags=32%, list=16%, signal=27%	COL18A1/LCAT/MPDZ/APOE/SERPINF1/AQP9/SERPING1/TSHZ2/PXDC1/HGFAC/PROS1/LRP1/EVA1A/EGFR/GOLIM4/HS3ST3A1/RARRES2/MTSS1/NT5E/DST/SORBS1/CPNE8/PLS3/ARHGAP20/FXYD1/MAOB/ARNTL/KLHL21/LIMS2/IGFBP4/IGFBP3/NNMT/FAM184A/ITGA1/CADM1/C19orf12/SH3TC1/MME/BMP1/PPP1R3C/MYLK/FERMT2/PCOLCE/CHST7/EPAS1/MALT1/SLC27A3/RUSC2/AMOTL1/TNS1/AKAP2/ARHGAP24/NECTIN3/DCUN1D3/IQCJ-SCHIP1/QKI/EFNB1/DIPK2A/PEG3/VSNL1/BACH1/EDNRB…
OISHI_CHOLANGIOMA_STEM_CELL_LIKE_UP	345	0.353825	1.79367	0.000253807	0.00110632	0.000523932	10323	tags=33%, list=20%, signal=26%	FBXO17/AGT/HABP2/ALDH1B1/KANK1/PROX1/MAOB/ATP13A3/GOT1/BPHL/IL11RA/ONECUT1/PCCA/ALDH3A2/SERPINA6/ZBTB20/MAN2A1/APCS/PPARGC1A/ZHX3/NECTIN3/ELAC1/TM4SF4/MCCC1/PHGDH/TRIM26/PUS3/ZC3H7B/FGFR4/NNT/MRPL2/CRYZ/CLASP1/SLC25A44/SDHD/DEPDC5/CRK/PGBD5/SLC25A23/PBX3/FRMD4A/KLHL20/SPTBN5/CTPS1/ZNF224/HNF1B/TOPORS/PEX19/C6orf62/PMM1/HOOK1/ALCAM/RNF130/MRM3/LBR/CERS2/PDZK1/IL17RB/NUP153/CDC42EP1/MIEF1/WDR12/GEM…
MOOTHA_TCA	16	0.624853	1.79312	0.00601069	0.0158334	0.00749845	9983	tags=62%, list=20%, signal=50%	SDHA/SDHD/SDHB/FH/OGDH/SUCLA2/ACO2/MDH2/SUCLG1/IDH3A
PID_TRAIL_PATHWAY	28	0.541594	1.79187	0.00562936	0.0149637	0.00708655	7931	tags=43%, list=16%, signal=36%	TNFRSF10D/PIK3R1/RIPK1/IKBKG/SMPD1/TNFRSF10B/CFLAR/PIK3CD/PIK3CA/TNFSF10/MAPK8/CASP10
GREENBAUM_E2A_TARGETS_DN	18	0.604295	1.79027	0.00559159	0.0148886	0.00705101	10381	tags=61%, list=21%, signal=49%	ALPL/MYO7A/DESI1/CYFIP2/BLK/GAB1/GIMAP4/EID1/SERINC3/PQLC3/GM2A
BRIDEAU_IMPRINTED_GENES	62	0.456001	1.79007	0.00135349	0.00449657	0.0021295	3096	tags=27%, list=6%, signal=26%	IGF2/SLC38A4/PON3/GATM/SLC22A3/TNFRSF10D/APOC2/DDC/TH/CD81/HTR2A/INS/PEG3/FRAT1/GRB10/IGF2R/SLC22A18
MORI_IMMATURE_B_LYMPHOCYTE_UP	48	0.479974	1.78963	0.00136333	0.00451644	0.00213891	11217	tags=52%, list=22%, signal=41%	DTX1/SMAP2/GUCD1/CTSS/IL10RA/PML/TMEM50B/LYN/ERO1B/DUSP6/SAMHD1/BIRC3/BTG1/RGS14/MCL1/PIP4K2A/PTPRC/PTPN6/CD72/ADCY7/PXK/GMIP/HCK/GNS/SLC25A53
MENSE_HYPOXIA_UP	97	0.420178	1.78946	0.000232775	0.00110632	0.000523932	10118	tags=46%, list=20%, signal=37%	ANG/GADD45A/PLIN2/GBE1/ANGPTL4/RORA/PPP1R3C/KIAA2013/INSIG1/RNASE4/RIOK3/ALDOC/ERICH1/STARD4/FAM13A/BNIP3/INSIG2/PRPSAP1/NAMPT/ELL2/EGLN1/KLF7/CEBPB/KLHL24/TIPARP/KDM4C/NFIL3/SCD/SOD2/FAM110C/CEBPD/TSLP/PLOD2/CLK3/KDM4B/ABCB6/P4HA1/DIDO1/CDK19/STK4/MXI1/VEGFA/PEX13/C4orf3/RBPJ
BIOCARTA_PYK2_PATHWAY	27	0.546331	1.7892	0.00519892	0.0140024	0.00663129	9394	tags=52%, list=19%, signal=42%	MAP2K1/PRKCA/PTK2B/MAPK14/RAF1/GNAQ/MAP2K3/SOS1/CALM1/BCAR1/MAPK8/PRKCB/MAP2K2/MAPK1
GAJATE_RESPONSE_TO_TRABECTEDIN_UP	65	0.452064	1.78828	0.000682283	0.00251082	0.00118908	7567	tags=31%, list=15%, signal=26%	CBS/CLU/PCK2/PROS1/FGG/PHYH/C1R/GADD45A/C4BPA/GOLGA8A/NNT/GPNMB/MYH10/SEPT6/OASL/NID2/TXNIP/CLIC4/KLRC3/UGCG
REACTOME_ABC_TRANSPORTER_DISORDERS	77	0.436731	1.78779	0.000459137	0.00178292	0.000844363	3002	tags=17%, list=6%, signal=16%	ABCC2/ABCB11/ABCG5/ABCG8/ERLIN1/ABCB4/ABCA1/ABCC6/ABCD4/APOA1/SEL1L/OS9/RNF185
MARSON_FOXP3_TARGETS_STIMULATED_DN	10	0.715919	1.78758	0.00733659	0.0186442	0.00882957	6008	tags=50%, list=12%, signal=44%	TEC/PLIN2/FOXO3/CPEB2/RAMP1
FORTSCHEGGER_PHF8_TARGETS_UP	276	0.361876	1.78753	0.000250941	0.00110632	0.000523932	6489	tags=27%, list=13%, signal=24%	MLXIPL/STEAP3/FZD5/PCK2/GPT2/PDK4/GCLC/ECM2/UGT2B10/KLF9/SORBS2/RIDA/MAN1A1/DHRS3/INHBE/TFPI/PRG4/PTP4A1/INSR/CENPV/AKR1C1/MIR99AHG/HLX/HERPUD1/FAM171A1/CDC37L1/SESN2/PHGDH/A2M/CCNYL1/DDAH1/GRB10/EIF2AK4/ID1/PCSK1/TCP10L/PDGFC/ECE1/SEC62/MBTD1/EIF5/KDM7A/SLC16A1/TPCN1/DCBLD1/TGFBR2/CERK/TBC1D4/RBM33/WWP1/DUSP16/C6orf62/SMC5/STOX2/BMP2/ACVR2B/MESD/HMOX1/NQO2/TRMT10A/RBKS/TMTC4/BNIP2/SCD/NR2F1/EFNA…
ROZANOV_MMP14_TARGETS_SUBSET	32	0.522999	1.7873	0.00402955	0.0113903	0.00539425	7320	tags=41%, list=15%, signal=35%	COL18A1/HHIP/GJB2/NR3C1/CALD1/COL6A1/FN1/ANGPTL2/SULF2/LAMB1/COL6A2/PLOD2/P3H1
GAUSSMANN_MLL_AF4_FUSION_TARGETS_C_UP	163	0.386516	1.78729	0.00023872	0.00110632	0.000523932	8133	tags=31%, list=16%, signal=26%	ACAA1/FAM20A/SH3BGRL2/KLF12/SLC9A3R2/FNDC3A/FOXN3/AC129492.1/TEC/PTPRD/ITGA1/CPT1A/FAM149A/IFNAR1/SDC1/RORA/FAT4/COX11/LRCH1/RREB1/DDAH1/PDLIM5/PPP1R16A/RAB3IL1/COL27A1/SLC12A6/STAT3/GLIS3/LPIN1/DNAJC3/FLT4/PLD3/MFSD8/SOX7/UNC13B/KANK3/TPK1/BNIP2/GPR45/IFITM3/YIPF4/PRPF4B/INO80/SRSF11/PIK3CA/NKTR/UGDH/CTSF/NEMF/TUBG2/STAG1
SANSOM_APC_MYC_TARGETS	236	0.367683	1.78643	0.000247586	0.00110632	0.000523932	8240	tags=31%, list=16%, signal=26%	IGF2/FZD5/SHMT1/FMR1/ARHGEF12/FAM83G/MTHFD1/ZBTB48/POFUT1/SIGMAR1/SDC1/TXNRD2/MVK/SHMT2/DNMBP/DCUN1D3/OGFR/CTBS/PHGDH/IKBKG/LHPP/BIVM/OPLAH/SCRN2/VIPR1/ZNF444/HIRA/CXXC1/NFIC/RASSF4/NDST1/EPB41/USP20/NOL8/WIPI2/HNF1B/PMM1/CDC42BPA/SFXN2/MCCC2/TUBB2A/ATMIN/SH3D19/ATL2/DHCR24/ATF6/ZKSCAN8/VPS51/RBKS/MRPL38/OGFOD1/CREBBP/LDAH/TXLNA/WDR33/TM9SF3/FADS3/KAT2A/EIF4G1/TXN2/NUB1/TFIP11/PXN/CFAP410/MINDY1/…
RAMALHO_STEMNESS_DN	71	0.443399	1.78568	0.000454339	0.00178292	0.000844363	7865	tags=39%, list=16%, signal=33%	HSD11B1/ST3GAL6/CCL23/ZDHHC14/BMP1/BIN1/SIRPA/RELN/CTSS/CTSB/AP2A2/NRP1/CYFIP2/CSF1R/MPEG1/HSD17B8/CEBPD/PAPSS2/LILRA5/GRINA/ABLIM1/PPP2R5A/RFLNB/ADSSL1/RGS14/KCNAB2/ITGB2/PTPRC
REACTOME_RAB_REGULATION_OF_TRAFFICKING	121	0.403214	1.78488	0.000234742	0.00110632	0.000523932	12150	tags=45%, list=24%, signal=35%	RIN3/DENND5B/TBC1D2/RAB14/AKT2/DENND4A/TRAPPC8/DENND2C/RAB33B/ALS2/RAB11B/MON1B/OPTN/ST5/RAB3IL1/DENND1C/TBC1D13/TRAPPC6B/DENND1A/ALS2CL/TBC1D17/RAB27A/TRAPPC11/DENND4C/ULK1/MADD/TSC1/CHM/TRAPPC12/HPS1/AKT1/SBF1/TBC1D25/DENND4B/RAB8A/RAB12/TBC1D14/TBC1D10C/RGP1/RAB5A/MON1A/TRAPPC10/MAP1LC3B/RIC1/GAPVD1/AC034102.1/RAB21/GGA3/RAB3GAP1/RAB35/TBC1D10A/RABGAP1/RAB39A/GGA2/TBC1D15
BIOCARTA_HDAC_PATHWAY	25	0.554464	1.78396	0.00539568	0.0144657	0.00685073	7787	tags=48%, list=15%, signal=41%	IGF1/INSR/MAPK14/PIK3R1/HDAC5/PPP3CC/NFATC2/CAMK1/CALM1/AKT1/PIK3CA/MAP2K6
BURTON_ADIPOGENESIS_2	66	0.450044	1.78319	0.000685558	0.00251515	0.00119113	8211	tags=36%, list=16%, signal=30%	TLE1/XDH/IL1R1/ITGA5/SDC1/SIDT2/AVPI1/FKBP5/RHOU/FST/GSTO1/ST3GAL1/PRR5/RAMP3/GNPTAB/SAR1B/PRKCE/PRDX6/SAMHD1/RBM14/NSUN2/UGDH/MCL1/SPSB1
REACTOME_GLYCOSAMINOGLYCAN_METABOLISM	124	0.401131	1.78283	0.000235294	0.00110632	0.000523932	8572	tags=37%, list=17%, signal=31%	SDC2/HS3ST3B1/HYAL1/CHST13/ST3GAL2/HS3ST3A1/ST3GAL6/SDC1/LYVE1/GPC6/CHST7/STAB2/SLC26A1/NDST3/CHP1/HS3ST2/B3GAT1/ST3GAL1/ARSB/NAGLU/HS2ST1/GALNS/NDST1/SDC4/EXT1/CEMIP/CHST9/DSE/CHSY3/BGN/SLC35D2/PAPSS2/CHPF/GPC5/SLC35B3/GUSB/EXT2/CHST12/ST3GAL3/DCN/OMD/HSPG2/HEXA/CHST2/B4GALT1/SDC3
REACTOME_MUCOPOLYSACCHARIDOSES	11	0.694418	1.78134	0.00788288	0.0198599	0.00940533	11116	tags=64%, list=22%, signal=50%	HYAL1/ARSB/NAGLU/GALNS/GUSB/HGSNAT/GNS
REACTOME_SIGNALING_BY_RECEPTOR_TYROSINE_KINASES	468	0.340945	1.77975	0.000261575	0.00110632	0.000523932	7878	tags=29%, list=16%, signal=24%	IGF2/MST1/APOE/PCSK6/HGFAC/EGFR/MUC20/KLB/FURIN/PPP2R1B/HPN/FES/VAV2/PRKCA/TEC/ELMO1/IGF1/SHC2/ESRP2/MET/INSR/PTPN3/DIAPH1/WASF3/PTK2B/PDE3B/ITCH/AKT2/FYN/RANBP10/SPRY2/KDR/IRS1/RBFOX2/MAPK14/PLG/INS/RPS6KA3/ADORA2A/PRKACA/PIK3R1/STAT5B/EPN1/SH2B3/RAPGEF1/COL4A4/BAIAP2/IRS2/FGFR4/PTPRK/STAT6/GRB10/PDGFC/NRG1/ROCK2/CDH5/ATP6V0A1/COL6A6/PRR5/ITPR2/PIK3R4/HGF/MEF2A/CRK/CXCL12/FGFR3/NCOR1/COL27A1/ARH…
PID_ERBB1_DOWNSTREAM_PATHWAY	105	0.411533	1.77915	0.000232126	0.00110632	0.000523932	9448	tags=40%, list=19%, signal=33%	MAP2K1/EGFR/VAV2/PRKCA/PEBP1/F2RL2/PLD1/RPS6KA3/PIK3R1/DUSP1/BAIAP2/RAF1/CHN2/MAP3K2/STAT3/CYFIP2/EPS8/MAPKAP1/MTOR/KSR1/SOS1/PIK3CD/SMAD1/DUSP6/GAB1/USP6NL/RICTOR/AKT1/PIK3CA/WASL/ZFP36/MAPK8/MEF2C/STAT1/MAP2K5/PPP2R2A/MAP2K2/RAB5A/ATF2/MAPK1/PDPK1/ELK1
DURAND_STROMA_S_UP	293	0.357443	1.77898	0.000250313	0.00110632	0.000523932	4925	tags=24%, list=10%, signal=21%	MOGAT2/FAM20A/MAF/SLC43A1/GPER1/SERPINF1/NADK2/CLDN1/PDK4/DEPDC7/ADGRL2/CYP2C8/BACH2/GAS2/ALPL/NDRG2/SPON2/IVD/IGF1/SOX5/TNFRSF10D/CTSO/IL1R1/MMP15/ELFN1/GNAO1/BMPER/ANGPTL4/ST6GAL1/SELENOP/ONECUT2/LONRF3/NPR2/ANGEL1/SLC27A3/AKAP2/TSPAN6/FAT4/NRBP2/S1PR1/IL13RA1/ELL2/TMEM47/MRGPRF/PRRG1/THSD7A/ST3GAL1/SLC39A8/SORCS2/GRIA3/IL4R/CABLES1/RAB3IL1/EHD3/CXCL12/NYNRIN/LGMN/ARHGEF28/AGO4/EDA/AKAP6/NCKAP5…
REACTOME_REGULATION_OF_SIGNALING_BY_CBL	22	0.569907	1.77811	0.00538721	0.0144513	0.00684389	7333	tags=41%, list=15%, signal=35%	FYN/PIK3R1/RAPGEF1/BLNK/CRK/PIK3CD/LYN/PIK3CA/SYK
BIOCARTA_GLEEVEC_PATHWAY	23	0.563198	1.77745	0.00607014	0.015947	0.00755223	8694	tags=52%, list=17%, signal=43%	MAP2K1/PIK3R1/STAT5B/RAF1/SOS1/STAT5A/AKT1/PIK3CA/MAPK8/JAK2/BCR/STAT1
RIGGI_EWING_SARCOMA_PROGENITOR_UP	430	0.342745	1.77619	0.000259943	0.00110632	0.000523932	6176	tags=25%, list=12%, signal=22%	ABCA5/GPR17/TDO2/GCH1/STEAP3/ALDH5A1/ACACB/C5/PGLYRP2/PALM2/ZBTB16/AQP3/CLDN1/CES1/SORD/DAPK1/G0S2/ENPEP/IL1RAP/RARRES2/ABHD6/CD14/IGF1/NR3C2/GDF7/ZC3H13/NFATC3/UGT3A1/TMEM37/ENPP1/FCGRT/ST6GAL1/SH3TC1/KDSR/PLA1A/GPR37/SAMD5/GFRA2/GYG2/HSD17B2/RAPH1/FZD4/PLCG2/CHCHD10/MAFB/MAPRE2/FAT4/DAB1/PIK3R1/ANKS1A/PEG3/CDC37L1/SULT1A2/SH2B3/PVR/RELN/A2M/GPX3/IL13RA1/ALDH7A1/L3MBTL3/TRIM35/COL4A4/NT5DC1/GLG1…
KEGG_VEGF_SIGNALING_PATHWAY	76	0.435051	1.77584	0.000459348	0.00178292	0.000844363	7009	tags=34%, list=14%, signal=29%	MAP2K1/PLA2G2A/PRKCA/SHC2/PLA2G12B/NFATC3/AKT2/KDR/MAPK14/PLCG2/SPHK2/PIK3R1/CHP1/PPP3CC/RAF1/NFATC2/NFAT5/PLA2G1B/PPP3R1/NOS3/JMJD7-PLA2G4B/PIK3CD/PIK3R5/AKT1/PXN/PIK3CA
RIZ_ERYTHROID_DIFFERENTIATION_12HR	36	0.506478	1.77557	0.00386979	0.0109985	0.00520869	6677	tags=42%, list=13%, signal=36%	KLF9/NR1H3/GATA6/SATB1/BACH1/HDAC5/AR/ZNF22/PBX3/HIC1/NOTCH1/TEAD1/SMAD1/HAND2/ESR1
DELACROIX_RAR_BOUND_ES	449	0.341414	1.77488	0.000261643	0.00110632	0.000523932	9254	tags=33%, list=18%, signal=27%	SLC35D1/GCH1/STEAP3/SLC39A14/AMT/HLF/TMPRSS6/HS3ST3B1/AQP3/MASP2/HYAL1/EVA1A/CEBPA/G0S2/ARG1/MTSS1/SLC28A1/CFL2/GIPC2/DHRS3/ALPL/AGPAT3/AMACR/FUBP3/SERPINF2/VWA8/ITGA5/MTHFD1/SEPSECS/LRRC2/LSR/CTSZ/SDHA/AKAP1/RNF125/MME/GSPT2/SPRY2/GFOD1/PTH1R/SLC15A1/HSD17B14/DNAJC22/SMAP2/SIGIRR/DENND2C/C22orf15/NACC2/MACO1/LRRC61/LACTB2/FXN/CALR/UCK1/ZFYVE28/DUSP1/COBL/PGPEP1/FRAT1/RREB1/BCKDHA/HADH/MBP/GRTP1/…
MOLENAAR_TARGETS_OF_CCND1_AND_CDK4_UP	68	0.445193	1.77452	0.000915961	0.00319092	0.00151116	7649	tags=34%, list=15%, signal=29%	PBLD/SCG5/NT5E/PAH/SLC9B2/THNSL1/STOM/LNP1/SATB1/STARD4/KLHDC1/MAML3/MBLAC2/LINC00667/RUFY3/TM7SF2/KLHL24/TMEM204/ENPP2/C7/ZNF783/UTRN/RBMS3
REACTOME_CASPASE_ACTIVATION_VIA_EXTRINSIC_APOPTOTIC_SIGNALLING_PATHWAY	26	0.546094	1.77442	0.00630347	0.0164395	0.00778549	4557	tags=35%, list=9%, signal=31%	DAPK1/CD14/RIPK1/TNFRSF10B/FAS/CFLAR/TICAM2/TLR4/TICAM1
WANG_LMO4_TARGETS_UP	356	0.34869	1.77431	0.000255167	0.00110632	0.000523932	7399	tags=29%, list=15%, signal=25%	PLGLB1/CROCCP2/ABTB2/ATF5/CEBPA/MT1X/CFL2/MBNL3/GLUD1/FAM20C/ARHGEF12/ATP13A3/IL1R1/PGRMC1/ITPRID2/MT2A/BOK/MEGF9/HNMT/ACY1/AKR7A3/CECR2/AK3/HIPK2/ITFG1/SPTBN1/ZBED1/EPM2AIP1/PCYOX1/SFXN1/RHOU/CALR/ETS2/SLC2A4RG/NEK6/NT5DC1/NNT/CNNM3/ARRDC4/CTDSP1/SERINC5/CRLS1/HSP90B1/TCAF1/FIGN/SOWAHC/CFLAR/FBXO8/CROT/GRN/FOXRED1/ZNF326/MINDY3/MAP3K3/TLK1/NIT1/ACVR1B/RBMXL1/RALGPS2/PPP3R1/NBPF14/ANKRD55/PDZK1/U…
AGUIRRE_PANCREATIC_CANCER_COPY_NUMBER_DN	235	0.365162	1.77263	0.000247219	0.00110632	0.000523932	10239	tags=39%, list=20%, signal=31%	PQLC1/TST/APOL6/SEC14L2/ALPL/MPST/HMGCL/PDSS2/RBFOX2/APOL2/XPC/CDC40/SUN2/SEC63/PIGV/TMBIM6/MBP/TSPYL1/NRG1/FUCA1/CARD10/ZPR1/GCAT/IRF2/PHC2/GPATCH3/RSRP1/DEPDC5/SMARCA2/PSD3/C6orf120/WASF1/TOM1/PIK3C3/MAP3K5/ACVR1B/ADNP2/SCAF11/CTDP1/CCDC28A/MIEF1/APOL3/NCR1/ATP6V1B2/LMBR1L/SRSF4/GATB/C12orf29/GALE/DUSP6/HAND2/QRSL1/ISOC1/RANBP6/SARAF/TXN2/PPP2CB/BTG1/MFNG/TFIP11/MTAP/HECA/TAB1/ATP5F1A/DCTD/CLIC…
MOOTHA_GLYCOLYSIS	21	0.574553	1.77262	0.00541883	0.0145029	0.00686832	3512	tags=38%, list=7%, signal=35%	PFKFB1/PGM1/FBP1/CD4/ALDOB/ALDOC/ENO3/FBP2
MULLIGHAN_MLL_SIGNATURE_2_DN	277	0.358708	1.77261	0.000250941	0.00110632	0.000523932	8804	tags=33%, list=17%, signal=28%	SLC17A9/ASS1/CXCL2/SLC9A3R2/DAPK1/MAN1A1/DHRS3/PDIA5/ELMO1/TFPI/WDR59/SORL1/HPGD/CYP4F2/CSAD/STOM/CYP2E1/ADK/MAPRE2/PEX3/FAM171A1/STAT5B/DEPTOR/FAH/ABCB1/HS2ST1/GSDMB/HGF/STAT4/RIPOR1/GNPTAB/MYRF/TGFBR2/WASF1/IFI44/MRC1/PRF1/SCN2A/MRPS2/CLMN/KLRK1/HSD17B12/JAK1/LYRM1/TSPAN7/LGR5/N4BP2L2/TEX10/PML/TRIM24/P2RX3/CETP/EIF2AK2/KATNB1/EPS15/SIPA1L1/SUPV3L1/MROH7/SLC12A4/CCNG1/NIT2/PITPNB/RASL10A/ABHD10…
TSUDA_ALVEOLAR_SOFT_PART_SARCOMA	10	0.709574	1.77173	0.00800356	0.0201315	0.00953392	5480	tags=50%, list=11%, signal=45%	PCK2/MET/PRKAG2/PIM1/LYN
MILI_PSEUDOPODIA_CHEMOTAXIS_UP	80	0.429454	1.77116	0.000459137	0.00178292	0.000844363	8412	tags=32%, list=17%, signal=27%	ATF5/SAMD4A/SH3PXD2A/KIF1C/AKAP12/SCAPER/PHLDB2/INPP1/XAF1/CYB5R3/SYCP3/ZEB1/GOLGA4/NBEAL1/IGIP/CCNG1/DCAF5/DYNLL2/ANKRD11/ZEB2/GXYLT1/MAP2K7/RFLNB/TRAK2/CENPB/EIF3A
SHEDDEN_LUNG_CANCER_GOOD_SURVIVAL_A12	315	0.353364	1.77099	0.000252717	0.00110632	0.000523932	8437	tags=30%, list=17%, signal=26%	PROZ/GCKR/SLC43A1/ATF5/AMN/MAGOH2P/GPER1/NR1I2/C1RL/ABCC3/ITIH3/LIME1/SLC6A13/ADGRG6/CFB/PLA2G2A/OGDHL/AOX1/SEC14L4/ZC3H13/BBOX1/DIPK1A/APOA2/DENND5B/TRAM2/IFNAR2/ST6GAL1/ERP44/IGHM/HPD/CYP2E1/STXBP6/SEL1L/SPATS2L/MGAT2/ADORA2A/HERPUD1/DNAJB9/SLC1A1/TUT1/SH3BP2/TRIM26/SLC38A7/KCNJ4/TAPBPL/PAOX/TXNDC5/TCP10L/CRADD/SAA1/WBP4/MRPS31/ATP6V0A1/AC026470.1/ZER1/SCAND2P/SEC24A/DIP2C/MAVS/SKAP1/TPP1/IGKV1…
MIKKELSEN_MCV6_LCP_WITH_H3K4ME3	156	0.385351	1.77082	0.000238095	0.00110632	0.000523932	9081	tags=34%, list=18%, signal=28%	CES2/ADAMTS13/C1RL/ASPDH/SYNE3/SLC9A3R2/LBP/TMEM176B/PIPOX/CYP2C8/FGD4/TMEM176A/XDH/RAB17/ALDH1A1/ZBTB20/RORC/KIF1C/TNS2/EVI5/PCOLCE/ROBO4/RNF123/XAF1/AKNA/TAPBPL/MRGPRF/ARAP1/IL17RC/COL6A1/CD244/GSTM1/OAS2/SLC25A45/AOC1/ANGPTL2/GPANK1/TREX1/PLEKHA6/SH3KBP1/TNFSF10/PSTPIP1/HEXIM2/IFI35/SNX10/RSAD2/TBC1D10C/SERPINB8/TNKS1BP1/UNC13D/SERPINB9/RBM10/THEM5
FINETTI_BREAST_CANCER_KINOME_GREEN	16	0.616867	1.7702	0.00734639	0.018659	0.00883657	14744	tags=69%, list=29%, signal=49%	MLKL/FGR/LYN/SYK/PRKCB/PRKCQ/ZAP70/HCK/BTK/JAK3/LCK
SHAFFER_IRF4_TARGETS_IN_MYELOMA_VS_MATURE_B_LYMPHOCYTE	100	0.413486	1.77008	0.0002331	0.00110632	0.000523932	10717	tags=45%, list=21%, signal=35%	SLC37A4/F12/MAN2A1/SLC31A1/DNAJB9/HDAC5/NAMPT/BCKDHA/C11orf24/TXNDC5/PDIA4/LDLRAP1/HSP90B1/SEC62/CCNC/CFLAR/CYP51A1/CD38/ELL/PNP/GAA/NFIL3/PDS5A/BMP6/AHCY/SLC38A2/TRAM1/FHL1/ATP5F1D/UBE2H/ZFP36/ITGA4/P4HA1/ADGRE5/GNG7/MXI1/FKBP11/UBE2J1/TNFAIP3/GRSF1/TIMP2/CASP3/TM9SF4/PPP2R5C/CCPG1
REACTOME_CONSTITUTIVE_SIGNALING_BY_AKT1_E17K_IN_CANCER	26	0.544594	1.76954	0.00630347	0.0164395	0.00778549	10136	tags=54%, list=20%, signal=43%	FOXO1/AKT2/PRR5/MAPKAP1/FOXO3/MTOR/RICTOR/AKT1/CDKN1B/RPS6KB2/AKT1S1/CASP9/PDPK1/FOXO4
KEGG_FC_EPSILON_RI_SIGNALING_PATHWAY	79	0.430376	1.76894	0.000460299	0.00178514	0.000845411	9416	tags=44%, list=19%, signal=36%	MAP2K1/VAV2/PLA2G2A/PRKCA/PLA2G12B/AKT2/FYN/MAPK14/PLCG2/PIK3R1/IL3/RAF1/CSF2/MAP2K3/PLA2G1B/JMJD7-PLA2G4B/SOS1/PRKCE/PIK3CD/LYN/LCP2/PIK3R5/AKT1/PIK3CA/MAP2K7/SYK/SOS2/INPP5D/MAPK8/MAP2K6/PRKCB/MAP2K2/FCER1A/MAPK1/PDPK1
REACTOME_CTLA4_INHIBITORY_SIGNALING	21	0.573278	1.76869	0.00541883	0.0145029	0.00686832	10466	tags=52%, list=21%, signal=42%	PPP2R1B/AKT2/FYN/LYN/PTPN11/PPP2CB/AKT1/PPP2R5A/PPP2R5D/PPP2R5E/PPP2R5C
BENNETT_SYSTEMIC_LUPUS_ERYTHEMATOSUS	29	0.529173	1.76838	0.00713171	0.0182225	0.00862985	9944	tags=62%, list=20%, signal=50%	SERPING1/XAF1/IRF7/IFIT3/MX1/OASL/PLSCR1/OAS2/LY6E/IFITM3/TDRD7/IFI44L/TNFSF10/DEFA1/IFI35/STAT1/DEFA3/MX2
LENAOUR_DENDRITIC_CELL_MATURATION_UP	115	0.402348	1.76778	0.000233699	0.00110632	0.000523932	6592	tags=27%, list=13%, signal=23%	CBS/APOE/ACAA2/CAT/CEBPA/SCARB1/GATM/NR1H3/HSD11B1/MAOA/APOC1/MGLL/DNASE1L3/ST6GAL1/PEBP1/TGM2/ECM1/DPP4/A2M/DUSP1/ACOT2/PPARG/CYB5A/MRC1/LIPA/ENPP2/GAS6/C1QB/SPTAN1/BIRC3/CR1
STAMBOLSKY_TARGETS_OF_MUTATED_TP53_DN	51	0.469295	1.76707	0.00275292	0.00829243	0.00392716	9174	tags=53%, list=18%, signal=43%	LBP/HERC6/XAF1/SP100/RIPOR3/SLC40A1/IFIT1/IRF7/TLDC2/MX1/SOCS2/MICAL3/DTX3L/DDX58/IRF9/SP110/DDX60/TRAPPC12/TBC1D22A/FAM214A/RTEL1/IFI35/SAMD9/OAS3/STAT1/CUL9/HLA-B
WANG_ADIPOGENIC_GENES_REPRESSED_BY_SIRT1	27	0.539549	1.76699	0.00610307	0.0160048	0.00757958	3248	tags=37%, list=6%, signal=35%	EHHADH/KLF15/KLB/IGFBP4/PDXP/RBP4/FGF21/CHCHD10/GK/CBR1
PID_PDGFRA_PATHWAY	22	0.566253	1.76671	0.00606061	0.015947	0.00755222	7358	tags=36%, list=15%, signal=31%	SHF/PIK3R1/RAPGEF1/CRK/JAK1/SOS1/PIK3CA/PDGFRA
REACTOME_FCERI_MEDIATED_MAPK_ACTIVATION	86	0.422666	1.76656	0.000462214	0.00178812	0.000846823	12446	tags=50%, list=25%, signal=38%	VAV2/PLCG2/IGHV4-39/IGLV1-47/SOS1/LYN/IGLV3-1/LCP2/IGKV3-20/IGHV2-70/PAK2/IGKV2-28/IGLC2/IGHV3-7/MAP2K7/SYK/IGHV3-23/MAPK8/IGHV4-59/IGKV1-39/IGLV2-23/IGHV3-48/IGKV2-30/IGKV1-5/FCER1A/MAPK1/IGKV2D-30/IGLV1-40/IGLV1-51/IGKV1-12/IGLV2-11/IGKV4-1/IGHV3-33/IGLV2-14/IGKV1-16/IGLC3/IGLV3-19/IGHV2-5/IGKV1D-39/IGKV1-17/IGHV4-34/PLCG1/IGKV3-11
REACTOME_REGULATION_OF_RUNX1_EXPRESSION_AND_ACTIVITY	17	0.605908	1.7664	0.00737101	0.0187113	0.00886137	8253	tags=59%, list=16%, signal=49%	AGO4/CDK6/TNRC6A/TNRC6B/PML/PTPN11/MOV10/AGO1/CBFB/AGO3
DORSAM_HOXA9_TARGETS_DN	32	0.516763	1.76599	0.00470114	0.0128841	0.00610169	11312	tags=56%, list=22%, signal=44%	IGF2/ARNTL/FCGRT/MAN2A2/SDC4/LYN/CISH/SRSF11/DCT/DYNC1LI2/SERPINB9/SBNO1/CD36/WSB1/CLCN7/RBBP6/GLRX/VHL
REACTOME_TETRAHYDROBIOPTERIN_BH4_SYNTHESIS_RECYCLING_SALVAGE_AND_REGULATION	10	0.707213	1.76584	0.00822588	0.0205801	0.00974638	8688	tags=80%, list=17%, signal=66%	GCH1/GCHFR/NOS3/CALM1/AKT1/SPR/DHFR/PTS
SCHAEFFER_PROSTATE_DEVELOPMENT_6HR_DN	453	0.339413	1.76559	0.000261438	0.00110632	0.000523932	10402	tags=34%, list=21%, signal=27%	AKR7L/MYO1B/CAT/LRP1/GOLIM4/ENPEP/MIA2/FOXN3/FURIN/TJP2/DHRS3/PHETA1/ALDH1A1/PTPRD/SLC38A10/PDZD8/ARID4A/ZC3H13/POFUT1/CAMK2N1/MGAT1/SAMD5/PTGR1/RBFOX2/PHLDB2/SPTBN1/FAT4/NAA30/MACO1/CDC37L1/CALR/ORAI3/CEMIP2/CHPT1/CALD1/L3MBTL3/BCKDHA/UBR2/ID1/MYCL/PDIA4/SKI/HSP90B1/ARHGAP10/BRD4/CXXC1/GNAI2/ST5/SMARCA2/NCOR1/LDB2/GRN/GOLGA4/NOL8/TLK1/ID2/PIKFYVE/BSDC1/ADNP2/MPRIP/TNRC6A/PSAP/L3HYPDH/STRN3/ZHX1/…
REACTOME_ACETYLCHOLINE_REGULATES_INSULIN_SECRETION	10	0.706935	1.76514	0.0084482	0.0210575	0.00997248	7590	tags=60%, list=15%, signal=51%	PRKCA/GNAQ/PLCB2/GNA11/GNA14/MARCKS
JI_RESPONSE_TO_FSH_UP	67	0.443103	1.76494	0.000911577	0.00319092	0.00151116	9130	tags=36%, list=18%, signal=29%	CLU/ACADS/C1R/CFHR1/AKR1C3/FCGRT/XPC/SPOP/EBP/CBR1/NAB1/NT5C2/CYP51A1/IL10RB/TM7SF2/SEPT6/BTN3A1/BRD3/MEIS1/IFI35/AXL/ERG28/FADS1/MVD
REACTOME_TIE2_SIGNALING	18	0.59562	1.76457	0.00648624	0.0168325	0.00797157	8043	tags=44%, list=16%, signal=37%	GRB14/PIK3R1/TEK/SOS1/PTPN11/DOK2/PIK3CA/ANGPT2
LUND_SILENCED_BY_METHYLATION	15	0.628567	1.76454	0.00897263	0.022129	0.0104799	5347	tags=47%, list=11%, signal=42%	CLU/SDC1/SDC4/HMOX1/PLPP1/NOTCH1/TMEM101
HOEGERKORP_CD44_TARGETS_DIRECT_UP	26	0.542826	1.7638	0.00675371	0.0174471	0.00826265	5644	tags=42%, list=11%, signal=38%	CFI/SOX5/SERPINC1/MAPK14/PLG/ALB/PYGL/CAMK2D/SH3BP2/ADRB2/MFSD9
XU_CREBBP_TARGETS_DN	41	0.488573	1.76302	0.00319781	0.00946203	0.00448106	11870	tags=44%, list=24%, signal=34%	HSD11B1/DIAPH1/RAB14/OCEL1/CYTH1/CHTF8/ZNF444/ANKRD17/IGHV1-18/ETS1/ERCC2/ADGRE5/CASP9/NR1H2/MS4A4A/ID3/IGHV3-43/TBC1D10A
REACTOME_VEGFR2_MEDIATED_VASCULAR_PERMEABILITY	27	0.538073	1.76215	0.00610307	0.0160048	0.00757958	6889	tags=44%, list=14%, signal=38%	VAV2/AKT2/CDH5/PRR5/NOS3/MAPKAP1/MTOR/CALM1/PAK2/CTNND1/RICTOR/AKT1
BIOCARTA_TCR_PATHWAY	44	0.481522	1.76115	0.00228624	0.00704534	0.00333655	10121	tags=36%, list=20%, signal=29%	MAP2K1/PRKCA/NFATC3/FYN/PIK3R1/PPP3CC/RAF1/NFATC2/SOS1/CALM1/RELA/PIK3CA/MAPK8/PRKCB/ELK1/ZAP70
MCBRYAN_PUBERTAL_TGFB1_TARGETS_DN	62	0.448583	1.76095	0.00135349	0.00449657	0.0021295	6711	tags=39%, list=13%, signal=34%	PDK4/ABCC3/GCLC/DAPK1/LRP5/NID1/ALDH1A1/APOC2/IDH1/MT2A/PPP1R3C/CDH5/IFIT3/SFTPD/SLPI/ID2/PHLDA1/ERBB3/MBTPS1/SOD2/NID2/PTGIS/JCHAIN/BCL6
COATES_MACROPHAGE_M1_VS_M2_UP	82	0.424807	1.7603	0.000693001	0.00252898	0.00119768	3089	tags=18%, list=6%, signal=17%	MAF/GDA/SLCO2B1/ALAD/GATM/DST/CAPN5/CADM1/ABCA9/MARCO/PIK3AP1/BCKDHB/FGD2/OCEL1/ARSB
ONGUSAHA_BRCA1_TARGETS_UP	12	0.667578	1.76026	0.00944882	0.0232178	0.0109956	5925	tags=58%, list=12%, signal=51%	COL18A1/APOE/GADD45A/RBP4/ECM1/HMOX1/ENPP2
PID_ERBB1_RECEPTOR_PROXIMAL_PATHWAY	35	0.504608	1.76026	0.00474791	0.0129895	0.00615159	9394	tags=46%, list=19%, signal=37%	EGFR/PIK3R1/GNAI1/STAT3/SOS1/TLN1/PIK3CD/PTPN1/PTPN11/GAB1/PIK3CA/WASL/PTPN6/STAT1/NCK1/MAPK1
REACTOME_TRANSCRIPTIONAL_REGULATION_OF_WHITE_ADIPOCYTE_DIFFERENTIATION	83	0.424002	1.75988	0.000462107	0.00178812	0.000846823	8875	tags=33%, list=18%, signal=27%	PLIN1/RXRA/PPARA/CEBPA/ANGPTL4/PCK1/MED13/HELZ2/PPARGC1A/PPARG/CCNC/NCOR1/ZNF638/MED16/CHD9/MED23/CEBPB/CREBBP/CEBPD/NCOA2/RELA/THRAP3/EP300/NR2F2/TBL1X/CARM1/CDK19
GRAESSMANN_APOPTOSIS_BY_SERUM_DEPRIVATION_DN	227	0.363867	1.75951	0.000246731	0.00110632	0.000523932	4939	tags=26%, list=10%, signal=24%	KHK/PQLC1/ASS1/GPD1/ZBTB16/GCLC/HYAL1/GPR146/EPB41L4B/DGAT2/ABHD6/KLF9/CAPN5/THRSP/PRKCA/PDIA5/MASP1/ABCD4/ABHD18/GBE1/MT2A/CRY2/GALK1/TGM2/PPP1R3C/CNDP2/SLC5A9/PCOLCE/LGALS4/ELAC1/BNIP3/MAN2B2/PVR/OMP/DUSP1/DEPTOR/LHPP/MYORG/ENO3/PKP2/CDH5/NAAA/BIN3/AS3MT/SPATA13/ABCA2/IL15RA/EGLN1/LPIN1/TNFRSF1B/ATXN7/CSDC2/ID2/VCAM1/CROCC/NOS3/ARMC5/PLEKHA2/HMOX1
CREIGHTON_ENDOCRINE_THERAPY_RESISTANCE_5	488	0.335901	1.75863	0.000266312	0.00111007	0.000525709	6808	tags=27%, list=14%, signal=23%	ACSL1/MYO1B/FZD5/COBLL1/AQP3/ALAD/PALM3/SLC41A2/EPB41L4B/KLF9/MARC2/CFL2/TJP2/LPIN2/FAM20C/SAMD4A/IL1R1/CCDC68/FBP1/AOX1/MFAP3L/FLVCR2/TRAM2/SC5D/GATA6/ACADSB/ENPP1/MGLL/SDC1/ZBTB20/STOM/TMEM245/IQSEC1/FZD4/PHLDB2/PDE8A/INPP1/SMAP2/GUCD1/EPAS1/MALT1/SEL1L/APLP2/RIOK3/RIPOR3/QKI/LSS/NACC2/ZNF275/MACO1/RHOU/C1orf115/GRAMD2B/PI4K2B/RFTN1/SGMS2/TMEM131L/IL13RA1/ELL2/CCNYL1/SAT1/PGPEP1/OCLN/TACC1/GRB1…
LIAN_LIPA_TARGETS_6M	77	0.429589	1.75856	0.000459137	0.00178292	0.000844363	10068	tags=43%, list=20%, signal=34%	DST/MYRIP/MARCO/MAFB/FKBP5/CD5L/CFP/SPIC/SLC40A1/SAA1/SLC6A2/PLA2G7/CTSB/C1QC/LILRB3/FCGR2B/HMOX1/GPNMB/MPEG1/CD244/IL1R2/C1QB/SLC15A3/LILRA5/ACP5/UTRN/C1QA/TNFAIP2/PAPPA/IGSF6/KLRB1/CCR1/MS4A6A
DER_IFN_ALPHA_RESPONSE_UP	74	0.433159	1.75789	0.000687758	0.00251515	0.00119113	8694	tags=39%, list=17%, signal=32%	C1S/SMAD4/TRIM14/TRIM26/HLA-E/IFIT1/FAS/IRF2/IFIT3/MX1/IFI44/PML/LIPA/IRF9/OASL/PLSCR1/OAS2/EPS15/SP110/TRIM22/GBP1/BTG1/HLA-A/PLOD2/NMI/IFI35/IFI16/CD164/STAT1
CHYLA_CBFA2T3_TARGETS_DN	234	0.362234	1.75779	0.000247097	0.00110632	0.000523932	6246	tags=29%, list=12%, signal=26%	LCAT/NAGS/CES2/SLC46A3/RNF128/ADGRL2/TFR2/GLS2/SLC30A10/PC/BDH1/SORBS1/HPN/ATP7B/SEC14L2/AGPAT3/AGTR1/FN3K/ALDH1A1/DHTKD1/CENPV/MEGF9/MGLL/HOMER2/TMEM56/EVI5/ZG16/PAQR9/TNS1/PXMP2/SEPT4/AIFM2/SESN2/TSPAN33/ELL2/SH2D4A/MARCH8/IGF2R/TSPO2/SLC39A8/AQP11/PPM1L/TRIM2/PCCB/MFHAS1/IRF7/TRIM10/RAB3IL1/HEBP1/LPIN1/TINAGL1/SEMA6A/SLC22A23/CARMIL3/ACOT6/GAREM1/ENPP3/PLPP1/OASL/DMTN/MFSD9/SLC12A4/GNA14/CREB3…
PETRETTO_HEART_MASS_QTL_CIS_DN	25	0.546287	1.75765	0.00651978	0.0169081	0.00800739	9180	tags=48%, list=18%, signal=39%	IRAK2/ARHGAP24/DCPS/CEMIP2/ENDOG/REXO4/ZEB2/NDUFAF1/TXN2/SIK1/ISCA1/HYOU1
KYNG_DNA_DAMAGE_BY_4NQO_OR_UV	58	0.454293	1.75646	0.00181942	0.00578581	0.00274006	5036	tags=34%, list=10%, signal=31%	LRP1/TLE1/IGF1/PCYT2/IL1R1/POFUT1/IL18R1/HNMT/INPP1/SLC31A2/PTPRK/TCF7L2/IRF2/ITGAL/BAP1/NMT1/MYD88/AKAP6/SUOX/PRKAB1
VARELA_ZMPSTE24_TARGETS_UP	42	0.484508	1.75612	0.00363471	0.0104445	0.00494634	5987	tags=26%, list=12%, signal=23%	ZBTB16/LEPR/CUX2/CD14/GADD45A/BAIAP2/TNFRSF1B/CYP26A1/GADD45B/PI4K2A/TXNIP
BIOCARTA_IL2RB_PATHWAY	37	0.497721	1.75535	0.00432408	0.0120554	0.00570923	9394	tags=46%, list=19%, signal=37%	IRS1/PIK3R1/STAT5B/FAS/RAF1/CFLAR/JAK1/SOS1/IL2RB/STAT5A/AKT1/PIK3CA/SYK/NMI/PTPN6/RPS6KB1/MAPK1
SIG_PIP3_SIGNALING_IN_CARDIAC_MYOCTES	67	0.440684	1.75531	0.000911577	0.00319092	0.00151116	7642	tags=39%, list=15%, signal=33%	GADD45A/IGF1/MET/AKT2/F2RL2/IRS1/RPS6KA3/PTEN/IGFBP1/PARD3/IRS2/EBP/FOXO3/MTOR/SOS1/PIK3CD/TSC1/PTPN1/GAB1/PIK3R5/PAK2/AKT1/PIK3CA/CDKN1B/SOS2/RPS6KA2
KEGG_CHEMOKINE_SIGNALING_PATHWAY	187	0.371894	1.75472	0.000243013	0.00110632	0.000523932	9849	tags=36%, list=20%, signal=29%	CCL16/MAP2K1/CXCL2/VAV2/ELMO1/SHC2/CCL23/PTK2B/AKT2/STAT2/CCL15/PRKACA/PIK3R1/STAT5B/ADCY1/CCL14/CX3CL1/PARD3/IKBKG/ROCK2/CCL18/GRK5/RAF1/GNAI2/GNAI1/CRK/CXCL12/STAT3/PLCB2/CSK/FGR/FOXO3/GRK2/ADCY9/SOS1/PIK3CD/ARRB2/LYN/CXCR6/RELA/PIK3R5/CCL24/CCR9/WAS/GNB5/AKT1/PXN/XCR1/PIK3CA/RASGRP2/GNG2/TIAM1/WASL/SOS2/BCAR1/CXCR5/NFKBIB/JAK2/ADCY7/ROCK1/STAT1/PRKCB/MAPK1/GNG7/DOCK2/ARRB1/CCR1/CCL28
BILBAN_B_CLL_LPL_DN	42	0.483989	1.75424	0.00386188	0.0109893	0.00520436	7982	tags=43%, list=16%, signal=36%	CAPN3/SORL1/ZBTB20/FYN/SULT1A2/DUSP1/SAT1/GOLGA8N/PNISR/ID2/ARGLU1/KLRK1/DUSP22/PRNP/CCNL1/BIN2/MARCKS/FGL2
STEARMAN_LUNG_CANCER_EARLY_VS_LATE_DN	59	0.452281	1.75403	0.00181077	0.00576223	0.00272889	7333	tags=37%, list=15%, signal=32%	LRP5/F7/LRG1/APOC1/MYO7A/CTSZ/CCL15/SMAP2/SAT1/PDIA4/CTSS/PLD3/ITGAX/SEMA6A/MPEG1/AGAP3/PLET1/ACP5/PTGDR2/RASGRP2/SND1/SYK
GREGORY_SYNTHETIC_LETHAL_WITH_IMATINIB	145	0.385188	1.754	0.000237812	0.00110632	0.000523932	7311	tags=32%, list=15%, signal=28%	ACSL1/ATF5/CLPX/CA5A/SORBS1/CYP2B6/TLE1/CCL23/ITCH/FCN3/SEL1L/GGCX/SP100/SMARCA1/MGAT2/ALDOC/SAT1/DDAH1/PDLIM5/CEACAM1/IRF7/CTSB/PYROXD1/GLT8D1/API5/UGT1A7/SCAF11/CUX1/AZGP1/MORC3/MBD4/TRIM24/SEPT6/SP110/TJP1/KCNJ13/CALM1/CELF2/RTP4/GBP4/TAS2R14/GPC5/NUDT3/CAMK2B/CPSF1/CD93/PLOD2
WATANABE_RECTAL_CANCER_RADIOTHERAPY_RESPONSIVE_UP	113	0.399587	1.7537	0.000232019	0.00110632	0.000523932	8961	tags=36%, list=18%, signal=30%	CFB/MPST/AKR1C1/FCGRT/PCK1/PPID/KDR/ZBED1/COASY/ABCD3/RBL2/GPX2/HADH/LAMP1/GNAI2/RSRP1/IMPA2/GOLGA4/CTSA/TERF2IP/ACVR1B/CNOT1/TNRC6B/AARS/LYRM1/TRIM44/BTN3A1/CUL4B/GAS6/DUSP3/WASHC2C/PPP2R5A/SUMO4/SURF1/MRPL12/CBLB/UBE4B/PDXDC1/CDH1/MGRN1/NUDC
WANG_LMO4_TARGETS_DN	357	0.344391	1.75204	0.000255951	0.00110632	0.000523932	10016	tags=35%, list=20%, signal=28%	BACE1/COBLL1/SLC7A2/F12/GADD45A/ATP11C/RDX/LIN7A/PDZD8/INSR/FDX1/CGN/NUP88/RAB14/ELP2/ITCH/KIAA2013/SMAP2/SPTBN1/TMEM192/CDC37L1/RNFT1/NRDE2/HACL1/S1PR1/CYP2U1/OCLN/OPTN/UBR4/PTPRK/TTC17/GGACT/MYH14/AC044839.1/MBD1/NBR1/MRPS31/PLEKHA1/IFIH1/MKLN1/ZNF407/DUSP16/TOPORS/RDH11/PSAP/SMIM14/KALRN/FAM126B/NFKBIZ/GANAB/USP47/DTX3L/SNX4/TRMT10A/TMEM64/ZFAND2A/CLPTM1/IRF9/EHMT1/ARFGEF2/CPEB2/IFITM3/USP28/D…
PASINI_SUZ12_TARGETS_UP	106	0.404398	1.75163	0.000232396	0.00110632	0.000523932	6002	tags=29%, list=12%, signal=26%	ASS1/PCK2/AQP3/ACAA2/SORD/ALDH6A1/HDAC6/TFPI/SLC25A20/LRRC2/RNF125/HSD17B14/WNK3/CHCHD10/EPAS1/SATB2/CALCOCO2/HTRA1/COBL/IPMK/KLHL13/NPL/IMPA2/CDC5L/DNMT3L/ULK1/TMEM64/GJB3/ZC3HAV1/MREG/USP9X
KYNG_DNA_DAMAGE_DN	181	0.37339	1.75138	0.000244858	0.00110632	0.000523932	6266	tags=27%, list=12%, signal=23%	PRKAB2/PCK2/CXCL2/MT1X/MT1H/GALNT2/GADD45A/TLE1/IGF1/IGFBP3/NNMT/FMO4/IL11RA/AKAP12/TXNRD2/INPP1/PRKACA/EFNB1/CRHBP/TAF1C/RAB11B/SLC31A2/FGFR4/ID1/TCF7L2/SAA1/TNFRSF10B/IRF2/HGF/CCNC/CYP51A1/ITGAL/GOLGA4/NMT1/MYD88/IL10RB/CCNL2/SUOX/CEBPB/FN1/PRKAB1/ALDH9A1/SOD1/MINK1/CREBBP/ESD/TFPI2/ANKRD11
REACTOME_TRAF6_MEDIATED_INDUCTION_OF_TAK1_COMPLEX_WITHIN_TLR4_COMPLEX	16	0.610182	1.75102	0.00845948	0.0210744	0.00998049	12191	tags=75%, list=24%, signal=57%	CD14/IRAK2/TICAM2/TLR4/TICAM1/MAP3K7/TAB1/TAB2/TAB3/TRAF6/SARM1/UBB
VALK_AML_CLUSTER_15	31	0.516305	1.75059	0.00584007	0.0154274	0.00730616	9138	tags=42%, list=18%, signal=34%	ECHDC2/KLF9/SH3TC1/IGHM/SUCLG2/SLC16A1/NDFIP1/EPB41L2/IGF2BP2/MEIS1/TBL1X/FADS1/TNS3
NIKOLSKY_BREAST_CANCER_7Q21_Q22_AMPLICON	75	0.429846	1.75031	0.00091617	0.00319092	0.00151116	10862	tags=44%, list=22%, signal=35%	CYP3A5/CYP3A43/PON3/PDK4/CYP3A4/PON1/SLC25A13/CYP3A7/LMTK2/ZKSCAN1/SDHAF3/CYP51A1/CDK6/PON2/AZGP1/TFPI2/GTPBP10/AKAP9/BRI3/ASB4/ZNF655/KRIT1/SAMD9/SMURF1/GATAD1/CLDN12/PEX1/CDK14/MTERF1/TRRAP/ZSCAN25/SAMD9L/TRIM4
IVANOVA_HEMATOPOIESIS_LATE_PROGENITOR	494	0.333715	1.75001	0.000265957	0.00110958	0.000525477	7524	tags=28%, list=15%, signal=24%	SNTB1/CES2/ATRN/GDA/MAP2K1/ALAD/PLIN5/F10/ABCB4/PPP2R1B/CPNE8/HSD11B1/CPOX/PLIN2/SORL1/ALDH1A1/MET/HP/IDH1/ITGA1/CGN/CCL23/GBE1/MT2A/ABCA9/ALDH3A2/CLINT1/TTR/ALAS1/LMAN1/PTGR1/MSMO1/KCTD14/SLC45A3/CLDN15/WDR7/MINPP1/CDC37L1/CEMIP2/KLHDC2/KIF1B/TSPAN33/HADHB/INSIG2/SGMS2/IL13RA1/SAT1/SLC31A2/TACC1/CPTP/NDUFV1/IPMK/SAA1/HECTD3/NCOA4/LRRC20/AGPS/GPN2/CTSS/FAM107B/PPP4R3B/CTSB/CCNC/SLC33A1/FBXO33/SLP…
AMIT_EGF_RESPONSE_480_HELA	164	0.377884	1.7498	0.000238834	0.00110632	0.000523932	8721	tags=35%, list=17%, signal=29%	ABHD2/EGFR/MT1X/MT1H/PLPP3/SORBS3/MT1F/IGFBP4/ITGA5/MT2A/DIAPH1/TBC1D2/TGM2/RRBP1/BIN1/INPP1/FST/PVR/PPIF/SLC19A1/PDLIM5/MBP/LAMP1/MBD1/PHC2/NUDT4/NCLN/EGLN1/EXT1/MAP2K3/TUBB2A/USF2/DGAT1/BRD2/ARHGEF18/LY6E/POM121/SPOUT1/CAMTA2/PICALM/MYO9B/CDK9/XAB2/TOR4A/RELA/GMDS/AC005840.1/CDV3/MTAP/FAM50B/GAK/MICAL2/HPCAL1/B4GALT1/EFHD2/TMEM8A/EHD1
WANG_CLIM2_TARGETS_UP	255	0.356923	1.74938	0.00024728	0.00110632	0.000523932	6989	tags=29%, list=14%, signal=25%	COL18A1/ECHDC2/CYP2C9/ACACB/CYP1A2/TSHZ2/ABCC3/GLYCTK-AS1/LEPR/MET/ITPRID2/NFATC3/AMY2B/CDK3/SLC17A4/LMAN1/KIAA2013/NPR2/DNAJC22/NUDT16P1/PPP1R26/ZHX3/ATG13/EML3/MERTK/CALR/ADCY1/MTHFD2L/SGPP1/MAGI1/ETNK2/ARMC6/SPG7/NNT/RALGAPA2/CEACAM1/ARAP1/SLC5A3/PLEKHA3/BMS1P1/MAVS/RIPOR1/AOC2/RBM33/SOCS2/ATXN7L1/ALCAM/TAPBP/ZCCHC8/GAREM1/JMJD7-PLA2G4B/ANKS6/GFM2/NAGA/SRSF5/ZBTB7A/ARRB2/RBSN/WDR33/SKIV2L/DUSP…
FUJIWARA_PARK2_HEPATOCYTE_PROLIFERATION_UP	10	0.700543	1.74919	0.0102268	0.0247015	0.0116982	2422	tags=50%, list=5%, signal=48%	SULT1E1/NAT8/APOA4/APCS/FST
AZARE_NEOPLASTIC_TRANSFORMATION_BY_STAT3_UP	125	0.392944	1.74875	0.000234632	0.00110632	0.000523932	9231	tags=35%, list=18%, signal=29%	IGF2/CFH/CLDN1/VNN1/G0S2/SCG5/CUX2/MAN1A1/PID1/CPS1/SORL1/NNMT/AOX1/FOXA2/VSNL1/IL13RA2/FST/GPX3/IL13RA1/CALD1/CHP1/PTPRK/MX1/CYP51A1/TGFBR2/FN1/DDX58/OAS2/PRNP/PTPN11/SNHG14/STX16/CDV3/CLIC4/MCL1/PLTP/HMGCS1/IFI16/B4GALT1/FLI1/LPXN/ARL4C/RAB5A/WIPF1
WIERENGA_STAT5A_TARGETS_DN	190	0.369912	1.74862	0.000243013	0.00110632	0.000523932	7860	tags=30%, list=16%, signal=25%	SERPINF1/C5/SH3BGRL2/PROS1/HGD/CD14/CTIF/ANGPTL6/PDIA5/EPHX2/SH3PXD2A/SPX/WASF3/MGLL/PROSER2/GFOD1/MYLK/BIN1/PLCG2/IL7/ADORA2A/DENND2C/ZFPM1/SMAD6/CLCN4/PPIF/KLHDC1/DEPTOR/IRS2/ROCK2/CLDN5/IRF8/USP20/CAMK1/PLCB2/SLC22A23/ITGB7/TLN1/NOTCH1/EMILIN1/ARHGAP21/ETS1/STX11/TRIM8/SLC9A9/DCLRE1A/GJA4/MEIS1/GP1BA/CD93/NINJ2/PTGIR/CHST12/HEXIM2/ALOX12/NFIB/TMC8
VALK_AML_CLUSTER_5	32	0.511365	1.74755	0.0055966	0.0148896	0.00705147	12133	tags=66%, list=24%, signal=50%	STS/SMPDL3A/HNMT/MAFB/SIGLEC7/RASSF4/CAMK1/PSAP/LILRB3/LILRB1/PILRA/SLC15A3/EFHD2/LILRB2/SIRPB1/CCR1/TFEB/GNS/TYMP/LILRA1/EPB41L3
BYSTRYKH_HEMATOPOIESIS_STEM_CELL_QTL_CIS	127	0.39114	1.7469	0.000234247	0.00110632	0.000523932	9952	tags=33%, list=20%, signal=27%	ALAD/GATM/F5/ACADL/CD1D/TFPI/ARNTL/TTC7B/MYOM1/CCL23/ELOA/SC5D/KIF1C/CREG1/OCEL1/CRYZ/CBR1/NPL/GGH/PON2/USP38/CUX1/ALDH9A1/ATP6V1B2/D2HGDH/VPS52/TRAPPC12/SARAF/NABP1/MTIF2/NUB1/CST3/PDXDC1/MTMR9/FLI1/GATAD2A/AC055839.2/ATAD1/GGNBP2/DPP7/ZMYM6/MPC2
GARGALOVIC_RESPONSE_TO_OXIDIZED_PHOSPHOLIPIDS_BROWN_UP	15	0.622175	1.7466	0.0103185	0.0248718	0.0117789	4388	tags=47%, list=9%, signal=43%	CPNE8/LPIN2/PTGR1/MSMO1/INSIG1/CYP51A1/ADRB2
REACTOME_CHONDROITIN_SULFATE_DERMATAN_SULFATE_METABOLISM	50	0.464844	1.74589	0.0020595	0.00645714	0.00305799	7884	tags=38%, list=16%, signal=32%	SDC2/HYAL1/CHST13/SDC1/GPC6/CHST7/B3GAT1/ARSB/SDC4/CHST9/DSE/CHSY3/BGN/CHPF/GPC5/CHST12/DCN/HSPG2/HEXA
WANG_SMARCE1_TARGETS_UP	289	0.351357	1.74538	0.000251636	0.00110632	0.000523932	7701	tags=30%, list=15%, signal=25%	SDC2/GHR/CFI/TDO2/TSHZ2/CFH/HS3ST3B1/ANG/PROS1/SYNE3/GJB2/C1S/FOXO1/DPYD/ABCA1/ALDH6A1/CGNL1/PRG4/ATP11C/NUCB1/NID1/IGFBP4/IL1R1/CADM1/PLSCR4/STOM/SAMD5/IQGAP2/MAN2A1/MYLK/IRS1/MAN1C1/MAFB/EPAS1/RNASE4/CYLD/MKX/PCYOX1/PPP1R3B/CEMIP2/IL13RA1/CALD1/CCDC71L/GRB10/IPMK/IFIT2/SERINC5/IFIT3/ST5/SLC44A1/LIFR/MCC/SOCS2/FAM102A/PLD3/SLC16A7/SMIM14/RAB27A/AKIRIN2/KLF7/FN1/SNX18/KLHL24/SIPA1L1/BTBD11/ATP10D…
EHRLICH_ICF_SYNDROM_DN	17	0.598558	1.74497	0.00960465	0.0235513	0.0111535	11419	tags=71%, list=23%, signal=55%	SLC1A1/ITGB7/BLK/HMOX1/IGHG1/BTN3A2/MEF2C/IGHA1/TFRC/ID3/TRBC2/INPP4A
SHAFFER_IRF4_MULTIPLE_MYELOMA_PROGRAM	36	0.497718	1.74486	0.00569087	0.0150827	0.0071429	12117	tags=58%, list=24%, signal=44%	SLC37A4/MAN2A1/DENND2C/ELL2/C11orf24/CCNC/CFLAR/CDK6/ITGB7/NFIL3/SCD/CDKN1B/STAG2/P4HA1/TNFAIP3/B4GAT1/CASP3/CANX/IRF4/PAM/SLAMF7
GAZDA_DIAMOND_BLACKFAN_ANEMIA_ERYTHROID_UP	26	0.536994	1.74485	0.00742909	0.0188485	0.00892635	6731	tags=38%, list=13%, signal=33%	LEPR/SEPHS2/SPHK2/TNFRSF10B/FAS/SOS1/ATP6V1B2/TRIM38/DPY19L1/SNRNP70
HOLLMANN_APOPTOSIS_VIA_CD40_DN	263	0.355079	1.74379	0.000250063	0.00110632	0.000523932	8823	tags=33%, list=18%, signal=27%	SERPINF1/SYNE3/PHYH/GATM/MT1X/PGM1/BACH2/TLE1/QPRT/CPOX/KLHL21/VWA8/ACOT13/RRBP1/BDH2/PCTP/SUCLG2/NADK/IFFO1/SPTBN1/ELOVL6/RPH3AL/SATB1/MGAT2/DECR1/MTRF1/SATB2/CREG1/MSRB1/ACOT2/MBP/GSTO1/HLA-E/ST3GAL5/AGPS/ABL1/IFIH1/SKAP1/NAXD/ZNF22/CPVL/DECR2/MYD88/PARP12/MGST2/PON2/TAP2/TRIP6/TRIM44/ZC3HAV1/GSTM1/NIT2/LDAH/TDRD7/ABHD10/NOTCH2/DPY19L1/RTP4/TRAM1/FNDC3B/BRD3/TOR1AIP1/KYAT3/EFR3A/IGLC2/TRIM22/AN…
MASSARWEH_TAMOXIFEN_RESISTANCE_DN	255	0.355713	1.74345	0.00024728	0.00110632	0.000523932	7465	tags=31%, list=15%, signal=27%	PNPLA3/H19/RXRA/GPER1/TST/SCARB1/PLIN5/ATP11A/METTL7B/ABAT/AMFR/IGFBP4/HPGD/PARP4/DLC1/MT2A/CADM1/BMPER/MEGF9/ELP2/SERPINA5/HNMT/ZNF385B/PTGR1/IRS1/FP236241.1/FKBP5/FAXDC2/FYB2/ELOVL2/MYO16/PIK3R1/TMCO6/ETNK2/GCHFR/DEPTOR/SYTL4/LARGE1/DDAH1/NMRK1/PTPRG/PPM1K/CXCL12/LINC00408/WASF1/TOP1MT/RBM33/PIKFYVE/SYBU/C1orf226/NPY1R/SFXN2/FGFRL1/FOXO3/CUX1/PDZK1/IL17RB/ADCY9/KLF10/KCNJ3/PPP1R26-AS1/TEAD1/TIP…
FRASOR_TAMOXIFEN_RESPONSE_UP	51	0.462745	1.74241	0.00321175	0.00948529	0.00449207	5517	tags=33%, list=11%, signal=30%	RDX/PGRMC1/GBE1/SDC1/SUN2/PCYOX1/SERPINA1/LSS/CPM/IL13RA1/PTPRG/SRD5A1/SLC25A1/TM7SF2/KLC1/UPF1/ASCL1
BIOCARTA_GSK3_PATHWAY	20	0.571495	1.74194	0.00968032	0.0236872	0.0112179	7009	tags=40%, list=14%, signal=34%	LBP/PIK3R1/DVL1/MYD88/EIF2AK2/RELA/AKT1/PIK3CA
PID_BMP_PATHWAY	42	0.480477	1.74151	0.00477056	0.0130362	0.00617372	9394	tags=48%, list=19%, signal=39%	HJV/AHSG/SMAD4/FST/SMAD6/CTDSP1/SKI/PPM1A/SMAD7/BMP2/NUP214/MAP3K7/SMAD1/BMP6/TAB1/TAB2/CTDSP2/BMPR2/SMURF1/MAPK1
BROWNE_HCMV_INFECTION_20HR_UP	233	0.359485	1.74134	0.000248324	0.00110632	0.000523932	11083	tags=42%, list=22%, signal=33%	APOE/ATRN/CLUH/PPARA/FOXO1/FURIN/IMPA1/PROX1/ABAT/SOX5/SLC25A20/PTPRD/NFATC3/C4BPB/GPR37/ALAS1/ERP44/PTPRB/INPP1/XAF1/PRKACA/SEPT4/CELF1/SULT1A2/OGFR/ETS2/ZBTB5/TRIM26/AL162171.1/TAF6L/IGF2R/STIMATE/ABCB1/ZPR1/CCNC/CDC5L/BAP1/MLXIP/SNRK/MAP3K3/EDA/ERBB3/FAM49A/BRD2/RAP2C/PML/OAS2/LYN/AC091390.4/C18orf25/MAP3K13/CDC34/CDK2AP2/PTPN11/DUSP3/GAB1/RELA/PGM3/USP6NL/IGFBP2/PRPF4B/UBE2H/SAFB2/IREB2/TIAM1…
LUI_THYROID_CANCER_CLUSTER_1	51	0.462282	1.74067	0.00321175	0.00948529	0.00449207	6795	tags=39%, list=13%, signal=34%	DHRS3/ATP13A3/HHEX/FYN/APLP2/SATB1/GOLGA8A/ITSN2/TNFRSF10B/ST3GAL5/CLASP1/PLD3/ZC3H14/ADCY9/EPOR/CEBPD/DUSP6/GAS6/SLC35E2A/SRSF11
IWANAGA_CARCINOGENESIS_BY_KRAS_DN	116	0.395542	1.73912	0.000233263	0.00110632	0.000523932	10099	tags=41%, list=20%, signal=33%	ETFDH/ABCA6/HDAC6/ITGA1/CYP2E1/TRIM14/RFNG/PTEN/LRP6/IRS2/REXO1/ENO3/MAP3K14/ABCB1/GTF3C5/ZNF23/TERF2IP/HSPA12B/PLEKHM2/PLXNB1/SKAP2/KLF7/DDX3Y/MOGS/PRKCE/ARHGAP5/MYCT1/DLL1/MADD/PITPNB/VPS36/RCBTB2/HTR2B/SAFB2/CTDSP2/ALOX12/RPGRIP1/NR2F2/CADM2/BMPR2/SPCS3/DBP/ZSCAN12/KLRB1/PIK3IP1/SCML4/GTPBP1/NUDCD3
ELLWOOD_MYC_TARGETS_DN	41	0.481829	1.73869	0.00525354	0.0141251	0.00668941	10383	tags=51%, list=21%, signal=41%	ALDH2/C11orf54/PHYH/MARC2/INPP5B/ERP44/TMEM170A/SATB1/ORMDL3/MCFD2/SMIM14/GANAB/NR1D2/PDIA6/RNF149/TMPRSS2/FKBP2/IDE/CDS2/CA2/TMEM97
REACTOME_SIGNALING_BY_HIPPO	20	0.570244	1.73812	0.00990545	0.024087	0.0114072	13155	tags=55%, list=26%, signal=41%	TJP2/AMOTL1/LATS2/TJP1/DVL2/STK4/MOB1B/CASP3/YAP1/AMOTL2/LATS1
HUMMERICH_SKIN_CANCER_PROGRESSION_DN	100	0.406004	1.73805	0.0002331	0.00110632	0.000523932	8162	tags=36%, list=16%, signal=30%	ACSL5/SERPING1/C3/PC/DST/SCP2/IL11RA/ECHS1/HP/ACADSB/BMP1/SMAD4/SPTBN1/PRKACA/ECH1/EFNB1/SERPINA1/HADHB/GPX3/ENO3/CRAT/ID2/CUX1/ECSIT/GPNMB/GAA/TXNIP/GTF2H4/EPHA1/FHL1/COL6A2/PDGFRA/FECH/RECQL5/COQ5/C1QA
SHANK_TAL1_TARGETS_DN	10	0.696059	1.73799	0.0108937	0.0261104	0.0123654	4168	tags=30%, list=8%, signal=28%	RORC/CD4/ID2
BIOCARTA_BCR_PATHWAY	33	0.505199	1.73794	0.00629496	0.0164395	0.00778549	9448	tags=42%, list=19%, signal=34%	MAP2K1/PRKCA/NFATC3/MAPK14/PPP3CC/RAF1/NFATC2/SOS1/LYN/CALM1/SYK/MAPK8/PRKCB/ELK1
PID_IL5_PATHWAY	14	0.630929	1.73781	0.0109915	0.0262808	0.0124461	8192	tags=64%, list=16%, signal=54%	PIK3R1/STAT5B/PIM1/LYN/PTPN11/CISH/STAT5A/PIK3CA/JAK2
SA_B_CELL_RECEPTOR_COMPLEXES	24	0.544755	1.73778	0.00719424	0.0183322	0.00868182	9448	tags=50%, list=19%, signal=41%	MAP2K1/VAV2/RPS6KA3/BLNK/SOS1/LYN/SYK/BCR/PAPPA/ATF2/MAPK1/ELK1
WOOD_EBV_EBNA1_TARGETS_UP	110	0.398233	1.73714	0.000232829	0.00110632	0.000523932	7709	tags=33%, list=15%, signal=28%	CLU/ASS1/C3/SORD/SCARB1/C1S/INHBC/SPON2/AKR1C3/AKR1C1/EPHX1/INPP1/MAPRE2/IGF2R/AGPS/GCLM/HIRA/NAB1/FGFR3/CHERP/ID2/UBE2E3/GSTM4/LGR5/NFE2L2/PRKCSH/SKP2/EIF4G1/SF1/AKR1C2/FHL1/ANXA6/SLCO3A1/SF3B1/UGDH/SRRM1
SARTIPY_BLUNTED_BY_INSULIN_RESISTANCE_UP	17	0.59524	1.7353	0.0102747	0.0248013	0.0117455	7975	tags=35%, list=16%, signal=30%	MT2A/AK4/CD4/RGL1/NFIL3/PKD2
REACTOME_METABOLISM_OF_STEROID_HORMONES	34	0.501171	1.73418	0.0065389	0.0169483	0.00802641	5158	tags=38%, list=10%, signal=34%	HSD17B11/HSD11B1/FDX1/HSD17B2/HSD17B14/CYP17A1/SRD5A2/STARD4/SRD5A1/CYP11A1/HSD17B3/HSD17B12/TSPOAP1
WAMUNYOKOLI_OVARIAN_CANCER_LMP_UP	269	0.351877	1.73381	0.000249813	0.00110632	0.000523932	6713	tags=25%, list=13%, signal=21%	POR/ACAA1/RNF128/SH3BGRL2/ABCC3/ZGPAT/FMO5/DOK4/ABHD6/TIAF1/MPST/HPGD/ESRP2/AKR1C3/BPHL/DHTKD1/ETFB/ACBD5/CENPV/CAMK2N1/MGLL/FNIP2/ACY1/C4orf19/PSD4/ALAS1/RRBP1/IQGAP2/C8orf82/UNC5CL/SURF6/CACFD1/ABCD3/CHPT1/TMEM259/DDAH1/GRTP1/EBP/PLAC8/TMEM129/AKAP13/IMPA2/UBA7/PLS1/LLGL2/TNIP1/EPS8L2/GSTK1/MED16/SLC22A23/ERBB3/GNA11/SLC2A10/SLC35D2/VSIG10/MFSD9/GALE/ARSD/TM9SF3/PREP/EIF4G1/SART1/TTC22/GMDS/LBH…
FONTAINE_FOLLICULAR_THYROID_ADENOMA_UP	75	0.425674	1.73332	0.00091617	0.00319092	0.00151116	8851	tags=41%, list=18%, signal=34%	GALT/ASGR1/GCLC/LRP5/IL11RA/RANBP10/MT1A/BAG6/AMPD2/GLG1/ID1/ZNF512B/NT5C2/UBA7/FLT4/SH3RF2/FGFRL1/MESD/MBNL1/ARHGAP21/DAP/RBM25/EIF4G1/NR6A1/RPS6KA2/PLXNB2/PBXIP1/CDH1/SETD5/ZNF76/ARMCX4
BYSTRYKH_HEMATOPOIESIS_STEM_CELL_AND_BRAIN_QTL_TRANS	157	0.376879	1.73331	0.00023872	0.00110632	0.000523932	9450	tags=34%, list=19%, signal=28%	SERPIND1/GLDC/PCK2/PDK4/PPARA/ABCC3/SLC16A2/EPB41L4B/ABCA1/ORM1/IGFBP4/HP/SDC1/HSD17B2/FLCN/HPD/TNFAIP8L1/PXMP2/NAA30/NRBP2/CSNK2A2/TSPAN33/TTC17/NNT/ZNF444/MKLN1/TPST1/ORMDL3/SKAP2/TCIRG1/TIPARP/DMTN/STK11/MRPS5/AHCY/NXF1/MOV10/RMC1/STX12/RANBP9/CNBP/CTCF/AKAP8/ZBTB14/PDXDC1/PTCD3/VAMP1/EIF5B/CAVIN2/C6orf203/SBNO1/NAALAD2/EYA3/TMEM222
REACTOME_PLATELET_SENSITIZATION_BY_LDL	17	0.594396	1.73284	0.0104981	0.0252786	0.0119715	10466	tags=71%, list=21%, signal=56%	PPP2R1B/APOB/MAPK14/FGR/PTPN11/PPP2CB/PPP2R5A/PTPN6/PPP2R5D/PPP2R5E/PLA2G4A/PPP2R5C
ZHOU_PANCREATIC_EXOCRINE_PROGENITOR	10	0.69325	1.73097	0.0122277	0.0286331	0.0135602	4132	tags=60%, list=8%, signal=55%	HNF4A/PROX1/NR5A2/ONECUT1/FOXA2/HNF1B
QI_PLASMACYTOMA_UP	247	0.354831	1.73092	0.000249688	0.00110632	0.000523932	10962	tags=38%, list=22%, signal=30%	CLU/PCSK6/SLC43A3/NR1H3/RRAS2/IGF1/DNASE1L3/RBP4/MARCO/TGM2/DPP4/CD4/CD5L/ZFPM1/SH3BP2/TMBIM6/CNP/PLCL2/IL4R/PLAC8/ARAP1/DDT/FAS/IRF2/CD40/RASSF4/ABI3/IRF8/RGL1/ID2/TNFRSF14/FGR/ITGB7/CSF1R/BLK/IL17RB/NTN1/CD244/FRMD4B/TLN1/PLSCR1/IL2RB/AOC1/IL1R2/TUBA8/EPOR/PTPN1/BAG2/IL18BP/CISH/TNFSF13B/IL18RAP/BTG1/HCLS1/ITGB3/PSTPIP1/APAF1/MARCKS/ITGB2/IFI35/CD82/SNX10/AXL/PTPN6/RSAD2/FGL2/TRIM5/ADCY7/IFNGR1…
LIU_VAV3_PROSTATE_CARCINOGENESIS_UP	88	0.412132	1.72987	0.000692042	0.00252884	0.00119762	5055	tags=31%, list=10%, signal=28%	CFH/C3/ARG1/ABCB4/C4B/HPR/CD1D/IGF1/AGTR1/NID1/MME/TGM2/IGHM/EDNRB/GPX3/SAT1/MBP/PLA2G7/CTSS/PPARG/IFIT3/SFTPD/SERPINA3/TGFBR2/LILRB3/FN1/GPNMB
WANG_HCP_PROSTATE_CANCER	104	0.401051	1.72978	0.000465333	0.00179721	0.00085113	6378	tags=32%, list=13%, signal=28%	ABCA5/ASS1/ST3GAL6/IGFBP3/GSPT2/CDK10/SHMT2/SIDT2/NR3C1/CEP57/HTRA1/NAMPT/DUSP1/LONP1/PDLIM5/GRB10/CRAT/SLC39A8/MEIS2/CEACAM1/CCDC69/NCOR1/AFF1/CTSA/FOXO3/FN1/BMP2K/AHNAK/GADD45B/TXNIP/REC8/SPTAN1/RETREG2
GAUSSMANN_MLL_AF4_FUSION_TARGETS_A_UP	191	0.365161	1.72897	0.000242307	0.00110632	0.000523932	9231	tags=34%, list=18%, signal=28%	GDA/PCSK6/ACO1/SORD/GJB2/SLC43A3/MAOA/NID1/ST3GAL6/GOT2/GATA6/CRYL1/TGM2/PDE8A/JMJD1C/GK/MAPRE2/NR3C1/ARRDC3/CMBL/CRYAA2/HTRA1/B3GAT1/TRIM2/TCAF1/NIPAL1/GALNS/CXCL12/ZNF22/C9orf64/NRP1/ID2/ADGRL4/TNRC6A/RNF130/C1QL3/ADAL/SLCO1A2/APOL3/TRIM44/ATP6V1B2/LYN/WDR33/RTP4/MAU2/GSDME/ANKRD28/GMDS/CAMK1D/SH3KBP1/CD209/MBTPS2/PITRM1/NR2C2/WASL/ZNF518A/DISP1/YTHDC2/RMDN1/WDR37/TNFAIP2/SETD5/LYSMD2/WLS/WIPF1
REACTOME_FCGAMMA_RECEPTOR_FCGR_DEPENDENT_PHAGOCYTOSIS	142	0.380198	1.72879	0.000472478	0.00181433	0.000859237	11848	tags=44%, list=24%, signal=34%	VAV2/ELMO1/WASF3/FYN/PLD1/PLCG2/PIK3R1/BAIAP2/IGHV4-39/ABL1/ITPR2/IGLV1-47/CRK/WASF1/CYFIP2/PLD3/FGR/IGHG1/PRKCE/LYN/MYO9B/IGLV3-1/IGKV3-20/IGHV2-70/WAS/IGKV2-28/IGLC2/IGHV3-7/PIK3CA/SYK/IGHV3-23/WASL/IGHV4-59/NCKIPSD/IGHG2/IGKV1-39/NCKAP1L/IGLV2-23/IGHV3-48/NCK1/IGKV2-30/WIPF1/IGKV1-5/MAPK1/IGKV2D-30/IGLV1-40/IGLV1-51/IGKV1-12/IGLV2-11/IGKV4-1/IGHV3-33/WASF2/IGLV2-14/IGKV1-16/IGLC3/IGLV3-19/HCK/…
PUIFFE_INVASION_INHIBITED_BY_ASCITES_DN	146	0.37935	1.72871	0.000237304	0.00110632	0.000523932	9058	tags=36%, list=18%, signal=30%	GCH1/NR1H4/ECHDC1/RRAS2/PCYT2/SEPHS2/SELENOP/CDK10/GAMT/NACC2/NDEL1/C1orf115/CALD1/DUSP1/SAT1/PTPRK/NDUFV1/SHLD2/PDGFC/AC026470.1/SLC5A3/SECISBP2L/C6orf120/ZNF330/RGL1/ID2/TM7SF2/NRBF2/RAP2C/IRF9/ANKHD1/CCNL1/EPB41L2/ARFGAP2/FNDC3B/AFG3L2/MTIF2/PNN/RAB11FIP2/LEPROT/TRAK2/UGCG/TEX30/ESF1/STAG1/ERI2/PRPF18/DNAJC24/ATG12/POT1/CDC42EP3/ING3/TRIB1
NGUYEN_NOTCH1_TARGETS_DN	83	0.416348	1.72811	0.000693161	0.00252898	0.00119768	5650	tags=25%, list=11%, signal=23%	ASS1/FNDC3A/PPP2R1B/IL1R1/CADM1/MYO1E/ERCC5/CYP2E1/MGAT2/HERPUD1/ETS2/PPIF/ELL2/UBR4/PBX3/EXT1/BRD2/KLF10/TIPARP/GADD45B/SLC12A4
REACTOME_NEUROTRANSMITTER_CLEARANCE	10	0.692104	1.72811	0.0126723	0.0294387	0.0139417	834	tags=40%, list=2%, signal=39%	ALDH2/SLC22A1/BCHE/MAOA
CHEOK_RESPONSE_TO_MERCAPTOPURINE_AND_LD_MTX_UP	10	0.691986	1.72782	0.0126723	0.0294387	0.0139417	10530	tags=70%, list=21%, signal=55%	MLLT10/RBM19/TM9SF2/YY1/EFR3A/GALNT1/PRKY
RUAN_RESPONSE_TO_TNF_TROGLITAZONE_UP	15	0.615478	1.7278	0.0121131	0.0284217	0.01346	5011	tags=53%, list=10%, signal=48%	ABCA1/ACOX1/HP/PCK1/CP/CIDEC/SERPINA3/TAP2
REACTOME_GLYCOSPHINGOLIPID_METABOLISM	45	0.469888	1.72762	0.00388039	0.0110219	0.00521979	7884	tags=44%, list=16%, signal=38%	NEU4/ENPP7/STS/ARSE/CPTP/SMPD1/ARSB/ARSF/ARSA/CERK/CTSA/PSAP/GBA2/ARSD/ESYT1/ASAH2/UGCG/SUMF2/SMPD3/HEXA
FARMER_BREAST_CANCER_APOCRINE_VS_BASAL	326	0.343313	1.72718	0.000254065	0.00110632	0.000523932	6109	tags=28%, list=12%, signal=25%	ACSL1/GHR/CLU/ECHDC2/ZBTB16/GNMT/HGD/CES1/FMO5/FMR1/KANK1/ECHDC1/ABCC6/HMGCS2/FCN2/RETSAT/MAOA/ACSS3/CYP2J2/AMACR/LONP2/ACOX2/KYNU/AKR1D1/IDH1/ETFB/SC5D/SEPHS2/NUP88/SELENOP/AK4/DUSP10/GSPT2/MSMO1/ACAD8/DCXR/PRKAA1/APLP2/HERC5/QKI/PGRMC2/TRMT11/PIK3R1/CTBS/CX3CL1/ETFA/FAH/ZKSCAN1/OPTN/CRAT/GSTZ1/TCF7L2/PLCL2/SLC22A18/AGPS/NAAA/NT5C2/PNISR/SLC16A1/AR/CYP51A1/CROT/CYB5A/UGT2B11/PEX11A/ENOSF1/ALCAM/…
REACTOME_REGULATION_OF_PYRUVATE_DEHYDROGENASE_PDH_COMPLEX	16	0.601503	1.72612	0.0113535	0.0269913	0.0127826	5315	tags=44%, list=11%, signal=39%	RXRA/PDK4/PDK2/GSTZ1/PDPR/DLD/PDHA1
KYNG_WERNER_SYNDROM_AND_NORMAL_AGING_DN	193	0.364453	1.72601	0.000243962	0.00110632	0.000523932	7061	tags=26%, list=14%, signal=23%	IGF2/NHSL1/SLC16A2/RGN/TJP2/ALDH6A1/POLRMT/AMFR/NUCB1/SLC6A12/AADAC/MYO18A/CYP3A7/USO1/SMARCA1/MGAT2/COASY/FXN/CCL14/STK38/CYTH1/IL13RA1/SDHAP1/GSTO1/IGF2R/DDT/ECE1/ATP6V0A1/CMTR1/SDC4/LGMN/TGFBR2/BAP1/LPIN1/GSTM4/MCFD2/FGR/TNRC6B/DHCR24/MORC3/IRF9/IL2RB/FAM120A/MADD/PHKB/VKORC1L1/CUL2/USP6NL/RND3/CKAP5/HNRNPH1
RICKMAN_METASTASIS_UP	343	0.340538	1.72588	0.000252781	0.00110632	0.000523932	11645	tags=40%, list=23%, signal=31%	MPDZ/ACACB/SH3BGRL2/ANG/HSD17B11/METTL7B/SLC16A10/GABARAPL1/ALDH6A1/APOOL/PGRMC1/SEC14L4/MFAP3L/ABCD4/IDH1/CADM1/DTX4/SEPHS2/ELP2/AKAP1/BDH2/LNP1/PAIP2B/SMARCA1/TSPAN6/EPM2AIP1/ALS2/TAF1C/PLEKHA5/COX11/LRP6/LMTK2/IPO8/TTC17/GPRASP2/PDIA4/NBR1/GCAT/SEC62/TPST1/NDUFAF7/NUDT4/HEBP1/SNED1/GATC/NMT1/NDUFS1/ACVR1B/PILRB/HNRNPUL2/ITGA9/HSD17B12/PPIG/ABCB7/DCUN1D1/FARP2/NEK9/WDR12/FASTKD2/SHE/ACVR2A/SCFD…
GAL_LEUKEMIC_STEM_CELL_UP	128	0.385802	1.72545	0.000468165	0.00180199	0.000853391	10959	tags=43%, list=22%, signal=34%	MAF/AGT/CFHR2/DST/HDAC6/CPT2/BPHL/AGFG2/TMEM140/AKR1C1/BIN1/DBT/CDC37L1/RCAN1/SMAD6/PDLIM5/ZC3H7B/UBR4/SLC1A2/OTUD4/TSPAN9/AC026470.1/PIK3C3/SMIM2/COL6A1/MPHOSPH9/FOXO3/PEX5/ALS2CL/MTUS1/LPP/TOP3B/ETS1/GAN/ABLIM1/WDFY3/CYP2R1/KMT2A/ITFG2/VEGFB/DCAKD/TRIM23/SUCLG1/PEX1/CDK14/PIK3IP1/IRF6/GPATCH1/ANXA9/HCFC1/STAM2/JRKL/ZFP36L1/ARIH2/MAB21L2
BIOCARTA_AMAN_PATHWAY	15	0.614529	1.72513	0.0121131	0.0284217	0.01346	7581	tags=47%, list=15%, signal=40%	MAN1A1/FUT6/MAN1C1/MAN2C1/MAN2A2/MAN1A2/FUT5
PID_ALK1_PATHWAY	25	0.53617	1.7251	0.00719424	0.0183322	0.00868182	5856	tags=44%, list=12%, signal=39%	SMAD4/ENG/ID1/GDF2/TGFBR2/SMAD7/ACVR2B/ACVR1/ARRB2/SMAD1/ACVR2A
ZHENG_FOXP3_TARGETS_UP	26	0.53091	1.72508	0.00810446	0.0203306	0.00962824	12127	tags=50%, list=24%, signal=38%	COBLL1/ABCB1/FAM107B/NRP1/SNX14/FRMD4B/SNX9/IFNGR1/P4HA1/CDC42SE2/IRF6/LRRC8C/CREM
SESTO_RESPONSE_TO_UV_C2	54	0.452284	1.72503	0.00319562	0.00946153	0.00448082	7567	tags=35%, list=15%, signal=30%	GCLC/KANK1/ATP13A3/NR3C1/CXADR/ELL2/ZKSCAN1/RAF1/CTPS1/ERBB3/MORC3/PLSCR1/CCNG1/TJP1/SRSF4/YY1/UBE2H/CTDSP2/UGCG
BIOCARTA_TGFB_PATHWAY	18	0.581952	1.72408	0.0111832	0.026654	0.0126229	8477	tags=56%, list=17%, signal=46%	MAP2K1/SMAD4/TGFBR2/SMAD7/MAP3K7/ZFYVE9/CREBBP/TAB1/EP300/CDH1
BIOCARTA_CBL_PATHWAY	12	0.65385	1.72407	0.0121485	0.0284762	0.0134859	8759	tags=58%, list=17%, signal=48%	EGFR/PRKCA/MET/CSF1R/SH3KBP1/PDGFRA/PRKCB
QI_HYPOXIA	128	0.385472	1.72397	0.000468165	0.00180199	0.000853391	6013	tags=32%, list=12%, signal=28%	GCH1/GPR146/PGM1/SLC41A2/GLS2/CAPN5/NDRG2/IGFBP3/PDXP/GRHPR/GBE1/MT2A/HMGCL/ESPN/RORA/AK4/PPP1R3C/INSIG1/ACSS2/ALDOC/PPP1R3B/LSS/HDAC5/BNIP3/IL13RA1/DUSP1/PKP2/ADIPOR2/PLOD1/CYP51A1/EGLN1/LPIN1/WHAMM/ACAT2/FOXO3/PLEKHA2/HMOX1/PFKL/SCD/EFNA1/ITPK1
KEGG_PHOSPHATIDYLINOSITOL_SIGNALING_SYSTEM	76	0.422335	1.72393	0.000918695	0.00319259	0.00151195	10252	tags=42%, list=20%, signal=34%	PIK3C2G/IMPA1/PRKCA/INPP5B/INPP1/PLCG2/PIK3R1/PTEN/ITPR2/IMPA2/PLCB2/PIK3C3/PIKFYVE/PIK3CD/PLCZ1/INPP5E/CALM1/ITPK1/INPP5K/PIK3R5/PIK3CA/INPP5D/INPP5A/CDIPT/PIP4K2A/DGKQ/PRKCB/ITPKA/CDS2/IPPK/PLCD1/PIK3C2A
PID_HDAC_CLASSI_PATHWAY	66	0.435063	1.72384	0.00182815	0.00580175	0.00274761	9077	tags=38%, list=18%, signal=31%	HDAC6/NR2C1/KAT2B/PRKACA/ZFPM1/HDAC5/TNFRSF1A/PPARG/SIRT1/NCOR1/STAT3/SMAD7/SIRT5/SIRT4/CREBBP/MBD3/HDAC10/RELA/YY1/EP300/WDR77/SIRT2/SIRT3/SMURF1/GATAD2A
BASSO_HAIRY_CELL_LEUKEMIA_UP	77	0.421039	1.72355	0.000918274	0.00319259	0.00151195	5778	tags=29%, list=11%, signal=25%	MAF/DAPK1/MTSS1/DPYD/DST/HPN/IL1R1/IGFBP3/SMPDL3A/DLC1/SPRY2/ENG/TACC1/TCF7L2/TNFRSF1A/TRIM2/CPVL/RNF11/ADCY9/ARRB2/IL1R2/EPB41L2
REACTOME_SYNTHESIS_OF_PROSTAGLANDINS_PG_AND_THROMBOXANES_TX	15	0.613901	1.72337	0.0121131	0.0284217	0.01346	7675	tags=47%, list=15%, signal=40%	CYP8B1/HPGD/AKR1C3/CBR1/PTGR2/PTGIS/TBXAS1
NIKOLSKY_BREAST_CANCER_15Q26_AMPLICON	22	0.552165	1.72275	0.010101	0.0244735	0.0115902	6697	tags=36%, list=13%, signal=32%	PCSK6/LRRC28/ARRDC4/LYSMD4/MEF2A/ADAMTS17/TTC23/ASB7
ROPERO_HDAC2_TARGETS	110	0.394825	1.72227	0.000232829	0.00110632	0.000523932	7581	tags=29%, list=15%, signal=25%	CYP2D6/PPP2R1B/CKMT2/APOA2/TXNRD2/DLEC1/NADK/RBFOX2/APOL2/SEL1L/INS/ADCY10/EPHA2/CEP57/GCFC2/SMAD6/DOP1A/TNXB/ST3GAL1/NCOA4/SLC6A2/SPTBN2/MYRF/CDC42BPA/CHIC2/SEPT6/TXNIP/RABEPK/ADD3/MACF1/BAHCC1/FUT5
IIZUKA_LIVER_CANCER_EARLY_RECURRENCE	11	0.670827	1.72082	0.0123874	0.0289348	0.013703	15416	tags=73%, list=31%, signal=50%	TRIM22/PDGFRA/MEF2C/SGK1/TNFAIP3/CCND2/DDX17/REL
PETRETTO_HEART_MASS_QTL_CIS_UP	33	0.500061	1.72027	0.0067446	0.0174332	0.00825606	8741	tags=39%, list=17%, signal=33%	GPLD1/TST/DGAT2/MAN1A1/BPHL/RAB14/ADRA1B/RPUSD4/TOR1B/VPS52/TRAK2/VAMP1/ABHD16A
CHNG_MULTIPLE_MYELOMA_HYPERPLOID_DN	30	0.510714	1.7202	0.0080196	0.0201608	0.00954782	6105	tags=30%, list=12%, signal=26%	ANG/GABARAPL1/EIF4EBP2/VPS4A/PEX19/MCFD2/PDF/SEC31A/FBXO21
STARK_HYPPOCAMPUS_22Q11_DELETION_DN	21	0.557524	1.72008	0.00948295	0.0232772	0.0110237	5681	tags=38%, list=11%, signal=34%	FOXN3/TXNRD2/ZDHHC8/ENHO/HIRA/CLDN5/SLC25A1/TRMT2A
PID_MTOR_4PATHWAY	69	0.429785	1.72	0.00137112	0.00452942	0.00214506	9416	tags=43%, list=19%, signal=35%	MAP2K1/PRKCA/PLD1/IRS1/PPARGC1A/ATG13/BNIP3/DEPTOR/RRAGD/RAF1/PRR5/MAPKAP1/MTOR/ULK1/PML/EEF2/TSC1/YY1/RICTOR/CLIP1/AKT1/PXN/RPTOR/SGK1/AKT1S1/RRN3/MAP2K2/RPS6KB1/MAPK1/PDPK1
TAKEDA_TARGETS_OF_NUP98_HOXA9_FUSION_10D_DN	148	0.376508	1.71996	0.000475059	0.0018202	0.000862015	4246	tags=22%, list=8%, signal=20%	MAF/APOE/SERPINF1/PDK4/SLCO2B1/CXCL2/SLC16A10/MAOA/PID1/PLPP3/IL1R1/STAB1/CCL23/MAGI2-AS3/SELENOP/RAPH1/DOCK4/A2M/HS3ST2/BLNK/CCL18/FUCA1/PLA2G7/NPL/RASSF4/CTSB/SLPI/LGMN/FRMD4A/NRP1/RGL1/C1QC/TMTC1
REACTOME_NUCLEOTIDE_BINDING_DOMAIN_LEUCINE_RICH_REPEAT_CONTAINING_RECEPTOR_NLR_SIGNALING_PATHWAYS	54	0.450952	1.71995	0.00342388	0.00996714	0.00472027	10431	tags=44%, list=21%, signal=35%	ITCH/IRAK2/MAPK14/CYLD/IKBKG/P2RX7/BIRC2/MAP3K7/TXNIP/RELA/NLRP1/BIRC3/NLRC4/TAB1/TAB2/PSTPIP1/PANX1/MAP2K6/TAB3/MEFV/CASP9/TNFAIP3/CASP4/TRAF6
BIOCARTA_FCER1_PATHWAY	39	0.48273	1.71978	0.00619408	0.0162162	0.0076797	9448	tags=46%, list=19%, signal=38%	MAP2K1/NFATC3/PIK3R1/PPP3CC/RAF1/NFATC2/SOS1/LYN/CALM1/PAK2/PIK3CA/MAP2K7/SYK/MAPK8/PRKCB/FCER1A/MAPK1/ELK1
BHATI_G2M_ARREST_BY_2METHOXYESTRADIOL_DN	127	0.385036	1.71964	0.000468494	0.00180199	0.000853391	5890	tags=24%, list=12%, signal=22%	CBS/PSAT1/C5/GPT2/SLCO2B1/FGB/NEURL2/OGDHL/CTH/MT1F/TPCN2/ARHGAP24/HERPUD1/ELAC1/CSNK2A2/AIG1/SIRPA/SESN2/GCHFR/ZBED3/HLA-E/ABHD14B/MPND/ZNF277/IFRD1/MACROD1/AARS/CAST/CEBPG/ZNF658/EEF2
TANG_SENESCENCE_TP53_TARGETS_UP	33	0.499864	1.71959	0.00696942	0.0178859	0.00847046	6805	tags=39%, list=14%, signal=34%	LCAT/BACE1/ABCA8/ALDH3A2/HSD17B2/RAPGEF4/A2M/NRG1/SLC4A4/USF2/TSPAN12/C7/CLIP1
KEGG_RENAL_CELL_CARCINOMA	69	0.429673	1.71955	0.00137112	0.00452942	0.00214506	7977	tags=41%, list=16%, signal=34%	MAP2K1/MET/AKT2/FLCN/EPAS1/PIK3R1/RAPGEF1/RAF1/HGF/CRK/ARNT/EGLN1/ARAF/SOS1/PIK3CD/CREBBP/ETS1/PTPN11/GAB1/PIK3R5/PAK2/CUL2/FH/AKT1/PIK3CA/SOS2/EP300/VEGFB
SEKI_INFLAMMATORY_RESPONSE_LPS_UP	74	0.423673	1.71939	0.000687758	0.00251515	0.00119113	7282	tags=36%, list=14%, signal=31%	EXOC3L4/GCH1/EGFR/TJP2/IQCJ-SCHIP1/CEMIP2/ABCB1/GSAP/FAS/SELE/CD40/SERPINA3/ZMYND15/TNIP1/BIRC2/VCAM1/BMP2/NFKBIZ/NGFR/GADD45B/RND1/SOD2/SLC15A3/STX11/BIRC3/BTG1/TSLP
ALONSO_METASTASIS_DN	26	0.529079	1.71913	0.00877983	0.0216992	0.0102764	8915	tags=54%, list=18%, signal=44%	FOXO1/CYP7B1/ACKR2/LRRC2/RGPD1/BCL2L10/AKAP13/SECISBP2/GIMAP6/EPS15/IFI44L/TOB2/WNT2/PAPPA
XU_RESPONSE_TO_TRETINOIN_UP	16	0.598919	1.7187	0.0124666	0.0290763	0.0137701	7191	tags=56%, list=14%, signal=48%	PTK2B/ALAS1/PIM1/ITM2B/RCBTB2/WAS/AGO1/ADD3/DEFA1
VECCHI_GASTRIC_CANCER_ADVANCED_VS_EARLY_DN	144	0.377677	1.71869	0.000473709	0.00181757	0.000860769	4777	tags=25%, list=9%, signal=23%	CES2/STEAP3/NAT2/ABCG5/HGD/FMO5/CLRN3/TMEM238L/CLDN23/CPS1/OTC/GOT1/AKR1C3/AADAC/GATA4/CENPV/AKR1C1/REEP6/HSD17B2/ABCG2/CHCHD10/ALDOB/ADH1C/LGALS4/CLDN15/SULT1A2/SSTR1/BLNK/GSDMB/DDT/BTD/SLPI/ABHD13/SYBU/NUDT6/SLC4A4
PID_LYMPH_ANGIOGENESIS_PATHWAY	25	0.534014	1.71816	0.00831835	0.020767	0.00983491	9394	tags=48%, list=19%, signal=39%	ITGA5/ITGA1/MAPK14/PIK3R1/CRK/FLT4/FN1/SOS1/AKT1/PIK3CA/ITGA4/MAPK1
REACTOME_AMINO_ACID_TRANSPORT_ACROSS_THE_PLASMA_MEMBRANE	33	0.499409	1.71802	0.00719424	0.0183322	0.00868182	1523	tags=24%, list=3%, signal=24%	SLC43A1/SLC38A3/SLC38A4/SLC7A2/SLC16A10/SLC6A12/SLC7A9/SLC3A1
HOLLMANN_APOPTOSIS_VIA_CD40_UP	201	0.360496	1.71746	0.000243962	0.00110632	0.000523932	7945	tags=30%, list=16%, signal=25%	ALDH2/SHMT1/ALDH4A1/FOXN3/DST/PRKCA/CYP39A1/PEMT/ACAT1/LSR/RHEBP1/MYO1E/SYNE1/NR3C1/PEX3/ETS2/RFTN1/GCHFR/DEPTOR/TACC1/LAP3/MEIS2/SERINC5/SNX19/PPP3CC/MAP4K4/MFHAS1/BIN3/IRF8/SRP54/DENND1C/CD38/TUBB2A/ITGB7/BLK/CUX1/NQO2/PRPSAP2/DDX3Y/PCM1/SDHB/MYH10/PDLIM2/ATP6V1B2/IGKC/EPB41L2/JCHAIN/PAK2/DPYSL2/CD99/PPP2CB/AGO1/SBF1/MAPK6/SNX10/LRMP/NFIB/PTPRC/MEF2C/PPP6R1
HOLLEMAN_ASPARAGINASE_RESISTANCE_ALL_UP	22	0.550312	1.71697	0.0112233	0.0267225	0.0126553	6125	tags=36%, list=12%, signal=32%	GLDC/CCDC69/GALNS/MICAL3/LRP5L/JMJD7-PLA2G4B/TAP2/DPY19L1
COLDREN_GEFITINIB_RESISTANCE_UP	85	0.411287	1.71671	0.000922509	0.00319945	0.00151521	10064	tags=41%, list=20%, signal=33%	SLC39A14/CDH2/SLC47A1/PPP2R1B/ALDH1B1/POLRMT/GOT1/ALDH1A1/PPIF/PTPRG/ZEB1/NOL8/CTPS1/CDK5RAP2/NFKBIZ/COX15/CEBPG/PDHA1/SUPV3L1/KLHL15/RABEPK/MFSD12/RFLNB/P3H1/LIX1L/RFK/AC022966.1/TBL1X/SRRT/TAMM41/RAD50/IDE/KMT2B/FBXO30/BORCS7
SCHLOSSER_SERUM_RESPONSE_UP	126	0.384786	1.7165	0.000467399	0.00180199	0.000853391	8561	tags=37%, list=17%, signal=30%	KLF12/PTK2B/SCAP/CDK10/PCOLCE/MAP3K11/TRANK1/OCEL1/ELL2/STAT6/ST3GAL1/TYK2/MAP4K4/SCAND2P/DEPDC5/STAT3/UGT1A10/PLEKHM2/CSK/TNRC6B/TAPBP/PITPNM1/BRD2/NR2F6/CBFA2T3/ITGAD/MAP3K7/ZBTB7A/SNX1/MYO9B/SIPA1/PTPN1/GAB1/SPTAN1/RELA/CD99/KIF3B/STX16/HTT/HLA-DRB6/ICAM3/ARHGAP35/IGHA1/KDM4B/PCYT1A/ERCC2
RODWELL_AGING_KIDNEY_UP	498	0.326807	1.71617	0.000265041	0.00110958	0.000525477	9307	tags=33%, list=18%, signal=27%	SLC46A3/SERPING1/CLDN1/C1R/C1S/NT5E/CD14/CFB/CD1D/TBC1D2B/SPON2/TFPI/STS/NNMT/CDO1/P4HB/RIN3/ZCCHC24/ITGA1/STAB1/IFNAR2/IFNAR1/C4A/RNF125/MGAT1/IGHM/IRAK2/SETD7/ANTXR2/AMBP/CCM2/NUS1/EML3/VSNL1/RASSF5/A2M/RFTN1/AKNA/STAT6/FNBP1/SLC40A1/LAMP1/TXNDC5/PDIA4/LDLRAP1/HLA-E/FAS/SCARNA17/ARHGAP10/APBB1IP/HGF/ALPK2/IRF8/GRN/MYRF/COL27A1/FKBP15/PARP14/MRC1/TSPAN18/C1QC/VCAM1/CD38/IL10RA/JAZF1/PARP12/KCND3…
WANG_CLIM2_TARGETS_DN	180	0.366541	1.71582	0.000245761	0.00110632	0.000523932	10594	tags=39%, list=21%, signal=31%	COBLL1/F12/LIN7A/ELOA/STOM/MSMO1/SPTBN1/SP100/RNFT1/CAMK2D/ST3GAL1/TRIM2/IFIT1/FAS/PDPR/SLC25A44/ATE1/MPLKIP/CTSB/CRK/NCOR1/DHRS4-AS1/IFRD1/ITM2B/WHAMM/TOPORS/RDH11/BSDC1/STRN3/CYP20A1/AKIRIN2/KLF7/DUS1L/ELL/IRF9/MBNL1/TNKS2/DUSP3/PGM3/DHX36/ETNK1/CLIP1/RAD23B/SUMO4/SRRM1/ARHGAP12/DCAF1/BCL9L/SAMD9/HMGCS1/NAA35/UBQLN1/RNF149/MPZL2/SLC25A25-AS1/STAT1/SERINC3/ATG12/CASP9/PEX1/ASF1A/PBX2/OCLNP1/RNF1…
KEGG_CIRCADIAN_RHYTHM_MAMMAL	13	0.636309	1.71541	0.0128004	0.0296626	0.0140477	10501	tags=54%, list=21%, signal=43%	AC129492.1/ARNTL/CRY2/PER3/NPAS2/CLOCK/CRY1
PID_THROMBIN_PAR4_PATHWAY	15	0.610754	1.71454	0.0132346	0.0305029	0.0144456	8656	tags=60%, list=17%, signal=50%	F2RL2/F2/ROCK2/GNAQ/PLCB2/GNA11/GNA14/GNG2/ROCK1
KEGG_TIGHT_JUNCTION	132	0.38129	1.71359	0.000709052	0.0025551	0.00121005	3999	tags=22%, list=8%, signal=20%	MPDZ/CLDN1/CLDN14/PPP2R1B/TJP2/RRAS2/CLDN23/PRKCA/CTNNA3/CGN/CLDN2/AKT2/AMOTL1/CLDN15/CSNK2A2/PTEN/MAGI1/CLDN22/PARD3/OCLN/MYH14/AFDN/GNAI2/GNAI1/CLDN20/CLDN16/EPB41/CLDN5/LLGL2
MATSUDA_NATURAL_KILLER_DIFFERENTIATION	467	0.328433	1.71345	0.000262467	0.00110632	0.000523932	8590	tags=32%, list=17%, signal=27%	OAF/CD302/PROZ/RDH16/KLKB1/SH3BGRL2/ZBTB16/SLC16A2/SLC41A2/WWC2/HABP2/DST/MAN1A1/KCNJ8/HSD11B1/ZC3H12C/TLE1/SMO/SLC13A3/DHRS3/SPON2/IGF1/PLIN2/MMAA/IGFBP4/SORL1/ST3GAL6/NAT8/PTPRD/MTHFD1/SLC25A13/CADM1/SLC22A9/GALK1/TF/ACSF3/MYO1E/HOMER2/SLC15A1/EVI5/CHST7/SHMT2/PPARGC1A/ARHGAP24/STAB2/MERTK/ALS2/LATS2/KIF1B/GRAMD2B/PHGDH/PVR/TMEM30A/MAGI1/ENG/SAT1/ARMC6/ITSN1/SLC40A1/EBNA1BP2/PLBD2/ABCB1/CARD10/…
LIANG_HEMATOPOIESIS_STEM_CELL_NUMBER_LARGE_VS_TINY_DN	42	0.472466	1.71247	0.00567924	0.0150706	0.00713717	6444	tags=38%, list=13%, signal=33%	TUT7/LPIN2/POLRMT/ALDH1A1/TMEM56/APLP2/FKBP5/SLC19A1/DESI1/PKP2/CMPK2/BCAT2/LPIN1/MAP3K7/CUL2/SPRYD7
TURASHVILI_BREAST_NORMAL_DUCTAL_VS_LOBULAR_UP	66	0.432114	1.71215	0.00182815	0.00580175	0.00274761	7464	tags=30%, list=15%, signal=26%	PBLD/ACACB/GATM/RIDA/GLUD1/ST3GAL6/MTMR4/KLF11/DNAH1/CX3CL1/ZYG11B/COL27A1/DCAF8/FAM49A/SPATA5L1/FRMD4B/SKP2/USP25/MTAP/CLCN3
SCHAEFFER_PROSTATE_DEVELOPMENT_12HR_UP	107	0.394575	1.71106	0.000232612	0.00110632	0.000523932	6853	tags=32%, list=14%, signal=28%	ERRFI1/MAF/PROS1/AVPR1A/SMOC1/KLF15/KLF9/NT5E/TLE1/PID1/ARHGEF26/MPST/MAOB/SHH/BDH2/UBE4A/FKBP5/MKX/BNIP3/ACOT2/SLC39A8/PDGFC/TRIM2/CEACAM1/WWP1/FILIP1/TMEM242/SETBP1/AHNAK/CEBPD/FNDC3B/BCL6/IGFBP2/STAT5A
LEE_RECENT_THYMIC_EMIGRANT	233	0.353225	1.71102	0.000248324	0.00110632	0.000523932	10513	tags=37%, list=21%, signal=30%	GPR146/N4BP2L1/TENM1/DAPK1/ATP11A/TPRG1/HPGD/CSAD/ACBD5/FNIP2/IGHM/SPRY2/NADK/SIDT2/AUH/PLCXD2/AKAP2/ERICH1/ABHD17B/NINL/RHOU/CEP57/MTHFD2L/N4BP2/PLAC8/PCGF5/MBTD1/GNAI1/FAM126A/MAML3/KLHL8/VARS2/ZNF776/CMPK2/CTPS1/ID2/MFSD8/ZCCHC9/ANKRD55/HERC2P2/QSOX2/SKAP2/NFKBIZ/USP38/MPEG1/PLSCR1/CSTF2T/VPS13C/LPP/TOB1/HEG1/TOX2/PM20D2/RBM7/CCR9/LRPPRC/ARL5A/IGLC2/CMTR2/THRAP3/TNFSF10/HTR2B/DARS/CD93/MARCKS/…
BARRIER_COLON_CANCER_RECURRENCE_DN	18	0.577499	1.71088	0.0118542	0.0279967	0.0132587	9192	tags=56%, list=18%, signal=45%	NUCB1/STAT2/CDK10/CTSA/NDFIP1/TSPAN7/PFKL/FOXJ3/ASB13/SPPL2B
REACTOME_FOXO_MEDIATED_TRANSCRIPTION_OF_CELL_CYCLE_GENES	17	0.586713	1.71044	0.0127317	0.0295182	0.0139793	7034	tags=41%, list=14%, signal=35%	FOXO1/GADD45A/SMAD4/RBL2/FOXO3/BTG1/CDKN1B
GUTIERREZ_CHRONIC_LYMPHOCYTIC_LEUKEMIA_DN	56	0.446123	1.71033	0.00273785	0.00825765	0.00391068	7630	tags=25%, list=15%, signal=21%	RXRA/GCLC/ABCA6/ALDH3A2/PEBP1/SPATS2L/DNMBP/PBX3/DPEP2/MAP3K5/LPP/ATXN1/TTN/CCDC88A
BIOCARTA_IL1R_PATHWAY	30	0.507757	1.71025	0.00846514	0.0210773	0.00998185	7787	tags=47%, list=15%, signal=39%	IL1RAP/IL1R1/IRAK2/MAPK14/MAP3K14/IL1RN/MAP2K3/MYD88/MAP3K7/RELA/IRAK3/TAB1/MAPK8/MAP2K6
REACTOME_GLUTATHIONE_CONJUGATION	35	0.490097	1.70964	0.00813927	0.0203961	0.00965925	6290	tags=49%, list=12%, signal=43%	GCLC/GSTA1/GSTA2/CNDP2/MGST1/GSTO1/OPLAH/GSTZ1/GCLM/GSTT2B/GSTK1/GSTM4/MGST2/AKR1A1/GSTM1/ESD/GGT7
BIOCARTA_PGC1A_PATHWAY	15	0.608961	1.7095	0.0132346	0.0305029	0.0144456	5810	tags=47%, list=12%, signal=41%	PPARA/ESRRA/PPARGC1A/HDAC5/PPP3CC/CAMK1/CALM1
SASSON_RESPONSE_TO_GONADOTROPHINS_UP	86	0.408965	1.70929	0.000924428	0.003203	0.00151688	6236	tags=28%, list=12%, signal=24%	COL18A1/MAP2K1/HSD11B1/ALPL/PTP4A1/PGRMC1/RAB14/PHKA2/MSMO1/GK/FKBP5/ACP2/DUSP1/AL162171.1/TMBIM6/GRK5/CYP11A1/CREBL2/MAP3K5/RAB27A/PLPP1/MAP3K7/TFPI2/DUSP3
WEIGEL_OXIDATIVE_STRESS_BY_HNE_AND_TBH	59	0.440724	1.70922	0.00316885	0.00938823	0.00444611	7820	tags=34%, list=16%, signal=29%	CLU/DST/BMP1/MYLK/ERCC5/CTSL/ETS2/GPX2/IL3/ITSN1/STAT6/TNFRSF1A/RXRB/IL6ST/LYN/SMAD1/ETS1/HTT/SELENBP1/GAK
BILD_CTNNB1_ONCOGENIC_SIGNATURE	77	0.417481	1.70899	0.00114784	0.00387107	0.00183327	12118	tags=52%, list=24%, signal=40%	SORL1/HIPK2/NR3C1/SCML1/TRIM14/QKI/LATS2/PLEKHA1/WASHC4/PNISR/SECISBP2/SCAF11/MAPKAP1/CHD9/FAM120A/NEK1/KHNYN/RBM25/FBXO11/DHX36/ARL5A/ELF1/NEMF/KDM4B/ATRX/TNFAIP3/BOD1L1/SRSF6/LUZP1/PIK3C2A/THOC2/SRSF10/PHACTR2/KATNBL1/FRYL/SMC3/SREK1/URB1/TMCC1/SMG1
DEMAGALHAES_AGING_UP	54	0.448064	1.70893	0.00365213	0.0104881	0.004967	8631	tags=43%, list=17%, signal=35%	CLU/SERPING1/PCSK6/C3/MT1F/GSTA1/C4A/MGST1/ADIPOR2/CTSS/IL33/C1QC/FCGR2B/GPNMB/MPEG1/TXNIP/C1QB/JCHAIN/CLIC4/EFCAB14/C1QA/SGK1/MSN
BIOCARTA_CERAMIDE_PATHWAY	21	0.553853	1.70876	0.0119666	0.0281344	0.013324	7693	tags=38%, list=15%, signal=32%	MAP2K1/RIPK1/AIFM1/SMPD1/TNFRSF1A/RAF1/RELA/MAPK8
KEGG_GLYCOSAMINOGLYCAN_DEGRADATION	21	0.553826	1.70867	0.0119666	0.0281344	0.013324	3484	tags=29%, list=7%, signal=27%	HS3ST3B1/HYAL1/HS3ST3A1/ARSB/NAGLU/GALNS
BIOCARTA_NFKB_PATHWAY	21	0.553732	1.70838	0.0119666	0.0281344	0.013324	7112	tags=48%, list=14%, signal=41%	IL1R1/RIPK1/IKBKG/MAP3K14/TNFRSF1A/TNFRSF1B/MYD88/MAP3K7/RELA/TAB1
WATANABE_ULCERATIVE_COLITIS_WITH_CANCER_DN	15	0.608488	1.70817	0.0136833	0.0313823	0.0148621	9881	tags=60%, list=20%, signal=48%	BTN3A1/LCP2/CXCR6/GBP4/GBP5/GBP1/CNOT6L/NLRC5/SLA
REACTOME_CA2PLUS_PATHWAY	61	0.437462	1.70808	0.00271432	0.00820253	0.00388458	7200	tags=31%, list=14%, signal=27%	FZD5/PRKCA/GNAO1/WNT11/FZD4/TCF7L2/ITPR2/AGO4/PLCB2/TNRC6A/PPP3R1/TNRC6B/MAP3K7/CALM1/MOV10/AGO1/GNB5/GNG2/NLK
CHOI_ATL_CHRONIC_VS_ACUTE_DN	19	0.566772	1.70802	0.0116227	0.0275334	0.0130393	11856	tags=58%, list=24%, signal=44%	SPTBN1/CMTM6/LRRC8D/SERBP1/ATP6V1A/CTDSP2/CGGBP1/HSPD1/MAT2B/MDH1/PPP1CC
LEE_METASTASIS_AND_ALTERNATIVE_SPLICING_UP	74	0.420849	1.70793	0.000687758	0.00251515	0.00119113	5098	tags=27%, list=10%, signal=24%	ADRA1A/GAS2/SMO/MET/BMP1/C6/HIPK2/STAB2/ANKS1A/BNIP3/TSPAN33/SH2D4A/PIM1/TNFRSF1A/TSPAN9/CEACAM1/MAP4K4/CAMK1/RTN4/CCBE1
TOMLINS_PROSTATE_CANCER_DN	40	0.475551	1.70706	0.00710683	0.0181688	0.00860444	7209	tags=42%, list=14%, signal=36%	CLU/GATM/DST/MYLK/AKAP12/CYLD/TACC1/MEIS2/ST5/LPIN1/ZNF516/CALM1/C7/GAS1/FHL1/MEIS1/SPART
KRASNOSELSKAYA_ILF3_TARGETS_UP	40	0.47543	1.70663	0.00710683	0.0181688	0.00860444	8694	tags=42%, list=17%, signal=35%	APOE/CFH/PROS1/NT5E/CTSO/XAF1/HLA-E/IFIT1/IFIT3/MX1/IL6ST/PLSCR1/TRIM22/OMD/IFI35/IFI16/STAT1
MACAEVA_PBMC_RESPONSE_TO_IR	105	0.394754	1.70661	0.000464253	0.00179452	0.000849855	5736	tags=23%, list=11%, signal=20%	METTL7A/PANK1/F5/GLS2/MAMDC4/GADD45A/RETSAT/TNFRSF10D/PTP4A1/TCAIM/XPC/CMBL/TMEM30A/TNFRSF10B/HECTD3/MAP4K4/FAS/EI24/ITPR2/JADE3/PRKAB1/CCNG1/ASCC3/PPP4R3A
PID_TCR_CALCIUM_PATHWAY	28	0.51563	1.70596	0.00833146	0.0207887	0.00984516	4441	tags=29%, list=9%, signal=26%	NFATC3/PRKACA/RCAN1/IL3/CHP1/CSF2/NFATC2/PPP3R1
TONKS_TARGETS_OF_RUNX1_RUNX1T1_FUSION_SUSTAINED_IN_GRANULOCYTE_UP	15	0.60765	1.70582	0.0139076	0.0318656	0.015091	4910	tags=40%, list=10%, signal=36%	TMEM176B/ALDH1A1/CYP1A1/CRHBP/ID1/IL17RB
BROWNE_HCMV_INFECTION_14HR_DN	290	0.343217	1.70508	0.00025208	0.00110632	0.000523932	9690	tags=39%, list=19%, signal=31%	PRKAB2/MYO1B/SLC16A2/ADGRL2/EGFR/G0S2/CA5A/ASL/MT1E/SPAG9/DST/NR1H3/RRAS2/ACOX1/PLPP3/CDC14B/DIAPH2/MT1F/NNMT/MET/ZCCHC24/PARP4/ETFB/RORC/IRS1/HIPK2/MT1A/BCKDHB/SYNE1/ADH1C/UNC93A/SIRPA/TMCO6/SMAD6/FAH/ZKSCAN1/TCF7L2/DESI1/CRADD/GRK5/MRPS31/FAS/MGMT/IRF2/ST5/AKAP13/ABCA2/GLT8D1/EXT1/NIT1/ACAT2/EEA1/BLK/RUFY3/TM7SF2/GLOD4/HIC1/UBL3/PRKCE/BTN3A2/PIK3CD/PIGCP1/NR1D2/DMAC2L/TJP1/NEK1/GALE/SIPA1/CEBPD…
VANDESLUIS_COMMD1_TARGETS_GROUP_4_UP	16	0.594146	1.705	0.0142476	0.0324697	0.0153771	4511	tags=44%, list=9%, signal=40%	APOE/APOM/APOOL/APOA1/TTR/LGMN/AFP
JAATINEN_HEMATOPOIETIC_STEM_CELL_UP	319	0.339895	1.7047	0.000253485	0.00110632	0.000523932	5752	tags=23%, list=11%, signal=20%	SLC25A27/ADGRA3/SLC27A2/HLF/C11orf54/SERPING1/CFH/GATM/DAPK1/GOLIM4/CHST13/SHANK3/DST/ADGRG6/MICU3/PLS3/CNKSR3/TIAF1/SCN9A/TFPI/RDX/ALDH1A1/AKR1C3/SMIM24/CPT1A/HHEX/SELENOP/IQGAP2/GCSH/SMARCA1/CRHBP/ACSF2/PLEKHA5/TRO/DEPTOR/MEG3/ZNF395/DDAH1/HADH/ZBED3/BIVM/SLC39A8/PDGFC/TCAF1/WDR91/ADAT2/C11orf95/ZNF512B/GNAI1/TXNRD3/PREX2/SMARCA2/TMEM38B/MBLAC2/PWWP3A/WASF1/SOCS2/LPIN1/PRXL2A/CDK6/ANKRD6/ITGA9/…
REACTOME_ONCOGENIC_MAPK_SIGNALING	81	0.411784	1.70437	0.000686656	0.00251515	0.00119113	9767	tags=41%, list=19%, signal=33%	MAP2K1/FGG/FGA/FGB/PEBP1/QKI/MAP3K11/CAMK2D/RAF1/APBB1IP/KDM7A/MPRIP/CSK/ARAF/FN1/KSR1/TRIM24/TLN1/ZC3HAV1/ARRB2/BRAP/CALM1/AKAP9/TENT4A/ITGB3/SND1/CAMK2B/CLCN6/JAK2/MAP2K2/MAPK1/MARK3/ARRB1
GAZDA_DIAMOND_BLACKFAN_ANEMIA_ERYTHROID_DN	462	0.326969	1.70433	0.00026137	0.00110632	0.000523932	7962	tags=27%, list=16%, signal=23%	CAPN3/ABCA5/ACACB/GALT/MAGOH2P/CYP1A2/TMPRSS6/SYNE3/FMO5/ST3GAL2/A1CF/DST/KANK1/CIDEB/LPIN2/MAOA/RAPGEF2/DIAPH2/RDX/APOM/LONP2/BPHL/ZCCHC24/CPT1A/ACSM3/FBXL4/DTX4/DAO/PHKA2/ARL4D/NR2C1/ERN1/RRBP1/INSIG1/CAMKK2/DNAJC16/MTHFS/CYP2E1/SLC27A3/SPTBN1/ZHX3/EML3/FAM13A/MFN2/MYO15B/CLEC1B/BNIP3/TMCO6/NNT/DESI1/ZDHHC18/MAGT1/ZNF33B/PHF8/SECISBP2L/CTSB/BTD/CFLAR/CDC5L/AOAH/NCOR1/ARNT/BCAT2/KLHL20/ERAP1/ATP…
NIKOLSKY_BREAST_CANCER_17Q21_Q25_AMPLICON	333	0.337293	1.7043	0.000250063	0.00110632	0.000523932	9039	tags=32%, list=18%, signal=27%	ABCA5/FAM20A/HLF/ABCC3/CHAD/ABCA8/ABCA6/SPAG9/PRKCA/ACOX1/FN3K/SLC38A10/NFE2L1/MTMR4/SLC25A10/ABCA9/HELZ/GALK1/RSAD1/CDK3/ERN1/TRIM25/NOTUM/PCTP/APOH/MED13/AFMID/DCXR/SEPT4/PDK2/ABCA10/RFNG/RNFT1/ACSF2/CALCOCO2/COX11/CYTH1/C1QTNF1/BAIAP2/GPRC5C/TACO1/TOM1L1/SPOP/RAB37/SPATA20/MBTD1/WBP2/SKAP1/ABI3/PNPO/CHMP6/LLGL2/MAP3K3/STRADA/USP32/PITPNC1/YPEL2/AC087651.1/DUS1L/NGFR/TSPOAP1/PSMD12/OGFOD3/CEP95…
REACTOME_PRE_NOTCH_PROCESSING_IN_GOLGI	18	0.575263	1.70426	0.0134198	0.0308689	0.014619	8371	tags=61%, list=17%, signal=51%	FURIN/ST3GAL6/SEL1L/RFNG/NOTCH4/NOTCH1/NOTCH2/MFNG/ATP2A2/ST3GAL3/B4GALT1
REACTOME_INOSITOL_PHOSPHATE_METABOLISM	48	0.457028	1.70407	0.0043172	0.0120544	0.00570874	10100	tags=52%, list=20%, signal=42%	IMPA1/INPP5B/INPP1/PLCG2/MINPP1/PTEN/IP6K3/IPMK/IMPA2/NUDT4/PLCB2/PLCZ1/CALM1/ITPK1/PPIP5K2/NUDT3/INPP5D/INPP5A/MTMR7/MTMR9/NUDT10/ITPKA/IP6K1/IPPK/PLCD1
LIANG_HEMATOPOIESIS_STEM_CELL_NUMBER_SMALL_VS_HUGE_UP	38	0.481072	1.70393	0.00619835	0.0162183	0.00768069	3295	tags=24%, list=7%, signal=22%	SLC35D1/ACADM/PLS3/GAS2/TMEM56/QDPR/ITFG1/APLP2/GCLM
ONDER_CDH1_TARGETS_3_UP	18	0.57513	1.70387	0.0134198	0.0308689	0.014619	3578	tags=39%, list=7%, signal=36%	ZBTB16/LEPR/KLF9/PRKCA/ALDH6A1/RNASE4/FTL
REACTOME_IMMUNOREGULATORY_INTERACTIONS_BETWEEN_A_LYMPHOID_AND_A_NON_LYMPHOID_CELL	185	0.361229	1.70377	0.000241313	0.00110632	0.000523932	11858	tags=43%, list=24%, signal=33%	C3/CD1D/CLEC4G/CD81/SIGLEC1/SIGLEC7/SIGLEC11/CXADR/LILRB5/PVR/SIGLEC9/HLA-E/IGHV4-39/IGLV1-47/CD40/SFTPD/ITGAL/VCAM1/KLRF1/PILRB/LILRB3/KLRK1/ITGB7/FCGR2B/LILRB1/PILRA/NCR1/IGLV3-1/JAML/LILRA6/IGKV3-20/IGHV2-70/CD99/LILRA5/IGKV2-28/IGLC2/IGHV3-7/HLA-A/SIGLEC8/CD300A/IGHV3-23/NECTIN2/ITGB2/ICAM3/IGHV4-59/KLRG1/CD300LF/IGKV1-39/CDH1/ITGA4/LILRB2/IGLV2-23/IGHV3-48/IGKV2-30/HLA-B/IGKV1-5/HLA-F/IGKV2D…
MAGRANGEAS_MULTIPLE_MYELOMA_IGLL_VS_IGLK_UP	41	0.472033	1.70334	0.00753769	0.0190827	0.00903724	5756	tags=37%, list=11%, signal=32%	BPHL/DSG1/NR2C1/HSD17B2/MALT1/SMARCA1/CSNK2A2/FAS/CTSB/CYB5A/EXT1/BMP2/FGR/NFIX/IGKC
TUOMISTO_TUMOR_SUPPRESSION_BY_COL13A1_DN	17	0.584245	1.70325	0.0131785	0.0304034	0.0143985	6195	tags=53%, list=12%, signal=46%	BCO2/BBOX1/APOA2/CYP1A1/TTR/CYP2E1/AFP/PLSCR1/CRP
GARCIA_TARGETS_OF_FLI1_AND_DAX1_UP	50	0.453436	1.70305	0.00343249	0.00998602	0.00472921	5688	tags=30%, list=11%, signal=27%	FNDC4/ATP7B/HMGCL/STAT2/RFNG/STIM1/HLA-E/SEMA6A/NCKAP5/SNX14/SMIM14/NEIL1/WDR19/LMBR1L/PJVK
WANG_PROSTATE_CANCER_ANDROGEN_INDEPENDENT	64	0.431973	1.70282	0.00204592	0.00642179	0.00304125	10016	tags=44%, list=20%, signal=35%	SDC2/ALDH4A1/HGD/MT1H/DST/CDC14B/DCXR/BAIAP2/ARHGEF28/AP2A2/ID2/EDA/LILRB3/RAB27A/FN1/LTB4R/SOD2/FBXO11/MCL1/CYREN/PRPF19/USPL1/SPCS3/DBP/NR4A3/EIF3B/NMT2/SLC4A1AP
GARGALOVIC_RESPONSE_TO_OXIDIZED_PHOSPHOLIPIDS_LIGHTYELLOW_UP	11	0.663653	1.70242	0.0155405	0.0348362	0.0164978	11626	tags=73%, list=23%, signal=56%	PNPLA8/ZDHHC18/PIM1/SIRT1/USP12/UGDH/RBBP6/CSGALNACT2
REACTOME_FATTY_ACYL_COA_BIOSYNTHESIS	37	0.482678	1.70229	0.00728266	0.0185272	0.00877419	5752	tags=35%, list=11%, signal=31%	ACSL1/ACSL5/CBR4/ACSF3/SLC27A3/ELOVL6/ELOVL2/SLC25A1/HSD17B3/HSD17B12/HTD2/HSD17B8/SCD
REACTOME_METABOLISM_OF_PORPHYRINS	16	0.593134	1.7021	0.0144702	0.032897	0.0155794	7844	tags=56%, list=16%, signal=48%	UGT1A4/ALAD/CPOX/ALAS1/COX15/HMOX1/UROD/FECH/COX10
COLLER_MYC_TARGETS_UP	24	0.533513	1.70192	0.0107914	0.0259265	0.0122784	9585	tags=50%, list=19%, signal=41%	ASS1/G0S2/AK4/PPIF/NAMPT/SLC16A1/TRAP1/AHCY/GRPEL1/HDGF/HSPD1/NCL
PID_ERBB2_ERBB3_PATHWAY	44	0.464934	1.70048	0.00457247	0.0125904	0.00596262	10141	tags=45%, list=20%, signal=36%	MAP2K1/CHRNE/PRKACA/PIK3R1/NRG1/RAF1/STAT3/ERBB3/MTOR/SOS1/PIK3CD/PTPN11/AKT1/PIK3CA/MAPK8/JAK2/MAP2K2/MAPK1/USP8/DOCK7
BANDRES_RESPONSE_TO_CARMUSTIN_WITHOUT_MGMT_24HR_UP	14	0.617301	1.70028	0.0141319	0.0322532	0.0152746	2623	tags=29%, list=5%, signal=27%	ECM2/AVPR1A/STS/CYTH1
ROZANOV_MMP14_CORRELATED	10	0.680949	1.70026	0.017341	0.0382092	0.0180952	5435	tags=50%, list=11%, signal=45%	DAPK1/NR3C1/STK38/NNT/PIK3CD
BIOCARTA_CHREBP_PATHWAY	19	0.563931	1.69946	0.0122932	0.0287724	0.0136261	7539	tags=47%, list=15%, signal=40%	MLXIPL/PRKAB2/PRKAG2/PRKAA1/ADCY1/PRKAG3/PRKAB1/PRKAR1B/ACSM1
REACTOME_SIGNALING_BY_RAS_MUTANTS	58	0.439426	1.69898	0.00295656	0.00882632	0.00417999	9767	tags=41%, list=19%, signal=33%	MAP2K1/FGG/FGA/FGB/PEBP1/MAP3K11/CAMK2D/RAF1/APBB1IP/CSK/ARAF/FN1/KSR1/TLN1/ARRB2/BRAP/CALM1/ITGB3/CAMK2B/JAK2/MAP2K2/MAPK1/MARK3/ARRB1
BOYLAN_MULTIPLE_MYELOMA_C_UP	48	0.455643	1.69891	0.0043172	0.0120544	0.00570874	8012	tags=38%, list=16%, signal=32%	ANGPTL4/PTGR1/DPP4/FAM13A/STX2/ZFPM1/DHX38/APOBEC2/MTOR/PDE2A/LGR5/RBKS/ETS1/SKP2/PTER/CLIP1/HNRNPD/NASP
PID_CXCR3_PATHWAY	43	0.465942	1.69863	0.00500341	0.0135225	0.00640403	9767	tags=51%, list=19%, signal=41%	MAP2K1/GNAO1/MAPK14/PIK3R1/RAF1/GNAI2/GNAI1/ITGAL/MAP2K3/MAPKAP1/MTOR/PIK3CD/RICTOR/AKT1/PIK3CA/GNG2/ITGB2/MAP2K6/MAP2K2/MAPK1/PDPK1/ARRB1
SCHAEFFER_PROSTATE_DEVELOPMENT_AND_CANCER_BOX5_UP	10	0.680252	1.69852	0.0175634	0.0385293	0.0182468	8542	tags=60%, list=17%, signal=50%	EHBP1/PID1/ALDH1A1/PELI2/EMCN/SVIL
FALVELLA_SMOKERS_WITH_LUNG_CANCER	80	0.411781	1.69828	0.00160698	0.0051735	0.00245008	9803	tags=40%, list=19%, signal=32%	FGG/APOL6/C1S/MET/CYP1A1/RNF125/CAMKK2/EPAS1/FKBP5/FOLH1/RCAN1/ENG/CYTH1/NAMPT/DUSP1/OTUD4/SRPRA/SCAF11/AZGP1/IL6ST/SRSF5/SOD2/RAB12/MCL1/PGS1/UFM1/MVD/HSPD1/USP10/NEAT1/NR4A3/SEC61A1
BYSTRYKH_HEMATOPOIESIS_STEM_CELL_AND_BRAIN_QTL_CIS	65	0.428759	1.69609	0.00204685	0.00642179	0.00304125	9884	tags=38%, list=20%, signal=31%	ACAA1/ALAD/ACADL/MYO7A/ELOA/SC5D/OCEL1/ZFAND5/USP38/CUX1/ALDH9A1/PRKCE/KLC1/VPS52/SARAF/MTIF2/ZFP91/PDXDC1/KMT2E/MRPL44/GATAD2A/AC055839.2/DPP7/ARHGAP9/ZMYM6
BASSO_CD40_SIGNALING_DN	71	0.421058	1.69571	0.00136302	0.00451644	0.00213891	7547	tags=35%, list=15%, signal=30%	METTL7A/ALDH5A1/GPER1/AQP3/RAPGEF2/ST3GAL6/ST6GAL1/IRS1/AKAP2/ID1/BLNK/CRYZ/CD38/TUBB2A/ITGB7/BICD2/ARHGEF18/HSD17B8/JCHAIN/GSDME/GRAP/BCL6/RASGRP2/SYK/CTDSP2
TSAI_DNAJB4_TARGETS_UP	13	0.628977	1.69565	0.0148215	0.0335328	0.0158805	8694	tags=54%, list=17%, signal=45%	SESN2/IFIT1/IFIT3/IRF9/TXNIP/OAS3/STAT1
PID_ENDOTHELIN_PATHWAY	63	0.431288	1.69522	0.00272851	0.0082348	0.00389986	9394	tags=41%, list=19%, signal=34%	MAP2K1/PRKCA/GNAO1/PTK2B/MAPK14/EDNRB/ADCY1/RAF1/GNAI2/GNAI1/CRK/GNAQ/PLCB2/GNA11/ADCY9/PRKCE/GNA14/AKT1/BCAR1/MAPK8/JAK2/ADCY7/PRKCB/MAP2K2/PRKCQ/MAPK1
PODAR_RESPONSE_TO_ADAPHOSTIN_UP	150	0.370632	1.69521	0.00023753	0.00110632	0.000523932	9624	tags=37%, list=19%, signal=30%	PSAT1/CLU/FNDC3A/GADD45A/GABARAPL1/KLHL21/IGFBP3/AKR1C3/NFE2L1/TMEM140/AKR1C1/FYN/MGAT2/DNAJB9/MBNL2/MACO1/BACH1/DUSP1/SAT1/GCLM/ZEB1/IFRD1/ZFAND5/ID2/ITGAX/BSDC1/TUBB2A/CEBPB/HMOX1/CLK1/MIR22HG/MORC3/CEBPG/NEK1/HEXIM1/SLC38A2/NCOA2/NLRP1/HBP1/SEC24D/RND3/STX12/PNRC1/C16orf72/IFNGR1/ZBTB43/TRIB1/CLIC2/DNAJB4/ASF1A/PLEK/HDLBP/MXI1/VEGFA/NEAT1
NIKOLSKY_OVERCONNECTED_IN_BREAST_CANCER	22	0.543298	1.69509	0.0136925	0.0313881	0.0148649	12061	tags=64%, list=24%, signal=48%	HNF1A/FOXP2/STAT4/IRF8/CUX1/NFIX/MEF2C/STAT1/NFYC/TCF7L1/ATF2/HOXA4/ETV5/POU2F1
LASTOWSKA_NEUROBLASTOMA_COPY_NUMBER_UP	183	0.360352	1.69493	0.000242836	0.00110632	0.000523932	9168	tags=35%, list=18%, signal=29%	KHK/ASGR1/ABCC3/TMEM220/TIAF1/ACADVL/SLC38A10/ACBD4/P4HB/SLC25A10/ALDH3A2/AKAP1/VTN/MED13/ALDOC/NDEL1/CCL14/BAIAP2/GPRC5C/TACO1/SMC6/CRK/NCOR1/STAT3/ATPAF2/MAP2K3/DPH1/DUS1L/SYNRG/ANKFY1/RFFL/KSR1/SOS1/NTN1/TNFAIP1/CEP95/MRPL38/CCDC47/LUC7L3/MINK1/HEXIM1/ANKRD40/NEURL4/GPATCH11/POLG2/TMEM106A/SMCR8/ALOX12-AS1/SCO1/SEC14L1/EZH1/PITPNA/FLOT2/ZNF18/MRPL12/GPS1/CD300LF/EFCAB13/CTC1/NUP85/NCBP3/TRPV2/…
YAO_TEMPORAL_RESPONSE_TO_PROGESTERONE_CLUSTER_11	99	0.396706	1.69475	0.000700117	0.00255039	0.00120782	6179	tags=24%, list=12%, signal=21%	IGF1/RDX/CDO1/ALDH1A2/CLCN5/ADH5/HOMER2/SYNPO/SEPT4/IL13RA2/MRTO4/HSP90B1/HSPA5/NPL/EPB41/MYRF/PEX11A/TUBB2A/AARS/DUS1L/GSTM1/PDIA6/TIMM8A/NCBP1
MATZUK_PREOVULATORY_FOLLICLE	10	0.678555	1.69428	0.0177857	0.0388496	0.0183985	6677	tags=50%, list=13%, signal=43%	IRS2/TNFRSF1A/IMMP2L/SOD1/ESR1
HAHTOLA_MYCOSIS_FUNGOIDES_CD4_DN	114	0.38593	1.69413	0.000233209	0.00110632	0.000523932	8869	tags=33%, list=18%, signal=28%	FAM8A1/KLF9/C19orf66/CD81/PEBP1/MALT1/PGRMC2/STAT5B/COX11/NMRK1/PPP3CC/WWP1/MPRIP/MPHOSPH9/SLC12A7/IL6ST/ARHGEF18/SEPT6/ZC3HAV1/TMEM123/LUC7L3/SNX1/CCNG1/CALM1/PITPNB/LCP2/UBQLN2/NLRP1/MDFIC/ADD3/RBM26/TRAK2/UGCG/UBP1/YTHDC2/VAMP1/EIF5B/ATG12
REACTOME_REGULATION_OF_MECP2_EXPRESSION_AND_ACTIVITY	31	0.49965	1.69411	0.00876011	0.0216814	0.010268	8342	tags=48%, list=17%, signal=40%	HIPK2/PRKACA/CAMK2D/NCOR1/AGO4/TNRC6A/LBR/TNRC6B/CALM1/MOV10/AGO1/HTT/CAMK2B/AGO3/TBL1X
GROSS_HYPOXIA_VIA_ELK3_AND_HIF1A_UP	142	0.372506	1.69382	0.000708717	0.0025551	0.00121005	7706	tags=30%, list=15%, signal=26%	ERRFI1/SLC37A4/LRP5/TNFRSF10D/GBE1/ANGPTL4/ZBTB20/CLCN5/RORA/AK4/SPRY2/JMJD1C/RUSC2/DEPP1/PPP1R3B/MERTK/RCAN1/BNIP3/INSIG2/IL13RA1/SAT1/SLC19A1/PDPR/SDC4/ZNF330/DUSP16/RNGTT/PHLDA1/NFKBIZ/CHIC2/ARHGAP5/RND1/ETS1/NEDD4L/AFG3L2/APPL2/SOAT1/CD93/PNRC1/PTCH1/ZFP36/MAPK6/SELENBP1
WANG_ESOPHAGUS_CANCER_VS_NORMAL_UP	119	0.384099	1.69361	0.000470367	0.00180771	0.000856099	7675	tags=29%, list=15%, signal=25%	MST1L/AQP9/SERPING1/ACAA2/C1R/DAPK1/C1S/IGFBP3/C4A/KNG1/AGPAT2/GPX2/AMPD2/GSTO1/TCF7L2/ECE1/SDC4/PNPLA2/PLS1/TNFRSF1B/PARP14/TSPAN18/HSD17B3/NOTCH4/ARID5A/FN1/IFITM3/DAP/DUSP6/JCHAIN/HLA-A/GNB5/BTN3A3/LGALS2/TBXAS1
REACTOME_ASPARTATE_AND_ASPARAGINE_METABOLISM	11	0.660213	1.6936	0.0164414	0.0365617	0.017315	2416	tags=55%, list=5%, signal=52%	ASPG/GOT1/GOT2/SLC25A13/FOLH1/ASPA
HUANG_FOXA2_TARGETS_UP	47	0.456479	1.69343	0.00456308	0.012572	0.00595388	6169	tags=32%, list=12%, signal=28%	PSAT1/C5/PCK2/HPGD/ENPP1/KAT2B/FST/TLE4/CPM/NRG1/PLEKHA1/SOCS2/FN1/TFPI2/DISC1
REACTOME_MAP2K_AND_MAPK_ACTIVATION	40	0.47166	1.6931	0.00779459	0.0196587	0.00931001	5474	tags=32%, list=11%, signal=29%	MAP2K1/FGG/FGA/FGB/PEBP1/RAF1/APBB1IP/CSK/ARAF/FN1/KSR1/TLN1/ARRB2
REACTOME_ATF6_ATF6_ALPHA_ACTIVATES_CHAPERONE_GENES	10	0.677947	1.69277	0.0182303	0.0396912	0.0187971	8808	tags=50%, list=17%, signal=41%	CALR/HSP90B1/HSPA5/ATF6/NFYC
REACTOME_SIGNAL_TRANSDUCTION_BY_L1	21	0.548562	1.69244	0.0139986	0.0319959	0.0151527	4436	tags=33%, list=9%, signal=30%	MAP2K1/EGFR/VAV2/ITGA5/CSNK2A2/NRP1/ITGA9
BIOCARTA_CD40_PATHWAY	15	0.602868	1.6924	0.0157021	0.0351682	0.0166551	10431	tags=53%, list=21%, signal=42%	DUSP1/IKBKG/MAP3K14/CD40/RELA/ELP1/TNFAIP3/TRAF6
SESTO_RESPONSE_TO_UV_C8	71	0.420225	1.69235	0.00136302	0.00451644	0.00213891	7115	tags=32%, list=14%, signal=28%	GJB2/PGM1/DST/SORL1/MT2A/SDHA/CSNK2A2/PTPRK/GLG1/IL4R/FGFR3/ALCAM/RFC1/PON2/ALDH9A1/MYH10/ITPK1/PRDX6/BRD3/FHL1/LAMB1/PPP2R5A/TNFSF10
BOQUEST_STEM_CELL_CULTURED_VS_FRESH_DN	31	0.499068	1.69214	0.00876011	0.0216814	0.010268	1904	tags=26%, list=4%, signal=25%	APOE/C3/TMEM176B/CD14/IGF1/SERPINA5/WNT11/ADH1B
WENDT_COHESIN_TARGETS_UP	33	0.491692	1.69148	0.00876799	0.0216814	0.010268	6939	tags=39%, list=14%, signal=34%	JMJD1C/AKAP2/TRMT11/GOLGA8A/PLEKHA5/MEF2A/MKLN1/ALCAM/CAST/FRA10AC1/RND3/USP25/YOD1
BARRIER_CANCER_RELAPSE_NORMAL_SAMPLE_UP	33	0.491663	1.69138	0.00876799	0.0216814	0.010268	7783	tags=39%, list=15%, signal=33%	IGF1/ALDH3A2/CLINT1/MAPRE2/FAS/CREBL2/RNGTT/RAB27A/PTGER2/SNX4/IL1R2/MAP7/LRMP
HOWLIN_PUBERTAL_MAMMARY_GLAND	63	0.430296	1.69132	0.00272851	0.0082348	0.00389986	5827	tags=35%, list=12%, signal=31%	COL18A1/HAL/CYP4V2/HSD11B1/NAT8/SLC30A1/AOX1/MARCO/PCK1/CCL15/ELOVL6/PTEN/MYCL/APBB1IP/CTSB/CXCL12/EPS8/FCGR2B/EPS15/NFIL3/IL1R2/TDRP
FAELT_B_CLL_WITH_VH3_21_UP	43	0.463827	1.69092	0.00568569	0.0150792	0.00714124	8674	tags=44%, list=17%, signal=37%	POR/CLUH/SLC25A42/ZBTB48/CALR/DVL1/SAFB/TOP3B/PRKCSH/MYO9B/PTPN1/EIF4G1/ARHGEF1/UBTF/VCP/IGHV3-23/KCNAB2/BCR/PPT2
ADDYA_ERYTHROID_DIFFERENTIATION_BY_HEMIN	73	0.41744	1.68928	0.00114495	0.00386411	0.00182997	7876	tags=37%, list=16%, signal=31%	ATF5/SLC27A2/CXCL2/SLC43A3/CPOX/APOC1/MT2A/AKR1C1/INSIG1/HERPUD1/CTSL/PIM1/HSPA5/NPL/SOCS2/ID2/RTN4/CEBPB/CEBPG/TXNIP/NLRP1/AKR1C2/ADAM10/MCL1/ICAM3/FECH/MEF2C
REACTOME_CELLULAR_HEXOSE_TRANSPORT	21	0.547334	1.68865	0.0139986	0.0319959	0.0151527	5273	tags=43%, list=10%, signal=38%	SLC2A12/FGF21/SLC5A9/SLC2A2/SLC45A3/SLC2A9/SLC2A8/SLC5A4/SLC2A10
KEGG_GLIOMA	65	0.426833	1.68847	0.00204685	0.00642179	0.00304125	7505	tags=35%, list=15%, signal=30%	MAP2K1/EGFR/PRKCA/IGF1/SHC2/AKT2/PLCG2/PIK3R1/PTEN/CAMK2D/RAF1/CDK6/MTOR/ARAF/SOS1/PIK3CD/CALM1/PIK3R5/AKT1/PIK3CA/CAMK2B/PDGFRA/SOS2
PID_AJDISS_2PATHWAY	48	0.452829	1.68842	0.00454442	0.0125427	0.00594001	9021	tags=38%, list=18%, signal=31%	IGF2/CDH2/EGFR/MET/FYN/MEP1B/ABL1/CABLES1/SNX1/CREBBP/PTPN1/CTNND1/ADAM10/DNM2/TIAM1/PTPN6/CDH1/RAB5A
[truncated: 3,431 more rows]

## Sheet: Table S11. c3
Description	setSize	enrichmentScore	NES	pvalue	p.adjust	qvalues	rank	leading_edge	core_enrichment
[truncated: 674 more rows]

[truncated: 1 more sheets: Table S11. hallmark]
