# Supplementary material for: The Oncogenic PI3K-Induced Transcriptomic Landscape Reveals Key Functions in Splicing and Gene Expression Regulation
Source: Oxford University Press journal article supplement (doi:10.1158/0008-5472.can-22-0446), 2022-04-20
Supplement: can-22-0446-sst12.xlsx [file can-22-0446-sst12.xlsx]

## Sheet: Table S12
Table S12. ATAC-seq Homer de novo motifs enriched upon treatment to alpelisib
Patient 1:
Motif	P-value	% of Targets	% of Background
ELK1	1e-64	0.189	0.0812
CREB	1e-60	0.219	0.1048
AP-1	1e-52	0.0841	0.0241
PBX1	1e-24	0.0888	0.0111
FOXA1	1e-22	0.01	0.0006
GATA1	1e-22	0.01	0.0006
NR	1e-15	0.0757	0.04
Patient 2
Motif	P-value	% of Targets	% of Background
PAX8	1e-29	0.0058	0.0001
E2F6	1e-16	0.0082	0.0008
ELK4	1e-08	0.0075	0.0015
STAT3	1e-08	0.0449	0.0227
FOXA2	1e-07	0.1864	0.1497
NR (ESRRB)	1e-06	0.233	0.1953
